# Supplementary material for: Interplay between Nrf2 and αB-crystallin in the lens and heart of zebrafish under proteostatic stress
Source: Front Mol Biosci. 2023 Jul 28;10:1185704. doi: 10.3389/fmolb.2023.1185704 (PMC10422029; doi:10.3389/fmolb.2023.1185704)
Supplement: Supplementary file 2 [file DataSheet1.XLSX]

## Sheet: Lens_RNAseq_cpm
	control_WT	control_WT.1	comparison_aba	comparison_aba.1	comparison_nrf2	comparison_nrf2.1	comparison_aba_nrf2	comparison_aba_nrf2.1
slc35a5	43.86	54.67	61.27	34.63	60.73	45.61	67.09	56.71
ccdc80	1122.14	934.33	1367.73	711.37	1322.27	1109.39	1222.91	1108.29
nrf1	216	163	171	105	202	283	171	152
ube2h	2245	2350	3103	1947	1414	1825	2255	1859
slc9a3r1a	101	65	114	51	72	66	92	67
dap	273	214	194	145	197	269	169	210
itsn1	388	351	493	296	393	389	561	442
myh10	8541	9090	9930	6211	6876	6914	9645	7640
tmem267	125	91	140	121	125	163	126	81
thraa	27	22	47	30	36	23	30	22
itsn2a	0	4	0	4	0	2	0	0
hoxb2a	0	0	0	0	0	0	0	0
ptpn4b	212.03	219.54	270.43	150.59	266.34	228.59	262.27	177.44
sema6e	3104.33	3203.6	3499.17	2525.92	2394.41	2820.25	3591.83	2871.48
krt97	4867.09	3492.56	2255.76	4639.81	791	903.99	1277.52	1019.83
usp49	89	62	105	69	52	44	71	47
slc40a1	3568	3336	3692	2295	2170	3232	2769	2147
dcaf8	560	568	601	518	749	1782	524	740
cfap300	0	0	0	0	0	0	0	0
prkag3b	0	1	0	0	0	0	0	0
triob	758	953	732	570	614	782	763	659
pde6a	5	4.22	10	2	3	3	2	6
matr3l1.1	944	775	1130	758	773	901	864	720
si:ch73-314g15.3	75	73.99	170	102.9	45.84	34.66	79.97	44
slc39a13	2323	2063	1862	1294	2632	2349	2194	2689
nitr2b	0	0	0	0	0	0	0	0
cntn2	1	0	0	0	0	0	0	0
tnni1a	0	0	0	0	0	0	0	0
pms1	73	38	77	52	38	59	78	45
upf3b	1197	1201	1663	1201	990	1234	1300	1130
stx1b	0	2	1	0	0	5	0	1
ankar	3	0	1	0	0	7	0	1
ofd1	91	86	64	77	109	96	59	74
asdurf	679.22	611.09	831.13	537.18	627.07	705.15	663.12	673.12
gtf2e1	256	207	312	185	241	299	248.02	226
slc1a4	2219	1350	2753	1756	370	542	1726	2040
ttn.1	1341	1346	2461	1710	1331	1779	2557	715
znf281a	37	34	52	26	48	49	47	37
ell	3076	3062	3413	2013	3101	3382	2786	2338
grasp	499	397	474	265	545	656	545	313
dnah6	4	17	31	12	11	9	8	3
ptpn4a	736	750	892	613	544	653	769	606
opn1mw4	0	0	0	0	1	0	0	1
osgepl1	78	55	103	51	83	108	59	55
psmb9a	21	21	33	25	5	0	6	2
creg2	608	660	663	525	630	770	665	671
sypl2b	88	52	56	36	55	91	84	73
daxx	148	155	172	156	120	113	163	90
slc6a22.1	103	158	175	213	61	83	112	72
lcmt2	134.45	112.37	209.42	145.43	155.12	186.44	147.71	128.87
znf511	91	90	74	95	69	109	66	63
spi1b	2	1.01	0	3.1	1.16	9.34	4.03	3
scfd1	1877	1896	2251	1556	1529	1937	1915	1498
nr4a1	7	7	7	5	4	9	10	2
rassf6	3	5	11	7	9	19	9	6
telo2	145	85	132	90	128	129	148	118
snx9a	309	278	277	194	329	287	265	262
dstyk	741	635	823	542	714.02	632	803	608
mapk14a	332	292	373	221	231	237	309	189
scrib	4814	4664	6015	3811	4229	4640	5103	4420
zgc:56699	0	0	0	0	0	0	0	0
skap2	0	0	0	0	0	0	0	0
unk	101	86	65	79	78	57	56	85
dzip1	93	81	77	67	73	118	116	76
ncor2	600	586	751	494	482	467	649	483
myh9b	2423	2493.03	2800.6	1565.7	2165.2	1834.21	2130.96	1906.78
znf384l	568.98	502.2	659.81	473.32	272.48	264.39	434.39	309.16
bysl	825	716	836	686	1153	1202	1008	979
slc17a6a	0	0	0	0	0	0	0	0
dicer1	382	402	393	230	356	311	407	360
rimbp2	117	117	184	97	91	101	102	65
matr3l1.1	856	765	922	626	839	925	933	873
hsd17b8	85	79	90	61	100	139	107	83
arl14ep	210	172	225	181	186	192	179	156
mycbp2	2036	2107	2543	1648	1611	1724	1992	1686
map4k2	20	24	56	34	51	95	54	47
puf60b	1804	1712	2090	1477	1558	1839	1632	1412
srrm1	918	819	1101	798	741	879	928	809
pcgf1	52	60	61	55	69	66	41	44
gas2a	3	3	6	3	2	3	4	3
psmb8a	29	9	6	5	0	2	0	0
g2e3	1	5	9	2	8	10	2	2
slc6a22.2	4	7	17	3	6	1	4	8
mctp2a	14	6	11	14	17	31	12	24
actn3b	3	5	2	6	0	1	0	0
slc2a1a	1	0	0	0	0	0	0	0
inppl1b	8	3	4	1	8	7	4	0
mier1b	132	110	148	101	130.02	157	160	100
adam8a	1	2	2	0	0	0	3	0
tdh2	1572	1424	1136	1255	1375	1590	1427	1652
mhc1zea	280.28	236.57	418.83	308.36	209.39	230	235.27	162.76
skap1	3	3	2	6	0	3	5	0
sp3a	16	10	11	16	33	39	28	7
tomm34	178	161	283	170	177	208	227	139
kifc1	6	14	14	5	42	18	18	31
csmd2	34	113	82	94	12	21	57	58
prf1.3	0	0	0	0	0	0	0	0
echs1	645	592	746	622	512	715	630	623
nfyal	155.34	143.27	137.84	83.17	109.85	142.66	136.31	126.97
kirrel1a	15	33	34	33	11	35	23	14
psmb13a	0	0	1	0	6	2	0	0
gpm6bb	1122	906	1139	713	1062.52	1072.93	915.91	707.58
uckl1a	0	0	0	0	0	1	0	0
flot1a	32	51	32	34	70	48	42	54
si:ch211-247n2.1	9	6	2	8	7	12	14	15
oc90	0	1	0	0	0	0	0	0
strn3	641	654	883	548	643	735	764	613
gulp1a	87	49	122	41	178	117	145	119
fkbp8	358	336	391	270	286	380	297	301
noc2l	312	134	425	351	313	265	317	325
tnxba	0	0	0	0	0	0	0	0
slc29a2	0	2	0	1	9	4	3	1
ptpra	1025	855	1263	715	893	1009	1064	775
otol1a	0	0	0	0	0	0	0	0
stim2b	2	10	1	1	6	1	10	10
nup155	220	201	228	254	199	240	241	236
tspan11	979	847	781	423	979	986	817	737
prkacba	7.04	8.01	3.63	5.09	11.14	6.25	2.33	6.63
irx2a	0	0	0	0	0	0.88	0	0
atp5po	1710	1526	1876	1612	1663	2021	1561	1554
kcnh6a	0	1	4	0	0	1	0	0
zgc:112148	94	73	94	43	68	67	51.93	55
tnfrsf21	68	35	29	23	27	33	14	20
zmp:0000000521	13	5	8	4	14	2	15	4
c3b.2	0	0	1.18	0	0	0	3	0
cfap43	11	5.04	10	9	0	2.01	6	1
zgc:112982	856	840	1010	790	923	1049	896	750
nalcn	26	12	42	45	35.81	43	23	29
aff4	406	412	415	300	337	288	432	356
dbx1b	0	0	0	0	0	0	0	0
atp1a1a.4	3	5	13.76	12	2	4	2	18
phgdh	2510	1719	1676	1100	1655	1393	2034	1572
nav2b	713	741	867	570	682	583	835	784
stx3a	152	120	134	100	97	100	108	79
cacnb3a	0	0	0	3	0	0	0	0
kbtbd12	27	21	28	18	21	13	14	12
ppm1ba	1117	1088	1351	900	993	1396	1122	970
tuba1a	1738.08	1648.95	2827.82	2988.17	1366.63	1433.72	2451.06	2304.69
stt3b	914.38	834.23	994.48	712.27	836.58	799.61	923.84	777.63
syt14b	3.08	1	3	0	1	4	0	3
man2b1	323.63	297	358.94	271	314	393	315	222
manea	96	87	112	86	80	108	111	117
si:dkey-247m21.3	0	1	0	0	1	7	0	1
vill	0	0	0	0	0	2	0	0
rorab	374	346	372	223	325	300	290	248
drd4-rs	6	7	2	6	1	0	3	0
palmda	0	0	0	0	0	0	0	0
pink1	438	406	561	362	418	356	377	428
klhl15	526	346	531	439	326	442	494	435
prkag2b	5	3	6	3	3	5	4	6
LO018422.1	27.15	25.23	27.7	10.02	17.57	17.11	12.82	13.02
b3gat3	344	273	408	321	275	276	394	313
dnajc1	1600	1287	1653	1252	1294	1320	1447	1080
ak1	328	231	281	212	266	368	214	222
pfkfb3	294.64	214.19	408	343.09	229	259	304	233
dock5	575	623	671	438	513	640	572	464
txlng	129	113	110	68	123	132	123	97
cthrc1b	1	4	2	2	0	8	3	0
hsd11b2	7	3	3	5	2	8	7	5
fkbp16	4	3	5	12	0	0	0	0
myhb	1	0	4	0	0	0	1	0
stxbp1a	1	0	1	0	0	10	0	2
adamts18	150	229	121	77	144	113	81	104
lmcd1	156.98	198	421	206	99	150	196	53
rxrbb	673	610	671	514	461	568	663	591
grb10a	56	46	38	17	53	86	55	72
ppil2	199	179	212	208	314	389	399	232
rictorb	240	240	288	237	258	185	264	209
pygb	120	115	140	96	134	112	120	109
qkib	13	34	15	23	23	17	33	14
tox4a	83	87	114	49	104	62	98	73
pfkfb2b	103	93	53	41	42	36	58	25
brf2	51.79	51.15	69.33	44.74	56.92	45.92	44.1	59.87
adss2	58	51	45	39	57	44	43	18
mnat1	69	63	88	59	52	59	54	86
csnk2a1	1608	1822	1615	1219	1340	1577	1675	1319
lamb2	436	404	459	304	415	351	448	418
si:dkeyp-52c3.7	0	0	1	0	2	6.96	0	0
stam	490	385	546	321	393	408	469	407
cwf19l1	121	123	112	67	94	88	100	78
celf2	232	260	244	188	203	187	197	170.7
psme1	103	67	56	61	56	44	63	37
cacnb1	5	5	2	9	8	0	2	6
tra2b	199	228	236	137	233	253	206	158
aplnra	16	17	12	13	39	14	13	15
itfg2	223	212	237	167	157	195	179	144
igbp1	200	188	286	192	167	167	243	160
chmp2bb	884	868	1106	747	749	958	910	822
aspn	0	0	2	0	3	0	0	0
rho	20	10	15	21	18	60	22	76
rhd	0	0	0	1	0	0	0	1
bach1b	156.81	156.71	125.43	81.07	84	119.31	111.06	81.92
pygl	0	0	1	3	0	2	0	0
hspb11	0	0	0	0	0	0	0	0
stk25a	165	109	248	170	83	75	117	98
invs	102	62	136	95	58	98	126	80
rtca	455	388	545	320	387	351	404	274
tbx3a	0	0	2	2	0	0	0	0
scocb	635.74	680.18	695.14	465.8	504.43	552.98	579.44	597.69
si:dkey-103j14.5	0	1	0	0	0	0	0	0
C5H9orf78	692	675	882	631	466	674	625	500
sypb	55	29	7	27	10	7	43	48
plpp2a	340	261	239	186	257	216	322	273
mmp14a	4	7	5	2	0	14	0	0
psmb6	977	849	1202	943	728	897	853	841
kcna2a	0	0	0	0	0	0	0	0
tbxas1	998	742	962	705	720	693	790	547
epb41l3a	96	17	52	22	65	46	28	29
ca15c	0	0	0	0	0	0	0	0
mrpl41	182	167	179	185	109	167	228	170
dcaf13	354	244	420	337	412	348	382	304
zfand5b	331	245	462	278	184	274	283	277
mcoln1a	247	221	96	91	196	195	137	147
si:ch211-197g15.6	4.71	0.72	0	3	0	0	0	0
si:dkey-21p1.3	0	0	0	0	0	0	0	0
ankrd22	4	3	0	0	0	2	2	1
arsh	9	5	7	0	4	2	0	5
p2rx2	72.43	74.26	97.19	82.68	33.27	68.89	112.05	73.92
gins2	0	0	5	5	4	1	2	7
me3	597	545	738	439	389	442	474	512
fabp11b	0	0	0	0	0	2	2	0
lhx8a	0	0	0	0	0	2	0	0
frmd6	274	297	307	183	158	200	201	170
fam102bb	45	36	28	40	39	36	30	25
dlc	2	7	2	15	1	9	5	1
sgf29	159	102	140	120	135	134	114	87
tubb4b	8884	7973.34	10551.6	7445.56	8589	9582	9375	7620
cyp11a1	0	0	2	0	0	0	2	3
tagapa	4	1	3.01	5	3.02	0	7	0
shpk	14	25	20	9	12	33	12	10
ubald1a	965	872	947	674	739	856	856	682
cers5	263	364	322	236	237	296	261	159
UBB	7134.87	7666.53	10045.4	10045.1	4913.76	7563.54	6288.35	5103.19
mief2	154	126	193	112	146	200	153	147
atm	416	294	387	201	251	209	338	206
tlcd1	0	0	0	0	0	0	0	0
ugt5d1	0	0	0	0	0	0	0	0
cry-dash	508	426	428	340	515	521	402	385
gale	23	24	44	10	35	33	17	31
ercc3	407	313	484	213	370	536	311	261
nusap1	6	22	23	9	24	15	18	15
si:ch211-225b11.1	1352	1654	1494	1286	1432	1429	1305	1317
zmynd10	0	0	5	0	0	0	0	0
pde4cb	0	0	0	0	0	0	0	0
prdm1a	0	2	0	3	0	1	10	1
arhgef37	463	437	539	339	522	534	598	412
rdh14b	300	295	350	238	420	511	473	326
ercc6l	3	10	10	7	16	13	3	18
wnt7ab	1	2	3	0	2	2	1	0
noc3l	339	215	276	213	408	363	441	339
itgb6	6	4	1	0	1	0	0	2
C7H16orf87	1168	1006	1236	915	963	1203	1022	911
itga10	2	0	1.02	0	2.07	0	0	4
ankrd33ab	3	0	0	1	2	2	0	0
zgc:153911	8	8	3	9	0	5	0	3
dmbx1b	2	7	1	6	0	0	0	0
hsdl2	364.13	320.08	342.34	248.05	305.16	302.34	314.12	335.08
adora2b	220	142	133	80	178	236	211	119
tm9sf4	586	430	530	346	320	317	420	373
smu1a	337	319	381	284	378	495	345	292
rundc3ab	96	127	161	189	134	121	98	104
eif3eb	674	573.19	767.73	532.3	581.57	630	612.15	482.06
mapkapk2a	295	248	262	148	179	149	227	134
syngr1a	0	2	0	1	1	1	0	0
tmod2	65	63	67	36	62	61	65	39
cabp5a	4	13.11	6	15	4	24.03	0	24
tbx15	13.58	6.59	3.72	6.29	8.52	13.49	11.46	14.41
dpysl3	277	291	263	156	262	221	233	346
mylpfb	28	15	48	34	12	22	15	19
ruvbl1	274	256	325	248	251	314	335	246
slc45a2	6	15	4	8	1	6	2	9
pabpc1l	0	0	0	0	0	0	0	0
pcsk1	3	3	3	9	1	4	4	4
irx7	0	0	0	0	0	0	0	0
unm_sa1614	530	536	671	610	286	333	497	411
rnf145a	2357	1661	2992	1795	1413	2037	2341	1828
rpa3	42	28	39	33	45	60	41	42
anxa11b	2828	2472	2300	1681	1676	1800	1915	1574
b4galt1	3	2	3	0	3	2	1	2
zgc:85722	6	1	6	5	5	9	0	8
sh3gl1b	215	153	251	135	219	185	224	152
rgs5a	12	12	21	14	15	19	9	11
stxbp5a	16	17	16	8	12	12	5	1
mapre1b	554	497	662	494	473	515	656	512
optn	528	395	541	395	440	471	482	492
kcnj1b	0	4	5	5	5	2	1	4
ATG14	372	452	454	330	348	384.75	337	374
tbcela	602	553	735	501	654	577	576	502
fam113	0	0	1.02	0	0	0	0	0
rabif	124	101	138	94	142	138	129	130
gnb3b	1	2	3	1	0	12	0	8
rasl12	7.07	10	8	6.5	3.02	11	8.04	1
her11	0	0	3	0	0	0	0	0
ncl	3299	2936	3201	2075	3091	3398	3049	2655
utp15	195	162	215	176	189	234	228	164
ankrd2	0	0	0	0	0	0	0	0
kiss1ra	0	0	0	0	0	0	0	0
sdc2	2186	1897	2358	1372	1818	1704	1945	1610
spon2b	0	0	0	0	0	2	0	0
tdh	4813	4430	1399	1405	1899	2375	2335	2034
sema6d	0	0	2	0	0	0	0	0
phf20a	76	85	88	58	67	86	92	81
pdcd2l	99	86	112	62	81	122	91	76
dedd1	434	360	568	362	674	503	479	579
gdf5	6	9	28	13	13	22	1	6
miox	0	0	0	0	2	0	0	0
pvalb2	0	0	0	0	0	0	0	0
si:ch211-48m9.1	7.16	7.14	13.06	27	6.39	15.16	7	8
pdx1	0	0	0	0	0	0	0	0
tle3a	335	348	430	230	281	328	277	324
ap2m1a	1339	1068	1369	1032	1098	1199	1168	1010
atp1a1a.1	24522.2	21906.2	21359	11333	22402	20143	21225.2	20065
arcn1a	612	481	701	553	580	622	584	448
meis3	0	0	0	0	0	0	0	0
BX908804.1	0	0	0	0	0	0	5	0
cog8	109	84	164	92	105	87	111	118
rasgrf2b	3	0	0	0	0	3	0	0
cep57l1	113	110	113	82	49	121	60	95
trmt2a	78	73	90	60	111	76	75	67
col4a4	9408.82	7703.37	9598.85	6570.33	5400.18	4973.79	7017.3	6605.41
si:dkey-28b4.8	985	867	970	704	743	809	841	649
fndc1	52	59	38	40	0	1	13	2
zgc:113210	79	85	115	89	63	97	73	78
reps1	450	431	600	420	381	396	441	376
vps50	108.56	92.6	117.58	87.97	72.04	56.88	114.59	79.19
aven	261.97	237.7	349.92	273.97	239.97	256.42	264.92	207.27
si:ch211-160o17.2	112.43	105.06	109.2	105.02	86.42	102.64	71.63	112.65
tjp3	0	0	0	0	0	0	0	0
adipor1a	1013	993	1156	938	826	1021	1036	867
sec31b	302	281	237	236	182	203	246	193
gls2b	1	0	0	0	0	0	0	0
gbx2	0	0	0	0	0	0	0	0
meis1a	0	0	0	0	0	0	0	0
bgnb	364	424	541	492	284	278	473	400
abcd3b	59	40	69	30	47	93	32	49
ppp6c	619	583	731	530	614	627	622	471
smo	231	197	239	191	149	176	225	202
si:dkey-32n7.4	1	4	4	0	4	8	0	0
gpr34b	0	0	0	0	0	0	0	0
pdap1b	716	693	865	792	671	972	751	607
a1cf	4	2	0	0	1	0	3	1
ss18	963	932	1106	633	875	1063	867	763
phc1	151	153	195	150	128	141	126	107
gda	0	0	0	0	0	0	0	0
tnnt2d	4	4	11	13	2	1	0	5
cep135	138	56	129	104	20	66	48	79
itpkca	763	916	878	863	636	968	877	710
prkcea	135	125	132	78	111	141	139	110
ube2al	298	277	386	242	170	228	227	173
lrrc4.2	6	2	7	0	14	7	18	17
hdac8	111	76	104	68	117	125	88	112
limk1b	36	35	54	15	57	91	67	50
scnm1	45	31	37	26	23	27	24	17
eif4a1b	5865	5656	5715	4469	5103	6520	5517	5061
hspa9	2154	1774	2401	1426	1868	2310	2269	2105
CABZ01111496.1	34	19	15	21	21	19	18	20
sorbs2a	1850	1548	2549	1582	1352	1694	1976	1640
tacr3l	19	18	11	9	21	16	10	13.01
fgfr1op	149	122	196	140	120	162	158	114
cd276	158	121	156	141	119	185	163.57	82
gorasp1a	281	232	278	166	204.57	254.49	249.05	215.24
btbd7	413	390	480	308	251	324	362	208
gpx9	6450	6997	8158	7231	5551	7061	7880	8728
mybphb	0	0	1	0	3	0	2	2
spire2	0	0	2	0	0	0	0	0
stambpl1	602	433	847	330	520	854	685	405
ubxn6	197	205	210	209	170	197	201	192
or103-4	0	0	0	0	0	0	0	0
oclnb	0	0	0	0	0	0	0	0
kdm5bb	990	1020	1214	955	877	1083	1109	964
rcan1a	2753	1468	4177	1974	1438	1884	2213	1804
ada	953	1397	979	1025	693	1592	2044	1359
zgc:123105	1293	1110	1490	984	1205	1359	1175	1062
apip	334	283	418	351	336	442	326	319
dachc	3	4	2	8	5	7	7	1
pxmp2	36	28	55	26	26	25	36	26
si:dkey-27m7.4	0	0	0	0	0	0	0	0
skp1	4336	4098	5476	3870	2959	3685	4098	3475
nudt21	352	283	424	329	300	419	398	336
nfkbil1	123.65	141.33	241	139.02	98	150	175	125.01
nr2f6b	474	555	569	443	497	582	480	484
mlst8	448	425	536.91	409	454	575	506	351
magi1b	204	180	304	162	254	288	264	230
stx5al	269	236	304	236	270	355	272	214
sult1st4	0	0	0	0	0	0	0	0
psmd1	1694	1562	1978	1492	1257	1311	1414	1493
rassf7b	112	85	102.95	16	128	110	66	80
wdr21	57.05	13.1	21.83	36.14	24.15	11.47	28.68	38.45
foxm1	7	7	11	15	3	13	3	5
rhcga	37	70	39	42	16	29	36	34
ngly1	113	98	175	138	112	124	122	139
chchd6a	991	1076	1329	859	1035	1096	989	925
mterf3	74	73	92	62	63	119	66	69
pomk	205	172	235	154	176	203	155	157
ano2a	0	0	0	0	0	0	0	0
naa15a	1059	920	1290	876	984	1080	1153	1021
anxa2a	17366	19528	19406	15462	12664	10827	11579	9146
urb2	100.06	79.35	120.92	80.62	98	76.06	105.01	63
bin2a	0	2	1	2	8	12	5	6
gdf9	0	4	2	0	4	0	0	0
nup88	155	164	239	124	232	258	200	213
gbp3	351	322	337	343	442	523	433	362
pik3cd	0	1	2	0	0	0	0	0
zbtb22b	28	13	33	3	24	17	15	20
zgc:101559	68	38	121	55	69	97	71	99
loxa	0	0	0	0	0	0	0	3
clcn3	658	476	639	445	549	674	615	478
dhps	497	423	681	447	484	540	518	357
pik3ip1	19608	26961	21628	18770	14884	18045	18483	16032
wdr12	134	100	137	92	135	172	117	95
dab1b	0	0	0	0	0	0	0	0
sox9a	1	2	0	5	0	3	4	0
stc1	56	95	105	105	23	14	88	84
stx16	236	175	226	168	179	243	236	191
emc2	1157	996	1398	935	1045	1111	1108	1071
pank2	524	471	650	400	536	566	500	531
eps8l1b	0	0	0	0	0	0	0	0
fam91a1	85	109	44	49	191	192	201	182
cacng5a	0	0	1	0	0	0	0	0
slf2	81	71	140	61	75	92	96	42
trpc2b	0	0	0	0	1	1	2	0
commd2	298	343	427	289	247	306	256	228
gng12a	84	81	132	67	75	87	104	61
si:dkey-275b16.2	219.63	95.54	164	1.89	38.27	1	2.8	1.53
si:ch211-266g18.6	0	0	0	0	0	0	0	0
cwc25	361	279	287	207	349	445	368	250
asb8	241	243	274	186	273	315	284	244
col4a3	14659.2	13421.6	15529.1	10689.7	12747.8	11987.2	12396.7	12337.6
rbpja	420	333	406	379	350	406	379	343
fgf8a	3	5	1	9	5	5	0	7
tenm1	301	359	471	402	185	223	152	221
foxa2	0	0	0	0	0	0	0	0
capslb	0	0	1	0	2	0	0	3
chrna5	0	0	0	0	2	0	0	0
igf2bp2a	53	24	23	18	20	16	34	33
hnrnpdl	1256.51	1177.45	1341.47	945.62	1188.51	1374.96	1287.48	1066.07
dhrs7	964	727	834	555	398	578	706	465
ippk	212	194	279	92	169	217	172	148
pde10a	154	149	134	97	102	124	158	102
fech	39	40	24	22	26	23	42	20
neurod4	0	0	1	0	0	3	0	0
sult1st5	0	0	0	0	0	0	0	0
ppp1caa	786	600	818	546	577	660	574	528
nup93	459	346	549	383	277	341	346	338
madd	695	602	571	394	498	598	581	446
anks1b	53.03	68	34.03	20	21	9	12	9
impa1	62	79	151	92	57	94	109	101
aprt	108	68	134.99	92	129	142	95	101
tbc1d14	326	353	656	448	273	427	431	306
itln3	0	0	0	0	0	0	0	0
psma5	720	599	851	608	655	658	713	633
mak16	579.6	414.59	539.88	417.6	828.87	1079.92	1087.66	679.97
tcea1	531.27	447.12	564.65	369.99	521.11	560.41	485.89	421.08
col8a1b	3	5	1	0	1	7	3	0
adarb1b	72	87	112	72	91	90	116	70
gnrhr2	0	0	0	0	0	0	0	0
dohh	1968	1574	1644	1199	2265	2743	2185	1599
hsp90b1	1137	964	1024	730	1017	1125	1135	973
dctn5	1736	1715	1983	1378	1553	2090	2608	2016
klhl32	177	260	131	136	151	129	156	133
pla2g7	96	110	177	113	129	145	174	132
surf1	125	122	123	100	129	116	147	83
rpl3	22801	17791	21312	14585	19610	23255	18726	15183
nr2f6a	243	230	235	204	223	244	280	250
slc26a3.2	0	0	0	0	0	0	0	0
arih1	477	453	568	385	372	436	528	411
clockb	291	292	326	262	282	295	337	287
zgc:172270	0	0	0	0	0	0	0	0
mogat3b	10	15	31	9	16	21	20	23
tfg	570	467	605	361	337	390	474	467
zfyve19	285	280	192	195	298	316	323	250
tmem59l	567	673	1821	649	739	695	373	249
cryl1	444	303	817	610	491	602	588	591
runx1t1	21	10	8	21	8	15	0	13
eif5	33546	27347	45422	31799	22467	31865	28489	24339
obsl1a	0	0	0	0	0	0	0	3
hars	1910	1484	1764	1409	1444	1722	1672	1230
vdac3	543	625	790	428	440	475	540	547
slc5a8l	2	2	2	0	2	0	0	2
atp7a	531	455	733	361	424	715	556	461
cldng	0	0	0	0	0	0	0	0
prnprs3	1946.27	1920.38	2211	1399.35	1818.3	1780	1880.77	1615
ryr2b	13	3	11	4	0	0	0	1.59
mitfa	0	0	0	0	0	0	0	0
polb	168	156	230	163	121	124	135	159
pfas	85	121	155	107	83	138	100	71
lats1	238	199	259	172	175	234	246	223
tspan2a	90	90	58	73	124	131	120	40
cnpy1	48	65	71	23	55	51	75	57
tada2b	132	130	159	133	119	151	166	102
pip4k2aa	246	208	233	154	190	182	212	209
ctnnd2b	1247	1050	1355	996	1191	872	1400	1256
dennd5b	995	953	1499	878	1027	936	1231	1070
idh2	3410	3183	3294	2584	2659	3035	2627	2413
asb2a.1	0	0	0	0	0	2	0	0
LHX3	0	0	0	0	0	0	0	0
aqp3a	0	0	0	0	0	0	0	0
plxnb2a	1236.21	1201.38	1215.89	744.94	1000.95	931.26	1124.37	1000.84
prkag1	437	364	446	318	372	386	472	350
nr1d2a	324	386	253	200	210	262	335	366
ankrd16	88	66	44	41	95	72	46	39
snapc1b	121	104	137	111	66	96	90	66
galnt2	135	129	137	88	132	118	99	114
stom	1070	665	1253	620	450	323	475	471
usb1	171	146	189	146	102	160	122	88
chm	229	149	286	164	195	208	229	158
mrpl21	60	41	67	51	70	81	58	44
acsl1b	19	15	13	9	13	9	10	14
cbx3a	344	269	351	262	381	338	289	277
pard6b	20	27	14	5	19	17	9	16
tm9sf2	1516	1317	1601	1104	1276	1467	1424	1055
cdk20	40	33	51	22	31	39	14	22
decr1	59	53	75	37	26	39	43	31
ccdc102a	321	271	314	160	160	190	258	110
pbrm1	221	248	289	198	209	200	157	145
zdhhc23b	41	30	46	20	32	28	26	35
gpr61l	99	176	141	114	88	194	174	117
ctsl.1	0	0	0	0	0	0	0	0
hapln2	0	0	0	0	0	0	0	0
sycp1	0	1	0	0	0	0	2	0
ftr01	2	0	1	0	0	0	0	3
med13b	531	561	687	486	522	560	576	485
setb	4080.12	3995.2	4175.01	3052.14	3250.17	3660.15	3905.1	2918.15
cx28.6	0	0	0	0	0	0	1	0
cldn12	542	493	506	325	407	449	430	448
cndp2	757	710	774	627	546	735	687	665
nxnl2	12	11	14	3	8	7	18	11
rpa1	638	439	879	592	563	659	524	435
mtfr1l	676	625	821	485	577	785	652	590
rrs1	217	148	237	175	220	266	280	232
nmur1b	0	0	0	0	0	0	0	0
pfn2	2349	1568	2970	1629	1109	1158	2040	1952
parp3	218	156	170	124	207	197	112	124
traf4a	1053	1258	1496	1091	1042	672	1332	1185
tlx1	0	0	0	0	0	0	0	0
larp6b	0	1	1	0	0	0	0	0
trim35-13	0	0	0	0	0	3	0	0
isl2a	0	0	0	0	1	0	2	0
chordc1a	89	87	114	85	61	42	74	72
spoplb	541	492	796	415	561	726	608	437
zgc:153896	65.16	50.22	65.33	43.64	62.7	65.35	59.65	42.78
LTN1	518.35	405	639.63	383.89	394.82	532	614	437
crhr1	103	88	53	105	5	17	33	19
fhl2b	0	0	0	0	0	0	0	0
syt9a	20	0	0	2	2	5	3	1
phyhipla	117	105	81	51	176	164	121	115
adcyap1a	0	0	0	0	0	0	0	0
spag1a	138	105	129	52	103	77	112	93
CHST13	31	22	38	16	27	15	39	8
isl1	0	0	0	2	0	0	0	0
arhgdig	0	10	7	1	0	2	10	3
cog2	106	115	143	116	117	107	101	119
phf6	223	228	333	236	242	258	202	166
marcksa	4	16	28	41	110	85	135	137
CR354540.1	0	1	0	0	0	6	0	0
uhrf1bp1l	366	259	600	270	563	697	565	498
galk2	44	25	94	50	63	46	43	31
bhlhe40	1296	1243	1385	819	1139	1242	1210	869
bach2b	267	231	282	183	201	213	208	207
acsl4a	227	203	172	80	143	189	173	147
cx39.9	0	0	0	0	0	0	0	0
acsbg2	2780	2928	2761	1883	1674	1938	2246	1884
tie1	27	16	30	58	3	43	4	8
zgc:162154	0	0	0	0	0	0	0	0
esr1	0	1	8	2	13	12	17	6
tti1	83	37	74	34	68	72	47	54
mgat4b	290	325	207	231	306	231	197	132
mvk	88	67	93	63	47	45	92	77
rttn	637	522	350	203	793	906	1321	925
usp19	626	541	754	521	598	668	784	595
zgc:92630	17	24	105	12	11	0	17	9
grm2a	4	3	2	0	12	1	3	0
rab23	121	91	196	100	145	140	156	161
orai1b	39	39	27	29	20	35	31	23
tmem63c	3	0	2	2	8	2	4	1
reep3b	959	927	1119	820	748	990	961	834
ik	722	611	942	527	631	579	720	633
zgc:110366	386	342	421	229	421	552	326	280
stmn1a	21	27	55	30	66	71	39	70
rabac1	378	295	375	291	386	294	346	356
copa	1341	1179	1587	908	1235	1297	1530	1193
cnot1	3037	3432	4049	2448	1902	2029	2542	2549
ulk4	41.31	30.28	64.71	30	73.25	42	64.7	63.9
fam169ab	915	678	855	638	701	740	767	870
nf1b	409	472	347	187	337	385	359	310
zgc:122979	0	0	0	0	0	2	0	0
cbx1a	954	912	1196	872	963	1181	1095	911
tnfsf10l	109	133	176	122	113	139	121	109
spam1	1	1	0	2	0	1	0	0
efhc2	1	2	0	1	0	0	0	0
ccdc106a	188	180	244	150	160	228	145	153
rnd1b	32	19	51	33	13	8	23	12
slc6a3	0	0	0	0	0	0	0	0
pde3a	80	44	67	38	10	7	67	54
dlb	3	1	1	0	0	0	0	0
asic4b	0	0	0	0	0	1	0	0
slit2	406	583	498	265.93	289	347	410	298
dhfr	26	23	27	24	54	85	53	30
wnt11f2	3	1	13	0	1	1	5	0
cul5b	16	20	24	9	15	17	18	11
tmed9	880	770	1128	820	759	830	878	637
cyp46a1.2	36	33	34	53	73.24	77.04	82.46	65.06
atl3	257	246	298	247	307	288	263	230
zgc:112496	83	50	81	54	81	94	58	49
seh1l	1073	1023	1374	985	822	975	1008	949
zgc:77375	35	33	48	17	39	16	26	26
hecw1b	0	0	1	0	0	0	3	0
ambp	3	0	0	0	0	0	0	0
irf2bpl	261	246	293	246	239	241	219	209
rhogb	10	24	22	8	24	7	16	11
slc45a1	0	0	0	0	0	0	0	0
vangl1	273	234	297	170	180	229	229	156
klhl18	86	66	83	62	67	71	73	62
lypd6	7	3	1	4	8	13	4	3
fam8a1b	129	117	178	99	124	140	114	80
ldlrap1a	34	16	61	26	29	31	33	29
cbwd	306	261	313	240	225	327	272	238
ush1ga	6.06	3.33	23.24	20.5	9.05	20.28	8.41	8.24
casp9	246	343	292	304	123	214	270	213
LIN28A	0	0	0	0	0	0	0	0
exoc4	483	396	504	381	311	375	541	428
nelfe	400	400	499	390	305	411	340	374
gnb3a	7	24	22	4	34	19	28	22
lhfpl6	28.07	24.19	29.02	18.01	23.51	60.01	45.6	30.63
fmnl3	59	116	53	108	64	76	98	117
ppp1r13ba	2512	2805	2492	2105	1926	2082	2523	2182
yrk	122	122	151	90	77	113	166	112
ELAPOR2	0	0	0	0	0	3	5	0
hdr	0	1	0	0	0	0	0	0
b3gnt5b	0	0	0	0	0	0	0	0
elovl6	175	185	277	175	123	102	267	176
snx10a	1	0	0	0	0	0	0	0
spra	687	483	956	323	436	474	463	350
tcf7l2	244	242	335	194	242	212	236	171
dpy30	231	221	277	219	225	271	211	217
btk	0	2	6	0	0	0	0	0
fam92a1	53	62	85	56	74	81	70	54
grm5a	28.4	22.92	37.49	9.43	16.85	30.39	31.59	11.76
aplnr2	14	3	16	8	22	21	14	15
tnfrsfa	186	152	176	83	88	109	169	121
tardbpl	1258	1080	1333	993	1120	1336	1189	1049
p2rx5	1	4	0	5	10	15	8	2
unc119.2	0	1	3	2	0	3	0	0
desi2	78	49	77	57	70	72	44	84
prkcsh	990.02	732	939	674.94	823	827	851.38	808
atat1	41	44	56	47	44	28	17	37
tbx21	0	1	0	0	0	0	0	0
pcyt1ab	116	78	205	108	97	157	114	141
tspan33a	8	3	3	0	4	9	5	0
xkr8.1	0	0	0	0	1	0	1	0
rcor3	48	58	50	41	30	41	45	48
ppat	144.86	105.92	131.61	73.52	93.74	60.44	72.31	58.29
C2H1orf35	232	216	304	187	164	269	188	144
pin4	392	311	386	370	369	416	404	396
zgc:173742	6	6	1	0	1	0	2	4
kmt2a	1743	1943	1643	1293	1455	1689	1611	1311
ptgs2a	919	658	1063	734	605	481	722	576
prkcg	0	0	0	0	0	0	0	3
gtf3c2	26	37	51	30	31	52	39	47
plk4	4	5	5	13	6	19	10	18
zgc:194665	0	0	4	0	2	0	0	0
nmnat2	0	0	0	0	0	0	0	0
sel1l	1222	1054	1270	782	1150	1330	1056	840
ntrk1	0	0	0	0	0	0	0	0
kat5a	257	311	313	253	169	212	217	193
sox4a	95	54	96	70	75	57	95.3	67
gpr22a	463	313	595	317	477	356	639	399
znf800a	132	125	165	83	98	119	109	71
lrrc4ba	0	1	2	0	0	0	0	0
or102-2	0	0	0	0	0	0	0	0
mtmr2	229	178	300	152	220	186	243	168
stx2a	14.53	6	12.7	13.38	2.08	4	12.47	2
gpm6ab	10	7	14	20	10	3	7	0
panx3	0	0	0	0	0	0	0	0
egln1b	346.99	272.67	322.36	187.62	304.54	270.58	254.28	224.15
epn3b	24	20	30	26	25	32	7	3
osbp	868	787	909	684	588	743	804	638
epha7	667	648	695	540	601	631	672	569
ccdc9	265	304	316	208	284	335	293	288
cdhr1a	7	1	0	2	9	6	4	3
spice1	9	16	10	0	3	12	6	4
kctd16a	0	0	0	0	0	0	0	0
zgc:101810	4	0	0	9	0	0	0	0
ptk2ab	1849	2004	2490	1631	1393	1796	1854	1503
dnajb6a	2049	1329	1777	1318	2380	2390	1923	1511
acaa1	280	154	214	134	171	209	244	176
nabp1a	36	15	35	18	61	59	55	45
six4a	1	0	2	0	0	0	0	0
eefsec	158	131	153	90	161	146	160	79
rxrgb	38	50	57	55	44	41	29	57
irf2bp2a	203	163	220	141	176	206	245	162
syf2	1042	934	1084	800	712	868	877	669
tbr1b	0	0	0	0	0	0	0	0
mad2l1	6	0	4	2	6	5	6	6
tcf12	1062	1101	1258	854	1077	951	1318	1074
mpp5b	0	0	1	0	1	0	0	0
tcea3	1555	1935	1576	1221	1339	1241	1176	1123
trappc11	419	331	505	263	407	525	487	460
hnrnpub	830	719	830	602	617	746	806	572
lmbr1l	271	243	234	124	175	220	179	216
zgc:100868	0	0	0	0	0	0	0	0
mylkb	10	54	12	4	13	20	35	30
hspa4a	1860.15	1557.39	2277.28	1429.76	1501.84	1943.81	1887.13	1354.16
ybx1	26911	25494	33127	22029	28050	31983	32414	26966
hhla2a.2	249	352	128	132	130	110	107	52
ankrd10b	79	55	77	86	64	72	58	64
wdr36	167	128	182	143	125	159	165	192
fgfr3	5538	5553	6135	4034	6013	5789	5878	4847
cops2	663	576	854	561	641	656	733	593
lrp1ba	2	6	1.01	9.15	1	6	3	0
ccdc146	0	0	12	4	0	0	0	0
mgrn1b	235.19	167	302.78	174	272.02	233.96	239.88	254.85
grwd1	233	153	259	150	183	200	232	185
asz1	0	0	0	0	0	0	0	0
flot2a	344	378	384	258	313	329	312	360
dnajc5ab	319	284	298	227	238	256	267	252
rassf1	32	17	29	28	33	14	37	34
foxp1a	196	177	166	120	162	143	162	139
hinfp	141	133	174	93	78	134	93	117
esrrga	4	3	38	3	46	44	34	29
foxr1	0	0	0	0	0	0	0	0
mindy1	285	243	386	231	211	238	249	278
penka	3	3	1	0	0	2	0	0
psen1	214	165	248	123	171	176	171	138
mst1rb	116	110	102	73	42	76	85	24
spata6l	5	1	3	7	1	6	2	2
tmc6b	48	66	63	63	80	127	64	29
rock2b	526.53	509.21	729.84	413.67	621.54	461.03	486.78	358.06
acsm3	3	1	8	8	8	14	2	0
aga	186	172	223	166	212	210	162	192
pex19	599	596	818	576	633	688	747	623
zp2l2	0	0	0	0	0	0	0	0
gys2	0	0	0	0	0	0	0	0
stip1	1084	876	1125	562	737	1031	1017	799
immp2l	33	33	35	17	34	30	22	23
lmo7a	46493	39996	48170	27503	34065	53830	34439	27872
slc8a3	1	0	9	0	1	0	4	11
anos1b	9	2	16	63	2	5	7	0
skp2	57	34	82	42	51	58	68	87
mtdhb	71	38	259	160	0	100	141	78
bccip	4377.61	4063.97	5031.89	4136.45	3880.66	4572.81	4081.15	3543.73
rsad2	49	34	1	0	0	0	0	0
mxb	9.22	16.99	0	0	0	0	0	0
grna	6	5	6	17	2	5	3	2
zmat2	465	364	515	376	426	491	405	396
cyp4t8	0	0	0	0	82	44	39	22
elovl5	110	103	110.88	61	108.99	102.13	171	133.47
ppp3ca	0	1	0	0	0	0	0	0
brf1b	105	104	170	87	117	124	116	84
slc5a12	0	0	4	0	0	0	0	0
si:dkeyp-2e4.8	21	10	25	16	23	15	24	11
tspy	276	339	295	260	256	259	302	266
fkbp9	496	490	547	374	340	355	336	378
tshz1	204	210	336	209	232	294	264	243
crppa	732	759	917	722	495	567	691	584
rab20	56	50.87	56	43	65	43	25	39
wnt2ba	358	263	260	163	366	284	280	196
dimt1l	86	72	90	47	71	65	97	86
ncapd2	31	17	51	32	67	35	27	45
eif4e3	853	830	1612	1074	720	899	876	672
ggctb	51030	48507	51428.1	36207	47786	63138.2	49527.1	42100.9
cep89	17	10	31	14	10	11	24	7
glcea	10	8	6	1	2	3	3	0
zgc:86764	2	2	7	5	5	10	3	7
limk2	1747	1692	2050	1512	1577	1922	1963	1457
oclna	0	0	0	0	0	0	0	3
cdh17	0	0	2	0	0	0	0	0
calub	676	451	605	465	489	480	608	519
atp2a2b	494	426	492	321	346	361	435	361
large1	104	60	93	92	56	83	61	46
rnaseh2b	40	42	65	33	48	58	30	34
psmd11b	631.09	533	731.04	573.62	536	679	727	598
hhatlb	2	5	0	0	3	3	3	7
camkvb	2	1	0	0	0	0	0	0
tbx20	0	0	0	0	0	0	0	0
aspa	11	20	32	11	35	58	54	40
cyth1a	186	267	203.82	157.86	153.12	181	202.13	156
tpm3	986.71	761	986.31	632	736	772	823.44	689
efr3a	147	95	109	64	96	108	114	118
dynll2b	770	707	1158	858	374	450	683	434
zgc:101040	1	1	1	0	2	6	4	8
dglucy	108	47	51	27	187	254	302	193
cpn1	0	10	0	0	0	10	0	3
sp4	199	275	256	176	233	235	249	182
ahcy	322	266	364	254	375	296	337	318
coro2a	24	26	37	19	32	24	17	26
zgc:158328	0	5	0	4	0	0	0	0
wrnip1	125	131	137	90	99	137	108	85
pdcd6	78	70	86	69	82	57	78	90
desmb	0	0	1	0	0	0	0	0
ssr2	591	440	625	340	536	577	629	539
ccdc85ca	178	158	176	125	107	127	193	132
srcap	796	708	915	687	759	714	850	738
asb3	110	78	110	83	81	140	93	120
rpe	292	268	374	241	297	317	314	315
kdelr2a	1484	1215	1533	1128	1029	1212	1221	1137
zc3h12a	2	0	5	4	2	7	8	7
rad52	0	1	3	0	6	1	2	0
fbxl15	144	104	185	125	143	175	118	120
CALHM1	1	0	0	0	0	0	0	0
celf1	9487	9572	12000	9305	10106	11858	10329	8851
stam2	346	439	463	287	352	351	445	374
nipsnap1	0	0	0	0	0	0	0	0
ftr66	1	0	0	0	0	0	0	0
lipib	0	0	0	0	0	0	0	0
slc22a4	0	2	0	6	0	0	0	0
ccdc85al	1	0	0	0	1	0	0	0
dip2ba	1261	1043	1386	1015	825	840	1234	932
larp6a	329	264	294	179	249	282	322	246
tyro3	234.9	258.74	271	189.65	199.71	260	186	285
sucla2	1269	1013	1246	811	813	910	1147	871
grin3ba	0	1	0	0	4	0	0	0
mcamb	1	5	10	3	13	8	17	7
gprc6a	0	0	0	0	0	0	0	0
camk4	3	1	6	2	0	0	0	2
tubgcp4	234.71	178.56	244.83	154.87	217.06	288.2	250.63	181.25
prdm9	220	201	248	154	198	240	206	184
slc5a5	0	0	1	0	5	1	0	3
dnmt3aa	61	66	59	55	43	50	65	59
trim3b	708	767	603	429	631	583	634	443
grapa	76	56	78	50	54	47	70	83
map3k5	265	242.01	293	215	267	306.06	241	223
pgam1a	916	622	1006	627	901	864	952	780
wdfy1	105	104	139	110	103	142	123	79
mtfmt	173	166	189	116	149	210	192	144
gdi2	3187	2842	3393	2231	2728	2739	2914	2489
foxp2	13	20	19	10	15	8	13	4
tacc3	12	14	28	18	21	20	26	27
katnb1	434	378	457	327	342	397	445	368
csnk1g2a	971	904	998	671	748	953	1029	715
kif4	34	38	52	29	47	52	43	45
slc30a1a	432.25	431.36	610.67	334.15	584.11	530.46	599.19	431.59
dnase1l1	21	10	1	2	9	1	1	5
irf2bp1	276	211	279	176	255	231	292	238
nav3	93	94	58	59	41	46	86	63
tenm3	286	300	354	239	240	274	281	244
nfkbiaa	8	2	6	5	7	8	6	4
rapgef2	845	776	951	569	751	648	730	722
ucmab	1.89	14.77	0	0	0	0	0	0
dgcr6	136	105	145	132	96	127	135	91
gdf6b	0	0	0	0	0	0	0	0
naca	25841	22302	20942.9	17390	20429	23785	20148	17994
slc5a9	32	16	24	20	28	20	29	28
galr1a	0	0	0	0	0	0	0	0
acy3.2	2	4	0.84	7	3	0	7	2
igfn1.1	0	2	1	0	0	2	0	8
ubr7	1004	766	972	718	810	1029	890	710
xpo7	2493	3204	2651	3422	2324	3415	3954	4488
wif1	14	49	70	8	533	465	256	28
btbd3a	160	132	150	117	125	143	146	115
rint1	217	155	319	164	223	281	323	228
znf710b	614	611	751	498	617	671	650	442
hnrnph1l	353	334	451	356	359	392.05	515	448
pou4f1	0	0	0	0	0	1	0	0
ywhah	653	625	877	594	657	637	651	662
gfm2	141	133	70	67	183	144	137	85
entpd8	1	0	0	5	0	0	0	2
vsx2	6	13	1	0	0	2	0	4
mphosph8	2945	2598	4065	2772	2706	3726	3378	2653
ugp2a	107	76	120	57	88	88	92	76
zbtb20	113	102	81	110	83	85	101	58
mtf2	90	121	154	87	88	90	128	127
adgb	74	84	76	79	33	51	39	26
paxip1	161	149	209	145	134	141	163	146
aph1b	425	377	500	391	283	292	360	302
bfb	0	0	0	1	0	0	0	0
nek2	25.75	21.64	47.33	31.85	27.89	16.54	22.81	14.41
maco1a	122	130	155	115	82	97	96	91
0	9	14	9	17	8	22	23	22
zmp:0000000527	3	0	0	4	0	0	0	0
smyd2b	12.02	8	13	12	15	22	12	8
adat3	40	29	50	21	42	28	33	19
gcat	369	408	356	302	342	406	329	294
robo3	44	50	45	60	39	65	33	21
olfml2a	3	0	0	0	0	0	0	0
hrasb	164	108	104	57	165	104	106	127
man1a1	70	77.99	119	57	61	67	40	53.37
ttbk2a	100	75	116	94	95	62	65	71
f3b	14	19	9	5	16	5	6	4
sec61a1l	369	292	322	265	282	288	260	237
trip10a	420.08	387.77	523.99	336	380.33	281.99	329	393.95
slc25a23a	26	20	28	21	52	48	32	44
ddx19	471.24	405.88	601.62	395.29	403.24	451.72	511.15	396.72
eps8l3b	0	0	0	0	0	0	0	0
ethe1	67	46	97	55	74	65	69	68
olfml2ba	2	2	1	0	0	0	4	0
rpf1	203	166	235	158	203	191	200	160
gpm6ba	2	9.02	0	0	0	0	1	5
cand2	0	1	0	0	0	0	0	0
ptprfb	781	785	876	658	673	688	637	509
col14a1a	136	120	186	136	109	93	199	115
tsr2	126	98	107	67	143	127	137	82
ddx3xb	2841	3181	3965	2915	2826	3065	3626	3559
scn8aa	6	0	3	1	0	0	0	0
guk1b	0	0	0	0	0	3	0	1
npy8br	3	1	0	0	3	0	1	0
ncanb	0	2	0	0	4	3	0	2
ppm1f	62	45	33	34	72	103	94	42
enpp1	18	16	23	10	33	14	25	28
rpl28	7249	6168	6285	5166	5645	6720	5729	4880
smim14	2021	1681	2199	1244	1616	1998	1849	1606
ampd3a	0	0	0	5	0	0	0	0
klhl10a	1	0	12	30	0	0	10	3
ncf2	0	5.04	7.09	0	0	1.34	2.76	3.29
slc39a10	209	224	287	186	168	207	217	181
eif2s1a	787	604	880	756	693	822	766	696
faima	47.84	32.79	29.39	31.8	33.33	32.8	33.63	32.93
gatad2b	111	117	121	55	104	102	100	85
got2b	845	834	1009	749	658	784	727	620
tnni2a.2	55.2	71.94	71.45	62.98	47.7	52.61	62.16	52.58
cd9a	2	3	2	0	0	3	0	0
0	0	0	0	0	0	0	0	0
slc25a6	107	60	34	24	48	49	55	55
ralgapa2	129	75	98	53	76	88	52	67
or131-1	0	0	0	0	0	0	0	0
gon4l	436	422	463	368	377	407	443	384
mmadhc	249	208	243	131	193	241	157	165
rfx1a	58	75	68	63	53	79	53	56
cyb5r3	458	373	539	381	383	464	444	373
slc7a9	4	0	5	4	0	0	2	0
dera	110	94	103	46	103	118	107	113
clk4b	61	54	89	42	65	64	25	66
tgm1l3	57	32	0	4	6	3	9	12
tcf3a	146	147	156	121	142	114	123	109
srpk3	61	69	111	39	84	93	97	93
serpina10a	6473.98	5743	6275.82	4607	3790.9	5022.99	4368.87	3648.99
ak2	1267	1014	1246	757	986	1384	1164	698
tbc1d17	578	352	720	431	407	480	434	349
clul1	482	436	527	328	367	422	497	462.89
vmn2r1	0	0	0	0	0	0	0	0
htra4	2	0	2	0	4	0	0	0
sart1	2214	1962	2622	1797	2142	2772	2238	1830
ankmy2a	140	149	163	121	143	123	120	156
ric8b	1052	858	2970	2040	203	209	326	230
sfswap	483	449	1044	611	628	769	589	603
rgl1	1746	1607	1791	1310	1638	2030	2033	1776
prc1b	4	9	14	10	11	0	7	20
mycla	14	11	17	12	2	8	4	13
dct	0	0	0	0	1	2	0	2
bmi1a	38	28	42	37	49	47	51	41
klhl42	114	97	104	58	80	101	109	92
tktb	4361	3743	5374	3639	3404	3555	4478	3721
tp53i11b	0	4	0	3.21	0	3	0	1.98
lta4h	63	35	70	39	54	45	61	53
abat	293	215	310	201	319	317	262	287
aebp2	269	233	322	226	250	233	201	265
cyp20a1	342	277	328	186	246	268	254	255
usta	61	46	63	40	61	57	36	31
malt2	0	0	0	0	0	0	0	0
crybg1b	259	126	517	201	240	192	372	145
akap1b	416	304	394	268	361	396	300	315
znf385b	0	0	0	0	0	0	2	0
uck2a	234	196	262	244	147	143	220	165
gpr37l1a	0	0	4	1	0	0	0	1
rad21a	1676	1545	1889	1197	1556	1631	1619	1305
cdk15	0	1	3	0	0	4	0	2
igf2r	393	282	489	269	346	277	386	210
pimr185	1	2	5	5	0	0	0	0
chrd	0	0	3	0	0	0	7	1
myof	13	11	20	21	13	9	5	11
tbx2b	3	5	13	3	5	17	14	3
kdm5c	1303	1446	1451	1179	1071	1549	1631	1545
csnk1db	1279	1077	1296	869	1197	1112	1200	1162
cep170aa	431	485	558	435	457	456	460	418
star	0	0	0	0	0	0	3	0
pde11al	2	1	5	0	0	0	0	0
lrrk2	357.56	318.97	391.76	253.56	303.61	330.49	269.3	281
lrrc23	4	1	1	0	0	0	0	0
hif1aa	0	0	0	0	0	0	0	0
gatad2ab	207	235	311	174	255	233	231	161
sav1	2286	2351	2495	1867	1874	2300	2170	1638
eif4g1a	3965	3647	4683	3047	3031	3402	3948	3625
erbb3a	0	0	0	1	2	3	0	0
pou4f3	0	0	0	0	0	0	0	0
gpx1b	0	0	1	0	0	0	0	0
akr1b1.1	2130.48	1288.6	3046.38	1846.24	1815.44	3830.08	3512.94	1063.26
gnl3	432	257	449	304	359	441	427	437
ugt1a1	2	0	2	5	0	0	0	0
ddx39aa	379	342	373	238	247	329	266	219
brms1la	140	126	191	122	128	144	149	145
slc27a1a	699	641	881	567	690	717	734	667
ptp4a1	2030.75	2177.22	2431.65	1671.77	1486.01	2030.85	1639.25	1576.39
ell2	1823	1581	2367	1273	1680	1792	2455	1733
mier3a	190	191	220	180	170	191	183	170
vldlr	0	0	8	17	4	8	13	29
tuba8l4	9620.95	8451.8	11106.6	7549.28	7846.95	8635.89	11849.9	9588.38
stat1a	2487	1918	1683	1545	1290	1261	1259	1108
mpp5a	236	183	240	156	185	171	253	145
rragd	35	21	34	14	60	48	46	60
waslb	213	222	481	253	314	379	389	257
prdm5	64	65	94	50	74	73	67	45
ndufs5	925	864	1088	730	804	1016	900	676
maats1	0	0	0	3	0	7	0	0
arhgef7a	93	81	136	63	97	77	83	85
psmd9	440	478	641	454	509	558	515	484
wu:fj59g11	146	156	177	117	176	110	204	188
shisa4	50	43	65	47	82	82	56	39
ptpn18	0	0	1	0	0	5	0	0
itgav	5612	4263	5549	3995	4166	4889	5477	4215
rpl23a	11134	9404	10419	7877	9366	11482	9669	8219
snx14	1389	1417	1849	1252	1210	1392	1510	988
tas1r3	0	0	1	0	0	0	0	0
med17	82	91	103	90	112	84	89	92
nkx1.2la	0	0	0	0	0	0	0	0
itga5	1	2	2	0	1	2	0	0
slc18a3a	0	0	0	0	0	0	0	0
crlf1b	1	0	2	0	3	1	1	3
atp6v1h	328	289	414	329	306	368	290	291
ugt5c2	15	10	15	7	6	13	17	8
stxbp5l	1	1	6	1	0	1	5	0
triobpb	303	299.01	292	204	249	278	274	258.77
smad2	471	433	538	309	368	441	428	377
exosc9	143	103	154	132	116	186	108	139
rbm25b	555	521	637	430	506	724	562	547
nrcama	1113	1017	812	631	518	374	786	797
laptm4a	3110	2905	3290	2350	2448	2884	2771	2319
ywhae1	4067	4144	4546	3358	3666	3837	4051	3572
hmgb3b	318	261	325	233	300	367	268	295
mapk12b	0	0	0	0	0	0	0	0
rpl38	4657	3536	4150	3283.42	4034	4784.99	4414	3594
atrnl1b	456	473	591	354	385	424	504	450
esyt3	3	0	1	0	0	0	0	0
fabp2	0	1	0	0	0	0	0	0
polr1e	173	142	215	194	156	199	207	171
slc19a3a	0	1.03	0	2.02	1	0	1	0
pdgfrl	669	579	977	535	559	659	809	604
pcdh8	1	0	0	1	1	1	0	0
grap2a	0	0	0	0	0	1	0	2
saxo2	3	2	2	7	4	0	1	4
ddi2	269	246	282	255	224	269	243	223
anp32a	1240	1258	1220	971	1368	1416	1194	1028
agpat9l	0	0	0	0	0	0	0	0
asb7	114	147	171	115	83	122	157	102
rtn1a	2032	2032	2192	1515	1525	1615	1862	1611
cyp2x10.2	0	0	0	0	0	0	0	0
pip5k1bb	6	6	8	6	13	13	4	6
her6	233	259	331	151	231	232	294	242
otop2	0	1	1	1	0	0	5	5
supt6h	1423	1437	1611	1198	1360	1455	1534	1250
fn1b	121	104	156	152	15	92	11	26
brd3a	377	287	421	214	431	595	407	370
c1qtnf6b	0	1	0	1	0	2	0	1
rgp1	194	152	196	134	172	175	190	148
ak4	731	673	665	543	841	929	703	537
rras	396	316	417	255	347	336	351	285
irf4a	0	0	0	2	1	0	0	0
nlk1	326	293	326	236	365	410	320	340
dus4l	124	71	87	67	71	93	104	81
kcnmb2	0	0	0	0	0	0	0	0
nadka	9	14	26	20	17	13	21	19
cldnd	0	0	0	0	0	0	0	0
phf8	435	430	529	333	416	414	427	331
DMWD	159.55	127.72	198.1	116.11	145.19	144.41	140.65	157.3
zgc:111983	0	0	0	0	0	0	0	0
sgk2b	0	0	0	0	0	0	0	0
lsm14aa	992	928	978	673	847	887	900	726
kaznb	563	520	584	427	472	516	494	441
chrna2a	1	0	0	0	0	0	0	0
csrp1a	346.25	267	327.66	131.74	287.11	267	265.68	186.03
nectin3b	134	133	119	92	102	96	62	105
gpr27	6	2	3	0	0	0	6	1
map2k2a	988	749	921	490	794	902	844	602
hnf1ba	0	0	0	0	0	0	0	0
napga	122	115	149	95	85	120	113	101
pspc1	223	189	226	134	197	193	217	195
ppp2r2ab	277	253	314	210	221	258	220	233
slitrk2	27	14	14	23	23	18	15	22
lnpk	176	174	294.48	211.97	184.01	193.84	177	161.93
eomesa	0	0	0	0	0	0	0	0
drg2	2477	2902	2748	1952	2015	2891	2288	1646
bud13	181	198	214	178	188	167	260	168
fam49a	891	602	781	634	631	652	817	474
ripk1l	109	116	152	94	129	153	134	136
pth2ra	0	2	3	0	2	0	0	7
arhgef6	498	438.07	537.81	322	431.15	451.68	507.61	407
rpl12	26083	20460	27650	19049	21355	31748	21312	17984
wipf2b	146	149	141	110	131	112	109	104
specc1la	2314	2132	2295	1448	1924	1920	2146	1915
tmem178b	21	12.98	26.24	19	15	18.24	14.5	10.16
mllt3	362	419	448	329	302	367	342	352
klhl41b	0	5	1	0	0	0	0	0
fam234b	264.31	261.01	260.07	207	204.62	241	258.48	207
slc24a3	530	461	513	438	435	500	497	521
snd1	923	810	843	614	698	761	762	685
elovl4a	2	0	5	0	2	0	2	0
cass4	2	1	7	10	3	0	3	6
rb1	25	17	32	51	25	51	31	25
copz2	307	298	369.08	193	302.17	456.33	333.11	222.96
arntl1a	110	117	121	154	45	111	62	88
nt5dc1	36	22	37	24	29	20	24	5
sult1st6	624	519	589	403	627	504	632	495
wdr26b	1139	1205	1340	991	1170	1413	1340	1109
gtf2f2b	0	0	0	0	0	0	0	0
urod	175	141	205	158	160	172	182	131
galnt9	0	1	2	2	0	0	0	0
mycn	1128	1149	1284	808	863	782	1139	823
eef1a2	0	0	2	0	0	0	0	0
gnmt	370	143	254	92	143	126	276	168
parp9	45.16	23.21	42.61	26.2	30.67	40.2	23.37	32.07
asic2	47	36	62	31	53	36	8	13
nkain1	116.68	129.57	115.13	130.97	113.01	142.12	112.41	65.09
kifap3b	389	352	418	337	340	326	463	396
si:ch1073-349o24.2	2	2	4	2	4	0	0	2
glra4a	0	1	0	0	0	0	2	1
trh	6	10	20	6	16	27	19	17
stx17	84	54	88	54	110	125	104	102
enpp4	20	28	25	16	17	17	14	8
phf21aa	9	26	13.92	15.42	16	13	18	32.2
mpped2a	286	273	335	143	328	284	268	274
kcns3a	0	0	0	0	0	0	0	0
myo3b	208	138	247	192	410	517	800	751
oprk1	0	0	0	0	0	0	0	0
lhx6	2	0	2	0	0	0	0	0
far1	372	281	338	145	352	337	509	416
impdh2	73	50	74	40	58	43	61	60
si:ch1073-459j12.1	8	25	4	3	0	6	8	1
wnt8b	0	0	0	0	0	0	0	0
arl8ba	274	280	352	267	278	297	312	276
lrp5	414.14	410.29	505.68	367.99	325.44	286.91	374.65	319.24
cacna1ab	5	12	16	18	4	12	1	8
fbxo38	241	190	279	162	238	323	265	211
tbx16l	1	0	1	0	0	0	0	0
gdpd3b	1	0	1	0	0	0	0	0
cse1l	556.09	448.94	616.47	512	414	480.93	573.07	437.71
zak	1305	1100	1152	768	3382	4328	4503	3551
ccdc113	116	148	161	122	41	51	59	57
celf3b	7	7	10	3	4	13	4	3
creld1b	393	351	380	339	308	486	440	316
hoxa11b	0	0	0	0	0	0	0	0
ms4a17a.6	0	0	0	0	0	0	0	0
uox	0	0	1	4	0	2	1	5
ttc9c	77	80	112	83	105	90	109	68
hnrpkl	464	447	548	398	356	295	406	313
tmigd1	0	0	0	0	0	0	0	0
cnot4a	837	862	1014	569	817	768	882	618
mrps18b	908	918	1066	755	832	1106	1038	817
si:dkey-19a16.16	0	0	0	0	0	0	0	0
ankrd50l	0	0	2	0	1	0	0	0
rhcgl1	0	0	0	0	0	0	0	0
pias4a	313	318	318	253	222	256	314	228
aqp10a	0	0	0	0	0	0	0	0
xab2	213	170	213	137	180	209	164	176
her13	1	0	4	0	0	5	0	0
itm2ba	21630	18556	17279	11738	11005	10798	17086	12789
cx43.4	3	2	8	0	2	4	2	3
lipia	0	0	1	0	1	0	0	3
asb6	42	32	45	29	34	79	52	42
acat2	221	213	287	158	242	234	313	267
slc6a16a	777	531	398	231	416	316	504	382
mrto4	149.88	104.72	151.13	81.35	129.4	139.63	202.21	132.69
cnot3a	1470	1438	2057	1385	1221	1691	1751	1450
gtf2h4	517.01	463.37	650.55	414	431.62	458.4	361.44	399.02
psmc3	1821	1567	2201	1510	1334	1659	1684	1467
l1cama	0	0	0	0	0	0	3	2
kcnk2b	0	0	0	0	0	0	0	0
itgb1bp1	242	223	283	289	203	243	220	230
aig1	0	1	0	0	2	1	0	0
plxna3	37	92	66	61	23	12	50	20
recql	216	157	216	147	157	195	190	145
sash1a	1272	1342	1613	1057	1223	1186	1360	1030
slc30a4	478	547	571	353	459	527	533	404
nadk2	454	381	495	448	416	498	474	419
zbtb16a	248	65	74	35	83	69	146	79
ppp1r8a	38	38	62	37	55	46	64	45
grm2b	0	0	0	1.06	0	0	0	0
rae1	204	199	241	164	184	182	184	198
mta1	124	93	123	79	80	131	95	84
CR846090.1	0	1	0	1	0	0	0	0
cnpy2	59	27	69	55	36	76	81	33
abce1	1598	1060	1817	1378	779	1097	1361	1182
wdr55	81	54	74	61	86	100	112	76
actn1	388.51	382.84	522.35	362.93	304.83	369	261.42	300.32
ncam1b	1	0	3	0	6	7	3	1
pbk	3	0	5	16	10	8	7	3
ryk	1100	1107	1414	1062	968	932	841	839
mycb	515	505	607	503	426	448	448	418
acp2	289	244	433	348	152	194	403	138
rundc3aa	0	1	5	0	0	1	0	0
ric8a	776	692	1009	731	769	865	838	603
use1	74	60	91	86	76	119	151	93
rab5ab	377	293	407	282	298	316	362	278
nipsnap2	99	93	101	87	88	121	96	112
mynn	272	225	294	221	219	269	196	269
si:ch211-251b21.1	23	69	12	0	7	26	18	7
ela3l	0	0	0	0	0	0	0	0
myf5	63	49	96	42	71	60	72	85
ect2	82.62	66.37	94.43	72.21	57.91	57.46	70.19	32.52
yipf5	259	239	318	154	138	123	238	140
mrpl57	213	220	238	200	273	258	225	204
metrnlb	1	2	0	0	0	0	1	0
aco2	932	731	940	655	816	910	1037	846
sh3gl3b	42	30	45.21	26.83	27	52.24	68.09	29.14
tmpoa	213	190	238	146	236	255	249	192
rpl7	16481	13399	14263	12260	12721	15319	14276	12118
chmp4bb	607	599	792	556	473	468	583	504
tbx16	1	1	6	1	1	1	2	1
tcap	0	0	0	0	0	0	0	0
degs1	164	162	178	113	145	157	187	127
dmrt1	7	12	18	3	11	0	23	3
fgf20a	0	0	0	0	0	0	0	0
cxcr3.1	0	0	0	0	0	0	0	0
UBL4A	235	225	271	250	208	200	224	237
sft2d1	415.05	365.92	445.81	320.08	375.23	329.05	351.03	336.42
AMDHD1	0	0	2.1	2.03	0	0	0	1.04
tcf7l1b	588	545.62	643.2	332.61	481.46	491	569.81	535.55
dysf	2085	2040.38	2845.2	1790.36	2004.59	2082.23	2498.41	1744.55
slc26a3.1	0	0	0	0	0	0	0	0
odc1	460	463	727	476	314	323	659	470
ubtd1a	1	1	9	3	14	17	6	18
kcnk6	29	15	29	28	11	22	27	20
cct7	4008	3001	4227	2927	3757	4357	3996	3288
irf2a	141.04	134.43	154.6	91.76	96.5	169.53	147.42	124.97
rnd3b	0	0	1	0	8	1	0	0
lrrk1	26	20	6	13	9	10	18	14
strap	1108	854	1152	805	1078	1201	1012	778
phox2a	5	6	9	0	10	4	80	39
barx1	1	1	0	0	0	0	0	1
ppifa	95	66	73	56	57	49	45	81
slc2a1b	1201	1057	991	570	979	932	1335	902
arid2	503	624	692	446	482	645	651	393
chmp4c	0	0	0	0	0	0	0	0
ftcd	0	0	0	0	5	2	0	0
apol1	45	42	51	60	45	43	34	26
ndor1	181	117	217	188	157	221	181	160
prdm12b	0	0	0	0	0	0	0	0
avpr2aa	0	0	0	0	0	0	0	0
ube2ib	719	627	845	665	562	789	694	538
fbxl18	33	38	47	40	44	52	65	33
ift81	82	87	103	47	77	115	96	90
slc25a39	152	153	172	129	151	123	164	147
srgap1a	118	88	129	96	87	78	116	98
tdrd1	0	0	5	3	0	0	0	0
ifit10	1	2	0	0	0	0	0	0
fbxo8	92	116	148	96	103	131	147	81
rpe65a	0	0	0	0	2	0	1	0
epc2	292	372	411	228	317	295	344	306
adrb1	0	0	0	0	1	0	0	0
st3gal8	90	70	97	51	67	73	76	50
ufl1	220	251	309	162	200	256	236	184
kmt2e	570	598	678	411	528	503	531	527
ndufs2	992	804	952	654	805	859	779	833
zcchc9	177	172	234	146	161	191	164	146
itln1	0	0	0	0	0	0	0	0
opn4.1	0	0	0	0	9	0	0	0
sema3bl	25	24	20	25	26	24	13	10
cdh23	117	94	246	162	351	231	233	90
appbp2	640	586	773	517	537	738	640	621
crybb1l1	55278	58044	66753.2	62481	45579.9	51009.1	59102	59737.6
olfcb1	0	0	0	0	0	0	0	0
bloc1s4	241	227	275	215	203	237	170	178
zmynd8	470	479	482	384	462	434	431	368
stxbp2	125	130	129	51	94	77	87	87
wwox	45	32	59	34	62	56	53	37
gins1	65	36	41	58	32	34	25	19
mkrn2	331.59	351.42	401.68	340.94	297.24	323.21	370.19	314.67
cnot4b	284	304	501	325	381	366	398	387
nsfa	2	2	4	0	0	8	0	5
crybb1l3	40978.5	40077.8	46841.9	38521	41918.6	46037.3	45208.2	37437.1
ccnh	152	144	165	124	151	144	186	150
amph	0	0	1	0	0	0	0	0
ghrb	306	480	318	308	10	15	185	149
ttyh3b	100	94	129	69	96	100	119	112
ppdpfa	66	139	90	36	89	163	160	173
cul1b	190	192	214	190	187	222	256	201
nfkbiab	362	301	329	244	296	397	378	351
fabp7a	0	5	0	0	0	0	0	0
nsa2	7530	7014	7908	5545	6529	7769	6399	5268
adamts8a	2	0	1	2	3	0	0	0
rab3il1	341	294	224	195	148	170	119	190
lgsn	300290	286553	281123	191470	219928	337727	242243	193900
sub1b	1045	1083	1306	909	928	1197	1056	985
nudt8	53	57	71	48	52	47	55	57
efnb1	258	219	301	216	231	240	220	291
rgl2	12	6	14	6	9	10	18	1
stn1	54	54	146	101	65	44	56	84
zyg11	318	293	403	283	325	294	346	251
atp1a1a.2	5	0	106.07	83	0	0	26	17
il15l	66	60	93	50	25	22	53	33
tsr1	485	406	631	390	504	481	531	437
uqcrfs1	1364	1013	1383	862	1042	1154	1013	992
lmnl3	3	3	1.99	0	2	1	0	0
cpne2	98	122	122	90	16	17	94	46
wdr61	425	374	385	330	266	447	317	241
spg21	245	225	296	228	167	223	244	177
klhdc10	372	328	474	270	349	499	490	376
sult5a1	0	0	0	0	0	0	0	0
vash2	36	56	48	62	41	26	40	55
blk	1	0	0	0	3	4	0	1
tmx2b	274.45	302.86	309.23	205.17	332.29	319.79	285.9	231.03
zgc:112965	0	0	0	0	0	0	0	0
atp2b1b	2	6	3	0	2	3	0	4
ppp2r1ba	1483	1351	1660	1126	1347	1540	1357	1243
cst3	2805	2886	2933	2484	2750	2923	2868	2333
gas6	3304	2691	2153	1379	2586	2523	2503	2653
cyth3a	75	43	62	30	39	79	45	50
zdhhc16a	200.79	111.42	187.72	121.76	168.03	217.85	210.5	165.5
sp3b	280	233	309	153	280	289	309	213
rnpepl1	163	179	437	271	296	366	318	277
palm1b	679	693	721	588	660	575	799	671
atf3	26	32	25	39	43	45	34	34
camta1b	6	5	6	6	5	15	0	2
map2k1	327	274	425	334	365	377	383	235
ctsla	2049	1331	2039	1312	1395	1747	1316	1261
MCHR2	0	0	0	0	0	0	0	0
rtn4rl1a	4	2	24	3	6	11	22	7
tra2a	297	251	312.68	222.01	261	274	238	177.97
pimr195	0	0	0	0	0	0	0	0
dazap2	957	886	966	692	742	775	887	726
ehd3	1159	1241	1316	816	1377	1631	1431	1157
fancl	16.02	9.38	12.97	5.52	15.46	6.26	17.34	11.96
slc35b2	170	128	212.19	131	83	156	178	129
meox1	0	0	0	0	0	0	0	0
pdcd2	64	54.8	71.95	32.5	59	50.59	63	45
crnkl1	838	797	938	691	464	576	761	556
lrp2b	0	1	0	0	0	0	0	0
si:ch211-196i2.1	36	23	17	18	0	0	1	8
xpnpep3	50	41	47	25	37	43	51	46
ttc27	115	84	117	106	125	126	98	100
ptpn1	96	70	100	65	52	96	76	81
hmx4	2607	2212	2608	1644	2295	2187	2492	2066
gabpb2a	307	260	271.04	190	151	151	166	123
lhx1b	0	0	0	0	0	0	0	0
itga11b	11	8	5	6	18	9	1	14
iars1	985	624	1055	651	777	777	868	753
hibadhb	366	334	360	269	320	347	374	328
hnrnpaba	3581	3107	3800	2550	3428	3225	3490	3001.22
cks1b	14	5	12	0	9	11	19	28
fth1b	8	16	27	8	79.36	62	41	17
si:ch211-220f16.2	646	551	831	575	764	832	787	675
onecut1	2	4	15	0	5	2	2	2
masp2	0	0	1	0	0	0	0	0
nedd8	915	675	886	628	662	1019	704	570
wt1b	3	0	5	0	6	0	4	4
pou2f1b	214	208	236	164	152	173	176	198
zgc:194189	0	0	1	4	3	0	0	0
nudt17	328	337	423	361	323	422	369	349
mxg	1	0	0	0	0	0	0	0
med31	261	280	249	203	282	357	293	223
kif18a	3	7	7	1	12	4	10	14
niban2b	52	17	105	27	232	199	115	108.78
mep1a.2	0	0	0	0	0	0	0	0
myl9b	2043	1577	2968	1787	2523	2085	4056	3078
sart3	1157.13	961.06	900.31	528.03	1346.19	1437.13	1250.22	1137.1
skib	409	449	559	323	448	396	506	336
si:dkey-42i9.4	103	97	101	87	86	90	82	53
scara3	270	225	349	147	250	237	425	217
tma16	180	106	148	135	137	146	134	130
illr4	0	2	0	0	0	0	0	1
olfcd1	0	0	0	0	0	0	0	0
srsf9	186	135	235	156	160	182	130	77
ifit9	2	1	0	2	0	0	0	0
slc7a10a	51	72	27	22	14	24	42	39
mettl2a	215	185	288	223	198	265	207	203
src	1	4	1	0	0	0	1	2
si:ch211-195d17.2	571	530	657	539	451	438	466	375
pcdh15b	10	2	24	13	0	0	5	2
sox1b	2411	2566	2539	1780	2417	2628	2457	2072
foxl1	0	0	0	0	0	0	0	0
kcnab1a	118	180	127	129	126	143	322	364
rbl1	104	101	126	107	63	85	77	75
stxbp3	500	468	571	349	431	584	372	343
serinc5	559	552	436	406	554	788	648	683
sms	1137	1313	1925	1557	1574	1348	1876	1073
btr33	0	0	0	0	0	2	0	0
caspa	0	0	0	0	0	0	0	0
dbnla	0	0	0	0	0	0	0	0
hoxb1a	0	0	0	0	0	0	0	0
si:ch73-111e15.1	0	0	0	0	0	0	0	0
mia3	1238	1207	1470	915	1182	1219	1324	1155
syk	0	0	0	0	0	0	0	0
sf1	612	607	774	449	620	517	638	646
tmeff1a	47	47	59	22	44	32	57	40
pank1a	669	619	601	362	616	622	700	697
ugp2b	194	152	189	133	144	176	124	119
pax1a	0	0	0	0	0	0	0	0
myt1la	0	1	1	0	0	8	0	6
kcnk13a	0	0	0	0	0	0	0	1
znf410	1000	922	1054	914	835	1055	917	724
crygm4	90283	137206	107564	116608	56788	72977	102155	111119
vps35	784	517	870	502	687	668	765	621
cog5	193	197	220	113	112	118	160	102
sars1	1682	1017	1796	1368	970	1134	1096	1136
manba	45	37	54.03	17	23	34	13	28
mocs3	63	55	69	31	73	73	78	43
cct8	4136	3490	3773	2663	2927	3838	3139	2693
vezf1a	39	33	32	23	33	16	36	28
ptchd4	3	2	2	0	0	0	0	0
cnot6a	238	222	268	152	205	302	253	191
mfsd4ab	2	3	2	0	5	2	9	1
klhl24b	626	685	860	547	538	656	591	522
rcor2	5	3	5	0	0	2	3	7
map2k7	28	21	26	24	14	26	30	26
fam114a1	232	178	236	146	196	172	201	144
eif2s3	8769	7969	8970	6875	7803	10236	8127	6877
hand2	0	0	0	0	0	0	0	0
rdh5	0	0	0	0	2	0	0	0
ip6k2a	234	191	241	204	251	258	246	235
ambra1a	126	133	184	93	176	166	178	115
asic1a	170.59	301.09	185.41	146.33	111	83.89	109.19	97.08
znfl2a	0	1	1	0	0	5	0	0
mcl1b	1947.23	1489.75	2002.22	1182.48	1942.82	2128.32	2159.15	1673.31
csnk1da	1158	1191	1073	819	984	992	1216	1014
spred2b	511	446	488	350	264	278	524	330
epn2	672	643	795	559	692	748	796	658
brd7	685	589	680	524	664	697	579	534
arpc1a	2579	2880	3170	2476	2141	2575	2949	2788
hdac6	132	184	219	153	138	177	168	123
mmp14b	25	25	74	65	24	73	17	64
snupn	267	269	342	315	247	246	272	182
ftr24	76	78	68	96	62	36	83	38
cacna1c	197	269	33	120	31	9	92	126
phospho1	1	0	2	0	2	1	1	1
tspan7b	2047	1739	1904	1669	1498	1727	1623	1505
atp11a	1768	1486	1571	1012	1118	1561	1524	924
exoc3l2a	0	1	0	0	2	1	0	0
unc45b	69.15	42.05	43.09	35.92	179.07	70.17	194.97	54.55
bcl2l1	2187	1997	4906	2603	2482	3520	3321	2428
atxn10	99	99	119	103	129	160	147	167
fkbp4	1126	1107	1619	950	1254	1693	1389	956
pcolce2a	36.92	30.96	39.96	28.05	16.35	10	33.21	17.58
cpeb1b	840	818	1120	690	768	814	797	586
faah2a	180	157	92	105	112	125	96	44
anapc5	67	91	87	73	70	72	72	53
apex2	18	24	26	7	19	22	26	9
asb14a	3	1	0	1	10	19	6	1
trmt61a	37	31	46	21	25	28	28	37
lrp3	7	13	27	17	9	10	5	9
dmd	26	26	26	18	21	33	29	20
ltv1	971	1024	1257	867	1110	1223	1277	1001
si:ch211-107o10.3	1228	1107	1601	1161	1105	1176	1416	1104
myl6	253	186	201	144	457	504	289	211
pno1	3102	2720	3154	2521	2814	3773	3185	2332
glcci1a	82	104	186	92	75	68	97	82
sox21b	0	0	0	0	0	0	0	0
chia.4	15	14	18	22	30	43	27	17
yod1	206	235	285	209	204	199	232	222
arhgap12a	5	4	3	3	5	2	0	7
pole3	131	126	225	155	168	293	209	198
zgc:136872	0	0	4	0	0	0	0	3
brap	6623	7649	6212	5628	5022	7887	6581	5868
slc25a24	82	96	138	101	105	99	105	62
fam20b	695.26	504.01	695.55	524.07	545.66	487.4	638.84	485.02
lyst	104	84	80	64	84	113	105	50
mtmr8	316	297	403	221	390	378	400	329
nbas	494	488	487	610	323	377	505	274
cops3	423	382	437	341	354	380	446	348
mttp	0	1	0	0	0	0	1	0
kifap3a	205	195	275	192	217	243	259	194
coro1b	109	104	160	102	102	65	101	90
fign	19	20	21	8	27	37	18	23
snx3	221	221	287	221	186	295	212	209
epas1a	12	33	43	25	4	26	11	9
apeh	74	66	77	43	68	57	79	72
paip2b	1406	1113	1656	1098	1276	1427	1412	1157
lmo3	1	2	1	0	0	0	5	2
prkcba	604	570	821	345	759	770	688	483
ranbp3a	92	50	58	87	51	45	57	73
zgc:66479	385	176	547	430	55	49	67	48
atp6ap2	435	313	379	208	357	498	472	372
esf1	474	365	531	327	486	491	436	360
ube2na	970	788	871	569	947	1029	964	963
entpd6	34	34	42	20	24	42	60	37
tmed5	182	96	170	116	98	179	132	143
tle2b	9	8.28	18.91	7	13.01	31.52	12.26	15.61
cacng1a	0	0	0	0	0	0	0	0
prpf4ba	263	240	288	162	196	180	245	218
dldh	766	672	868	495	710	685	752	678
camk1gb	0	0	0	0	5	20	4	2
actr3b	578	424	369	239	492	642	596	549
her5	0	0	0	0	0	0	0	0
marcksb	4	5	14	9	6	10	10	6
orc3	12	25	26	21	25	20	31	31
bokb	34	28	32	21	61	64	28	41
eml2	2611	2107	2543	1678	2117	1961	2362	2375
cmtm3	191	155	336	240	171	243	173	211
glud1a	202	141	209	121	171	164	148	141
hsf1	287.03	235	322	215	169.07	158	233.85	208.79
chga	4	6	1	4	2	4	9	5
neu1	149	107	146	68	122	171	152	113
si:dkey-46g23.5	0	0	0	0	0	0	0	0
hmbsa	211	180	251	166	271	503	376	307
ptprq	12	7	19	9	9	11	8	7
elp4	84	89	74	61	46	75	123	79
cyp7b1	28	20	25	8	38	21	30	27
mylipa	960	949	603	575	1292	1636	1099	882
tfap2e	0	0	1	0	1	10	0	0
cabp4	0	0	0	0	0	0	0	0
rap1b	2196	1771	2383	1713	1630	2007	1812	1663
usp28	7	18	3	4	18	27	12	17
hprt1	250	253	391	283	237	270	224	253
msx1b	0	3	0	0	1	1	0	0
ctns	143	81	153	96	68	98	122	88
smarca2	2808	2876	3408	2029	2574	2843	2729	2081
si:ch211-241e1.5	192	171	173	108	186	171	134	145
slc8a2a	445	416	497	466	438	675	409	412
mrpl53	87	71	111	89	63	96	92	92
renbp	41	23	34	23	42	33	8	15
sec11a	198	166	230	166	190	202	227	167
ccdc127b	24	18	21	7	19	41	41	20
rtf1	2181	1784	1980	1395	1429	1795	1827.01	1550
pla2g3	0	0	0	0	0	0	0	0
pofut1	168	136	148	145	162	186	157	126
tbl1xr1b	326	332.78	410	260	344	367	422	379
fgb	0	0	0	0	0	6	0	0
mdn1	1016	965	1164	837	918	1031	972	825
golga1	505	452	672	411	458	458	558	416
casq2	2	4	0	1	0	0	7	0
sh3glb2a	53	29	51	40	57	60	53	21
e2f7	0	2	1	1	0	6	10	0
pdia6	621	443	615	457	458	453	490	436
col11a1b	34	20	38	0	0	1	16	5
rhbg	1	1	5	0	8.75	5	1	2
cnr1	35.96	24.11	26.16	11.98	38	17.02	26	12.05
chrna1	399	415	223	227	0	0	152	137
ankrd28b	507	527	671	380	518	454.47	533	538
ank2a	370	759	1359	785	847	998	2378	1116
tnikb	911	915	987	801	443	589	828	433
si:ch73-141c7.1	3086	4064	4423	3804	2548	4080	3999	3584
nphp1	96	98	94	74	90	153	112	101
cbr4	83	35	75	55	189	113	87	55
cd74a	4	3	15	2	3	4	3	5
gata2b	0	0	0	0	0	0	0	0
serinc1	2006	1821	1991	1479	1435	1637	1652	1559
pigc	72	41	90	42	57	74	74	115
sele	5	8	0	2	0	3	1	1
slc10a4	0	0	0	0	0	0	0	0
myo1eb	0	1	1	0	0	0	0	3
hlx1	0	1	2	0	2	0	0	1
tp53bp2a	650	873	500	271	458	322	391	397
ppp1r13bb	1791	1897	2741	1780	1347	1321	1613	1217
pla2g1b	1	0	0	0	0	0	0	0
kmo	165	156	231	89	93	117	160	178
ftr55	0	0	0	0	0	0	0	0
mob1ba	785	580	833	467	547	717	612	554
ctr9	367	421	459	389	449	441	415	450
zfand1	103	131	115	130	74	81	94	67
col16a1	2	2	13	14	0	0	8	5
anxa3a	0	0	0	0	0	0	0	0
prkcda	0	0	0	0	0	0	0	0
slc9a6a	388	344	412	257	250	293	262	247
ppiaa	5849	4548	5029	3570	5694	7606	5651	3996
mfsd13a	122	102	150	98	120	119	142	118
zgc:112437	0	1	1	0	0	0	0	0
tom1l2	195	166	201	80	159	234	235	143
mars2	144	155	184	107	151	210	164	143
fev	0	0	0	2	2	0	0	3
etfb	199	190	201	141	189	184	179	177
napepld	583	541	615	373	403	578	539	360
rtraf	574	542	774	506	556	712	603	447
FAR2	104	80	86	83	62	79	88	75
uevld	109	113	117	88	63	83	72	70
zgc:136439	614.78	515.91	870.87	456.82	323.93	420.85	448.88	272.88
ppm1da	117	147	188	87	169	166	169	135
smyd1a	14.91	12.81	15.72	7.95	18.8	23.83	12.69	23.97
dnm1b	0	0	0	0	0	0	0	0
rpl15	11561	9774	10491	7664	10237	12319	9639	7943
dusp8a	183	175	154	86	164	157	182	155
pvalb6	21	12	3	11	5	1	26	36
napsa	1072	995	864	777	1048	1260	1014	904
clgn	1807	1566	1635	1163	1398	1442	1429	1258
aif1l	161	158	162	88	244	443	248	172
nrap	192.92	218.53	180.01	160.16	124.63	134.59	346.55	167.35
txndc5	441	369	586	395	343	313	351	307
caprin1a	172	131	208	154	117	124	199	122
atg3	255	201	310	211	242	287	193	219
fgf6a	0	1	0	0	0	0	0	0
diras1b	0	0	0	0	0	0	0	0
mpp4l	0	0	2	0	0	2.92	0	0
robo4	2	2	5	2	0	3	0	0
npl	43	38	56	23	35	56	31	37
vcanb	1	3	10	0	12	10	12	5
si:ch211-210b2.2	1	0	1	0	0	1.19	0	0
mef2cb	3	3	9	1	0	5	3	0
tmem30c	12.1	5.85	9.15	6	7.03	8.64	10.03	12.1
ubxn7	419	393	478	302	342	400	442	314
myog	357.95	352	361.99	260.93	300.01	262.71	319.12	274.21
zgc:92137	0	0	0	0	0	0	0	0
atp5mc3b	1906	1643	1900	1452	1355	1673	1623	1338
slc35e4	44	45	57	33	20	45	26	42
rgs9bp	0	0	0	0	0	0	0	0
hnf1a	13.87	5.33	2.09	0	1.08	0	3.17	1.06
nid2b	147	54	111	96	163	189	251	219
med19b	60	43	35	51	41	42	35	47
ppardb	521	476	589	455	505	574	655	565
prkar2ab	96	41	95	111	224	331	231	174
pdcl	1059	981	1209	937	829	998	1007	876
slc38a8a	0	0	0	0	0	0	0	0
arf1	501	504	625	471	419	485	461	431
gipc2	2398	2074	2891	2144	1889	2115	2096	1872
MAP3K13	41	30	25	19	30	33	34	18
xrcc1	215	202	217	142	215	229	193	212
syne1a	6607	6901	7868	6431	5244	8760	6967	6067
prelid3b	384	238	413	224	244	382	316	326
tnfa	0	0	0	0	0	0	0	0
rnf150b	470.61	362.17	432.93	317	252.48	290	316.72	295.49
tial1	1051	846	1144	736	990	1065	1034	919
wls	1849	1675	1995	1354	1735	1508	1730	1241
cldnb	0	0	0	0	0	0	0	0
ubr4	9085	8729	12086	6271	5683	7869	8090	6409
foxi3b	0	0	1	0	0	3	0	0
gng3	3949	3699	4677	3540	4002	5462	4245	3878
wrap73	36	48	42	43	31	28	22	28
spegb	0	0	1	0	0	0	0	0
ca10b	9	13	29	20	0	7	14	18
papola	2574	2500	3091	2195	2704	2920	2972	2608
nr1d2b	1570	1529	1756	1251	1418	1422	1555	1447
ccnc	184	164	232	146	134	148	149	109
rgs12a	5	2	9	1	6	0	8	6
chia.3	0	0	0	0	0	0	0	0
CABZ01027646.1	0	0	0	0	3	0	0	0
nrbp2b	55	38	48	31	46	84	30	36
unc119.1	446	366	397	380	427	489	567	559
rcvrn3	2	0	0	7	8	5	3	1
psmb1	944	800	1164	759	764	873	739	752
lhfpl2a	128	109	119	113	82	48	153	85
fgfr1op2	437	359	389	281	341	374	326	299
si:ch211-197g15.6	0	2	0	0	0	2	0	0
dlg1	383	376	396	298	336	254	320	284
med27	182	137	226	124	143	179	149	135
ppa2	101	78	96	56	95	125	76	56
daam1b	484	498	492	443	423	356	525	358
llgl1	1078	1185	1287	852	969	1132	1038	873
ascl1b	76	38	25	23	10	19	8	2
rpn2	753	601	765	568	609	603	691	581
twf2b	4	1	3	0	0	0	0	1
kif21b	43	52	30	17	26	29	47	58
gigyf2	613	531	726	496	533	640	620	481
cacnb4a	0	0	0	0	0	0	0	0
ppp1r7	3511	3389	3759	3045	3404	4412	3604	3394
efhc1	37	35	17	7	16	15	18	11
fbxw2	157	176	175	117	155	174	152	146
dffb	63	75	111	73	65	97	91	79
sf3b6	483	439	474	318	364	507	409	398
zc3h11a	769	651	848	550	794	887	771	701
srek1	138	100	119	106	153	156	119	101
ppme1	1089	997	1218	793	886	1251	1021	725
mcl1a	15278	15541	19869	10443	9480	14520	7800	3819
myh11a	14	25	40	6	24	22	70	36
slc49a4	283.13	265.23	325.24	284.8	281.27	275.88	203.19	220.79
klc1a	1193	1016	1206	880	847	1087	961	707
smfn	92	72	110	66	90	61	84	95
her4.4	22.19	21.56	19.2	22.06	7.23	10.15	7.08	4.4
pou3f1	0	0	0	0	0	0	4	0
mmp23bb	3	2	21	11.17	14	14	6	10
hdlbpa	16990	16101	19749	13259	14093	16110	16019	14018
agk	536	380	616	362	502	605	543	410
fam117bb	223	189	222	113	157	125	214	179
dusp23a	124	93	229	164	210	169	207	222
wdr41	385	329	515	339	391	539	370	287
dcps	35	35	46	27	51	42	48	40
ddx55	137	120	129	90	131	93	89	93
dcaf11	562	528	613	561	550	520	592	511
mapk8b	85	69	98	56	71	80	69	46
snrpc	289	235	297	207	229	197	203	203
cyp2k6	0	0	0	0	0	0	0	0
ier5	161	164	190	177	150	205	190	195
sult3st1	15	5	10	13	19	6	22	12
rnf114	311	270	333	287	273	312	317	215
znf385a	102	103	78	55	111	95	96	117
slc38a5a	13	46.11	54.98	17.55	24.33	62.07	41.96	28.96
dmbx1a	3	3	0	2	0	0	2	0
cadm2a	145	91	91	102	102	123	137	92
micu2	381	265	561	495	216	221	249	221
erc1a	0	0	0	0	0	0	0	0
cdc6	2	4	12	14	8	4	10	3
fndc4b	169.59	163.29	204.15	167.59	170.53	194.68	199.92	162.77
edf1	3174	3272	3854	2988	2645	3457	3278	2575
med14	250	293	370	217	337	327	293	272
cbl	105	143	156	93	95	129	98	126
rundc3b	0	0	1	0	0	0	0	0
icn	1491	618	2196	1517	1534	1366	1764	1242
fam199x	388.63	306	402	271	592	577	589	452
gna11a	101	111	124	87	126	126	163	112
vim	98337	104181	97960	64927	64827	68892	107262	84717
trim13	176	166	228	170	151	198	120	129
qki2	413	343	509	325	331	385	419	409
grpel1	320	263	330	257	255	320	316	291
CU856539.1	282	209	288	133	199	209	247	238
spon1a	11	11	18	12	15	11	16	3
ssh1b	202	196	263	212	154	144	216	162
cmtm7	3868	3813	3954	2574	2261	2829	2825	2286
engase	2031.89	3556.48	2023.11	2560.51	624.02	1339.71	1467.38	1094.83
dnm1a	0	0	0	0	0	0	0	1
neu3.2	41	101	1	61	2	0	63	30
ufd1l	1936	1983	2310	1679	1744	2058	1781	1637
ndrg3b	343.72	305	351.75	255.58	289.05	259.78	307.35	284.47
itpkb	49	38	49	40	26	27	33	37
adam9	185	213	271	183	147	113	128	132
CR792422.1	0	1	0	0	0	0	0	0
nup133	141	118	199	134	167	202	204	135
rbfox3a	3	1	3	0	0	1	0	0
p4ha2	423	379	464	327	363	496	432	391
slc1a6	0	0	0	0	0	0	0	0
f9a	0	0	0	0	0	0	0	0
pank1b	180	190	187	127	134	110	179	170
bri3bp	21	12	19	9	18	8	17	12
ndufb8	2594	2334	2895	2163	2026	2655	2204	1906
smpdl3b	13	7	4	19	0	3	11	6
dacha	446	500	694	425	791	670	601	655
ldb1a	645	467	539	394	443	456	464	401
plppr3a	0	0	0	0	0	2	0	0
tor4aa	57	56	67	41	61	68	53	39
cpa2	86	52	342	28	0	0	0	3
atp5fa1	4731	4203	4767	3113	3979	4259	4452	3701
vstm4a	1	0	9	5	0	1	0	0
abi1a	297	257	293	209	259	296	268	229
rps15a	7277	6007	6688	5216	5698	6891	5871	5003
myd88	77	55	57	40	57	51	84	42
asap2a	683	594	759	449	522	542	711	618
si:ch73-265h17.1	10.89	14.28	18.06	3.12	8.89	11	16.07	14.02
myo3a	13	20.97	15.98	17.01	12.55	11.55	12.37	26
pax3a	0	0	0	0	0	0	0	0
eif4bb	3438	3044	4194	2486	2710	3464	3112	2523
smad3b	530	727	619	395	238	382	453	282
ppm1na	0	0	0	0	0	3	0	0
rbm22	159.21	130.48	230.85	113.38	165.33	196.86	215.36	134.93
rpl22l1	1341	1211	1168	927	1422	1439	1840	1477
prmt1	875	728	803	596	795	886	766	644
wdr54	41	58	50	37	61	72	27	54
nqo1	87	81	118	111	164	129	138	138
jak3	87	117	117	79	123	194	105	109
bin2b	79	102	60	45	89	87	81	61
igf2bp3	32	31	8	18	6	5.07	7	6
dpydb	1	0	1	2	0	0	0	1
fezf1	0	0	0	0	0	0	0	0
ptgs2b	1	0	1	0	0	0	1.16	0
scamp2	406	299	474	332	381	444	459	383
clasp1a	290	230	310	246	333	337	242	215
xpo4	337	342	310	243	275	275	310	201
fmodb	0	0	0	0	0	0	0	0
kcnh6b	1	0	4	0	3	1	0	4
traf3ip1	67	50	84	62	51	65	103	41
b4galt6	629	502	644	504	645	856	723	591
cp	0	1	0	0	5	1	3	0
qars1	900	654	1067	811	731	931	1007	824
gpr183a	0	0	3	0	0	0	0	0
srpx	2	2	3	0	4	0	12	1
radx	12	9	13	7	15	4	9	1
zgc:56231	0	0	0	1	0	0	0	0
acer1	489	513	531	417	446	523	400	357
c1ql3a	0	1	4	0	0	0	1	0
slc5a3a	0	0	0	0	0	0	0	0
rnf2	1360	1110	1262	934	931	1195	1130	957
lpar5a	0	0	0	0	0	0	0	0
sept4a	3	0	0	0	0	0	0	0
lrrfip2	353	338	526	297	397	449	529	335
ppp4r4	6.02	2	31.18	2	12.1	1.01	16.13	1.01
igsf9b	516	532	404	330	466	363	466	407
epn1	1688	1472	2392	1385	1482	1581	1733	1376
sirt4	52	51	58	30	70	63	62	29
ndrg1b	3	2	1	9	7	10	0	1
npsn	0	0	0	0	0	0	0	0
scara5	88	95	96	63	129	94	134	144
eaf2	131	85	149	102	116	147	97	110
clu	16561	14294	22647	13165	16012	24290	21163	13779
tent5c	1251	1146	1673	1065	788	1246	1188	1137
rnf11a	666	558	811	572	563	657	610	489
trabd	176	142	151	151	156	216	191	190
guca1a	1	4	2	4	4	3	0	0
atp1a2a	0	2.28	1	3	0	0	0	0
p2rx3a	0	2.83	0	0	0	0	0	4
hsp90aa1.1	12.04	44.13	28.09	20.11	38.14	23.11	35.33	29.16
bzw1a	1077	916	1131	917	1138	1233	1224	977
prg4a	0	0	1.25	1	0	0	0	3.47
sae1	177	125	207	163	162	199	164	135
cxcr5	0	0	0	0	2	0	3	2
dvl1a	119	80	150	73	107	133	142	63
rpl21	8551	7386	8182	6465	7095	8625	7441	5798
per3	1975.42	1642.2	1915.61	1285.01	1081.87	1091.51	1061.07	1322.6
si:ch211-282j22.3	142	146	190	120	136	131	108	118
scamp4	701	554	786	546	454	465	578	561
mmgt1	283	202	406	289	146	127	222	157
pdha1b	0	0	1	0	2	0	0	3.01
mmp25b	0	0	0	0	0	0	0	0
spopla	287	204	339	226	233	271	310	210
aqp4	3	0	0	0	3	0	0	0
ezh2	21	34	45	20	25	23	49	34
slc25a25a	264	252	286	188	273	414	338	109
pard3ab	470	407	505	402	324	425	513	429
tex9	25	30	42	25	9	21	26	19
foxn4	0	2	0	3	0	0	0	0
slc7a6os	558	601	880	649	591	688	756	492
mtmr10	3634	3693	3832	2562	5350	6283	3752	4781
zgc:112294	2	0	0	0	0	0	1	2
kctd9b	221	218	260	144	208	262	240	153
sarm1	0	0	0	0	0	0	6	0
themis	9	2	8	0	0	2	1	2
clic2	0	3	2	0	0	2	2	1
hoxb6a	0	0	0	0	0	0	0	0
slc20a1b	19244	17546	21211	14166	14382	15354	15670	12569
arhgap42b	4	3	2	4	3	4	2	2
ppm1k	219	197	183	115	221	194	147	207
insig1	1308	1154	2308	1346	1290	1125	1536	1315
fbxo36a	7	5	3	1	3	17	4	1
trim16	0	0	8	5	0	8	0	0
gngt2a	0	0	0	3	3	8	0	6
tjap1	299	328	393	271	258	253	286	265
il17d	46.71	45.81	35.66	36.69	33.77	56.68	34.76	57.77
crygs4	409326	544437	817137	771783	358242	447056	580857	632218
msi1	744	692	716	464	659	584	616	522
npffr1l3	0	0	0	0	0	0	0	0
chchd10	253	245	277	229	264	366	296	244
44080	1120	979	1527	1088	901	1046	900	792
ttyh2l	0	0	0	0	2	5	0	0
scin	3	2	1	2	1	0	2	2
CABZ01073795.1	93.01	5.46	11	6	0	2	6	2.48
xrcc4	32	33	70	51	55	52	48	81
zgc:101716	202	233	313	246	358	378	270	212
dnaja2b	3092.98	2985.77	3259.87	2530.93	2521.56	3318.5	3121.8	2488.08
acsl4b	332.23	270.22	365.57	235.27	118.34	138.86	231.89	150.05
nod2	52	56	122	96	34	58	90	36
capn12	0	0	0	0	0	0	0	0
flj13639	2	1	1	5	2.99	11	2	2
epha4l	19.08	18.66	6.33	16.52	20.75	24.14	22.02	7.12
sox19a	0	0	0	0	0	0	0	0
pnpla6	4109	3868	3951	3276	4273	3954	3919	3257
tlk2	372	400	410	276	388	441	357	299
zgc:55621	0	0	0	0	0	0	0	0
ppp1r12a	366	329	410	320	329	327	358	248
thbs1b	152	128	80	144	43	66	65	61
homer3b	90	66	109	94	186	146	161	96
dla	0	1	0	0	0	0	0	0
cdc25b	131	148	187	129	134	167	178	151
tfeb	121	138	148	81	103	141	176	106
slc7a14a	0	1	0	0	0	0	2	2
memo1	527	414	647	478	316	480	367	494
churc1	290	218	307	251	200	226	248	237
fshb	0	0	0	0	0	0	0	0
kras	249	294	326	177	288	388	373	267
amt	308	254	293	150	269	342	302	228
DDX17	973.3	894.25	1107.47	706.85	935.98	1021.62	1073.48	915.95
cdkn1ca	0	0	0	0	0	0	0	0
mettl13	48	53	67	47	62	80	48	81
nprl3	310	299	450	115	206	181	201	143
HTRA3	53	21	40	31	66	35	91	45
cacna1fa	0	0	0	0	0	0	0	0
syt14a	2	2	3	0	3	0	1	0
abcb4	30	46	20	19	17	51	23	3
BX957278.1	0	0	0	0	0	0	1	0
pomgnt2	115	63	102	76	62	126	108	93
rapgef6	206	218	245	176	140	209	258	251
cbsb	1844	1346	1649.06	1305	1715.16	1911	1981	2039
kif11	5	10	17	9	17	20	14	19
ndel1a	158	132	130	117	177	169	148	140
sh3glb1b	1408	1161	1536	1039	1141	1466	1323	1054
mpp2b	1	8	5	5	12	3	6	3
glmnb	0	0	0	0	0	0	0	1
fkbp7	3	2	1	4	2	0	4	0
psma8	1170	986	1040	924	1462	1661	1447	1198
rab34b	0	0	0	0	0	0	2	0
trmt1	152.37	150	159.06	93	173	154	154	134
zdhhc3a	31	20	22	4	12	24	24	15
gtf2a1	483	369	642	334	526	472	418	425
hnrnpa1a	947	784	1045	745	683	818	969	886
pdlim3a	1	1	9	2	12	1	2	5
zgc:92907	56	63	54	42	51	76	60	62
fgfr1a	765	718	623	456	564	556	614	539
pgbd5	3	0	0	0	0	0	0	0
slc17a9b	40.73	32.38	30.66	24	34	42.91	27.91	22.23
fbxo9	621	511	646	528	567	655	588	494
camk2b1	125	147	140	98	128	153	131	107
glra3	0	0	0	0	0	0	0	2
ddx11	39	21	41	27	34	22	20	23
zgc:91968	0	0	0	0	0	0	0	0
wdr3	379	290	420	276	326	356	364	312
si:dkey-42l23.2	0	2	6	1	0	0	0	0
si:ch211-288d18.1	232	206	193	136	147	140	145	181
drd2b	8	0	11	5	0	0	0	3
ccna2	44.78	39.57	30.95	31.53	44.78	31.12	51.62	44.48
chrna10a	0	0	0	0	2	0	0	0
pptc7a	428	338	419	243.99	331	395	382	307
snrpb	1750	1585	1401	1370	1433	1563	1416	1227
dpysl5a	133.69	120.7	204.08	205.05	107.09	102.88	130.11	112.71
uqcrb	1135	923	965	751	939	1171	1022	855
rpp14	160	115	178	121	103	166	109	104
arhgef18a	517	328	719	419	566	491	564	372.84
sema3fa	29	37	60	39	31	22	37	26
cahz	0	0	2	0	1	2	0	0
ndrg2	320.78	394	414	376	439	335	379	360
TENM2	16.32	15.36	31.87	9.75	17.68	25.68	34.66	20.09
atp6v1d	301	256	266	223	292	307	255	237
acvr2aa	847	792	953	618	663	764	760	721
fgfr1b	253	223	249	116	228	168	218	184
dnajc11a	643	584	767	472	815	878	948	732
rplp2l	3192	2556	3001	2085	2768	3254	2891	2592
akt2	970	841	971	568	838	863	932	826
ccdc28b	9	9	39	10	5	6	9	5
pcyt1aa	102	63	108	64	99	79	107	84
otx2b	2	0	8	2	0	1	0	1
ppp1r14aa	99	112	115	73	168	199	112	109
ift46	90	83	127	67	89	77	86	115
esrp1	0	0	0	0	0	0	0	0
krr1	212	203	293	166	322	315	282	260
rnpc3	305.08	296.41	395.94	228.91	348.06	337.07	260.72	233.06
enpp2	1	0	0	4	0	2	0	0
trpm1a	0	0	0	7	0	2	0	0
traip	3	3	8	4	5	4	1	1
uqcc2	511	442	535	474	361	403	414	381
tlx2	0	0	0	0	0	0	0	0
si:dkey-110k5.10	0	0	0	0	0	0	0	0
atf7a	100	118	119	88	91	130	117	83
blzf1	474	484	669	390	433	590	604	501
nae1	530	379	583	373	440	441	464	496
stk3	420	395	402	351	393	372	380	317
adra1ba	0	0	0	0	0	0	0	0
ankrd45	1	0	1	0	0	1	0	2
arhgap33	150.87	177.58	238.87	154.08	185.16	179.91	200.95	144.2
ncaldb	0	0	0	0	0	0	0	1
nfatc2ip	98	86	113	120	91	107	97	97
fyna	358	334	386	324	267	395	345	277
zgc:64106	0	0	0	0	0	0	0	0
mknk2a	85044	71904	75247	56705	58605	86142	80441	61458
dnase1l4.2	658.99	702.99	831.99	573.98	781.08	737.96	785.67	666
tnnc1a	0	0	0	0	0	0	0	0
fen1	148	158	169	151	152	152	111	130
rps9	12249	9906	10208	7965	9262	12023	10901	8537
col2a1b	2617	2337	5346	3254	3258	3420	3938	3870
aadat	76	58	84	71	80	103	71	77
sigmar1	376	331	406	284	440	505	468	323
ryr1a	313.85	132.94	426.22	248.88	124.79	189.55	227.3	156.14
ptger2a	45	23	30	32	35	13	41	16
elmsan1a	147.84	139.78	145.67	90.36	170.3	124.65	116.35	137.22
fes	1	1.99	1	2	0	1	2	0
gsna	1505	1319	1407	944	1584	1385	1613	1371
otub1b	364	400	395	250	356	353	351	290
CABZ01044048.1	0	0	0	0	0	0	0	0
afg1la	77	91	121	90	106	144	117	117
calcrla	38	24	40	33	10	23	42	18
gnaq	1	6	3	0	0	0	0	0
sirt2	1198	1168	1099	729	885	1055	1102	883
scube3	3	3	17	0	3	7	7	12
dcun1d3	256.85	269.07	340.97	193.13	303.18	381.06	281.32	241.39
ppm1bb	957	955	810	548	627	624	631	618
si:ch211-212o1.2	451	387	423	322	348	396	361	317
lpcat1	5362	5305	5531	4538	3812	5235	5051	4441
rcc2	302	278	400	332	327	266	360	345
orai1a	51	61	71	41	53	56	40	41
myl4	0	0	0	0	0	0	0	0
upb1	0	0	0	0	0	0	0	0
sema6dl	235	282	246	174	234	265	236	185
ugt2a5	197.49	210.28	311.22	201.37	226.74	180.12	220.19	116.95
arrb2b	386	300	280	169	207	269	257	218
c1ql4a	0	0	0	0	0	0	0	0
atp5pb	3262	2891	3568	2486	2454	3118	2984	2488
spag7	1176.68	1089.26	1098.39	719.14	903.24	1041.82	1031.94	889.64
sfpq	2062	1919	2308	1634	1717	2071	2162	1637
pou6f1	57	61	67	67	75	93	58	40
calcrlb	1	1	3	0	0	0	0	0
abcb11a	28	17	26	22	11	16	37	19
hoxb10a	0	0	0	0	0	0	0	0
si:dkey-23k10.5	36.41	27	14	14	62	60	19	35
sox5	14	11	31	17	14	13	19	3
cry1b	449	463	478	320	371	467	434	318
smarcb1b	112	79	108	108	111	87	133	129
atxn2l	523	544	701	408	542	513	452	377
epha4b	0	0	1	0	0	0	0	0
CRACD	237	240	309	162	228	304	268	206
dennd6b	77	89	131	94	60	77	97	64
FOXK2	302	331	319	234	321	293	281	267
actr1	875	776	995	667	832	889	837	716
rbm39a	857.01	853	964	665	779	963.01	802	743
mybpc3	55	29	28	16	4	4	24	2
slc26a2	16	16	20	11	11	7	11	9
scxb	0	0	0	0	0	0	0	0
syt5b	0	0	0	0	0	0	0	0
snrpd1	446	355	427	342	351	417	437	278
ftr52p	16	24	23	23	37	55	57	41
twf1b	81	76	110	116	131	133	116	114
chuk	548	529	663	380	515	585	514	479
aldoaa	2556	2079	2120	1494	1782	1923	2073	1649
pde6b	5	2	4	0	5	11	2	0
sema3b	3379	3065	3368	1705	2632	2399	3361	2989
si:ch211-246m6.5	5	7	12	13	3	10	11	4
prtfdc1	58	62	112	82	84	68	99	51
ttc36	0	0	0	0	0	0	0	0
esrrgb	1	0	0	0	0	0	0	0
ctsll	0	0	0	0	0	0	0	0
clocka	106	104	128	88	96	182	115	70
C2H5orf22	112	74	107	70	59	86	94	51
marveld1	14	11	21	17	6	13	26	5
b9d1	39	41	29	30	46	33	40	42
u2af2b	692	644	774	570	619	746	729	664
pigo	551	650	666	517	722	725	645	555
ints13	408	303	498	405	454	529	402	344
cpm	1	0	9	20	7	30	19	9
dhrs12	1551	1862	1244	1270	1579	1686	1900	1906
cttn	532	492	586	348	480	473	504	434
stag2a	845	727	886	691	789	843	748	683
tbx6	38	23	21	21	67	51	35	32
tent5bb	25	26	51	48	22	19	30	12
wars2	23	8	32	11	23	23	26	9
mical1	127	142	84	66	71	90	72	48
batf	0	0	0	0	0	0	0	0
pcnx1	339	393	518	325	346	380	433	314
plod2	718	663	803	466	633	522	703	635
pbxip1b	1293	1060	1469	1096.98	1320	1344	1285	1018
cetn3	111.66	136.73	152.11	104.83	118.23	142.34	139.69	122.6
C13H9orf72	268	195	331	165	225	332	285	284
atp5l	1450	1236	1664	927	1589	1950	1789	1411
[truncated: 27,217 more rows]

## Sheet: WT vs abaKO
		logFC	logCPM	LR	PValue	Test_logCPM	control_logCPM	FDR
gene	ENSDARG00000114210	6.46205	1.58776	137.864	7.80473e-32	1.47413	-3.44932	2.28023e-27
gene	ENSDARG00000052713	2.66979	2.9935	110.527	7.51103e-26	3.54501	1.08878	1.09721e-21
gene	ENSDARG00000073735	-8.84986	0.466251	108.288	2.32408e-25	-4.20394	0.879514	2.26334e-21
gene	ENSDARG00000007739	5.19372	-0.0515355	102.911	3.50606e-24	1.38575	-2.87221	2.56082e-20
gene	ENSDARG00000092889	-8.9062	0.82361	96.2972	9.8868e-23	-4.20394	0.948673	5.77705e-19
gene	ENSDARG00000096506	-6.89453	0.687201	95.2385	1.68772e-22	-3.62419	2.00156	8.21805e-19
gene	ENSDARG00000075928	3.55766	0.791482	81.2651	1.97385e-19	1.40291	-1.72213	8.23828e-16
gene	ENSDARG00000044319	2.90902	1.09269	77.5022	1.32577e-18	2.16753	-0.459267	4.84172e-15
gene	ENSDARG00000032963	-1.82977	3.46182	70.912	3.73518e-17	1.82119	3.8051	1.21252e-13
gene	ENSDARG00000060962	-3.05968	0.921379	70.5572	4.47117e-17	-0.745045	2.36039	1.3063e-13
gene	ENSDARG00000014427	-5.24395	-0.532725	66.8129	2.98536e-16	-3.21393	1.3306	7.92912e-13
gene	ENSDARG00000095179	3.57765	0.874464	64.7488	8.5081e-16	1.78466	-1.39618	1.9121e-12
gene	ENSDARG00000094537	-7.95211	-0.625097	64.7907	8.32926e-16	-4.20394	0.0220682	1.9121e-12
gene	ENSDARG00000030687	2.05182	5.31355	62.2194	3.07253e-15	5.52279	3.64859	6.41193e-12
gene	ENSDARG00000004952	-6.04566	-1.39231	58.0247	2.58844e-14	-3.88468	0.401605	5.04159e-11
gene	ENSDARG00000117011	2.78442	1.73806	56.384	5.96143e-14	3.35258	0.817948	1.08856e-10
gene	ENSDARG00000005972	1.39866	4.89876	55.4962	9.36392e-14	6.07533	4.86068	1.60927e-10
gene	ENSDARG00000100598	2.47275	1.85892	54.9867	1.2135e-13	1.39026	-0.795502	1.96964e-10
gene	ENSDARG00000005913	-4.34974	-0.909735	53.6164	2.43719e-13	-3.19188	0.499879	3.74763e-10
gene	ENSDARG00000101135	-4.69053	0.557297	52.2814	4.8091e-13	-2.75062	1.53742	7.02513e-10
gene	ENSDARG00000002745	-1.67002	6.31116	51.9854	5.5915e-13	5.26361	7.13138	7.77911e-10
gene	ENSDARG00000012824	-5.07054	0.774657	51.7382	6.34177e-13	-3.6127	0.298673	8.42187e-10
gene	ENSDARG00000105095	3.57915	1.33556	51.0298	9.09734e-13	2.23485	-1.00396	1.15418e-09
gene	ENSDARG00000089463	-2.75133	-0.172923	50.9487	9.48123e-13	-1.56228	1.16721	1.15418e-09
gene	ENSDARG00000061585	8.18569	-1.5792	49.7397	1.75554e-12	0.0404352	-4.0452	2.05159e-09
gene	ENSDARG00000102445	-2.26408	1.49698	48.2717	3.7107e-12	-0.201091	2.16827	4.16969e-09
gene	ENSDARG00000074052	-7.40884	-2.14368	47.8469	4.60844e-12	-4.20394	-0.482179	4.98667e-09
gene	ENSDARG00000023768	3.74651	0.268453	46.6185	8.62422e-12	-0.00787592	-2.87581	8.99876e-09
gene	ENSDARG00000041078	-1.62424	3.16104	46.0516	1.1518e-11	1.8823	3.66104	1.16038e-08
gene	ENSDARG00000059826	-1.52219	4.36714	44.9662	2.00461e-11	3.27195	4.95419	1.95221e-08
gene	ENSDARG00000078731	-7.39545	-2.15063	44.902	2.07142e-11	-4.20394	-0.485924	1.95221e-08
gene	ENSDARG00000032389	-1.38162	3.60613	44.8024	2.17952e-11	2.65799	4.2142	1.9899e-08
gene	ENSDARG00000076862	4.63441	-1.16132	44.2733	2.85586e-11	-0.301881	-3.45893	2.52839e-08
gene	ENSDARG00000074136	-7.66777	-1.9499	43.9711	3.33261e-11	-4.20394	-0.243298	2.86369e-08
gene	ENSDARG00000070845	-4.58082	-1.83431	41.7211	1.05268e-10	-3.6127	-0.184611	8.7872e-08
gene	ENSDARG00000079402	-2.67734	0.774707	41.2319	1.35197e-10	-0.802336	1.92303	1.0972e-07
gene	ENSDARG00000101271	-3.75597	-0.390843	40.3079	2.16928e-10	-2.28739	1.27632	1.71291e-07
gene	ENSDARG00000061848	-6.13195	-0.172041	40.1105	2.39999e-10	-3.62419	1.21856	1.84522e-07
gene	ENSDARG00000113721	7.43566	-1.3688	39.1876	3.84979e-10	-0.609326	-4.0452	2.88398e-07
gene	ENSDARG00000074644	-5.75466	-1.61557	38.9833	4.2745e-10	-3.88468	0.075895	3.12209e-07
gene	ENSDARG00000099985	-2.22937	3.59861	38.8591	4.55526e-10	0.745143	3.128	3.24601e-07
gene	ENSDARG00000075748	-8.16893	0.878951	38.6529	5.06272e-10	-4.20394	0.270545	3.52173e-07
gene	ENSDARG00000053833	-2.35265	0.135687	38.3996	5.76453e-10	-1.31524	1.05677	3.91667e-07
gene	ENSDARG00000112690	-3.54482	1.06282	38.1377	6.59256e-10	-1.64527	1.80417	4.37746e-07
gene	ENSDARG00000069583	-5.98017	3.45548	37.7217	8.15917e-10	-1.00822	4.91511	5.29729e-07
gene	ENSDARG00000039352	2.70378	-0.960361	37.6463	8.48086e-10	0.388176	-1.87614	5.38645e-07
gene	ENSDARG00000020610	-7.13794	-2.33275	37.5543	8.89021e-10	-4.20394	-0.71786	5.5263e-07
gene	ENSDARG00000022532	-8.45917	-0.378285	37.0935	1.12599e-09	-4.20394	0.491933	6.85355e-07
gene	ENSDARG00000103551	-3.44553	0.937385	37.0227	1.16762e-09	-0.816295	2.76481	6.96185e-07
gene	ENSDARG00000013317	-1.40154	4.05276	36.6964	1.38037e-09	3.12506	4.70712	8.06578e-07
gene	ENSDARG00000098928	4.94587	0.502712	36.0556	1.91767e-09	0.00698904	-3.43855	1.09856e-06
gene	ENSDARG00000032206	-1.72787	2.18575	35.6948	2.30778e-09	0.507042	2.3559	1.29662e-06
gene	ENSDARG00000109774	1.90397	3.64705	35.5948	2.4293e-09	4.05644	2.36402	1.31434e-06
gene	ENSDARG00000100234	-4.70025	-1.4974	35.6009	2.42179e-09	-3.76414	-0.452645	1.31434e-06
gene	ENSDARG00000104344	2.42158	1.23288	35.0231	3.25823e-09	2.18021	0.0496864	1.73077e-06
gene	ENSDARG00000088615	3.09671	-1.60649	34.4219	4.4371e-09	-0.180836	-2.58511	2.3149e-06
gene	ENSDARG00000053272	-5.35695	-0.133703	34.3767	4.54126e-09	-3.88468	-0.299368	2.32767e-06
gene	ENSDARG00000031761	-3.53929	-1.15554	34.2813	4.76936e-09	-3.04087	-0.0505018	2.40244e-06
gene	ENSDARG00000013853	-1.78623	2.79151	34.0996	5.23625e-09	0.938983	2.84342	2.59292e-06
gene	ENSDARG00000078475	-7.1959	-2.30082	33.9507	5.65267e-09	-4.20394	-0.689184	2.75247e-06
gene	ENSDARG00000036175	-3.27603	0.580555	33.5229	7.04289e-09	-2.52384	0.486765	3.3732e-06
gene	ENSDARG00000052396	-2.97409	-0.87388	33.4115	7.45811e-09	-2.09741	0.78097	3.51445e-06
gene	ENSDARG00000071684	-7.04035	-2.32536	33.3147	7.83895e-09	-4.20394	-0.840445	3.63528e-06
gene	ENSDARG00000037192	-7.17628	-0.0415604	33.2717	8.014e-09	-4.20394	-0.731076	3.65839e-06
gene	ENSDARG00000115564	2.72622	0.365481	32.9838	9.2929e-09	0.0810331	-2.11535	4.17694e-06
gene	ENSDARG00000045011	-3.60605	-0.295228	32.8391	1.0011e-08	-2.88585	0.259403	4.43153e-06
gene	ENSDARG00000034559	-3.82371	-1.54069	31.9524	1.58e-08	-3.40424	-0.395162	6.88973e-06
gene	ENSDARG00000037097	1.82002	0.833228	31.48	2.015e-08	2.27122	0.639458	8.46825e-06
gene	ENSDARG00000077760	1.51882	3.9748	31.4667	2.02895e-08	4.18118	2.86606	8.46825e-06
gene	ENSDARG00000070126	-3.90354	-1.80123	31.4903	2.00444e-08	-3.53654	-0.61681	8.46825e-06
gene	ENSDARG00000089913	-6.74717	-2.44055	30.972	2.61775e-08	-4.20394	-1.09449	1.07719e-05
gene	ENSDARG00000057644	1.57721	1.00157	30.7708	2.90369e-08	1.47528	0.128761	1.17825e-05
gene	ENSDARG00000053201	-2.67584	-0.424863	30.4735	3.38459e-08	-2.28256	0.219704	1.35458e-05
gene	ENSDARG00000063257	-6.74998	-1.99944	30.3448	3.61677e-08	-4.20394	-1.09532	1.42794e-05
gene	ENSDARG00000026820	2.92901	-1.33514	29.9406	4.45482e-08	-0.331983	-2.58511	1.73536e-05
gene	ENSDARG00000020548	-4.82409	-2.29954	29.7549	4.90262e-08	-3.88468	-0.763619	1.88467e-05
gene	ENSDARG00000108401	3.86306	-0.235798	29.5844	5.35331e-08	0.501142	-2.58165	2.0312e-05
gene	ENSDARG00000021688	-3.5972	-1.00632	29.332	6.09789e-08	-2.6018	0.755618	2.28405e-05
gene	ENSDARG00000093386	-1.88601	1.55842	29.2583	6.33453e-08	0.188816	2.1911	2.34265e-05
gene	ENSDARG00000096217	3.08	0.286915	29.1452	6.71523e-08	0.390835	-2.13593	2.4524e-05
gene	ENSDARG00000057913	1.80342	0.583899	28.8126	7.97314e-08	1.59546	0.0165769	2.87584e-05
gene	ENSDARG00000100321	2.86196	-0.681819	28.7638	8.17657e-08	0.0610522	-2.23172	2.89917e-05
gene	ENSDARG00000100703	1.74719	0.806982	28.7497	8.23629e-08	1.33426	-0.161925	2.89917e-05
gene	ENSDARG00000024032	-3.64173	-0.407399	28.3913	9.91121e-08	-2.88056	0.308885	3.44721e-05
gene	ENSDARG00000042496	-2.30118	1.55209	28.3031	1.03731e-07	0.300248	2.72292	3.56543e-05
gene	ENSDARG00000032743	1.95187	0.0015522	28.1462	1.12489e-07	0.740115	-0.916841	3.73986e-05
gene	ENSDARG00000056001	1.37884	4.16713	28.1379	1.12969e-07	4.4995	3.28394	3.73986e-05
gene	ENSDARG00000099555	-1.06374	4.81833	28.1216	1.13926e-07	3.89267	5.12756	3.73986e-05
gene	ENSDARG00000015312	-3.03271	-1.41342	28.187	1.10141e-07	-2.74544	-0.0712818	3.73986e-05
gene	ENSDARG00000091660	-2.58913	3.39252	27.7503	1.38024e-07	1.47324	4.16166	4.48055e-05
gene	ENSDARG00000071044	-4.53777	-1.56814	27.7079	1.41084e-07	-3.88468	-0.998553	4.52958e-05
gene	ENSDARG00000027041	2.78604	-0.877715	27.4218	1.63574e-07	-0.160648	-2.3441	5.19453e-05
gene	ENSDARG00000114537	4.7303	-2.19342	27.3238	1.72079e-07	-1.02193	-3.7226	5.40588e-05
gene	ENSDARG00000004953	-6.70669	-2.62786	27.175	1.85845e-07	-4.20394	-1.13127	5.77622e-05
gene	ENSDARG00000005814	5.19634	-1.84318	27.0639	1.96839e-07	-0.64672	-3.7226	5.99047e-05
gene	ENSDARG00000091304	-0.94474	3.47542	27.0691	1.96316e-07	2.77226	3.89376	5.99047e-05
gene	ENSDARG00000054331	4.51186	-1.24916	26.8869	2.15718e-07	-1.19922	-3.72391	6.43875e-05
gene	ENSDARG00000103054	1.95295	2.4573	26.8846	2.15977e-07	3.63547	1.91236	6.43875e-05
gene	ENSDARG00000041723	4.61834	-1.6296	26.8128	2.2415e-07	-1.09261	-3.7226	6.57182e-05
gene	ENSDARG00000062510	-2.30797	-0.96694	26.7968	2.26015e-07	-1.8876	0.345138	6.57182e-05
gene	ENSDARG00000088656	-8.9776	-0.0640612	26.7868	2.27189e-07	-4.20394	0.968963	6.57182e-05
gene	ENSDARG00000105417	2.47825	0.402287	26.624	2.47155e-07	1.31681	-0.882056	7.07928e-05
gene	ENSDARG00000002285	-1.28921	2.37426	26.5561	2.55995e-07	1.38045	2.83948	7.26132e-05
gene	ENSDARG00000088708	-3.5142	-1.72889	26.4851	2.65585e-07	-3.40424	-0.683383	7.46088e-05
gene	ENSDARG00000093173	-6.55871	-2.70971	26.3718	2.81629e-07	-4.20394	-1.23331	7.83625e-05
gene	ENSDARG00000088100	-5.55734	-0.712479	26.187	3.09896e-07	-3.88468	-0.123142	8.54143e-05
gene	ENSDARG00000105391	3.26719	-1.75441	26.1497	3.15952e-07	-0.729643	-3.0427	8.62695e-05
gene	ENSDARG00000068194	-2.27359	0.317574	26.0194	3.3801e-07	-1.67462	0.589847	9.1438e-05
gene	ENSDARG00000004131	-1.07706	4.44753	25.7598	3.86649e-07	2.89597	4.14182	0.000103636
gene	ENSDARG00000074378	-1.67334	1.89576	25.6797	4.03044e-07	0.676771	2.46368	0.000107048
gene	ENSDARG00000040252	6.46821	-2.45962	25.6414	4.1113e-07	-1.48123	-4.0452	0.000107246
gene	ENSDARG00000030110	-3.46031	-0.670001	25.6556	4.08107e-07	-2.87526	0.202398	0.000107246
gene	ENSDARG00000045352	-0.84034	5.80641	25.5591	4.29029e-07	4.60726	5.62443	0.000110925
gene	ENSDARG00000098911	1.80335	2.276	25.5337	4.34724e-07	1.59443	0.0100123	0.000111411
gene	ENSDARG00000106669	-3.85714	-2.17329	25.4978	4.42891e-07	-3.6127	-0.831291	0.000112518
gene	ENSDARG00000087057	-3.11252	-0.234196	25.4298	4.58779e-07	-2.81695	-0.0457298	0.000115549
gene	ENSDARG00000097394	-1.4312	1.77141	25.3501	4.7812e-07	0.594431	2.15324	0.000119391
gene	ENSDARG00000099395	-1.39387	3.04075	25.2904	4.93156e-07	2.23262	3.78023	0.000121697
gene	ENSDARG00000086374	-3.22504	0.797383	25.2805	4.95686e-07	-0.726105	2.6537	0.000121697
gene	ENSDARG00000063631	2.34754	-0.64371	24.8583	6.17024e-07	-0.173258	-2.04717	0.000148983
gene	ENSDARG00000056203	-1.73296	1.91261	24.8656	6.14711e-07	-0.230166	1.58909	0.000148983
gene	ENSDARG00000006257	6.7146	-1.4369	24.7571	6.50287e-07	-1.32426	-4.0452	0.000155728
gene	ENSDARG00000101595	-3.44399	-2.14896	24.5348	7.29798e-07	-3.40424	-0.759901	0.000173348
gene	ENSDARG00000096874	6.31406	-2.74697	24.5048	7.41245e-07	-1.62347	-4.0452	0.000174647
gene	ENSDARG00000103001	2.3124	3.04924	24.4112	7.78144e-07	3.70257	1.63996	0.000181874
gene	ENSDARG00000045095	1.25256	2.54598	24.3109	8.19726e-07	3.0021	1.9366	0.000190072
gene	ENSDARG00000037517	-1.03643	3.67869	24.275	8.35149e-07	2.37683	3.59396	0.000192052
gene	ENSDARG00000113320	-6.27776	-2.73354	24.2606	8.41413e-07	-4.20394	-1.48541	0.000192052
gene	ENSDARG00000057683	1.77821	0.317106	24.176	8.79191e-07	0.83289	-0.685558	0.000197588
gene	ENSDARG00000115199	-4.80572	0.597903	24.1898	8.72949e-07	-2.73901	1.71003	0.000197588
gene	ENSDARG00000079188	1.29223	1.76798	24.072	9.27975e-07	2.17749	1.07698	0.000205392
gene	ENSDARG00000028367	-5.34941	-1.0809	24.0801	9.2408e-07	-3.61845	0.616227	0.000205392
gene	ENSDARG00000101452	-2.83845	-1.477	23.999	9.63863e-07	-2.88056	-0.426555	0.000211731
gene	ENSDARG00000016527	-4.74035	-0.153944	23.9402	9.93742e-07	-2.72984	1.75264	0.000216665
gene	ENSDARG00000007813	1.03795	3.15284	23.7555	1.09381e-06	3.25378	2.38874	0.000234975
gene	ENSDARG00000059438	-3.57602	-0.577214	23.7626	1.08977e-06	-3.38735	-0.623959	0.000234975
gene	ENSDARG00000096187	1.99994	-0.151938	23.648	1.15666e-06	0.539107	-1.13018	0.000246663
gene	ENSDARG00000041623	-1.76474	0.659306	23.2692	1.4084e-06	-0.42287	1.46281	0.000298172
gene	ENSDARG00000037633	1.25801	5.90371	23.1925	1.46565e-06	6.16577	5.10286	0.000308062
gene	ENSDARG00000099444	2.59669	1.11644	23.1225	1.52003e-06	1.66843	-0.566489	0.000317209
gene	ENSDARG00000071549	1.58439	1.49511	23.0284	1.59628e-06	1.80522	0.412792	0.000329917
gene	ENSDARG00000077812	-1.66236	4.7766	23.0197	1.60351e-06	3.75752	5.61409	0.000329917
gene	ENSDARG00000104555	1.90502	1.70017	22.7072	1.88655e-06	1.14907	-0.520659	0.000376655
gene	ENSDARG00000096233	1.52499	2.4155	22.7473	1.84764e-06	2.6714	1.37669	0.000376655
gene	ENSDARG00000037429	-3.03555	0.58582	22.7033	1.89047e-06	-1.19281	1.79527	0.000376655
gene	ENSDARG00000056024	-3.04918	-2.00804	22.6985	1.89514e-06	-3.20844	-0.759158	0.000376655
gene	ENSDARG00000026236	-3.92989	-0.509706	22.7157	1.87828e-06	-3.04624	0.343814	0.000376655
gene	ENSDARG00000092903	1.43592	3.30479	22.6576	1.93596e-06	3.77571	2.49972	0.000382168
gene	ENSDARG00000102873	1.63461	3.63832	22.5587	2.03817e-06	3.49484	2.06941	0.000398707
gene	ENSDARG00000091061	-1.7217	3.598	22.5504	2.04703e-06	1.94235	3.78647	0.000398707
gene	ENSDARG00000095592	6.32403	-1.34391	22.3464	2.27637e-06	-1.6029	-4.0452	0.00044044
gene	ENSDARG00000103285	-6.2212	-2.34693	22.1794	2.48322e-06	-4.20394	-1.529	0.000476717
gene	ENSDARG00000036215	-6.31341	-2.00268	22.1692	2.4965e-06	-4.20394	-1.46096	0.000476717
gene	ENSDARG00000105479	1.72143	-0.0258766	22.1439	2.52957e-06	0.599815	-0.832054	0.000479895
gene	ENSDARG00000102617	-1.68277	2.34366	22.1137	2.56973e-06	1.59737	3.40688	0.000484369
gene	ENSDARG00000028012	-1.10417	1.57667	21.9999	2.72667e-06	1.68888	2.96158	0.000510657
gene	ENSDARG00000079499	3.5111	1.69404	21.9313	2.8259e-06	2.79966	-0.397119	0.00052587
gene	ENSDARG00000075183	-3.33017	-1.74814	21.8111	3.00852e-06	-3.39863	-0.861336	0.00055281
gene	ENSDARG00000056065	-6.22582	-2.90185	21.8204	2.99394e-06	-4.20394	-1.51726	0.00055281
gene	ENSDARG00000039063	-2.77927	-1.61312	21.7537	3.09992e-06	-2.96955	-0.614104	0.000563912
gene	ENSDARG00000054805	-3.43668	-2.25387	21.749	3.10754e-06	-3.40424	-0.754696	0.000563912
gene	ENSDARG00000089477	-1.27476	2.04909	21.7349	3.13048e-06	1.15563	2.60543	0.000564568
gene	ENSDARG00000090708	-2.32697	-1.43724	21.4588	3.61504e-06	-2.23413	-0.0286704	0.000647958
gene	ENSDARG00000034093	0.918659	6.03329	21.4401	3.65059e-06	6.27265	5.54441	0.000650339
gene	ENSDARG00000014208	-6.11659	-2.96655	21.2949	3.93787e-06	-4.20394	-1.63076	0.000697266
gene	ENSDARG00000044795	-4.32215	-2.50615	21.2665	3.99646e-06	-3.88468	-1.18317	0.000703377
gene	ENSDARG00000051874	-3.27557	-2.10053	21.1272	4.29787e-06	-3.40424	-0.918407	0.000751896
gene	ENSDARG00000019995	-6.17097	-2.47251	21.0113	4.56578e-06	-4.20394	-1.58938	0.00079401
gene	ENSDARG00000105161	2.52955	-0.305852	20.8892	4.86636e-06	-0.52301	-2.43905	0.000841275
gene	ENSDARG00000086746	-0.94831	6.74226	20.8072	5.07904e-06	6.20745	7.32346	0.000872878
gene	ENSDARG00000092070	-4.43082	-1.4007	20.627	5.58045e-06	-3.53207	-0.153156	0.000953441
gene	ENSDARG00000074442	2.58638	-1.68163	20.5957	5.67224e-06	-0.491405	-2.46127	0.000963489
gene	ENSDARG00000053424	-5.32689	-0.0829112	20.5802	5.71851e-06	-3.61944	0.415064	0.000965734
gene	ENSDARG00000042138	-3.6346	-2.3316	20.5605	5.77747e-06	-3.61845	-1.04252	0.000970084
gene	ENSDARG00000078114	-2.24453	-0.135845	20.5272	5.87892e-06	-1.83624	0.337576	0.000975901
gene	ENSDARG00000077121	-2.78329	-0.335922	20.5303	5.86934e-06	-1.89201	0.770222	0.000975901
gene	ENSDARG00000054560	1.42445	0.75642	20.4464	6.13237e-06	1.48791	0.265009	0.00101222
gene	ENSDARG00000113257	6.10431	-2.85504	20.4005	6.28139e-06	-1.80607	-4.0452	0.00103026
gene	ENSDARG00000011769	4.64527	-1.22586	20.3904	6.3147e-06	-1.13474	-3.7226	0.00103026
gene	ENSDARG00000035649	-1.00924	5.16759	20.3699	6.3827e-06	4.62384	5.80124	0.00103026
gene	ENSDARG00000005853	-1.50325	0.778559	20.3767	6.35987e-06	-0.255852	1.37966	0.00103026
gene	ENSDARG00000056690	0.99505	4.13769	20.337	6.49318e-06	4.09173	3.273	0.00103488
gene	ENSDARG00000018619	-1.71969	0.402249	20.3299	6.51758e-06	-1.03588	0.732276	0.00103488
gene	ENSDARG00000079614	-4.65321	-0.697624	20.3365	6.4949e-06	-3.59335	-0.0133379	0.00103488
gene	ENSDARG00000103554	-2.1279	-0.51607	20.1986	6.98045e-06	-1.45873	0.690375	0.00110238
gene	ENSDARG00000054103	1.82827	-0.468142	20.1798	7.0494e-06	0.0845801	-1.39979	0.00110654
gene	ENSDARG00000022614	-6.42481	-2.78411	20.1708	7.08249e-06	-4.20394	-1.33922	0.00110654
gene	ENSDARG00000015790	-2.08998	-0.276977	20.1467	7.17243e-06	-1.75806	0.271723	0.00111463
gene	ENSDARG00000102424	-2.36633	-1.31294	20.0978	7.358e-06	-2.50394	-0.339977	0.00113741
gene	ENSDARG00000086903	-3.1538	-1.99154	19.8998	8.16068e-06	-3.20844	-0.645439	0.00125485
gene	ENSDARG00000004794	5.97862	-3.03569	19.8393	8.42342e-06	-1.89641	-4.0452	0.00128847
gene	ENSDARG00000099867	1.33499	1.31771	19.8276	8.4752e-06	2.06423	0.958089	0.00128964
gene	ENSDARG00000093043	-1.94216	-0.147659	19.7384	8.87979e-06	-1.45495	0.530907	0.00134007
gene	ENSDARG00000114012	-3.0147	-1.60529	19.7344	8.89832e-06	-3.3135	-0.966687	0.00134007
gene	ENSDARG00000094578	-1.66036	-0.394831	19.6625	9.23981e-06	-1.3039	0.399756	0.00138436
gene	ENSDARG00000052575	-5.99497	-2.73994	19.5983	9.55518e-06	-4.20394	-1.72409	0.00142431
gene	ENSDARG00000071497	-4.22419	-2.38565	19.5782	9.65642e-06	-3.88468	-1.29405	0.00143209
gene	ENSDARG00000103949	-2.37715	-0.988226	19.5477	9.81202e-06	-2.61202	-0.492675	0.00144782
gene	ENSDARG00000023940	3.51253	-1.98918	19.339	1.09445e-05	-1.31902	-3.46148	0.00160681
gene	ENSDARG00000077928	2.06522	-1.07023	19.3064	1.1133e-05	-0.240242	-1.87411	0.0016102
gene	ENSDARG00000104296	1.19635	3.09433	19.3096	1.11147e-05	3.56735	2.53489	0.0016102
gene	ENSDARG00000103727	-6.00289	-2.73951	19.3206	1.10506e-05	-4.20394	-1.72702	0.0016102
gene	ENSDARG00000032199	-3.78448	-0.872319	19.187	1.18515e-05	-3.62419	-0.909008	0.00170568
gene	ENSDARG00000053535	-3.49401	-1.58523	19.1733	1.19371e-05	-3.62419	-1.18998	0.00170958
gene	ENSDARG00000102798	2.11731	0.0370888	19.14	1.21474e-05	0.327019	-1.46372	0.00173122
gene	ENSDARG00000028894	1.18756	3.15977	19.1224	1.22598e-05	3.71857	2.71388	0.00173875
gene	ENSDARG00000038384	-1.79264	3.91588	19.085	1.25025e-05	3.33335	5.30888	0.0017646
gene	ENSDARG00000039605	-0.805823	5.31661	18.9518	1.34061e-05	4.55905	5.55108	0.00184751
gene	ENSDARG00000110917	-1.91051	-1.24064	18.9707	1.32741e-05	-1.8425	0.0296695	0.00184751
gene	ENSDARG00000098204	-2.40599	3.31371	18.9532	1.33966e-05	2.32091	4.99474	0.00184751
gene	ENSDARG00000079269	-2.58118	-1.26045	18.9876	1.31573e-05	-2.89071	-0.684573	0.00184751
gene	ENSDARG00000014976	-5.90376	-1.93885	18.9608	1.33429e-05	-4.20394	-1.79861	0.00184751
gene	ENSDARG00000059121	5.97216	-2.22865	18.9291	1.35668e-05	-1.89641	-4.0452	0.00186088
gene	ENSDARG00000059805	8.11714	0.326397	18.8682	1.40066e-05	0.143064	-4.0452	0.00191223
gene	ENSDARG00000114142	1.33071	1.91717	18.834	1.42604e-05	2.17479	1.06776	0.00191586
gene	ENSDARG00000011407	0.785477	6.74877	18.8298	1.42918e-05	6.84661	6.23258	0.00191586
gene	ENSDARG00000069995	-1.36458	1.139	18.8494	1.41454e-05	-0.258457	1.22266	0.00191586
gene	ENSDARG00000078797	-2.31731	-0.4899	18.8213	1.43556e-05	-2.28616	-0.112565	0.00191586
gene	ENSDARG00000087012	-5.90197	-2.85949	18.8206	1.43611e-05	-4.20394	-1.79761	0.00191586
gene	ENSDARG00000013526	-1.36711	2.88806	18.7866	1.46191e-05	2.1097	3.66814	0.00194141
gene	ENSDARG00000090642	3.56468	-1.70066	18.731	1.50514e-05	-0.545901	-3.04392	0.00197242
gene	ENSDARG00000029795	-1.49451	0.413882	18.7333	1.50337e-05	-0.644877	0.942346	0.00197242
gene	ENSDARG00000078302	-6.28743	-2.86201	18.7306	1.50551e-05	-4.20394	-1.45454	0.00197242
gene	ENSDARG00000015164	-0.708502	7.69942	18.6686	1.5552e-05	7.15071	8.0351	0.0020196
gene	ENSDARG00000039269	-0.917923	5.26653	18.6685	1.55535e-05	4.4781	5.59239	0.0020196
gene	ENSDARG00000076834	1.42034	1.45354	18.5631	1.64372e-05	1.68656	0.502653	0.00212491
gene	ENSDARG00000058257	-1.08117	4.54291	18.55	1.65507e-05	3.68509	4.92907	0.00213016
gene	ENSDARG00000077256	-0.762699	4.68576	18.5192	1.68201e-05	4.25088	5.19733	0.00215534
gene	ENSDARG00000110103	2.68843	-2.16097	18.4952	1.70335e-05	-0.982795	-2.87221	0.00217314
gene	ENSDARG00000074345	1.86221	-0.88222	18.4482	1.74588e-05	-0.19514	-1.68579	0.00221773
gene	ENSDARG00000005464	-3.23606	-1.98144	18.3437	1.84423e-05	-3.393	-0.911358	0.00233252
gene	ENSDARG00000088078	-6.07763	-2.44663	18.3141	1.87313e-05	-4.20394	-1.65223	0.00235885
gene	ENSDARG00000107280	-2.90342	-2.27699	18.2876	1.89939e-05	-3.20293	-0.870382	0.00238166
gene	ENSDARG00000099483	-1.45988	0.74294	18.2744	1.91257e-05	-0.347392	1.23485	0.00238793
gene	ENSDARG00000015554	-6.0095	-2.93814	18.261	1.92609e-05	-4.20394	-1.728	0.00239459
gene	ENSDARG00000104292	-1.24458	1.57333	18.2352	1.95238e-05	0.841778	2.26106	0.00241698
gene	ENSDARG00000075389	-5.99831	-3.02599	18.1911	1.99809e-05	-4.20394	-1.71876	0.00246312
gene	ENSDARG00000091062	-5.92345	-3.01612	18.1769	2.01311e-05	-4.20394	-1.77455	0.00247122
gene	ENSDARG00000040433	7.17579	-0.903177	18.1564	2.03485e-05	-0.739286	-4.0452	0.00248746
gene	ENSDARG00000110454	5.93639	-2.37363	18.1029	2.09282e-05	-1.95909	-4.0452	0.00254273
gene	ENSDARG00000100795	1.27238	0.6275	18.0987	2.09747e-05	1.43093	0.385651	0.00254273
gene	ENSDARG00000090876	-4.82307	-1.19159	17.9901	2.22058e-05	-3.88468	-0.755842	0.00268085
gene	ENSDARG00000088650	0.936045	2.86039	17.8664	2.36969e-05	3.05416	2.30726	0.00284909
gene	ENSDARG00000003675	0.956214	4.10057	17.8391	2.40393e-05	4.27194	3.51326	0.00287842
gene	ENSDARG00000009825	2.62185	-1.42706	17.8012	2.4523e-05	-1.0392	-2.87461	0.00292434
gene	ENSDARG00000112977	1.0089	2.4147	17.7712	2.49132e-05	2.95204	2.11285	0.00295377
gene	ENSDARG00000035056	-6.09329	-2.5372	17.7667	2.4972e-05	-4.20394	-1.65608	0.00295377
gene	ENSDARG00000027419	-3.01062	-1.91112	17.6894	2.60078e-05	-3.37223	-1.07988	0.00306389
gene	ENSDARG00000078828	1.39721	1.46487	17.6683	2.62975e-05	1.53921	0.364817	0.00308557
gene	ENSDARG00000068716	3.94757	-2.57162	17.634	2.67762e-05	-1.68303	-3.7226	0.0031001
gene	ENSDARG00000045038	2.22869	-0.393519	17.6072	2.71559e-05	0.0377903	-1.80458	0.0031001
gene	ENSDARG00000004322	2.21029	-1.18117	17.6066	2.7164e-05	-0.624905	-2.30051	0.0031001
gene	ENSDARG00000071498	1.98115	1.58496	17.6149	2.70456e-05	2.79057	1.05337	0.0031001
gene	ENSDARG00000101807	1.9194	-0.667857	17.6418	2.66657e-05	-0.196222	-1.73013	0.0031001
gene	ENSDARG00000094556	-3.32794	0.539871	17.6159	2.70324e-05	-3.39863	-0.827476	0.0031001
gene	ENSDARG00000096950	-5.89487	-2.82114	17.6169	2.70178e-05	-4.20394	-1.78424	0.0031001
gene	ENSDARG00000113391	3.2433	-1.69282	17.5427	2.80933e-05	-0.90348	-3.10366	0.00317508
gene	ENSDARG00000020876	-1.0048	7.90362	17.5379	2.81644e-05	6.96088	8.16843	0.00317508
gene	ENSDARG00000094644	-5.81219	-2.66838	17.5317	2.82558e-05	-4.20394	-1.87918	0.00317508
gene	ENSDARG00000086048	-6.28978	-2.10291	17.5322	2.82476e-05	-4.20394	-1.45546	0.00317508
gene	ENSDARG00000054418	-5.7967	-3.12321	17.4839	2.89745e-05	-4.20394	-1.87209	0.00324337
gene	ENSDARG00000070792	1.83568	0.148095	17.4337	2.97497e-05	0.902089	-0.682658	0.00331084
gene	ENSDARG00000043236	1.07469	1.8905	17.4087	3.01439e-05	1.86059	0.983021	0.00331084
gene	ENSDARG00000019962	0.889091	3.65412	17.4141	3.00585e-05	3.81816	3.1239	0.00331084
gene	ENSDARG00000037195	-1.01579	1.97763	17.4127	3.00806e-05	0.984396	2.16383	0.00331084
gene	ENSDARG00000115545	-3.94052	-2.85914	17.4092	3.01369e-05	-3.88468	-1.52285	0.00331084
gene	ENSDARG00000101098	-2.33695	-0.690877	17.3687	3.07858e-05	-2.12068	0.107292	0.00336869
gene	ENSDARG00000014239	-0.970838	4.08935	17.2439	3.28752e-05	3.54503	4.67788	0.00358389
gene	ENSDARG00000015010	4.19518	-2.6519	17.2028	3.35934e-05	-1.42732	-3.72391	0.00364856
gene	ENSDARG00000036376	-1.37547	1.50975	17.0546	3.63199e-05	0.546894	2.06521	0.00393009
gene	ENSDARG00000086647	-1.83797	2.25978	16.9282	3.88214e-05	0.0400818	1.97628	0.00418527
gene	ENSDARG00000069093	-4.82025	-0.675171	16.9094	3.9206e-05	-3.20844	0.824091	0.00421118
gene	ENSDARG00000005574	-3.94631	-2.6334	16.8934	3.95378e-05	-3.88468	-1.52472	0.00423127
gene	ENSDARG00000071692	1.32534	0.398174	16.8818	3.97806e-05	0.882073	-0.214099	0.00424171
gene	ENSDARG00000056084	-2.73897	3.21061	16.8618	4.02021e-05	1.77657	4.73471	0.00427107
gene	ENSDARG00000036295	-1.93609	-1.03359	16.8387	4.06943e-05	-2.04477	-0.187485	0.00430769
gene	ENSDARG00000104697	1.41988	1.08536	16.818	4.11421e-05	1.29076	0.128848	0.00433938
gene	ENSDARG00000061549	-1.78171	-0.490901	16.6939	4.3923e-05	-1.56228	0.220206	0.00461602
gene	ENSDARG00000056530	-0.885321	5.23505	16.661	4.46909e-05	4.60552	5.68769	0.00467989
gene	ENSDARG00000092660	-1.78119	-0.745392	16.6454	4.50588e-05	-1.57856	0.205127	0.00468483
gene	ENSDARG00000077207	-1.8807	0.792069	16.648	4.49984e-05	-1.10081	0.883389	0.00468483
gene	ENSDARG00000053262	2.34946	-1.06804	16.6271	4.54955e-05	0.0788647	-1.79662	0.00471346
gene	ENSDARG00000079622	1.09022	4.07349	16.5725	4.68242e-05	4.24904	3.32807	0.00483397
gene	ENSDARG00000012513	-0.762362	4.56883	16.5594	4.71509e-05	3.81758	4.76121	0.00485056
gene	ENSDARG00000040608	1.1523	0.842205	16.5453	4.75008e-05	1.26931	0.330466	0.00485683
gene	ENSDARG00000100807	-4.25452	-2.42166	16.5436	4.75443e-05	-3.9809	-1.6324	0.00485683
gene	ENSDARG00000061222	-5.70334	-2.98361	16.5348	4.77644e-05	-4.20394	-1.96017	0.00486232
gene	ENSDARG00000078541	-5.69918	-2.41253	16.5182	4.81843e-05	-4.20394	-1.95811	0.00488803
gene	ENSDARG00000090416	-3.31051	-1.93697	16.483	4.9088e-05	-3.62419	-1.34723	0.00496247
gene	ENSDARG00000102561	5.89924	-2.55553	16.4368	5.02984e-05	-2.01065	-4.0452	0.00504489
gene	ENSDARG00000031435	-0.855212	5.07191	16.4356	5.03324e-05	4.53079	5.57995	0.00504489
gene	ENSDARG00000034956	-0.968284	2.52263	16.4322	5.04213e-05	1.87092	2.99541	0.00504489
gene	ENSDARG00000086576	-2.91278	-1.2331	16.3477	5.27213e-05	-3.21393	-0.890086	0.00525701
gene	ENSDARG00000075345	-5.70175	-2.89846	16.3033	5.39712e-05	-4.20394	-1.95914	0.00536334
gene	ENSDARG00000010673	5.70066	-2.82251	16.2526	5.54346e-05	-2.12068	-4.0452	0.00549009
gene	ENSDARG00000033056	-3.38511	-2.35471	16.2257	5.62273e-05	-3.62419	-1.29492	0.00554979
gene	ENSDARG00000103996	-5.69466	-2.47517	16.187	5.73855e-05	-4.20394	-1.95605	0.00564503
gene	ENSDARG00000098398	-1.74825	0.779899	16.1757	5.7731e-05	-0.58846	1.26121	0.00565996
gene	ENSDARG00000068982	3.28123	-2.40213	16.1026	6.00023e-05	-1.52352	-3.46021	0.00585258
gene	ENSDARG00000015793	0.995994	2.04037	16.0996	6.00963e-05	2.49609	1.67394	0.00585258
gene	ENSDARG00000054562	1.32999	1.56115	16.0871	6.04937e-05	1.65156	0.515846	0.00587171
gene	ENSDARG00000037410	0.920258	3.25425	16.016	6.28102e-05	3.44119	2.70299	0.00606286
gene	ENSDARG00000068915	-2.24467	-1.17534	16.0139	6.28781e-05	-2.70013	-0.718407	0.00606286
gene	ENSDARG00000116575	2.52856	-0.0807709	16.0051	6.31724e-05	0.634398	-1.4527	0.0060712
gene	ENSDARG00000009743	-1.58343	-0.607514	15.9453	6.51988e-05	-1.41178	0.203609	0.0062454
gene	ENSDARG00000105384	6.16095	-2.55267	15.9125	6.63401e-05	-1.84775	-4.0452	0.00633396
gene	ENSDARG00000069361	5.71137	-3.07512	15.865	6.80264e-05	-2.11604	-4.0452	0.00645397
gene	ENSDARG00000079216	-5.70563	-2.85588	15.8646	6.80388e-05	-4.20394	-1.96017	0.00645397
gene	ENSDARG00000099424	-2.97021	1.78014	15.8495	6.85852e-05	-2.86995	-0.263207	0.00648474
gene	ENSDARG00000073684	1.50648	0.592807	15.8352	6.91048e-05	1.13088	-0.161925	0.00651279
gene	ENSDARG00000079281	-5.69412	-2.27338	15.8014	7.03514e-05	-4.20394	-1.95605	0.00660896
gene	ENSDARG00000032005	5.85617	-3.08248	15.7948	7.05948e-05	-1.97309	-4.0452	0.00661057
gene	ENSDARG00000062956	-1.19398	0.969251	15.7585	7.1962e-05	0.228097	1.54787	0.00669568
gene	ENSDARG00000060236	-4.07305	-2.506	15.7601	7.1903e-05	-3.88468	-1.39708	0.00669568
gene	ENSDARG00000098348	0.792748	4.03498	15.7128	7.37251e-05	4.5276	3.92697	0.00683794
gene	ENSDARG00000075621	3.25644	-2.11958	15.7025	7.41247e-05	-1.55413	-3.46148	0.00683911
gene	ENSDARG00000099493	1.03872	2.40721	15.7005	7.42059e-05	3.01358	2.1544	0.00683911
gene	ENSDARG00000032639	2.3735	-0.781298	15.6817	7.49449e-05	-1.03937	-2.72202	0.0068855
gene	ENSDARG00000013063	-0.971809	2.46403	15.6509	7.61744e-05	1.75076	2.86893	0.00697378
gene	ENSDARG00000103311	-1.88147	-0.516945	15.6458	7.63832e-05	-1.24326	0.662369	0.00697378
gene	ENSDARG00000113643	2.0814	-0.921207	15.626	7.71868e-05	-0.547989	-2.13658	0.0070252
gene	ENSDARG00000070430	2.06207	-1.09859	15.5923	7.85752e-05	-0.237644	-1.88019	0.00712935
gene	ENSDARG00000098161	-1.86699	0.117078	15.5818	7.90104e-05	-1.54596	0.325688	0.00714665
gene	ENSDARG00000039852	-2.53986	-1.76462	15.5724	7.94073e-05	-2.87526	-0.683383	0.00715906
gene	ENSDARG00000078389	-3.16378	-0.825151	15.5669	7.96377e-05	-2.19661	0.888475	0.00715906
gene	ENSDARG00000113533	-1.11498	2.44753	15.522	8.15489e-05	1.20462	2.46934	0.00730839
gene	ENSDARG00000007129	-1.06167	3.76684	15.4814	8.33207e-05	3.08034	4.31827	0.00744434
gene	ENSDARG00000068991	-6.0326	-0.634099	15.4685	8.38934e-05	-4.20394	-1.73093	0.00747265
gene	ENSDARG00000017398	-2.27263	-1.63873	15.4466	8.48692e-05	-2.6222	-0.580586	0.00753659
gene	ENSDARG00000116047	2.29986	-1.19765	15.4232	8.59271e-05	-0.734069	-2.4516	0.00760741
gene	ENSDARG00000088137	-6.02298	-3.0256	15.3767	8.80661e-05	-4.20394	-1.72898	0.00775057
gene	ENSDARG00000045926	-6.27541	-2.38062	15.3765	8.80747e-05	-4.20394	-1.52844	0.00775057
gene	ENSDARG00000009194	2.70454	-2.11883	15.3594	8.88764e-05	-1.24326	-3.04515	0.00779764
gene	ENSDARG00000037946	5.60034	-2.85763	15.3084	9.13094e-05	-2.20134	-4.0452	0.00798711
gene	ENSDARG00000005980	0.813044	4.30977	15.2833	9.25305e-05	4.46994	3.82676	0.00802187
gene	ENSDARG00000075505	-5.57873	-2.56705	15.2867	9.23649e-05	-4.20394	-2.04192	0.00802187
gene	ENSDARG00000076787	-6.42661	-2.6329	15.2895	9.22264e-05	-4.20394	-1.40973	0.00802187
gene	ENSDARG00000114508	-1.50572	1.97833	15.229	9.52276e-05	0.492414	2.09414	0.00823127
gene	ENSDARG00000095149	5.66497	-2.9326	15.1999	9.67094e-05	-2.14326	-4.0452	0.00826158
gene	ENSDARG00000103907	2.62785	-1.61785	15.2145	9.59636e-05	-1.3039	-3.04515	0.00826158
gene	ENSDARG00000093821	1.30544	1.08556	15.2054	9.64264e-05	1.41199	0.342181	0.00826158
gene	ENSDARG00000031647	-1.59717	4.44562	15.2039	9.65052e-05	3.97246	5.81824	0.00826158
gene	ENSDARG00000116246	-5.55811	-2.02121	15.1824	9.76092e-05	-4.20394	-2.0584	0.00831414
gene	ENSDARG00000016706	1.42419	1.05471	15.1728	9.81079e-05	1.69633	0.4937	0.00833233
gene	ENSDARG00000061778	-3.24748	-2.24225	15.1409	9.97771e-05	-3.62419	-1.40431	0.00844953
gene	ENSDARG00000040041	1.43549	0.83066	15.1348	0.000100101	1.10795	-0.09354	0.00845244
gene	ENSDARG00000039522	0.768276	3.15866	15.1099	0.000101433	3.58545	2.99872	0.0085173
gene	ENSDARG00000054814	-0.947608	2.55241	15.1095	0.000101452	2.12973	3.22626	0.0085173
gene	ENSDARG00000104110	2.67124	-2.01451	14.9855	0.000108341	-0.816295	-2.7232	0.00906962
gene	ENSDARG00000031885	-2.06918	-1.00621	14.9692	0.000109279	-2.39434	-0.492675	0.00912199
gene	ENSDARG00000099631	-0.782015	3.25237	14.9162	0.000112394	2.56567	3.51243	0.00930226
gene	ENSDARG00000078683	-1.42121	2.34914	14.9192	0.000112217	1.43956	3.05163	0.00930226
gene	ENSDARG00000098377	-2.07681	2.14427	14.9206	0.000112131	-0.299478	1.92905	0.00930226
gene	ENSDARG00000094451	-1.88147	-0.334759	14.8959	0.000113609	-1.27849	0.626982	0.00937626
gene	ENSDARG00000095051	-4.26842	-1.3374	14.8772	0.000114742	-4.03219	-1.82987	0.0094431
gene	ENSDARG00000087611	-3.06369	-2.01404	14.8443	0.000116761	-3.40424	-1.08457	0.00958225
gene	ENSDARG00000062565	-1.56612	5.03691	14.8327	0.000117483	4.11001	5.87355	0.0096145
gene	ENSDARG00000028386	0.821963	2.81179	14.801	0.000119473	3.17402	2.53369	0.00975005
gene	ENSDARG00000052037	1.49301	1.06527	14.7657	0.000121728	2.12297	0.872022	0.0098789
gene	ENSDARG00000113274	-1.81487	2.50271	14.767	0.000121644	1.43621	3.43019	0.0098789
gene	ENSDARG00000093019	1.66997	2.59114	14.7365	0.000123627	2.82601	1.2893	0.0100053
gene	ENSDARG00000092094	-5.50885	-2.32454	14.7287	0.00012414	-4.20394	-2.09817	0.010019
gene	ENSDARG00000102669	-2.95304	1.89665	14.7168	0.000124925	-0.137457	2.92311	0.0100366
gene	ENSDARG00000097653	-5.79801	-1.4916	14.715	0.000125046	-3.8788	0.295182	0.0100366
gene	ENSDARG00000040214	-4.01403	-1.5564	14.7079	0.000125519	-3.62419	-0.762875	0.010047
gene	ENSDARG00000033901	-1.911	-0.854967	14.6066	0.000132453	-2.30664	-0.520659	0.010547
gene	ENSDARG00000070050	-2.01167	-0.897126	14.6061	0.000132487	-2.37959	-0.522708	0.010547
gene	ENSDARG00000055874	-1.27823	2.3864	14.5826	0.000134148	1.04425	2.44084	0.0106502
gene	ENSDARG00000075504	-2.29272	-2.22957	14.5715	0.000134942	-2.83099	-0.854103	0.0106842
gene	ENSDARG00000057984	-1.25888	1.20802	14.5557	0.000136073	-0.0987974	1.27867	0.0107446
gene	ENSDARG00000012341	1.52972	0.359018	14.549	0.000136561	1.36598	0.107821	0.010754
gene	ENSDARG00000059075	1.15294	1.13641	14.5398	0.000137228	1.28027	0.347507	0.0107776
gene	ENSDARG00000078567	-0.67654	5.06497	14.4842	0.000141339	4.5173	5.37237	0.0110481
gene	ENSDARG00000093349	-1.5628	-0.87703	14.478	0.000141807	-1.29254	0.309848	0.0110481
gene	ENSDARG00000097414	-4.07513	-0.156886	14.4796	0.000141682	-3.21393	0.100412	0.0110481
gene	ENSDARG00000095350	-3.77102	-2.64112	14.4636	0.000142892	-3.88468	-1.64838	0.011103
gene	ENSDARG00000021462	4.66732	-2.35561	14.4377	0.000144874	-0.965169	-3.7226	0.0112132
gene	ENSDARG00000068782	0.830026	8.20734	14.435	0.000145077	8.38231	7.73141	0.0112132
gene	ENSDARG00000094426	-1.37144	0.487996	14.4155	0.000146593	-0.33797	1.12219	0.0113004
gene	ENSDARG00000032820	2.81976	-1.83978	14.3567	0.000151238	-1.46662	-3.23843	0.0116278
gene	ENSDARG00000103390	2.75194	-2.23759	14.328	0.000153561	-1.22831	-3.0427	0.0117754
gene	ENSDARG00000041492	1.0744	2.13833	14.2802	0.000157516	2.86489	1.96477	0.0120157
gene	ENSDARG00000093005	-2.8394	-2.26659	14.2815	0.000157403	-3.11426	-0.789723	0.0120157
gene	ENSDARG00000005078	0.67281	4.84761	14.2716	0.000158235	5.17513	4.67602	0.012039
gene	ENSDARG00000108525	5.50053	-2.77357	14.2648	0.000158809	-2.28256	-4.0452	0.0120513
gene	ENSDARG00000088915	1.75107	-0.676239	14.2564	0.000159514	-0.271916	-1.64767	0.0120735
gene	ENSDARG00000015907	-1.08615	1.94818	14.2476	0.000160264	0.950635	2.16997	0.0120989
gene	ENSDARG00000095896	2.11727	0.554309	14.2414	0.000160797	1.52134	-0.338062	0.0121079
gene	ENSDARG00000035322	2.90841	0.461898	14.182	0.000165949	0.184281	-2.13231	0.0123999
gene	ENSDARG00000114332	1.17936	1.3068	14.1895	0.000165288	1.6825	0.727978	0.0123999
gene	ENSDARG00000020708	-2.15473	-1.37139	14.184	0.000165777	-2.04932	-0.0294777	0.0123999
gene	ENSDARG00000063295	5.193	1.11368	14.1596	0.000167942	2.76298	-1.79463	0.0125044
gene	ENSDARG00000038788	3.92138	-2.72139	14.1536	0.000168474	-1.65234	-3.72391	0.0125044
gene	ENSDARG00000086490	-1.71825	3.47404	14.1519	0.000168631	1.63252	3.43073	0.0125044
gene	ENSDARG00000007804	-0.764009	6.24917	14.1453	0.000169215	5.56708	6.50888	0.0125159
gene	ENSDARG00000062806	1.27826	1.70376	14.0967	0.000173646	2.01934	0.931461	0.0127789
gene	ENSDARG00000008100	-1.31805	0.238812	14.0972	0.000173598	-0.476756	0.940233	0.0127789
gene	ENSDARG00000021372	-0.633889	4.82947	14.0844	0.000174783	4.32759	5.13514	0.0128303
gene	ENSDARG00000096242	-3.18274	-2.14012	14.0544	0.000177596	-3.62419	-1.46463	0.0130041
gene	ENSDARG00000053509	0.683048	6.00587	14.0338	0.000179558	6.46106	5.956	0.0130769
gene	ENSDARG00000027957	-1.72765	1.62639	14.0298	0.000179933	-0.341977	1.51322	0.0130769
gene	ENSDARG00000074653	-5.72055	-3.16817	14.0299	0.000179926	-4.20394	-1.96223	0.0130769
gene	ENSDARG00000005485	-6.08649	-2.99597	14.0057	0.000182256	-4.20394	-1.6825	0.0132129
gene	ENSDARG00000037174	5.94295	-2.83354	13.9845	0.000184327	-1.84502	-4.0452	0.0133299
gene	ENSDARG00000071414	-1.97944	4.62189	13.946	0.000188138	2.6773	4.88534	0.0135719
gene	ENSDARG00000054255	-1.18958	0.318513	13.9319	0.000189556	0.118368	1.4294	0.0136406
gene	ENSDARG00000093289	6.03487	-2.08507	13.9206	0.000190696	-1.77507	-4.0452	0.0136889
gene	ENSDARG00000094747	-5.9203	-2.84522	13.9092	0.000191859	-4.20394	-1.74805	0.0137386
gene	ENSDARG00000069264	-0.998824	1.79481	13.9036	0.00019243	1.23123	2.40448	0.0137458
gene	ENSDARG00000101701	-5.46612	-2.85442	13.8984	0.000192966	-4.20394	-2.13979	0.0137505
gene	ENSDARG00000077285	5.68355	-3.11351	13.8918	0.000193646	-2.18237	-4.0452	0.0137653
gene	ENSDARG00000055713	2.80514	-2.29348	13.8764	0.000195236	-1.49142	-3.23843	0.0138447
gene	ENSDARG00000109436	-2.38402	-1.3854	13.8429	0.000198746	-3.04624	-1.09119	0.0140595
gene	ENSDARG00000114191	0.865006	2.3992	13.809	0.000202369	2.35455	1.67487	0.0142721
gene	ENSDARG00000030368	0.574988	5.85892	13.8056	0.000202729	5.92713	5.52688	0.0142721
gene	ENSDARG00000007275	-3.06	-0.557378	13.8011	0.000203217	-2.22961	0.530223	0.0142721
gene	ENSDARG00000096603	-1.67187	2.64395	13.777	0.000205836	1.73833	3.55689	0.0144214
gene	ENSDARG00000076781	1.34676	0.0978113	13.7698	0.000206633	0.432761	-0.656765	0.0144425
gene	ENSDARG00000076532	-2.57201	-1.82049	13.7493	0.000208899	-3.20844	-1.18828	0.0145661
gene	ENSDARG00000025797	-0.880779	2.06829	13.7394	0.000210005	1.3558	2.40835	0.0146083
gene	ENSDARG00000069106	2.23372	-1.1399	13.7316	0.000210879	-0.96772	-2.58511	0.0146343
gene	ENSDARG00000053666	5.68763	-3.21267	13.7048	0.000213905	-2.18237	-4.0452	0.0147646
gene	ENSDARG00000026862	0.763612	6.82482	13.7016	0.000214273	6.9788	6.38029	0.0147646
gene	ENSDARG00000036848	-5.83131	-2.89779	13.7033	0.000214083	-4.20394	-1.88019	0.0147646
gene	ENSDARG00000101014	5.51941	-3.1813	13.6853	0.00021614	-2.22961	-4.0452	0.0148233
gene	ENSDARG00000035398	-2.84703	-1.67537	13.6867	0.000215983	-3.04624	-0.728139	0.0148233
gene	ENSDARG00000014302	-2.54572	-0.422518	13.6463	0.000220676	-2.13919	0.221712	0.015099
gene	ENSDARG00000054794	-2.03632	-0.13152	13.6315	0.000222427	-2.22961	-0.348276	0.0151478
gene	ENSDARG00000053493	-5.46085	-2.70182	13.6351	0.000221993	-4.20394	-2.13765	0.0151478
gene	ENSDARG00000096546	2.84902	0.684065	13.5542	0.000231768	1.84207	-0.720797	0.0157473
gene	ENSDARG00000095913	2.01628	-1.5017	13.5358	0.00023405	-0.84903	-2.34632	0.0158654
gene	ENSDARG00000098944	1.48462	-0.277481	13.5269	0.000235171	-0.0479931	-1.23936	0.0159045
gene	ENSDARG00000092354	-1.125	2.35536	13.5046	0.000237984	1.49792	2.78933	0.0160206
gene	ENSDARG00000061634	-2.36615	-1.75598	13.5056	0.00023785	-3.03008	-1.09284	0.0160206
gene	ENSDARG00000099418	-2.08766	1.11802	13.4892	0.000239938	-0.339271	1.86914	0.016115
gene	ENSDARG00000062323	3.75219	-2.2148	13.4741	0.000241879	-1.86551	-3.7226	0.016171
gene	ENSDARG00000087071	-6.32763	-2.02845	13.4773	0.000241472	-4.20394	-1.39165	0.016171
gene	ENSDARG00000040362	-1.44039	0.926173	13.4605	0.000243643	-0.26504	1.29147	0.0162517
gene	ENSDARG00000101517	1.25675	0.993244	13.4381	0.000246563	0.998235	-0.00953585	0.0164091
gene	ENSDARG00000039041	-5.60449	-3.07281	13.4046	0.000251009	-4.20394	-2.04926	0.016667
gene	ENSDARG00000009470	-3.04726	-2.61976	13.4003	0.000251589	-3.60294	-1.50499	0.0166676
gene	ENSDARG00000111795	-5.46416	-2.60483	13.3772	0.000254703	-4.20394	-2.13872	0.0168357
gene	ENSDARG00000061718	-1.34005	-0.250454	13.372	0.000255404	-0.862127	0.552334	0.016844
gene	ENSDARG00000092719	-5.39603	-3.30054	13.3468	0.000258866	-4.20394	-2.18684	0.0170339
gene	ENSDARG00000026499	3.09372	-2.74674	13.3355	0.000260427	-1.68723	-3.46021	0.0170981
gene	ENSDARG00000116216	3.10129	-1.75646	13.3232	0.000262136	-1.70952	-3.47353	0.017146
gene	ENSDARG00000103663	-1.17288	1.3829	13.3219	0.000262331	0.647187	1.95472	0.017146
gene	ENSDARG00000025012	-1.85368	-0.40141	13.2255	0.000276162	-1.82343	-0.0266782	0.0179696
gene	ENSDARG00000089661	-2.64477	-2.05332	13.2276	0.000275854	-2.86995	-0.547182	0.0179696
gene	ENSDARG00000088428	2.82301	-2.26515	13.2163	0.000277531	-1.4874	-3.23718	0.0180186
gene	ENSDARG00000076401	5.34784	-3.11801	13.1911	0.000281282	-2.38943	-4.0452	0.0181936
gene	ENSDARG00000098816	3.24028	-1.98797	13.1861	0.000282033	-1.56635	-3.45893	0.0181936
gene	ENSDARG00000110365	-7.72411	-0.975588	13.1857	0.000282095	-4.20394	-0.269934	0.0181936
gene	ENSDARG00000100599	-5.45697	-2.98567	13.1503	0.00028748	-4.20394	-2.13658	0.0185
gene	ENSDARG00000076005	1.36561	-0.0962877	13.1414	0.000288837	0.65255	-0.457265	0.0185465
gene	ENSDARG00000100127	-2.51391	-1.90317	13.1183	0.000292423	-3.21393	-1.23504	0.0187356
gene	ENSDARG00000076824	-5.32776	-2.19086	13.0913	0.000296667	-4.20394	-2.23773	0.0189659
gene	ENSDARG00000062720	-0.69782	3.63301	13.0825	0.000298075	2.95422	3.81586	0.0190143
gene	ENSDARG00000104083	1.96561	-1.87169	13.0674	0.000300478	-0.760836	-2.23447	0.0191259
gene	ENSDARG00000061017	2.27907	0.278119	13.0484	0.000303548	1.3034	-0.75767	0.0192792
gene	ENSDARG00000012600	-1.82747	-1.28999	13.0316	0.000306272	-1.66619	0.189351	0.0193422
gene	ENSDARG00000095678	-3.56271	-2.34768	13.0301	0.000306526	-3.87613	-1.7981	0.0193422
gene	ENSDARG00000089821	-3.60975	-2.24185	13.0348	0.00030575	-3.88468	-1.8006	0.0193422
gene	ENSDARG00000079752	4.00255	-2.48965	13.0205	0.000308099	-1.71098	-3.72391	0.0193844
gene	ENSDARG00000023713	-5.47695	-3.07299	13.0179	0.000308521	-4.20394	-2.14192	0.0193844
gene	ENSDARG00000114947	3.04434	-2.25052	12.9909	0.000313014	-1.75878	-3.47103	0.0196098
gene	ENSDARG00000013414	-1.89694	2.55929	12.9883	0.000313451	1.3895	3.43205	0.0196098
gene	ENSDARG00000036626	-5.32782	-1.628	12.9759	0.000315525	-4.20394	-2.23773	0.0196974
gene	ENSDARG00000090429	1.17615	0.778496	12.9693	0.000316641	1.14501	0.204115	0.0197249
gene	ENSDARG00000112678	2.364	-2.01954	12.9555	0.000318984	-1.335	-2.92245	0.0198286
gene	ENSDARG00000011961	-0.880835	5.58612	12.8881	0.000330671	4.9158	5.96313	0.0203989
gene	ENSDARG00000070132	-2.77451	-0.713547	12.8866	0.000330951	-1.79737	1.01327	0.0203989
gene	ENSDARG00000096491	-3.59054	-2.81898	12.8983	0.000328883	-3.8788	-1.79234	0.0203989
gene	ENSDARG00000116090	-5.42752	-2.33035	12.8884	0.000330618	-4.20394	-2.16576	0.0203989
gene	ENSDARG00000078042	0.687865	3.44082	12.8793	0.00033223	3.93096	3.41523	0.0204346
gene	ENSDARG00000002304	5.34279	-2.70049	12.8226	0.000342465	-2.39434	-4.0452	0.0209758
gene	ENSDARG00000100594	3.15034	-2.77773	12.8227	0.000342447	-1.66137	-3.46148	0.0209758
gene	ENSDARG00000116769	5.35435	-2.47232	12.8097	0.000344828	-2.38943	-4.0452	0.0210763
gene	ENSDARG00000021086	1.90001	-0.822244	12.7739	0.000351488	-0.398301	-1.87107	0.0214386
gene	ENSDARG00000115013	2.00134	-1.12286	12.7565	0.000354766	-0.626597	-2.14085	0.0215485
gene	ENSDARG00000113961	-1.76906	-0.815777	12.7597	0.000354162	-1.97756	-0.259498	0.0215485
gene	ENSDARG00000011876	-0.868857	1.80266	12.7303	0.000359772	1.19955	2.23835	0.0216794
gene	ENSDARG00000017720	-1.94143	-1.40716	12.7393	0.000358044	-2.01736	-0.143259	0.0216794
gene	ENSDARG00000036558	-2.33484	-1.8583	12.7297	0.000359889	-3.04624	-1.13976	0.0216794
gene	ENSDARG00000104905	-5.32652	-3.02949	12.7371	0.000358467	-4.20394	-2.23876	0.0216794
gene	ENSDARG00000041546	5.53519	-3.26807	12.7142	0.000362881	-2.28256	-4.0452	0.0217717
gene	ENSDARG00000018025	-5.32536	-3.02806	12.7141	0.000362912	-4.20394	-2.23664	0.0217717
gene	ENSDARG00000076404	2.30093	-1.12382	12.6859	0.000368428	-0.25717	-2.04192	0.0220574
gene	ENSDARG00000092949	-5.31391	-2.86149	12.649	0.000375777	-4.20394	-2.24813	0.0224513
gene	ENSDARG00000100663	5.35718	-3.1684	12.6319	0.00037921	-2.38943	-4.0452	0.0225309
gene	ENSDARG00000016725	1.98173	-1.13354	12.6158	0.000382507	-0.435365	-1.97581	0.0225309
gene	ENSDARG00000075492	1.02837	2.02862	12.6192	0.000381814	2.56027	1.73756	0.0225309
gene	ENSDARG00000077080	-0.831406	3.67777	12.6246	0.000380694	2.72494	3.74658	0.0225309
gene	ENSDARG00000088189	-3.88066	-1.30575	12.6237	0.000380892	-3.88468	-1.59039	0.0225309
gene	ENSDARG00000093364	-4.36127	-1.528	12.6167	0.000382317	-3.95502	-1.44548	0.0225309
gene	ENSDARG00000005739	-5.48183	-2.97809	12.6169	0.000382267	-4.20394	-2.14001	0.0225309
gene	ENSDARG00000067797	-5.33693	-3.20172	12.6083	0.000384042	-4.20394	-2.24099	0.0225758
gene	ENSDARG00000102748	3.96667	-1.55529	12.5713	0.00039171	-1.50515	-3.64275	0.0229095
gene	ENSDARG00000039117	-0.544004	6.14285	12.5664	0.00039275	5.61674	6.34302	0.0229095
gene	ENSDARG00000102632	-0.591003	9.56883	12.5659	0.000392856	8.80201	9.58098	0.0229095
gene	ENSDARG00000078088	-1.44991	1.23418	12.5765	0.000390637	0.539723	2.10389	0.0229095
gene	ENSDARG00000102008	1.95473	-1.02061	12.5559	0.000394959	-0.785084	-2.23245	0.0229863
gene	ENSDARG00000098936	-2.5126	-2.12596	12.5505	0.000396098	-3.21393	-1.23331	0.0230068
gene	ENSDARG00000038446	2.04617	-1.43726	12.5452	0.000397234	-0.980676	-2.46127	0.023027
gene	ENSDARG00000113332	2.26648	3.03415	12.5295	0.000400582	4.39024	2.40918	0.0230837
gene	ENSDARG00000061256	-1.57785	-0.765106	12.531	0.000400261	-1.69562	-0.110343	0.0230837
gene	ENSDARG00000043918	-9.18907	1.22986	12.5339	0.000399645	-4.20394	1.12257	0.0230837
gene	ENSDARG00000004049	1.82836	1.16421	12.5195	0.000402732	0.00852337	-1.46555	0.0231407
gene	ENSDARG00000090228	-1.26174	4.95867	12.5175	0.000403157	4.27043	5.71951	0.0231407
gene	ENSDARG00000098809	-2.12198	-1.30423	12.5078	0.000405264	-2.48893	-0.557547	0.0232161
gene	ENSDARG00000030656	5.5507	-2.7877	12.5005	0.00040684	-2.21551	-4.0452	0.0232413
gene	ENSDARG00000088130	1.84018	-1.30248	12.4984	0.000407296	-0.780149	-2.16688	0.0232413
gene	ENSDARG00000094522	0.883277	4.88323	12.4898	0.000409185	4.6567	3.93619	0.0233036
gene	ENSDARG00000056764	-1.91198	-0.605468	12.4567	0.000416488	-1.67883	0.194994	0.0236734
gene	ENSDARG00000037892	3.06519	-2.26567	12.4447	0.000419188	-1.72815	-3.46021	0.0237457
gene	ENSDARG00000007734	1.1946	1.25324	12.4438	0.000419386	1.75734	0.762583	0.0237457
gene	ENSDARG00000104501	3.27762	-1.39207	12.4293	0.000422651	-0.0536695	-2.55058	0.0238843
gene	ENSDARG00000056166	2.20751	-2.05168	12.4033	0.000428576	-1.15642	-2.69334	0.0241723
gene	ENSDARG00000095106	-2.68581	-1.94311	12.376	0.000434893	-3.35442	-1.34309	0.0244814
gene	ENSDARG00000102624	0.861806	1.91714	12.3684	0.000436654	2.17039	1.50257	0.0244888
gene	ENSDARG00000076520	-0.705821	3.66364	12.3682	0.0004367	3.21064	4.08426	0.0244888
gene	ENSDARG00000040644	2.17979	0.531094	12.364	0.0004377	1.1983	-0.768823	0.0244978
gene	ENSDARG00000051914	1.34904	0.875234	12.354	0.000440032	1.93045	0.797878	0.0245812
gene	ENSDARG00000079163	-5.3351	-3.32681	12.3429	0.00044267	-4.20394	-2.23991	0.0246814
gene	ENSDARG00000036125	5.31924	-3.17427	12.327	0.000446461	-2.40414	-4.0452	0.0248453
gene	ENSDARG00000056934	0.78307	2.95133	12.3208	0.00044794	3.15014	2.56526	0.0248803
gene	ENSDARG00000069433	-5.33165	-3.32734	12.3135	0.0004497	-4.20394	-2.23882	0.0249306
gene	ENSDARG00000096141	-1.15059	0.811621	12.3084	0.000450924	0.0575146	1.33088	0.0249511
gene	ENSDARG00000077087	-5.3353	-2.56725	12.297	0.000453691	-4.20394	-2.23991	0.0250568
gene	ENSDARG00000012035	-0.864177	2.8494	12.267	0.000461029	1.95608	3.00593	0.025414
gene	ENSDARG00000097503	2.37042	-1.27576	12.2251	0.0004715	-0.669279	-2.45675	0.0258946
gene	ENSDARG00000101528	-1.92916	-2.00467	12.2251	0.00047152	-2.52862	-0.77838	0.0258946
gene	ENSDARG00000099465	-0.749095	3.32842	12.2119	0.000474847	2.97078	3.90022	0.0259796
gene	ENSDARG00000031483	-3.99822	-1.11029	12.2137	0.000474408	-3.21393	-0.0121005	0.0259796
gene	ENSDARG00000063612	0.788486	4.22267	12.202	0.000477395	4.52464	3.91423	0.0260702
gene	ENSDARG00000055398	2.70064	-2.07649	12.1647	0.000487035	-1.2213	-3.04515	0.026547
gene	ENSDARG00000029720	-5.48143	-3.27165	12.1566	0.000489145	-4.20394	-2.14192	0.0266124
gene	ENSDARG00000008434	0.815939	6.47616	12.1288	0.000496491	6.64247	5.98876	0.026958
gene	ENSDARG00000100280	-2.40761	0.385473	12.1256	0.000497343	-0.542931	2.07913	0.026958
gene	ENSDARG00000096012	1.70281	-0.925638	12.1114	0.00050115	-0.658443	-1.94814	0.0271141
gene	ENSDARG00000012066	-2.25896	-1.93965	12.1032	0.000503348	-3.03548	-1.18657	0.0271827
gene	ENSDARG00000060323	-0.872583	1.69629	12.0982	0.000504716	0.851961	1.87939	0.0272062
gene	ENSDARG00000037773	0.915269	2.16406	12.0795	0.000509796	2.48995	1.75151	0.0274294
gene	ENSDARG00000061936	-1.06048	0.838648	12.0643	0.000513973	-0.021976	1.17707	0.0276034
gene	ENSDARG00000004932	3.01843	-1.08948	12.0584	0.000515583	0.229223	-2.13445	0.0276306
gene	ENSDARG00000031164	-0.74985	5.46906	12.0556	0.000516371	4.61011	5.51869	0.0276306
gene	ENSDARG00000076348	2.31777	-0.488251	12.0451	0.000519288	-0.702221	-2.46014	0.0277358
gene	ENSDARG00000001889	0.836824	6.02718	12.0404	0.00052059	6.31851	5.68366	0.0277546
gene	ENSDARG00000102839	5.67408	-3.24536	11.9819	0.000537204	-2.23786	-4.0452	0.0285614
gene	ENSDARG00000074812	-2.1264	-0.223095	11.9802	0.000537678	-1.77082	0.231113	0.0285614
gene	ENSDARG00000026655	-0.690629	3.60033	11.9644	0.000542265	2.95853	3.83129	0.0287529
gene	ENSDARG00000089227	-1.15777	2.03335	11.9482	0.000547011	1.55793	2.91578	0.0288996
gene	ENSDARG00000039579	-5.32831	-3.32786	11.9485	0.000546912	-4.20394	-2.23773	0.0288996
gene	ENSDARG00000022101	2.27364	0.178354	11.9367	0.000550402	-0.181718	-2.04507	0.0290262
gene	ENSDARG00000007221	2.79543	-1.92959	11.9302	0.000552317	-1.5337	-3.23593	0.0290748
gene	ENSDARG00000075048	-0.6723	5.07628	11.9135	0.000557291	4.40017	5.24505	0.0292839
gene	ENSDARG00000111805	-0.617631	8.13136	11.9043	0.000560044	7.71187	8.50493	0.0293757
gene	ENSDARG00000027391	2.9623	-2.0668	11.8655	0.000571834	-1.80172	-3.46148	0.0299403
gene	ENSDARG00000076043	5.41116	-1.48455	11.8444	0.000578347	-2.37959	-4.0452	0.0302272
gene	ENSDARG00000086222	-0.654437	9.3783	11.8215	0.000585506	8.72486	9.55272	0.0305467
gene	ENSDARG00000010154	3.50644	-3.03227	11.807	0.000590079	-2.04022	-3.7226	0.0307304
gene	ENSDARG00000097080	2.10081	-1.27628	11.803	0.000591342	-0.88153	-2.41648	0.0307414
gene	ENSDARG00000056642	2.43692	-1.35798	11.7869	0.000596496	-1.01495	-2.7232	0.0309529
gene	ENSDARG00000090722	-2.93684	-2.12391	11.7837	0.00059753	-3.62419	-1.65223	0.0309529
gene	ENSDARG00000057571	1.75726	-0.330087	11.755	0.000606812	0.370144	-1.04578	0.0313781
gene	ENSDARG00000089829	5.35714	-2.70585	11.74	0.000611719	-2.37151	-4.0452	0.0315759
gene	ENSDARG00000099554	1.5933	-1.50423	11.729	0.000615333	-0.497168	-1.72409	0.0317065
gene	ENSDARG00000094344	-6.1556	-2.86329	11.717	0.000619318	-4.20394	-1.64188	0.0318556
gene	ENSDARG00000045561	-5.17869	-2.98327	11.7035	0.000623816	-4.20394	-2.3441	0.0320306
gene	ENSDARG00000087714	-1.6083	-0.479526	11.6943	0.000626902	-1.83365	-0.234947	0.0321326
gene	ENSDARG00000099437	-1.96479	-1.69216	11.6794	0.000631944	-2.62728	-0.871928	0.0322778
gene	ENSDARG00000027867	-3.8147	-2.53194	11.6818	0.000631153	-3.88468	-1.65801	0.0322778
gene	ENSDARG00000059348	5.21117	-3.38102	11.6655	0.000636686	-2.49394	-4.0452	0.0324632
gene	ENSDARG00000098115	2.71038	-1.39887	11.5892	0.000663362	-1.51276	-3.18658	0.0337644
gene	ENSDARG00000102737	-1.64011	-1.11731	11.5829	0.000665604	-1.8871	-0.289755	0.0338196
gene	ENSDARG00000062059	-1.01321	0.34432	11.5682	0.000670877	0.258158	1.40553	0.0340283
gene	ENSDARG00000075149	-1.16135	1.91008	11.5492	0.000677786	1.0212	2.31048	0.0343192
gene	ENSDARG00000104064	1.79603	1.46028	11.533	0.000683728	1.43545	-0.0457243	0.0345123
gene	ENSDARG00000101842	1.41894	0.0728292	11.5323	0.000683963	0.569711	-0.588825	0.0345123
gene	ENSDARG00000088251	-2.50026	2.05865	11.5279	0.000685607	1.05564	3.84579	0.0345357
gene	ENSDARG00000074535	-2.99898	-1.35178	11.496	0.00069746	-3.61845	-1.5818	0.0350723
gene	ENSDARG00000086057	5.37327	-3.28383	11.486	0.000701207	-2.321	-4.0452	0.0352001
gene	ENSDARG00000111399	-5.58617	-2.27904	11.4714	0.000706773	-4.20394	-2.04507	0.0354186
gene	ENSDARG00000104635	-1.7482	-1.24153	11.4662	0.000708749	-2.27353	-0.631545	0.0354569
gene	ENSDARG00000104441	2.47737	-2.01207	11.4569	0.000712304	-1.41566	-3.04759	0.0355738
gene	ENSDARG00000052454	0.8256	1.98282	11.449	0.000715344	2.2843	1.63346	0.0356647
gene	ENSDARG00000100089	-5.17566	-2.1398	11.4449	0.000716922	-4.20394	-2.34299	0.0356824
gene	ENSDARG00000003320	-1.0268	2.05379	11.4351	0.000720698	0.409047	1.58168	0.0358094
gene	ENSDARG00000058765	5.2525	-3.31976	11.4247	0.00072474	-2.4839	-4.0452	0.0359491
gene	ENSDARG00000004861	2.3928	-0.274752	11.3973	0.000735503	-0.760879	-2.58511	0.0364211
gene	ENSDARG00000114181	5.18592	-3.35367	11.3221	0.000765884	-2.52163	-4.0452	0.0373017
gene	ENSDARG00000036186	5.14589	-2.60732	11.3217	0.000766053	-2.52384	-4.0452	0.0373017
gene	ENSDARG00000056279	2.91073	-1.72579	11.3419	0.000757774	-1.09363	-3.04759	0.0373017
gene	ENSDARG00000051899	2.56674	-1.32471	11.3225	0.000765739	-1.68723	-3.23718	0.0373017
gene	ENSDARG00000041947	1.86914	1.29376	11.3275	0.000763681	0.821896	-0.72633	0.0373017
gene	ENSDARG00000078425	-0.621118	6.9919	11.3294	0.000762886	6.34936	7.15993	0.0373017
gene	ENSDARG00000039181	-0.796481	2.35979	11.3367	0.0007599	2.12365	3.07859	0.0373017
gene	ENSDARG00000103081	-1.74103	-1.28172	11.3282	0.000763398	-2.13539	-0.465432	0.0373017
gene	ENSDARG00000102277	-2.20679	-1.92233	11.338	0.000759387	-3.04087	-1.23677	0.0373017
gene	ENSDARG00000034173	-5.34462	-3.32629	11.3393	0.000758859	-4.20394	-2.24099	0.0373017
gene	ENSDARG00000091277	-3.82189	-1.39263	11.3121	0.000770032	-3.88468	-1.65897	0.0374331
gene	ENSDARG00000095092	-5.17519	-1.90019	11.3047	0.000773132	-4.20394	-2.34299	0.0375213
gene	ENSDARG00000110142	-2.69472	-1.84893	11.2985	0.000775708	-3.393	-1.4025	0.0375839
gene	ENSDARG00000011941	-0.763542	3.74267	11.2921	0.000778393	3.22668	4.16063	0.0376515
gene	ENSDARG00000100896	2.38559	0.0375583	11.2786	0.000784038	0.153346	-1.71231	0.0377994
gene	ENSDARG00000076891	0.780622	4.99375	11.2793	0.000783758	4.90129	4.28844	0.0377994
gene	ENSDARG00000102332	0.974001	2.98527	11.2603	0.000791832	3.57112	2.75917	0.0380592
gene	ENSDARG00000104613	-0.714023	4.62112	11.2598	0.000792032	3.90702	4.7778	0.0380592
gene	ENSDARG00000053455	3.68164	-2.8354	11.2525	0.00079515	-1.84502	-3.7226	0.0381463
gene	ENSDARG00000057227	1.4664	-1.09278	11.2477	0.00079723	-0.311495	-1.46005	0.0381834
gene	ENSDARG00000112928	1.90617	-0.782661	11.2363	0.000802138	-0.51214	-1.95502	0.0383556
gene	ENSDARG00000036107	-0.80252	3.24802	11.2318	0.000804088	2.84967	3.8034	0.038386
gene	ENSDARG00000074056	-2.85812	-1.60557	11.2255	0.000806823	-3.39445	-1.22899	0.0384537
gene	ENSDARG00000037845	-2.83934	-1.09158	11.2196	0.0008094	-2.76095	-0.350831	0.0385137
gene	ENSDARG00000104436	2.94789	-1.70544	11.2098	0.000813683	-1.81042	-3.46148	0.0385918
gene	ENSDARG00000062780	-1.91814	-2.00952	11.2119	0.000812725	-2.6222	-0.916058	0.0385918
gene	ENSDARG00000036505	-2.46003	-2.32938	11.2027	0.000816796	-3.21393	-1.28791	0.0386767
gene	ENSDARG00000105029	-5.18552	-2.93633	11.1953	0.000820056	-4.20394	-2.34632	0.0387682
gene	ENSDARG00000100892	3.41757	-2.98299	11.19	0.000822384	-2.11139	-3.72391	0.0388155
gene	ENSDARG00000093804	1.67099	-0.417885	11.1842	0.000824966	-0.222078	-1.52285	0.0388745
gene	ENSDARG00000093862	3.42022	-2.74071	11.1765	0.000828404	-2.11139	-3.7226	0.0389737
gene	ENSDARG00000099913	0.784342	1.57322	11.1609	0.000835388	2.09706	1.50179	0.0392391
gene	ENSDARG00000012449	-0.844439	1.3031	11.1525	0.000839198	0.971585	1.97143	0.0393547
gene	ENSDARG00000027602	2.58486	-2.46894	11.1428	0.000843566	-1.67462	-3.23843	0.0394962
gene	ENSDARG00000056210	-1.39376	-0.440173	11.1202	0.000853904	-1.45873	-0.0188463	0.0399163
gene	ENSDARG00000114529	1.07897	3.98188	11.1062	0.000860403	4.04676	3.19255	0.0401273
gene	ENSDARG00000074501	-1.40339	1.06967	11.1045	0.000861167	0.291077	1.84716	0.0401273
gene	ENSDARG00000089109	-1.38822	1.21886	11.0884	0.000868687	0.307582	1.81745	0.0404133
gene	ENSDARG00000040295	-0.886773	9.30732	11.0767	0.000874195	8.6421	9.70196	0.0406049
gene	ENSDARG00000087717	0.73713	2.10988	11.0604	0.00088192	2.32958	1.7824	0.0408987
gene	ENSDARG00000104231	-0.939203	1.04232	11.0381	0.000892577	0.47313	1.56199	0.0412681
gene	ENSDARG00000030967	-5.49303	-3.27112	11.0378	0.00089271	-4.20394	-2.14299	0.0412681
gene	ENSDARG00000079840	3.58431	-3.06575	11.0159	0.000903314	-2.01277	-3.72391	0.0416923
gene	ENSDARG00000055133	1.04235	1.09556	10.9945	0.000913821	0.659088	-0.161925	0.0419783
gene	ENSDARG00000074456	-1.46116	-0.545868	10.9953	0.000913437	-1.7538	-0.288741	0.0419783
gene	ENSDARG00000041378	-5.85293	-3.07827	11.0003	0.000910971	-4.20394	-1.78964	0.0419783
gene	ENSDARG00000097091	2.05872	-0.665547	10.9911	0.000915492	-0.434919	-2.052	0.041989
gene	ENSDARG00000022254	-3.52937	-2.47166	10.9771	0.000922464	-3.88468	-1.8812	0.0422425
gene	ENSDARG00000008790	-0.715878	3.90539	10.9628	0.000929581	3.0382	3.93411	0.0425018
gene	ENSDARG00000013134	5.79026	-3.10879	10.944	0.000939075	-2.17284	-4.0452	0.0428688
gene	ENSDARG00000071396	0.833638	4.69665	10.9332	0.000944586	4.99009	4.35717	0.0430531
gene	ENSDARG00000043781	-0.931639	2.13132	10.92	0.000951313	1.07955	2.1731	0.0432921
gene	ENSDARG00000087697	-0.897132	6.44826	10.8967	0.000963332	5.8684	6.92481	0.0437709
gene	ENSDARG00000079271	1.28055	-0.594133	10.888	0.000967894	0.210136	-0.79249	0.0438419
gene	ENSDARG00000009844	0.869688	2.46882	10.8889	0.000967442	2.42019	1.74669	0.0438419
gene	ENSDARG00000088595	-1.62798	0.0774704	10.8651	0.000979955	-0.862127	0.859458	0.0443195
gene	ENSDARG00000062770	-0.905808	1.04484	10.8505	0.000987695	0.425124	1.47858	0.0445977
gene	ENSDARG00000086391	-2.57658	-2.50565	10.8477	0.00098916	-3.40424	-1.52378	0.0445977
gene	ENSDARG00000069105	-0.653139	6.02962	10.8448	0.000990741	5.54825	6.38052	0.0446001
gene	ENSDARG00000004763	-1.17206	2.29234	10.8384	0.000994169	1.85258	3.19146	0.0446498
gene	ENSDARG00000054319	-2.92936	-2.56288	10.837	0.0009949	-3.38735	-1.19423	0.0446498
gene	ENSDARG00000057417	1.42409	-0.453271	10.8225	0.00100274	0.10575	-1.0466	0.0449324
gene	ENSDARG00000060197	-0.596877	3.70982	10.7987	0.00101569	3.28355	4.06001	0.0454432
gene	ENSDARG00000009942	2.09491	-1.83461	10.7715	0.00103073	-1.28876	-2.72437	0.0460115
gene	ENSDARG00000087575	-2.15497	-2.17568	10.7701	0.00103154	-2.74025	-0.828239	0.0460115
gene	ENSDARG00000100332	1.51321	0.709361	10.7542	0.00104041	1.50649	0.220708	0.0463363
gene	ENSDARG00000087013	1.17208	0.811515	10.7416	0.00104752	0.954991	-0.000452579	0.0464231
gene	ENSDARG00000004184	-0.750317	3.43138	10.7395	0.00104872	2.84174	3.74291	0.0464231
gene	ENSDARG00000092764	-2.22328	3.37707	10.7428	0.00104686	2.36595	4.78985	0.0464231
gene	ENSDARG00000037178	-6.03343	-2.47343	10.7451	0.00104556	-4.20394	-1.72898	0.0464231
gene	ENSDARG00000078504	1.7517	-0.662136	10.7233	0.00105794	-0.5421	-1.87614	0.0467608
gene	ENSDARG00000002037	-1.04372	0.832879	10.7205	0.00105954	0.407498	1.60037	0.0467608
gene	ENSDARG00000061603	1.74248	-1.39746	10.7142	0.00106316	-0.83511	-2.13658	0.0468494
gene	ENSDARG00000105588	-5.04737	-3.43152	10.7089	0.00106622	-4.20394	-2.43327	0.0469135
gene	ENSDARG00000079456	1.28971	-0.304681	10.6934	0.0010752	0.149814	-0.870696	0.0472376
gene	ENSDARG00000024204	1.3021	0.0438467	10.6823	0.00108167	0.376052	-0.689184	0.0474507
gene	ENSDARG00000110114	-5.07506	-2.88598	10.6591	0.0010953	-4.20394	-2.41338	0.0479765
gene	ENSDARG00000059763	-1.68968	-0.190131	10.6367	0.00110866	-1.28055	0.439345	0.0484889
gene	ENSDARG00000104043	-1.02442	2.52321	10.6223	0.00111735	1.53713	2.72332	0.0487959
gene	ENSDARG00000096153	2.72989	1.64708	10.6175	0.00112025	2.76051	0.313157	0.0488145
gene	ENSDARG00000089904	1.77698	-1.65578	10.616	0.00112112	-0.714034	-2.03982	0.0488145
gene	ENSDARG00000009136	-1.01796	3.89255	10.6116	0.00112383	3.36803	4.52768	0.0488599
gene	ENSDARG00000076914	-2.70015	-1.56194	10.6032	0.00112893	-2.88585	-0.629621	0.0490087
gene	ENSDARG00000098515	-0.74657	1.86629	10.5902	0.0011369	1.77017	2.67322	0.0492082
gene	ENSDARG00000005561	-0.96599	1.90964	10.5925	0.00113548	0.942605	2.075	0.0492082
gene	ENSDARG00000114577	1.06639	1.84689	10.5674	0.00115101	1.80237	0.954886	0.0497456
gene	ENSDARG00000091972	1.91352	0.898326	10.5554	0.00115849	0.978772	-0.608391	0.049921
gene	ENSDARG00000058558	-1.55224	0.365732	10.557	0.0011575	-0.278176	1.37988	0.049921
gene	ENSDARG00000090033	3.20825	-2.29361	10.5477	0.00116335	-2.06082	-3.65093	0.0499831
gene	ENSDARG00000087483	0.929777	1.79424	10.55	0.00116187	2.06583	1.3538	0.0499831
gene	ENSDARG00000045277	5.01829	-3.27368	10.5408	0.0011677	-2.6222	-4.0452	0.0500092
gene	ENSDARG00000052894	-0.994442	0.74245	10.5429	0.00116637	0.170478	1.29367	0.0500092
gene	ENSDARG00000089889	-2.84085	-2.35442	10.5386	0.0011691	-3.62419	-1.74046	0.0500092
gene	ENSDARG00000009939	0.750338	3.33314	10.5156	0.00118373	3.84961	3.30459	0.0504872
gene	ENSDARG00000102433	-2.54037	-2.09704	10.5176	0.00118242	-3.393	-1.51632	0.0504872
gene	ENSDARG00000069017	-2.53713	-1.9071	10.4996	0.00119399	-3.04624	-0.948758	0.0508506
gene	ENSDARG00000076011	-0.653962	2.99226	10.477	0.00120869	2.39266	3.21758	0.051402
gene	ENSDARG00000037154	-0.945918	2.07461	10.4734	0.00121103	1.24449	2.35124	0.0514263
gene	ENSDARG00000077266	-3.49876	-3.06861	10.4695	0.0012136	-3.92823	-2.01409	0.0514608
gene	ENSDARG00000037932	-1.05051	1.29428	10.4515	0.00122548	0.659088	1.88186	0.0518894
gene	ENSDARG00000102453	-1.06363	3.50396	10.4474	0.0012282	2.71927	3.94054	0.0519294
gene	ENSDARG00000056838	5.06955	-2.8908	10.4351	0.00123643	-2.6018	-4.0452	0.0522017
gene	ENSDARG00000015064	2.51	-2.46933	10.4267	0.00124208	-1.73671	-3.23843	0.0523644
gene	ENSDARG00000058871	-0.97252	1.26946	10.4015	0.00125912	0.792894	1.94465	0.0530064
gene	ENSDARG00000111303	-5.03875	-3.31892	10.3987	0.00126102	-4.20394	-2.44506	0.05301
gene	ENSDARG00000078728	5.04633	-2.48573	10.3896	0.00126729	-2.60915	-4.0452	0.0531969
gene	ENSDARG00000043722	3.49965	-2.34485	10.3633	0.00128548	-1.24333	-3.46148	0.0538832
gene	ENSDARG00000058564	5.18396	-2.96664	10.3567	0.00129007	-2.52966	-4.0452	0.0539352
gene	ENSDARG00000100132	-1.17677	0.371297	10.3562	0.00129041	-0.164965	1.12007	0.0539352
gene	ENSDARG00000074761	1.29863	1.15709	10.3453	0.00129802	1.29401	0.220708	0.0541758
gene	ENSDARG00000037099	3.08318	2.78381	10.3325	0.00130708	2.6798	-0.0739816	0.0544758
gene	ENSDARG00000014817	0.519155	5.83067	10.3112	0.00132226	5.99474	5.66153	0.0550302
gene	ENSDARG00000026704	-2.66392	-1.48257	10.3004	0.00132999	-2.38712	0.110184	0.0552729
gene	ENSDARG00000070953	5.07738	-3.43688	10.2978	0.00133189	-2.6018	-4.0452	0.0552735
gene	ENSDARG00000024488	0.900574	1.13961	10.2872	0.00133953	0.951367	0.260195	0.0555118
gene	ENSDARG00000094458	5.23529	-3.33732	10.2751	0.00134838	-2.41876	-4.0452	0.0557993
gene	ENSDARG00000011809	-0.831132	1.45324	10.2594	0.00135987	1.05992	2.04667	0.0561952
gene	ENSDARG00000014103	5.08026	-3.37817	10.2451	0.00137049	-2.6018	-4.0452	0.0565539
gene	ENSDARG00000021997	5.062	-3.32375	10.2215	0.00138813	-2.60691	-4.0452	0.0571763
gene	ENSDARG00000079891	-0.809124	3.68785	10.2197	0.00138949	2.56314	3.52079	0.0571763
gene	ENSDARG00000052677	-1.891	-0.265169	10.2167	0.00139172	-1.7303	0.0840261	0.0571878
gene	ENSDARG00000077620	2.52177	-1.78802	10.2107	0.00139632	-1.70818	-3.23843	0.057296
gene	ENSDARG00000039657	1.45027	-0.548863	10.2008	0.0014038	-0.149945	-1.29317	0.0574475
gene	ENSDARG00000055046	1.29783	-0.181249	10.2006	0.00140394	0.339743	-0.689184	0.0574475
gene	ENSDARG00000114738	5.24375	-3.35367	10.1853	0.00141568	-2.52163	-4.0452	0.0578469
gene	ENSDARG00000093453	5.01689	-3.3297	10.1718	0.00142603	-2.6222	-4.0452	0.0580262
gene	ENSDARG00000055786	-0.984369	4.18757	10.1719	0.00142595	3.21417	4.38344	0.0580262
gene	ENSDARG00000075054	-1.55055	-1.41048	10.1745	0.00142398	-2.02652	-0.522708	0.0580262
gene	ENSDARG00000112045	-0.931863	2.02517	10.1631	0.00143277	1.29923	2.40702	0.0582193
gene	ENSDARG00000095070	1.53634	-0.974768	10.1483	0.00144434	-0.517355	-1.68274	0.058608
gene	ENSDARG00000003512	-1.17227	-0.113889	10.1336	0.00145589	-0.357521	0.918707	0.0589949
gene	ENSDARG00000114583	1.68809	-1.65987	10.1205	0.00146629	-0.889811	-2.13872	0.059334
gene	ENSDARG00000023445	-1.61941	-0.35258	10.1044	0.00147913	-1.47056	0.143174	0.0597707
gene	ENSDARG00000017329	3.33107	-2.73372	10.089	0.0014916	-2.18712	-3.7226	0.0601915
gene	ENSDARG00000074867	0.926641	1.81278	10.086	0.00149402	1.89726	1.18942	0.060206
gene	ENSDARG00000062165	-1.22979	1.04753	10.0779	0.00150058	-0.0794381	1.26416	0.0603869
gene	ENSDARG00000026444	-0.870853	1.04443	10.0709	0.00150626	0.539833	1.55759	0.060532
gene	ENSDARG00000004529	-3.28573	-2.85685	10.053	0.00152103	-3.88468	-2.04507	0.0610418
gene	ENSDARG00000095868	5.53666	-3.30963	10.0385	0.00153301	-2.35506	-4.0452	0.0611028
gene	ENSDARG00000114086	1.05134	1.87057	10.0422	0.00152993	2.4342	1.60282	0.0611028
gene	ENSDARG00000056128	-1.05855	0.925563	10.0483	0.00152489	-0.0243812	1.15666	0.0611028
gene	ENSDARG00000059001	-1.09013	1.23064	10.0436	0.00152877	0.530702	1.73813	0.0611028
gene	ENSDARG00000087601	-5.01884	-3.44268	10.0401	0.00153165	-4.20394	-2.46127	0.0611028
gene	ENSDARG00000043848	-0.534054	4.33354	10.0138	0.00155373	3.99966	4.71327	0.0617812
gene	ENSDARG00000031756	-0.949211	0.560851	10.0132	0.00155426	-0.0915298	0.989186	0.0617812
gene	ENSDARG00000016594	4.97859	-2.54701	9.9968	0.00156812	-2.6374	-4.0452	0.0622397
gene	ENSDARG00000076255	1.43626	-0.534064	9.99204	0.00157218	0.228952	-0.890373	0.0622397
gene	ENSDARG00000091584	-1.45257	2.06083	9.99423	0.00157031	0.0723421	1.61859	0.0622397
gene	ENSDARG00000116625	1.57434	1.18644	9.98476	0.00157841	0.968928	-0.2898	0.0624016
gene	ENSDARG00000001835	1.23889	0.0676917	9.96742	0.00159334	0.314951	-0.647588	0.0628917
gene	ENSDARG00000025325	-1.09654	2.10515	9.96538	0.00159511	1.55971	2.79547	0.0628917
gene	ENSDARG00000101279	-0.893189	1.4449	9.95536	0.00160382	0.801191	1.85841	0.0631497
gene	ENSDARG00000007465	5.01609	-3.44488	9.94756	0.00161063	-2.6222	-4.0452	0.0631626
gene	ENSDARG00000112931	0.800807	4.35393	9.95043	0.00160812	4.42426	3.83282	0.0631626
gene	ENSDARG00000105714	-3.28831	-2.89728	9.94933	0.00160908	-3.88468	-2.04612	0.0631626
gene	ENSDARG00000070775	2.76058	-2.70512	9.93122	0.00162499	-1.95966	-3.46148	0.0636404
gene	ENSDARG00000098890	-5.02353	-3.44216	9.92837	0.0016275	-4.20394	-2.4624	0.0636534
gene	ENSDARG00000114437	-1.66079	-1.88006	9.92203	0.00163312	-2.31144	-0.759169	0.0637877
gene	ENSDARG00000101274	3.02814	-0.632028	9.91021	0.00164365	-0.678012	-2.77908	0.0641132
gene	ENSDARG00000104558	-2.11378	-2.07778	9.90258	0.00165047	-2.85575	-1.07347	0.0642935
gene	ENSDARG00000037554	1.81989	-1.31711	9.88184	0.00166918	-1.01511	-2.34521	0.0649358
gene	ENSDARG00000089005	-5.01098	-2.90027	9.87378	0.00167651	-4.20394	-2.45901	0.0651341
gene	ENSDARG00000062462	5.09907	-2.97775	9.86635	0.00168329	-2.6018	-4.0452	0.0652539
gene	ENSDARG00000036058	-3.29601	-2.60073	9.86551	0.00168406	-3.88468	-2.04926	0.0652539
gene	ENSDARG00000042707	2.55765	-2.345	9.85372	0.00169489	-1.71957	-3.23843	0.0655867
gene	ENSDARG00000078973	-0.916894	4.3556	9.84564	0.00170235	3.58649	4.68472	0.0657881
gene	ENSDARG00000077550	3.31473	-3.11716	9.83045	0.00171646	-2.19187	-3.71971	0.0660713
gene	ENSDARG00000074390	2.80624	-2.62831	9.83519	0.00171204	-1.93718	-3.46148	0.0660713
gene	ENSDARG00000054537	0.597536	5.82776	9.83279	0.00171428	5.86246	5.42923	0.0660713
gene	ENSDARG00000071662	-1.94293	-1.90936	9.81792	0.00172819	-2.6374	-0.911358	0.0664353
gene	ENSDARG00000068923	-3.28013	-2.63895	9.80561	0.0017398	-3.88468	-2.04192	0.0667936
gene	ENSDARG00000029482	1.12028	1.46325	9.79373	0.00175108	0.952075	0.0182248	0.0671385
gene	ENSDARG00000115857	1.46975	-0.993384	9.76945	0.00177435	-0.458662	-1.5797	0.0679417
gene	ENSDARG00000019702	-0.66475	8.06242	9.76051	0.001783	7.37742	8.22356	0.0681835
gene	ENSDARG00000103405	1.28154	-0.594776	9.75155	0.00179172	-0.194808	-1.17832	0.0684271
gene	ENSDARG00000040033	-1.04208	0.742557	9.74645	0.00179669	-0.417675	0.735803	0.0685277
gene	ENSDARG00000004078	-0.800776	2.36183	9.72996	0.00181289	1.76484	2.71838	0.0690552
gene	ENSDARG00000058162	1.4708	-1.31824	9.71947	0.00182326	-0.689875	-1.79662	0.0691797
gene	ENSDARG00000044047	1.27831	-0.689052	9.71952	0.00182321	-0.0991331	-1.08622	0.0691797
gene	ENSDARG00000038957	-0.709035	4.19192	9.72098	0.00182176	3.56603	4.44274	0.0691797
gene	ENSDARG00000023722	2.15675	-1.97986	9.7152	0.0018275	-1.44687	-2.8782	0.0692507
gene	ENSDARG00000008032	-0.57931	5.06667	9.708	0.00183467	4.25822	5.00939	0.0694325
gene	ENSDARG00000033662	-0.621236	4.24554	9.69411	0.0018486	3.73075	4.51695	0.0698688
gene	ENSDARG00000055705	3.60771	-2.529	9.67529	0.00186763	-2.01277	-3.72391	0.0704971
gene	ENSDARG00000042535	3.0611	-2.72529	9.66256	0.00188061	-1.77233	-3.46148	0.0708953
gene	ENSDARG00000091932	-0.72732	2.78559	9.6576	0.0018857	2.15648	3.05002	0.0709957
gene	ENSDARG00000095440	4.89769	-3.25498	9.65013	0.00189338	-2.70397	-4.0452	0.071193
gene	ENSDARG00000060500	0.746257	2.26695	9.63737	0.00190658	2.53206	1.96398	0.0715052
gene	ENSDARG00000018048	-3.53864	-2.53603	9.6381	0.00190583	-3.88468	-1.88019	0.0715052
gene	ENSDARG00000023228	0.857613	1.08815	9.63465	0.00190941	1.33309	0.685153	0.0715196
gene	ENSDARG00000037805	2.74397	-2.98989	9.63043	0.0019138	-1.96862	-3.46148	0.0715921
gene	ENSDARG00000098036	-4.99636	-1.70762	9.61973	0.00192498	-4.20394	-2.45562	0.0719183
gene	ENSDARG00000112103	3.28115	-2.46341	9.61091	0.00193424	-2.22738	-3.7226	0.0721722
gene	ENSDARG00000038378	2.78173	-2.34687	9.58323	0.00196363	-1.95069	-3.46021	0.0730208
gene	ENSDARG00000045983	-1.19626	-0.0729004	9.58243	0.00196448	-1.2213	0.0426207	0.0730208
gene	ENSDARG00000035895	-1.56529	-1.19109	9.58518	0.00196154	-2.0584	-0.5534	0.0730208
gene	ENSDARG00000028173	1.49598	-1.14326	9.56252	0.00198591	-0.577473	-1.72213	0.0737233
gene	ENSDARG00000100909	5.14397	-2.99009	9.5366	0.00201414	-2.59667	-4.0452	0.0742257
gene	ENSDARG00000101461	4.95056	-3.46752	9.5448	0.00200517	-2.66777	-4.0452	0.0742257
gene	ENSDARG00000070627	4.92457	-3.35966	9.53994	0.00201048	-2.68969	-4.0452	0.0742257
gene	ENSDARG00000059327	1.38919	0.463638	9.54413	0.0020059	1.30381	0.0774992	0.0742257
gene	ENSDARG00000045367	0.5304	7.02906	9.5396	0.00201085	7.08211	6.74136	0.0742257
gene	ENSDARG00000091627	-1.96966	-1.70404	9.53611	0.00201468	-2.76872	-1.07409	0.0742257
gene	ENSDARG00000098212	-4.95985	-3.46272	9.52417	0.00202783	-4.20394	-2.50132	0.074616
gene	ENSDARG00000059950	-0.928822	1.53671	9.51861	0.00203398	1.34794	2.41459	0.0747482
gene	ENSDARG00000012030	4.96216	-3.39208	9.51327	0.00203991	-2.6374	-4.0452	0.074788
gene	ENSDARG00000052244	0.544884	6.55016	9.51072	0.00204275	6.64332	6.28266	0.074788
gene	ENSDARG00000045760	-1.28045	1.28039	9.51084	0.00204261	0.148914	1.5254	0.074788
gene	ENSDARG00000022518	1.43873	-0.224889	9.506	0.00204801	0.536104	-0.609806	0.074887
gene	ENSDARG00000105093	5.11458	-3.43688	9.50103	0.00205356	-2.6018	-4.0452	0.0749961
gene	ENSDARG00000016391	1.66343	-1.06757	9.49465	0.00206072	-1.0324	-2.24099	0.0751108
gene	ENSDARG00000102353	-0.67246	3.61701	9.49365	0.00206184	3.11462	3.96901	0.0751108
gene	ENSDARG00000006775	2.43542	-2.43637	9.49094	0.00206489	-1.80172	-3.23718	0.0751279
gene	ENSDARG00000109375	5.14676	-2.49692	9.47978	0.00207749	-2.59667	-4.0452	0.0754923
gene	ENSDARG00000035175	-0.907651	5.8086	9.47171	0.00208665	5.25979	6.34883	0.0757312
gene	ENSDARG00000098414	-0.686321	4.17403	9.46516	0.00209411	3.74935	4.62039	0.0757476
gene	ENSDARG00000091513	-2.22665	-1.81885	9.46449	0.00209488	-3.19741	-1.45637	0.0757476
gene	ENSDARG00000039243	-2.72567	-0.335743	9.46519	0.00209408	-1.46725	1.4216	0.0757476
gene	ENSDARG00000078167	1.55504	-0.198557	9.44511	0.00211713	-0.494122	-1.66937	0.0763291
gene	ENSDARG00000097521	1.18788	0.785308	9.44366	0.0021188	1.31014	0.295277	0.0763291
gene	ENSDARG00000012968	-1.6224	3.66627	9.44582	0.00211631	2.46965	4.2499	0.0763291
gene	ENSDARG00000004059	1.04942	0.648411	9.42139	0.00214469	0.983629	0.149929	0.0771667
gene	ENSDARG00000075177	4.95868	-3.39122	9.40726	0.00216128	-2.6374	-4.0452	0.0776677
gene	ENSDARG00000112606	-2.17925	-1.48275	9.40456	0.00216446	-2.6843	-0.820765	0.0776867
gene	ENSDARG00000112944	-2.13943	-1.19261	9.387	0.00218529	-3.03008	-1.29405	0.078338
gene	ENSDARG00000104547	5.11923	-3.43688	9.38061	0.00219292	-2.6018	-4.0452	0.0784207
gene	ENSDARG00000041904	0.60144	3.25715	9.38057	0.00219297	3.29994	2.87981	0.0784207
gene	ENSDARG00000068926	2.06773	-1.64591	9.37556	0.00219897	-1.14201	-2.58741	0.0785393
gene	ENSDARG00000076644	4.84328	-3.50326	9.3653	0.00221132	-2.74025	-4.0452	0.078685
gene	ENSDARG00000023759	0.982417	1.29686	9.36423	0.00221261	1.65242	0.859924	0.078685
gene	ENSDARG00000027903	0.655708	3.21834	9.36303	0.00221406	3.18587	2.70279	0.078685
gene	ENSDARG00000001781	-0.621846	4.64996	9.361	0.00221652	4.0078	4.79509	0.078685
gene	ENSDARG00000035137	-5.03946	-3.16646	9.36949	0.00220627	-4.20394	-2.46466	0.078685
gene	ENSDARG00000104114	2.13909	-1.47261	9.35655	0.0022219	-1.2213	-2.72554	0.0787102
gene	ENSDARG00000061773	1.19173	0.874906	9.35152	0.002228	0.974302	-0.0199645	0.0787102
gene	ENSDARG00000100757	-1.16172	0.483214	9.35313	0.00222605	-0.335155	0.939742	0.0787102
gene	ENSDARG00000102574	-2.30409	-2.1832	9.35388	0.00222514	-2.75966	-0.819076	0.0787102
gene	ENSDARG00000103470	1.81167	-1.07132	9.34056	0.00224137	-0.51214	-1.87107	0.0790867
gene	ENSDARG00000078187	5.12107	-3.43688	9.33111	0.00225296	-2.6018	-4.0452	0.0793997
gene	ENSDARG00000101010	-1.00176	0.145983	9.31574	0.00227193	-0.464242	0.662118	0.079972
gene	ENSDARG00000004753	-2.06083	-0.420276	9.31088	0.00227797	-1.89641	0.0306431	0.0799918
gene	ENSDARG00000045748	-4.82747	-2.47039	9.3128	0.00227559	-4.20394	-2.58511	0.0799918
gene	ENSDARG00000018797	1.78748	7.05202	9.29969	0.00229192	6.9069	5.31912	0.0800148
gene	ENSDARG00000074443	1.01666	1.54079	9.30163	0.00228949	1.763	0.940938	0.0800148
gene	ENSDARG00000036155	0.883547	0.73986	9.29938	0.00229232	1.43329	0.733452	0.0800148
gene	ENSDARG00000101071	-1.58459	0.520197	9.30558	0.00228457	-0.23619	1.3971	0.0800148
gene	ENSDARG00000103283	-2.19781	-2.44709	9.30451	0.0022859	-2.93677	-1.12703	0.0800148
gene	ENSDARG00000013415	0.988688	0.88984	9.29205	0.00230151	1.67351	0.869538	0.0802119
gene	ENSDARG00000104958	-0.806511	3.53074	9.2905	0.00230346	2.59245	3.54657	0.0802119
gene	ENSDARG00000002298	-4.82742	-3.22107	9.2777	0.0023196	-4.20394	-2.58511	0.0806779
gene	ENSDARG00000058940	4.82704	-3.38738	9.26288	0.00233845	-2.75062	-4.0452	0.0811403
gene	ENSDARG00000033757	1.45431	0.0647465	9.26304	0.00233824	-0.151524	-1.2679	0.0811403
gene	ENSDARG00000101457	4.87308	-3.43808	9.24663	0.00235929	-2.72984	-4.0452	0.0815957
gene	ENSDARG00000103450	1.15084	0.211939	9.24612	0.00235995	0.224962	-0.689184	0.0815957
gene	ENSDARG00000086288	-3.43307	-3.02599	9.24986	0.00235513	-3.88468	-1.96326	0.0815957
gene	ENSDARG00000098899	4.83555	-3.32885	9.23881	0.00236938	-2.74544	-4.0452	0.0818249
gene	ENSDARG00000075730	4.84629	-3.12084	9.22688	0.00238487	-2.74025	-4.0452	0.0821655
gene	ENSDARG00000107526	1.52753	-1.54585	9.22748	0.00238409	-0.352126	-1.52099	0.0821655
gene	ENSDARG00000012694	2.68167	-2.703	9.22047	0.00239324	-2.02652	-3.46021	0.0823567
gene	ENSDARG00000074691	2.67944	-2.50061	9.21362	0.00240222	-2.02652	-3.46148	0.0825263
gene	ENSDARG00000088377	0.832947	3.04454	9.21087	0.00240582	3.79757	3.15681	0.0825263
gene	ENSDARG00000077769	-1.94858	-1.50217	9.21025	0.00240664	-2.88585	-1.23504	0.0825263
gene	ENSDARG00000045788	4.86008	-3.16813	9.20314	0.00241601	-2.73505	-4.0452	0.0826535
gene	ENSDARG00000046091	2.20557	-2.24206	9.20482	0.00241378	-1.67041	-3.04515	0.0826535
gene	ENSDARG00000069185	2.20933	-2.37553	9.19567	0.00242588	-1.22653	-2.7203	0.0828123
gene	ENSDARG00000044975	-1.54143	0.162347	9.19534	0.00242632	-0.487831	1.13315	0.0828123
gene	ENSDARG00000108535	-4.8323	-3.22106	9.18718	0.00243716	-4.20394	-2.58741	0.0830853
gene	ENSDARG00000019420	-0.605345	6.79562	9.18419	0.00244115	6.72156	7.49701	0.0831244
gene	ENSDARG00000006901	-2.21218	-1.87877	9.18042	0.00244618	-2.74544	-0.84197	0.0831985
gene	ENSDARG00000062222	0.821727	2.04169	9.17378	0.00245506	2.65718	2.02088	0.0832101
gene	ENSDARG00000087324	-2.18376	-2.0267	9.17468	0.00245387	-3.21393	-1.52099	0.0832101
gene	ENSDARG00000035377	-5.21641	-3.21644	9.17473	0.00245379	-4.20394	-2.34964	0.0832101
gene	ENSDARG00000037142	-4.82474	-2.6029	9.15687	0.00247786	-4.20394	-2.58395	0.0838856
gene	ENSDARG00000092003	0.736205	1.1401	9.14743	0.00249068	1.90645	1.35975	0.084222
gene	ENSDARG00000086505	-1.01222	0.640544	9.13329	0.00251	0.389676	1.55972	0.084777
gene	ENSDARG00000092816	1.352	0.554984	9.1257	0.00252043	0.974784	-0.110582	0.0847928
gene	ENSDARG00000031359	-2.95454	-2.86002	9.12887	0.00251607	-3.6127	-1.5799	0.0847928
gene	ENSDARG00000005139	-4.83278	-2.73738	9.12627	0.00251965	-4.20394	-2.58741	0.0847928
gene	ENSDARG00000055523	-5.04219	-3.32607	9.12451	0.00252207	-4.20394	-2.46466	0.0847928
gene	ENSDARG00000101128	-4.82451	-3.17057	9.11956	0.00252891	-4.20394	-2.58395	0.0849248
gene	ENSDARG00000030254	-4.82996	-3.11789	9.11255	0.00253862	-4.20394	-2.58626	0.085153
gene	ENSDARG00000062467	4.90439	-3.26676	9.10183	0.00255354	-2.72461	-4.0452	0.0852442
gene	ENSDARG00000022020	0.749427	2.26501	9.10339	0.00255136	2.16214	1.61544	0.0852442
gene	ENSDARG00000097630	0.728365	3.16543	9.10012	0.00255593	3.17649	2.63528	0.0852442
gene	ENSDARG00000020465	0.531898	5.32977	9.10532	0.00254868	5.62369	5.28402	0.0852442
gene	ENSDARG00000060070	-1.03339	0.716766	9.10443	0.00254991	0.405071	1.57842	0.0852442
gene	ENSDARG00000099152	2.87312	-2.51393	9.09138	0.00256816	-2.1411	-3.58149	0.0853504
gene	ENSDARG00000090063	2.70221	-2.81136	9.08807	0.00257282	-2.01736	-3.46021	0.0853504
gene	ENSDARG00000094994	2.29141	-2.46982	9.08781	0.00257318	-1.79027	-3.16505	0.0853504
gene	ENSDARG00000091006	-0.962129	4.50439	9.08589	0.00257589	3.76334	4.89627	0.0853504
gene	ENSDARG00000089388	-2.43941	-0.993119	9.09189	0.00256745	-2.77053	-0.617041	0.0853504
gene	ENSDARG00000111837	-3.30965	-2.97971	9.08536	0.00257664	-3.88468	-2.05031	0.0853504
gene	ENSDARG00000068993	3.18879	-2.02254	9.06669	0.00260308	-2.28739	-3.72391	0.0859129
gene	ENSDARG00000061918	3.18877	-3.11818	9.06768	0.00260167	-2.28739	-3.72391	0.0859129
gene	ENSDARG00000110878	1.3408	1.60379	9.06301	0.00260832	1.6619	0.601232	0.0859129
gene	ENSDARG00000104267	-4.8214	-3.17217	9.06497	0.00260552	-4.20394	-2.5828	0.0859129
gene	ENSDARG00000017188	-5.37127	-3.32524	9.06814	0.00260101	-4.20394	-2.24316	0.0859129
gene	ENSDARG00000043241	-4.82707	-1.59845	9.05457	0.0026204	-4.20394	-2.58511	0.0862134
gene	ENSDARG00000099753	0.89511	1.13418	9.05111	0.00262535	1.40976	0.696889	0.0862791
gene	ENSDARG00000069135	0.76259	2.46923	9.04885	0.0026286	2.15078	1.569	0.086289
gene	ENSDARG00000116043	1.24621	0.0121196	9.04621	0.0026324	0.194753	-0.7731	0.0863166
gene	ENSDARG00000044290	-5.70489	-2.80891	9.04033	0.00264088	-4.20394	-1.99935	0.0864976
gene	ENSDARG00000011259	4.90994	-3.37731	9.03671	0.00264612	-2.72461	-4.0452	0.0865723
gene	ENSDARG00000058090	4.83597	-3.38528	9.0294	0.00265672	-2.74544	-4.0452	0.0865912
gene	ENSDARG00000090914	-0.714689	4.06671	9.03131	0.00265394	3.46982	4.34911	0.0865912
gene	ENSDARG00000038235	-0.875368	2.106	9.02814	0.00265855	1.02139	2.06629	0.0865912
gene	ENSDARG00000075151	-1.71954	1.32663	9.03283	0.00265174	0.842604	2.8205	0.0865912
gene	ENSDARG00000104431	-1.22578	1.39195	9.009	0.00268653	0.0152926	1.37932	0.0873076
gene	ENSDARG00000104329	-2.16477	-1.33152	9.00987	0.00268525	-3.19741	-1.52285	0.0873076
gene	ENSDARG00000014201	4.8886	-3.06771	9.00445	0.00269323	-2.72984	-4.0452	0.0874283
gene	ENSDARG00000092604	-4.95864	-3.46788	8.99833	0.00270227	-4.20394	-2.51834	0.0876243
gene	ENSDARG00000104502	0.896957	2.08371	8.99408	0.00270856	2.05864	1.37356	0.0877308
gene	ENSDARG00000105691	1.54905	-1.0011	8.98827	0.00271718	-0.899755	-2.04612	0.0878316
gene	ENSDARG00000003998	-0.749175	1.86401	8.98591	0.00272069	0.869957	1.77681	0.0878316
gene	ENSDARG00000056453	-3.16195	-2.90048	8.98642	0.00271994	-3.88468	-2.13765	0.0878316
gene	ENSDARG00000000423	0.862192	1.28544	8.98264	0.00272556	1.89152	1.21271	0.0878919
gene	ENSDARG00000105190	-0.736679	3.77891	8.9804	0.00272891	3.025	3.95532	0.0879028
gene	ENSDARG00000076182	-1.90312	0.367569	8.95567	0.0027661	-0.295846	1.83401	0.0890025
gene	ENSDARG00000039832	-1.61025	2.56701	8.95034	0.00277418	1.64674	3.43518	0.0890664
gene	ENSDARG00000056062	-4.83411	-3.11595	8.9522	0.00277135	-4.20394	-2.58741	0.0890664
gene	ENSDARG00000059558	1.70228	-1.52811	8.94462	0.00278288	-1.13305	-2.34077	0.0892476
gene	ENSDARG00000014215	1.15649	1.62247	8.92525	0.00281254	2.13963	1.18878	0.0900013
gene	ENSDARG00000054153	-2.19804	-2.43654	8.92648	0.00281065	-3.17537	-1.45643	0.0900013
gene	ENSDARG00000113626	1.92018	-1.94729	8.91675	0.00282567	-1.28275	-2.60972	0.0903226
gene	ENSDARG00000102513	5.36882	-3.37503	8.905	0.00284391	-2.47887	-4.0452	0.0906556
gene	ENSDARG00000036985	-0.678489	1.97557	8.90778	0.00283959	2.14353	2.98337	0.0906556
gene	ENSDARG00000104396	-0.966512	1.61908	8.90205	0.0028485	1.37458	2.53518	0.0906556
gene	ENSDARG00000103580	-4.84275	-3.21893	8.90268	0.00284753	-4.20394	-2.58971	0.0906556
gene	ENSDARG00000102558	-0.832169	3.12694	8.88774	0.00287092	2.42445	3.4586	0.0912698
gene	ENSDARG00000023174	0.843676	3.37586	8.87299	0.0028942	3.44645	2.76017	0.09181
gene	ENSDARG00000009021	-0.810522	2.59024	8.87465	0.00289158	2.63474	3.63078	0.09181
gene	ENSDARG00000099642	0.664452	2.31955	8.8598	0.00291519	2.49349	2.02483	0.0923756
gene	ENSDARG00000087573	-0.934201	1.13771	8.85284	0.00292633	0.826857	1.9144	0.0926279
gene	ENSDARG00000115108	-1.38153	-1.08772	8.85066	0.00292984	-1.82983	-0.448046	0.0926386
gene	ENSDARG00000038445	2.69731	-2.81409	8.8457	0.0029378	-2.02194	-3.46021	0.0927516
gene	ENSDARG00000035837	2.41079	-2.35829	8.84448	0.00293976	-1.81476	-3.23843	0.0927516
gene	ENSDARG00000075463	4.7959	-2.98889	8.83656	0.00295256	-2.76095	-4.0452	0.0929547
gene	ENSDARG00000077852	0.888468	1.7322	8.83852	0.00294938	2.00794	1.31225	0.0929547
gene	ENSDARG00000105118	1.19505	0.507426	8.83207	0.00295983	1.07855	0.122469	0.0930833
gene	ENSDARG00000105382	5.17514	-3.43488	8.8086	0.00299813	-2.59667	-4.0452	0.0938494
gene	ENSDARG00000055349	4.80681	-3.44714	8.80803	0.00299908	-2.75579	-4.0452	0.0938494
gene	ENSDARG00000101123	4.79483	-2.64796	8.80731	0.00300025	-2.7609	-4.0452	0.0938494
gene	ENSDARG00000088140	1.03134	3.06043	8.81292	0.00299105	3.31564	2.46578	0.0938494
gene	ENSDARG00000059054	-2.10949	-0.249335	8.81251	0.00299172	-2.74544	-0.918407	0.0938494
gene	ENSDARG00000036375	-0.822372	6.7264	8.80353	0.00300648	6.31771	7.31287	0.0939435
gene	ENSDARG00000008859	-0.655947	4.94842	8.79649	0.00301811	4.01174	4.85717	0.0941057
gene	ENSDARG00000070056	-1.90384	-1.76047	8.79767	0.00301616	-2.89112	-1.29229	0.0941057
gene	ENSDARG00000087330	-0.66905	1.93822	8.78167	0.00304273	1.26954	2.10025	0.0947722
gene	ENSDARG00000103933	1.8245	-1.95724	8.77696	0.00305059	-1.14735	-2.46014	0.0949159
gene	ENSDARG00000109327	-2.63992	-2.48357	8.76726	0.00306685	-3.6127	-1.8731	0.0953204
gene	ENSDARG00000094738	1.76018	-1.15124	8.75285	0.00309118	-1.08201	-2.34299	0.0959744
gene	ENSDARG00000001303	-1.73529	-1.96955	8.74973	0.00309647	-2.29703	-0.645439	0.0960366
gene	ENSDARG00000053450	4.90334	-3.26662	8.74278	0.00310831	-2.72984	-4.0452	0.0963016
gene	ENSDARG00000028618	1.63586	0.436722	8.73848	0.00311564	1.26781	-0.161331	0.0964264
gene	ENSDARG00000045064	-0.510259	6.05152	8.73643	0.00311914	5.82821	6.52187	0.0964326
gene	ENSDARG00000015033	5.37337	-3.37503	8.71271	0.00315999	-2.47887	-4.0452	0.097079
gene	ENSDARG00000017229	5.37323	-3.37503	8.71855	0.00314989	-2.47887	-4.0452	0.097079
gene	ENSDARG00000097505	1.9545	-2.25027	8.71305	0.0031594	-1.12333	-2.47688	0.097079
gene	ENSDARG00000009702	-1.20368	-0.278046	8.7145	0.00315688	-0.500051	0.844932	0.097079
gene	ENSDARG00000107077	-2.65529	-2.12231	8.71673	0.00315303	-3.61845	-1.87614	0.097079
gene	ENSDARG00000076434	-4.82658	-3.50482	8.71586	0.00315454	-4.20394	-2.58511	0.097079
gene	ENSDARG00000097477	-2.86432	-0.437044	8.70533	0.00317281	-2.20607	0.513299	0.0973705
gene	ENSDARG00000086612	3.14965	-2.99736	8.68489	0.00320858	-2.31144	-3.7226	0.0982815
gene	ENSDARG00000006283	0.725194	3.26315	8.68262	0.00321258	3.29579	2.73287	0.0982815
gene	ENSDARG00000029291	-0.63108	2.57465	8.68288	0.00321213	1.83982	2.63574	0.0982815
gene	ENSDARG00000057353	-1.15298	-0.437512	8.67892	0.00321911	-0.889811	0.369982	0.0983783
gene	ENSDARG00000038918	-1.55412	-1.21168	8.67225	0.00323093	-2.22491	-0.762132	0.0986362
gene	ENSDARG00000040553	0.924815	1.30485	8.66996	0.00323499	1.4013	0.682337	0.0986571
gene	ENSDARG00000088515	-2.48722	0.722072	8.66582	0.00324234	-2.49394	-0.124474	0.098778
gene	ENSDARG00000025218	-0.480255	4.37953	8.66064	0.00325157	4.36561	5.02453	0.0989562
gene	ENSDARG00000076443	-0.881296	1.33923	8.65549	0.00326078	0.790876	1.82562	0.099133
gene	ENSDARG00000063663	-0.659495	2.24023	8.64496	0.00327968	1.8927	2.7239	0.0995005
gene	ENSDARG00000044091	-3.15341	-3.03184	8.64635	0.00327718	-3.88468	-2.13338	0.0995005
gene	ENSDARG00000105589	-1.66793	-2.22574	8.63351	0.00330035	-2.51391	-1.00097	0.100024
gene	ENSDARG00000105263	4.78768	-3.0803	8.62999	0.00330674	-2.76095	-4.0452	0.10004
gene	ENSDARG00000100334	-4.81719	-3.50588	8.62945	0.00330771	-4.20394	-2.5828	0.10004
gene	ENSDARG00000107441	1.67158	-1.73011	8.61873	0.00332724	-0.623552	-1.87816	0.100526
gene	ENSDARG00000098612	2.34808	-2.11342	8.60677	0.00334917	-1.86994	-3.23968	0.101084
gene	ENSDARG00000089021	3.2125	-2.97822	8.59892	0.00336363	-2.28256	-3.72391	0.101416
gene	ENSDARG00000035601	3.08103	-2.88875	8.5811	0.0033967	-1.78429	-3.45893	0.101972
gene	ENSDARG00000032318	1.23161	1.16684	8.58652	0.0033866	1.9267	0.878353	0.101972
gene	ENSDARG00000031317	-0.595007	7.60754	8.58001	0.00339873	7.19827	7.98176	0.101972
gene	ENSDARG00000030153	-0.667583	2.34865	8.57655	0.0034052	1.86423	2.69782	0.101972
gene	ENSDARG00000100897	-0.676899	3.6235	8.57903	0.00340056	3.06181	3.90369	0.101972
gene	ENSDARG00000112052	-1.68391	-1.37202	8.57586	0.0034065	-1.97382	-0.368159	0.101972
gene	ENSDARG00000015003	-3.05167	3.28424	8.57996	0.00339883	0.709378	4.02051	0.101972
gene	ENSDARG00000037334	0.698981	2.2837	8.56959	0.00341824	2.45565	1.95116	0.102218
gene	ENSDARG00000103848	1.11785	-0.011792	8.56148	0.0034335	0.366706	-0.485924	0.10257
gene	ENSDARG00000114711	1.09259	0.927449	8.53692	0.00348014	1.00368	0.148087	0.103751
gene	ENSDARG00000045661	-2.3307	-2.22107	8.538	0.00347808	-3.40424	-1.72604	0.103751
gene	ENSDARG00000105137	2.25716	-1.4852	8.53368	0.00348635	-1.80832	-3.15162	0.10383
gene	ENSDARG00000098989	2.34378	0.110782	8.51838	0.00351578	-0.406845	-2.25646	0.1046
gene	ENSDARG00000058218	-4.84312	-3.50322	8.49059	0.00356988	-4.20394	-2.58856	0.106101
gene	ENSDARG00000098783	0.533016	5.6817	8.47511	0.00360038	5.88153	5.51808	0.106899
gene	ENSDARG00000101110	-1.81627	-1.67733	8.47172	0.0036071	-2.76095	-1.18572	0.10699
gene	ENSDARG00000097082	0.939211	0.0362493	8.46505	0.00362036	0.825301	0.108879	0.107274
gene	ENSDARG00000017474	4.82343	-3.13797	8.4458	0.00365887	-2.77643	-4.0452	0.108131
gene	ENSDARG00000023479	4.78065	-3.39023	8.44861	0.00365322	-2.76095	-4.0452	0.108131
gene	ENSDARG00000073688	-0.861774	1.68148	8.44321	0.00366409	1.11107	2.12676	0.108131
gene	ENSDARG00000091445	-4.71805	-2.83501	8.44342	0.00366367	-4.20394	-2.64764	0.108131
gene	ENSDARG00000009733	-1.02059	0.292596	8.43793	0.00367475	-0.544202	0.582667	0.108337
gene	ENSDARG00000110967	-0.916492	2.7008	8.42813	0.00369461	1.69137	2.80104	0.108812
gene	ENSDARG00000095981	1.95558	-2.18185	8.42445	0.00370208	-1.42155	-2.71588	0.108922
gene	ENSDARG00000017910	-1.13959	-0.17856	8.41894	0.00371332	-1.16743	0.0399008	0.109143
gene	ENSDARG00000076330	0.841581	1.11812	8.41377	0.00372391	1.31941	0.684751	0.109344
gene	ENSDARG00000100506	0.959517	0.156928	8.41132	0.00372893	0.822186	0.0903157	0.109382
gene	ENSDARG00000031751	4.95385	-3.49723	8.40689	0.00373802	-2.72461	-4.0452	0.109429
gene	ENSDARG00000070597	1.45649	-0.366785	8.40848	0.00373476	-0.624968	-1.72017	0.109429
gene	ENSDARG00000074863	-1.25633	1.13486	8.4028	0.00374643	0.104149	1.49054	0.109557
gene	ENSDARG00000100968	-1.40526	0.838688	8.40112	0.00374989	0.347498	1.89966	0.109557
gene	ENSDARG00000102363	-1.45848	-0.696413	8.39738	0.00375762	-2.12994	-0.721531	0.109673
gene	ENSDARG00000007184	-1.5198	1.62382	8.39314	0.0037664	0.590931	2.27866	0.109804
gene	ENSDARG00000078399	-2.64011	-2.49968	8.39159	0.00376961	-3.6127	-1.87513	0.109804
gene	ENSDARG00000075285	-1.32564	-1.12804	8.38874	0.00377553	-1.76232	-0.430514	0.109866
gene	ENSDARG00000044327	-0.729941	2.48805	8.36582	0.00382345	1.89318	2.7772	0.11115
gene	ENSDARG00000096081	3.12536	-3.18063	8.35499	0.00384629	-2.321	-3.7226	0.111703
gene	ENSDARG00000100375	1.13962	0.0722677	8.34726	0.00386269	0.590811	-0.343806	0.112068
gene	ENSDARG00000031598	0.857744	4.75245	8.34526	0.00386695	5.21991	4.54851	0.11208
gene	ENSDARG00000011141	0.730006	2.1284	8.32945	0.00390076	2.49775	1.97	0.112948
gene	ENSDARG00000008127	1.60509	-1.86938	8.32339	0.00391377	-0.858853	-2.04087	0.113213
gene	ENSDARG00000075455	1.20177	0.234659	8.31398	0.00393412	0.259315	-0.688459	0.113689
gene	ENSDARG00000103851	-0.790682	2.85762	8.31122	0.00394009	2.0694	3.01247	0.113749
gene	ENSDARG00000092553	-0.434519	9.54347	8.30402	0.00395575	9.10096	9.71441	0.113976
gene	ENSDARG00000054332	-1.25414	0.979294	8.30508	0.00395343	-0.698435	0.667642	0.113976
gene	ENSDARG00000099946	0.974695	1.65224	8.28116	0.00400584	2.09999	1.29338	0.115305
gene	ENSDARG00000090185	4.96141	-3.32091	8.27265	0.00402468	-2.72461	-4.0452	0.115733
gene	ENSDARG00000016363	1.43516	-0.984922	8.25936	0.00405425	-0.468018	-1.58749	0.116469
gene	ENSDARG00000079781	1.5856	0.610036	8.24106	0.00409532	1.38366	0.0355461	0.117168
gene	ENSDARG00000008811	0.746759	2.73523	8.23959	0.00409863	2.96665	2.40925	0.117168
gene	ENSDARG00000036164	0.664448	4.30628	8.24388	0.00408897	4.70963	4.24952	0.117168
gene	ENSDARG00000045567	-0.743661	4.16754	8.24004	0.00409762	3.76852	4.70942	0.117168
gene	ENSDARG00000040926	-1.26043	-0.959604	8.24161	0.00409409	-1.41566	-0.114412	0.117168
gene	ENSDARG00000057687	2.22219	-1.88736	8.23412	0.00411101	-1.22083	-2.72554	0.117407
gene	ENSDARG00000060512	-0.965283	0.651533	8.22999	0.00412037	0.355463	1.44877	0.117559
gene	ENSDARG00000095890	0.578444	2.97028	8.20977	0.00416654	2.96809	2.57664	0.118733
gene	ENSDARG00000029114	-1.98355	-0.99968	8.20842	0.00416965	-2.40902	-0.621835	0.118733
gene	ENSDARG00000074308	-1.52504	-1.92513	8.2009	0.00418696	-2.30664	-0.875792	0.11911
gene	ENSDARG00000054609	2.57905	-2.66478	8.19025	0.00421161	-2.10673	-3.46148	0.119347
gene	ENSDARG00000076830	2.30245	-2.75275	8.19209	0.00420735	-1.90081	-3.23593	0.119347
gene	ENSDARG00000020581	2.29189	-2.07051	8.19393	0.00420309	-1.90081	-3.23762	0.119347
gene	ENSDARG00000052658	-1.2258	-0.15553	8.1918	0.00420802	-0.951754	0.328078	0.119347
gene	ENSDARG00000078185	-0.860847	1.22063	8.17776	0.0042407	0.159709	1.15603	0.120055
gene	ENSDARG00000103992	-1.73061	-2.1577	8.17032	0.00425813	-2.70175	-1.18641	0.120431
gene	ENSDARG00000037539	2.6265	-2.9495	8.15891	0.004285	-2.05386	-3.46021	0.120505
gene	ENSDARG00000002760	1.41718	-1.20256	8.15871	0.00428549	-0.729643	-1.79861	0.120505
gene	ENSDARG00000059150	1.16055	1.07656	8.15969	0.00428318	1.72021	0.798781	0.120505
gene	ENSDARG00000011545	-0.615055	3.00195	8.16287	0.00427566	2.60045	3.38927	0.120505
gene	ENSDARG00000070721	-0.621144	3.40904	8.15921	0.0042843	3.09589	3.886	0.120505
gene	ENSDARG00000096816	-4.75329	-3.46885	8.15945	0.00428374	-4.20394	-2.64975	0.120505
gene	ENSDARG00000054031	-0.609108	3.49552	8.15013	0.0043058	3.0401	3.80877	0.120844
gene	ENSDARG00000013855	-1.55114	-1.63418	8.15094	0.00430389	-2.39434	-0.958285	0.120844
gene	ENSDARG00000036968	-1.40102	0.413802	8.14152	0.00432631	-0.61291	0.896133	0.121186
gene	ENSDARG00000045554	-1.4909	-0.909727	8.14307	0.00432261	-1.15654	0.441162	0.121186
gene	ENSDARG00000003520	0.699363	3.626	8.13904	0.00433223	3.89735	3.37001	0.121236
gene	ENSDARG00000104266	1.35729	-0.253412	8.13669	0.00433785	-0.668783	-1.67524	0.121277
gene	ENSDARG00000090338	-0.650486	3.82559	8.11331	0.00439415	3.43287	4.25677	0.122734
gene	ENSDARG00000042993	1.84518	-2.04891	8.10829	0.00440632	-1.49946	-2.72554	0.122956
gene	ENSDARG00000044039	4.76768	-3.51127	8.10195	0.00442176	-2.76095	-4.0452	0.123269
gene	ENSDARG00000069957	-1.02156	-0.35421	8.09973	0.00442719	-0.862127	0.259701	0.123303
gene	ENSDARG00000093549	0.598841	4.12691	8.0971	0.00443361	3.8956	3.48983	0.123364
gene	ENSDARG00000043858	-1.20304	0.000128922	8.09006	0.00445088	-0.955108	0.314663	0.123727
gene	ENSDARG00000115941	4.63296	-3.5024	8.08451	0.00446453	-2.87526	-4.0452	0.12387
gene	ENSDARG00000058459	0.638369	2.30407	8.085	0.00446331	2.46134	2.0001	0.12387
gene	ENSDARG00000078561	-0.60841	3.47232	8.08216	0.0044703	2.8553	3.62322	0.123913
gene	ENSDARG00000028676	1.28465	0.31561	8.0775	0.00448183	0.120571	-0.91919	0.124092
gene	ENSDARG00000017034	-0.693803	1.62268	8.07611	0.00448525	1.12609	1.97905	0.124092
gene	ENSDARG00000028276	4.65949	-3.56233	8.07381	0.00449096	-2.86463	-4.0452	0.124132
gene	ENSDARG00000023724	0.835555	1.3946	8.06235	0.00451945	1.45982	0.824289	0.124802
gene	ENSDARG00000032435	-1.19323	1.42928	8.05386	0.00454067	0.736061	2.08939	0.125269
gene	ENSDARG00000079742	-1.00555	0.541937	8.04784	0.00455579	-0.669279	0.450214	0.125568
gene	ENSDARG00000020079	2.06267	-2.19128	8.04316	0.00456758	-1.54596	-2.87581	0.125774
gene	ENSDARG00000107534	-2.55211	-2.47464	8.03904	0.00457798	-3.62419	-1.95502	0.125942
gene	ENSDARG00000023600	-0.852703	3.42084	8.02809	0.00460575	2.78117	3.78152	0.126349
gene	ENSDARG00000019856	-1.41959	2.93012	8.02916	0.00460302	1.75617	3.2984	0.126349
gene	ENSDARG00000094046	-4.63573	-3.01653	8.02844	0.00460485	-4.20394	-2.71301	0.126349
gene	ENSDARG00000068589	4.76485	-3.51127	8.02403	0.00461606	-2.76095	-4.0452	0.126365
gene	ENSDARG00000104730	4.6356	-3.27073	8.02495	0.00461372	-2.87526	-4.0452	0.126365
gene	ENSDARG00000090699	3.05178	-3.07048	8.02277	0.0046193	-2.38943	-3.7226	0.126365
gene	ENSDARG00000039863	4.66715	-3.49787	8.01162	0.00464782	-2.86463	-4.0452	0.127026
gene	ENSDARG00000099736	4.8007	-2.8046	8.00309	0.00466976	-2.80986	-4.0452	0.127157
gene	ENSDARG00000043141	3.05861	-3.16564	8.00793	0.0046573	-2.38452	-3.72391	0.127157
gene	ENSDARG00000086481	-1.05349	0.00948012	8.00432	0.00466659	-0.773571	0.37866	0.127157
gene	ENSDARG00000005185	-5.37645	-2.73993	8.00298	0.00467004	-4.20394	-2.24316	0.127157
gene	ENSDARG00000052688	-4.61442	-2.38169	7.99735	0.00468458	-4.20394	-2.7232	0.127434
gene	ENSDARG00000086840	3.07331	-3.06664	7.99523	0.00469007	-2.37959	-3.7226	0.127465
gene	ENSDARG00000075248	3.25726	-3.21396	7.98661	0.00471245	-2.27773	-3.7226	0.127724
gene	ENSDARG00000069765	3.07379	-2.89357	7.98651	0.00471271	-2.37959	-3.7226	0.127724
gene	ENSDARG00000003865	-1.31413	-0.866395	7.98853	0.00470747	-1.69562	-0.374722	0.127724
gene	ENSDARG00000030782	4.62575	-2.77477	7.98067	0.00472793	-2.88056	-4.0452	0.127899
gene	ENSDARG00000111102	-4.61667	-2.81566	7.98091	0.00472733	-4.20394	-2.72437	0.127899
gene	ENSDARG00000113474	4.65239	-3.49988	7.97835	0.00473401	-2.86995	-4.0452	0.127945
gene	ENSDARG00000069518	4.6161	-3.57039	7.97341	0.00474695	-2.88585	-4.0452	0.128004
gene	ENSDARG00000054690	4.60801	-3.22432	7.97249	0.00474935	-2.89112	-4.0452	0.128004
gene	ENSDARG00000009123	-2.5426	-2.85593	7.97371	0.00474615	-3.6127	-1.95914	0.128004
gene	ENSDARG00000105653	4.62595	-2.77924	7.96578	0.00476699	-2.88056	-4.0452	0.128362
gene	ENSDARG00000101918	4.67311	-3.43728	7.96086	0.00477996	-2.86463	-4.0452	0.128474
gene	ENSDARG00000078002	-0.719189	2.51562	7.96121	0.00477905	2.06686	2.95525	0.128474
gene	ENSDARG00000094286	-1.60125	-2.30291	7.95831	0.0047867	-2.50394	-1.04415	0.128537
gene	ENSDARG00000096184	4.63647	-2.66195	7.95376	0.00479874	-2.86545	-4.0452	0.128622
gene	ENSDARG00000098386	0.855141	3.67663	7.95095	0.00480622	4.09908	3.43541	0.128622
gene	ENSDARG00000041869	0.845774	2.06995	7.94717	0.00481627	2.2123	1.54303	0.128622
gene	ENSDARG00000056683	-0.742307	2.20709	7.94823	0.00481344	1.62331	2.54799	0.128622
gene	ENSDARG00000104850	-1.125	-0.0744185	7.95101	0.00480606	-0.254045	0.977705	0.128622
gene	ENSDARG00000008880	-1.79375	-1.08777	7.9504	0.00480767	-2.74025	-1.19168	0.128622
gene	ENSDARG00000069196	4.65501	-3.11826	7.94384	0.00482513	-2.86995	-4.0452	0.128623
gene	ENSDARG00000098557	1.15563	1.28019	7.9441	0.00482444	2.01	1.01378	0.128623
gene	ENSDARG00000079839	-1.39083	-0.697291	7.94148	0.00483144	-1.40789	0.0231658	0.128674
gene	ENSDARG00000094045	4.65693	-2.07756	7.91821	0.00489398	-2.86995	-4.0452	0.129046
gene	ENSDARG00000099448	4.6396	-3.56636	7.93134	0.00485859	-2.87526	-4.0452	0.129046
gene	ENSDARG00000039647	4.59856	-3.22507	7.91841	0.00489342	-2.89639	-4.0452	0.129046
gene	ENSDARG00000045753	1.49369	-1.31982	7.92961	0.00486323	-0.593526	-1.72017	0.129046
gene	ENSDARG00000104401	-0.496843	3.83349	7.92281	0.00488155	3.50965	4.18227	0.129046
gene	ENSDARG00000075158	-0.754354	1.61974	7.92273	0.00488176	0.983629	1.88522	0.129046
gene	ENSDARG00000053340	-1.23298	0.151154	7.93182	0.00485728	-0.981733	0.327887	0.129046
gene	ENSDARG00000099129	-1.8676	0.565531	7.92211	0.00488342	-1.52141	0.445697	0.129046
gene	ENSDARG00000116259	-4.60961	-3.11398	7.91984	0.00488957	-4.20394	-2.72085	0.129046
gene	ENSDARG00000078398	-4.61198	-2.85651	7.91862	0.00489286	-4.20394	-2.72202	0.129046
gene	ENSDARG00000063019	-4.6171	-1.98206	7.92483	0.00487609	-4.20394	-2.72437	0.129046
gene	ENSDARG00000075917	2.62804	-2.0173	7.91134	0.00491259	-0.702873	-2.7232	0.129303
gene	ENSDARG00000057272	0.47118	5.02631	7.91203	0.00491071	5.15989	4.86875	0.129303
gene	ENSDARG00000055493	3.05151	-2.85755	7.90898	0.00491901	-2.38943	-3.72391	0.129355
gene	ENSDARG00000103342	3.06564	-3.16672	7.90345	0.00493407	-2.38452	-3.7226	0.129457
gene	ENSDARG00000032326	0.579863	2.88638	7.90105	0.00494061	2.50801	2.11645	0.129457
gene	ENSDARG00000040087	-0.467674	6.26702	7.9022	0.00493747	5.80786	6.45558	0.129457
gene	ENSDARG00000054641	-3.02874	-3.07403	7.90356	0.00493376	-3.88468	-2.23773	0.129457
gene	ENSDARG00000099915	4.62684	-3.27216	7.89885	0.00494662	-2.88056	-4.0452	0.129499
gene	ENSDARG00000103409	1.16823	-0.0385515	7.89164	0.00496639	0.110832	-0.80002	0.129668
gene	ENSDARG00000090889	-1.34562	-1.35794	7.89396	0.00496003	-1.81476	-0.455931	0.129668
gene	ENSDARG00000002494	-3.02683	-3.1212	7.89231	0.00496455	-3.88468	-2.23664	0.129668
gene	ENSDARG00000090890	4.68119	-3.56233	7.88846	0.00497513	-2.86463	-4.0452	0.129701
gene	ENSDARG00000098076	-1.59971	-2.07411	7.88794	0.00497654	-2.50394	-1.04333	0.129701
gene	ENSDARG00000002968	-4.6118	-3.2733	7.88583	0.00498237	-4.20394	-2.72202	0.129737
gene	ENSDARG00000051879	-4.61453	-3.3248	7.8842	0.00498685	-4.20394	-2.7232	0.129738
gene	ENSDARG00000092501	4.64169	-3.50246	7.88082	0.00499617	-2.87526	-4.0452	0.129841
gene	ENSDARG00000045316	3.02235	-2.6401	7.87955	0.00499969	-2.40902	-3.7226	0.129841
gene	ENSDARG00000063040	-1.18742	-0.00508779	7.87684	0.00500719	-1.51951	-0.291241	0.129842
gene	ENSDARG00000038868	-4.61175	-3.17038	7.87632	0.00500863	-4.20394	-2.72202	0.129842
gene	ENSDARG00000056743	1.20042	0.884503	7.87084	0.00502384	0.853171	-0.0997575	0.12998
gene	ENSDARG00000010756	1.02647	1.0946	7.87128	0.0050226	1.5874	0.76181	0.12998
gene	ENSDARG00000071217	-4.61454	-3.56862	7.8696	0.00502729	-4.20394	-2.7232	0.12998
gene	ENSDARG00000099715	4.59603	-3.44914	7.86725	0.00503382	-2.89639	-4.0452	0.130034
gene	ENSDARG00000073970	2.24765	-2.09457	7.86102	0.0050512	-1.95069	-3.23718	0.130367
gene	ENSDARG00000067751	1.71192	-1.81836	7.85929	0.00505601	-1.17607	-2.36324	0.130376
gene	ENSDARG00000097485	2.45286	-0.51233	7.85665	0.0050634	0.821172	-1.34307	0.130452
gene	ENSDARG00000069382	-4.61162	-3.56915	7.85133	0.00507833	-4.20394	-2.72202	0.130721
gene	ENSDARG00000063006	4.62756	-3.44316	7.84333	0.00510086	-2.88056	-4.0452	0.130784
gene	ENSDARG00000056156	1.67152	0.295192	7.84252	0.00510314	-0.649799	-1.8731	0.130784
gene	ENSDARG00000030753	1.48572	-0.924071	7.8444	0.00509785	-0.329299	-1.49019	0.130784
gene	ENSDARG00000094491	-1.0478	2.01976	7.84412	0.00509861	1.14232	2.35503	0.130784
gene	ENSDARG00000102050	-4.61768	-2.81565	7.84753	0.00508903	-4.20394	-2.72437	0.130784
gene	ENSDARG00000089602	-4.6087	-3.2228	7.84061	0.00510853	-4.20394	-2.72085	0.130807
gene	ENSDARG00000060751	-3.02418	-2.70373	7.83881	0.00511362	-3.8788	-2.23991	0.130823
gene	ENSDARG00000001999	-0.954507	1.99338	7.83355	0.00512851	1.44	2.53105	0.13095
gene	ENSDARG00000087188	-1.12867	0.778313	7.83421	0.00512666	0.0507238	1.31165	0.13095
gene	ENSDARG00000104407	-1.6815	-0.464868	7.83231	0.00513204	-0.965923	0.690658	0.13095
gene	ENSDARG00000106158	4.66402	-3.49951	7.81966	0.0051681	-2.86995	-4.0452	0.131755
gene	ENSDARG00000069984	-4.60559	-3.23663	7.81769	0.00517373	-4.20394	-2.71967	0.131783
gene	ENSDARG00000036755	0.708587	1.76874	7.81509	0.00518117	1.8999	1.38657	0.131802
gene	ENSDARG00000068098	-3.034	-2.70754	7.81429	0.00518349	-3.88468	-2.23991	0.131802
gene	ENSDARG00000114874	-4.6114	-3.3847	7.81112	0.00519256	-4.20394	-2.72202	0.131918
gene	ENSDARG00000061764	-0.498505	9.20939	7.80649	0.00520588	8.84594	9.5301	0.132142
gene	ENSDARG00000099626	2.5921	-2.89149	7.80177	0.00521952	-1.83825	-3.30795	0.132255
gene	ENSDARG00000101388	-0.921084	0.128288	7.80024	0.00522392	0.0526577	1.10029	0.132255
gene	ENSDARG00000057239	-3.02203	-2.70621	7.80027	0.00522385	-3.8788	-2.23882	0.132255
gene	ENSDARG00000029230	4.66599	-3.56434	7.79125	0.00525	-2.86995	-4.0452	0.132657
gene	ENSDARG00000021869	-1.11303	-0.0124428	7.78874	0.00525728	-1.17106	0.0237145	0.132657
gene	ENSDARG00000114999	-2.2327	-2.11756	7.79213	0.00524744	-3.40424	-1.79761	0.132657
gene	ENSDARG00000059123	-4.60509	-2.94307	7.78851	0.00525795	-4.20394	-2.71967	0.132657
gene	ENSDARG00000105730	4.64551	-3.56636	7.78504	0.00526807	-2.87526	-4.0452	0.132683
gene	ENSDARG00000115511	-0.996035	0.713899	7.78528	0.00526736	-0.0845292	1.06773	0.132683
gene	ENSDARG00000038006	4.61401	-3.50647	7.78178	0.00527757	-2.88585	-4.0452	0.132729
gene	ENSDARG00000099359	1.71244	0.382328	7.7813	0.00527899	0.335871	-0.987374	0.132729
gene	ENSDARG00000004111	3.01812	-1.80142	7.7726	0.00530446	-2.40902	-3.72391	0.133255
gene	ENSDARG00000077577	1.63939	-1.22737	7.76788	0.00531835	-0.53545	-1.79761	0.133465
gene	ENSDARG00000062206	-0.860166	4.76215	7.76664	0.00532199	4.26607	5.3073	0.133465
gene	ENSDARG00000104037	-1.97371	-2.35459	7.75974	0.00534237	-2.74544	-1.05067	0.133565
gene	ENSDARG00000028784	-4.37089	-2.11537	7.76372	0.0053306	-3.62419	-0.53569	0.133565
gene	ENSDARG00000076262	-4.6046	-3.12092	7.75911	0.00534424	-4.20394	-2.71967	0.133565
gene	ENSDARG00000114158	-4.61831	-3.41733	7.75917	0.00534405	-4.20394	-2.72437	0.133565
gene	ENSDARG00000114783	-1.63436	-2.14685	7.7546	0.00535759	-2.5652	-1.10219	0.133784
gene	ENSDARG00000039729	-0.575146	2.83434	7.74639	0.00538201	2.54053	3.29021	0.134279
gene	ENSDARG00000057586	1.64545	-1.78276	7.74079	0.00539871	-1.3039	-2.43769	0.134581
gene	ENSDARG00000023058	-0.707663	2.80644	7.73321	0.00542143	2.25347	3.10885	0.135032
gene	ENSDARG00000096959	-1.13835	-0.526363	7.73109	0.0054278	-1.04635	0.190371	0.135075
gene	ENSDARG00000089874	3.68277	-3.08859	7.72038	0.0054601	-2.64146	-3.9145	0.135764
gene	ENSDARG00000035161	-0.749052	2.19259	7.71361	0.00548062	1.24449	2.15904	0.136158
gene	ENSDARG00000113294	4.6121	-3.36336	7.70845	0.00549629	-2.89663	-4.0452	0.1362
gene	ENSDARG00000023036	2.12142	2.74077	7.70876	0.00549536	2.57347	0.78069	0.1362
gene	ENSDARG00000057881	1.70197	-1.49249	7.71012	0.00549121	-0.513909	-1.87715	0.1362
gene	ENSDARG00000061622	4.64872	-3.56636	7.70112	0.00551867	-2.87526	-4.0452	0.136636
gene	ENSDARG00000069011	3.05547	-3.27081	7.69962	0.00552324	-2.38943	-3.72391	0.136636
gene	ENSDARG00000062748	-3.15075	-1.04159	7.68881	0.00555644	-3.88468	-2.13338	0.137341
gene	ENSDARG00000069555	-2.87384	-2.66153	7.68117	0.00558	-3.80139	-2.13966	0.137807
gene	ENSDARG00000116122	-1.3961	-0.0193753	7.67794	0.00558999	-1.37034	0.0415329	0.13782
gene	ENSDARG00000032885	-4.60329	-2.89766	7.67944	0.00558535	-4.20394	-2.71967	0.13782
gene	ENSDARG00000046007	4.62967	-3.56837	7.67477	0.00559983	-2.88056	-4.0452	0.137859
gene	ENSDARG00000043740	1.10832	-0.665138	7.67287	0.00560571	-0.149318	-1.00177	0.137859
gene	ENSDARG00000044622	-2.22746	-2.41241	7.67326	0.00560451	-3.39863	-1.79861	0.137859
gene	ENSDARG00000074451	1.39058	-1.37858	7.66243	0.00563824	-0.770376	-1.79761	0.138315
gene	ENSDARG00000104120	-1.88823	-1.2009	7.66237	0.00563844	-2.40414	-0.690635	0.138315
gene	ENSDARG00000016022	-4.61064	-3.32901	7.66307	0.00563626	-4.20394	-2.72202	0.138315
gene	ENSDARG00000056087	4.70387	-3.49844	7.66038	0.00564467	-2.86463	-4.0452	0.138351
gene	ENSDARG00000116666	1.54604	-1.77505	7.65568	0.00565938	-1.14928	-2.23555	0.138564
gene	ENSDARG00000097726	1.33629	-1.40958	7.65249	0.00566939	-0.571571	-1.58559	0.138564
gene	ENSDARG00000037706	-0.591264	4.37965	7.64855	0.00568181	3.83518	4.61364	0.138564
gene	ENSDARG00000086052	-1.05178	0.24363	7.64895	0.00568054	-0.818937	0.329033	0.138564
gene	ENSDARG00000003994	-3.05714	-2.41729	7.65101	0.00567405	-3.6127	-1.45086	0.138564
gene	ENSDARG00000056643	-4.62838	-3.56702	7.6514	0.00567284	-4.20394	-2.72672	0.138564
gene	ENSDARG00000092259	1.62091	-2.13867	7.64593	0.00569004	-1.09722	-2.23555	0.138649
gene	ENSDARG00000104125	0.940554	0.515368	7.64097	0.00570573	0.559434	-0.161925	0.138916
gene	ENSDARG00000075217	4.6762	-3.56434	7.63577	0.00572221	-2.86995	-4.0452	0.139085
gene	ENSDARG00000110874	-4.62381	-3.27291	7.63661	0.00571954	-4.20394	-2.72554	0.139085
gene	ENSDARG00000091783	-4.61474	-3.56862	7.63138	0.00573613	-4.20394	-2.7232	0.139307
gene	ENSDARG00000069893	0.536877	3.38513	7.62707	0.00574986	3.59745	3.23394	0.139525
gene	ENSDARG00000007098	-0.46515	8.85059	7.61762	0.00578007	8.60759	9.25219	0.139909
gene	ENSDARG00000028053	-0.542817	8.56988	7.61826	0.00577803	7.98304	8.695	0.139909
gene	ENSDARG00000056652	-4.62402	-3.32743	7.6198	0.00577308	-4.20394	-2.72554	0.139909
gene	ENSDARG00000007856	2.04431	-1.47487	7.6124	0.00579683	-1.28427	-2.72202	0.139967
gene	ENSDARG00000010701	0.768389	14.1122	7.61298	0.00579496	14.404	13.8145	0.139967
gene	ENSDARG00000101567	-2.56009	-1.86919	7.61505	0.0057883	-3.61845	-1.96223	0.139967
gene	ENSDARG00000037995	1.33632	1.42526	7.6076	0.00581229	2.11092	1.02391	0.140224
gene	ENSDARG00000090503	-0.963677	0.0878815	7.60358	0.00582525	-0.611426	0.459299	0.140421
gene	ENSDARG00000002771	1.55235	-1.27488	7.60159	0.0058317	-0.71478	-1.85127	0.140436
gene	ENSDARG00000054864	-0.741058	7.82075	7.60042	0.00583548	7.32709	8.25424	0.140436
gene	ENSDARG00000055132	4.70943	-3.43542	7.59807	0.00584307	-2.86463	-4.0452	0.140503
gene	ENSDARG00000093135	4.61205	-3.57039	7.59169	0.00586381	-2.88585	-4.0452	0.140886
gene	ENSDARG00000010266	-1.21219	-1.00937	7.58575	0.00588316	-1.27359	0.0215193	0.141234
gene	ENSDARG00000101760	1.25284	-0.101982	7.58198	0.00589548	0.471198	-0.503987	0.141414
gene	ENSDARG00000010255	-0.780763	1.25265	7.57998	0.005902	0.559434	1.48366	0.141454
gene	ENSDARG00000040881	0.686243	2.72985	7.57819	0.00590787	2.85229	2.36627	0.141479
gene	ENSDARG00000071450	4.65344	-3.16896	7.57169	0.00592921	-2.87526	-4.0452	0.141833
gene	ENSDARG00000058154	-0.944544	0.571126	7.57073	0.00593238	-0.146832	0.917999	0.141833
gene	ENSDARG00000096109	4.61432	-3.5729	7.56726	0.00594382	-2.89052	-4.0452	0.141875
gene	ENSDARG00000099276	-4.61963	-3.56809	7.56769	0.0059424	-4.20394	-2.72437	0.141875
gene	ENSDARG00000079957	-4.63002	-2.77279	7.56571	0.00594892	-4.20394	-2.72672	0.141881
gene	ENSDARG00000011222	1.37759	-1.29378	7.55511	0.005984	-0.511047	-1.58559	0.142445
gene	ENSDARG00000078755	-1.88205	-1.42552	7.55415	0.0059872	-2.75062	-1.14396	0.142445
gene	ENSDARG00000029474	-3.28817	-2.49624	7.55551	0.00598267	-3.8788	-2.05031	0.142445
gene	ENSDARG00000101185	-1.08269	0.549103	7.55265	0.0059922	-0.4063	0.795222	0.142448
gene	ENSDARG00000099307	-0.544834	4.08677	7.54618	0.00601376	3.3622	4.0887	0.142844
gene	ENSDARG00000105364	0.639772	2.98328	7.54403	0.00602093	3.16879	2.72238	0.142863
gene	ENSDARG00000104892	-3.06273	-3.16335	7.54301	0.00602434	-3.88468	-2.22966	0.142863
gene	ENSDARG00000030417	-0.732043	2.73485	7.53709	0.00604415	2.32641	3.23169	0.143216
gene	ENSDARG00000092522	-0.949096	0.420263	7.53064	0.00606585	0.0647531	1.15415	0.143614
gene	ENSDARG00000044776	-1.10449	-0.214292	7.5272	0.00607743	-0.279654	0.953808	0.143765
gene	ENSDARG00000039577	-4.62521	-2.98171	7.52583	0.00608205	-4.20394	-2.72554	0.143765
gene	ENSDARG00000001234	1.0201	0.604278	7.52187	0.00609543	0.336981	-0.46127	0.143848
gene	ENSDARG00000010729	-2.47819	-0.902583	7.52231	0.00609395	-1.81909	0.652272	0.143848
gene	ENSDARG00000029476	-0.974666	0.696901	7.51348	0.0061239	0.0439234	1.13755	0.144403
gene	ENSDARG00000036870	-0.518738	3.41081	7.5118	0.00612961	3.10089	3.79716	0.144421
gene	ENSDARG00000074708	2.98134	-2.96009	7.50812	0.00614214	-2.43889	-3.7226	0.1446
gene	ENSDARG00000044491	1.12893	0.0072397	7.50145	0.00616494	-0.283361	-1.13057	0.14502
gene	ENSDARG00000061541	-4.63125	-3.38327	7.49887	0.00617377	-4.20394	-2.72672	0.145111
gene	ENSDARG00000040190	0.510344	3.80968	7.49429	0.00618949	4.06369	3.73852	0.145363
gene	ENSDARG00000100199	-0.709827	2.17197	7.48252	0.0062301	1.68993	2.58088	0.1462
gene	ENSDARG00000070391	1.04305	2.30524	7.4792	0.00624158	3.11706	2.29319	0.146352
gene	ENSDARG00000063292	-1.12632	-0.471992	7.47503	0.00625606	-0.73431	0.484731	0.146541
gene	ENSDARG00000040162	-4.63171	-3.56702	7.47398	0.00625969	-4.20394	-2.72672	0.146541
gene	ENSDARG00000042737	2.30287	-2.33514	7.46015	0.00630797	-1.93033	-3.23718	0.147553
gene	ENSDARG00000062248	-0.68463	4.4883	7.44886	0.00634766	3.94179	4.82495	0.148332
gene	ENSDARG00000094704	-1.26573	0.00209238	7.4478	0.00635141	-1.04286	0.294791	0.148332
gene	ENSDARG00000034916	0.561574	3.97935	7.44454	0.00636291	3.91184	3.54035	0.148481
gene	ENSDARG00000029841	0.837227	5.08448	7.44288	0.00636878	5.00838	4.39017	0.1485
gene	ENSDARG00000015537	2.97985	-2.79458	7.43355	0.00640191	-2.43403	-3.7226	0.149034
gene	ENSDARG00000075191	1.18906	-0.501773	7.43418	0.00639964	-0.331983	-1.2359	0.149034
gene	ENSDARG00000094252	1.56683	-1.37371	7.42492	0.00643267	-1.2839	-2.36348	0.149512
gene	ENSDARG00000100660	-0.906949	1.67687	7.42497	0.00643249	1.54863	2.66234	0.149512
gene	ENSDARG00000056976	-1.96999	-2.03942	7.41665	0.00646231	-2.51391	-0.714189	0.150082
gene	ENSDARG00000010658	0.554826	5.44295	7.41312	0.00647501	5.61013	5.22515	0.150257
gene	ENSDARG00000092759	-2.90113	-2.92846	7.40856	0.00649143	-3.85565	-2.25947	0.150519
gene	ENSDARG00000057296	2.24298	-1.9276	7.40371	0.00650896	-1.32657	-2.87461	0.150567
gene	ENSDARG00000079783	-0.60802	2.32413	7.40468	0.00650545	1.86308	2.64644	0.150567
gene	ENSDARG00000041032	-4.62669	-3.56755	7.40497	0.0065044	-4.20394	-2.72554	0.150567
gene	ENSDARG00000104962	4.72606	-3.56233	7.39401	0.00654413	-2.86463	-4.0452	0.151261
gene	ENSDARG00000026895	-4.59863	-3.38474	7.38161	0.00658941	-4.20394	-2.71967	0.152066
gene	ENSDARG00000090869	-4.62696	-1.264	7.38201	0.00658795	-4.20394	-2.72554	0.152066
gene	ENSDARG00000062114	-1.23023	-0.593801	7.37856	0.00660061	-1.46662	-0.181494	0.152205
gene	ENSDARG00000091489	-2.2307	-1.90022	7.36888	0.00663623	-3.40424	-1.79463	0.152906
gene	ENSDARG00000092883	4.57204	-3.5744	7.35947	0.00667106	-2.89639	-4.0452	0.153543
gene	ENSDARG00000079985	-1.24977	-0.932353	7.35857	0.0066744	-1.3923	-0.09354	0.153543
gene	ENSDARG00000087187	2.06341	-2.37664	7.35489	0.00668805	-1.79737	-3.04392	0.153736
gene	ENSDARG00000061486	2.51326	-2.99413	7.352	0.00669882	-2.13919	-3.46148	0.153862
gene	ENSDARG00000001953	0.594801	3.14262	7.35032	0.00670509	3.35721	2.96196	0.153885
gene	ENSDARG00000091625	1.90726	-2.09054	7.34136	0.00673858	-1.67041	-2.87341	0.154532
gene	ENSDARG00000087166	4.57091	-3.5744	7.33467	0.00676371	-2.89639	-4.0452	0.154987
gene	ENSDARG00000011797	0.981551	-0.0673364	7.3291	0.0067847	0.488185	-0.263825	0.155346
gene	ENSDARG00000112940	-1.78158	-2.29966	7.31561	0.00683583	-2.8804	-1.37369	0.156394
gene	ENSDARG00000101919	3.41295	1.17232	7.314	0.00684195	2.82485	-0.301499	0.156412
gene	ENSDARG00000098481	-3.0176	-2.3793	7.31157	0.00685119	-3.39863	-1.19763	0.156501
gene	ENSDARG00000102123	-1.58059	-1.11381	7.30997	0.0068573	-1.832	-0.229056	0.156518
gene	ENSDARG00000104262	3.71592	-2.40602	7.29581	0.00691156	-2.70311	-3.93104	0.157608
gene	ENSDARG00000088801	1.25637	-0.658023	7.29469	0.00691586	-0.547723	-1.48743	0.157608
gene	ENSDARG00000011581	-1.14603	0.130211	7.27851	0.00697842	-1.19922	0.0326196	0.15891
gene	ENSDARG00000063007	0.959622	1.23632	7.27252	0.00700175	0.941182	0.163078	0.159193
gene	ENSDARG00000096030	-1.49124	-0.308463	7.27308	0.00699956	-1.45873	0.0382682	0.159193
gene	ENSDARG00000100188	5.76809	-2.18068	7.26469	0.00703236	-1.9418	-4.0452	0.15969
gene	ENSDARG00000006639	0.539994	2.60709	7.26386	0.0070356	2.78292	2.42309	0.15969
gene	ENSDARG00000070843	-0.992341	0.143916	7.26273	0.00704002	-0.779962	0.309366	0.15969
gene	ENSDARG00000105241	-2.00849	-1.55488	7.25547	0.00706853	-2.74025	-0.95114	0.160213
gene	ENSDARG00000100623	0.569406	4.78415	7.25298	0.00707833	4.80183	4.42531	0.160311
gene	ENSDARG00000012405	1.31793	-1.13529	7.24788	0.00709848	-0.822171	-1.8006	0.160642
gene	ENSDARG00000078494	2.15702	-0.735585	7.24465	0.00711125	-1.01166	-2.58626	0.160807
gene	ENSDARG00000014866	0.928644	1.30681	7.23956	0.00713145	1.4389	0.714077	0.161139
gene	ENSDARG00000079872	-0.709382	2.45376	7.22027	0.00720847	2.70804	3.56289	0.162753
gene	ENSDARG00000013203	1.69575	-1.69394	7.21855	0.00721541	-1.41371	-2.55268	0.162784
gene	ENSDARG00000056915	-0.839867	1.71108	7.21114	0.00724525	0.933847	1.93099	0.163331
gene	ENSDARG00000103184	-1.27117	-0.921705	7.2081	0.00725755	-1.8876	-0.609432	0.163482
gene	ENSDARG00000068366	0.7719	0.707919	7.20156	0.00728403	1.02222	0.447504	0.163729
gene	ENSDARG00000096597	-1.18798	-0.676862	7.20169	0.00728349	-1.42343	-0.183291	0.163729
gene	ENSDARG00000094387	-2.14971	-0.951617	7.20124	0.00728532	-2.83843	-0.959991	0.163729
gene	ENSDARG00000079015	0.909573	0.445986	7.19968	0.00729167	0.745751	0.0437083	0.163746
gene	ENSDARG00000094272	4.56438	-3.5744	7.18841	0.0073376	-2.89639	-4.0452	0.164524
gene	ENSDARG00000098281	-1.458	-0.807551	7.18928	0.00733406	-1.60289	-0.163998	0.164524
gene	ENSDARG00000033533	0.847144	4.2801	7.18529	0.00735037	4.48764	3.82385	0.164684
gene	ENSDARG00000069230	-2.24052	-1.54486	7.18353	0.00735758	-3.40424	-1.79761	0.16472
gene	ENSDARG00000077138	-1.34787	-0.983162	7.18062	0.00736951	-1.83208	-0.487274	0.16486
gene	ENSDARG00000053520	2.46247	-2.81556	7.17333	0.00739954	-2.19661	-3.46148	0.165279
gene	ENSDARG00000068657	-2.54627	-2.86023	7.17383	0.00739748	-3.62419	-1.95193	0.165279
gene	ENSDARG00000071011	1.99562	-0.19627	7.16536	0.00743247	-1.57449	-2.87461	0.165888
gene	ENSDARG00000058876	1.08235	-0.296364	7.16172	0.00744758	0.167887	-0.650453	0.165971
gene	ENSDARG00000063594	0.897002	1.56938	7.16291	0.00744263	2.06047	1.36187	0.165971
gene	ENSDARG00000011496	-0.493853	4.47005	7.15686	0.0074678	4.19444	4.8593	0.166279
gene	ENSDARG00000093998	-4.48278	-3.53898	7.15566	0.00747276	-4.20394	-2.80026	0.166279
gene	ENSDARG00000079290	2.45418	-2.66922	7.14777	0.00750574	-2.20134	-3.46148	0.166886
gene	ENSDARG00000105744	1.10603	0.256587	7.14303	0.00752561	-0.112717	-0.949612	0.1672
gene	ENSDARG00000044400	4.56222	-3.5744	7.1394	0.00754085	-2.89639	-4.0452	0.167412
gene	ENSDARG00000075851	-0.937059	0.33499	7.13524	0.00755834	-0.10401	0.967689	0.167672
gene	ENSDARG00000090654	-0.744101	5.92221	7.13072	0.00757743	5.54357	6.47736	0.167968
gene	ENSDARG00000053315	5.01021	-2.40863	7.12611	0.00759692	-2.72461	-4.0452	0.168273
gene	ENSDARG00000038812	4.56135	-3.5744	7.1196	0.00762456	-2.89639	-4.0452	0.168374
gene	ENSDARG00000045015	1.62402	-1.31799	7.12344	0.00760826	-1.35117	-2.45675	0.168374
gene	ENSDARG00000007398	-1.22239	-0.976888	7.11971	0.00762412	-1.66198	-0.399077	0.168374
gene	ENSDARG00000077570	-1.54504	-1.46222	7.11997	0.007623	-2.29222	-0.836631	0.168374
gene	ENSDARG00000003655	0.913039	4.42979	7.11278	0.00765363	5.01773	4.23373	0.168888
gene	ENSDARG00000053113	0.499949	5.11807	7.09628	0.0077244	5.34616	5.02428	0.170322
gene	ENSDARG00000070148	1.59889	-0.581174	7.08508	0.00777282	0.645242	-0.722999	0.17126
gene	ENSDARG00000075299	1.52564	-1.59812	7.0832	0.00778101	-1.29254	-2.34299	0.171311
gene	ENSDARG00000016667	-2.00812	-2.29314	7.08003	0.00779478	-3.19741	-1.65608	0.171485
gene	ENSDARG00000098494	2.20105	-2.08972	7.07845	0.00780166	-1.71957	-3.04392	0.171507
gene	ENSDARG00000062278	1.5811	-0.512772	7.06784	0.00784798	-0.28979	-1.58843	0.172396
gene	ENSDARG00000075707	0.555108	4.23717	7.06106	0.00787772	4.3479	3.96397	0.172789
gene	ENSDARG00000003822	-0.824751	0.962984	7.06203	0.00787349	0.27671	1.26231	0.172789
gene	ENSDARG00000079328	-2.25844	-2.63574	7.05149	0.00791993	-3.40424	-1.80259	0.173585
gene	ENSDARG00000101318	4.88845	-2.73605	7.03962	0.0079726	-2.63977	-4.0452	0.174608
gene	ENSDARG00000098664	-2.43307	-2.63467	7.03716	0.00798355	-3.61845	-2.04402	0.174717
gene	ENSDARG00000089538	-1.09264	0.196567	7.0267	0.00803031	-0.617397	0.551476	0.175609
gene	ENSDARG00000104949	0.610145	1.49516	7.0217	0.00805276	2.02927	1.6089	0.175871
gene	ENSDARG00000028857	-1.75378	-1.9218	7.02135	0.00805434	-2.88056	-1.4007	0.175871
gene	ENSDARG00000097988	4.44494	-3.033	7.01714	0.0080733	-2.99179	-4.0452	0.176154
gene	ENSDARG00000111875	2.12492	-2.25834	7.015	0.00808297	-1.69302	-2.98539	0.176233
gene	ENSDARG00000100708	1.27554	-0.529725	7.01108	0.0081007	-0.631	-1.5837	0.176488
gene	ENSDARG00000089390	0.682843	2.50649	7.00896	0.00811026	1.65654	1.16782	0.176564
gene	ENSDARG00000052148	0.749973	1.31098	7.00703	0.00811901	1.70086	1.1454	0.176623
gene	ENSDARG00000038306	0.481445	6.27171	7.00547	0.0081261	6.32277	6.02343	0.176646
gene	ENSDARG00000026453	0.639816	2.68885	7.00172	0.00814314	2.85687	2.4197	0.176885
gene	ENSDARG00000068213	2.46508	-3.02588	6.99781	0.00816096	-2.19661	-3.46148	0.17714
gene	ENSDARG00000087152	-0.696423	4.66868	6.99368	0.00817981	4.18697	5.04955	0.177417
gene	ENSDARG00000091320	-0.863716	0.874226	6.98972	0.00819793	-0.208402	0.78173	0.177574
gene	ENSDARG00000070387	-1.46108	-1.6898	6.98945	0.00819917	-2.40414	-1.04333	0.177574
gene	ENSDARG00000036593	0.548918	3.11566	6.98605	0.00821474	3.36136	3.00174	0.177779
gene	ENSDARG00000063056	0.990662	3.0683	6.97638	0.00825923	3.476	2.67489	0.17861
gene	ENSDARG00000035924	0.507966	3.90972	6.97138	0.00828237	3.93766	3.61732	0.178978
gene	ENSDARG00000003517	0.769558	1.54149	6.96822	0.00829698	1.72732	1.13247	0.179028
gene	ENSDARG00000023537	-0.985973	0.383526	6.96942	0.00829144	-0.17249	0.963623	0.179028
gene	ENSDARG00000041493	0.436919	6.42901	6.95675	0.00835038	6.45376	6.19791	0.179915
gene	ENSDARG00000038293	-2.44079	-2.19102	6.95749	0.00834692	-3.62419	-2.04297	0.179915
gene	ENSDARG00000115978	3.88187	-2.38794	6.94909	0.00838619	-1.14757	-3.46148	0.180553
gene	ENSDARG00000030508	3.77731	-3.01629	6.94748	0.00839376	-2.3231	-3.83064	0.180583
gene	ENSDARG00000037777	0.723703	1.74119	6.94371	0.00841145	1.91691	1.38043	0.180729
gene	ENSDARG00000075842	-1.06823	-0.237965	6.9434	0.00841289	-1.34733	-0.212282	0.180729
gene	ENSDARG00000037033	0.442103	5.44505	6.93968	0.00843043	5.48562	5.22507	0.180972
gene	ENSDARG00000098856	2.8994	-3.11923	6.93632	0.00844629	-2.49894	-3.7226	0.18118
gene	ENSDARG00000052131	2.89701	-2.98257	6.93311	0.00846146	-2.49894	-3.72391	0.181372
gene	ENSDARG00000104077	4.63765	-2.94219	6.92974	0.00847741	-2.88056	-4.0452	0.181581
gene	ENSDARG00000056374	2.90908	-3.06901	6.92424	0.00850353	-2.49394	-3.7226	0.181876
gene	ENSDARG00000026531	-0.521918	5.46526	6.92421	0.00850364	5.43674	6.12543	0.181876
gene	ENSDARG00000001776	-2.44451	-2.18769	6.92053	0.00852115	-3.61845	-2.04926	0.182117
gene	ENSDARG00000103519	1.95819	-0.892649	6.91868	0.00853	-0.200429	-1.72409	0.182173
gene	ENSDARG00000052150	-0.586793	3.06669	6.91357	0.00855442	2.44031	3.2104	0.182561
gene	ENSDARG00000092064	1.99629	-2.79258	6.90491	0.00859594	-1.83342	-3.0427	0.183121
gene	ENSDARG00000102626	0.601842	3.8553	6.90492	0.00859589	4.05055	3.61582	0.183121
gene	ENSDARG00000116988	-4.40764	-2.97723	6.90418	0.00859946	-4.20394	-2.85048	0.183121
gene	ENSDARG00000061103	2.90682	-3.32424	6.90273	0.00860644	-2.49394	-3.72391	0.183136
gene	ENSDARG00000104312	-0.840395	1.11425	6.90063	0.00861652	0.535538	1.51861	0.183217
gene	ENSDARG00000038658	2.88955	-2.98137	6.88963	0.00866974	-2.50394	-3.72391	0.184091
gene	ENSDARG00000093574	2.17588	-1.77047	6.88461	0.00869408	-2.01102	-3.24173	0.184091
gene	ENSDARG00000054649	1.52811	-1.13698	6.88624	0.00868616	-0.426576	-1.59392	0.184091
gene	ENSDARG00000014506	0.561907	3.68568	6.88809	0.00867721	3.58589	3.21134	0.184091
gene	ENSDARG00000002632	-0.399854	5.95865	6.88577	0.00868845	5.74798	6.33022	0.184091
gene	ENSDARG00000016721	-0.40757	5.83458	6.8835	0.00869953	5.53855	6.12423	0.184091
gene	ENSDARG00000099960	-0.755639	0.880232	6.88204	0.00870662	0.215473	1.11433	0.184091
gene	ENSDARG00000075045	-1.37168	-1.53858	6.88046	0.00871433	-2.03566	-0.684108	0.184091
gene	ENSDARG00000069133	-1.73802	-0.146944	6.88148	0.00870934	-0.809233	0.97714	0.184091
gene	ENSDARG00000058502	0.479172	4.51319	6.87879	0.00872248	4.70537	4.40664	0.18413
gene	ENSDARG00000019392	0.789628	3.80351	6.87384	0.00874665	4.06893	3.46927	0.184507
gene	ENSDARG00000045815	2.90808	-2.73983	6.86457	0.00879214	-2.49394	-3.72391	0.185333
gene	ENSDARG00000068691	-2.88156	-3.02735	6.8602	0.00881368	-3.88468	-2.34521	0.185653
gene	ENSDARG00000054906	1.02349	-0.45719	6.85654	0.00883175	-0.072196	-0.830528	0.185899
gene	ENSDARG00000111731	1.12314	-0.615502	6.85103	0.00885901	-0.375478	-1.21623	0.186339
gene	ENSDARG00000073900	-2.13234	-1.87325	6.84338	0.00889702	-3.39863	-1.87816	0.187004
gene	ENSDARG00000061354	-0.647367	1.97626	6.84034	0.00891221	1.84885	2.6525	0.187188
gene	ENSDARG00000074424	-0.484947	5.70888	6.83446	0.00894159	5.25919	5.9136	0.187671
gene	ENSDARG00000054170	-2.54686	-3.03348	6.82794	0.00897429	-3.62419	-1.95193	0.188087
gene	ENSDARG00000093773	-2.88407	-2.89202	6.82832	0.00897236	-3.88468	-2.34632	0.188087
gene	ENSDARG00000027469	1.39693	-0.901235	6.82653	0.00898134	-0.545044	-1.58464	0.1881
gene	ENSDARG00000024492	-2.88882	-2.14084	6.8227	0.00900062	-3.88468	-2.34853	0.188368
gene	ENSDARG00000004880	1.95112	-2.12167	6.81802	0.00902424	-1.87878	-3.04392	0.188727
gene	ENSDARG00000058666	0.978162	0.055979	6.8132	0.00904864	0.190991	-0.549255	0.188967
gene	ENSDARG00000016750	-1.3147	0.0283594	6.81365	0.00904638	-0.779793	0.605357	0.188967
gene	ENSDARG00000112847	-2.87154	-2.70217	6.80973	0.00906623	-3.8788	-2.3441	0.189199
gene	ENSDARG00000077145	-1.3191	-1.2525	6.80719	0.00907917	-2.04932	-0.759158	0.189222
gene	ENSDARG00000098880	-2.42108	-1.72615	6.80697	0.00908028	-2.73505	-0.510418	0.189222
gene	ENSDARG00000098270	4.40442	-3.1633	6.7975	0.00912856	-3.01659	-4.0452	0.189933
gene	ENSDARG00000088630	1.08296	-0.209339	6.79646	0.00913389	0.0266071	-0.794749	0.189933
gene	ENSDARG00000095294	-2.8696	-2.7053	6.79734	0.00912938	-3.8788	-2.34299	0.189933
gene	ENSDARG00000029234	-0.624404	2.70683	6.78966	0.00916874	2.24688	3.0388	0.190522
gene	ENSDARG00000045296	0.625676	3.45139	6.77701	0.00923394	3.61028	3.18574	0.191187
gene	ENSDARG00000095339	-0.599125	3.86085	6.77799	0.00922888	3.43848	4.22529	0.191187
gene	ENSDARG00000063375	-0.68768	1.74373	6.77643	0.00923694	1.70726	2.56916	0.191187
gene	ENSDARG00000054914	-0.989379	-0.0979826	6.77918	0.0092227	-0.868675	0.225727	0.191187
gene	ENSDARG00000103750	-3.26776	-2.01816	6.77584	0.00923998	-3.62419	-1.4683	0.191187
gene	ENSDARG00000104932	-3.49094	-3.48002	6.77598	0.00923927	-4.07077	-2.58449	0.191187
gene	ENSDARG00000077822	1.94935	-2.66796	6.77211	0.00925932	-1.87878	-3.04515	0.191188
gene	ENSDARG00000078335	0.720459	2.73192	6.77204	0.0092597	2.89822	2.35916	0.191188
gene	ENSDARG00000061196	-2.86745	-2.3835	6.77326	0.00925334	-3.8788	-2.34188	0.191188
gene	ENSDARG00000062693	-1.93411	-2.04999	6.77035	0.00926846	-3.20844	-1.72409	0.191234
gene	ENSDARG00000099406	4.37672	-3.27149	6.76784	0.00928149	-3.03008	-4.0452	0.191368
gene	ENSDARG00000097973	4.37701	-3.63446	6.76055	0.00931953	-3.03008	-4.0452	0.192016
gene	ENSDARG00000038281	0.537464	4.76927	6.75327	0.00935758	4.8294	4.49249	0.192665
gene	ENSDARG00000093602	-2.12073	-2.81568	6.75114	0.00936876	-3.393	-1.87614	0.192759
gene	ENSDARG00000079585	4.38959	-3.26643	6.74323	0.00941042	-3.02467	-4.0452	0.193077
gene	ENSDARG00000013858	4.38945	-3.26916	6.74486	0.00940183	-3.02467	-4.0452	0.193077
gene	ENSDARG00000007382	2.42889	-1.61253	6.74542	0.00939886	-2.21551	-3.46021	0.193077
gene	ENSDARG00000002988	1.58152	-2.21563	6.74189	0.0094175	-1.38841	-2.46014	0.193077
gene	ENSDARG00000062634	-0.597902	2.01646	6.74068	0.00942389	1.55987	2.32181	0.193077
gene	ENSDARG00000043361	-1.67599	-1.67837	6.74117	0.00942128	-2.51888	-0.994529	0.193077
gene	ENSDARG00000067711	4.39048	-3.21875	6.73326	0.00946314	-3.02467	-4.0452	0.193264
gene	ENSDARG00000078624	4.36861	-3.5722	6.73598	0.00944871	-3.03548	-4.0452	0.193264
gene	ENSDARG00000091232	4.36861	-3.63648	6.73438	0.00945719	-3.03548	-4.0452	0.193264
gene	ENSDARG00000067859	2.49386	-1.37895	6.73613	0.00944795	-2.1438	-3.45893	0.193264
gene	ENSDARG00000102025	-0.550491	2.26567	6.73271	0.00946607	1.63178	2.35159	0.193264
gene	ENSDARG00000106873	-0.842154	1.12876	6.72948	0.00948321	0.986595	1.9953	0.193479
gene	ENSDARG00000069951	1.62188	-1.78336	6.72236	0.00952115	-1.50749	-2.58626	0.193982
gene	ENSDARG00000011027	-0.448267	4.21814	6.7232	0.00951669	3.86877	4.49448	0.193982
gene	ENSDARG00000062662	4.40938	-3.56353	6.71966	0.00953558	-3.01924	-4.0452	0.19414
gene	ENSDARG00000087070	-1.20268	-0.686327	6.71713	0.00954911	-0.920538	0.330327	0.194281
gene	ENSDARG00000009299	-0.5901	2.28423	6.71214	0.00957586	1.70512	2.45577	0.19462
gene	ENSDARG00000052277	-1.21533	1.56723	6.71154	0.00957911	0.857192	2.17787	0.19462
gene	ENSDARG00000037997	0.786931	2.1965	6.70442	0.00961743	2.32406	1.73276	0.195263
gene	ENSDARG00000070734	-0.767443	4.89628	6.69844	0.00964975	4.65225	5.58876	0.195783
gene	ENSDARG00000087681	1.94638	-2.10595	6.6964	0.00966078	-1.59073	-2.87581	0.19579
gene	ENSDARG00000074403	-1.23633	-0.705713	6.69445	0.00967137	-1.02199	0.255752	0.19579
gene	ENSDARG00000093546	-4.36201	-3.38471	6.69371	0.00967534	-4.20394	-2.87461	0.19579
gene	ENSDARG00000015964	-4.36655	-3.50401	6.69343	0.00967691	-4.20394	-2.87701	0.19579
gene	ENSDARG00000007024	4.39417	-3.1639	6.69105	0.00968979	-3.02467	-4.0452	0.195915
gene	ENSDARG00000112199	4.41491	-3.56282	6.68211	0.00973851	-3.01924	-4.0452	0.196473
gene	ENSDARG00000102358	2.66616	-3.1341	6.68087	0.00974529	-2.39759	-3.61937	0.196473
gene	ENSDARG00000115549	-1.37609	-0.0832355	6.67982	0.00975103	-1.15093	0.265127	0.196473
gene	ENSDARG00000012071	-4.36198	-2.81734	6.68336	0.0097317	-4.20394	-2.87461	0.196473
gene	ENSDARG00000092408	-4.36676	-3.07183	6.68061	0.00974675	-4.20394	-2.87701	0.196473
gene	ENSDARG00000025505	4.39528	-3.50153	6.67805	0.00976075	-3.02467	-4.0452	0.196534
gene	ENSDARG00000042182	2.79203	-2.87394	6.67538	0.00977539	-1.84502	-3.46148	0.196611
gene	ENSDARG00000039131	2.29076	-2.15792	6.67408	0.00978248	-1.49809	-2.93301	0.196611
gene	ENSDARG00000019658	-4.36194	-3.63594	6.67244	0.00979153	-4.20394	-2.87461	0.196611
gene	ENSDARG00000111964	-4.36962	-3.63433	6.67287	0.00978912	-4.20394	-2.8782	0.196611
gene	ENSDARG00000094466	4.48687	-3.6193	6.66805	0.00981567	-2.99339	-4.0452	0.196714
gene	ENSDARG00000073821	4.3573	-3.63922	6.66645	0.00982446	-3.04052	-4.0452	0.196714
gene	ENSDARG00000061471	0.963928	0.759111	6.66605	0.00982665	0.955728	0.201583	0.196714
gene	ENSDARG00000073789	-1.03585	1.54813	6.66539	0.00983033	1.3523	2.57575	0.196714
gene	ENSDARG00000100439	-2.5538	-2.07505	6.66689	0.00982206	-3.20844	-1.17891	0.196714
gene	ENSDARG00000058873	-4.3619	-3.16895	6.66257	0.00984591	-4.20394	-2.87461	0.196891
gene	ENSDARG00000096649	4.41804	-3.63041	6.66023	0.00985883	-3.01924	-4.0452	0.196919
gene	ENSDARG00000013335	0.772339	2.17705	6.6581	0.00987058	2.17441	1.61206	0.196919
gene	ENSDARG00000114964	-4.36189	-3.63594	6.65979	0.00986123	-4.20394	-2.87461	0.196919
gene	ENSDARG00000054610	-4.36713	-3.32785	6.65745	0.00987424	-4.20394	-2.87701	0.196919
gene	ENSDARG00000014287	4.39932	-3.38107	6.62988	0.0100282	-3.02467	-4.0452	0.19703
gene	ENSDARG00000068231	4.3988	-3.63243	6.63621	0.00999262	-3.02467	-4.0452	0.19703
gene	ENSDARG00000040684	4.37163	-3.49914	6.64868	0.00992294	-3.02896	-4.0452	0.19703
gene	ENSDARG00000102758	4.35855	-3.2738	6.65508	0.00988734	-3.04087	-4.0452	0.19703
gene	ENSDARG00000044695	4.3579	-3.5071	6.63584	0.00999468	-3.04087	-4.0452	0.19703
gene	ENSDARG00000094735	4.34992	-3.33222	6.64382	0.00995002	-3.04624	-4.0452	0.19703
gene	ENSDARG00000096307	2.85602	-2.12636	6.65074	0.00991146	-2.52384	-3.72391	0.19703
gene	ENSDARG00000101665	2.73069	-2.63172	6.63695	0.0099885	-2.44056	-3.65917	0.19703
gene	ENSDARG00000009568	1.1476	-1.05101	6.63801	0.00998254	-0.482464	-1.34634	0.19703
gene	ENSDARG00000057315	0.771865	0.740114	6.63866	0.0099789	0.895807	0.334284	0.19703
gene	ENSDARG00000003820	-0.636482	3.18303	6.65031	0.00991385	2.62902	3.43273	0.19703
gene	ENSDARG00000055455	-0.641915	5.4886	6.64211	0.00995961	4.70849	5.53878	0.19703
gene	ENSDARG00000054754	-0.65004	2.1134	6.63646	0.00999122	1.29364	2.10207	0.19703
gene	ENSDARG00000053215	-0.921834	-0.218898	6.63309	0.0100101	-0.602474	0.4268	0.19703
gene	ENSDARG00000067669	-4.35932	-3.5038	6.64342	0.00995229	-4.20394	-2.87341	0.19703
gene	ENSDARG00000114719	-4.3594	-2.44017	6.6494	0.0099189	-4.20394	-2.87341	0.19703
gene	ENSDARG00000073675	-4.36445	-2.53337	6.65191	0.00990498	-4.20394	-2.87581	0.19703
gene	ENSDARG00000032246	-4.36451	-3.6354	6.64225	0.00995882	-4.20394	-2.87581	0.19703
gene	ENSDARG00000099031	-4.36458	-3.56851	6.6312	0.0100208	-4.20394	-2.87581	0.19703
gene	ENSDARG00000063539	-4.36746	-3.32661	6.63673	0.00998972	-4.20394	-2.87701	0.19703
gene	ENSDARG00000051915	-4.36753	-3.21787	6.6326	0.0100129	-4.20394	-2.87701	0.19703
gene	ENSDARG00000044752	-4.36756	-3.21851	6.63082	0.0100229	-4.20394	-2.87701	0.19703
gene	ENSDARG00000057598	4.34863	-3.38715	6.62231	0.0100709	-3.04624	-4.0452	0.197218
gene	ENSDARG00000092345	0.931859	6.9716	6.62239	0.0100704	7.37729	6.6161	0.197218
gene	ENSDARG00000029931	0.505748	4.05341	6.62496	0.0100559	4.17187	3.85529	0.197218
gene	ENSDARG00000095843	-1.93149	-2.27639	6.62101	0.0100782	-3.20844	-1.72213	0.197218
gene	ENSDARG00000105143	-3.26643	-3.17455	6.62555	0.0100526	-3.88468	-2.03877	0.197218
gene	ENSDARG00000045016	-4.36464	-3.6354	6.62134	0.0100764	-4.20394	-2.87581	0.197218
gene	ENSDARG00000040246	2.15312	-2.39776	6.61806	0.010095	-1.52551	-2.87581	0.197281
gene	ENSDARG00000029356	1.1628	-0.824922	6.61834	0.0100934	-0.479609	-1.341	0.197281
gene	ENSDARG00000057113	-2.16713	1.67099	6.61638	0.0101045	0.865449	3.23813	0.197335
gene	ENSDARG00000111946	4.34809	-3.33061	6.61309	0.0101232	-3.04624	-4.0452	0.197568
gene	ENSDARG00000012860	4.40116	-3.50165	6.60731	0.0101561	-3.02467	-4.0452	0.197587
gene	ENSDARG00000023584	4.38264	-3.38288	6.60913	0.0101457	-3.03008	-4.0452	0.197587
gene	ENSDARG00000042272	0.931414	0.308414	6.6066	0.0101601	0.762582	0.0485999	0.197587
gene	ENSDARG00000105405	0.514339	11.4896	6.60967	0.0101426	11.3062	10.9879	0.197587
gene	ENSDARG00000045737	-4.36471	-3.26971	6.60904	0.0101462	-4.20394	-2.87581	0.197587
gene	ENSDARG00000079373	-4.36473	-3.11751	6.6058	0.0101647	-4.20394	-2.87581	0.197587
gene	ENSDARG00000088232	-4.36168	-3.56811	6.60151	0.0101892	-4.20394	-2.87461	0.197932
gene	ENSDARG00000058108	4.53935	-2.60862	6.59451	0.0102294	-2.89639	-4.0452	0.197934
gene	ENSDARG00000096210	1.46053	-0.450216	6.59803	0.0102092	0.0665157	-1.04741	0.197934
gene	ENSDARG00000001807	-0.956075	0.0179404	6.59439	0.01023	-0.398301	0.703275	0.197934
gene	ENSDARG00000104176	-4.35597	-3.63701	6.59638	0.0102186	-4.20394	-2.87221	0.197934
gene	ENSDARG00000034650	-4.35875	-3.32568	6.59804	0.0102091	-4.20394	-2.87341	0.197934
gene	ENSDARG00000016704	-4.36812	-3.02484	6.59499	0.0102266	-4.20394	-2.87701	0.197934
gene	ENSDARG00000008010	4.40233	-3.43878	6.59286	0.0102389	-3.02467	-4.0452	0.197974
gene	ENSDARG00000001873	-0.599477	5.70807	6.59084	0.0102505	5.22165	6.00829	0.198067
gene	ENSDARG00000104233	4.33085	-3.64594	6.58756	0.0102694	-3.05895	-4.0452	0.198301
gene	ENSDARG00000103900	-1.50764	-2.17372	6.58411	0.0102893	-2.51391	-1.13557	0.198555
gene	ENSDARG00000020031	4.42879	-2.97891	6.58099	0.0103073	-3.01924	-4.0452	0.198563
gene	ENSDARG00000093102	4.36826	-3.44169	6.56986	0.010372	-3.03548	-4.0452	0.198563
gene	ENSDARG00000027799	2.95238	-3.212	6.57397	0.0103481	-2.4839	-3.72391	0.198563
gene	ENSDARG00000079553	2.16379	-1.64639	6.57086	0.0103662	-1.11654	-2.58856	0.198563
gene	ENSDARG00000099645	1.07747	1.0273	6.5731	0.0103532	1.53399	0.648011	0.198563
gene	ENSDARG00000091131	-0.515083	4.15921	6.56863	0.0103792	3.6243	4.30865	0.198563
gene	ENSDARG00000076972	-0.8281	4.34184	6.568	0.0103829	3.52615	4.49196	0.198563
gene	ENSDARG00000032631	-1.41127	0.706632	6.57773	0.0103263	-0.0128938	1.47021	0.198563
gene	ENSDARG00000093724	-2.86165	-2.77663	6.57413	0.0103471	-3.8788	-2.34077	0.198563
gene	ENSDARG00000040291	-2.88775	-2.81405	6.57336	0.0103516	-3.88468	-2.34632	0.198563
gene	ENSDARG00000024775	-4.35535	-3.63701	6.56649	0.0103917	-4.20394	-2.87221	0.198563
gene	ENSDARG00000094519	-4.36156	-3.56847	6.56687	0.0103895	-4.20394	-2.87461	0.198563
gene	ENSDARG00000087016	-4.36157	-3.44302	6.5697	0.010373	-4.20394	-2.87461	0.198563
gene	ENSDARG00000090268	-4.36494	-3.6354	6.56969	0.010373	-4.20394	-2.87581	0.198563
gene	ENSDARG00000042018	-4.36851	-2.93658	6.57006	0.0103708	-4.20394	-2.87701	0.198563
gene	ENSDARG00000019726	1.79768	1.91792	6.56186	0.0104187	2.5284	0.993916	0.19895
gene	ENSDARG00000094627	4.43158	-3.37982	6.5594	0.0104331	-3.01924	-4.0452	0.198974
gene	ENSDARG00000105529	-4.36499	-3.218	6.55932	0.0104336	-4.20394	-2.87581	0.198974
gene	ENSDARG00000015752	-4.36501	-3.50397	6.55635	0.010451	-4.20394	-2.87581	0.199176
gene	ENSDARG00000042555	0.714799	1.56402	6.54651	0.010509	1.69048	1.1644	0.200151
gene	ENSDARG00000075949	-4.36149	-2.50543	6.54529	0.0105162	-4.20394	-2.87461	0.200157
gene	ENSDARG00000040523	0.694936	2.24553	6.54402	0.0105237	2.17111	1.67072	0.20017
gene	ENSDARG00000005179	-0.986011	2.18641	6.54216	0.0105347	0.13522	1.27714	0.200249
gene	ENSDARG00000088342	-1.6442	-1.3605	6.53989	0.0105482	-2.6374	-1.18572	0.200374
gene	ENSDARG00000043404	0.642183	1.53342	6.53856	0.0105561	1.49471	1.04205	0.200394
gene	ENSDARG00000060597	2.96202	-3.1638	6.53447	0.0105804	-2.4839	-3.7226	0.200725
gene	ENSDARG00000025914	1.2102	-1.14991	6.53129	0.0105993	-0.701554	-1.58464	0.200954
gene	ENSDARG00000044569	-0.708131	2.77072	6.53002	0.0106069	2.31889	3.2028	0.200967
gene	ENSDARG00000091667	-4.36143	-3.50327	6.52814	0.0106181	-4.20394	-2.87461	0.201048
gene	ENSDARG00000006079	4.35402	-3.57066	6.51881	0.0106739	-3.04087	-4.0452	0.201387
gene	ENSDARG00000104632	2.59831	-2.3243	6.51952	0.0106697	-1.20729	-3.04637	0.201387
gene	ENSDARG00000094206	1.32924	-0.288625	6.51958	0.0106693	-0.353143	-1.3764	0.201387
gene	ENSDARG00000036966	-0.546947	6.02335	6.52188	0.0106556	5.65284	6.36476	0.201387
gene	ENSDARG00000043553	-1.44579	-1.51281	6.52026	0.0106653	-2.13457	-0.760645	0.201387
gene	ENSDARG00000062517	-4.3693	-3.50395	6.51825	0.0106773	-4.20394	-2.87701	0.201387
gene	ENSDARG00000086317	0.818723	3.81214	6.51409	0.0107023	3.62166	2.94629	0.201728
gene	ENSDARG00000040427	4.43757	-3.43569	6.51148	0.010718	-3.01924	-4.0452	0.201764
gene	ENSDARG00000002210	0.62111	2.04226	6.51193	0.0107153	2.50567	2.07942	0.201764
gene	ENSDARG00000007412	-0.548072	4.9298	6.50953	0.0107298	4.38476	5.10061	0.201856
gene	ENSDARG00000096577	2.76624	-1.48056	6.50783	0.01074	-1.5112	-3.23593	0.201918
gene	ENSDARG00000002533	-0.763055	2.34571	6.50175	0.0107769	1.5402	2.47667	0.20248
gene	ENSDARG00000104542	-0.605909	2.29851	6.49324	0.0108286	1.7741	2.54537	0.203321
gene	ENSDARG00000061221	4.3681	-3.26051	6.49056	0.0108449	-3.03548	-4.0452	0.203497
gene	ENSDARG00000061042	1.69043	0.716282	6.48861	0.0108568	0.350581	-0.957491	0.20359
gene	ENSDARG00000112526	4.44104	-3.63041	6.48268	0.0108931	-3.01924	-4.0452	0.203932
gene	ENSDARG00000068995	0.391343	6.97742	6.48402	0.0108848	6.99773	6.78393	0.203932
gene	ENSDARG00000079670	-1.41529	-1.03441	6.48219	0.010896	-2.40414	-1.09284	0.203932
gene	ENSDARG00000101997	-0.98345	-0.363218	6.47406	0.010946	-0.853319	0.231929	0.204737
gene	ENSDARG00000061272	0.612781	2.94704	6.45859	0.0110417	3.38158	2.93533	0.206394
gene	ENSDARG00000102796	0.604809	2.02358	6.45269	0.0110784	2.83157	2.40487	0.206839
gene	ENSDARG00000089951	-0.932496	0.190732	6.4525	0.0110796	-0.640052	0.397444	0.206839
gene	ENSDARG00000098143	-4.36116	-3.63594	6.45075	0.0110905	-4.20394	-2.87461	0.20691
gene	ENSDARG00000097530	2.36043	-2.42016	6.44733	0.011112	-2.24341	-3.44347	0.206913
gene	ENSDARG00000059397	-4.36115	-3.02677	6.4478	0.011109	-4.20394	-2.87461	0.206913
gene	ENSDARG00000067661	-4.36116	-3.63594	6.44822	0.0111064	-4.20394	-2.87461	0.206913
gene	ENSDARG00000105091	-0.841745	0.916653	6.44611	0.0111196	0.309563	1.27586	0.206923
gene	ENSDARG00000089217	-1.43345	-1.73017	6.43892	0.0111646	-2.31144	-0.952728	0.20763
gene	ENSDARG00000068819	-4.30642	-3.64957	6.43152	0.0112113	-4.20394	-2.91379	0.208364
gene	ENSDARG00000060092	4.36795	-3.63648	6.41804	0.0112967	-3.03548	-4.0452	0.209673
gene	ENSDARG00000042122	1.92233	-2.54107	6.41701	0.0113032	-1.89641	-3.04392	0.209673
gene	ENSDARG00000058226	-1.26383	-0.896192	6.41828	0.0112952	-1.90081	-0.656184	0.209673
gene	ENSDARG00000002589	0.94153	-0.325632	6.41531	0.011314	0.215473	-0.485924	0.209741
gene	ENSDARG00000056617	0.689658	1.00303	6.41409	0.0113218	1.31771	0.829898	0.209752
gene	ENSDARG00000018896	-4.37621	-3.07442	6.41217	0.0113341	-4.20394	-2.8782	0.209846
gene	ENSDARG00000029445	0.497719	4.21861	6.41056	0.0113444	4.22817	3.91977	0.209903
gene	ENSDARG00000074362	-4.35217	-3.63701	6.40802	0.0113606	-4.20394	-2.87221	0.21007
gene	ENSDARG00000032264	1.57153	-1.00364	6.39587	0.0114386	-1.3923	-2.4624	0.211264
gene	ENSDARG00000110637	0.970968	0.674276	6.39572	0.0114396	0.819488	0.101047	0.211264
gene	ENSDARG00000019950	-0.633455	1.80772	6.3915	0.0114668	1.11728	1.90889	0.211632
gene	ENSDARG00000035088	-4.37118	-3.63487	6.3898	0.0114778	-4.20394	-2.87701	0.211702
gene	ENSDARG00000077840	2.02744	-1.53973	6.38475	0.0115105	-1.19554	-2.5828	0.212137
gene	ENSDARG00000094732	1.78191	-2.48117	6.38167	0.0115305	-1.76232	-2.87341	0.212137
gene	ENSDARG00000068708	0.70828	4.06123	6.38181	0.0115296	3.92421	3.40078	0.212137
gene	ENSDARG00000086775	0.514625	2.83243	6.38267	0.011524	2.85837	2.52841	0.212137
gene	ENSDARG00000069723	1.1102	-0.210924	6.38024	0.0115398	-0.523789	-1.34634	0.212158
gene	ENSDARG00000087046	1.09578	-0.452034	6.37843	0.0115516	-0.414905	-1.2359	0.212158
gene	ENSDARG00000093313	0.606809	7.25459	6.37815	0.0115534	7.72856	7.26736	0.212158
gene	ENSDARG00000101848	4.33423	-3.5736	6.37508	0.0115734	-3.04624	-4.0452	0.212345
gene	ENSDARG00000101634	1.77854	0.220729	6.37436	0.0115781	-0.190158	-1.52144	0.212345
gene	ENSDARG00000101084	4.34936	-3.6385	6.3732	0.0115856	-3.04087	-4.0452	0.21235
gene	ENSDARG00000102225	-2.59887	-2.56949	6.36967	0.0116087	-3.7801	-2.28856	0.21264
gene	ENSDARG00000101524	1.57984	-1.78454	6.365	0.0116393	-1.26979	-2.34521	0.213066
gene	ENSDARG00000036036	0.482464	9.42491	6.35865	0.0116811	9.34274	9.05033	0.213312
gene	ENSDARG00000041505	-0.510461	5.3338	6.35851	0.0116819	4.82057	5.52217	0.213312
gene	ENSDARG00000036094	-0.914935	1.39977	6.36054	0.0116686	0.395918	1.44633	0.213312
gene	ENSDARG00000070892	-4.37744	-3.38144	6.35955	0.0116751	-4.20394	-2.8782	0.213312
gene	ENSDARG00000097620	0.519563	2.68702	6.35715	0.0116909	2.79876	2.46045	0.213343
gene	ENSDARG00000103562	4.39117	-2.85972	6.35448	0.0117085	-3.03008	-4.0452	0.213531
gene	ENSDARG00000079175	4.33282	-3.27827	6.35013	0.0117373	-3.04624	-4.0452	0.213639
gene	ENSDARG00000071076	1.37882	-1.04531	6.35075	0.0117331	-0.941689	-1.95811	0.213639
gene	ENSDARG00000001470	0.50632	3.00131	6.34916	0.0117437	3.30256	2.98237	0.213639
gene	ENSDARG00000021607	-0.513433	3.59255	6.35222	0.0117235	3.16212	3.85783	0.213639
gene	ENSDARG00000079779	1.15064	-0.831443	6.34662	0.0117605	-0.350796	-1.23677	0.213812
gene	ENSDARG00000008732	0.841185	2.74674	6.3432	0.0117832	3.73057	3.10758	0.214091
gene	ENSDARG00000012981	-0.761852	1.31885	6.33826	0.0118161	0.885298	1.80362	0.214421
gene	ENSDARG00000077666	-1.097	-0.696287	6.33903	0.011811	-1.40589	-0.254144	0.214421
gene	ENSDARG00000033949	2.86781	-3.33269	6.33506	0.0118374	-2.51391	-3.7226	0.214675
gene	ENSDARG00000100099	-4.28639	-3.58576	6.33177	0.0118594	-4.20394	-2.92204	0.214941
gene	ENSDARG00000069441	-4.37812	-3.0731	6.32973	0.0118731	-4.20394	-2.8782	0.215055
gene	ENSDARG00000021787	0.724963	2.37238	6.32737	0.0118888	2.66998	2.13274	0.215207
gene	ENSDARG00000004931	2.84549	-2.6374	6.32293	0.0119186	-2.52384	-3.7226	0.215613
gene	ENSDARG00000097372	-1.39707	0.116023	6.32036	0.011936	-0.641829	0.858087	0.215793
gene	ENSDARG00000018871	1.43032	-1.28854	6.3164	0.0119627	-0.682847	-1.72409	0.216142
gene	ENSDARG00000061896	2.37103	-2.62885	6.31176	0.011994	-2.27773	-3.45893	0.216306
gene	ENSDARG00000041911	-1.15255	-0.813718	6.3137	0.0119808	-1.39933	-0.189271	0.216306
gene	ENSDARG00000038352	-1.99027	-2.65104	6.3118	0.0119937	-3.30778	-1.83283	0.216306
gene	ENSDARG00000099382	2.91227	-2.46786	6.31038	0.0120033	-2.49894	-3.7226	0.216342
gene	ENSDARG00000069888	4.4602	-3.63041	6.30893	0.0120132	-3.01924	-4.0452	0.216385
gene	ENSDARG00000105324	-4.29471	-3.39956	6.30525	0.0120381	-4.20394	-2.91662	0.216701
gene	ENSDARG00000022763	-4.35525	-3.16808	6.2998	0.0120752	-4.20394	-2.87341	0.217234
gene	ENSDARG00000070686	-0.691405	1.0482	6.29215	0.0121274	0.365254	1.21524	0.217965
gene	ENSDARG00000034307	-1.90992	-2.02777	6.29166	0.0121307	-3.04624	-1.52378	0.217965
gene	ENSDARG00000018106	0.494768	3.0287	6.29024	0.0121405	3.17756	2.86506	0.218006
gene	ENSDARG00000101387	2.33686	-3.16905	6.28804	0.0121555	-2.29222	-3.46021	0.218142
gene	ENSDARG00000005800	4.46277	-3.63041	6.28355	0.0121864	-3.01924	-4.0452	0.218293
gene	ENSDARG00000093186	4.46272	-3.63041	6.28407	0.0121828	-3.01924	-4.0452	0.218293
gene	ENSDARG00000016319	4.42465	-3.21257	6.28405	0.012183	-3.02467	-4.0452	0.218293
gene	ENSDARG00000098720	-1.40773	-0.0755376	6.28234	0.0121947	-1.17832	0.256739	0.218309
gene	ENSDARG00000059939	0.97345	-0.376694	6.27416	0.0122511	0.239626	-0.485924	0.219185
gene	ENSDARG00000097556	2.84024	-2.64169	6.2729	0.0122598	-2.52384	-3.72391	0.219206
gene	ENSDARG00000045542	0.649947	4.15726	6.26963	0.0122825	4.23969	3.78401	0.219425
gene	ENSDARG00000061737	-1.14257	-0.563891	6.26788	0.0122946	-1.63586	-0.459935	0.219425
gene	ENSDARG00000101688	-4.37286	-3.26811	6.26846	0.0122906	-4.20394	-2.87701	0.219425
gene	ENSDARG00000098832	-0.554714	2.67334	6.26311	0.0123278	2.27897	2.99934	0.219681
gene	ENSDARG00000099203	-0.701448	1.96893	6.26149	0.012339	1.25829	2.12175	0.219681
gene	ENSDARG00000074819	-1.85601	-2.02487	6.26461	0.0123173	-2.86995	-1.29405	0.219681
gene	ENSDARG00000088367	-2.31928	-2.2698	6.26204	0.0123352	-3.62419	-2.13765	0.219681
gene	ENSDARG00000075964	-0.386733	6.85993	6.25953	0.0123527	6.43567	6.99961	0.219791
gene	ENSDARG00000103247	-1.41531	-1.80781	6.25401	0.0123913	-2.27	-0.935103	0.220343
gene	ENSDARG00000031683	-2.01122	-1.32388	6.2484	0.0124306	-2.21079	-0.385055	0.220907
gene	ENSDARG00000073718	-0.640234	2.25607	6.2453	0.0124523	1.87567	2.68706	0.221159
gene	ENSDARG00000045755	0.512847	3.86095	6.24382	0.0124627	3.88901	3.5608	0.221209
gene	ENSDARG00000002196	-0.604377	1.83049	6.24042	0.0124867	1.50018	2.26604	0.2215
gene	ENSDARG00000055901	-1.93689	-1.77965	6.23878	0.0124982	-2.72984	-1.00177	0.221571
gene	ENSDARG00000086720	-1.17499	-1.51191	6.23439	0.0125293	-1.59586	-0.397118	0.221986
gene	ENSDARG00000090598	4.46792	-3.31885	6.231	0.0125533	-3.01924	-4.0452	0.222143
gene	ENSDARG00000076991	-1.08741	-0.879708	6.23181	0.0125475	-1.51551	-0.369558	0.222143
gene	ENSDARG00000094251	-1.64635	-0.861134	6.22865	0.0125699	-2.6222	-1.13053	0.222302
gene	ENSDARG00000015887	-0.446952	6.94752	6.22676	0.0125834	6.63747	7.27191	0.222406
gene	ENSDARG00000034871	0.399166	5.17705	6.22149	0.0126209	5.2261	5.00854	0.222799
gene	ENSDARG00000054734	-2.31975	-2.90238	6.222	0.0126173	-3.62419	-2.13765	0.222799
gene	ENSDARG00000088293	-1.45752	2.28424	6.21728	0.0126509	1.32444	3.021	0.223194
gene	ENSDARG00000095415	2.33537	-2.81822	6.20559	0.0127347	-2.29222	-3.46148	0.224454
gene	ENSDARG00000076025	-1.98297	-1.70134	6.20518	0.0127377	-2.62728	-0.871928	0.224454
gene	ENSDARG00000112725	1.92819	-1.38113	6.20227	0.0127587	-1.07537	-2.41747	0.224688
gene	ENSDARG00000075014	-0.48816	4.87188	6.20031	0.0127728	4.45936	5.11852	0.224801
gene	ENSDARG00000086070	1.61608	-2.38582	6.19851	0.0127858	-1.50749	-2.58856	0.224895
gene	ENSDARG00000042894	1.3486	-0.306092	6.18706	0.0128688	-0.0266848	-1.08705	0.226082
gene	ENSDARG00000092725	-0.843155	0.149232	6.18754	0.0128653	-0.459182	0.51575	0.226082
gene	ENSDARG00000110619	-4.38137	-3.63433	6.18139	0.0129101	-4.20394	-2.8782	0.226671
gene	ENSDARG00000008485	1.12329	-1.20983	6.16788	0.013009	-0.627984	-1.4628	0.228149
gene	ENSDARG00000007697	-4.38166	-3.63433	6.16777	0.0130099	-4.20394	-2.8782	0.228149
gene	ENSDARG00000031283	0.479866	7.33954	6.15968	0.0130695	7.7811	7.46573	0.228986
gene	ENSDARG00000028087	-0.470855	4.88408	6.15917	0.0130733	4.71985	5.37768	0.228986
gene	ENSDARG00000074508	1.16783	0.903055	6.15168	0.0131288	1.03839	0.103059	0.229764
gene	ENSDARG00000045932	0.674713	4.88168	6.15105	0.0131334	4.87019	4.36444	0.229764
gene	ENSDARG00000043518	-2.38493	-1.9756	6.14634	0.0131684	-3.63068	-2.09954	0.230238
gene	ENSDARG00000079336	-0.725306	2.1338	6.14444	0.0131826	1.43786	2.33179	0.230349
gene	ENSDARG00000075664	4.3212	-3.64051	6.14067	0.0132107	-3.04624	-4.0452	0.230687
gene	ENSDARG00000000747	0.530898	2.24256	6.13973	0.0132178	2.27275	1.92805	0.230687
gene	ENSDARG00000079396	1.10775	-1.20558	6.13652	0.0132417	-0.647926	-1.46188	0.230968
gene	ENSDARG00000036426	0.575672	4.35083	6.13107	0.0132827	4.60954	4.19977	0.231336
gene	ENSDARG00000038207	-1.00334	1.10432	6.13054	0.0132866	0.392904	1.49366	0.231336
gene	ENSDARG00000092696	-2.03578	-1.93386	6.13075	0.0132851	-3.20844	-1.65512	0.231336
gene	ENSDARG00000097993	2.67247	-2.24043	6.12408	0.0133353	-2.09274	-3.46148	0.231907
gene	ENSDARG00000074156	1.09154	-1.42222	6.12511	0.0133275	-0.482464	-1.28791	0.231907
gene	ENSDARG00000062363	-1.95515	-1.8389	6.11869	0.013376	-2.63235	-0.964633	0.232476
gene	ENSDARG00000102540	0.738381	2.43224	6.1145	0.0134078	2.84546	2.30476	0.232753
gene	ENSDARG00000069472	-1.61142	7.40869	6.11449	0.0134078	5.42573	7.27402	0.232753
gene	ENSDARG00000105080	-0.670782	1.02455	6.1122	0.0134252	0.647433	1.48199	0.232916
gene	ENSDARG00000002406	4.31942	-3.64051	6.1078	0.0134586	-3.04624	-4.0452	0.233081
gene	ENSDARG00000010732	0.901554	0.760329	6.10788	0.013458	0.755453	0.0634151	0.233081
gene	ENSDARG00000060116	-4.34661	-3.63701	6.10913	0.0134485	-4.20394	-2.87221	0.233081
gene	ENSDARG00000070568	0.63025	1.55311	6.09855	0.0135293	1.74579	1.30414	0.234165
gene	ENSDARG00000029621	-0.702324	1.36156	6.0967	0.0135435	0.771069	1.62555	0.234272
gene	ENSDARG00000052537	0.655	1.38828	6.09351	0.0135679	1.80069	1.34224	0.234556
gene	ENSDARG00000089767	0.573526	1.82402	6.08684	0.0136192	2.05435	1.66207	0.235146
gene	ENSDARG00000074527	0.546101	2.67403	6.08799	0.0136104	2.8094	2.45096	0.235146
gene	ENSDARG00000029479	-0.529305	2.5495	6.08595	0.0136261	2.19757	2.91042	0.235146
gene	ENSDARG00000069065	0.514618	3.19073	6.08274	0.0136509	3.00645	2.66895	0.235434
gene	ENSDARG00000013845	-0.497686	4.89835	6.07714	0.0136942	4.58195	5.25335	0.236041
gene	ENSDARG00000075181	2.04787	-2.78109	6.06219	0.0138106	-2.11139	-3.23593	0.237842
gene	ENSDARG00000116915	1.07925	1.08458	6.06164	0.0138149	1.18085	0.367659	0.237842
gene	ENSDARG00000101049	-0.913251	-0.716304	6.05979	0.0138294	-0.776834	0.240531	0.23795
gene	ENSDARG00000037960	4.31668	-3.22684	6.05687	0.0138523	-3.04624	-4.0452	0.238204
gene	ENSDARG00000076309	3.00762	-3.26352	6.0543	0.0138725	-2.47887	-3.72391	0.23841
gene	ENSDARG00000093509	-4.50525	-2.7937	6.05325	0.0138807	-4.20394	-2.76976	0.238412
gene	ENSDARG00000099198	2.23257	-2.24751	6.05077	0.0139002	-2.25333	-3.40044	0.238607
gene	ENSDARG00000101766	-0.471902	4.92667	6.04756	0.0139255	4.41312	5.0636	0.238783
gene	ENSDARG00000062538	-1.23914	-1.28289	6.04739	0.0139268	-1.95518	-0.723733	0.238783
gene	ENSDARG00000096226	-1.53982	-1.84168	6.04055	0.0139809	-2.69217	-1.32575	0.239569
gene	ENSDARG00000089641	0.980657	0.129038	6.03938	0.0139902	-0.0915298	-0.836631	0.239588
gene	ENSDARG00000022895	1.62937	-2.44503	6.03233	0.0140462	-1.68303	-2.7232	0.240406
gene	ENSDARG00000032630	-2.02692	-2.33068	6.02908	0.014072	-3.40424	-1.95605	0.240707
gene	ENSDARG00000102556	-0.509623	4.03182	6.02526	0.0141025	3.54783	4.22767	0.241002
gene	ENSDARG00000092359	-0.698766	0.702282	6.02486	0.0141057	0.240614	1.08454	0.241002
gene	ENSDARG00000043447	-1.21647	-0.516527	6.02128	0.0141344	-1.6276	-0.367622	0.241282
gene	ENSDARG00000069904	-1.75006	-1.64349	6.02075	0.0141386	-2.73505	-1.18487	0.241282
gene	ENSDARG00000100741	1.37937	-0.96013	6.01954	0.0141483	-0.602474	-1.65223	0.241306
gene	ENSDARG00000060917	1.03063	0.157929	6.01128	0.0142147	0.42545	-0.408216	0.242297
gene	ENSDARG00000027851	0.914547	0.0337719	6.00945	0.0142295	0.129372	-0.551327	0.242407
gene	ENSDARG00000098852	0.771914	2.62672	6.00051	0.0143017	2.80043	2.22519	0.243496
gene	ENSDARG00000057468	-1.10609	-1.07244	5.99485	0.0143477	-1.33195	-0.133274	0.244136
gene	ENSDARG00000076252	2.89165	-2.85699	5.99124	0.0143771	-2.54369	-3.7226	0.244352
gene	ENSDARG00000101482	-0.774571	0.489337	5.99168	0.0143735	-0.164965	0.751782	0.244352
gene	ENSDARG00000059368	-1.3562	0.380491	5.98132	0.0144582	-1.55413	-0.165485	0.245588
gene	ENSDARG00000042141	-0.763062	0.567215	5.97503	0.0145098	-0.00552978	0.912659	0.246321
gene	ENSDARG00000097181	-0.479667	9.35637	5.97167	0.0145375	8.89156	9.55908	0.246649
gene	ENSDARG00000100592	-0.680856	0.97267	5.96615	0.0145831	0.448498	1.28896	0.24702
gene	ENSDARG00000104380	-0.834191	0.471722	5.96594	0.0145848	-0.0885527	0.889851	0.24702
gene	ENSDARG00000002013	-0.906455	0.753534	5.96789	0.0145687	-0.342728	0.685153	0.24702
gene	ENSDARG00000075355	-4.27101	-2.79872	5.96433	0.0145981	-4.20394	-2.92937	0.247103
gene	ENSDARG00000019498	-0.582094	2.91683	5.96044	0.0146304	2.51245	3.28584	0.247506
gene	ENSDARG00000113295	1.8699	-2.47176	5.95869	0.0146449	-1.94619	-3.04515	0.247608
gene	ENSDARG00000098949	1.74765	-2.29427	5.95692	0.0146596	-1.80172	-2.87341	0.247713
gene	ENSDARG00000091393	0.915762	0.158501	5.95477	0.0146775	0.465442	-0.20865	0.247872
gene	ENSDARG00000102987	0.724695	3.12589	5.94862	0.0147288	3.5986	3.05142	0.248101
gene	ENSDARG00000062971	-0.423529	4.74876	5.94979	0.014719	4.39483	4.99647	0.248101
gene	ENSDARG00000037121	-0.599715	4.61966	5.94805	0.0147336	4.24395	5.03727	0.248101
gene	ENSDARG00000091148	-1.53943	-2.29828	5.9501	0.0147165	-2.74025	-1.4025	0.248101
gene	ENSDARG00000100956	-2.02583	-2.54023	5.95124	0.0147069	-3.40424	-1.95502	0.248101
gene	ENSDARG00000113268	3.55168	-3.56143	5.94436	0.0147645	-2.90337	-3.9511	0.248479
gene	ENSDARG00000060068	-0.54555	3.45275	5.94202	0.014784	2.86328	3.57264	0.248613
gene	ENSDARG00000092199	-1.62963	-1.25211	5.94137	0.0147895	-1.99631	-0.479467	0.248613
gene	ENSDARG00000069677	0.84882	0.542206	5.93901	0.0148094	0.391184	-0.240577	0.248804
gene	ENSDARG00000100131	0.706261	7.89842	5.93797	0.0148181	8.52929	7.99792	0.248807
gene	ENSDARG00000008388	1.50073	0.565038	5.92477	0.0149294	0.958632	-0.289991	0.25035
gene	ENSDARG00000096107	0.755133	2.85081	5.92404	0.0149356	2.84076	2.29996	0.25035
gene	ENSDARG00000043658	-0.45103	5.78449	5.92476	0.0149296	5.30671	5.94073	0.25035
gene	ENSDARG00000039459	-0.505527	5.46851	5.9219	0.0149538	5.05042	5.7441	0.250367
gene	ENSDARG00000101795	-1.48041	0.222236	5.92225	0.0149508	-0.599491	1.01123	0.250367
gene	ENSDARG00000101728	-0.866443	0.949726	5.91959	0.0149735	0.186176	1.21206	0.250553
gene	ENSDARG00000111462	-4.21711	-3.36749	5.91383	0.0150225	-4.20394	-2.96251	0.251229
gene	ENSDARG00000002791	-0.533375	9.28426	5.91014	0.0150539	8.76399	9.4599	0.251323
gene	ENSDARG00000042210	-0.565666	3.44371	5.91049	0.015051	3.14388	3.90224	0.251323
gene	ENSDARG00000115982	-1.72056	-1.98627	5.91161	0.0150414	-3.04087	-1.65416	0.251323
gene	ENSDARG00000007561	0.953407	2.5585	5.90802	0.0150721	2.46877	1.70614	0.251483
gene	ENSDARG00000075898	0.798553	1.6641	5.90496	0.0150983	2.1691	1.57461	0.251583
gene	ENSDARG00000100394	-0.467881	3.52809	5.9058	0.0150911	3.06729	3.71437	0.251583
gene	ENSDARG00000095651	-0.4866	5.16645	5.9043	0.015104	4.72571	5.39257	0.251583
gene	ENSDARG00000063604	2.76066	-3.16271	5.89104	0.0152181	-2.6018	-3.7226	0.252547
gene	ENSDARG00000093006	2.7449	-3.26775	5.89069	0.0152211	-2.60691	-3.72391	0.252547
gene	ENSDARG00000112601	1.76576	-2.66324	5.89566	0.0151782	-1.79301	-2.87461	0.252547
gene	ENSDARG00000051876	1.1237	-1.13323	5.8943	0.01519	-0.213783	-1.08953	0.252547
gene	ENSDARG00000018984	0.701042	2.44174	5.89156	0.0152136	1.9192	1.40234	0.252547
gene	ENSDARG00000012987	-0.466676	5.00114	5.89491	0.0151847	4.66695	5.31841	0.252547
gene	ENSDARG00000103197	-2.88741	-2.46843	5.89055	0.0152223	-3.80139	-2.11336	0.252547
gene	ENSDARG00000111474	2.87714	-2.87575	5.8883	0.0152418	-1.77931	-3.45893	0.252584
gene	ENSDARG00000059610	-0.447592	5.5899	5.88851	0.01524	5.17638	5.79769	0.252584
gene	ENSDARG00000105023	2.7572	-2.93176	5.88467	0.0152732	-2.6018	-3.72391	0.252961
gene	ENSDARG00000074563	-0.638727	2.10484	5.88235	0.0152934	1.71645	2.51674	0.253151
gene	ENSDARG00000103511	0.569649	4.15749	5.87619	0.015347	4.61233	4.21929	0.253895
gene	ENSDARG00000116353	-0.543949	3.585	5.87386	0.0153673	3.11139	3.84172	0.253943
gene	ENSDARG00000029353	-2.34092	-2.50522	5.87401	0.015366	-3.62419	-2.14299	0.253943
gene	ENSDARG00000019585	-1.71214	-1.56002	5.8671	0.0154265	-2.22961	-0.692085	0.254776
gene	ENSDARG00000077092	-0.750199	0.61559	5.86537	0.0154416	0.116164	0.997251	0.254882
gene	ENSDARG00000005397	-0.512286	4.20492	5.86207	0.0154706	3.803	4.48465	0.255216
gene	ENSDARG00000023002	2.72242	-3.02911	5.85168	0.0155622	-2.6222	-3.7226	0.256474
gene	ENSDARG00000014378	-0.552905	3.63382	5.85143	0.0155644	3.15441	3.87715	0.256474
gene	ENSDARG00000097615	-0.74755	1.25118	5.84546	0.0156173	0.665583	1.55169	0.257201
gene	ENSDARG00000070108	-0.429309	4.43619	5.84398	0.0156304	4.00554	4.61131	0.257273
gene	ENSDARG00000075648	1.21805	-1.29248	5.83776	0.0156858	-1.00822	-1.8731	0.258038
gene	ENSDARG00000053380	1.02409	1.93133	5.83637	0.0156982	2.51096	1.68408	0.258082
gene	ENSDARG00000015551	-0.416589	5.10125	5.83548	0.0157061	4.72426	5.32322	0.258082
gene	ENSDARG00000038609	2.73048	-3.02474	5.83287	0.0157295	-2.61711	-3.7226	0.25832
gene	ENSDARG00000036791	0.676826	0.813823	5.82516	0.0157985	1.26466	0.7756	0.259309
gene	ENSDARG00000063158	0.659525	1.48939	5.82235	0.0158238	1.46974	1.01376	0.259578
gene	ENSDARG00000100446	0.613091	3.4553	5.8186	0.0158575	4.28271	3.87533	0.259985
gene	ENSDARG00000028912	1.36381	-1.06742	5.81426	0.0158968	-0.706881	-1.7391	0.260482
gene	ENSDARG00000039299	-0.56436	5.74679	5.80661	0.015966	5.37979	6.12364	0.261471
gene	ENSDARG00000077360	1.99557	-1.34249	5.79903	0.016035	-0.653029	-2.13327	0.262454
gene	ENSDARG00000058964	-2.72272	-2.66682	5.78434	0.0161695	-3.88468	-2.46353	0.264507
gene	ENSDARG00000003205	0.587459	1.99797	5.78	0.0162096	2.10128	1.70522	0.265013
gene	ENSDARG00000101977	-4.15952	-3.5487	5.77587	0.0162477	-4.20394	-2.99339	0.265487
gene	ENSDARG00000069692	1.39218	-1.5751	5.77415	0.0162636	-0.502878	-1.52006	0.265599
gene	ENSDARG00000021849	-0.869867	1.59358	5.77307	0.0162736	0.626877	1.65768	0.265614
gene	ENSDARG00000056907	4.18127	-3.61222	5.76809	0.0163198	-3.14214	-4.0452	0.265631
gene	ENSDARG00000058716	2.02458	-2.70367	5.76991	0.0163029	-2.12068	-3.23968	0.265631
gene	ENSDARG00000089814	1.20575	-0.25088	5.76715	0.0163285	-0.127518	-1.06524	0.265631
gene	ENSDARG00000073705	0.669816	2.58105	5.76707	0.0163292	2.71427	2.22725	0.265631
gene	ENSDARG00000103044	-0.48789	4.32532	5.77063	0.0162962	3.76194	4.43064	0.265631
gene	ENSDARG00000111013	-1.30573	2.66941	5.76892	0.016312	1.67754	3.21667	0.265631
gene	ENSDARG00000101245	1.94931	-2.64805	5.75388	0.0164523	-2.03196	-3.1543	0.266327
gene	ENSDARG00000061728	0.794777	0.412635	5.75964	0.0163984	0.632029	0.0469699	0.266327
gene	ENSDARG00000062329	-0.447751	4.25195	5.7537	0.016454	3.87495	4.50932	0.266327
gene	ENSDARG00000017500	-0.450733	4.1282	5.75773	0.0164162	3.82089	4.44703	0.266327
gene	ENSDARG00000082753	-0.617687	4.52325	5.75641	0.0164286	3.54173	4.32465	0.266327
gene	ENSDARG00000075271	-0.805708	0.431993	5.75983	0.0163967	-0.225043	0.711698	0.266327
gene	ENSDARG00000099002	-1.05197	-0.605697	5.75754	0.0164181	-1.33099	-0.205936	0.266327
gene	ENSDARG00000074808	-1.44437	-1.41189	5.75448	0.0164467	-2.01277	-0.549255	0.266327
gene	ENSDARG00000037408	-2.71126	-3.02535	5.75944	0.0164003	-3.8788	-2.4624	0.266327
gene	ENSDARG00000003533	-2.71855	-2.86011	5.75243	0.0164659	-3.88468	-2.46127	0.266372
gene	ENSDARG00000105358	0.736261	2.545	5.74663	0.0165203	3.48115	2.90681	0.267105
gene	ENSDARG00000067976	2.12266	-1.40767	5.74455	0.0165399	-0.89644	-2.45788	0.267274
gene	ENSDARG00000100990	1.16651	-1.30125	5.73903	0.0165919	-0.73873	-1.58559	0.267818
gene	ENSDARG00000098587	-4.14568	-3.68698	5.7397	0.0165856	-4.20394	-2.9999	0.267818
gene	ENSDARG00000099710	-1.26317	0.783231	5.73711	0.0166101	0.105495	1.57553	0.267962
gene	ENSDARG00000078970	-0.860577	0.142838	5.7356	0.0166244	-0.209697	0.771759	0.268045
gene	ENSDARG00000070168	2.71943	-3.22272	5.73358	0.0166436	-2.6222	-3.72391	0.268189
gene	ENSDARG00000001754	0.847209	3.2437	5.73272	0.0166517	3.40291	2.77976	0.268189
gene	ENSDARG00000104817	0.646651	1.65277	5.731	0.016668	1.83408	1.37912	0.268305
gene	ENSDARG00000108432	0.739328	3.17729	5.72795	0.0166969	3.87017	3.30443	0.268474
gene	ENSDARG00000027807	-1.56486	-2.05365	5.72835	0.0166931	-2.75579	-1.4016	0.268474
gene	ENSDARG00000017605	0.614116	1.35636	5.72123	0.016761	1.40272	0.980377	0.26905
gene	ENSDARG00000018061	-0.488089	3.07616	5.72171	0.0167564	2.87116	3.5274	0.26905
gene	ENSDARG00000032155	-0.494008	3.29319	5.71944	0.0167781	3.05592	3.73084	0.26905
gene	ENSDARG00000074435	-0.540927	1.9722	5.71936	0.0167788	1.5203	2.23296	0.26905
gene	ENSDARG00000096380	-0.978054	5.8806	5.72304	0.0167437	5.45913	6.65331	0.26905
gene	ENSDARG00000098746	-0.923144	4.35247	5.7155	0.0168158	3.239	4.3215	0.269495
gene	ENSDARG00000040466	0.819178	0.563829	5.7131	0.0168388	0.716716	0.128761	0.269599
gene	ENSDARG00000079238	-0.526379	3.09014	5.7129	0.0168407	2.38716	3.09916	0.269599
gene	ENSDARG00000062521	-0.606582	2.81358	5.71114	0.0168576	2.43723	3.23773	0.269721
gene	ENSDARG00000062190	-0.581365	2.77798	5.70954	0.016873	2.234	2.98462	0.26982
gene	ENSDARG00000020834	0.47924	3.01906	5.70783	0.0168894	2.79019	2.49492	0.269935
gene	ENSDARG00000020594	2.37948	-2.73194	5.70324	0.0169336	-2.28256	-3.46021	0.270396
gene	ENSDARG00000102716	-0.694809	1.2687	5.70218	0.0169438	1.36446	2.20633	0.270396
gene	ENSDARG00000057142	-1.5246	-1.34516	5.70195	0.016946	-2.51888	-1.13473	0.270396
gene	ENSDARG00000104782	0.500378	4.46341	5.70028	0.0169622	4.54363	4.23322	0.270506
gene	ENSDARG00000068916	-2.72224	-2.97994	5.69596	0.0170041	-3.88468	-2.4624	0.271026
gene	ENSDARG00000091757	-2.72237	-3.22052	5.69	0.0170618	-3.88468	-2.4624	0.271798
gene	ENSDARG00000110470	2.19414	-2.0008	5.68822	0.0170791	-1.72386	-3.04637	0.271926
gene	ENSDARG00000024874	-0.509581	3.02428	5.68612	0.0170996	2.55732	3.23229	0.272084
gene	ENSDARG00000090945	-0.868048	1.17004	5.68515	0.0171091	0.657124	1.67259	0.272084
gene	ENSDARG00000078177	-4.14332	-3.3122	5.68434	0.017117	-4.20394	-3.0018	0.272084
gene	ENSDARG00000099375	-0.451868	3.17252	5.68104	0.0171492	2.73063	3.35887	0.272448
gene	ENSDARG00000104283	-0.595915	2.26467	5.67754	0.0171834	1.82101	2.59592	0.272843
gene	ENSDARG00000015158	-1.04326	-0.817592	5.67563	0.0172022	-1.34733	-0.239353	0.272914
gene	ENSDARG00000020863	-1.204	-1.86019	5.67518	0.0172066	-2.03109	-0.832817	0.272914
gene	ENSDARG00000079126	-2.72212	-2.80625	5.67353	0.0172227	-3.88468	-2.46022	0.273022
gene	ENSDARG00000077823	0.478732	3.1907	5.67248	0.0172331	3.25205	2.95907	0.273038
gene	ENSDARG00000053003	1.37907	-1.89527	5.67136	0.0172441	-1.14735	-2.13765	0.273064
gene	ENSDARG00000009978	0.845138	5.48737	5.66552	0.0173016	5.64391	5.01233	0.273827
gene	ENSDARG00000098909	-0.940875	0.292772	5.64309	0.0175243	-0.64609	0.40034	0.2772
gene	ENSDARG00000097808	-0.797711	2.33733	5.64074	0.0175478	1.17528	2.14931	0.277422
gene	ENSDARG00000045268	2.03792	-2.43036	5.63812	0.017574	-1.59444	-2.8782	0.277686
gene	ENSDARG00000012823	-0.735429	1.79729	5.63583	0.017597	1.33913	2.25177	0.277899
gene	ENSDARG00000069744	-0.871866	0.365977	5.63105	0.017645	-0.783158	0.205127	0.278507
gene	ENSDARG00000110634	-2.70927	-2.98395	5.62565	0.0176995	-3.88468	-2.45675	0.279216
gene	ENSDARG00000111899	1.48384	-0.292919	5.61673	0.0177898	-0.497414	-1.66089	0.280036
gene	ENSDARG00000098248	1.19223	-0.939139	5.61692	0.0177879	-0.934841	-1.79336	0.280036
gene	ENSDARG00000077883	1.06231	-0.216832	5.61707	0.0177864	0.268166	-0.584781	0.280036
gene	ENSDARG00000041140	-0.458051	4.40766	5.61796	0.0177773	3.80468	4.44531	0.280036
gene	ENSDARG00000098218	1.94254	-1.17966	5.61125	0.0178455	-1.46469	-2.68688	0.280761
gene	ENSDARG00000102585	-0.987117	0.253434	5.60555	0.0179037	-0.531808	0.557479	0.281525
gene	ENSDARG00000003495	-0.420097	4.07238	5.59885	0.0179722	3.70467	4.30282	0.282451
gene	ENSDARG00000069529	1.02487	-0.441735	5.5976	0.0179851	-0.369089	-1.13724	0.282501
gene	ENSDARG00000098527	1.76735	-1.40245	5.59227	0.0180399	-1.81357	-2.90056	0.283209
gene	ENSDARG00000037966	-0.733794	0.602952	5.58633	0.0181012	0.0818003	0.955944	0.28402
gene	ENSDARG00000098113	0.913476	1.24886	5.58411	0.0181242	2.03267	1.30501	0.284075
gene	ENSDARG00000101469	-1.60062	-0.218809	5.58484	0.0181165	-0.610882	0.994132	0.284075
gene	ENSDARG00000069630	-2.70637	-3.12536	5.5797	0.0181698	-3.88468	-2.45562	0.284638
gene	ENSDARG00000098094	1.94396	-2.11904	5.57869	0.0181803	-1.82911	-2.98194	0.284649
gene	ENSDARG00000087102	-4.10507	-3.69598	5.57718	0.018196	-4.20394	-3.02002	0.284743
gene	ENSDARG00000102640	-0.43223	6.70745	5.57568	0.0182116	6.40416	7.01416	0.284834
gene	ENSDARG00000094890	-0.76229	0.441983	5.56809	0.0182908	-0.0675805	0.826069	0.285919
gene	ENSDARG00000105756	1.49649	-1.89993	5.56066	0.0183685	-1.61933	-2.5828	0.286938
gene	ENSDARG00000032865	-1.23695	0.461629	5.55998	0.0183756	-0.45965	0.952882	0.286938
gene	ENSDARG00000088082	2.88707	-3.46043	5.55763	0.0184003	-2.74541	-3.80383	0.28717
gene	ENSDARG00000092061	-4.10706	-3.60956	5.55578	0.0184198	-4.20394	-3.02441	0.287322
gene	ENSDARG00000068738	-0.486376	3.2955	5.55395	0.0184391	2.84366	3.50871	0.287468
gene	ENSDARG00000100887	1.60679	-2.18872	5.55202	0.0184594	-1.54188	-2.58626	0.287548
gene	ENSDARG00000052423	-0.561428	2.7645	5.5516	0.0184639	2.30967	3.03136	0.287548
gene	ENSDARG00000063270	-0.434279	7.35866	5.54908	0.0184904	7.12675	7.72722	0.287655
gene	ENSDARG00000074235	-0.526384	4.54426	5.5498	0.0184828	4.07708	4.79567	0.287655
gene	ENSDARG00000095180	4.51944	-2.85246	5.54813	0.0185005	-3.01924	-4.0452	0.287658
gene	ENSDARG00000021177	0.671615	1.28219	5.54607	0.0185223	1.46861	1.00135	0.287844
gene	ENSDARG00000092608	1.18883	0.452487	5.54506	0.0185329	0.60171	-0.348276	0.287856
gene	ENSDARG00000063108	0.707509	1.35666	5.54252	0.0185599	1.03202	0.508062	0.288122
gene	ENSDARG00000095312	0.908933	0.361286	5.53811	0.0186067	0.792695	0.108879	0.288586
gene	ENSDARG00000111129	0.670176	1.88607	5.53784	0.0186095	1.90601	1.44464	0.288586
gene	ENSDARG00000055791	0.834808	0.11587	5.53632	0.0186257	0.0845801	-0.520659	0.288683
gene	ENSDARG00000037409	-0.7359	1.15314	5.53175	0.0186744	0.694805	1.57821	0.289285
gene	ENSDARG00000091851	0.695697	1.67298	5.52972	0.0186961	1.76742	1.28306	0.289468
gene	ENSDARG00000077665	-4.14347	-3.15811	5.52778	0.0187169	-4.20394	-2.99116	0.289636
gene	ENSDARG00000019808	-1.47435	-1.44394	5.51687	0.018834	-2.49362	-1.16591	0.291293
gene	ENSDARG00000109626	-1.35944	-0.767782	5.51584	0.018845	-2.03318	-0.68476	0.291309
gene	ENSDARG00000070692	2.75531	-3.38215	5.50979	0.0189104	-2.61183	-3.72391	0.291913
gene	ENSDARG00000101450	1.42994	0.0837292	5.51007	0.0189073	0.166532	-0.946355	0.291913
gene	ENSDARG00000006782	1.06568	0.0776432	5.50945	0.018914	0.266714	-0.518611	0.291913
gene	ENSDARG00000112234	0.463566	6.39724	5.50758	0.0189342	6.79313	6.5165	0.29207
gene	ENSDARG00000109926	-2.70584	-3.02759	5.50544	0.0189574	-3.88468	-2.45562	0.292218
gene	ENSDARG00000093431	-4.08762	-3.69968	5.50486	0.0189637	-4.20394	-3.03206	0.292218
gene	ENSDARG00000062481	2.26704	-2.94939	5.50105	0.0190051	-2.321	-3.46148	0.292671
gene	ENSDARG00000076590	0.829315	0.323656	5.5003	0.0190132	0.541524	-0.0615891	0.292671
gene	ENSDARG00000077284	1.02397	0.292384	5.4975	0.0190437	0.389235	-0.364397	0.29277
gene	ENSDARG00000104178	0.646804	4.71751	5.49695	0.0190497	4.60883	4.11059	0.29277
gene	ENSDARG00000116546	-1.62174	-2.29881	5.49706	0.0190484	-2.6315	-1.23594	0.29277
gene	ENSDARG00000007366	4.11274	-3.62314	5.49097	0.019115	-3.17984	-4.0452	0.293619
gene	ENSDARG00000044976	4.08371	-3.70177	5.4803	0.019232	-3.19188	-4.0452	0.293673
gene	ENSDARG00000070542	4.08371	-3.70177	5.4803	0.019232	-3.19188	-4.0452	0.293673
gene	ENSDARG00000078975	4.08371	-3.70177	5.4803	0.019232	-3.19188	-4.0452	0.293673
gene	ENSDARG00000087517	4.08371	-3.70177	5.4803	0.019232	-3.19188	-4.0452	0.293673
gene	ENSDARG00000091495	4.08371	-3.70177	5.4803	0.019232	-3.19188	-4.0452	0.293673
gene	ENSDARG00000098293	4.08371	-3.70177	5.4803	0.019232	-3.19188	-4.0452	0.293673
gene	ENSDARG00000101249	4.08371	-3.70177	5.4803	0.019232	-3.19188	-4.0452	0.293673
gene	ENSDARG00000114616	4.08371	-3.70177	5.4803	0.019232	-3.19188	-4.0452	0.293673
gene	ENSDARG00000117179	4.08371	-3.70177	5.4803	0.019232	-3.19188	-4.0452	0.293673
gene	ENSDARG00000057481	1.29217	-1.2197	5.48169	0.0192167	-1.14564	-2.04612	0.293673
gene	ENSDARG00000043431	0.785934	1.03353	5.47965	0.0192391	1.44454	0.855774	0.293673
gene	ENSDARG00000060434	-0.894889	-0.248164	5.48212	0.019212	-0.994453	-0.00156092	0.293673
gene	ENSDARG00000053973	1.31369	-1.46758	5.47838	0.0192531	-1.34349	-2.23882	0.293733
gene	ENSDARG00000037913	0.770484	0.0379901	5.47599	0.0192795	0.365254	-0.18389	0.293982
gene	ENSDARG00000071029	0.769729	2.21619	5.47268	0.0193159	2.37716	1.80132	0.294231
gene	ENSDARG00000024116	0.542393	2.36108	5.4731	0.0193114	2.80712	2.45518	0.294231
gene	ENSDARG00000057440	0.671026	1.74243	5.47105	0.019334	1.83107	1.34448	0.29425
gene	ENSDARG00000101312	0.656237	2.63147	5.47075	0.0193373	2.58134	2.13054	0.29425
gene	ENSDARG00000062017	4.10941	-3.50085	5.3503	0.0207187	-3.19188	-4.0452	0.294398
gene	ENSDARG00000098787	4.1091	-3.50067	5.35204	0.020698	-3.19188	-4.0452	0.294398
gene	ENSDARG00000037000	4.10832	-3.63156	5.35632	0.0206473	-3.19188	-4.0452	0.294398
gene	ENSDARG00000092639	4.10552	-3.43875	5.37153	0.0204681	-3.19188	-4.0452	0.294398
gene	ENSDARG00000101994	4.0939	-3.21619	5.43151	0.0197766	-3.19188	-4.0452	0.294398
gene	ENSDARG00000011862	4.0938	-3.43798	5.43202	0.0197708	-3.19188	-4.0452	0.294398
gene	ENSDARG00000077007	4.09273	-3.38095	5.43731	0.019711	-3.19188	-4.0452	0.294398
gene	ENSDARG00000068580	4.08856	-3.50085	5.4575	0.0194845	-3.19188	-4.0452	0.294398
gene	ENSDARG00000116290	4.08606	-3.63307	5.34706	0.0207572	-3.19741	-4.0452	0.294398
gene	ENSDARG00000002197	4.08498	-3.56664	5.35894	0.0206163	-3.19741	-4.0452	0.294398
gene	ENSDARG00000040254	4.08267	-3.63271	5.38397	0.0203225	-3.19741	-4.0452	0.294398
gene	ENSDARG00000101576	4.08252	-3.63307	5.38561	0.0203035	-3.19741	-4.0452	0.294398
gene	ENSDARG00000017444	4.07553	-3.70381	5.45814	0.0194773	-3.19741	-4.0452	0.294398
gene	ENSDARG00000022007	4.07553	-3.70381	5.45814	0.0194773	-3.19741	-4.0452	0.294398
gene	ENSDARG00000033587	4.07553	-3.70381	5.45814	0.0194773	-3.19741	-4.0452	0.294398
gene	ENSDARG00000042383	4.07553	-3.70381	5.45814	0.0194773	-3.19741	-4.0452	0.294398
gene	ENSDARG00000042726	4.07553	-3.70381	5.45814	0.0194773	-3.19741	-4.0452	0.294398
gene	ENSDARG00000068593	4.07553	-3.70381	5.45814	0.0194773	-3.19741	-4.0452	0.294398
gene	ENSDARG00000110841	4.0688	-3.6351	5.36959	0.0204908	-3.20293	-4.0452	0.294398
gene	ENSDARG00000110902	4.06803	-3.44275	5.4063	0.0200641	-3.20293	-4.0452	0.294398
gene	ENSDARG00000088641	4.06792	-2.93661	5.41122	0.0200078	-3.20293	-4.0452	0.294398
gene	ENSDARG00000078622	4.06784	-3.21638	5.41518	0.0199624	-3.20293	-4.0452	0.294398
gene	ENSDARG00000002216	4.06739	-3.70584	5.43616	0.019724	-3.20293	-4.0452	0.294398
gene	ENSDARG00000056324	4.06739	-3.70584	5.43616	0.019724	-3.20293	-4.0452	0.294398
gene	ENSDARG00000095401	4.05929	-3.70786	5.41435	0.0199719	-3.20844	-4.0452	0.294398
gene	ENSDARG00000109750	4.05887	-3.38586	5.40221	0.0201113	-3.20844	-4.0452	0.294398
gene	ENSDARG00000091728	4.05875	-3.32784	5.39872	0.0201515	-3.20844	-4.0452	0.294398
gene	ENSDARG00000045853	4.05771	-3.38415	5.36784	0.0205114	-3.20844	-4.0452	0.294398
gene	ENSDARG00000074082	4.0577	-3.63712	5.36766	0.0205135	-3.20844	-4.0452	0.294398
gene	ENSDARG00000109859	4.05161	-3.38378	5.36646	0.0205276	-3.21215	-4.0452	0.294398
gene	ENSDARG00000005004	4.05123	-3.70989	5.39271	0.020221	-3.21393	-4.0452	0.294398
gene	ENSDARG00000013210	4.05123	-3.70989	5.39271	0.020221	-3.21393	-4.0452	0.294398
gene	ENSDARG00000043157	4.05123	-3.70989	5.39271	0.020221	-3.21393	-4.0452	0.294398
gene	ENSDARG00000056077	4.05123	-3.70989	5.39271	0.020221	-3.21393	-4.0452	0.294398
gene	ENSDARG00000059695	4.05123	-3.70989	5.39271	0.020221	-3.21393	-4.0452	0.294398
gene	ENSDARG00000073965	4.05123	-3.70989	5.39271	0.020221	-3.21393	-4.0452	0.294398
gene	ENSDARG00000074081	4.05123	-3.70989	5.39271	0.020221	-3.21393	-4.0452	0.294398
gene	ENSDARG00000087968	4.05123	-3.70989	5.39271	0.020221	-3.21393	-4.0452	0.294398
gene	ENSDARG00000089974	4.05123	-3.70989	5.39271	0.020221	-3.21393	-4.0452	0.294398
gene	ENSDARG00000099612	4.05123	-3.70989	5.39271	0.020221	-3.21393	-4.0452	0.294398
gene	ENSDARG00000104392	4.05123	-3.70989	5.39271	0.020221	-3.21393	-4.0452	0.294398
gene	ENSDARG00000114159	4.05004	-3.6397	5.3771	0.0204027	-3.21393	-4.0452	0.294398
gene	ENSDARG00000017391	4.04865	-3.63913	5.35878	0.0206182	-3.21393	-4.0452	0.294398
gene	ENSDARG00000004577	4.04769	-3.57166	5.34604	0.0207694	-3.21393	-4.0452	0.294398
gene	ENSDARG00000088116	2.22927	-2.37405	5.36778	0.0205121	-2.37959	-3.46021	0.294398
gene	ENSDARG00000055825	2.08925	0.0964544	5.35017	0.0207202	1.14138	-0.554091	0.294398
gene	ENSDARG00000074680	1.97458	-1.1128	5.42708	0.0198267	-1.87436	-3.04515	0.294398
gene	ENSDARG00000076679	1.9089	-2.60184	5.35763	0.0206318	-1.89201	-3.04759	0.294398
gene	ENSDARG00000070972	1.88927	-2.54293	5.45634	0.0194974	-1.9052	-3.04392	0.294398
gene	ENSDARG00000018266	1.83057	1.52001	5.43292	0.0197606	-1.96414	-3.04759	0.294398
gene	ENSDARG00000069018	1.80894	-2.71489	5.41542	0.0199597	-1.97756	-3.04637	0.294398
gene	ENSDARG00000093622	1.74057	-2.03983	5.41831	0.0199266	-1.77082	-2.87701	0.294398
gene	ENSDARG00000001870	1.67253	-1.7756	5.46308	0.0194224	-1.3075	-2.46127	0.294398
gene	ENSDARG00000032426	1.61635	-1.77609	5.45742	0.0194854	-1.3806	-2.46014	0.294398
gene	ENSDARG00000069823	1.56427	-1.50732	5.35473	0.0206661	-1.07422	-2.23555	0.294398
gene	ENSDARG00000060326	1.3639	2.71865	5.37613	0.0204141	3.19143	2.04779	0.294398
gene	ENSDARG00000026395	1.27502	-1.42719	5.43357	0.0197533	-1.25819	-2.13872	0.294398
gene	ENSDARG00000102075	1.17388	-0.401152	5.37658	0.0204088	0.0602136	-0.829002	0.294398
gene	ENSDARG00000100388	1.16406	-0.718683	5.35298	0.0206869	-0.60903	-1.44867	0.294398
gene	ENSDARG00000006577	0.998889	-0.747519	5.44967	0.019572	-0.562723	-1.29229	0.294398
gene	ENSDARG00000104476	0.987774	0.100218	5.46309	0.0194223	0.165863	-0.571267	0.294398
gene	ENSDARG00000104897	0.955981	1.42847	5.35296	0.0206871	1.40654	0.686264	0.294398
gene	ENSDARG00000101762	0.83674	0.398224	5.43318	0.0197577	0.793961	0.163594	0.294398
gene	ENSDARG00000030478	0.772239	0.316101	5.43629	0.0197226	0.479066	-0.091236	0.294398
gene	ENSDARG00000043301	0.74691	0.549264	5.45092	0.019558	0.719629	0.185268	0.294398
gene	ENSDARG00000104374	0.614324	3.14306	5.37116	0.0204724	3.09632	2.66933	0.294398
gene	ENSDARG00000017708	0.569367	2.9195	5.37252	0.0204564	3.0734	2.66729	0.294398
gene	ENSDARG00000062476	0.548566	3.53309	5.35298	0.0206869	3.70918	3.34805	0.294398
gene	ENSDARG00000053912	0.531462	3.73479	5.35655	0.0206446	3.8451	3.50273	0.294398
gene	ENSDARG00000007639	0.483655	3.50846	5.44516	0.0196226	3.47759	3.16388	0.294398
gene	ENSDARG00000027744	0.436041	3.8029	5.34628	0.0207665	3.57917	3.31692	0.294398
gene	ENSDARG00000012506	0.416925	5.67748	5.35102	0.0207102	5.69808	5.45443	0.294398
gene	ENSDARG00000077523	0.363667	9.1981	5.38436	0.020318	9.18938	9.00332	0.294398
gene	ENSDARG00000022727	-0.403701	5.76555	5.39902	0.020148	5.51329	6.09514	0.294398
gene	ENSDARG00000061282	-0.420917	5.22246	5.43955	0.0196857	4.84412	5.43086	0.294398
gene	ENSDARG00000074715	-0.431702	5.16478	5.45338	0.0195305	4.60335	5.22676	0.294398
gene	ENSDARG00000101569	-0.571254	3.35739	5.35789	0.0206287	3.00168	3.75764	0.294398
gene	ENSDARG00000095170	-0.599791	1.79385	5.44052	0.0196748	1.0846	1.84288	0.294398
gene	ENSDARG00000074414	-0.602404	1.43153	5.45252	0.0195402	1.18006	1.95255	0.294398
[truncated: 8,001 more rows]

## Sheet: WT vs nrf2 mutant
	ID	logFC	logCPM	LR	PValue	Test_logCPM	control_logCPM	FDR
gene	ENSDARG00000041141	-0.103637	15.1227	5.89647e+06	0	15.0724	15.027	0
gene	ENSDARG00000041301	-0.117323	15.7109	1.59649e+07	0	15.7023	15.6702	0
gene	ENSDARG00000078189	-0.341092	15.4615	57671	0	15.1953	15.4034	0
gene	ENSDARG00000075963	-15.1701	6.19602	781.379	6.03497e-172	-3.869	7.18073	4.40794e-168
gene	ENSDARG00000091723	-10.3489	3.63549	742.67	1.57516e-163	-3.54387	4.64365	9.20396e-160
gene	ENSDARG00000053512	-0.49857	16.1754	640.711	2.34105e-141	15.9211	16.2763	1.13993e-137
gene	ENSDARG00000104207	4.01159	3.61738	453.087	1.53559e-100	5.26309	1.16877	6.40912e-97
gene	ENSDARG00000069583	-3.91821	3.45548	408.907	6.33875e-91	1.16406	4.91511	2.31491e-87
gene	ENSDARG00000098204	-4.08883	3.31371	407.304	1.41566e-90	1.03473	4.99474	4.59553e-87
gene	ENSDARG00000076241	-4.27131	4.40123	404.798	4.97196e-90	0.605775	4.67746	1.45261e-86
gene	ENSDARG00000038384	-3.5035	3.91588	391.268	4.38365e-87	1.98442	5.30888	1.1643e-83
gene	ENSDARG00000071644	-11.6416	2.61706	356.791	1.40722e-79	-3.869	3.59448	3.42611e-76
gene	ENSDARG00000009021	-11.6423	2.59024	351.259	2.25356e-78	-3.869	3.63078	5.06461e-75
gene	ENSDARG00000074001	-4.32808	5.20468	349.316	5.97207e-78	1.46456	5.56409	1.24628e-74
gene	ENSDARG00000092764	-3.35012	3.37707	313.479	3.81354e-70	1.64394	4.78985	7.42776e-67
gene	ENSDARG00000056084	-3.55266	3.21061	310.136	2.0403e-69	1.3092	4.73471	3.7256e-66
gene	ENSDARG00000031647	-3.15006	4.44562	305.649	1.93705e-68	2.79148	5.81824	3.32899e-65
gene	ENSDARG00000023181	-3.32305	3.42441	280.235	6.67433e-63	1.0677	4.17793	1.08332e-59
gene	ENSDARG00000007671	-4.93849	2.78298	271.263	6.02078e-61	-1.01622	3.57491	9.25805e-58
gene	ENSDARG00000117097	-0.884258	13.391	258.855	3.04875e-58	12.9272	13.661	4.45361e-55
gene	ENSDARG00000017489	-7.9791	2.19975	256.362	1.06557e-57	-3.06368	3.71793	1.48246e-54
gene	ENSDARG00000088251	-9.48065	2.05865	255.219	1.89098e-57	-3.54387	3.84579	2.51122e-54
gene	ENSDARG00000056798	-11.1476	2.27155	250.057	2.52383e-56	-3.869	3.15371	3.20592e-53
gene	ENSDARG00000012281	-5.605	2.32519	216.67	4.81648e-49	-1.62024	3.507	5.86326e-46
gene	ENSDARG00000036840	-2.78218	4.73588	204.712	1.95691e-46	2.36057	4.93192	2.28692e-43
gene	ENSDARG00000037099	3.71042	2.78381	196.783	1.05153e-44	3.66325	-0.0739816	1.1816e-41
gene	ENSDARG00000028804	-4.28754	2.59851	190.503	2.46868e-43	-0.750602	3.28994	2.67129e-40
gene	ENSDARG00000005541	4.00882	2.45862	181.554	2.21836e-41	4.11987	0.0116303	2.3147e-38
gene	ENSDARG00000105300	-2.27428	3.72305	175.529	4.5898e-40	2.31638	4.44928	4.62399e-37
gene	ENSDARG00000105358	-4.44472	2.545	175.27	5.22702e-40	-1.16452	2.90681	5.09042e-37
gene	ENSDARG00000042172	-2.18012	3.89794	173.164	1.5068e-39	2.82466	4.821	1.42009e-36
gene	ENSDARG00000040251	-3.95107	2.59784	171.638	3.24649e-39	-0.458143	3.22572	2.96404e-36
gene	ENSDARG00000075857	2.15295	3.62035	167.224	2.98878e-38	4.92937	2.66278	2.64607e-35
gene	ENSDARG00000103937	-2.48229	3.21536	163.813	1.6618e-37	1.81451	4.14023	1.42797e-34
gene	ENSDARG00000094310	-1.24193	11.8222	161.333	5.78784e-37	11.2041	12.2937	4.83136e-34
gene	ENSDARG00000098158	3.08606	2.75454	158.887	1.98082e-36	3.98652	0.833615	1.60755e-33
gene	ENSDARG00000100540	-2.31515	3.38681	154.807	1.54324e-35	1.8301	3.97408	1.1889e-32
gene	ENSDARG00000057113	-6.64033	1.67099	154.803	1.54635e-35	-2.5509	3.23813	1.1889e-32
gene	ENSDARG00000100614	-8.35194	1.70198	153.037	3.76016e-35	-3.54387	2.68516	2.81684e-32
gene	ENSDARG00000077228	3.27677	2.61105	149.374	2.37606e-34	3.79614	0.451568	1.73547e-31
gene	ENSDARG00000023217	-2.33203	4.94282	148.257	4.16726e-34	3.63046	5.79351	2.96953e-31
gene	ENSDARG00000021151	-4.02572	2.37456	146.35	1.08853e-33	-0.581812	3.108	7.57204e-31
gene	ENSDARG00000078322	-3.63725	2.61009	143.708	4.11493e-33	-0.550078	2.82425	2.79586e-30
gene	ENSDARG00000114210	7.46824	1.58776	138.555	5.50965e-32	2.7827	-3.44932	3.65841e-29
gene	ENSDARG00000102873	2.04139	3.63832	137.378	9.96825e-32	4.2151	2.06941	6.47183e-29
gene	ENSDARG00000071026	-5.04082	1.98692	129.547	5.14743e-30	-1.84745	2.67449	3.26929e-27
gene	ENSDARG00000102617	-3.56354	2.34366	129.319	5.7753e-30	0.0998771	3.40688	3.59003e-27
gene	ENSDARG00000097770	1.92126	4.42006	127.939	1.15717e-29	5.35152	3.37226	7.04334e-27
gene	ENSDARG00000100446	-2.05805	3.4553	127.368	1.54367e-29	1.96147	3.87533	9.20407e-27
gene	ENSDARG00000016421	-1.5072	10.5298	126.598	2.27438e-29	8.45268	9.76257	1.32897e-26
gene	ENSDARG00000005972	-2.16748	4.89876	124.32	7.1714e-29	2.84065	4.86068	4.10823e-26
gene	ENSDARG00000078722	2.01393	3.5229	121.281	3.31711e-28	3.85743	1.65955	1.86371e-25
gene	ENSDARG00000086374	-10.6046	0.797383	119.227	9.34184e-28	-3.869	2.6537	5.14964e-25
gene	ENSDARG00000079872	-3.09622	2.45376	118.372	1.43737e-27	0.671296	3.56289	7.77669e-25
gene	ENSDARG00000045524	4.18628	2.07088	118.106	1.64383e-27	3.02118	-1.14144	8.73201e-25
gene	ENSDARG00000053858	-2.34659	5.6341	117.675	2.04246e-27	4.07543	6.29072	1.06558e-24
gene	ENSDARG00000018266	6.34878	1.52001	116.012	4.72419e-27	2.54084	-3.04759	2.42144e-24
gene	ENSDARG00000023036	2.65738	2.74077	115.142	7.32545e-27	3.48642	0.78069	3.69e-24
gene	ENSDARG00000028012	-5.21192	1.57667	112.555	2.70084e-26	-1.76625	2.96158	1.33742e-23
gene	ENSDARG00000041179	-0.875279	12.3168	109.143	1.51019e-25	11.8149	12.5363	7.35361e-23
gene	ENSDARG00000070683	-7.01046	1.37923	109.051	1.5815e-25	-3.27776	2.17999	7.5746e-23
gene	ENSDARG00000020395	-1.81938	3.43047	107.865	2.87661e-25	2.48632	4.154	1.35553e-22
gene	ENSDARG00000030107	2.08729	3.12871	107.262	3.89991e-25	3.68167	1.51304	1.80857e-22
gene	ENSDARG00000056745	-9.45618	1.63765	106.181	6.72918e-25	-3.869	1.54876	3.07187e-22
gene	ENSDARG00000061921	-1.74409	4.21084	105.178	1.11641e-24	2.81347	4.40778	5.018e-22
gene	ENSDARG00000041062	-3.90239	2.518	104.725	1.40303e-24	-1.69615	1.82501	6.21073e-22
gene	ENSDARG00000056704	8.09035	0.714616	104.382	1.66879e-24	2.54718	-3.72391	7.27693e-22
gene	ENSDARG00000098911	3.22368	2.276	102.269	4.8474e-24	3.29765	0.0100123	2.08267e-21
gene	ENSDARG00000095724	1.95404	5.08694	102.1	5.27977e-24	6.08569	4.02835	2.23556e-21
gene	ENSDARG00000025218	-1.70191	4.37953	102.011	5.5207e-24	3.46951	5.02453	2.30418e-21
gene	ENSDARG00000103218	-4.94371	1.63475	101.446	7.34363e-24	-1.90478	2.5144	3.02185e-21
gene	ENSDARG00000068701	-1.72053	3.53186	100.336	1.28616e-23	2.56082	4.12595	5.21894e-21
gene	ENSDARG00000000212	-2.25573	6.23401	100.263	1.33462e-23	4.86467	6.99011	5.34139e-21
gene	ENSDARG00000104791	7.73056	1.02706	99.351	2.11493e-23	2.18159	-3.72391	8.34999e-21
gene	ENSDARG00000053544	1.77869	3.35812	98.8645	2.70389e-23	4.12401	2.24889	1.05329e-20
gene	ENSDARG00000116628	-4.32778	1.71409	98.4504	3.33264e-23	-1.05737	2.90813	1.28114e-20
gene	ENSDARG00000109774	1.66331	3.64705	95.1366	1.77692e-22	4.13471	2.36402	6.74214e-20
gene	ENSDARG00000053205	-4.52938	1.54646	92.8097	5.75731e-22	-1.33836	2.80686	2.15648e-19
gene	ENSDARG00000061177	-9.78652	0.21827	92.1227	8.14648e-22	-3.869	1.82126	3.01275e-19
gene	ENSDARG00000008732	-2.36713	2.74674	90.6792	1.68962e-21	0.899769	3.10758	6.17051e-19
gene	ENSDARG00000099985	1.54109	3.59861	90.373	1.97235e-21	4.81476	3.128	7.11408e-19
gene	ENSDARG00000078134	-1.57019	3.94064	90.1309	2.22917e-21	2.84174	4.26466	7.94236e-19
gene	ENSDARG00000077812	-1.70436	4.7766	89.8707	2.54246e-21	4.0391	5.61409	8.94946e-19
gene	ENSDARG00000051793	1.59751	3.49532	89.6229	2.88175e-21	4.4067	2.69388	1.0023e-18
gene	ENSDARG00000026784	1.86054	3.14346	89.3427	3.32017e-21	3.78478	1.73364	1.1412e-18
gene	ENSDARG00000103551	-5.51191	0.937385	88.9846	3.9789e-21	-2.154	2.76481	1.35172e-18
gene	ENSDARG00000016527	-9.68817	-0.153944	88.6329	4.7531e-21	-3.869	1.75264	1.59617e-18
gene	ENSDARG00000099424	3.67853	1.78014	87.9133	6.83885e-21	3.46605	-0.263207	2.2705e-18
gene	ENSDARG00000100598	3.69666	1.85892	86.0248	1.77691e-20	2.90633	-0.795502	5.83306e-18
gene	ENSDARG00000086259	3.71373	1.78423	84.3747	4.09361e-20	3.02405	-0.685558	1.32888e-17
gene	ENSDARG00000100904	-9.47996	-0.0384671	83.5534	6.20168e-20	-3.869	1.53813	1.99108e-17
gene	ENSDARG00000059805	9.42695	0.326397	83.4659	6.48246e-20	1.59098	-4.0452	2.0586e-17
gene	ENSDARG00000117011	-8.76198	1.73806	83.3435	6.89652e-20	-3.869	0.817948	2.16655e-17
gene	ENSDARG00000111013	-2.29299	2.66941	82.9426	8.44716e-20	1.05848	3.21667	2.62545e-17
gene	ENSDARG00000100280	-6.3298	0.385473	81.7049	1.57997e-19	-3.05806	2.07913	4.859e-17
gene	ENSDARG00000088377	-1.93409	3.04454	81.5233	1.73206e-19	1.39515	3.15681	5.27122e-17
gene	ENSDARG00000000551	-1.92394	5.60884	81.2188	2.02064e-19	3.95783	5.76536	6.0861e-17
gene	ENSDARG00000030687	1.82518	5.31355	80.2994	3.21764e-19	5.60297	3.64859	9.59251e-17
gene	ENSDARG00000063559	-1.50305	3.62369	79.1769	5.67913e-19	2.66063	4.0114	1.67597e-16
gene	ENSDARG00000039243	-9.3529	-0.335743	78.6308	7.48732e-19	-3.869	1.4216	2.18749e-16
gene	ENSDARG00000008398	-3.48768	1.80759	77.2488	1.50723e-18	-0.36912	2.82772	4.35992e-16
gene	ENSDARG00000040736	-0.537784	13.1467	77.1622	1.5748e-18	12.8239	13.2096	4.51074e-16
gene	ENSDARG00000010146	-9.06885	0.905812	76.3947	2.3227e-18	-3.869	1.11048	6.58834e-16
gene	ENSDARG00000032010	1.41423	4.23403	75.6709	3.35114e-18	5.10013	3.51461	9.41412e-16
gene	ENSDARG00000102744	-4.67286	1.42202	75.4545	3.73916e-18	-2.14898	1.92656	1.04041e-15
gene	ENSDARG00000103286	-2.04092	2.70927	75.1461	4.3713e-18	1.69666	3.5613	1.20483e-15
gene	ENSDARG00000013526	-1.85601	2.88806	74.7174	5.43144e-18	1.94332	3.66814	1.48304e-15
gene	ENSDARG00000054255	-7.09455	0.318513	74.6042	5.75199e-18	-3.54974	1.4294	1.55602e-15
gene	ENSDARG00000006892	1.46368	3.67162	74.1112	7.38393e-18	3.99059	2.41181	1.97916e-15
gene	ENSDARG00000110003	-1.71494	3.06357	73.8594	8.38842e-18	2.08383	3.63659	2.22796e-15
gene	ENSDARG00000098928	6.34461	0.502712	73.4831	1.015e-17	1.69658	-3.43855	2.67156e-15
gene	ENSDARG00000011998	-0.5135	13.182	72.6303	1.56364e-17	13.0606	13.4378	4.07886e-15
gene	ENSDARG00000077760	1.39239	3.9748	71.8671	2.30191e-17	4.36793	2.86606	5.95156e-15
gene	ENSDARG00000004964	9.00816	-0.347414	70.807	3.93933e-17	1.19178	-4.0452	1.00957e-14
gene	ENSDARG00000043457	-1.74659	5.52472	70.7444	4.06639e-17	4.71318	6.30311	1.03308e-14
gene	ENSDARG00000100565	-6.86357	0.271959	68.1605	1.50718e-16	-3.55547	1.17847	3.79602e-14
gene	ENSDARG00000036985	-2.91346	1.97557	67.9856	1.64695e-16	0.274921	2.98337	4.11259e-14
gene	ENSDARG00000012968	-1.35306	3.66627	67.9619	1.66686e-16	2.98956	4.2499	4.12703e-14
gene	ENSDARG00000019856	-1.76872	2.93012	66.6377	3.26285e-16	1.68226	3.2984	8.0107e-14
gene	ENSDARG00000113858	-8.76239	-0.121684	65.2326	6.65596e-16	-3.869	0.77326	1.6205e-13
gene	ENSDARG00000103976	-8.58004	0.981842	64.401	1.01505e-15	-3.869	0.588058	2.45088e-13
gene	ENSDARG00000102490	3.32562	1.65823	64.1427	1.15725e-15	2.76881	-0.583382	2.77134e-13
gene	ENSDARG00000094522	1.46734	4.88323	64.0685	1.20167e-15	5.53867	3.93619	2.8543e-13
gene	ENSDARG00000051857	-1.28372	3.82606	63.9923	1.24905e-15	3.28068	4.42167	2.94292e-13
gene	ENSDARG00000070132	-8.93789	-0.713547	63.7552	1.40881e-15	-3.869	1.01327	3.29278e-13
gene	ENSDARG00000022832	-8.67977	0.0320303	63.5787	1.54088e-15	-3.869	0.708523	3.57289e-13
gene	ENSDARG00000099889	-1.56936	3.09317	63.5611	1.55472e-15	2.1247	3.53893	3.57658e-13
gene	ENSDARG00000096153	-8.20417	1.64708	63.507	1.59798e-15	-3.869	0.313157	3.64739e-13
gene	ENSDARG00000035468	-1.61362	3.03338	63.3885	1.69709e-15	2.02255	3.48408	3.84357e-13
gene	ENSDARG00000110147	-1.34628	4.46602	63.3266	1.75122e-15	3.70727	4.90304	3.93566e-13
gene	ENSDARG00000076534	1.78671	2.77588	63.2723	1.8002e-15	3.6885	1.8076	4.01487e-13
gene	ENSDARG00000102370	-2.64966	2.06794	63.2167	1.85168e-15	0.622833	3.05655	4.08318e-13
gene	ENSDARG00000101271	-6.08931	-0.390843	63.2092	1.85879e-15	-3.28925	1.27632	4.08318e-13
gene	ENSDARG00000070734	-1.45346	4.89628	63.0535	2.0117e-15	4.26369	5.58876	4.3861e-13
gene	ENSDARG00000115199	-5.01614	0.597903	62.6422	2.47885e-15	-2.56144	1.71003	5.36459e-13
gene	ENSDARG00000068966	-4.96831	0.764006	62.5417	2.6086e-15	-2.5297	1.66047	5.60389e-13
gene	ENSDARG00000010047	-5.96502	0.30517	62.3356	2.89636e-15	-3.27776	1.13559	6.17664e-13
gene	ENSDARG00000014427	-6.1094	-0.532725	62.0556	3.33897e-15	-3.28925	1.3306	7.06894e-13
gene	ENSDARG00000096359	1.26841	4.14503	61.9285	3.56164e-15	4.8504	3.44866	7.48611e-13
gene	ENSDARG00000089586	-8.60215	0.110324	61.8059	3.79038e-15	-3.869	0.623089	7.90997e-13
gene	ENSDARG00000056477	1.32862	3.44991	61.7842	3.83235e-15	4.26265	2.81822	7.94084e-13
gene	ENSDARG00000089709	-1.5457	3.46968	61.7062	3.98715e-15	1.43578	2.78301	8.20342e-13
gene	ENSDARG00000093411	2.86572	1.87242	61.5766	4.25851e-15	3.05339	0.181083	8.70047e-13
gene	ENSDARG00000105405	0.828343	11.4896	61.1771	5.2166e-15	11.9482	10.9879	1.05839e-12
gene	ENSDARG00000075151	-3.5879	1.32663	61.0558	5.54812e-15	-0.538307	2.8205	1.11789e-12
gene	ENSDARG00000006978	1.71782	6.27983	60.2801	8.2273e-15	7.04012	5.19207	1.64636e-12
gene	ENSDARG00000093318	-1.69726	7.01668	59.4538	1.25197e-14	5.91986	7.45222	2.48827e-12
gene	ENSDARG00000103518	-1.41953	3.30378	59.3886	1.29417e-14	2.16846	3.51472	2.55476e-12
gene	ENSDARG00000055120	-1.66353	5.90574	59.1731	1.44397e-14	5.0231	6.53545	2.83135e-12
gene	ENSDARG00000008219	-0.792155	11.5951	59.1188	1.48435e-14	11.1121	11.7448	2.89112e-12
gene	ENSDARG00000076572	-4.7286	0.743755	59.0171	1.56306e-14	-2.40531	1.60549	3.02425e-12
gene	ENSDARG00000071005	2.66913	1.94802	58.9985	1.5779e-14	3.2289	0.480099	3.03288e-12
gene	ENSDARG00000078389	-8.80566	-0.825151	58.914	1.64716e-14	-3.869	0.888475	3.14532e-12
gene	ENSDARG00000068103	-8.49675	-0.201908	58.8537	1.69846e-14	-3.869	0.541034	3.22223e-12
gene	ENSDARG00000104505	-8.61549	-0.594577	58.5972	1.93494e-14	-3.869	0.64971	3.64717e-12
gene	ENSDARG00000104555	3.11563	1.70017	58.5277	2.00447e-14	2.62048	-0.520659	3.75401e-12
gene	ENSDARG00000039493	-1.4843	5.13737	58.4961	2.0369e-14	4.09037	5.43937	3.79044e-12
gene	ENSDARG00000026531	-1.56361	5.46526	58.3162	2.23196e-14	4.71005	6.12543	4.12715e-12
gene	ENSDARG00000002847	-6.44657	-0.242835	57.548	3.29838e-14	-3.54974	0.799395	6.06072e-12
gene	ENSDARG00000020028	-1.56675	5.5344	56.5447	5.49357e-14	4.3073	5.71353	1.00313e-11
gene	ENSDARG00000037097	-6.28404	0.833228	56.3088	6.19364e-14	-3.54974	0.639458	1.12393e-11
gene	ENSDARG00000098800	2.84331	1.76744	56.0928	6.91282e-14	3.05803	0.0888226	1.23905e-11
gene	ENSDARG00000057536	-0.578764	12.5471	56.0984	6.89331e-14	12.1709	12.5979	1.23905e-11
gene	ENSDARG00000053862	-0.317183	13.8496	56.0262	7.15134e-14	13.5678	13.728	1.27398e-11
gene	ENSDARG00000103001	1.53921	3.04924	55.368	9.99508e-14	3.26613	1.63996	1.7698e-11
gene	ENSDARG00000109460	-8.42283	-0.53269	55.1598	1.1112e-13	-3.869	0.449452	1.95572e-11
gene	ENSDARG00000104004	-3.29254	1.53055	55.0298	1.18713e-13	-0.779391	2.21118	2.07684e-11
gene	ENSDARG00000099982	6.42676	-0.542438	54.8547	1.29777e-13	0.905485	-3.7226	2.25688e-11
gene	ENSDARG00000089390	1.95566	2.50649	54.8358	1.31032e-13	3.22383	1.16782	2.26522e-11
gene	ENSDARG00000055216	1.14452	3.86794	54.5528	1.51327e-13	5.06641	3.8156	2.60069e-11
gene	ENSDARG00000116618	-6.25184	-0.177592	53.6257	2.42571e-13	-3.54688	0.679379	4.14442e-11
gene	ENSDARG00000087198	5.03161	-0.247417	53.3849	2.74191e-13	1.26797	-3.04759	4.65742e-11
gene	ENSDARG00000028159	-1.16548	3.91134	53.2432	2.94702e-13	3.39978	4.42722	4.97689e-11
gene	ENSDARG00000009477	2.06318	2.34917	52.958	3.40754e-13	3.24517	1.10372	5.72153e-11
gene	ENSDARG00000021688	-8.6892	-1.00632	52.7855	3.72041e-13	-3.869	0.755618	6.21118e-11
gene	ENSDARG00000040738	-0.943206	10.6003	52.5628	4.16699e-13	9.81465	10.5762	6.9172e-11
gene	ENSDARG00000104804	-8.18729	0.0624357	52.5128	4.27447e-13	-3.869	0.258323	7.05553e-11
gene	ENSDARG00000028628	-8.18721	-0.0072518	52.4238	4.47265e-13	-3.869	0.240083	7.34117e-11
gene	ENSDARG00000071643	-8.34669	-0.656996	52.3033	4.7557e-13	-3.869	0.376793	7.76216e-11
gene	ENSDARG00000102975	-2.39713	2.0713	51.9	5.83998e-13	0.611987	2.78456	9.47894e-11
gene	ENSDARG00000034168	1.17166	4.11635	51.6761	6.5455e-13	4.50451	3.17276	1.05654e-10
gene	ENSDARG00000043395	-3.05657	1.59599	51.579	6.87739e-13	-0.516905	2.26702	1.10401e-10
gene	ENSDARG00000061796	-8.18917	-0.426205	51.1646	8.49363e-13	-3.869	0.264634	1.35601e-10
gene	ENSDARG00000100303	1.29892	4.89671	50.8917	9.76075e-13	5.69435	4.24788	1.54984e-10
gene	ENSDARG00000102305	1.13946	3.94957	50.7124	1.06943e-12	4.54435	3.26257	1.68888e-10
gene	ENSDARG00000008026	2.70517	1.7393	50.1847	1.39934e-12	2.91602	0.154081	2.19802e-10
gene	ENSDARG00000006396	-1.20445	4.54385	50.0787	1.47699e-12	3.97009	5.01603	2.30758e-10
gene	ENSDARG00000042934	1.30123	4.945	49.9761	1.5563e-12	5.72156	4.26192	2.41856e-10
gene	ENSDARG00000010035	-1.50989	5.83459	49.8301	1.6765e-12	5.03737	6.39667	2.59157e-10
gene	ENSDARG00000052713	1.57949	2.9935	49.817	1.68776e-12	2.76765	1.08878	2.59524e-10
gene	ENSDARG00000088619	1.27076	3.26307	49.6998	1.79168e-12	3.89704	2.50138	2.74061e-10
gene	ENSDARG00000074583	-8.18874	-0.61675	49.6269	1.85947e-12	-3.869	0.239585	2.8295e-10
gene	ENSDARG00000086216	-4.35964	0.691276	49.4235	2.06261e-12	-2.4105	1.24704	3.12234e-10
gene	ENSDARG00000054748	1.79006	2.52185	49.3239	2.16999e-12	3.46202	1.57199	3.26796e-10
gene	ENSDARG00000039304	4.0687	0.0428637	49.2277	2.27905e-12	1.80794	-2.04507	3.41461e-10
gene	ENSDARG00000000324	1.17991	4.54281	49.141	2.38212e-12	5.39677	4.09984	3.55082e-10
gene	ENSDARG00000063037	-1.12764	3.81949	48.8916	2.70503e-12	3.23386	4.20719	4.01169e-10
gene	ENSDARG00000107506	-8.31038	-0.860428	48.8279	2.79441e-12	-3.869	0.3484	4.1233e-10
gene	ENSDARG00000057108	-1.19786	3.48955	48.7713	2.87616e-12	2.70401	3.77691	4.22261e-10
gene	ENSDARG00000076182	-3.94436	0.367569	48.6856	3.00462e-12	-1.69271	1.83401	4.38915e-10
gene	ENSDARG00000061093	-2.20188	2.1369	48.5385	3.23869e-12	0.913695	2.94554	4.70754e-10
gene	ENSDARG00000023683	-4.61124	-0.136904	48.1609	3.92635e-12	-2.70054	1.03123	5.67882e-10
gene	ENSDARG00000089179	2.83071	1.59738	47.9934	4.2766e-12	2.67712	-0.201425	6.15493e-10
gene	ENSDARG00000044875	-2.50251	1.93184	47.832	4.64351e-12	0.171754	2.415	6.65024e-10
gene	ENSDARG00000029473	1.80724	2.48208	47.6518	5.0906e-12	3.34234	1.43532	7.25497e-10
gene	ENSDARG00000091926	8.03528	-0.632928	47.0986	6.75047e-12	0.255003	-4.0452	9.57387e-10
gene	ENSDARG00000045598	-1.10618	4.0488	47.0462	6.93315e-12	3.4234	4.38572	9.78545e-10
gene	ENSDARG00000113332	-1.57625	3.03415	47.0278	6.9987e-12	0.950284	2.40918	9.83048e-10
gene	ENSDARG00000071143	8.42095	-1.0865	47.0154	7.04318e-12	0.615809	-4.0452	9.84562e-10
gene	ENSDARG00000023768	4.53394	0.268453	46.7689	7.98699e-12	1.07547	-2.87581	1.11118e-09
gene	ENSDARG00000044125	-1.4506	7.48633	46.7589	8.02812e-12	6.51608	7.83478	1.11161e-09
gene	ENSDARG00000016011	-1.1158	3.92891	46.5939	8.73327e-12	3.08357	4.05841	1.19789e-09
gene	ENSDARG00000076486	-1.12188	3.97996	46.5986	8.71231e-12	3.06894	4.0351	1.19789e-09
gene	ENSDARG00000101757	-3.33368	1.18586	46.5308	9.01888e-12	-0.978866	2.02327	1.23129e-09
gene	ENSDARG00000115564	3.98401	0.365481	46.5192	9.07274e-12	1.61505	-2.11535	1.23288e-09
gene	ENSDARG00000115174	-1.10308	4.14653	46.2521	1.03973e-11	3.49808	4.45402	1.40633e-09
gene	ENSDARG00000101578	-1.10071	3.78077	45.8517	1.27552e-11	3.15188	4.09297	1.71731e-09
gene	ENSDARG00000041569	-4.91016	-0.0520951	45.7978	1.31113e-11	-3.06929	0.658512	1.75715e-09
gene	ENSDARG00000036140	-0.38524	13.3027	45.7372	1.35233e-11	13.3152	13.5562	1.8041e-09
gene	ENSDARG00000096217	3.96014	0.286915	45.7202	1.36411e-11	1.57659	-2.13593	1.81154e-09
gene	ENSDARG00000070951	1.67239	2.59525	45.5455	1.49132e-11	3.31001	1.51701	1.97151e-09
gene	ENSDARG00000020015	1.0624	3.91768	45.384	1.61951e-11	4.69041	3.49979	2.13133e-09
gene	ENSDARG00000036247	-4.00289	0.778037	45.3248	1.6692e-11	-2.16401	1.18723	2.18687e-09
gene	ENSDARG00000027992	-3.15973	1.41808	45.2961	1.69385e-11	-1.04567	1.73487	2.20926e-09
gene	ENSDARG00000104906	1.20573	3.23783	45.1138	1.85912e-11	3.99998	2.66581	2.40336e-09
gene	ENSDARG00000056001	1.09656	4.16713	45.1208	1.8525e-11	4.51149	3.28394	2.40336e-09
gene	ENSDARG00000003835	-1.10393	4.33313	44.9242	2.04812e-11	3.76463	4.7261	2.63603e-09
gene	ENSDARG00000013500	-1.07697	3.91197	44.5269	2.50882e-11	3.28875	4.20828	3.21481e-09
gene	ENSDARG00000053204	1.31124	5.27166	44.4441	2.6172e-11	5.97139	4.52831	3.33904e-09
gene	ENSDARG00000090338	-1.06737	3.82559	44.2287	2.92172e-11	3.33053	4.25677	3.71134e-09
gene	ENSDARG00000022689	4.89242	-0.392445	44.1522	3.03807e-11	0.729919	-3.23718	3.84244e-09
gene	ENSDARG00000114529	1.06756	3.98188	43.8382	3.56681e-11	4.3803	3.19255	4.49172e-09
gene	ENSDARG00000103841	-4.57107	0.191478	43.6665	3.89375e-11	-2.87898	0.63546	4.88239e-09
gene	ENSDARG00000004055	1.0538	3.86962	43.4966	4.24699e-11	4.43286	3.25697	5.30256e-09
gene	ENSDARG00000036787	-4.25613	-0.106389	43.247	4.82481e-11	-2.5509	0.932877	5.99837e-09
gene	ENSDARG00000038518	-1.31481	5.3101	43.2316	4.86283e-11	4.19626	5.35437	6.02001e-09
gene	ENSDARG00000021149	-3.59285	0.788157	43.2155	4.90319e-11	-1.52615	1.64914	6.04437e-09
gene	ENSDARG00000105046	-4.12634	0.209596	43.0295	5.39205e-11	-2.4105	0.993147	6.61908e-09
gene	ENSDARG00000088378	-4.50752	-0.263924	43.0121	5.4403e-11	-2.80376	0.761137	6.65037e-09
gene	ENSDARG00000090202	-5.8109	-0.440303	42.8774	5.82803e-11	-3.54974	0.232243	7.09466e-09
gene	ENSDARG00000100505	-1.05068	4.08221	42.8604	5.87881e-11	3.56039	4.46947	7.12677e-09
gene	ENSDARG00000019897	-1.2661	5.18	42.8005	6.06153e-11	4.48668	5.61404	7.31792e-09
gene	ENSDARG00000092077	4.84815	-0.459888	42.7449	6.23627e-11	0.700189	-3.23718	7.4979e-09
gene	ENSDARG00000004049	3.30044	1.16421	42.5529	6.87957e-11	1.79131	-1.46555	8.23744e-09
gene	ENSDARG00000071152	1.04439	3.81774	42.5098	7.03296e-11	4.37463	3.20637	8.38673e-09
gene	ENSDARG00000088823	-3.05553	1.50338	42.2406	8.07066e-11	-1.21919	1.47325	9.58506e-09
gene	ENSDARG00000082753	1.08012	4.52325	42.1341	8.52228e-11	5.53987	4.32465	1.00804e-08
gene	ENSDARG00000071011	4.35102	-0.19627	42.1064	8.64388e-11	0.889035	-2.87461	1.0183e-08
gene	ENSDARG00000099240	-3.82204	0.628904	41.8538	9.83577e-11	-2.08381	1.19536	1.15406e-08
gene	ENSDARG00000021366	1.3928	7.22716	41.7221	1.05213e-10	7.8438	6.37903	1.22956e-08
gene	ENSDARG00000013414	-1.58835	2.55929	41.6311	1.10223e-10	2.06154	3.43205	1.28298e-08
gene	ENSDARG00000010729	-5.37449	-0.902583	41.048	1.48536e-10	-3.28925	0.652272	1.72207e-08
gene	ENSDARG00000027750	-1.37562	7.25855	40.8482	1.64527e-10	6.40214	7.63634	1.89993e-08
gene	ENSDARG00000012586	-1.01646	4.10007	40.8186	1.67036e-10	3.75306	4.62318	1.92131e-08
gene	ENSDARG00000024548	-0.370106	13.2664	40.8109	1.67695e-10	13.0469	13.2665	1.92133e-08
gene	ENSDARG00000099428	3.80855	0.0152646	40.7745	1.70849e-10	1.31867	-2.24316	1.94981e-08
gene	ENSDARG00000104117	-1.05142	3.61519	40.7045	1.77083e-10	3.08662	3.98111	2.0131e-08
gene	ENSDARG00000100959	-3.05804	1.10523	40.6182	1.85079e-10	-0.608376	2.16292	2.09584e-08
gene	ENSDARG00000008494	1.17467	3.11712	40.1822	2.31349e-10	4.05079	2.75058	2.60969e-08
gene	ENSDARG00000112943	4.12546	-0.18404	40.1229	2.38479e-10	0.933258	-2.72554	2.67977e-08
gene	ENSDARG00000069471	-1.63725	2.57056	39.8904	2.68619e-10	1.28268	2.73165	3.00688e-08
gene	ENSDARG00000013838	-1.17666	4.98381	39.8445	2.75013e-10	4.23128	5.25458	3.06671e-08
gene	ENSDARG00000101421	-2.50142	1.64299	39.8002	2.81318e-10	0.192251	2.45743	3.12509e-08
gene	ENSDARG00000056803	-1.18338	5.03191	39.6123	3.09732e-10	4.273	5.31292	3.4277e-08
gene	ENSDARG00000100538	-7.58933	-0.404807	39.589	3.13448e-10	-3.869	-0.373445	3.45574e-08
gene	ENSDARG00000058538	-1.98291	2.20118	39.495	3.28902e-10	0.702017	2.46876	3.61248e-08
gene	ENSDARG00000075618	-1.22541	3.09327	39.4574	3.35297e-10	2.33321	3.40694	3.66893e-08
gene	ENSDARG00000019420	-1.37748	6.79562	39.4336	3.394e-10	6.27365	7.49701	3.69997e-08
gene	ENSDARG00000078717	-1.00512	3.96162	39.3908	3.46929e-10	3.44308	4.29653	3.76799e-08
gene	ENSDARG00000010207	-1.00049	3.79292	39.2543	3.72044e-10	3.39882	4.25128	4.02579e-08
gene	ENSDARG00000076801	-1.0175	4.18202	39.1815	3.86177e-10	3.55658	4.43134	4.1633e-08
gene	ENSDARG00000010701	-0.221115	14.1122	39.083	4.06156e-10	13.7477	13.8145	4.36259e-08
gene	ENSDARG00000060962	-3.03623	0.921379	38.9956	4.24762e-10	-0.406953	2.36039	4.54573e-08
gene	ENSDARG00000114291	-7.59392	-0.60489	38.8732	4.52248e-10	-3.869	-0.255963	4.82222e-08
gene	ENSDARG00000051814	-1.49087	2.68969	38.7727	4.76129e-10	1.64652	2.9671	5.0584e-08
gene	ENSDARG00000058270	-1.33394	5.92267	38.6833	4.98453e-10	5.28327	6.46122	5.27637e-08
gene	ENSDARG00000028583	-3.7568	0.239328	38.4276	5.68243e-10	-2.154	0.979898	5.99343e-08
gene	ENSDARG00000059351	1.57075	2.50814	38.4102	5.73328e-10	3.45007	1.76488	6.02531e-08
gene	ENSDARG00000035870	-0.990486	4.08166	38.3788	5.82617e-10	3.63543	4.48878	6.10098e-08
gene	ENSDARG00000040735	-0.148269	14.5405	38.318	6.01047e-10	14.4655	14.4661	6.2496e-08
gene	ENSDARG00000040177	-1.16349	3.14194	38.3179	6.01087e-10	2.604	3.57493	6.2496e-08
gene	ENSDARG00000052396	-4.6438	-0.87388	38.3043	6.05282e-10	-2.87898	0.78097	6.2709e-08
gene	ENSDARG00000093185	1.27942	5.61493	38.266	6.17293e-10	6.55517	5.16041	6.37273e-08
gene	ENSDARG00000032326	1.3037	2.88638	38.2075	6.36086e-10	3.55077	2.11645	6.54362e-08
gene	ENSDARG00000004952	-8.34051	-1.39231	38.1603	6.51634e-10	-3.869	0.401605	6.68005e-08
gene	ENSDARG00000056156	3.49835	0.295192	38.0134	7.02591e-10	1.44691	-1.8731	7.17724e-08
gene	ENSDARG00000053518	-1.97306	2.1152	37.8963	7.4607e-10	0.941015	2.67377	7.59484e-08
gene	ENSDARG00000042133	3.42711	0.219898	37.7951	7.85777e-10	1.55371	-1.71919	7.97127e-08
gene	ENSDARG00000096380	-1.30903	5.8806	37.7274	8.13555e-10	5.49632	6.65331	8.22451e-08
gene	ENSDARG00000012600	-8.1096	-1.28999	37.6164	8.61165e-10	-3.869	0.189351	8.67579e-08
gene	ENSDARG00000093019	1.55305	2.59114	37.595	8.7068e-10	2.98255	1.2893	8.7415e-08
gene	ENSDARG00000007561	1.51963	2.5585	37.2353	1.047e-09	3.36215	1.70614	1.04757e-07
gene	ENSDARG00000018485	-2.63732	1.36986	37.0096	1.17549e-09	-0.0829151	2.37028	1.17212e-07
gene	ENSDARG00000007912	-7.84847	-1.1337	36.9926	1.18581e-09	-3.869	-0.0638684	1.17839e-07
gene	ENSDARG00000070116	-7.61263	-0.872132	36.8689	1.26347e-09	-3.869	-0.322963	1.25131e-07
gene	ENSDARG00000069866	3.2563	0.52678	36.8558	1.27198e-09	1.78592	-1.39979	1.25548e-07
gene	ENSDARG00000098374	2.81804	1.07994	36.5638	1.47754e-09	2.49385	-0.336148	1.45346e-07
gene	ENSDARG00000089920	1.48375	2.56206	36.4246	1.58684e-09	3.48496	1.87542	1.55574e-07
gene	ENSDARG00000092352	-5.47604	-0.469273	36.3356	1.66105e-09	-3.54387	-0.113249	1.62305e-07
gene	ENSDARG00000086317	0.982474	3.81214	36.2418	1.74291e-09	4.07443	2.94629	1.69736e-07
gene	ENSDARG00000003380	-2.89603	0.982959	36.1772	1.80167e-09	-0.368753	2.28363	1.74876e-07
gene	ENSDARG00000098349	-1.37968	2.73831	36.1519	1.82521e-09	1.94645	3.18961	1.76574e-07
gene	ENSDARG00000098537	-0.996285	4.26745	36.1095	1.86532e-09	3.44311	4.27116	1.79859e-07
gene	ENSDARG00000015559	1.02404	3.39358	35.8075	2.17804e-09	4.01721	2.85598	2.09321e-07
gene	ENSDARG00000034187	-1.05971	4.78703	35.6109	2.40937e-09	4.25877	5.20401	2.30794e-07
gene	ENSDARG00000062909	-1.21622	2.98722	35.5328	2.50793e-09	2.2346	3.27662	2.3945e-07
gene	ENSDARG00000044776	-3.58874	-0.214292	35.4493	2.61776e-09	-2.06616	0.953808	2.49123e-07
gene	ENSDARG00000075881	0.97348	4.42276	35.22	2.94489e-09	5.21307	4.10443	2.79344e-07
gene	ENSDARG00000003527	0.982273	4.43662	35.1738	3.01555e-09	5.02724	3.92321	2.85121e-07
gene	ENSDARG00000056690	0.966349	4.13769	35.1641	3.03061e-09	4.39197	3.273	2.85621e-07
gene	ENSDARG00000063371	-1.28082	2.86544	35.1561	3.0431e-09	2.0529	3.19249	2.85876e-07
gene	ENSDARG00000096528	-1.30446	2.80277	35.0556	3.20429e-09	2.13706	3.28755	3.00053e-07
gene	ENSDARG00000040864	-1.05226	4.78098	35.0427	3.22556e-09	4.18787	5.11099	3.0108e-07
gene	ENSDARG00000040433	7.48062	-0.903177	35.0307	3.24545e-09	-0.274967	-4.0452	3.01972e-07
gene	ENSDARG00000075046	-1.29791	6.61402	34.9762	3.33761e-09	6.11	7.25378	3.09561e-07
gene	ENSDARG00000069808	1.00984	3.36133	34.9659	3.35536e-09	4.14999	2.98107	3.10222e-07
gene	ENSDARG00000070074	-1.02793	3.35122	34.876	3.5139e-09	2.9082	3.76825	3.23855e-07
gene	ENSDARG00000104068	-1.2336	5.68141	34.8309	3.59618e-09	5.06648	6.15691	3.29657e-07
gene	ENSDARG00000017165	-1.75809	2.24424	34.8292	3.59942e-09	1.2065	2.78234	3.29657e-07
gene	ENSDARG00000009136	-0.925387	3.89255	34.8101	3.63476e-09	3.77883	4.52768	3.31854e-07
gene	ENSDARG00000098368	-1.18591	7.9536	34.7445	3.75938e-09	7.35815	8.3977	3.42162e-07
gene	ENSDARG00000095059	2.35065	1.54464	34.6896	3.86701e-09	2.75611	0.339805	3.49779e-07
gene	ENSDARG00000086847	-7.53693	-0.971307	34.6935	3.85926e-09	-3.869	-0.37343	3.49779e-07
gene	ENSDARG00000062096	1.15895	5.29371	34.6727	3.90073e-09	5.8853	4.60899	3.5174e-07
gene	ENSDARG00000062402	0.969099	3.49306	34.5556	4.14242e-09	4.29132	3.11775	3.72384e-07
gene	ENSDARG00000001015	-0.952727	3.73947	34.5053	4.25091e-09	3.22318	4.0275	3.80965e-07
gene	ENSDARG00000063068	-0.936404	3.95763	34.266	4.80701e-09	3.46477	4.28708	4.29485e-07
gene	ENSDARG00000003989	-3.07769	0.766091	34.2582	4.82626e-09	-1.18856	1.56449	4.2989e-07
gene	ENSDARG00000062059	-3.20397	0.34432	34.1568	5.08451e-09	-1.41885	1.40553	4.51517e-07
gene	ENSDARG00000053381	1.24448	2.79871	34.0196	5.45589e-09	3.87193	2.52133	4.83028e-07
gene	ENSDARG00000101469	-3.44197	-0.218809	33.9432	5.67458e-09	-1.94045	0.994132	5.00871e-07
gene	ENSDARG00000097917	7.83795	-1.32579	33.9205	5.74113e-09	0.051506	-4.0452	5.0522e-07
gene	ENSDARG00000101388	-3.34951	0.128288	33.9085	5.77658e-09	-1.78878	1.10029	5.06813e-07
gene	ENSDARG00000020708	-7.93156	-1.37139	33.7233	6.35346e-09	-3.869	-0.0294777	5.55756e-07
gene	ENSDARG00000114424	-3.73643	-0.425177	33.6594	6.56563e-09	-2.39486	0.671922	5.72601e-07
gene	ENSDARG00000070038	4.75517	-0.567404	33.5496	6.94699e-09	0.14291	-3.46021	6.04057e-07
gene	ENSDARG00000070426	-1.4236	2.57295	33.2637	8.04691e-09	1.89019	3.20998	6.97622e-07
gene	ENSDARG00000007753	-2.69674	1.24341	33.1934	8.34332e-09	-0.656075	1.75999	7.21179e-07
gene	ENSDARG00000078619	-0.970796	3.47108	33.0569	8.94991e-09	3.02922	3.84477	7.71329e-07
gene	ENSDARG00000096562	-0.901011	4.0595	33.0319	9.06579e-09	3.96446	4.73913	7.79018e-07
gene	ENSDARG00000046087	0.907923	4.08509	33.0095	9.17081e-09	4.75981	3.73745	7.85731e-07
gene	ENSDARG00000090654	-1.22799	5.92221	32.9981	9.22493e-09	5.40843	6.47736	7.88057e-07
gene	ENSDARG00000035322	3.38123	0.461898	32.9852	9.28617e-09	0.978502	-2.13231	7.90976e-07
gene	ENSDARG00000097839	-3.87871	0.298771	32.8616	9.8958e-09	-2.70592	0.284098	8.40453e-07
gene	ENSDARG00000097180	3.56079	-0.316038	32.8532	9.93894e-09	0.868025	-2.39103	8.4167e-07
gene	ENSDARG00000004861	3.6816	-0.274752	32.8258	1.00799e-08	0.695707	-2.58511	8.5114e-07
gene	ENSDARG00000063416	1.11946	5.27501	32.7865	1.02856e-08	6.03085	4.77532	8.66004e-07
gene	ENSDARG00000019438	-0.988576	4.63338	32.521	1.17909e-08	3.96319	4.81232	9.89897e-07
gene	ENSDARG00000042210	-0.962663	3.44371	32.5063	1.18808e-08	3.08551	3.90224	9.9458e-07
gene	ENSDARG00000098237	-0.916642	4.17463	32.4429	1.22747e-08	3.74165	4.49093	1.02462e-06
gene	ENSDARG00000061201	0.91146	3.76762	32.3201	1.30756e-08	4.25066	3.22837	1.08836e-06
gene	ENSDARG00000037633	1.214	5.90371	32.2869	1.33006e-08	6.42872	5.10286	1.10395e-06
gene	ENSDARG00000098208	0.898018	3.86955	32.182	1.40387e-08	4.46374	3.42359	1.16191e-06
gene	ENSDARG00000026704	-7.98972	-1.48257	32.1327	1.43993e-08	-3.869	0.110184	1.18839e-06
gene	ENSDARG00000091381	3.38066	0.0749728	31.9901	1.54959e-08	0.935354	-2.21129	1.27529e-06
gene	ENSDARG00000094556	2.87641	0.539871	31.8448	1.66998e-08	2.02553	-0.827476	1.37051e-06
gene	ENSDARG00000078088	-2.54702	1.23418	31.814	1.69667e-08	-0.185948	2.10389	1.38851e-06
gene	ENSDARG00000056331	0.992204	3.29243	31.7458	1.75732e-08	3.91316	2.77302	1.43413e-06
gene	ENSDARG00000076891	1.04469	4.99375	31.7118	1.78828e-08	5.46104	4.28844	1.45533e-06
gene	ENSDARG00000044528	1.07063	5.13649	31.6815	1.81642e-08	5.85502	4.63845	1.4715e-06
gene	ENSDARG00000069850	0.89833	4.15045	31.6796	1.81822e-08	4.71651	3.6872	1.4715e-06
gene	ENSDARG00000014624	-3.18346	0.459342	31.5197	1.97423e-08	-1.66407	1.07436	1.59334e-06
gene	ENSDARG00000068264	-2.1432	1.76194	31.4882	2.00651e-08	0.169974	2.10289	1.61494e-06
gene	ENSDARG00000057121	-1.71085	2.18555	31.2587	2.25836e-08	1.11829	2.69919	1.81264e-06
gene	ENSDARG00000088293	-1.59374	2.28424	31.2495	2.26907e-08	1.60492	3.021	1.81625e-06
gene	ENSDARG00000074169	-0.894987	4.15038	30.9644	2.62798e-08	3.6907	4.42393	2.09779e-06
gene	ENSDARG00000102195	-0.988697	4.77549	30.9453	2.65407e-08	4.1868	5.03251	2.11284e-06
gene	ENSDARG00000061691	-2.88916	0.888212	30.9108	2.70158e-08	-1.15649	1.39932	2.14482e-06
gene	ENSDARG00000102716	-2.46035	1.2687	30.8097	2.84612e-08	-0.025921	2.20633	2.25345e-06
gene	ENSDARG00000113971	-3.40385	-0.145962	30.802	2.8574e-08	-2.15901	0.651985	2.25626e-06
gene	ENSDARG00000079393	-2.98728	0.566854	30.7835	2.88483e-08	-1.31738	1.35605	2.27179e-06
gene	ENSDARG00000113678	1.34646	2.5648	30.7225	2.97692e-08	3.52354	2.06	2.338e-06
gene	ENSDARG00000055412	0.961296	3.3323	30.5283	3.29031e-08	3.93953	2.82779	2.5772e-06
gene	ENSDARG00000087844	-0.893827	4.26773	30.379	3.55353e-08	3.866	4.61906	2.76854e-06
gene	ENSDARG00000067824	-1.00797	4.93466	30.3798	3.55214e-08	4.46846	5.32625	2.76854e-06
gene	ENSDARG00000068708	0.885199	4.06123	30.3735	3.56368e-08	4.3977	3.40078	2.76906e-06
gene	ENSDARG00000094730	-0.939984	4.54429	30.3607	3.58718e-08	3.91726	4.67647	2.77992e-06
gene	ENSDARG00000112702	0.932271	3.62757	30.3393	3.62697e-08	3.69872	2.63867	2.80332e-06
gene	ENSDARG00000099056	-2.63075	1.30282	30.3111	3.68023e-08	-0.9807	1.3088	2.83698e-06
gene	ENSDARG00000041171	-0.0918725	14.8123	30.1506	3.99763e-08	14.6807	14.6348	3.07354e-06
gene	ENSDARG00000060127	0.8942	4.434	30.1314	4.03735e-08	5.43535	4.37628	3.09594e-06
gene	ENSDARG00000009014	-5.39447	-1.03752	30.0427	4.22627e-08	-3.54974	-0.182692	3.23232e-06
gene	ENSDARG00000098515	-1.91493	1.86629	30.0292	4.25595e-08	0.94105	2.67322	3.24653e-06
gene	ENSDARG00000103618	2.55795	1.07881	29.9962	4.32889e-08	2.2187	-0.442993	3.29356e-06
gene	ENSDARG00000079199	1.78311	2.00092	29.9405	4.45502e-08	3.01162	1.11721	3.37268e-06
gene	ENSDARG00000093058	1.19314	6.29607	29.9401	4.45596e-08	6.93996	5.65814	3.37268e-06
gene	ENSDARG00000115416	-7.42116	-1.23955	29.8229	4.73371e-08	-3.869	-0.496513	3.57365e-06
gene	ENSDARG00000098122	1.84239	1.93969	29.746	4.92525e-08	2.83135	0.894955	3.70866e-06
gene	ENSDARG00000100302	-2.5628	0.994305	29.7142	5.00664e-08	-0.169193	2.17438	3.76026e-06
gene	ENSDARG00000056791	-5.46146	-1.13551	29.6265	5.23829e-08	-3.54387	-0.140908	3.92415e-06
gene	ENSDARG00000099961	1.28559	2.63501	29.6069	5.29151e-08	3.41052	2.0247	3.95388e-06
gene	ENSDARG00000053279	-3.85777	0.401294	29.4555	5.72156e-08	-2.87898	0.0248118	4.26431e-06
gene	ENSDARG00000045567	-0.860877	4.16754	29.3932	5.90851e-08	3.99086	4.70942	4.39244e-06
gene	ENSDARG00000010752	-1.1858	2.81871	29.3457	6.05513e-08	2.16134	3.20242	4.49001e-06
gene	ENSDARG00000017984	5.90634	-1.45761	29.2271	6.43738e-08	0.4015	-3.72391	4.75233e-06
gene	ENSDARG00000008840	1.01208	3.12792	29.2258	6.44141e-08	3.7082	2.58314	4.75233e-06
gene	ENSDARG00000089076	-0.911162	4.51751	29.2131	6.48407e-08	4.04652	4.81488	4.77175e-06
gene	ENSDARG00000078917	2.12512	1.61543	29.152	6.69149e-08	2.41066	0.204115	4.91203e-06
gene	ENSDARG00000042188	-1.54944	2.30922	28.9406	7.46336e-08	1.28339	2.67898	5.4649e-06
gene	ENSDARG00000056267	-0.944676	4.74068	28.9078	7.59063e-08	4.29445	5.08519	5.53037e-06
gene	ENSDARG00000116713	-1.88675	1.86714	28.91	7.58191e-08	0.86188	2.55881	5.53037e-06
gene	ENSDARG00000076622	-0.912806	3.48884	28.6513	8.66563e-08	2.88151	3.66352	6.29788e-06
gene	ENSDARG00000054583	-1.99603	1.93336	28.5931	8.92984e-08	-0.118947	1.6327	6.4738e-06
gene	ENSDARG00000068624	-2.1739	1.54263	28.4725	9.50366e-08	0.177483	2.10987	6.87274e-06
gene	ENSDARG00000044938	2.1508	1.53564	28.4398	9.66559e-08	2.39774	0.189861	6.97259e-06
gene	ENSDARG00000100524	-1.0343	3.04588	28.2647	1.05808e-07	2.6063	3.46421	7.61398e-06
gene	ENSDARG00000095179	2.79089	0.874464	28.2562	1.06276e-07	1.33163	-1.39618	7.62889e-06
gene	ENSDARG00000092003	-2.61203	1.1401	28.2327	1.07573e-07	-0.957611	1.35975	7.68422e-06
gene	ENSDARG00000035253	-4.60659	-0.924828	28.2348	1.07455e-07	-3.27776	-0.108018	7.68422e-06
gene	ENSDARG00000069133	-2.98444	-0.146944	28.1938	1.09755e-07	-1.57463	0.97714	7.82096e-06
gene	ENSDARG00000093549	0.853303	4.12691	28.117	1.14201e-07	4.46779	3.48983	8.11801e-06
gene	ENSDARG00000074301	-0.955742	4.86615	27.9755	1.22862e-07	4.31345	5.1214	8.71245e-06
gene	ENSDARG00000069135	1.38233	2.46923	27.9622	1.23712e-07	3.08036	1.569	8.75148e-06
gene	ENSDARG00000089413	2.26264	1.33325	27.9499	1.24497e-07	2.46781	0.0753601	8.78573e-06
gene	ENSDARG00000062696	-0.997811	3.14784	27.804	1.34246e-07	2.50729	3.37395	9.45089e-06
gene	ENSDARG00000035610	0.864559	3.47021	27.7907	1.35174e-07	4.31007	3.29971	9.49339e-06
gene	ENSDARG00000033201	4.49741	-1.16643	27.7464	1.38305e-07	0.368147	-3.23843	9.68997e-06
gene	ENSDARG00000097653	-5.83018	-1.4916	27.6601	1.44617e-07	-3.54387	0.295182	1.01079e-05
gene	ENSDARG00000062056	-1.11402	2.86504	27.583	1.50499e-07	2.36666	3.30898	1.0494e-05
gene	ENSDARG00000076221	-3.14293	0.473651	27.5737	1.51222e-07	-2.04687	0.631818	1.05193e-05
gene	ENSDARG00000094537	-3.86674	-0.625097	27.532	1.54517e-07	-2.87898	0.0220682	1.0723e-05
gene	ENSDARG00000095904	0.964862	4.97648	27.5057	1.56635e-07	5.55108	4.46335	1.08442e-05
gene	ENSDARG00000097630	0.965532	3.16543	27.376	1.67495e-07	3.72848	2.63528	1.15414e-05
gene	ENSDARG00000078473	-0.835894	4.16317	27.3793	1.67215e-07	3.86441	4.55681	1.15414e-05
gene	ENSDARG00000032639	3.66149	-0.781298	27.3404	1.70611e-07	0.459917	-2.72202	1.17262e-05
gene	ENSDARG00000030110	-3.71405	-0.670001	27.3362	1.70981e-07	-2.70434	0.202398	1.17262e-05
gene	ENSDARG00000018984	1.40036	2.44174	27.3308	1.71456e-07	2.91955	1.40234	1.17313e-05
gene	ENSDARG00000007813	0.984586	3.15284	27.1945	1.83986e-07	3.5086	2.38874	1.25592e-05
gene	ENSDARG00000041644	1.98249	1.61684	27.0995	1.93251e-07	2.83952	0.732276	1.31609e-05
gene	ENSDARG00000019312	-0.855322	3.61134	27.0424	1.99046e-07	3.14678	3.84355	1.3524e-05
gene	ENSDARG00000005179	1.55738	2.18641	26.9428	2.09567e-07	2.92133	1.27714	1.42058e-05
gene	ENSDARG00000024602	2.74688	0.343969	26.9342	2.10501e-07	1.46846	-1.23936	1.42361e-05
gene	ENSDARG00000095553	-0.51341	11.7315	26.8972	2.14569e-07	11.6028	11.9813	1.44777e-05
gene	ENSDARG00000105018	-0.972025	8.47268	26.8713	2.1747e-07	7.93482	8.77641	1.46396e-05
gene	ENSDARG00000099395	-0.98677	3.04075	26.8565	2.19136e-07	2.94648	3.78023	1.47179e-05
gene	ENSDARG00000089901	-2.48801	1.00304	26.845	2.20446e-07	-0.451682	1.78438	1.47719e-05
gene	ENSDARG00000010008	-0.563149	11.3703	26.8345	2.21645e-07	11.168	11.5823	1.48183e-05
gene	ENSDARG00000062077	-0.895654	3.42913	26.8129	2.24138e-07	2.82551	3.56253	1.49507e-05
gene	ENSDARG00000103311	-3.15728	-0.516945	26.7217	2.34972e-07	-1.9669	0.662369	1.56377e-05
gene	ENSDARG00000074185	-4.24892	0.499743	26.6689	2.41478e-07	-3.28351	-0.455931	1.60341e-05
gene	ENSDARG00000088595	-2.9457	0.0774704	26.6471	2.44219e-07	-1.68701	0.859458	1.61794e-05
gene	ENSDARG00000093323	-2.11457	1.48115	26.4927	2.64541e-07	0.261803	2.19183	1.7486e-05
gene	ENSDARG00000027183	-1.1091	2.8541	26.3675	2.82247e-07	2.151	3.14826	1.86143e-05
gene	ENSDARG00000100479	-2.52215	0.908975	26.311	2.90627e-07	-0.612045	1.63524	1.91238e-05
gene	ENSDARG00000073789	-2.00638	1.54813	26.1936	3.08837e-07	0.723128	2.57575	2.02764e-05
gene	ENSDARG00000103590	-3.23256	-0.534481	26.0878	3.26242e-07	-2.18888	0.458284	2.1371e-05
gene	ENSDARG00000074331	-1.00118	5.28195	26.062	3.30623e-07	4.7699	5.59746	2.16096e-05
gene	ENSDARG00000011615	-3.29778	-0.569665	25.9219	3.55515e-07	-2.28218	0.420588	2.31846e-05
gene	ENSDARG00000099197	-6.89647	-0.989011	25.916	3.56597e-07	-3.869	-0.961977	2.32035e-05
gene	ENSDARG00000020834	0.996134	3.01906	25.8859	3.62212e-07	3.62686	2.49492	2.35164e-05
gene	ENSDARG00000089444	-1.39671	2.41958	25.8764	3.63992e-07	1.41143	2.58909	2.35796e-05
gene	ENSDARG00000101085	0.882131	3.33567	25.8677	3.65631e-07	3.87815	2.87376	2.36334e-05
gene	ENSDARG00000100003	0.81513	4.18776	25.8292	3.73003e-07	4.63754	3.70707	2.40567e-05
gene	ENSDARG00000068323	2.19916	1.20141	25.7696	3.84697e-07	2.66198	0.399007	2.47562e-05
gene	ENSDARG00000070583	1.10731	6.44437	25.6862	4.01697e-07	6.98888	5.75631	2.57934e-05
gene	ENSDARG00000101634	2.77261	0.220729	25.6484	4.09643e-07	1.14404	-1.52144	2.62069e-05
gene	ENSDARG00000097871	-0.911923	3.21674	25.647	4.09932e-07	2.93812	3.67645	2.62069e-05
gene	ENSDARG00000004227	-2.78909	0.544749	25.5306	4.35423e-07	-1.46679	0.961531	2.77758e-05
gene	ENSDARG00000059950	-1.99949	1.53671	25.4827	4.46357e-07	0.610445	2.41459	2.84112e-05
gene	ENSDARG00000037429	-2.5217	0.58582	25.4267	4.59508e-07	-0.477531	1.79527	2.91848e-05
gene	ENSDARG00000104178	0.880586	4.71751	25.3791	4.70993e-07	5.13727	4.11059	2.98493e-05
gene	ENSDARG00000029501	-0.885598	3.28157	25.364	4.74705e-07	3.01236	3.75512	3.00194e-05
gene	ENSDARG00000074328	-0.947796	3.1596	25.3259	4.84166e-07	2.55445	3.3707	3.05516e-05
gene	ENSDARG00000041925	-0.246935	13.5967	25.3008	4.90509e-07	13.4088	13.5094	3.08851e-05
gene	ENSDARG00000068628	-0.807935	3.84447	25.2369	5.07021e-07	3.36542	4.02568	3.18562e-05
gene	ENSDARG00000009982	0.797474	3.78766	25.2309	5.08601e-07	4.3403	3.40703	3.18869e-05
gene	ENSDARG00000069472	1.05732	7.40869	25.109	5.41783e-07	8.42548	7.27402	3.38434e-05
gene	ENSDARG00000101127	0.997978	5.38751	25.1078	5.42124e-07	6.01152	4.87223	3.38434e-05
gene	ENSDARG00000035427	0.790467	3.85258	25.1024	5.43664e-07	4.41716	3.51231	3.38672e-05
gene	ENSDARG00000061042	2.5499	0.716282	25.0833	5.49069e-07	1.58587	-0.957491	3.4131e-05
gene	ENSDARG00000099003	2.33599	1.05645	25.0738	5.51777e-07	2.00439	-0.371494	3.42266e-05
gene	ENSDARG00000034210	-2.3866	1.04695	25.0435	5.60516e-07	-0.493691	1.68725	3.4695e-05
gene	ENSDARG00000029259	1.22245	2.5624	25.0125	5.69612e-07	3.32305	2.00303	3.51835e-05
gene	ENSDARG00000078441	-0.797006	4.13634	24.9863	5.77391e-07	3.84779	4.50323	3.55887e-05
gene	ENSDARG00000015425	-4.07735	-0.934189	24.9713	5.81887e-07	-3.05242	-0.141496	3.57903e-05
gene	ENSDARG00000104040	-3.45483	-0.672798	24.9649	5.83828e-07	-2.53502	0.163377	3.58343e-05
gene	ENSDARG00000096701	-0.8128	3.95896	24.9565	5.86394e-07	3.2778	3.90919	3.59163e-05
gene	ENSDARG00000009336	1.12997	2.69086	24.8336	6.24989e-07	3.53858	2.29096	3.82001e-05
gene	ENSDARG00000028367	-3.64592	-1.0809	24.76	6.49298e-07	-2.4105	0.616227	3.96031e-05
gene	ENSDARG00000111106	3.99967	-1.09919	24.7004	6.69712e-07	0.267315	-3.04637	4.07632e-05
gene	ENSDARG00000002745	-1.07756	6.31116	24.6111	7.01474e-07	6.1911	7.13138	4.26076e-05
gene	ENSDARG00000101919	-3.45423	1.17232	24.5095	7.39428e-07	-2.86799	-0.301499	4.48197e-05
gene	ENSDARG00000007129	-0.779976	3.76684	24.453	7.61437e-07	3.68292	4.31827	4.60582e-05
gene	ENSDARG00000105161	3.13719	-0.305852	24.4187	7.75129e-07	0.370835	-2.43905	4.67896e-05
gene	ENSDARG00000037639	1.28742	2.39551	24.3837	7.89326e-07	3.56704	2.1986	4.75484e-05
gene	ENSDARG00000102215	2.85671	-0.249834	24.2714	8.36725e-07	0.782696	-1.88994	5.00938e-05
gene	ENSDARG00000030694	0.789327	3.71916	24.2716	8.36652e-07	4.20977	3.29306	5.00938e-05
gene	ENSDARG00000098754	-4.32998	-1.07823	24.2742	8.35524e-07	-3.21508	-0.190979	5.00938e-05
gene	ENSDARG00000095147	-1.84961	1.64606	24.2577	8.42716e-07	0.938479	2.67289	5.03493e-05
gene	ENSDARG00000058732	-2.1195	1.49883	24.2068	8.65258e-07	-0.321041	1.50222	5.15906e-05
gene	ENSDARG00000045932	0.886634	4.88168	24.1783	8.78146e-07	5.37373	4.36444	5.22524e-05
gene	ENSDARG00000101251	-0.890488	3.19673	24.1132	9.08365e-07	2.92231	3.65038	5.39407e-05
gene	ENSDARG00000086849	-2.49405	0.692024	24.0951	9.16911e-07	-0.739046	1.48469	5.43377e-05
gene	ENSDARG00000012019	-0.784575	4.19388	24.0765	9.25846e-07	3.94067	4.58017	5.47561e-05
gene	ENSDARG00000041092	-2.66118	0.196071	24.0652	9.3126e-07	-1.28025	1.04572	5.49651e-05
gene	ENSDARG00000071558	-0.889683	3.2861	24.0299	9.48497e-07	2.63845	3.35263	5.58696e-05
gene	ENSDARG00000092488	-0.824315	3.49732	24.0171	9.54858e-07	3.05975	3.73248	5.60805e-05
gene	ENSDARG00000089227	-1.55654	2.03335	24.0149	9.55918e-07	1.51744	2.91578	5.60805e-05
gene	ENSDARG00000087599	-2.3272	1.19511	24.0026	9.62063e-07	-0.690487	1.33967	5.62152e-05
gene	ENSDARG00000112541	-3.03632	-0.362063	24.003	9.61842e-07	-2.11327	0.378957	5.62152e-05
gene	ENSDARG00000070721	-0.825971	3.40904	23.9915	9.67617e-07	3.20518	3.886	5.6427e-05
gene	ENSDARG00000069878	-0.987105	2.94758	23.9418	9.92908e-07	2.60075	3.4493	5.77864e-05
gene	ENSDARG00000025108	2.96672	-0.395824	23.9287	9.99708e-07	0.620673	-2.13979	5.80666e-05
gene	ENSDARG00000116723	1.18785	2.56454	23.9184	1.00509e-06	3.37579	2.10141	5.8263e-05
gene	ENSDARG00000095592	6.96227	-1.34391	23.8722	1.0295e-06	-0.751745	-4.0452	5.95599e-05
gene	ENSDARG00000095654	-6.88093	-1.22705	23.8565	1.03789e-06	-3.869	-0.95511	5.99268e-05
gene	ENSDARG00000110496	2.50906	0.393433	23.8314	1.05151e-06	1.56716	-0.904308	6.05934e-05
gene	ENSDARG00000097583	0.801886	4.4734	23.7826	1.07851e-06	5.29547	4.33349	6.20273e-05
gene	ENSDARG00000102796	-1.60652	2.02358	23.7518	1.09595e-06	0.961671	2.40487	6.2906e-05
gene	ENSDARG00000103735	-1.18842	2.58707	23.7431	1.10089e-06	2.0372	3.07433	6.30657e-05
gene	ENSDARG00000023820	-0.809786	4.45294	23.6703	1.14334e-06	4.04491	4.7058	6.53698e-05
gene	ENSDARG00000007975	2.58173	0.0715556	23.6503	1.15531e-06	1.33609	-1.24108	6.59247e-05
gene	ENSDARG00000029482	2.02088	1.46325	23.6335	1.16539e-06	2.13253	0.0182248	6.63702e-05
gene	ENSDARG00000005172	-0.804772	4.37711	23.6135	1.17759e-06	3.82439	4.48896	6.69348e-05
gene	ENSDARG00000040352	-0.868233	3.24753	23.5486	1.21798e-06	2.92891	3.6099	6.90959e-05
gene	ENSDARG00000051912	2.48551	0.604754	23.5184	1.23722e-06	1.52591	-0.957491	7.00516e-05
gene	ENSDARG00000097317	-2.25183	1.04094	23.4276	1.29705e-06	-0.138968	1.91032	7.3297e-05
gene	ENSDARG00000043134	-0.770206	4.00133	23.3671	1.33851e-06	3.64185	4.25995	7.54941e-05
gene	ENSDARG00000073766	-0.913514	5.09867	23.3611	1.3427e-06	4.60228	5.37899	7.55843e-05
gene	ENSDARG00000090600	-2.51454	0.458842	23.3394	1.35786e-06	-0.885916	1.35605	7.6291e-05
gene	ENSDARG00000022518	-4.05518	-0.224889	23.3319	1.36317e-06	-3.27776	-0.609806	7.64422e-05
gene	ENSDARG00000067859	4.70924	-1.37895	23.2668	1.41015e-06	0.0567633	-3.45893	7.8925e-05
gene	ENSDARG00000031496	0.933719	3.04027	23.2501	1.42245e-06	3.63774	2.54149	7.94614e-05
gene	ENSDARG00000019585	-7.20989	-1.56002	23.2008	1.45939e-06	-3.869	-0.692085	8.13692e-05
gene	ENSDARG00000002016	0.931399	3.04788	23.1825	1.47336e-06	3.59466	2.53416	8.19916e-05
gene	ENSDARG00000039181	-1.3	2.35979	23.0866	1.54868e-06	1.9435	3.07859	8.60193e-05
gene	ENSDARG00000093091	2.69465	-0.370184	23.0132	1.60891e-06	0.995459	-1.57896	8.91954e-05
gene	ENSDARG00000040942	-0.898899	3.15174	23.0025	1.61791e-06	2.66566	3.42455	8.95244e-05
gene	ENSDARG00000040566	1.33546	2.30998	22.978	1.63868e-06	3.0833	1.64394	9.05022e-05
gene	ENSDARG00000045554	-3.29647	-0.909727	22.9706	1.64498e-06	-2.27708	0.441162	9.0679e-05
gene	ENSDARG00000073957	-0.831099	3.40361	22.887	1.7181e-06	2.85535	3.53338	9.45312e-05
gene	ENSDARG00000015531	2.32769	0.782799	22.8789	1.72533e-06	1.92049	-0.457933	9.45729e-05
gene	ENSDARG00000042159	1.80221	1.67203	22.88	1.72436e-06	2.47016	0.603682	9.45729e-05
gene	ENSDARG00000096618	-7.37511	-1.67528	22.865	1.73792e-06	-3.869	-0.562385	9.50844e-05
gene	ENSDARG00000045929	-0.862774	8.71776	22.8347	1.76548e-06	8.5344	9.24697	9.64115e-05
gene	ENSDARG00000014239	-0.748377	4.08935	22.7622	1.83336e-06	4.07598	4.67788	9.9932e-05
gene	ENSDARG00000014655	1.44665	2.12336	22.6788	1.9147e-06	3.06281	1.49522	0.000103977
gene	ENSDARG00000095536	-3.40563	-0.664172	22.68	1.91346e-06	-2.6681	-0.0482305	0.000103977
gene	ENSDARG00000093303	-2.00712	1.39761	22.6686	1.92483e-06	0.1912	2.03465	0.000104334
gene	ENSDARG00000103230	-7.10365	-1.53727	22.595	2.00001e-06	-3.869	-0.75767	0.000108208
gene	ENSDARG00000008372	-0.77808	3.61438	22.5545	2.0427e-06	3.23181	3.86567	0.000110115
gene	ENSDARG00000005913	-3.20905	-0.909735	22.5508	2.04656e-06	-2.15901	0.499879	0.000110115
gene	ENSDARG00000040156	-3.41436	-0.676969	22.5523	2.04502e-06	-2.70054	-0.0519111	0.000110115
gene	ENSDARG00000070702	-0.980804	2.88396	22.5388	2.05937e-06	2.65829	3.47928	0.0001106
gene	ENSDARG00000101689	2.97068	-0.649625	22.465	2.14007e-06	0.608923	-2.16917	0.000114629
gene	ENSDARG00000102353	-0.770122	3.61701	22.4631	2.14222e-06	3.33759	3.96901	0.000114629
gene	ENSDARG00000009031	-0.791748	4.499	22.3993	2.21459e-06	4.14141	4.79295	0.000118284
gene	ENSDARG00000007098	-0.836834	8.85059	22.371	2.2474e-06	8.55685	9.25219	0.000119818
gene	ENSDARG00000090228	-0.858714	4.95867	22.3454	2.27762e-06	4.99293	5.71951	0.000121207
gene	ENSDARG00000036870	-0.80129	3.41081	22.3329	2.29248e-06	3.14061	3.79716	0.000121777
gene	ENSDARG00000035859	-2.8212	0.0255793	22.2777	2.35928e-06	-1.95246	0.383322	0.000125098
gene	ENSDARG00000093349	-3.22659	-0.87703	22.2351	2.41221e-06	-2.29233	0.309848	0.000127672
gene	ENSDARG00000103594	0.819827	4.75099	22.2197	2.43166e-06	5.52354	4.58094	0.000128469
gene	ENSDARG00000090708	-4.69677	-1.43724	22.1995	2.45741e-06	-3.27776	-0.0286704	0.000129595
gene	ENSDARG00000079618	-5.14679	-1.39713	22.1782	2.48483e-06	-3.54974	-0.429854	0.000130805
gene	ENSDARG00000079891	0.744606	3.68785	22.1594	2.50922e-06	4.40679	3.52079	0.000131851
gene	ENSDARG00000099371	-0.769887	4.40001	22.0903	2.60115e-06	4.17215	4.8194	0.000136437
gene	ENSDARG00000018898	-0.819716	3.31491	22.0383	2.67265e-06	3.02605	3.6924	0.000139936
gene	ENSDARG00000063252	-0.745321	3.93573	21.9941	2.73489e-06	3.6102	4.20491	0.000142938
gene	ENSDARG00000098414	-0.745439	4.17403	21.9844	2.74876e-06	4.0158	4.62039	0.000143156
gene	ENSDARG00000033361	-0.931125	5.34387	21.9843	2.74885e-06	4.64721	5.43377	0.000143156
gene	ENSDARG00000090337	0.801079	4.63893	21.9249	2.83527e-06	5.16562	4.2317	0.000147394
gene	ENSDARG00000013670	-0.758727	3.64919	21.8627	2.92865e-06	3.31934	3.94684	0.000151977
gene	ENSDARG00000089564	0.836683	4.85485	21.84	2.96356e-06	5.35878	4.38589	0.000153517
gene	ENSDARG00000015657	1.30815	2.30907	21.8267	2.98411e-06	3.00591	1.57604	0.000154308
gene	ENSDARG00000011769	4.9071	-1.22586	21.735	3.13021e-06	-0.543536	-3.7226	0.000160808
gene	ENSDARG00000013973	0.8175	3.29489	21.7348	3.13061e-06	3.82729	2.8696	0.000160808
gene	ENSDARG00000017246	-0.355758	12.5767	21.734	3.13183e-06	12.5738	12.7903	0.000160808
gene	ENSDARG00000004763	-1.2902	2.29234	21.7409	3.12059e-06	2.08127	3.19146	0.000160808
gene	ENSDARG00000002607	-0.748647	3.90486	21.7265	3.14418e-06	3.41601	4.01861	0.000161159
gene	ENSDARG00000062510	-3.25661	-0.96694	21.72	3.15486e-06	-2.28726	0.345138	0.000161423
gene	ENSDARG00000079355	-2.00898	1.23001	21.7133	3.16581e-06	0.513635	2.34108	0.0001617
gene	ENSDARG00000076348	3.02146	-0.488251	21.7006	3.18697e-06	0.228885	-2.46014	0.000162213
gene	ENSDARG00000003444	-0.755037	4.31638	21.7036	3.18192e-06	4.05576	4.68646	0.000162213
gene	ENSDARG00000044753	-0.805023	3.34829	21.6942	3.1976e-06	3.0417	3.71988	0.000162471
gene	ENSDARG00000074554	-0.805062	3.39893	21.6841	3.21447e-06	2.94005	3.58508	0.000163045
gene	ENSDARG00000099568	0.75215	3.57918	21.657	3.26026e-06	4.2156	3.33027	0.000165081
gene	ENSDARG00000116625	2.10843	1.18644	21.6251	3.31488e-06	1.85837	-0.2898	0.000167455
gene	ENSDARG00000055630	-2.1645	0.978778	21.6196	3.32434e-06	0.0629393	1.93598	0.000167455
gene	ENSDARG00000088515	-3.09349	0.722072	21.6207	3.32255e-06	-2.54562	-0.124474	0.000167455
gene	ENSDARG00000040985	3.08818	-0.708493	21.5214	3.49902e-06	0.298533	-2.45901	0.000175951
gene	ENSDARG00000044281	-0.743862	3.74208	21.5113	3.51751e-06	3.4196	4.03633	0.000176395
gene	ENSDARG00000089831	-1.31456	2.28693	21.51	3.51994e-06	1.67729	2.8366	0.000176395
gene	ENSDARG00000087793	0.842258	3.18008	21.4026	3.72271e-06	3.73815	2.79164	0.000185975
gene	ENSDARG00000013317	-0.720893	4.05276	21.402	3.72383e-06	4.13046	4.70712	0.000185975
gene	ENSDARG00000102669	-1.54452	1.89665	21.3856	3.75587e-06	1.62313	2.92311	0.000187255
gene	ENSDARG00000015003	-0.794242	3.28424	21.3733	3.77992e-06	3.4235	4.02051	0.000188133
gene	ENSDARG00000090869	3.69026	-1.264	21.3508	3.8246e-06	0.524431	-2.72554	0.000190033
gene	ENSDARG00000090690	1.84709	1.52989	21.3065	3.91403e-06	2.28943	0.302615	0.000194146
gene	ENSDARG00000068876	0.839548	8.66308	21.2924	3.94285e-06	9.31368	8.34296	0.000195245
gene	ENSDARG00000078113	-0.844293	4.95338	21.2795	3.96949e-06	4.58385	5.29099	0.000196231
gene	ENSDARG00000014361	1.00683	2.77164	21.2662	3.99721e-06	3.48974	2.36566	0.000197268
gene	ENSDARG00000018904	0.755803	3.53911	21.2614	4.00712e-06	4.0788	3.19471	0.000197423
gene	ENSDARG00000102415	-0.623067	10.3778	21.1792	4.1829e-06	10.0413	10.5254	0.000205737
gene	ENSDARG00000097477	-2.7297	-0.437044	21.1515	4.24378e-06	-1.79037	0.513299	0.00020838
gene	ENSDARG00000096233	1.24937	2.4155	21.127	4.29831e-06	2.72947	1.37669	0.000210351
gene	ENSDARG00000020475	-0.959888	5.71929	21.1292	4.29341e-06	5.20204	6.01327	0.000210351
gene	ENSDARG00000109770	2.31765	0.457987	21.0803	4.4044e-06	1.59425	-0.720062	0.000215182
gene	ENSDARG00000054814	-1.11961	2.55241	21.07	4.42816e-06	2.2697	3.22626	0.000215809
gene	ENSDARG00000094608	-2.56863	-0.0183015	21.0683	4.432e-06	-1.50972	0.695015	0.000215809
gene	ENSDARG00000019341	7.43927	-1.83853	20.9848	4.62948e-06	-0.316037	-4.0452	0.00022505
gene	ENSDARG00000100690	-2.63504	-0.176393	20.908	4.81887e-06	-1.70181	0.534514	0.000233867
gene	ENSDARG00000054331	4.85493	-1.24916	20.8878	4.86985e-06	-0.569844	-3.72391	0.00023595
gene	ENSDARG00000028087	-0.819976	4.88408	20.8481	4.97198e-06	4.68757	5.37768	0.000240499
gene	ENSDARG00000100336	-0.889862	3.08556	20.8154	5.05748e-06	2.45798	3.19108	0.00024423
gene	ENSDARG00000043283	-0.823956	3.23772	20.7226	5.30866e-06	2.81022	3.47957	0.000255937
gene	ENSDARG00000076144	-0.736508	4.2967	20.6815	5.42387e-06	3.98037	4.58394	0.000261061
gene	ENSDARG00000114191	1.21707	2.3992	20.6474	5.52115e-06	3.02332	1.67487	0.000265306
gene	ENSDARG00000097696	-0.85949	5.11303	20.6124	5.6231e-06	4.65098	5.38048	0.000269761
gene	ENSDARG00000027744	0.725728	3.8029	20.6054	5.64375e-06	4.17849	3.31692	0.000269866
gene	ENSDARG00000074644	-4.8591	-1.61557	20.606	5.64196e-06	-3.27776	0.075895	0.000269866
gene	ENSDARG00000012040	-0.85814	5.12643	20.575	5.73412e-06	4.86278	5.58064	0.000273739
gene	ENSDARG00000090292	1.8062	1.4958	20.5352	5.85433e-06	2.435	0.547936	0.000279022
gene	ENSDARG00000012341	-2.81387	0.359018	20.5193	5.90329e-06	-2.16401	0.107821	0.000280897
gene	ENSDARG00000116863	-0.951331	5.76907	20.5077	5.93909e-06	5.19116	5.99409	0.000282141
gene	ENSDARG00000074908	2.02614	1.11674	20.5045	5.94905e-06	2.18253	0.0872418	0.000282155
gene	ENSDARG00000102424	-4.36061	-1.31294	20.4801	6.02529e-06	-3.27776	-0.339977	0.000285308
gene	ENSDARG00000032155	-0.790865	3.29319	20.4565	6.10005e-06	3.08274	3.73084	0.000287914
gene	ENSDARG00000062744	-2.36141	0.19709	20.4572	6.09803e-06	-0.874694	1.22374	0.000287914
gene	ENSDARG00000055854	-4.79815	-1.23695	20.4313	6.18095e-06	-3.54387	-0.71786	0.000291262
gene	ENSDARG00000091660	-0.747471	3.39252	20.3465	6.46127e-06	3.60385	4.16166	0.000303982
gene	ENSDARG00000028346	0.869179	5.24152	20.3243	6.53636e-06	6.05908	5.06728	0.00030702
gene	ENSDARG00000074136	-7.66731	-1.9499	20.3133	6.57437e-06	-3.869	-0.243298	0.000308309
gene	ENSDARG00000104524	7.11764	-1.74065	20.2417	6.82497e-06	-0.61344	-4.0452	0.000319549
gene	ENSDARG00000099291	-6.67843	-1.40905	20.2237	6.88957e-06	-3.869	-1.13641	0.000322057
gene	ENSDARG00000078494	3.08407	-0.735585	20.1951	6.99335e-06	0.125243	-2.58626	0.000326386
gene	ENSDARG00000037427	-1.87191	1.45424	20.1342	7.21928e-06	0.149904	1.81443	0.000336393
gene	ENSDARG00000079402	-2.14105	0.774707	20.0825	7.41712e-06	-0.000221458	1.92303	0.000345061
gene	ENSDARG00000054749	-3.02775	-0.622484	20.0692	7.46918e-06	-2.41568	-0.0459811	0.000346931
gene	ENSDARG00000075928	2.48131	0.791482	19.994	7.76845e-06	0.65662	-1.72213	0.000360259
gene	ENSDARG00000079145	1.45822	1.96089	19.9178	8.08435e-06	2.93673	1.32117	0.000374314
gene	ENSDARG00000027154	0.868143	3.03347	19.9003	8.15883e-06	3.54912	2.54016	0.000376569
gene	ENSDARG00000057479	-2.44592	0.217801	19.9018	8.15239e-06	-1.34809	0.74906	0.000376569
gene	ENSDARG00000099359	2.30905	0.382328	19.894	8.18589e-06	1.31931	-0.987374	0.000377222
gene	ENSDARG00000021140	-0.736093	9.27914	19.8652	8.30978e-06	8.8306	9.42237	0.000382328
gene	ENSDARG00000098523	2.56385	-0.569487	19.837	8.43356e-06	0.883671	-1.57801	0.000387413
gene	ENSDARG00000042345	1.157	2.43222	19.8267	8.47907e-06	3.25967	1.95096	0.000388892
gene	ENSDARG00000092846	1.95841	1.24294	19.8046	8.57768e-06	1.97903	-0.0363856	0.000392798
gene	ENSDARG00000024032	-2.66737	-0.407399	19.6416	9.34145e-06	-1.88996	0.308885	0.000427105
gene	ENSDARG00000077396	-0.695785	3.89547	19.6299	9.39869e-06	3.81215	4.33308	0.00042905
gene	ENSDARG00000044632	-2.05045	1.05453	19.5272	9.9175e-06	-0.107663	1.6919	0.000452027
gene	ENSDARG00000070597	2.53276	-0.366785	19.5154	9.97901e-06	0.696254	-1.72017	0.000454123
gene	ENSDARG00000012060	2.47213	-0.384491	19.5083	1.00163e-05	0.88726	-1.52006	0.000455112
gene	ENSDARG00000104850	-2.35583	-0.0744185	19.4965	1.00785e-05	-1.06455	0.977705	0.000457225
gene	ENSDARG00000099444	2.06941	1.11644	19.419	1.04958e-05	1.52162	-0.566489	0.000475417
gene	ENSDARG00000099672	-3.52627	-1.27108	19.4056	1.05695e-05	-2.5509	0.297515	0.000478015
gene	ENSDARG00000070601	-0.708203	3.79083	19.3765	1.07318e-05	3.36572	3.93585	0.000484605
gene	ENSDARG00000101049	-2.82816	-0.716304	19.3619	1.08143e-05	-2.06483	0.240531	0.000487576
gene	ENSDARG00000074680	3.59775	-1.1128	19.358	1.08366e-05	-0.101983	-3.04515	0.000487832
gene	ENSDARG00000100660	-1.61465	1.67687	19.342	1.09278e-05	1.20372	2.66234	0.000491178
gene	ENSDARG00000101274	3.11659	-0.632028	19.3144	1.10869e-05	-0.146977	-2.77908	0.000497564
gene	ENSDARG00000060512	-2.18872	0.651533	19.2838	1.1266e-05	-0.493538	1.44877	0.000504825
gene	ENSDARG00000076520	-0.702711	3.66364	19.2762	1.13106e-05	3.5224	4.08426	0.000506049
gene	ENSDARG00000093684	2.32264	0.0140301	19.2534	1.14467e-05	1.12365	-1.19083	0.000511358
gene	ENSDARG00000087688	-2.40617	0.376904	19.2498	1.14685e-05	-1.35648	0.673876	0.000511549
gene	ENSDARG00000052121	-6.90776	-1.68201	19.2274	1.16037e-05	-3.869	-0.909008	0.000516788
gene	ENSDARG00000101039	-1.59395	1.76007	19.1407	1.21428e-05	0.860075	2.26723	0.000539974
gene	ENSDARG00000075768	-0.839738	5.19812	19.0513	1.27252e-05	4.75967	5.46229	0.000565016
gene	ENSDARG00000025920	0.777366	3.25363	19.0171	1.29553e-05	3.74343	2.79522	0.000574358
gene	ENSDARG00000063375	-1.56825	1.74373	19.0115	1.29936e-05	1.16857	2.56916	0.000575184
gene	ENSDARG00000029480	-0.925444	7.28496	18.9595	1.33523e-05	6.94839	7.73488	0.000590169
gene	ENSDARG00000070543	-0.760431	3.31041	18.9214	1.36219e-05	3.05473	3.64982	0.000601176
gene	ENSDARG00000001559	-2.14881	0.919395	18.8978	1.3791e-05	-0.669836	1.18149	0.000607718
gene	ENSDARG00000052470	-0.935272	6.10656	18.8598	1.40684e-05	5.61697	6.41292	0.000619008
gene	ENSDARG00000020618	-0.685187	3.97035	18.846	1.41711e-05	3.75002	4.30452	0.000622589
gene	ENSDARG00000100896	2.45188	0.0375583	18.8047	1.44809e-05	0.626194	-1.71231	0.000635245
gene	ENSDARG00000071090	1.07988	2.51097	18.8006	1.4512e-05	3.27571	2.08395	0.000635658
gene	ENSDARG00000099465	-0.740112	3.32842	18.7621	1.48077e-05	3.30619	3.90022	0.000647638
gene	ENSDARG00000094414	-2.70972	-0.482483	18.7525	1.4883e-05	-2.0348	0.140573	0.000649958
gene	ENSDARG00000018553	-2.27151	0.0302946	18.6477	1.57236e-05	-0.94246	1.04738	0.000685644
gene	ENSDARG00000033138	0.724583	3.41508	18.638	1.58038e-05	4.00311	3.14675	0.000688112
gene	ENSDARG00000045989	-0.747316	4.67278	18.6295	1.58748e-05	4.23991	4.84732	0.000690175
gene	ENSDARG00000008329	-1.24423	2.23069	18.5559	1.64995e-05	1.79167	2.84175	0.000716268
gene	ENSDARG00000075748	1.98149	0.878951	18.5413	1.66266e-05	2.30622	0.270545	0.000720716
gene	ENSDARG00000071082	-0.893467	5.71133	18.4652	1.73039e-05	5.43218	6.1751	0.000748965
gene	ENSDARG00000060103	-0.769736	3.27535	18.4224	1.76966e-05	2.81701	3.44248	0.00076483
gene	ENSDARG00000101795	-2.26074	0.222236	18.3497	1.83844e-05	-0.985489	1.01123	0.00079338
gene	ENSDARG00000092903	0.772839	3.30479	18.2728	1.91417e-05	3.40492	2.49972	0.000824845
gene	ENSDARG00000074341	1.13348	2.38307	18.2612	1.92593e-05	3.2302	1.97137	0.000828687
gene	ENSDARG00000098424	-1.05564	2.55293	18.2548	1.93239e-05	2.07079	2.97058	0.000830246
gene	ENSDARG00000012204	-0.694435	3.55538	18.1612	2.02974e-05	3.42096	3.96359	0.000870791
gene	ENSDARG00000078995	-2.54492	0.987648	18.1548	2.03661e-05	-2.08381	-0.0482411	0.000872456
gene	ENSDARG00000097091	2.64988	-0.665547	18.1275	2.06595e-05	0.390574	-2.052	0.000883731
gene	ENSDARG00000103827	1.98648	0.921971	18.0843	2.11333e-05	1.95127	-0.11804	0.000901671
gene	ENSDARG00000102378	-2.01015	1.10952	18.0837	2.11406e-05	-0.491697	1.26949	0.000901671
gene	ENSDARG00000007711	-0.957025	2.70655	18.0282	2.17653e-05	2.46452	3.27707	0.00092696
gene	ENSDARG00000003303	-1.98838	1.18253	17.9929	2.21726e-05	-0.491193	1.22551	0.000942932
gene	ENSDARG00000031372	-1.43399	1.91987	17.9879	2.22309e-05	1.1742	2.41727	0.000944036
gene	ENSDARG00000104064	1.77327	1.46028	17.9285	2.29366e-05	1.78097	-0.0457243	0.000972592
gene	ENSDARG00000091627	-6.76415	-1.70404	17.9241	2.29896e-05	-3.869	-1.07409	0.000973427
gene	ENSDARG00000039887	-0.68572	4.30732	17.8671	2.36882e-05	4.03809	4.56933	0.00100155
gene	ENSDARG00000010738	0.793222	3.09927	17.851	2.38899e-05	3.67043	2.73152	0.00100862
gene	ENSDARG00000028469	-2.80577	-0.312918	17.7875	2.46998e-05	-2.426	-0.26568	0.00104131
gene	ENSDARG00000116086	-1.73445	1.41245	17.7073	2.57633e-05	0.493494	2.02294	0.00108458
gene	ENSDARG00000044902	-0.695192	4.49	17.6685	2.62941e-05	4.45432	4.98929	0.00110082
gene	ENSDARG00000053800	-0.861763	2.91439	17.6683	2.62974e-05	2.60591	3.32713	0.00110082
gene	ENSDARG00000053835	-1.42826	1.90437	17.6759	2.61928e-05	1.17362	2.44077	0.00110082
gene	ENSDARG00000113348	-2.8423	-0.87946	17.6681	2.62998e-05	-2.154	0.121944	0.00110082
gene	ENSDARG00000113284	-2.32182	-0.0254389	17.6484	2.65738e-05	-1.36824	0.618344	0.0011107
gene	ENSDARG00000074734	0.803491	5.20658	17.6306	2.68237e-05	5.97818	5.0403	0.00111954
gene	ENSDARG00000057751	-3.01138	-0.446471	17.6166	2.7022e-05	-2.70054	-0.450593	0.00112621
gene	ENSDARG00000020645	0.841123	5.4538	17.5805	2.75397e-05	6.09532	5.07422	0.00114615
gene	ENSDARG00000104407	-2.35729	-0.464868	17.5657	2.77547e-05	-1.31457	0.690658	0.00115346
gene	ENSDARG00000070845	-5.40654	-1.83431	17.552	2.7956e-05	-3.54387	-0.184611	0.00116018
gene	ENSDARG00000113274	-1.02928	2.50271	17.5276	2.83169e-05	2.52533	3.43019	0.00117348
gene	ENSDARG00000020890	-0.898738	6.0754	17.517	2.84758e-05	5.66387	6.40522	0.0011784
gene	ENSDARG00000010132	0.668296	4.20825	17.4536	2.94399e-05	4.67002	3.84556	0.00121657
gene	ENSDARG00000088972	-0.667164	3.67511	17.4448	2.95771e-05	3.54689	4.07844	0.00121922
gene	ENSDARG00000087757	-6.77726	-1.75511	17.4441	2.95875e-05	-3.869	-1.07171	0.00121922
gene	ENSDARG00000109861	-1.98939	1.2554	17.4104	3.01173e-05	-0.808819	0.901317	0.00123931
gene	ENSDARG00000104266	2.36746	-0.253412	17.4005	3.02746e-05	0.591505	-1.67524	0.00124403
gene	ENSDARG00000113721	6.28097	-1.3688	17.3848	3.0525e-05	-1.3424	-4.0452	0.00125255
gene	ENSDARG00000051899	3.80132	-1.32471	17.335	3.13367e-05	-0.290027	-3.23718	0.00128406
gene	ENSDARG00000013397	0.681665	4.4054	17.2996	3.19262e-05	4.86691	4.06263	0.00130638
gene	ENSDARG00000054864	-0.842584	7.82075	17.2812	3.22353e-05	7.56972	8.25424	0.00131719
gene	ENSDARG00000112931	0.681545	4.35393	17.2724	3.23855e-05	4.63336	3.83282	0.00132147
gene	ENSDARG00000031387	-1.80795	1.22908	17.2613	3.2576e-05	0.322363	1.92372	0.00132739
gene	ENSDARG00000098958	-1.97248	0.761337	17.0617	3.61841e-05	0.0260815	1.76634	0.00147221
gene	ENSDARG00000053293	-2.12063	0.727938	17.0593	3.62309e-05	-0.812677	1.02539	0.00147221
gene	ENSDARG00000068365	-1.81931	1.15031	17.0398	3.6605e-05	0.381883	1.97263	0.00148535
gene	ENSDARG00000090472	4.09352	-1.37667	17.0242	3.69062e-05	-0.496924	-3.46148	0.0014955
gene	ENSDARG00000002467	0.680637	3.48887	16.9289	3.88063e-05	3.99902	3.182	0.00157031
gene	ENSDARG00000099272	-6.48141	-1.60338	16.9203	3.89819e-05	-3.869	-1.28544	0.00157524
gene	ENSDARG00000006527	0.665621	3.57252	16.9029	3.93412e-05	4.13068	3.3428	0.00158756
gene	ENSDARG00000018797	0.889241	7.05202	16.8286	4.09128e-05	6.36855	5.31912	0.0016487
gene	ENSDARG00000043342	-1.77709	1.15607	16.7927	4.16925e-05	0.705996	2.25481	0.00167781
gene	ENSDARG00000116065	-0.850268	5.68515	16.7627	4.23568e-05	5.16252	5.87916	0.00170219
gene	ENSDARG00000089661	-7.31313	-2.05332	16.7555	4.25188e-05	-3.869	-0.547182	0.00170636
gene	ENSDARG00000098391	0.701338	3.3405	16.6951	4.38947e-05	3.87782	3.04721	0.00175916
gene	ENSDARG00000091972	1.98842	0.898326	16.6828	4.41804e-05	1.37282	-0.608391	0.00176818
gene	ENSDARG00000109164	-2.15755	0.276377	16.6331	4.53525e-05	-1.00087	0.829316	0.00181261
gene	ENSDARG00000044253	2.17321	-0.154665	16.6168	4.57447e-05	0.932875	-1.17635	0.00182579
gene	ENSDARG00000101104	-6.43407	-1.59972	16.5982	4.6195e-05	-3.869	-1.34189	0.00184125
gene	ENSDARG00000021370	0.645596	4.14841	16.582	4.65916e-05	4.62852	3.86179	0.00185452
gene	ENSDARG00000074531	1.5235	1.63213	16.5687	4.69186e-05	2.57637	0.931815	0.001865
gene	ENSDARG00000040009	-0.885943	6.51279	16.5642	4.70307e-05	6.09972	6.84069	0.00186691
gene	ENSDARG00000091584	1.25982	2.06083	16.5356	4.77454e-05	3.00018	1.61859	0.00189098
gene	ENSDARG00000077583	0.654915	3.61826	16.5315	4.78492e-05	4.13837	3.35782	0.00189098
gene	ENSDARG00000052978	-0.85465	2.84855	16.5308	4.78656e-05	2.64344	3.35135	0.00189098
gene	ENSDARG00000060711	-2.28079	-0.0146969	16.5296	4.78959e-05	-1.45809	0.465909	0.00189098
gene	ENSDARG00000023600	-0.683353	3.42084	16.5088	4.84252e-05	3.24655	3.78152	0.0019093
gene	ENSDARG00000105175	2.46439	-0.662774	16.497	4.87266e-05	0.496904	-1.86272	0.00191859
gene	ENSDARG00000055504	-2.04448	0.348821	16.4814	4.91296e-05	-0.491193	1.34197	0.00193186
gene	ENSDARG00000012632	-2.39948	-0.235754	16.4774	4.9234e-05	-1.795	0.184757	0.00193336
gene	ENSDARG00000028784	-7.43286	-2.11537	16.4363	5.03117e-05	-3.869	-0.53569	0.00197303
gene	ENSDARG00000027070	-2.25932	-0.134313	16.4142	5.09021e-05	-1.37606	0.50453	0.00199351
gene	ENSDARG00000094197	3.87459	-1.47607	16.3827	5.17556e-05	-0.19385	-3.2274	0.00202422
gene	ENSDARG00000018820	-0.771312	5.16841	16.3716	5.20585e-05	4.90087	5.54431	0.00203334
gene	ENSDARG00000078167	2.29294	-0.198557	16.3367	5.30264e-05	0.505738	-1.66937	0.00206838
gene	ENSDARG00000086256	0.757369	3.09327	16.3242	5.33784e-05	3.6785	2.80379	0.00207934
gene	ENSDARG00000034717	2.6354	-0.759205	16.314	5.36665e-05	0.149904	-2.23447	0.00208778
gene	ENSDARG00000035622	-0.873508	6.26314	16.2724	5.48563e-05	5.85136	6.58464	0.00213123
gene	ENSDARG00000060564	1.50616	1.67239	16.2564	5.5323e-05	2.35099	0.757995	0.0021465
gene	ENSDARG00000013763	0.771021	5.1824	16.2487	5.55481e-05	5.65336	4.73231	0.00215238
gene	ENSDARG00000059916	-1.6065	1.50481	16.1678	5.79725e-05	0.601353	2.04171	0.00224334
gene	ENSDARG00000071414	0.673483	4.62189	16.1588	5.82466e-05	5.6768	4.88534	0.002248
gene	ENSDARG00000069093	-2.27044	-0.675171	16.1608	5.81867e-05	-1.10398	0.824091	0.002248
gene	ENSDARG00000103554	-2.26518	-0.51607	16.1552	5.83583e-05	-1.26368	0.690375	0.00224933
gene	ENSDARG00000098428	-6.32538	-1.55587	16.14	5.88269e-05	-3.869	-1.4628	0.00226441
gene	ENSDARG00000027394	2.07714	0.00661306	16.0953	6.02324e-05	1.16327	-0.937079	0.00231395
gene	ENSDARG00000100968	-1.87679	0.838688	16.0941	6.02723e-05	0.214884	1.89966	0.00231395
gene	ENSDARG00000069065	0.736053	3.19073	16.0771	6.08149e-05	3.54231	2.66895	0.00233172
gene	ENSDARG00000056855	0.825921	2.87672	16.0618	6.1308e-05	3.56377	2.60353	0.00234754
gene	ENSDARG00000035452	-1.38232	1.87799	16.0397	6.20277e-05	1.06363	2.30725	0.00237199
gene	ENSDARG00000098357	-3.527	-1.10205	16.0288	6.23878e-05	-3.11273	-0.742899	0.00238264
gene	ENSDARG00000035649	-0.759277	5.16759	16.0136	6.28907e-05	5.18012	5.80124	0.00239871
gene	ENSDARG00000067996	0.625049	3.91678	16.0016	6.32875e-05	4.5107	3.75423	0.0024107
gene	ENSDARG00000015575	1.07826	2.36808	15.9974	6.34298e-05	3.02133	1.80478	0.00241298
gene	ENSDARG00000103026	-0.639505	4.15833	15.963	6.45943e-05	3.84824	4.35671	0.00245408
gene	ENSDARG00000062058	-0.667281	3.47413	15.9379	6.5455e-05	3.21165	3.75712	0.00248307
gene	ENSDARG00000056976	-7.11186	-2.03942	15.9358	6.55273e-05	-3.869	-0.714189	0.00248307
gene	ENSDARG00000074052	-7.40649	-2.14368	15.9255	6.58866e-05	-3.869	-0.482179	0.00249345
gene	ENSDARG00000035406	0.646237	3.57939	15.8963	6.69088e-05	4.07829	3.31936	0.00252886
gene	ENSDARG00000095339	-0.627534	3.86085	15.8861	6.72704e-05	3.74763	4.22529	0.0025327
gene	ENSDARG00000045506	-0.805231	2.9436	15.8878	6.72102e-05	2.66602	3.32063	0.0025327
gene	ENSDARG00000110917	-3.10071	-1.24064	15.8863	6.72626e-05	-2.41304	0.0296695	0.0025327
gene	ENSDARG00000077256	-0.683127	4.68576	15.8524	6.84796e-05	4.64732	5.19733	0.0025749
gene	ENSDARG00000013082	1.48447	1.65053	15.8396	6.89432e-05	2.45709	0.890324	0.002589
gene	ENSDARG00000099829	2.26908	-0.39703	15.8328	6.9193e-05	0.5543	-1.62828	0.00259172
gene	ENSDARG00000100372	0.951084	2.60674	15.8341	6.91453e-05	3.1662	2.09349	0.00259172
gene	ENSDARG00000102282	-6.20143	-1.47532	15.7987	7.04527e-05	-3.869	-1.55975	0.00263553
gene	ENSDARG00000089701	0.936483	2.63511	15.7667	7.1654e-05	3.17747	2.11438	0.00267704
gene	ENSDARG00000086159	1.48621	1.59829	15.7562	7.20517e-05	2.7262	1.11655	0.00268846
gene	ENSDARG00000054288	0.699526	3.28494	15.7442	7.25105e-05	3.71462	2.86915	0.00269525
gene	ENSDARG00000102129	-0.302351	12.5803	15.7452	7.24732e-05	12.4458	12.597	0.00269525
gene	ENSDARG00000078731	-7.38803	-2.15063	15.748	7.23654e-05	-3.869	-0.485924	0.00269525
gene	ENSDARG00000045822	-0.817454	5.63671	15.7281	7.31295e-05	5.26356	5.94161	0.00271481
gene	ENSDARG00000086744	2.20704	-0.221485	15.7221	7.33605e-05	0.65524	-1.52472	0.00271992
gene	ENSDARG00000002230	-2.22844	-0.090958	15.6901	7.46148e-05	-1.46679	0.420588	0.00276292
gene	ENSDARG00000012572	0.634477	3.65468	15.6813	7.49609e-05	4.16488	3.39743	0.00277223
gene	ENSDARG00000101281	-0.857254	6.31408	15.6706	7.53884e-05	6.14712	6.84984	0.00278451
gene	ENSDARG00000098218	3.07925	-1.17966	15.6495	7.62312e-05	-0.0413931	-2.68688	0.00281208
gene	ENSDARG00000069723	2.15272	-0.210924	15.6411	7.65735e-05	0.792614	-1.34634	0.00282035
gene	ENSDARG00000020924	-1.80981	1.07082	15.6392	7.66482e-05	0.0136832	1.63301	0.00282035
gene	ENSDARG00000076831	-2.2526	-0.172449	15.5985	7.83171e-05	-1.54826	0.30551	0.00287813
gene	ENSDARG00000013750	-2.35693	-0.376469	15.595	7.84633e-05	-1.78574	0.143694	0.00287988
gene	ENSDARG00000070059	1.20825	2.1042	15.5658	7.96847e-05	2.81524	1.5067	0.00292104
gene	ENSDARG00000045979	-0.329597	12.3048	15.5629	7.98046e-05	12.3052	12.4998	0.00292177
gene	ENSDARG00000078001	-3.60157	-1.31177	15.5176	8.1739e-05	-3.06929	-0.584082	0.00298884
gene	ENSDARG00000063249	-0.630666	4.19487	15.5073	8.21872e-05	3.9396	4.43738	0.00300148
gene	ENSDARG00000006283	0.70549	3.26315	15.4982	8.25836e-05	3.57572	2.73287	0.00301118
gene	ENSDARG00000033367	-0.668822	3.38883	15.4965	8.2659e-05	3.21868	3.74842	0.00301118
gene	ENSDARG00000011941	-0.622436	3.74267	15.4864	8.31017e-05	3.68109	4.16063	0.00302354
gene	ENSDARG00000102538	0.622482	4.12304	15.4822	8.32859e-05	4.60969	3.85357	0.00302647
gene	ENSDARG00000071341	-2.73132	-0.885657	15.4509	8.46749e-05	-2.2974	-0.165485	0.00307312
gene	ENSDARG00000002758	0.620607	3.93874	15.4428	8.5039e-05	4.36685	3.59821	0.00308251
gene	ENSDARG00000071084	-1.54853	1.55322	15.3816	8.78373e-05	0.602524	1.93579	0.00317999
gene	ENSDARG00000037962	-0.838437	6.03828	15.3677	8.84887e-05	5.72784	6.4269	0.00319961
gene	ENSDARG00000039832	-0.93085	2.56701	15.3586	8.89139e-05	2.62631	3.43518	0.00321101
gene	ENSDARG00000069692	-6.23106	-1.5751	15.3462	8.95012e-05	-3.869	-1.52006	0.00322823
gene	ENSDARG00000043661	-1.95116	0.677942	15.2808	9.26516e-05	-0.520635	1.1813	0.00333774
gene	ENSDARG00000041947	1.80891	1.29376	15.27	9.31869e-05	1.1386	-0.72633	0.00335289
gene	ENSDARG00000074983	-0.446497	11.1553	15.246	9.43771e-05	10.7996	11.0959	0.00339154
gene	ENSDARG00000052859	0.644117	3.5534	15.2355	9.49033e-05	3.89933	3.11916	0.00340208
gene	ENSDARG00000104517	-0.858453	2.74613	15.2368	9.48357e-05	2.60859	3.3344	0.00340208
gene	ENSDARG00000055678	1.76796	0.98912	15.222	9.55857e-05	2.10507	0.219704	0.00342234
gene	ENSDARG00000061044	1.95568	0.484905	15.1637	9.85797e-05	1.30715	-0.644723	0.00352522
gene	ENSDARG00000004325	-0.787381	2.96417	15.1392	9.98661e-05	2.52351	3.16274	0.00356686
gene	ENSDARG00000060126	1.02451	2.37976	15.1238	0.000100686	3.25993	2.14694	0.00359174
gene	ENSDARG00000021082	-0.759079	3.04104	15.114	0.00010121	2.66947	3.25591	0.00360605
gene	ENSDARG00000112691	-0.661138	3.36924	15.1036	0.000101767	3.24168	3.774	0.0036209
gene	ENSDARG00000039980	-0.662904	4.6364	15.1005	0.000101936	4.45605	4.97528	0.0036209
gene	ENSDARG00000103054	-1.10284	2.4573	15.0993	0.000101999	0.967799	1.91236	0.0036209
gene	ENSDARG00000002536	-0.625114	3.67196	15.0906	0.000102473	3.4671	3.95405	0.00363332
gene	ENSDARG00000068256	0.623305	3.66708	15.0769	0.000103218	4.11098	3.35563	0.00365528
gene	ENSDARG00000046021	1.90103	0.462505	15.0701	0.000103594	1.66649	-0.319803	0.00366415
gene	ENSDARG00000056203	1.27512	1.91261	15.0636	0.000103947	2.99624	1.58909	0.00367221
gene	ENSDARG00000102468	-2.26914	-0.427702	15.0351	0.000105528	-1.61848	0.245792	0.00372357
gene	ENSDARG00000042021	3.29559	-1.22787	14.965	0.000109524	-0.410296	-3.04392	0.00385523
gene	ENSDARG00000059646	-0.651501	4.54927	14.9672	0.000109395	4.27678	4.77739	0.00385523
gene	ENSDARG00000103037	-2.16676	-0.00215529	14.9208	0.000112118	-1.44756	0.376115	0.0039418
gene	ENSDARG00000068641	0.648452	4.54583	14.9113	0.000112687	4.96219	4.17952	0.00395703
gene	ENSDARG00000032264	2.75458	-1.00364	14.8906	0.000113931	-0.00509034	-2.4624	0.00399592
gene	ENSDARG00000110878	1.48265	1.60379	14.8183	0.00011838	2.17259	0.601232	0.004147
gene	ENSDARG00000105274	1.5303	1.45319	14.7895	0.000120203	2.4056	0.761037	0.00420582
gene	ENSDARG00000074754	-6.87919	-2.03894	14.7805	0.000120781	-3.869	-0.95511	0.00422097
gene	ENSDARG00000104787	0.809018	2.84853	14.7742	0.00012118	3.39613	2.47283	0.00422985
gene	ENSDARG00000056386	1.53245	1.44471	14.7698	0.000121464	2.4084	0.757556	0.00423471
gene	ENSDARG00000009026	0.722604	5.04156	14.7541	0.000122481	4.98478	4.09154	0.0042651
gene	ENSDARG00000091900	6.76951	-2.01037	14.7471	0.000122938	-0.920107	-4.0452	0.00427589
gene	ENSDARG00000080337	-0.584736	9.74508	14.7448	0.000123088	9.51565	9.96354	0.00427603
gene	ENSDARG00000034457	2.1103	-0.04567	14.7338	0.000123806	0.596081	-1.46005	0.00429585
gene	ENSDARG00000115234	-0.158938	13.8834	14.7059	0.00012565	13.6666	13.6742	0.00435469
gene	ENSDARG00000101341	-0.608154	3.70149	14.6817	0.000127279	3.6529	4.11654	0.0044059
gene	ENSDARG00000075559	0.736154	5.23094	14.6698	0.000128085	5.92009	5.05089	0.00442856
gene	ENSDARG00000098647	2.29878	-0.636114	14.6487	0.000129523	0.399687	-1.79761	0.0044721
gene	ENSDARG00000032102	-0.714807	5.06153	14.6469	0.000129651	4.73338	5.31146	0.0044721
gene	ENSDARG00000101749	-1.89965	0.407892	14.6283	0.000130937	-0.321041	1.38659	0.00451115
gene	ENSDARG00000078599	-2.2578	-0.361313	14.6251	0.000131158	-1.70072	0.113541	0.00451345
gene	ENSDARG00000092692	3.8526	-1.5904	14.6053	0.000132543	-0.215104	-3.23843	0.00455573
gene	ENSDARG00000039881	3.17439	-1.1181	14.6022	0.000132759	-0.496924	-3.04759	0.0045578
gene	ENSDARG00000110877	-2.97788	-1.15848	14.583	0.00013412	-2.54562	-0.292491	0.00459912
gene	ENSDARG00000042418	2.52254	-0.995561	14.5707	0.000135	0.385682	-1.95296	0.00461844
gene	ENSDARG00000044894	-2.46942	-0.788229	14.5714	0.000134946	-1.97649	0.0209703	0.00461844
gene	ENSDARG00000101450	1.97718	0.0837292	14.5657	0.000135354	1.03894	-0.946355	0.00462514
gene	ENSDARG00000006981	-1.4915	1.55999	14.5587	0.000135861	0.714414	2.01835	0.00463703
gene	ENSDARG00000022810	0.779392	2.89519	14.5404	0.000137185	3.53359	2.62574	0.00467679
gene	ENSDARG00000042496	-1.43842	1.55209	14.5045	0.000139826	1.42667	2.72292	0.00476126
gene	ENSDARG00000005980	0.61976	4.30977	14.4927	0.000140707	4.58202	3.82676	0.00478444
gene	ENSDARG00000102171	-0.605293	4.09623	14.4909	0.000140835	3.85429	4.31601	0.00478444
gene	ENSDARG00000069467	-1.05082	2.36079	14.4765	0.000141919	1.66666	2.55022	0.00481568
gene	ENSDARG00000040039	-0.91404	2.57773	14.4622	0.000142998	2.36384	3.1386	0.00484667
gene	ENSDARG00000021113	-0.605062	3.6752	14.4372	0.000144909	3.62407	4.07742	0.00488957
gene	ENSDARG00000057635	-0.669498	3.32548	14.4369	0.000144933	2.90897	3.42713	0.00488957
gene	ENSDARG00000045064	-0.812568	6.05152	14.4406	0.000144651	5.85401	6.52187	0.00488957
gene	ENSDARG00000097650	-2.1175	-0.238332	14.4417	0.000144566	-1.34809	0.429337	0.00488957
gene	ENSDARG00000052957	-0.751342	5.38014	14.4014	0.000147689	5.18376	5.78743	0.00497679
gene	ENSDARG00000094388	-4.1501	-1.19098	14.3834	0.000149108	-3.54974	-1.28231	0.00501881
gene	ENSDARG00000101759	-0.758634	2.97857	14.3793	0.000149433	2.63496	3.23453	0.00502398
gene	ENSDARG00000103834	-0.607815	4.24589	14.3394	0.000152634	4.06002	4.51897	0.00512569
gene	ENSDARG00000000656	-2.95493	-1.02283	14.3295	0.000153438	-2.68431	-0.521342	0.00514679
gene	ENSDARG00000059423	6.95267	-2.12307	14.3143	0.000154684	-0.75766	-4.0452	0.00516169
gene	ENSDARG00000014685	2.48771	-0.779903	14.3156	0.000154577	0.0172441	-2.23773	0.00516169
gene	ENSDARG00000052000	0.791954	7.46311	14.3157	0.000154572	8.02218	7.09578	0.00516169
gene	ENSDARG00000100939	-0.63905	4.58447	14.3158	0.000154564	4.39539	4.89859	0.00516169
gene	ENSDARG00000087070	-2.26056	-0.686327	14.3133	0.000154766	-1.53429	0.330327	0.00516169
gene	ENSDARG00000040505	-1.00859	2.3956	14.3088	0.000155137	1.9652	2.82104	0.00516816
gene	ENSDARG00000091931	0.739923	3.02975	14.3054	0.00015542	3.40412	2.53749	0.00517169
gene	ENSDARG00000036164	-0.62174	4.30628	14.2939	0.000156367	3.76484	4.24952	0.00519139
gene	ENSDARG00000068436	-0.727073	5.21076	14.2954	0.000156247	4.90588	5.4866	0.00519139
gene	ENSDARG00000062080	2.59384	-1.03885	14.2862	0.000157009	0.235624	-2.13327	0.00520677
gene	ENSDARG00000038847	-1.78934	0.883257	14.2779	0.000157702	-0.0713767	1.52534	0.00522383
gene	ENSDARG00000056530	-0.727082	5.23505	14.2407	0.000160857	5.09148	5.68769	0.0053223
gene	ENSDARG00000015476	-6.69922	-2.00803	14.2265	0.00016207	-3.869	-1.1406	0.00535638
gene	ENSDARG00000115704	-6.34898	-1.81611	14.2107	0.000163442	-3.869	-1.39527	0.00539561
gene	ENSDARG00000062382	-0.616124	3.54565	14.2008	0.0001643	3.4002	3.87826	0.00541781
gene	ENSDARG00000077415	-6.52567	-1.92541	14.1949	0.00016482	-3.869	-1.22899	0.00542883
gene	ENSDARG00000054848	-1.28141	1.90229	14.1725	0.00016679	1.18963	2.30292	0.00548754
gene	ENSDARG00000004246	-0.611837	3.56813	14.1633	0.000167604	3.45296	3.90599	0.00550193
gene	ENSDARG00000003512	-1.95672	-0.113889	14.1637	0.000167577	-0.75513	0.918707	0.00550193
gene	ENSDARG00000104708	0.66432	3.27233	14.1521	0.000168607	3.71239	2.91404	0.00552863
gene	ENSDARG00000059925	-0.702648	3.12163	14.1179	0.000171702	2.87214	3.41262	0.00562382
gene	ENSDARG00000096506	-1.75573	0.687201	14.1153	0.000171935	0.47603	2.00156	0.00562516
gene	ENSDARG00000111069	-3.741	-1.56001	14.1088	0.000172534	-3.05242	-0.467279	0.00563843
gene	ENSDARG00000062325	1.79511	0.857876	14.0735	0.000175799	1.53321	-0.350192	0.00573871
gene	ENSDARG00000068939	-2.98585	-1.30143	14.0628	0.000176806	-2.426	-0.0581716	0.00576514
gene	ENSDARG00000069276	4.27985	-1.75162	14.0372	0.000179225	-0.308592	-3.46148	0.00583751
gene	ENSDARG00000104370	2.01014	-0.405329	14.0146	0.000181395	0.926934	-1.07651	0.0059016
gene	ENSDARG00000007901	-0.617633	4.4296	14.0034	0.000182483	4.15683	4.6347	0.00592379
gene	ENSDARG00000102574	-7.08286	-2.1832	14.0044	0.000182387	-3.869	-0.819076	0.00592379
gene	ENSDARG00000075958	-2.21993	-0.420188	13.9897	0.000183812	-1.69159	0.0967032	0.00596034
gene	ENSDARG00000102638	-1.97121	0.209653	13.9545	0.000187288	-0.982717	0.718255	0.00606632
gene	ENSDARG00000100412	-2.76625	-1.07125	13.9467	0.00018807	-2.38947	-0.25516	0.00608488
gene	ENSDARG00000014506	0.604964	3.68568	13.9317	0.000189579	3.95179	3.21134	0.00612693
gene	ENSDARG00000102156	-3.27277	-1.41192	13.9221	0.000190549	-2.7156	-0.296108	0.00615148
gene	ENSDARG00000045542	0.5948	4.15726	13.9008	0.000192716	4.49353	3.78401	0.00621456
gene	ENSDARG00000077967	-0.677048	4.94445	13.8962	0.00019319	4.79428	5.32884	0.00622297
gene	ENSDARG00000033804	-0.636894	3.37922	13.8669	0.000196222	3.15763	3.65138	0.00630674
gene	ENSDARG00000055284	-1.29633	1.84589	13.8686	0.000196049	1.14678	2.28377	0.00630674
gene	ENSDARG00000021805	-0.826288	2.7547	13.8461	0.000198407	2.4147	3.09831	0.00636994
gene	ENSDARG00000027552	-0.601378	4.29588	13.8428	0.000198762	4.0981	4.54233	0.00637433
gene	ENSDARG00000054931	-2.44029	-0.300564	13.8395	0.000199107	-2.27198	-0.401035	0.00637842
gene	ENSDARG00000007279	-0.887115	2.62047	13.8073	0.000202552	2.19771	2.92798	0.00648168
gene	ENSDARG00000102356	-0.642157	4.67955	13.799	0.00020344	4.34791	4.85158	0.00650297
gene	ENSDARG00000061473	-1.03155	2.28473	13.786	0.00020486	2.08959	2.96447	0.0065412
gene	ENSDARG00000069265	-1.85404	0.545066	13.7799	0.000205524	-0.45141	1.18964	0.00655524
gene	ENSDARG00000067977	-1.95532	0.374322	13.7551	0.000208254	-0.965177	0.710508	0.00663507
gene	ENSDARG00000102123	-2.78503	-1.11381	13.7321	0.000210822	-2.39491	-0.229056	0.00670955
gene	ENSDARG00000087575	-6.9924	-2.17568	13.7258	0.000211529	-3.869	-0.828239	0.00672474
gene	ENSDARG00000029764	1.87163	0.264705	13.6948	0.000215045	1.21613	-0.683006	0.00682434
gene	ENSDARG00000007943	-0.864168	2.63954	13.6941	0.000215129	2.39897	3.11496	0.00682434
gene	ENSDARG00000104600	-0.694315	3.11687	13.6691	0.000218012	2.81162	3.37358	0.00690828
gene	ENSDARG00000060951	-1.03344	2.30636	13.6537	0.000219808	1.78719	2.68718	0.00695766
gene	ENSDARG00000100227	0.601948	4.34349	13.6468	0.000220619	4.67763	3.9236	0.00697576
gene	ENSDARG00000089839	-6.33728	-1.87062	13.6446	0.00022087	-3.869	-1.47114	0.00697615
gene	ENSDARG00000031283	-0.780564	7.33954	13.6298	0.000222629	6.83712	7.46573	0.0070241
gene	ENSDARG00000074869	0.755136	2.92295	13.6155	0.000224323	3.34447	2.46146	0.00705682
gene	ENSDARG00000101120	0.615933	4.53416	13.6151	0.000224375	5.02626	4.28679	0.00705682
gene	ENSDARG00000040248	-0.644619	4.73496	13.615	0.00022439	4.41588	4.91095	0.00705682
gene	ENSDARG00000040741	-1.17457	2.01967	13.5992	0.000226285	1.59761	2.58867	0.00710877
gene	ENSDARG00000003675	0.593128	4.10057	13.5811	0.000228475	4.22906	3.51326	0.00715722
gene	ENSDARG00000075855	-1.90463	0.332542	13.5804	0.000228563	-0.793672	0.847058	0.00715722
gene	ENSDARG00000103497	-2.27495	-0.793293	13.5829	0.00022826	-1.61625	0.264763	0.00715722
gene	ENSDARG00000001057	0.654527	4.84058	13.5724	0.000229537	5.34416	4.55079	0.00718003
gene	ENSDARG00000116216	4.23007	-1.75646	13.5595	0.000231116	-0.393951	-3.47353	0.00721398
gene	ENSDARG00000112032	2.53021	-0.898386	13.5607	0.000230975	-0.0630223	-2.34299	0.00721398
gene	ENSDARG00000101653	-1.9602	-0.048377	13.5504	0.000232242	-1.02223	0.62545	0.00724139
gene	ENSDARG00000087452	0.680764	3.11554	13.5356	0.000234076	3.71322	2.90106	0.0072908
gene	ENSDARG00000044325	-0.798253	6.80047	13.5283	0.000234989	6.27367	6.92692	0.00731145
gene	ENSDARG00000057125	6.3309	-1.90363	13.5245	0.000235467	-1.2962	-4.0452	0.00731851
gene	ENSDARG00000056729	-6.32377	-1.8774	13.5197	0.000236071	-3.869	-1.47019	0.00732949
gene	ENSDARG00000114577	1.28073	1.84689	13.5122	0.000237013	2.35504	0.954886	0.00735094
gene	ENSDARG00000094133	-0.754669	2.8937	13.4987	0.00023873	2.7368	3.33023	0.00739631
gene	ENSDARG00000110670	-1.94294	-0.104928	13.4926	0.000239512	-0.941836	0.710972	0.0074127
gene	ENSDARG00000033655	-0.910137	2.57002	13.4797	0.000241163	1.99678	2.74074	0.0074559
gene	ENSDARG00000088117	-1.15246	2.05756	13.451	0.000244877	1.53481	2.52794	0.00756271
gene	ENSDARG00000061421	-1.69052	0.90264	13.393	0.000252567	0.264491	1.73744	0.00779196
gene	ENSDARG00000045199	-0.648699	4.80249	13.3808	0.000254209	4.44397	4.9301	0.00782914
gene	ENSDARG00000098444	-2.00218	-0.0533891	13.3801	0.000254308	-1.22027	0.458917	0.00782914
gene	ENSDARG00000025559	-2.41514	-0.794418	13.3735	0.000255211	-2.07692	-0.163573	0.00784866
gene	ENSDARG00000044684	2.81202	-1.08587	13.3394	0.000259894	-0.336439	-2.72085	0.00797661
gene	ENSDARG00000099774	1.34817	1.68362	13.3392	0.000259917	2.34941	0.904413	0.00797661
gene	ENSDARG00000096637	2.94549	-1.15003	13.3193	0.000262683	-0.432201	-2.87701	0.00804461
gene	ENSDARG00000007172	-1.84738	0.534883	13.3206	0.000262502	-0.55978	1.00118	0.00804461
gene	ENSDARG00000115489	-3.02031	-1.00348	13.3061	0.000264543	-2.92107	-0.854781	0.00809307
gene	ENSDARG00000105781	1.83088	0.311195	13.2993	0.000265507	1.28406	-0.599004	0.00811406
gene	ENSDARG00000009702	-1.91976	-0.278046	13.2952	0.000266089	-0.836117	0.844932	0.008118
gene	ENSDARG00000094451	-1.97066	-0.334759	13.2945	0.000266191	-1.04344	0.626982	0.008118
gene	ENSDARG00000059279	-0.575492	3.86951	13.286	0.000267402	3.71132	4.14322	0.00814644
gene	ENSDARG00000059601	1.06609	2.24971	13.2487	0.000272768	2.48866	1.29516	0.00830123
gene	ENSDARG00000074819	-6.5328	-2.02487	13.2453	0.000273271	-3.869	-1.29405	0.00830789
gene	ENSDARG00000101631	-0.643744	4.80519	13.214	0.000277859	4.53188	5.01715	0.00843859
gene	ENSDARG00000100743	-1.72953	0.854018	13.1989	0.000280115	-0.112888	1.39788	0.00849826
gene	ENSDARG00000116575	2.00626	-0.0807709	13.1948	0.000280732	0.481078	-1.4527	0.00850815
gene	ENSDARG00000079622	0.589318	4.07349	13.1736	0.000283917	4.07485	3.32807	0.00859576
gene	ENSDARG00000096678	1.04591	2.21585	13.1552	0.000286723	2.9399	1.77052	0.00867175
gene	ENSDARG00000086647	1.01411	2.25978	13.1427	0.000288643	3.128	1.97628	0.00872077
gene	ENSDARG00000055676	0.768498	2.82202	13.1274	0.000291003	3.4464	2.5336	0.00878301
gene	ENSDARG00000100484	-6.72938	-2.12806	13.12	0.000292163	-3.869	-1.0887	0.0088089
gene	ENSDARG00000054054	2.44142	-0.964383	13.1081	0.000294021	0.103638	-2.13552	0.0088558
gene	ENSDARG00000006266	-0.739281	5.59181	13.1012	0.000295103	5.46349	6.06538	0.00887009
gene	ENSDARG00000075504	-6.98873	-2.22957	13.1028	0.000294855	-3.869	-0.854103	0.00887009
gene	ENSDARG00000078475	-7.19958	-2.30082	13.0917	0.000296608	-3.869	-0.689184	0.00890616
gene	ENSDARG00000045644	1.8449	0.0100924	13.0717	0.000299786	1.1012	-0.753209	0.00899235
gene	ENSDARG00000018921	1.61284	1.0193	13.0686	0.000300291	2.13979	0.418755	0.00899827
gene	ENSDARG00000109743	-6.66371	-2.10457	13.0645	0.000300941	-3.869	-1.17822	0.00899928
gene	ENSDARG00000110949	-6.66371	-2.10457	13.0645	0.000300941	-3.869	-1.17822	0.00899928
gene	ENSDARG00000027986	2.01374	-0.144611	13.0618	0.000301378	0.440086	-1.52378	0.00900312
gene	ENSDARG00000101551	-1.15132	2.02282	13.0497	0.000303334	1.51907	2.51939	0.0090523
gene	ENSDARG00000056322	-1.54435	1.22533	13.0271	0.00030702	0.638258	1.97396	0.00915294
gene	ENSDARG00000104343	1.61924	1.02478	13.0124	0.00030944	1.99979	0.283412	0.00921569
gene	ENSDARG00000009074	1.43009	1.4449	13.0088	0.000310027	2.42778	0.894665	0.00922377
gene	ENSDARG00000024831	-1.81209	0.473186	13.0055	0.000310573	-0.487227	1.06713	0.00923061
gene	ENSDARG00000040072	-0.611286	4.60037	12.9967	0.000312041	4.39473	4.85443	0.00926482
gene	ENSDARG00000101312	0.851201	2.63147	12.9919	0.000312842	3.11212	2.13054	0.00927919
gene	ENSDARG00000074004	-0.650151	3.19307	12.9895	0.000313238	3.06583	3.57359	0.00928152
gene	ENSDARG00000037410	0.650003	3.25425	12.9805	0.000314755	3.47416	2.70299	0.00931701
gene	ENSDARG00000097808	0.966496	2.33733	12.9564	0.000318823	3.21804	2.14931	0.00942788
gene	ENSDARG00000004131	0.593266	4.44753	12.9509	0.000319773	4.86809	4.14182	0.00943685
gene	ENSDARG00000099217	-0.627593	3.32405	12.9524	0.00031951	3.05726	3.55319	0.00943685
gene	ENSDARG00000023443	0.757079	5.847	12.9472	0.000320405	6.33381	5.46585	0.00944596
gene	ENSDARG00000093005	-7.04187	-2.26659	12.9007	0.000328465	-3.869	-0.789723	0.00967384
gene	ENSDARG00000062565	-0.659515	5.03691	12.895	0.000329454	5.38324	5.87355	0.00969319
gene	ENSDARG00000008859	0.649707	4.94842	12.8863	0.000331005	5.64525	4.85717	0.00972901
gene	ENSDARG00000089467	1.79292	0.593576	12.8781	0.000332456	1.21852	-0.616882	0.00975206
gene	ENSDARG00000061848	-1.79439	-0.172041	12.8793	0.00033224	-0.320185	1.21856	0.00975206
gene	ENSDARG00000010266	-2.44089	-1.00937	12.8738	0.000333209	-1.95072	0.0215193	0.00976432
gene	ENSDARG00000061844	-0.584371	4.37137	12.8547	0.000336624	4.20191	4.64567	0.00984464
gene	ENSDARG00000020548	-7.13082	-2.29954	12.856	0.000336405	-3.869	-0.763619	0.00984464
gene	ENSDARG00000087331	0.750861	5.81187	12.8347	0.000340248	6.36057	5.48923	0.00993362
gene	ENSDARG00000069142	-0.604091	3.46375	12.8342	0.000340346	3.149	3.62724	0.00993362
gene	ENSDARG00000061303	-2.0301	-0.11954	12.832	0.000340736	-1.47982	0.204115	0.00993507
gene	ENSDARG00000060069	-1.02268	2.26761	12.8232	0.000342343	1.72942	2.61051	0.00997199
gene	ENSDARG00000003403	-0.663311	3.16566	12.8085	0.000345055	2.8173	3.32798	0.010041
gene	ENSDARG00000043236	1.22667	1.8905	12.8057	0.000345563	2.33101	0.983021	0.0100457
gene	ENSDARG00000115220	-1.94305	-0.0608121	12.7958	0.00034739	-1.16907	0.460528	0.0100888
gene	ENSDARG00000019081	-0.737163	5.64168	12.7875	0.000348943	5.23405	5.83718	0.0101238
gene	ENSDARG00000103395	1.73102	0.596685	12.7799	0.000350363	1.59486	-0.227794	0.010155
gene	ENSDARG00000032242	-2.63623	-1.02724	12.7647	0.000353221	-2.38969	-0.369558	0.0102276
gene	ENSDARG00000089517	-0.771231	6.93274	12.7558	0.000354913	6.54535	7.16859	0.0102665
gene	ENSDARG00000009267	-0.564448	3.89399	12.7107	0.000363563	3.67453	4.10593	0.0105063
gene	ENSDARG00000087352	-1.89761	0.0409897	12.7048	0.000364721	-1.02389	0.581398	0.0105293
gene	ENSDARG00000074311	-0.565248	4.14233	12.6976	0.000366126	4.02646	4.43516	0.0105595
gene	ENSDARG00000006840	-0.862941	2.57978	12.6932	0.000366992	2.24134	2.9813	0.010574
gene	ENSDARG00000070565	-0.617609	3.39602	12.684	0.000368798	2.95193	3.414	0.0106156
gene	ENSDARG00000062797	1.85416	0.368858	12.6642	0.000372734	0.851103	-0.996944	0.0107183
gene	ENSDARG00000111805	-0.69429	8.13136	12.6524	0.000375081	7.94808	8.50493	0.0107735
gene	ENSDARG00000068279	-1.71606	0.928192	12.649	0.000375761	-0.385334	1.13283	0.0107735
gene	ENSDARG00000020863	-4.67607	-1.86019	12.6494	0.000375685	-3.54387	-0.832817	0.0107735
gene	ENSDARG00000104502	1.10742	2.08371	12.6335	0.000378896	2.58977	1.37356	0.0108528
gene	ENSDARG00000044521	-0.749793	5.87517	12.6158	0.000382501	5.53316	6.15331	0.0109453
gene	ENSDARG00000058322	-0.588591	3.57719	12.601	0.000385544	3.20249	3.63099	0.0110216
gene	ENSDARG00000086272	3.02832	-1.34141	12.5696	0.000392065	-0.379609	-2.87341	0.011197
gene	ENSDARG00000017431	-0.618508	3.29816	12.5484	0.000396553	3.13462	3.60662	0.0113141
gene	ENSDARG00000046013	1.77741	0.165839	12.5437	0.00039755	1.25904	-0.587578	0.0113315
gene	ENSDARG00000052375	3.92799	-1.80078	12.5417	0.000397976	-0.155697	-3.23968	0.0113326
gene	ENSDARG00000094995	6.99383	-2.29546	12.5375	0.000398859	-0.719265	-4.0452	0.0113467
gene	ENSDARG00000039299	-0.737194	5.74679	12.5309	0.000400271	5.50966	6.12364	0.0113553
gene	ENSDARG00000010553	-0.776957	2.81617	12.5307	0.000400313	2.26309	2.89353	0.0113553
gene	ENSDARG00000074309	-0.95402	2.3652	12.529	0.000400694	2.00226	2.81407	0.0113553
gene	ENSDARG00000087573	-1.54645	1.13771	12.5288	0.000400717	0.552522	1.9144	0.0113553
gene	ENSDARG00000001234	1.74374	0.604278	12.5241	0.000401732	1.3383	-0.46127	0.0113731
gene	ENSDARG00000037121	-0.598674	4.61966	12.4885	0.000409457	4.58981	5.03727	0.0115805
gene	ENSDARG00000020610	-7.12785	-2.33275	12.4857	0.000410077	-3.869	-0.71786	0.0115869
gene	ENSDARG00000014588	-0.760121	6.15318	12.4831	0.00041066	5.81305	6.4188	0.0115921
gene	ENSDARG00000036754	-0.633014	8.74732	12.471	0.000413319	8.34031	8.81454	0.0116559
gene	ENSDARG00000112168	-1.77927	0.586565	12.4397	0.000420312	-0.556501	0.976596	0.0118417
gene	ENSDARG00000022650	-1.83115	0.0364814	12.4352	0.000421311	-0.808819	0.794978	0.0118584
gene	ENSDARG00000007382	3.82877	-1.61253	12.4287	0.000422778	-0.740008	-3.46021	0.0118799
gene	ENSDARG00000092228	-6.33334	-2.01105	12.4283	0.000422887	-3.869	-1.46372	0.0118799
gene	ENSDARG00000069843	1.40491	1.44837	12.4236	0.000423937	2.26267	0.770687	0.0118979
gene	ENSDARG00000006215	0.756072	6.12662	12.3977	0.000429852	6.55945	5.70359	0.0120524
gene	ENSDARG00000070834	0.664405	3.07306	12.3613	0.000438331	3.60934	2.81203	0.0122783
gene	ENSDARG00000102234	-0.709332	2.92023	12.3323	0.00044518	2.84591	3.39388	0.0124463
gene	ENSDARG00000031712	-6.20795	-1.95246	12.3325	0.000445128	-3.869	-1.51632	0.0124463
gene	ENSDARG00000071103	-1.3677	1.60186	12.3068	0.000451305	0.57556	1.77747	0.0126055
gene	ENSDARG00000003952	-0.73763	5.81421	12.2995	0.000453068	5.2892	5.89818	0.0126426
gene	ENSDARG00000008551	0.868235	2.5446	12.2972	0.000453636	2.97014	1.98371	0.0126464
gene	ENSDARG00000023174	0.612504	3.37586	12.2748	0.000459112	3.53372	2.76017	0.0127869
gene	ENSDARG00000063182	-0.59697	4.62244	12.2631	0.000462003	4.40497	4.84711	0.0128551
gene	ENSDARG00000089463	-1.75977	-0.172923	12.2296	0.000470362	-0.369743	1.16721	0.0130753
gene	ENSDARG00000098544	-0.589668	3.38137	12.2131	0.00047456	3.34363	3.79926	0.0131794
gene	ENSDARG00000015638	0.554102	3.738	12.205	0.000476627	4.19062	3.50519	0.0132243
gene	ENSDARG00000038159	-0.735248	2.84676	12.1967	0.000478741	2.65454	3.23622	0.0132703
gene	ENSDARG00000078011	1.57771	0.993755	12.1739	0.000484625	1.91334	0.243069	0.0134207
gene	ENSDARG00000076697	-6.58154	-2.16286	12.1539	0.00048986	-3.869	-1.23936	0.0135528
gene	ENSDARG00000108401	2.37527	-0.235798	12.143	0.000492734	-0.544932	-2.58165	0.0136194
gene	ENSDARG00000103203	-0.557581	3.67397	12.1392	0.000493739	3.56684	3.98317	0.0136343
gene	ENSDARG00000006257	5.61306	-1.4369	12.125	0.000497499	-1.87585	-4.0452	0.013715
gene	ENSDARG00000090537	-1.6245	0.935684	12.1229	0.000498068	0.0711242	1.46795	0.013715
gene	ENSDARG00000079985	-2.33125	-0.932353	12.1231	0.000498023	-1.94764	-0.09354	0.013715
gene	ENSDARG00000097795	1.2038	1.81604	12.1181	0.000499349	2.59996	1.27896	0.0137373
gene	ENSDARG00000027903	0.633666	3.21834	12.0979	0.000504789	3.47731	2.70279	0.0138647
gene	ENSDARG00000031776	-0.608915	8.89556	12.0974	0.000504929	9.02099	9.49212	0.0138647
gene	ENSDARG00000102307	0.602867	3.35053	12.0942	0.000505788	3.68604	2.93468	0.0138752
gene	ENSDARG00000059442	-1.45407	1.33157	12.0651	0.000513756	0.571945	1.85172	0.0140806
gene	ENSDARG00000011496	-0.572199	4.47005	12.0587	0.000515514	4.43648	4.8593	0.0141155
gene	ENSDARG00000105157	2.29056	-1.01655	12.0426	0.000519994	0.294073	-1.87513	0.0142248
gene	ENSDARG00000061687	-0.709623	2.91045	11.9971	0.000532831	2.68063	3.247	0.0145624
gene	ENSDARG00000089643	1.68164	0.591087	11.9715	0.000540196	1.50712	-0.266298	0.0147361
gene	ENSDARG00000091859	-2.15277	-0.560384	11.9716	0.000540188	-1.88056	-0.197682	0.0147361
gene	ENSDARG00000068507	-0.213714	13.1198	11.9644	0.000542262	13.0156	13.0794	0.0147787
gene	ENSDARG00000088650	0.734509	2.86039	11.9567	0.000544523	3.16638	2.30726	0.0148214
gene	ENSDARG00000044405	0.676095	3.01737	11.9556	0.000544847	3.42332	2.61474	0.0148214
gene	ENSDARG00000079097	-2.06565	-0.649719	11.9431	0.000548501	-1.53058	0.163594	0.014907
gene	ENSDARG00000104640	1.69353	0.467265	11.9403	0.000549334	1.46027	-0.313334	0.0149157
gene	ENSDARG00000021378	-0.716488	2.87518	11.9321	0.00055174	2.69047	3.26344	0.0149672
gene	ENSDARG00000037517	0.546309	3.67869	11.9201	0.000555304	4.27723	3.59396	0.0150499
gene	ENSDARG00000089943	-0.562409	3.57795	11.9076	0.000559041	3.43092	3.84327	0.0151371
gene	ENSDARG00000022712	-0.575913	3.45595	11.8903	0.000564284	3.31903	3.74244	0.0152649
gene	ENSDARG00000104822	-1.95418	-0.415993	11.8884	0.000564835	-1.36943	0.26253	0.0152657
gene	ENSDARG00000070487	1.50013	1.11537	11.8841	0.000566138	2.15522	0.559621	0.015272
gene	ENSDARG00000019962	0.564532	3.65412	11.8858	0.00056565	3.81874	3.1239	0.015272
gene	ENSDARG00000010519	-0.689765	5.44656	11.8825	0.000566638	5.23068	5.78048	0.015272
gene	ENSDARG00000003244	0.557225	3.59567	11.8776	0.000568123	4.05231	3.35956	0.0152979
gene	ENSDARG00000078069	1.8522	-0.0561079	11.8658	0.000571745	0.68428	-1.23384	0.0153813
gene	ENSDARG00000068991	2.05563	-0.634099	11.8426	0.000578915	0.282094	-1.73093	0.0155313
gene	ENSDARG00000063007	1.49613	1.23632	11.8446	0.000578284	1.76348	0.163078	0.0155313
gene	ENSDARG00000092989	-2.49908	-0.614769	11.8432	0.000578708	-2.57744	-0.739561	0.0155313
gene	ENSDARG00000104031	0.748904	2.78879	11.8377	0.000580428	3.24375	2.3675	0.0155576
gene	ENSDARG00000089162	0.56756	3.47229	11.8342	0.000581516	4.00349	3.31239	0.0155609
gene	ENSDARG00000014969	-0.569684	4.45628	11.8339	0.000581615	4.20235	4.62509	0.0155609
gene	ENSDARG00000100043	1.79287	-0.192243	11.8176	0.000586748	0.915714	-0.916841	0.0156838
gene	ENSDARG00000051762	0.552252	3.617	11.7993	0.000592541	4.09855	3.41819	0.0158242
gene	ENSDARG00000003216	-0.610493	8.79744	11.7924	0.00059473	8.67342	9.12494	0.0158682
gene	ENSDARG00000012340	1.6815	0.443964	11.7591	0.000605476	1.43792	-0.314751	0.016129
gene	ENSDARG00000027222	-0.541287	3.8387	11.7569	0.000606191	3.72669	4.12547	0.016129
gene	ENSDARG00000054858	-0.551787	4.26372	11.7553	0.000606714	4.06579	4.47676	0.016129
gene	ENSDARG00000010785	-1.32528	1.55108	11.7569	0.000606183	0.939851	2.10724	0.016129
gene	ENSDARG00000111747	1.0114	2.18336	11.7474	0.000609282	2.74681	1.61861	0.0161825
gene	ENSDARG00000071498	-1.44314	1.58496	11.7441	0.000610366	-0.204237	1.05337	0.0161966
gene	ENSDARG00000032868	-0.584987	4.62187	11.7386	0.000612175	4.35151	4.79054	0.0162299
gene	ENSDARG00000102977	-0.974256	2.28205	11.7343	0.000613594	1.70192	2.52533	0.0162527
gene	ENSDARG00000033754	0.544351	4.23998	11.7052	0.000623272	4.78361	4.08419	0.0164792
gene	ENSDARG00000074403	-2.02859	-0.705713	11.7052	0.000623241	-1.42311	0.255752	0.0164792
gene	ENSDARG00000021853	-1.24637	1.71541	11.6831	0.00063069	1.10213	2.18201	0.0166603
gene	ENSDARG00000091006	-0.565825	4.50439	11.6726	0.000634272	4.47993	4.89627	0.0167397
gene	ENSDARG00000033533	0.553584	4.2801	11.6572	0.000639535	4.49014	3.82385	0.0168482
gene	ENSDARG00000112234	-0.741193	6.39724	11.6586	0.000639065	5.9216	6.5165	0.0168482
gene	ENSDARG00000074310	2.86427	-1.36734	11.6433	0.000644333	-0.256914	-2.72554	0.0169593
gene	ENSDARG00000097203	-1.62968	0.690599	11.637	0.000646513	0.0628124	1.50926	0.0170014
gene	ENSDARG00000029596	1.75753	-0.180842	11.6335	0.000647763	0.983838	-0.794749	0.0170036
gene	ENSDARG00000029556	0.552879	4.35063	11.6335	0.000647747	4.80023	4.1113	0.0170036
gene	ENSDARG00000089402	1.65731	0.680744	11.6265	0.000650196	1.41162	-0.334905	0.0170522
gene	ENSDARG00000019274	-2.20198	-0.297061	11.6222	0.00065171	-2.17399	-0.451927	0.0170766
gene	ENSDARG00000070670	-2.26461	-0.797339	11.619	0.000652816	-2.06919	-0.289991	0.0170902
gene	ENSDARG00000078433	0.538944	3.82553	11.6075	0.000656847	4.21541	3.53274	0.0171803
gene	ENSDARG00000094286	-6.78798	-2.30291	11.6054	0.000657618	-3.869	-1.04415	0.0171851
gene	ENSDARG00000105137	3.25981	-1.4852	11.5993	0.000659776	-0.632958	-3.15162	0.0172261
gene	ENSDARG00000052271	-1.02152	2.22109	11.5912	0.000662651	1.33086	2.18552	0.0172857
gene	ENSDARG00000016656	-0.86766	2.55314	11.5849	0.0006649	1.73272	2.41993	0.0173289
gene	ENSDARG00000074222	2.71628	-1.28875	11.5694	0.000670458	-0.216937	-2.58395	0.0174582
gene	ENSDARG00000092626	3.65929	-1.57504	11.5658	0.000671761	-0.893693	-3.46021	0.0174765
gene	ENSDARG00000013777	1.85037	-0.417174	11.5257	0.000686396	0.671296	-1.18913	0.0177847
gene	ENSDARG00000109596	1.38941	1.47156	11.5234	0.000687259	1.76382	0.219679	0.0177847
gene	ENSDARG00000010789	1.14323	1.89224	11.5277	0.000685652	2.54803	1.28072	0.0177847
gene	ENSDARG00000068992	0.631051	8.49648	11.5282	0.000685469	8.86885	8.1051	0.0177847
gene	ENSDARG00000059231	-0.705284	5.7114	11.5263	0.000686168	5.35419	5.90608	0.0177847
gene	ENSDARG00000086302	-0.746798	2.76843	11.5238	0.00068712	2.48243	3.09078	0.0177847
gene	ENSDARG00000055133	1.55165	1.09556	11.517	0.000689643	1.47468	-0.161925	0.0178279
gene	ENSDARG00000075570	0.555085	4.41067	11.514	0.000690757	4.85015	4.16154	0.0178279
gene	ENSDARG00000062590	-0.643492	8.34991	11.514	0.000690745	8.19423	8.70528	0.0178279
gene	ENSDARG00000039851	-0.538778	4.04186	11.4954	0.000697688	3.80491	4.16356	0.0179909
gene	ENSDARG00000030449	-1.72048	0.684918	11.4892	0.000700007	-0.697338	0.787739	0.0180347
gene	ENSDARG00000074533	-0.716014	5.91477	11.4714	0.000706739	5.75574	6.31985	0.0181921
gene	ENSDARG00000009524	-0.574968	3.3971	11.4695	0.000707467	3.22776	3.6677	0.0181949
gene	ENSDARG00000023026	-3.03931	-1.36887	11.4605	0.000710896	-2.86799	-0.765849	0.0182527
gene	ENSDARG00000086048	-6.28394	-2.10291	11.4604	0.000710966	-3.869	-1.45546	0.0182527
gene	ENSDARG00000104367	6.67648	-2.29196	11.4406	0.00071856	-1.00087	-4.0452	0.0184315
gene	ENSDARG00000068246	1.67868	0.484471	11.428	0.000723438	1.23673	-0.486599	0.0185403
gene	ENSDARG00000004111	4.36455	-1.80142	11.423	0.000725422	-1.00471	-3.72391	0.0185749
gene	ENSDARG00000063665	1.73461	0.178694	11.3904	0.000738233	0.915541	-0.830528	0.0188863
gene	ENSDARG00000093650	1.61344	0.676502	11.3585	0.000751052	1.58828	-0.112938	0.0191975
gene	ENSDARG00000040487	1.10205	2.00505	11.3519	0.000753693	2.27818	1.08183	0.0192482
gene	ENSDARG00000021383	-6.19744	-2.06907	11.3418	0.000757819	-3.869	-1.59127	0.0193366
gene	ENSDARG00000095521	-1.93576	-0.431055	11.3109	0.000770529	-1.44413	0.134979	0.0196438
gene	ENSDARG00000042138	-6.77931	-2.3316	11.3055	0.000772789	-3.869	-1.04252	0.0196842
gene	ENSDARG00000101938	-2.56909	-1.28316	11.3015	0.000774442	-2.14863	-0.12424	0.0197091
gene	ENSDARG00000041550	2.22735	-1.02369	11.2982	0.000775832	0.274483	-1.87918	0.0197212
gene	ENSDARG00000076290	0.61959	3.12746	11.2971	0.000776266	3.68511	2.92092	0.0197212
gene	ENSDARG00000102884	-3.10225	-1.3851	11.2814	0.000782891	-2.96261	-0.846715	0.0198722
gene	ENSDARG00000062477	2.17777	-0.895014	11.2624	0.000790944	0.0842918	-1.95605	0.0200418
gene	ENSDARG00000102493	-0.584941	4.71795	11.263	0.000790683	4.3775	4.78631	0.0200418
gene	ENSDARG00000070057	-1.60079	0.878446	11.2553	0.000793976	-0.13922	1.26793	0.0201012
gene	ENSDARG00000079496	0.617491	3.17309	11.2499	0.000796291	3.49031	2.7282	0.0201424
gene	ENSDARG00000060580	0.548299	4.43453	11.2467	0.000797648	4.97806	4.30557	0.0201593
gene	ENSDARG00000036830	1.64142	0.511088	11.2417	0.000799797	1.44594	-0.325491	0.0201961
gene	ENSDARG00000104037	-6.8223	-2.35459	11.2274	0.00080597	-3.869	-1.05067	0.0203344
gene	ENSDARG00000060835	-0.843616	2.51003	11.2247	0.00080717	2.10753	2.81308	0.0203471
gene	ENSDARG00000096107	0.714423	2.85081	11.2076	0.000814621	3.14092	2.29996	0.0205172
gene	ENSDARG00000011246	0.659393	2.9882	11.2039	0.00081627	3.46787	2.66673	0.020541
gene	ENSDARG00000063292	-1.84417	-0.471992	11.1886	0.000823002	-1.07443	0.484731	0.0206926
gene	ENSDARG00000059672	1.10716	1.90894	11.1829	0.000825568	2.70248	1.48591	0.0207393
gene	ENSDARG00000032650	0.933022	2.28587	11.1805	0.000826602	2.90929	1.85224	0.0207474
gene	ENSDARG00000098527	2.94488	-1.40245	11.1731	0.000829901	-0.490562	-2.90056	0.0208124
gene	ENSDARG00000031971	-0.945075	2.28297	11.1428	0.000843576	1.80236	2.58058	0.0211372
gene	ENSDARG00000103436	-1.54972	0.970594	11.1338	0.00084771	0.0605581	1.40963	0.0212225
gene	ENSDARG00000037906	0.531057	3.8008	11.1318	0.000848614	4.10802	3.45711	0.021227
gene	ENSDARG00000042984	-1.20169	1.73868	11.13	0.000849421	1.16898	2.20069	0.021229
gene	ENSDARG00000017590	0.521744	4.09555	11.1176	0.00085513	4.70271	4.03088	0.0213534
gene	ENSDARG00000091951	6.67653	-2.32751	11.1143	0.000856645	-1.00087	-4.0452	0.021373
gene	ENSDARG00000032618	3.7934	-1.85206	11.0906	0.000867659	-0.276471	-3.23843	0.0216293
gene	ENSDARG00000035175	-0.69628	5.8086	11.0846	0.000870484	5.81593	6.34883	0.0216812
gene	ENSDARG00000034896	-0.877513	2.46669	11.073	0.000875922	1.74875	2.43777	0.0217981
gene	ENSDARG00000097256	0.525459	3.70574	11.0429	0.00089029	4.2748	3.58689	0.0221368
gene	ENSDARG00000077298	0.804471	2.58439	11.0397	0.000891791	3.01578	2.09083	0.0221552
gene	ENSDARG00000028676	1.72019	0.31561	11.0319	0.000895592	0.856366	-0.91919	0.0222308
gene	ENSDARG00000116546	-6.61136	-2.29881	11.0231	0.000899836	-3.869	-1.23594	0.0223171
gene	ENSDARG00000063475	2.22835	-1.03221	11.0204	0.000901167	0.133859	-1.95811	0.0223312
gene	ENSDARG00000033539	-0.531524	3.67333	11.014	0.000904285	3.56003	3.95193	0.0223753
gene	ENSDARG00000090366	-2.86999	-1.30216	11.0136	0.000904479	-2.77878	-0.773447	0.0223753
gene	ENSDARG00000092687	1.14474	1.81115	11.0083	0.000907071	2.62164	1.35734	0.0224205
gene	ENSDARG00000071670	-0.540299	4.3318	11.0033	0.000909491	4.07005	4.45528	0.0224613
gene	ENSDARG00000029841	0.62548	5.08448	10.9987	0.000911753	5.14067	4.39017	0.0224981
gene	ENSDARG00000094738	2.43726	-1.15124	10.9852	0.000918446	-0.167509	-2.34299	0.022625
gene	ENSDARG00000076462	-6.4583	-2.24063	10.986	0.000918044	-3.869	-1.34634	0.022625
gene	ENSDARG00000038881	-1.37845	1.34357	10.9835	0.000919248	0.64959	1.83396	0.0226257
gene	ENSDARG00000063631	2.08991	-0.64371	10.9814	0.00092033	-0.0909007	-2.04717	0.0226333
gene	ENSDARG00000002831	-0.673145	7.77645	10.9781	0.000921933	7.48969	8.02139	0.0226346
gene	ENSDARG00000112419	-6.53733	-2.27558	10.9794	0.000921321	-3.869	-1.23158	0.0226346
gene	ENSDARG00000099101	-1.50474	1.11895	10.9591	0.000931456	0.05109	1.35154	0.0228492
gene	ENSDARG00000101828	-0.51783	3.94235	10.9501	0.000935979	3.92598	4.29502	0.0229409
gene	ENSDARG00000008100	-1.66954	0.238812	10.9475	0.000937283	-0.487227	0.940233	0.0229536
gene	ENSDARG00000016733	-0.58677	3.22718	10.9387	0.000941738	3.17736	3.64199	0.0230434
gene	ENSDARG00000014522	-2.26165	-0.673495	10.9288	0.00094681	-2.27708	-0.591075	0.0231481
gene	ENSDARG00000054562	1.29681	1.56115	10.9175	0.00095261	1.93563	0.515846	0.0232704
gene	ENSDARG00000017571	0.524215	4.13166	10.9112	0.000955832	4.49187	3.84374	0.0233297
gene	ENSDARG00000045878	-0.578064	3.26223	10.8857	0.000969092	3.2339	3.65623	0.0236335
gene	ENSDARG00000026369	-0.628304	3.1043	10.8825	0.000970777	2.72	3.23108	0.0236549
gene	ENSDARG00000001733	1.18196	1.74082	10.8503	0.00098782	2.38918	1.09073	0.0240501
gene	ENSDARG00000102798	1.82233	0.0370888	10.8422	0.000992117	0.333786	-1.46372	0.0241346
gene	ENSDARG00000076659	2.09766	-0.799168	10.8323	0.000997472	0.0457583	-1.96223	0.0242447
gene	ENSDARG00000102748	3.80944	-1.55529	10.8232	0.00100238	-1.22373	-3.64275	0.0243427
gene	ENSDARG00000025595	0.601581	3.13225	10.8214	0.00100334	3.75502	3.02055	0.0243427
gene	ENSDARG00000077815	0.529255	4.30468	10.8202	0.001004	4.75394	4.09318	0.0243427
gene	ENSDARG00000009844	0.856529	2.46882	10.8155	0.00100656	2.73582	1.74669	0.0243845
gene	ENSDARG00000078797	-1.98899	-0.4899	10.8106	0.0010092	-1.71165	-0.112565	0.0244281
gene	ENSDARG00000003872	-0.717958	2.76436	10.7761	0.0010282	2.59928	3.17684	0.0248675
gene	ENSDARG00000033757	1.77506	0.0647465	10.7661	0.00103375	0.493345	-1.2679	0.0249605
gene	ENSDARG00000054023	1.4982	0.918268	10.7663	0.00103366	1.85206	0.259701	0.0249605
gene	ENSDARG00000116915	1.45115	1.08458	10.7644	0.00103473	1.90124	0.367659	0.0249634
gene	ENSDARG00000030020	-1.03884	2.05378	10.7482	0.00104382	1.47517	2.33277	0.025162
gene	ENSDARG00000070447	-0.8698	2.41779	10.7443	0.00104603	1.92137	2.64903	0.0251944
gene	ENSDARG00000092158	0.519805	3.82947	10.7346	0.00105152	4.15653	3.50086	0.025285
gene	ENSDARG00000103067	-3.17961	-1.45269	10.7347	0.00105145	-3.06929	-0.953522	0.025285
gene	ENSDARG00000092855	1.73042	-0.136283	10.7263	0.00105623	0.715887	-1.0466	0.0253735
gene	ENSDARG00000057159	1.6161	0.283258	10.7251	0.00105694	1.29788	-0.369558	0.0253735
gene	ENSDARG00000093052	-4.63272	-2.02154	10.718	0.00106097	-3.54974	-0.90265	0.0254494
gene	ENSDARG00000073944	-0.623782	3.08226	10.7125	0.00106414	2.82318	3.29927	0.0255045
gene	ENSDARG00000104436	3.69276	-1.70544	10.6985	0.00107224	-0.850611	-3.46148	0.0256775
gene	ENSDARG00000058076	-0.514696	3.84022	10.6957	0.00107386	3.77658	4.15372	0.0256953
gene	ENSDARG00000040649	-0.708435	6.39289	10.6872	0.00107877	6.09273	6.68664	0.0257917
gene	ENSDARG00000099112	-1.57866	0.725059	10.6809	0.00108248	-0.0972659	1.24659	0.0258592
gene	ENSDARG00000040295	-0.535382	9.30732	10.6699	0.00108891	9.32409	9.70196	0.0259914
gene	ENSDARG00000053959	0.587396	3.22634	10.6667	0.00109082	3.55496	2.84753	0.0260061
gene	ENSDARG00000043905	-0.51744	3.9989	10.6653	0.00109164	3.77352	4.16027	0.0260061
gene	ENSDARG00000088798	-0.708703	6.45068	10.6644	0.00109219	6.05697	6.64338	0.0260061
gene	ENSDARG00000105452	-0.74649	2.69605	10.6613	0.00109398	2.3774	2.97552	0.0260274
gene	ENSDARG00000010601	0.700786	7.03097	10.6568	0.00109669	7.63892	6.79496	0.0260708
gene	ENSDARG00000063385	1.64348	0.285325	10.651	0.00110013	1.09407	-0.622543	0.0261284
gene	ENSDARG00000086505	-1.55221	0.640544	10.6497	0.00110091	0.197461	1.55972	0.0261284
gene	ENSDARG00000062478	-0.623482	5.18312	10.6401	0.00110663	4.89195	5.37749	0.026243
gene	ENSDARG00000094098	-5.98325	-2.04078	10.6299	0.00111277	-3.869	-1.76732	0.0263671
gene	ENSDARG00000097155	-1.65608	0.44035	10.608	0.00112596	-0.593322	0.842335	0.0266582
gene	ENSDARG00000063573	-0.608071	5.07107	10.6023	0.00112947	4.83486	5.28735	0.0267185
gene	ENSDARG00000089562	-2.96778	-1.19715	10.6009	0.00113034	-3.05242	-1.13892	0.0267185
gene	ENSDARG00000003320	1.01357	2.05379	10.5915	0.00113607	2.73775	1.58168	0.0268321
gene	ENSDARG00000078281	-0.556045	3.3961	10.5785	0.0011441	3.13705	3.53492	0.0270001
gene	ENSDARG00000052437	-0.692269	6.00474	10.5749	0.00114633	5.81384	6.35379	0.0270178
gene	ENSDARG00000088882	-6.29477	-2.21848	10.5743	0.0011467	-3.869	-1.45729	0.0270178
gene	ENSDARG00000040387	-1.20838	1.64804	10.5697	0.00114958	1.15879	2.1756	0.0270637
gene	ENSDARG00000019160	-0.520372	3.85706	10.5665	0.00115159	3.52341	3.87497	0.0270673
gene	ENSDARG00000063097	-1.70862	-0.184295	10.5665	0.00115157	-0.803452	0.643155	0.0270673
gene	ENSDARG00000067927	1.45149	1.01836	10.5619	0.00115444	1.92928	0.380525	0.0271126
gene	ENSDARG00000071086	-1.69486	0.282544	10.5309	0.00117397	-0.843366	0.599489	0.0275492
gene	ENSDARG00000033662	-0.519331	4.24554	10.5281	0.00117574	4.15215	4.51695	0.0275686
gene	ENSDARG00000059945	-1.33339	1.51887	10.5029	0.00119186	0.168951	1.31571	0.0279242
gene	ENSDARG00000069549	0.803078	2.51309	10.4994	0.00119416	3.13159	2.20752	0.0279555
gene	ENSDARG00000036776	1.50755	0.953215	10.4875	0.00120186	1.47762	-0.117903	0.0281134
gene	ENSDARG00000059121	6.25748	-2.22865	10.4843	0.00120393	-1.35648	-4.0452	0.0281391
gene	ENSDARG00000069085	0.605152	5.07964	10.4802	0.00120663	5.46583	4.71633	0.0281639
gene	ENSDARG00000098991	-1.48102	0.987173	10.4797	0.00120691	0.217666	1.52008	0.0281639
gene	ENSDARG00000041502	0.520563	3.66622	10.4769	0.00120877	4.02514	3.36787	0.0281847
gene	ENSDARG00000038703	-2.85253	-1.28898	10.4732	0.00121119	-2.87898	-0.914491	0.0281961
gene	ENSDARG00000086998	-4.38825	-1.91954	10.4736	0.0012109	-3.54974	-1.14228	0.0281961
gene	ENSDARG00000043241	2.92872	-1.59845	10.4688	0.00121405	-0.0287101	-2.58511	0.0282401
gene	ENSDARG00000058857	0.562082	4.7401	10.4645	0.00121693	5.20246	4.49585	0.0282846
gene	ENSDARG00000100795	-1.72297	0.6275	10.4482	0.00122772	-1.07294	0.385651	0.0285127
gene	ENSDARG00000041923	-1.6383	0.0602816	10.4426	0.00123143	-0.497735	0.879806	0.0285762
gene	ENSDARG00000030326	-0.796329	2.54761	10.4363	0.00123563	2.2006	2.857	0.0286509
gene	ENSDARG00000042329	1.22103	1.66325	10.4311	0.00123911	1.99385	0.642334	0.0286927
gene	ENSDARG00000030844	-1.23515	1.59932	10.43	0.00123982	0.890801	1.96949	0.0286927
gene	ENSDARG00000092290	-1.5464	0.572483	10.4279	0.00124128	0.115024	1.47164	0.0286927
gene	ENSDARG00000040442	-1.84382	-0.369954	10.4277	0.00124136	-1.38894	0.127713	0.0286927
gene	ENSDARG00000019117	2.03278	-0.897532	10.4209	0.00124594	0.233369	-1.72409	0.0287757
gene	ENSDARG00000020488	-0.507567	3.97524	10.4125	0.00125168	3.88176	4.24146	0.0288173
gene	ENSDARG00000078133	-0.548836	3.41544	10.4135	0.001251	3.18074	3.58391	0.0288173
gene	ENSDARG00000034685	-0.603301	3.12718	10.415	0.00124994	2.87636	3.34156	0.0288173
gene	ENSDARG00000107526	-3.90002	-1.54585	10.415	0.00124997	-3.54387	-1.52099	0.0288173
gene	ENSDARG00000070473	0.951486	2.172	10.4041	0.00125735	2.77422	1.71346	0.0289249
gene	ENSDARG00000062319	-1.66651	0.421677	10.394	0.00126425	-0.736476	0.666426	0.0290609
gene	ENSDARG00000098989	2.04465	0.110782	10.3922	0.00126551	-0.391573	-2.25646	0.029067
gene	ENSDARG00000036505	-6.49838	-2.32938	10.389	0.0012677	-3.869	-1.28791	0.0290944
gene	ENSDARG00000034916	0.513002	3.97935	10.3822	0.00127238	4.18542	3.54035	0.029179
gene	ENSDARG00000096012	2.10674	-0.925638	10.3672	0.00128276	0.0270348	-1.94814	0.0293937
gene	ENSDARG00000056338	0.505911	3.96219	10.3524	0.00129304	4.37011	3.7273	0.0295598
gene	ENSDARG00000013561	-0.53205	4.44801	10.3543	0.00129177	4.2264	4.61967	0.0295598
gene	ENSDARG00000061272	-0.663969	2.94704	10.3526	0.00129294	2.43724	2.93533	0.0295598
gene	ENSDARG00000059987	1.29885	1.41401	10.3407	0.00130126	2.11678	0.701281	0.0297246
gene	ENSDARG00000115421	0.658938	2.87881	10.3374	0.00130364	3.50758	2.72797	0.0297556
gene	ENSDARG00000043180	-1.55895	0.655959	10.3354	0.00130501	-0.118947	1.25688	0.0297636
gene	ENSDARG00000044251	1.55563	0.579742	10.3335	0.0013064	1.43531	-0.18389	0.029772
gene	ENSDARG00000099411	-1.39761	1.28826	10.3291	0.00130947	0.204935	1.39905	0.0298188
gene	ENSDARG00000071658	-0.595087	3.17243	10.2915	0.00133645	2.81199	3.25699	0.0304094
gene	ENSDARG00000056874	-0.595367	5.03962	10.2854	0.00134087	4.77361	5.22366	0.0304862
gene	ENSDARG00000022260	0.898657	2.27215	10.2691	0.00135276	2.90243	1.87729	0.0307088
gene	ENSDARG00000097679	-2.0025	-0.676458	10.2695	0.00135247	-1.80884	-0.189776	0.0307088
gene	ENSDARG00000063212	1.69927	-0.300199	10.2634	0.00135694	0.698759	-0.995334	0.0307798
gene	ENSDARG00000029296	-0.853324	2.37192	10.2609	0.00135878	2.20087	2.89154	0.0307976
gene	ENSDARG00000023878	0.529875	4.49256	10.2502	0.00136668	4.96619	4.29724	0.0309527
gene	ENSDARG00000092464	1.7123	-0.333851	10.2486	0.00136788	0.688638	-1.05651	0.0309559
gene	ENSDARG00000056683	-0.9367	2.20709	10.2353	0.00137782	1.76229	2.54799	0.0311566
gene	ENSDARG00000077095	-0.531097	4.48276	10.2218	0.00138787	4.27763	4.67338	0.0313596
gene	ENSDARG00000019001	4.31519	-1.90594	10.2149	0.00139314	-1.06435	-3.7226	0.0314544
gene	ENSDARG00000115299	-1.46658	0.98831	10.2125	0.00139495	0.177587	1.44417	0.0314709
gene	ENSDARG00000115843	1.92059	-0.642603	10.2093	0.00139736	0.0994502	-1.71919	0.0315011
gene	ENSDARG00000098721	-3.4285	-1.7335	10.2075	0.00139867	-3.04272	-0.696991	0.0315062
gene	ENSDARG00000095603	2.18671	-0.99687	10.2041	0.00140127	-0.135894	-2.13658	0.0315318
gene	ENSDARG00000059832	-2.40941	-1.16966	10.2032	0.00140196	-2.28218	-0.427875	0.0315318
gene	ENSDARG00000011764	0.510532	3.68952	10.1994	0.00140486	4.07983	3.44124	0.0315726
gene	ENSDARG00000030824	-0.627673	5.3334	10.1954	0.00140788	5.02782	5.51404	0.0316162
gene	ENSDARG00000071410	1.89021	-0.760705	10.1867	0.00141455	0.408745	-1.46188	0.0317286
gene	ENSDARG00000075608	1.50381	0.707999	10.1861	0.00141506	1.70951	0.103059	0.0317286
gene	ENSDARG00000062521	-0.679139	2.81358	10.1744	0.00142408	2.70443	3.23773	0.0319063
gene	ENSDARG00000044562	-0.508156	4.20286	10.1651	0.00143122	4.08415	4.46644	0.0320419
gene	ENSDARG00000079412	4.60217	-2.06509	10.1614	0.0014341	-0.814348	-3.7226	0.0320817
gene	ENSDARG00000044048	-2.70065	-1.10546	10.1593	0.00143575	-2.86248	-1.04823	0.032094
gene	ENSDARG00000090945	-1.39345	1.17004	10.1539	0.00143993	0.467944	1.67259	0.0321503
gene	ENSDARG00000092364	-1.98028	-0.49107	10.1518	0.00144157	-1.89465	-0.312856	0.0321503
gene	ENSDARG00000039373	-2.01799	-0.759534	10.1529	0.00144074	-1.80423	-0.186886	0.0321503
gene	ENSDARG00000086720	-2.8212	-1.51191	10.1484	0.00144423	-2.52216	-0.397118	0.0321851
gene	ENSDARG00000013794	-0.930421	2.26263	10.1254	0.00146237	1.46106	2.24589	0.0325646
gene	ENSDARG00000001303	-4.0381	-1.96955	10.1228	0.00146447	-3.28925	-0.645439	0.0325863
gene	ENSDARG00000114172	-1.42863	1.17954	10.109	0.00147551	0.0335972	1.26026	0.032807
gene	ENSDARG00000026682	-0.821747	2.47353	10.1016	0.00148138	1.97394	2.6313	0.0329125
gene	ENSDARG00000103283	-6.72097	-2.44709	10.0962	0.00148577	-3.869	-1.12703	0.0329849
gene	ENSDARG00000012945	-0.522587	4.32571	10.0923	0.00148894	3.86012	4.22431	0.0330103
gene	ENSDARG00000070864	-0.749422	2.64387	10.092	0.00148917	2.26807	2.85678	0.0330103
gene	ENSDARG00000113107	-1.8327	-0.625143	10.0872	0.00149299	-1.24705	0.282491	0.0330699
gene	ENSDARG00000114142	1.07429	1.91717	10.0828	0.00149661	2.24273	1.06776	0.033125
gene	ENSDARG00000079161	1.75393	-0.405927	10.0767	0.00150154	0.455518	-1.29142	0.0332089
gene	ENSDARG00000044491	1.68986	0.0072397	10.0672	0.00150936	0.572755	-1.13057	0.0333567
gene	ENSDARG00000089641	1.63293	0.129038	10.0605	0.00151484	0.836295	-0.836631	0.0334525
gene	ENSDARG00000026664	0.501876	4.06538	10.0542	0.00151998	4.39528	3.75703	0.0335152
gene	ENSDARG00000102254	-0.655206	2.8868	10.0555	0.00151893	2.71349	3.23056	0.0335152
gene	ENSDARG00000090071	6.39053	-2.34077	10.0514	0.00152231	-1.25121	-4.0452	0.0335161
gene	ENSDARG00000030604	0.554789	3.32345	10.0522	0.00152169	3.5582	2.90594	0.0335161
gene	ENSDARG00000079753	0.958659	2.11063	10.04	0.00153175	2.78248	1.7166	0.03363
gene	ENSDARG00000061372	-0.543214	4.65781	10.0422	0.00152991	4.46728	4.86765	0.03363
gene	ENSDARG00000019060	-0.548631	4.70277	10.0396	0.00153209	4.48336	4.88463	0.03363
gene	ENSDARG00000035532	-1.45482	0.996908	10.0401	0.00153172	0.166715	1.43532	0.03363
gene	ENSDARG00000059931	-0.758465	2.59961	10.0302	0.00153993	2.30599	2.93079	0.0337768
gene	ENSDARG00000062846	-0.581095	3.15955	10.0254	0.00154396	3.00632	3.43355	0.033819
gene	ENSDARG00000029848	-0.673429	2.87621	10.0251	0.00154417	2.40252	2.89832	0.033819
gene	ENSDARG00000043313	1.29149	1.31776	10.0221	0.00154675	2.36804	0.970814	0.03385
gene	ENSDARG00000020693	0.629188	7.96756	10.0149	0.00155277	8.51029	7.73736	0.0339563
gene	ENSDARG00000053262	-3.56633	-1.06804	10.0132	0.0015542	-3.54387	-1.79662	0.0339622
gene	ENSDARG00000099344	-1.32697	1.32779	10.0028	0.00156302	0.604888	1.72997	0.0341295
gene	ENSDARG00000094316	-4.21004	-1.86907	9.99919	0.00156609	-3.54387	-1.23331	0.034171
gene	ENSDARG00000004174	-0.685117	6.39394	9.99637	0.00156849	6.08091	6.61383	0.0341829
gene	ENSDARG00000069801	-1.49909	1.06345	9.9958	0.00156898	-0.364183	0.90406	0.0341829
gene	ENSDARG00000098514	1.91065	-0.684006	9.98773	0.00157587	0.143441	-1.71245	0.0342977
gene	ENSDARG00000096305	-1.46662	0.970786	9.98688	0.0015766	0.0698897	1.32889	0.0342977
gene	ENSDARG00000058558	-1.52624	0.365732	9.98338	0.0015796	0.0425613	1.37988	0.0343374
gene	ENSDARG00000077468	-1.75554	-0.176949	9.97821	0.00158404	-1.25952	0.212207	0.0344084
gene	ENSDARG00000062003	-0.512314	3.60651	9.97385	0.0015878	3.48805	3.83643	0.0344644
gene	ENSDARG00000074466	-0.660106	5.78297	9.97144	0.00158987	5.48792	5.99985	0.0344838
gene	ENSDARG00000017901	0.655207	5.73232	9.96135	0.0015986	6.25029	5.45068	0.0346475
gene	ENSDARG00000101885	-6.14709	-2.23025	9.95199	0.00160675	-3.869	-1.58568	0.0347983
gene	ENSDARG00000071500	0.525833	4.52639	9.94782	0.0016104	4.95246	4.2938	0.0348514
gene	ENSDARG00000039729	-0.662538	2.83434	9.93971	0.00161751	2.76945	3.29021	0.0349795
gene	ENSDARG00000045015	2.49836	-1.31799	9.93559	0.00162114	-0.270509	-2.45675	0.0350319
gene	ENSDARG00000020602	0.503983	4.21521	9.92736	0.0016284	4.55399	3.90855	0.0351628
gene	ENSDARG00000004169	1.54056	0.607876	9.92065	0.00163434	1.27607	-0.34636	0.0352651
gene	ENSDARG00000038646	2.30206	-1.22566	9.90959	0.0016442	-0.00316404	-2.14299	0.0354516
gene	ENSDARG00000063417	-0.502052	3.72774	9.87799	0.00167268	3.57836	3.93484	0.0360391
gene	ENSDARG00000079269	-2.56032	-1.26045	9.86783	0.00168194	-2.56144	-0.684573	0.0362119
gene	ENSDARG00000076834	1.27122	1.45354	9.86238	0.00168693	1.86666	0.502653	0.0362925
gene	ENSDARG00000042571	0.522035	3.45581	9.85306	0.00169549	3.8965	3.24088	0.0364232
gene	ENSDARG00000020143	0.447499	10.1001	9.85385	0.00169477	10.3762	9.80546	0.0364232
gene	ENSDARG00000111899	1.80739	-0.292919	9.84452	0.00170339	0.125243	-1.66089	0.036539
gene	ENSDARG00000074143	-0.494886	3.92851	9.84489	0.00170304	3.79166	4.15252	0.036539
gene	ENSDARG00000041723	3.88512	-1.6296	9.83294	0.00171414	-1.42737	-3.7226	0.0367427
gene	ENSDARG00000087087	0.58035	8.51779	9.82915	0.00171768	9.11992	8.3935	0.0367916
gene	ENSDARG00000057928	-0.856598	2.34218	9.8274	0.00171931	1.9581	2.66455	0.0367995
gene	ENSDARG00000103542	-2.34173	-1.13786	9.80253	0.00174272	-2.26687	-0.452595	0.0372733
gene	ENSDARG00000096577	3.08309	-1.48056	9.78641	0.00175807	-0.94246	-3.23593	0.0375537
gene	ENSDARG00000113243	1.83662	-0.66221	9.78606	0.0017584	0.281509	-1.51847	0.0375537
gene	ENSDARG00000098369	-2.35489	-1.02235	9.78048	0.00176375	-2.44162	-0.729543	0.0376404
gene	ENSDARG00000008127	-5.55618	-1.86938	9.77355	0.0017704	-3.869	-2.04087	0.0377548
gene	ENSDARG00000087110	-3.66897	-1.36122	9.7695	0.00177431	-3.54387	-1.72507	0.0378105
gene	ENSDARG00000040192	-1.04088	1.92681	9.76431	0.00177932	1.42396	2.28805	0.0378897
gene	ENSDARG00000076043	5.2449	-1.48455	9.75831	0.00178514	-2.14849	-4.0452	0.0379858
gene	ENSDARG00000026166	0.490768	4.03144	9.7558	0.00178758	4.47526	3.84708	0.0380101
gene	ENSDARG00000033899	-0.651416	5.76039	9.75052	0.00179272	5.44457	5.94825	0.0380917
gene	ENSDARG00000008788	6.63356	-2.47406	9.73555	0.00180738	-1.03538	-4.0452	0.0383752
gene	ENSDARG00000038786	-2.22394	-1.0945	9.73034	0.00181251	-2.04467	-0.321067	0.0384562
gene	ENSDARG00000052094	0.751488	2.56448	9.72688	0.00181592	3.22553	2.29843	0.0385007
gene	ENSDARG00000076667	-0.623122	7.92178	9.72446	0.00181832	7.84754	8.34406	0.0385236
gene	ENSDARG00000075831	-1.66042	0.485725	9.72154	0.00182121	-1.00855	0.406684	0.0385569
gene	ENSDARG00000094454	1.60822	0.0163623	9.71541	0.0018273	0.826677	-0.836631	0.0386577
gene	ENSDARG00000052522	0.50568	4.36621	9.70712	0.00183555	4.79788	4.15963	0.0388043
gene	ENSDARG00000067918	0.557566	3.22695	9.6995	0.00184318	3.60394	2.92364	0.0389373
gene	ENSDARG00000078504	1.92509	-0.662136	9.69496	0.00184774	-0.033028	-1.87614	0.0389537
gene	ENSDARG00000004251	1.52972	0.37485	9.69718	0.00184551	1.27757	-0.316014	0.0389537
gene	ENSDARG00000114883	-5.81947	-2.08306	9.69475	0.00184795	-3.869	-1.87715	0.0389537
gene	ENSDARG00000055052	0.520805	4.54102	9.68893	0.00185381	4.95185	4.29194	0.039049
gene	ENSDARG00000106873	-1.34344	1.12876	9.68572	0.00185706	0.837795	1.9953	0.0390892
gene	ENSDARG00000054332	1.37637	0.979294	9.66633	0.00187676	2.14623	0.667642	0.0394755
gene	ENSDARG00000095314	-2.14753	-0.9292	9.65726	0.00188605	-2.09056	-0.404445	0.0396422
gene	ENSDARG00000008433	1.24031	1.43703	9.65187	0.00189159	2.17416	0.808352	0.0397302
gene	ENSDARG00000105691	2.10091	-1.0011	9.63283	0.00191129	-0.079739	-2.04612	0.0401152
gene	ENSDARG00000025436	-0.547865	3.25077	9.6174	0.00192743	3.15934	3.58099	0.0404248
gene	ENSDARG00000026680	0.492195	4.12766	9.60588	0.00193955	4.44659	3.8288	0.04065
gene	ENSDARG00000052876	1.35964	1.07368	9.59951	0.0019463	2.004	0.544055	0.040762
gene	ENSDARG00000063568	2.47231	-1.33443	9.59677	0.00194919	-0.274967	-2.45901	0.0407935
gene	ENSDARG00000063527	-0.489553	4.07916	9.59439	0.00195173	3.95248	4.29879	0.0408173
gene	ENSDARG00000002385	-0.572606	3.13554	9.59014	0.00195625	3.01102	3.43989	0.0408825
gene	ENSDARG00000073786	-0.654038	5.91407	9.5873	0.00195927	5.77375	6.30208	0.0408894
gene	ENSDARG00000107760	-0.812143	2.42126	9.58644	0.00196019	2.0572	2.74047	0.0408894
gene	ENSDARG00000097344	-6.67232	-2.49246	9.5859	0.00196078	-3.869	-1.21306	0.0408894
gene	ENSDARG00000095347	0.799994	2.44421	9.57597	0.0019714	3.00143	1.97697	0.0410524
gene	ENSDARG00000028699	0.662385	2.80966	9.57606	0.00197131	3.30199	2.50898	0.0410524
gene	ENSDARG00000099312	-0.575481	5.06038	9.57173	0.00197596	4.9158	5.34093	0.0410983
gene	ENSDARG00000102178	-0.62399	2.91886	9.57131	0.00197642	2.82371	3.32945	0.0410983
gene	ENSDARG00000042646	0.711597	2.64856	9.56519	0.00198302	3.28392	2.46029	0.0412062
gene	ENSDARG00000101206	-1.73264	-0.320743	9.55326	0.00199594	-1.28025	0.172861	0.0414453
gene	ENSDARG00000061741	1.61096	-0.210693	9.53711	0.00201358	0.79993	-0.878111	0.0417819
gene	ENSDARG00000092608	1.51682	0.452487	9.52445	0.00202753	1.24365	-0.348276	0.0420414
gene	ENSDARG00000087262	-1.31282	1.29098	9.49954	0.00205523	0.468702	1.57797	0.0425855
gene	ENSDARG00000007377	-0.496303	3.90091	9.4965	0.00205864	3.46477	3.81171	0.042626
gene	ENSDARG00000069946	-1.83328	-0.462655	9.49055	0.00206532	-1.62472	-0.0998884	0.0427341
gene	ENSDARG00000102733	2.04357	-1.028	9.4777	0.00207985	0.0903262	-1.8575	0.0430041
gene	ENSDARG00000019969	-0.491644	4.26344	9.47385	0.00208421	4.26613	4.60094	0.0430639
gene	ENSDARG00000071025	6.37884	-2.41365	9.47116	0.00208727	-1.25172	-4.0452	0.0430967
gene	ENSDARG00000009311	-2.34936	-0.977053	9.46525	0.00209401	-2.53502	-0.832054	0.0432052
gene	ENSDARG00000003820	-0.559491	3.18303	9.4616	0.00209818	3.02354	3.43273	0.0432607
gene	ENSDARG00000002487	0.530898	3.32801	9.45774	0.0021026	3.74779	3.08556	0.0433212
gene	ENSDARG00000032575	-0.599982	5.29581	9.45334	0.00210765	5.02262	5.47979	0.0433947
gene	ENSDARG00000043918	1.26843	1.22986	9.43332	0.00213079	2.59731	1.12257	0.0438402
gene	ENSDARG00000101380	-0.21269	12.839	9.42843	0.00213647	12.7457	12.8124	0.0439261
gene	ENSDARG00000093574	3.36821	-1.77047	9.41653	0.00215038	-0.659956	-3.24173	0.0441811
gene	ENSDARG00000077002	0.645516	2.8946	9.41065	0.00215729	3.07332	2.30451	0.044292
gene	ENSDARG00000101139	-0.592405	3.03776	9.40313	0.00216615	2.83801	3.30374	0.0444426
gene	ENSDARG00000037192	1.56546	-0.0415604	9.39868	0.00217142	0.919162	-0.731076	0.0445195
gene	ENSDARG00000005154	1.59314	0.0841688	9.39676	0.00217369	0.716842	-0.91919	0.0445347
gene	ENSDARG00000091280	-5.29106	-1.65942	9.39013	0.00218156	-3.869	-2.23229	0.0446647
gene	ENSDARG00000099014	2.32153	-1.28039	9.38197	0.0021913	-0.136118	-2.23447	0.0448325
gene	ENSDARG00000015524	-0.487689	3.75886	9.37989	0.00219379	3.61056	3.95576	0.0448522
gene	ENSDARG00000078911	-0.4904	3.73967	9.36829	0.00220772	3.52277	3.8695	0.0451054
gene	ENSDARG00000088245	-1.52018	0.18629	9.36155	0.00221585	-0.245836	1.03914	0.0452398
gene	ENSDARG00000025522	-0.491945	4.26571	9.3557	0.00222293	4.11693	4.47303	0.0453527
gene	ENSDARG00000029587	-0.493031	4.30389	9.3531	0.00222609	4.18837	4.55439	0.0453855
gene	ENSDARG00000042725	-2.91809	-1.53202	9.35002	0.00222983	-2.85695	-0.837394	0.0454301
gene	ENSDARG00000058425	-0.480185	3.94366	9.34259	0.00223889	3.86508	4.21	0.0454561
gene	ENSDARG00000071636	-1.86407	-0.664744	9.34304	0.00223833	-1.62472	-0.10834	0.0454561
gene	ENSDARG00000109211	-2.87197	-1.52576	9.34464	0.00223639	-2.80758	-0.777528	0.0454561
gene	ENSDARG00000068460	-2.93266	-1.54292	9.34511	0.00223581	-2.87898	-0.881202	0.0454561
gene	ENSDARG00000103285	-6.21517	-2.34693	9.34685	0.00223369	-3.869	-1.529	0.0454561
gene	ENSDARG00000056753	-0.661859	6.36076	9.33989	0.00224219	5.98032	6.49432	0.0454916
gene	ENSDARG00000018145	-0.513153	3.45573	9.32471	0.00226084	3.24794	3.61805	0.0458381
gene	ENSDARG00000045785	0.774975	2.46719	9.32182	0.00226441	3.04936	2.15299	0.0458787
gene	ENSDARG00000032769	-1.03827	1.88113	9.31715	0.00227019	1.33987	2.19658	0.0459633
gene	ENSDARG00000073688	-1.11989	1.68148	9.31512	0.00227271	1.17767	2.12676	0.0459633
gene	ENSDARG00000044795	-6.60829	-2.50615	9.31463	0.00227331	-3.869	-1.18317	0.0459633
gene	ENSDARG00000026582	0.478425	3.77594	9.31075	0.00227813	4.31223	3.70355	0.046029
gene	ENSDARG00000069464	-1.22127	1.58154	9.30261	0.00228828	0.428513	1.41063	0.0462021
gene	ENSDARG00000115805	1.50952	0.22308	9.29106	0.00230274	1.19609	-0.405604	0.0464299
gene	ENSDARG00000060072	-1.50117	0.521989	9.29135	0.00230238	-0.221894	1.06345	0.0464299
gene	ENSDARG00000037598	0.576468	3.05787	9.27554	0.00232234	3.61575	2.89576	0.0467927
gene	ENSDARG00000092052	2.17685	-0.908054	9.26143	0.0023403	-0.568116	-2.45562	0.0470897
gene	ENSDARG00000011196	0.504687	4.48797	9.26255	0.00233887	4.86679	4.22236	0.0470897
gene	ENSDARG00000044332	0.497401	4.41894	9.25051	0.0023543	4.85299	4.22783	0.0473097
gene	ENSDARG00000022727	-0.633719	5.76555	9.25037	0.00235448	5.61154	6.09514	0.0473097
gene	ENSDARG00000058603	0.577011	3.07997	9.24828	0.00235716	3.45711	2.76312	0.0473312
gene	ENSDARG00000022378	0.585427	2.99921	9.24467	0.00236182	3.68566	2.96013	0.0473921
gene	ENSDARG00000045563	-0.781241	2.44618	9.24209	0.00236515	2.25393	2.87994	0.0474263
gene	ENSDARG00000011855	-1.5404	0.22615	9.23134	0.00237908	-0.51082	0.801669	0.047673
gene	ENSDARG00000079542	-0.580313	3.06757	9.22716	0.00238451	2.87331	3.30621	0.0477491
gene	ENSDARG00000063101	0.824632	2.33506	9.21615	0.0023989	2.93891	1.97163	0.0480043
gene	ENSDARG00000009471	0.866938	2.26594	9.2121	0.00240421	2.60881	1.64589	0.0480776
gene	ENSDARG00000088549	1.37215	1.00312	9.21037	0.00240649	1.72327	0.214175	0.0480902
gene	ENSDARG00000023815	-0.507266	3.55262	9.20444	0.00241428	3.13129	3.49791	0.048213
gene	ENSDARG00000059287	0.485952	3.69626	9.19528	0.0024264	4.02532	3.40372	0.048422
gene	ENSDARG00000093289	5.66551	-2.08507	9.19396	0.00242815	-1.84269	-4.0452	0.0484238
gene	ENSDARG00000089519	0.637057	5.84256	9.19129	0.0024317	6.21418	5.42966	0.0484614
gene	ENSDARG00000077080	0.475838	3.67777	9.18213	0.00244389	4.34673	3.74658	0.0486713
gene	ENSDARG00000022020	0.866131	2.26501	9.16953	0.00246078	2.60708	1.61544	0.0489742
gene	ENSDARG00000014634	-0.482479	4.07434	9.15876	0.0024753	3.80706	4.14865	0.0492296
gene	ENSDARG00000078754	-0.669702	2.74003	9.15178	0.00248476	2.59849	3.11073	0.0493615
gene	ENSDARG00000014910	-1.60852	-0.276595	9.15138	0.00248531	-0.827441	0.510671	0.0493615
gene	ENSDARG00000042621	-0.182898	13.1686	9.14421	0.00249506	12.9974	13.0192	0.0495215
gene	ENSDARG00000078828	1.22954	1.46487	9.11033	0.0025417	1.69566	0.364817	0.050413
gene	ENSDARG00000077083	1.41834	0.832663	9.10867	0.00254401	1.49898	-0.0244395	0.0504246
gene	ENSDARG00000109375	6.46554	-2.49692	9.09728	0.0025599	-1.18056	-4.0452	0.050705
gene	ENSDARG00000025728	2.91262	-1.64308	9.09164	0.00256781	-0.499326	-2.87221	0.0508188
gene	ENSDARG00000032435	-1.19821	1.42928	9.0907	0.00256912	1.0783	2.08939	0.0508188
gene	ENSDARG00000063730	1.35049	1.03106	9.08396	0.00257861	1.76356	0.288962	0.0509721
gene	ENSDARG00000060875	-1.52283	0.480675	9.07952	0.00258488	-0.520635	0.810747	0.0510615
gene	ENSDARG00000044569	-0.654107	2.77072	9.06732	0.00260218	2.69284	3.2028	0.0513684
gene	ENSDARG00000017111	1.34157	1.08719	9.06362	0.00260745	1.67406	0.244064	0.0514376
gene	ENSDARG00000031930	-1.91704	-0.610135	9.05867	0.00261452	-1.91579	-0.409814	0.0515425
gene	ENSDARG00000054319	-6.67161	-2.56288	9.04535	0.00263363	-3.869	-1.19423	0.0518841
gene	ENSDARG00000086327	-2.18963	-1.01351	9.03186	0.00265314	-2.27198	-0.615805	0.0522333
gene	ENSDARG00000102474	-0.48299	3.84546	9.02873	0.00265769	3.45861	3.80547	0.0522875
gene	ENSDARG00000054060	1.20141	1.40464	9.02418	0.00266432	2.2152	0.930897	0.0523475
gene	ENSDARG00000039522	-0.572103	3.15866	9.02479	0.00266342	2.57733	2.99872	0.0523475
gene	ENSDARG00000045423	6.06859	-2.34253	9.01812	0.00267316	-1.52098	-4.0452	0.0524429
gene	ENSDARG00000091947	1.29759	1.15137	9.01644	0.00267562	1.96509	0.556194	0.0524429
gene	ENSDARG00000019774	0.606739	5.52808	9.01594	0.00267635	6.0766	5.32464	0.0524429
gene	ENSDARG00000078331	-6.19381	-2.38395	9.01751	0.00267405	-3.869	-1.59033	0.0524429
gene	ENSDARG00000007244	-0.584767	3.07684	9.00318	0.00269511	2.57868	3.02642	0.052775
gene	ENSDARG00000068822	-0.480203	3.68806	8.9988	0.00270157	3.5921	3.91855	0.0528661
gene	ENSDARG00000103367	0.740074	2.5257	8.98029	0.00272907	3.03767	2.17976	0.0533685
gene	ENSDARG00000060197	-0.474237	3.70982	8.96786	0.0027477	3.72775	4.06001	0.0536968
gene	ENSDARG00000095717	-1.86911	-0.798537	8.96654	0.00274969	-1.61418	-0.106645	0.0536999
gene	ENSDARG00000102008	2.10319	-1.02061	8.96021	0.00275923	-0.334425	-2.23245	0.0538502
gene	ENSDARG00000116052	-2.83654	-1.51089	8.95799	0.00276258	-2.85695	-0.867435	0.0538795
gene	ENSDARG00000098438	-0.500688	3.41997	8.95114	0.00277296	3.40335	3.77049	0.0540459
gene	ENSDARG00000051890	-1.42154	0.870814	8.93389	0.00279927	-0.0574573	1.14414	0.054486
gene	ENSDARG00000054805	-4.74415	-2.25387	8.93444	0.00279843	-3.54387	-0.754696	0.054486
gene	ENSDARG00000109296	-0.601455	5.49237	8.91947	0.00282146	5.32511	5.76269	0.0548448
gene	ENSDARG00000115716	-0.601455	5.49237	8.91947	0.00282146	5.32511	5.76269	0.0548448
gene	ENSDARG00000059461	-0.501121	3.40836	8.90458	0.00284456	3.37864	3.73979	0.0552572
gene	ENSDARG00000010965	0.57558	5.25497	8.89075	0.00286619	5.7452	5.03466	0.0556404
gene	ENSDARG00000063718	0.474172	3.70183	8.86418	0.0029082	4.09723	3.50563	0.0564184
gene	ENSDARG00000036279	-0.525409	4.8121	8.86249	0.0029109	4.71214	5.08465	0.0564333
gene	ENSDARG00000076962	-0.638046	6.11147	8.8577	0.00291855	5.79915	6.29011	0.0565295
gene	ENSDARG00000069295	-1.65043	-0.353413	8.85696	0.00291973	-1.16051	0.205633	0.0565295
gene	ENSDARG00000015611	-1.17359	1.52223	8.84937	0.00293189	0.737471	1.75587	0.0567273
gene	ENSDARG00000031382	-0.635257	7.12432	8.83602	0.00295343	6.83002	7.33302	0.0571062
gene	ENSDARG00000016016	0.610022	7.66678	8.83187	0.00296015	7.88378	7.13791	0.0571983
gene	ENSDARG00000076862	2.97812	-1.16132	8.80604	0.00300234	-1.47982	-3.45893	0.0579752
gene	ENSDARG00000100088	-1.58614	-0.256902	8.8017	0.0030095	-0.905567	0.419157	0.0579985
gene	ENSDARG00000057468	-2.02055	-1.07244	8.80235	0.00300842	-1.76715	-0.133274	0.0579985
gene	ENSDARG00000070126	-3.17956	-1.80123	8.80247	0.00300823	-2.86983	-0.61681	0.0579985
gene	ENSDARG00000003641	-0.470952	3.81604	8.79993	0.00301242	3.64705	3.98193	0.0580163
gene	ENSDARG00000000588	0.463341	3.81919	8.79806	0.00301551	4.36569	3.77234	0.0580376
gene	ENSDARG00000079760	1.57079	-0.26972	8.79456	0.00302129	0.625997	-0.972608	0.0581021
gene	ENSDARG00000101071	-1.41886	0.520197	8.79363	0.00302284	0.180609	1.3971	0.0581021
gene	ENSDARG00000053500	0.473678	3.73409	8.78861	0.00303118	4.05159	3.42167	0.0582241
gene	ENSDARG00000069379	2.48599	-1.3397	8.77141	0.00305989	-0.64296	-2.72085	0.0587371
gene	ENSDARG00000044524	-1.63201	-0.229975	8.7673	0.00306679	-1.19655	0.168744	0.0588308
gene	ENSDARG00000069677	1.44083	0.542206	8.76068	0.00307794	1.29211	-0.240577	0.059006
gene	ENSDARG00000002332	-0.641884	2.7829	8.75796	0.00308253	2.62778	3.12168	0.0590277
gene	ENSDARG00000102823	-5.44264	-1.9803	8.75762	0.00308312	-3.869	-2.13552	0.0590277
gene	ENSDARG00000056191	0.477935	4.32737	8.75161	0.00309329	4.7081	4.10887	0.0591837
gene	ENSDARG00000024488	1.30407	1.13961	8.74497	0.00310458	1.66548	0.260195	0.0593609
gene	ENSDARG00000055229	1.78247	-0.529506	8.74043	0.00311232	-0.0992806	-1.79562	0.0594699
gene	ENSDARG00000103422	0.638761	6.83403	8.72901	0.00313186	7.15904	6.38213	0.0598042
gene	ENSDARG00000070555	-0.632438	2.82686	8.7255	0.00313791	2.56041	3.04201	0.0598805
gene	ENSDARG00000013704	-0.556958	3.09672	8.7089	0.0031666	2.90878	3.3171	0.0603887
gene	ENSDARG00000016391	2.09968	-1.06757	8.70557	0.0031724	-0.309944	-2.24099	0.0604598
gene	ENSDARG00000069744	1.39979	0.365977	8.69224	0.00319568	1.6887	0.205127	0.0608637
gene	ENSDARG00000098113	-1.29347	1.24886	8.68271	0.00321243	0.217369	1.30501	0.0611428
gene	ENSDARG00000079438	-0.616956	5.80228	8.67887	0.00321921	5.48056	5.95565	0.0611923
gene	ENSDARG00000004953	-6.71621	-2.62786	8.67932	0.00321841	-3.869	-1.13127	0.0611923
gene	ENSDARG00000112476	0.511019	3.25376	8.66718	0.00323992	3.91374	3.26341	0.0615458
gene	ENSDARG00000076819	5.9742	-2.35354	8.66496	0.00324388	-1.59152	-4.0452	0.061581
gene	ENSDARG00000055292	-0.591987	2.94339	8.64594	0.00327792	2.76491	3.21862	0.0621464
gene	ENSDARG00000017720	-2.31081	-1.40716	8.64608	0.00327765	-1.9669	-0.143259	0.0621464
gene	ENSDARG00000053559	-2.73979	-1.61946	8.63762	0.00329291	-2.5297	-0.455263	0.0623902
gene	ENSDARG00000059483	0.543209	5.05233	8.62515	0.00331553	5.65359	4.95796	0.0627781
gene	ENSDARG00000002552	-0.677907	2.65528	8.62309	0.00331928	2.52735	3.0531	0.0628084
gene	ENSDARG00000036092	0.45918	3.97815	8.6043	0.00335369	4.41906	3.83165	0.0634185
gene	ENSDARG00000100482	-0.468785	4.12662	8.59953	0.00336249	3.85801	4.18054	0.0635437
gene	ENSDARG00000077740	-1.82838	-0.885228	8.59169	0.003377	-1.45809	0.0193232	0.0637766
gene	ENSDARG00000086179	-6.0895	-2.40177	8.58949	0.00338108	-3.869	-1.69969	0.0638125
gene	ENSDARG00000013582	-0.461121	3.80137	8.58767	0.00338447	3.7874	4.10328	0.0638352
gene	ENSDARG00000004094	-0.626943	6.11405	8.57233	0.00341311	5.95359	6.43442	0.0643338
gene	ENSDARG00000101670	1.95203	-0.975826	8.57091	0.00341577	-0.119035	-1.95605	0.0643425
gene	ENSDARG00000033327	-1.83444	-0.74198	8.55945	0.00343733	-1.70982	-0.268154	0.0647069
gene	ENSDARG00000020219	-0.464517	4.16526	8.54976	0.00345568	4.07364	4.39337	0.0650105
gene	ENSDARG00000063056	0.561033	3.0683	8.54728	0.00346038	3.33747	2.67489	0.0650341
gene	ENSDARG00000016536	-1.62886	-0.395495	8.54675	0.00346139	-1.16854	0.162563	0.0650341
gene	ENSDARG00000104396	-1.07158	1.61908	8.54247	0.00346955	1.61108	2.53518	0.0651455
gene	ENSDARG00000043962	-2.16926	-1.08396	8.53599	0.00348191	-2.2974	-0.646155	0.0653356
gene	ENSDARG00000101752	1.35899	0.916461	8.52577	0.00350152	1.45222	-0.0289177	0.0656614
gene	ENSDARG00000029445	0.466854	4.21861	8.50534	0.00354105	4.51735	3.91977	0.0663215
gene	ENSDARG00000009939	-0.51534	3.33314	8.50523	0.00354126	2.92527	3.30459	0.0663215
gene	ENSDARG00000052154	0.704766	2.57344	8.49739	0.00355657	3.02898	2.1915	0.0665655
gene	ENSDARG00000078888	-0.462132	4.1245	8.48949	0.00357204	4.01234	4.32574	0.0668123
gene	ENSDARG00000012824	1.35086	0.774657	8.48814	0.00357468	1.75523	0.298673	0.0668189
gene	ENSDARG00000105120	-0.502095	3.36574	8.48523	0.0035804	3.12212	3.4849	0.0668831
gene	ENSDARG00000077639	0.553967	3.05393	8.4798	0.00359111	3.53845	2.85836	0.0670402
gene	ENSDARG00000032389	-0.459826	3.60613	8.47636	0.00359791	3.90175	4.2142	0.0671242
gene	ENSDARG00000043884	0.823242	2.25005	8.47428	0.00360203	2.86964	1.91236	0.0671582
gene	ENSDARG00000104100	4.23269	-2.07636	8.46949	0.00361153	-1.11588	-3.72391	0.0672066
gene	ENSDARG00000091592	3.89669	-2.0742	8.47093	0.00360867	-0.659516	-3.46148	0.0672066
gene	ENSDARG00000075164	0.464524	3.70259	8.47024	0.00361005	4.07437	3.46895	0.0672066
gene	ENSDARG00000010918	-0.610126	2.84595	8.46603	0.00361841	2.76056	3.2156	0.0672491
gene	ENSDARG00000008818	-0.627643	2.81833	8.46717	0.00361613	2.51662	2.99705	0.0672491
gene	ENSDARG00000061454	1.37136	0.729336	8.45741	0.0036356	1.52946	0.0569446	0.0674928
gene	ENSDARG00000005023	-0.465722	3.67511	8.45713	0.00363615	3.58886	3.90683	0.0674928
gene	ENSDARG00000101873	-0.900476	2.09268	8.45198	0.00364645	1.59272	2.3528	0.0676411
gene	ENSDARG00000100464	-0.973947	1.92217	8.44856	0.00365332	1.33749	2.16891	0.0677255
gene	ENSDARG00000004539	-0.482105	4.46297	8.44713	0.00365621	4.24718	4.58673	0.0677361
gene	ENSDARG00000035563	-0.634734	2.77994	8.44401	0.00366247	2.57268	3.03286	0.0678092
gene	ENSDARG00000103689	-1.46552	0.158997	8.43682	0.003677	-0.450584	0.787909	0.0679918
gene	ENSDARG00000097743	-3.09319	-1.69545	8.43797	0.00367467	-3.05242	-0.996139	0.0679918
gene	ENSDARG00000089345	-6.05679	-2.41482	8.42722	0.00369645	-3.869	-1.64934	0.0683083
gene	ENSDARG00000101679	0.906854	2.02743	8.42224	0.00370658	2.75274	1.73043	0.0684523
gene	ENSDARG00000052537	-1.22646	1.38828	8.41952	0.00371214	0.298793	1.34224	0.0685117
gene	ENSDARG00000033647	-0.476412	3.50323	8.41525	0.00372088	3.47746	3.80804	0.0686295
gene	ENSDARG00000102200	-1.12045	1.5381	8.41132	0.00372892	1.06153	2.00545	0.0687345
gene	ENSDARG00000019457	-0.540608	3.10558	8.39782	0.0037567	3.02229	3.41282	0.0692029
gene	ENSDARG00000068919	-2.25984	-1.25906	8.39303	0.00376663	-2.27708	-0.590375	0.0693421
gene	ENSDARG00000099144	0.452953	3.87368	8.39078	0.00377129	4.36358	3.76714	0.0693639
gene	ENSDARG00000095830	-2.01434	-1.03474	8.39017	0.00377256	-1.98244	-0.432452	0.0693639
gene	ENSDARG00000042508	0.538187	5.04901	8.37642	0.0038012	5.30749	4.64458	0.0698464
gene	ENSDARG00000105816	1.36463	0.72261	8.37491	0.00380437	1.50674	0.0919156	0.0698608
gene	ENSDARG00000087164	-5.49559	-2.10074	8.37033	0.00381395	-3.869	-2.13313	0.0699928
gene	ENSDARG00000076843	-5.9066	-2.35466	8.35226	0.00385209	-3.869	-1.79761	0.0706482
gene	ENSDARG00000013659	-0.540834	3.09819	8.3479	0.00386133	3.01392	3.40666	0.0707289
gene	ENSDARG00000042690	-0.554665	3.08896	8.34817	0.00386076	2.73243	3.14457	0.0707289
gene	ENSDARG00000060526	-0.47792	4.48476	8.34455	0.00386845	4.43798	4.76251	0.0708149
gene	ENSDARG00000051748	-0.755478	2.43507	8.32917	0.00390134	2.07065	2.65501	0.0713554
gene	ENSDARG00000102445	-1.1184	1.49698	8.32847	0.00390286	1.20615	2.16827	0.0713554
gene	ENSDARG00000104435	0.763593	2.36426	8.32291	0.00391483	3.11153	2.23594	0.0715294
gene	ENSDARG00000058533	1.6315	-0.433639	8.32062	0.00391976	0.204935	-1.39346	0.0715443
gene	ENSDARG00000097693	1.59541	-0.433976	8.32026	0.00392054	0.377658	-1.23936	0.0715443
gene	ENSDARG00000004141	-1.82165	-0.356113	8.31856	0.00392421	-1.93311	-0.555474	0.0715666
gene	ENSDARG00000069954	-0.51335	3.23396	8.31741	0.00392669	3.12116	3.50149	0.0715671
gene	ENSDARG00000054794	1.43028	-0.13152	8.31066	0.00394131	1.16898	-0.348276	0.0717468
gene	ENSDARG00000061590	-0.45476	3.87789	8.31059	0.00394146	3.77587	4.08026	0.0717468
gene	ENSDARG00000060010	1.04775	1.68773	8.3092	0.00394449	2.36377	1.17241	0.0717572
gene	ENSDARG00000092483	1.43791	0.345382	8.29779	0.00396934	1.03576	-0.494026	0.0721645
gene	ENSDARG00000088915	1.73113	-0.676239	8.29266	0.00398057	0.0334351	-1.64767	0.0722337
gene	ENSDARG00000041073	1.4184	0.259299	8.2927	0.00398048	1.19424	-0.317908	0.0722337
gene	ENSDARG00000026834	-1.59573	-0.144349	8.29335	0.00397905	-1.22734	0.0881818	0.0722337
gene	ENSDARG00000077377	1.02683	1.75882	8.28704	0.00399291	2.20491	1.10275	0.0723677
gene	ENSDARG00000062206	-0.499087	4.76215	8.28736	0.00399221	4.97727	5.3073	0.0723677
gene	ENSDARG00000074626	1.39784	0.53634	8.28287	0.00400209	1.30014	-0.182692	0.0724622
gene	ENSDARG00000022995	-0.531903	5.01991	8.28129	0.00400556	4.77298	5.1587	0.0724622
gene	ENSDARG00000055722	-0.606456	5.89488	8.28202	0.00400396	5.84588	6.28879	0.0724622
gene	ENSDARG00000111722	0.655584	2.68133	8.2778	0.00401328	3.18579	2.39607	0.0725569
gene	ENSDARG00000075851	-1.42572	0.33499	8.26968	0.00403127	-0.246674	0.967689	0.072837
gene	ENSDARG00000079467	1.39737	0.387832	8.26395	0.004044	1.31295	-0.161331	0.0730219
gene	ENSDARG00000031683	-2.21672	-1.32388	8.25905	0.00405494	-2.0643	-0.385055	0.0731743
gene	ENSDARG00000036375	-0.62141	6.7264	8.2568	0.00405996	6.85323	7.31287	0.0732196
gene	ENSDARG00000031136	-1.59078	-0.393015	8.25306	0.00406833	-1.11983	0.181692	0.0733254
gene	ENSDARG00000067979	0.635062	2.75156	8.24932	0.00407672	3.15475	2.40115	0.0734309
gene	ENSDARG00000022430	-0.519593	3.21062	8.24821	0.00407922	2.97876	3.37411	0.0734309
gene	ENSDARG00000003281	-0.477156	9.21686	8.23665	0.00410529	9.13764	9.45797	0.0738548
gene	ENSDARG00000027620	1.39597	0.434719	8.23244	0.00411481	1.30006	-0.189883	0.0739515
gene	ENSDARG00000087013	1.35035	0.811515	8.23204	0.00411573	1.45444	-0.000452579	0.0739515
gene	ENSDARG00000062401	-0.587104	2.89477	8.23059	0.00411902	2.81789	3.26788	0.0739651
gene	ENSDARG00000099757	-2.09926	-1.01112	8.2286	0.00412353	-2.27198	-0.72667	0.0740006
gene	ENSDARG00000098463	-5.63129	-2.22359	8.22668	0.0041279	-3.869	-2.00717	0.0740336
gene	ENSDARG00000092172	1.42613	0.536826	8.22256	0.00413727	1.00774	-0.48235	0.0741562
gene	ENSDARG00000087401	1.87714	-0.890952	8.21837	0.00414685	-0.183038	-1.95811	0.0742822
gene	ENSDARG00000078592	0.450256	3.75811	8.21672	0.00415062	4.27624	3.68947	0.0743043
gene	ENSDARG00000043848	-0.460699	4.33354	8.20453	0.0041786	4.39731	4.71327	0.0747296
gene	ENSDARG00000042854	-0.616324	6.95674	8.2036	0.00418074	6.78484	7.25896	0.0747296
gene	ENSDARG00000094603	-3.00628	-1.31727	8.20303	0.00418205	-3.3254	-1.62543	0.0747296
gene	ENSDARG00000069208	0.705059	2.50596	8.19902	0.00419131	3.23034	2.40498	0.0748492
gene	ENSDARG00000030411	-0.391731	10.3101	8.18829	0.00421616	10.0128	10.2506	0.0752469
gene	ENSDARG00000028517	0.49826	3.29686	8.18453	0.00422492	3.69333	3.06027	0.0753102
gene	ENSDARG00000074289	-0.462957	3.90733	8.18345	0.00422743	3.37681	3.71119	0.0753102
gene	ENSDARG00000099583	-1.79986	-0.780045	8.18444	0.00422512	-1.67441	-0.261145	0.0753102
gene	ENSDARG00000079586	-1.6449	-0.482999	8.17248	0.00425308	-1.33548	0.00120955	0.0757209
gene	ENSDARG00000025943	-0.208265	12.7043	8.1711	0.0042563	12.5507	12.616	0.0757321
gene	ENSDARG00000070607	-0.571943	2.94787	8.16083	0.00428049	2.845	3.26129	0.0760708
gene	ENSDARG00000061746	-0.932577	1.96652	8.1608	0.00428054	1.52617	2.30131	0.0760708
gene	ENSDARG00000087762	6.47621	-2.63604	8.15712	0.00428924	-1.17255	-4.0452	0.076179
gene	ENSDARG00000033916	-0.560021	3.00819	8.14579	0.00431612	2.79687	3.20881	0.0766098
gene	ENSDARG00000053875	-0.469659	9.2801	8.13845	0.00433364	8.87471	9.1864	0.076874
gene	ENSDARG00000020482	0.46986	4.4655	8.13699	0.00433711	4.89404	4.2918	0.076889
gene	ENSDARG00000053454	-0.843041	2.18014	8.12977	0.00435443	1.77281	2.46901	0.0771492
gene	ENSDARG00000077220	1.57384	-0.404444	8.12313	0.0043704	0.333072	-1.23423	0.0773852
gene	ENSDARG00000092027	-4.06085	-2.0233	8.12132	0.00437477	-3.54974	-1.4007	0.0774157
gene	ENSDARG00000043279	4.37759	-2.19485	8.11888	0.00438067	-0.987842	-3.72391	0.0774731
gene	ENSDARG00000099560	0.653715	2.67992	8.11709	0.004385	3.08664	2.30678	0.0775028
gene	ENSDARG00000102820	0.769661	2.34245	8.10559	0.00441289	2.8855	2.00718	0.0779486
gene	ENSDARG00000078606	1.01728	1.71013	8.10421	0.00441625	2.51371	1.36551	0.0779608
gene	ENSDARG00000111799	-5.80673	-2.3467	8.09791	0.00443164	-3.869	-1.89313	0.0781852
gene	ENSDARG00000079475	-0.477718	4.52834	8.09545	0.00443765	4.26403	4.60629	0.0782441
gene	ENSDARG00000062664	-1.00646	1.7544	8.08914	0.00445313	1.40819	2.26539	0.0784697
gene	ENSDARG00000053315	5.88577	-2.40863	8.08511	0.00446305	-1.65151	-4.0452	0.078597
gene	ENSDARG00000074806	-0.60151	5.93188	8.08153	0.00447188	5.7317	6.18174	0.0787051
gene	ENSDARG00000105432	2.22312	-1.31584	8.06957	0.00450148	-0.366626	-2.34077	0.0791783
gene	ENSDARG00000067509	6.34528	-2.60315	8.06694	0.00450803	-1.28439	-4.0452	0.0791982
gene	ENSDARG00000097372	-1.42176	0.116023	8.06773	0.00450605	-0.324119	0.858087	0.0791982
gene	ENSDARG00000017121	-0.491501	4.71498	8.06186	0.00452068	4.60278	4.9327	0.0793727
gene	ENSDARG00000076225	-0.459974	3.56925	8.05533	0.00453699	3.54742	3.8517	0.0796112
gene	ENSDARG00000011418	0.45784	3.59197	8.0499	0.00455062	4.02414	3.43083	0.0798025
gene	ENSDARG00000110658	-1.65397	-0.659839	8.04815	0.00455502	-1.23996	0.115202	0.0798317
gene	ENSDARG00000008593	-0.452329	3.78831	8.0467	0.00455865	3.59222	3.90099	0.0798475
gene	ENSDARG00000071211	-0.470597	3.45556	8.04562	0.00456138	3.44493	3.76097	0.0798475
gene	ENSDARG00000003706	-5.95835	-2.43397	8.03945	0.00457694	-3.869	-1.71821	0.0800718
gene	ENSDARG00000109202	-0.475904	3.47598	8.03028	0.00460018	3.23971	3.58852	0.0804303
gene	ENSDARG00000056750	-0.455795	3.64199	8.0278	0.00460647	3.55533	3.8668	0.0804829
gene	ENSDARG00000078042	-0.484485	3.44082	8.02692	0.0046087	3.08421	3.41523	0.0804829
gene	ENSDARG00000054454	-0.445959	3.94828	8.01904	0.00462882	3.85939	4.15775	0.0807859
gene	ENSDARG00000029859	-5.84441	-2.3825	8.00267	0.00467084	-3.869	-1.88019	0.0814706
gene	ENSDARG00000077465	-1.29226	0.973827	7.99666	0.00468637	0.296445	1.37238	0.0816928
gene	ENSDARG00000037392	-0.496505	4.79425	7.988	0.00470883	4.7103	5.07098	0.0819864
gene	ENSDARG00000032126	-1.39549	0.626076	7.98819	0.00470835	-0.338299	0.892266	0.0819864
gene	ENSDARG00000015015	-0.456293	3.64822	7.98513	0.00471632	3.50532	3.81049	0.0820679
gene	ENSDARG00000016649	0.45078	4.25645	7.97723	0.00473693	4.69512	4.1198	0.0823775
gene	ENSDARG00000063270	-0.594143	7.35866	7.97568	0.00474099	7.2719	7.72722	0.0823989
gene	ENSDARG00000077314	1.54383	-0.434259	7.97275	0.00474867	0.41227	-1.13724	0.0824835
gene	ENSDARG00000041205	-0.799749	2.27583	7.96394	0.00477185	1.85996	2.49917	0.0828369
gene	ENSDARG00000086746	-0.610018	6.74226	7.96167	0.00477784	6.84949	7.32346	0.0828916
gene	ENSDARG00000069407	-5.34818	-2.0759	7.9543	0.00479731	-3.869	-2.23991	0.08318
gene	ENSDARG00000086490	0.461212	3.47404	7.94417	0.00482424	4.05823	3.43073	0.083597
gene	ENSDARG00000012823	-0.983182	1.79729	7.94311	0.00482709	1.43611	2.25177	0.083597
gene	ENSDARG00000014015	-0.450837	3.68894	7.93432	0.00485059	3.59805	3.90207	0.0839542
gene	ENSDARG00000055570	-1.06763	1.58443	7.93189	0.00485709	1.14884	2.04742	0.0840171
gene	ENSDARG00000043963	1.25362	0.947281	7.92331	0.00488019	2.00187	0.662992	0.0843167
gene	ENSDARG00000045304	0.489163	3.30378	7.92419	0.00487783	3.71049	3.08164	0.0843167
gene	ENSDARG00000090804	-0.602119	2.82204	7.91893	0.00489201	2.59698	3.05984	0.084471
gene	ENSDARG00000078078	1.16874	1.28469	7.91616	0.00489951	2.05364	0.761424	0.0845505
gene	ENSDARG00000060149	-1.41426	0.399089	7.91243	0.00490963	-0.435358	0.760651	0.0846752
gene	ENSDARG00000095022	-1.41457	0.551158	7.90766	0.00492258	-0.445024	0.676448	0.0848484
gene	ENSDARG00000057353	-1.52633	-0.437512	7.90509	0.00492959	-0.915793	0.369982	0.0849191
gene	ENSDARG00000021753	0.44267	4.06295	7.90115	0.00494033	4.43781	3.8682	0.0850541
gene	ENSDARG00000007743	-1.37344	0.665654	7.89211	0.00496509	-0.185948	0.978651	0.08543
gene	ENSDARG00000016516	0.502945	4.89357	7.88848	0.00497506	5.38629	4.74516	0.0855511
gene	ENSDARG00000078728	5.97942	-2.48573	7.8848	0.0049852	-1.58073	-4.0452	0.0856751
gene	ENSDARG00000003085	0.443621	4.14287	7.88162	0.00499397	4.53969	3.98095	0.0857753
gene	ENSDARG00000051931	-0.448327	4.23439	7.84895	0.00508503	4.14499	4.43909	0.0872368
gene	ENSDARG00000071139	-0.606553	6.4577	7.84965	0.00508305	6.35575	6.80546	0.0872368
gene	ENSDARG00000041107	-6.04472	-2.50482	7.83949	0.00511169	-3.869	-1.72996	0.0876427
gene	ENSDARG00000113383	-5.74882	-2.37033	7.81622	0.00517793	-3.869	-1.86803	0.0887263
gene	ENSDARG00000101210	-1.17107	1.25868	7.80977	0.00519646	0.863761	1.87916	0.0889916
gene	ENSDARG00000068261	-0.465114	4.52457	7.79386	0.0052424	4.47231	4.78701	0.0897258
gene	ENSDARG00000098758	-1.78905	-0.783936	7.79106	0.00525055	-1.76754	-0.385405	0.0898127
gene	ENSDARG00000078983	0.450536	3.55242	7.78924	0.00525582	4.07969	3.50166	0.0898501
gene	ENSDARG00000070391	-0.794488	2.30524	7.78733	0.00526139	1.62972	2.29319	0.0898929
gene	ENSDARG00000052426	0.731341	2.40907	7.78097	0.00527995	2.91288	2.04817	0.0901045
[truncated: 8,289 more rows]

## Sheet: WT vs abanrf2 double mutant
	ID		logFC	logCPM	LR	PValue	Test_logCPM	control_logCPM	FDR
[truncated: 10,000 more rows]

## Sheet: abaKO vs abanrf2 double mutant
	logFC	logCPM	LR	PValue	FDR
[truncated: 663 more rows]
