# Supplementary material for: Interplay between Nrf2 and αB-crystallin in the lens and heart of zebrafish under proteostatic stress
Source: Front Mol Biosci. 2023 Jul 28;10:1185704. doi: 10.3389/fmolb.2023.1185704 (PMC10422029; doi:10.3389/fmolb.2023.1185704)
Supplement: Supplementary file 3 [file DataSheet2.XLSX]

## Sheet: Heart_RNAseq_cpm
	control_WT	control_WT.1	comparison_aba	comparison_aba.1	comparison_nrf2	comparison_nrf2.1	comparison_aba_nrf2	comparison_aba_nrf2.1
actr3	14.014	7.01	11.017	9.01	3.003	9.011	4.004	5.002
lcp1	4.004	1.001	1.002	5.006	1.001	0	2.002	0
cnot11	0	0	1.002	1.001	0	1.001	0	0
rpl31	81.08	72.101	45.07	65.072	67.073	68.082	64.071	48.022
fancb	0	0	0	0	0	0	0	0
gpm6bb	1.001	1.001	0	0	0	0	0	0
ofd1	0	0	1.002	0	1.001	0	1.001	0
pcdh8	0	0	0	0	0	0	0	0
mir18b	0	0	0	0	0	0	0	0
sox21b	0	0	0	0	0	0	0	0
tank	0	0	0	1.001	0	0	0	0
ifih1	2.002	0	1.002	0	0	0	1.001	2.001
fign	0	0	0	0	0	0	0	0
dhrs9	1.001	0	0	0	0	0	0	0
lrp2a	2.002	0	0	0	0	1.001	0	2.001
col28a2a	0	0	0	0	0	0	0	0
fastkd1	0	0	0	0	1.001	0	0	1
phgdh	0	0	0	0	0	0	0	0
arpc2	7.007	8.011	5.008	9.01	7.008	6.007	8.009	5.002
zgc:92380	0	0	0	0	0	0	0	1
igfbp5b	5.005	2.003	4.006	2.002	5.005	2.002	2.002	5.002
igfbp2b	1.001	0	0	0	0	0	0	0
cx43.4	0	0	1.002	0	0	1.001	1.001	0
slc4a3	0	0	0	0	0	0	0	0
asb1	0	0	0	0	0	0	0	0
traf3ip1	1.001	0	0	1.001	0	0	0	0
zgc:66484	0	0	0	0	1.001	0	0	1
neurod1	0	0	0	0	0	0	0	0
znf385b	0	0	0	0	0	0	0	0
sestd1	0	1.001	0	2.002	0	0	1.001	2.001
gulp1a	1.001	0	1.002	2.002	1.001	0	0	1
tfpia	6.006	7.01	12.019	15.017	5.005	5.006	7.008	10.005
calcrla	0	0	0	0	0	0	0	1
pcbp3	0	0	0	0	0	0	0	0
mfsd6b	0	0	0	0	0	0	0	0
stat4	1.001	1.001	2.003	4.004	1.001	2.002	0	2.001
slc40a1	11.011	1.001	3.005	2.002	5.005	0	3.003	7.003
asnsd1	2.002	2.003	0	2.002	1.001	2.002	1.001	3.001
adat3	0	0	0	0	0	0	0	0
pms1	0	0	0	0	0	0	0	0
mstnb	0	0	1.002	0	1.001	0	0	0
heg1	3.003	3.004	0	8.009	3.003	2.002	2.002	10.005
slc12a8	0	0	0	0	0	0	0	1
snx4	3.003	1.001	0	1.001	1.001	1.001	2.002	1
lss	0	0	0	0	0	0	0	0
bcs1l	1.001	0	0	0	0	0	1.001	2.001
ccdc93	1.001	0	0	0	1.001	0	2.002	0
tfcp2l1	1.001	0	0	0	0	0	0	0
stam2	1.001	3.004	1.002	1.001	3.003	2.002	2.002	1
dirc2	1.001	0	1.002	0	1.001	1.001	0	0
slc15a2	0	1.001	0	0	0	0	0	0
ralba	9.009	15.021	5.008	5.006	6.007	5.006	10.011	9.004
atp1a1b	0	0	0	0	2.002	0	0	0
mab21l3	0	0	0	0	0	0	0	0
dnajc28	0	2.003	0	2.002	0	1.001	0	0
rcan1a	2.002	1.001	2.003	3.003	2.002	4.005	1.001	0
si:dkey-67c22.2	7.007	6.008	5.008	2.002	4.004	2.002	3.003	6.003
cdc16	0	1.001	1.002	0	0	1.001	0	4.002
upf3a	0	0	0	1.001	0	0	0	0
shox	0	0	0	0	0	0	0	0
med14	1.001	1.001	0	1.001	0	1.001	0	0
ildr2	0	0	1.002	0	1.001	0	1.001	0
nxpe3	0	2.003	0	1.001	0	0	0	0
dcaf6	7.007	1.001	5.008	1.001	1.001	3.004	5.006	5.002
efhc2	0	0	0	0	0	0	0	0
atp5po	93.092	62.087	73.114	84.093	61.066	78.094	56.062	64.029
si:ch211-125e6.8	0	0	0	0	1.001	0	0	0
vangl1	0	0	0	0	0	0	1.001	0
nhlh2	0	0	0	0	0	0	0	0
mxe	2.002	3.004	1.002	0	1.001	0	2.002	1
gatd3a	7.007	3.004	4.006	4.004	2.002	5.006	2.002	2.001
olig1	0	0	0	0	0	0	0	0
gzm3	0	0	1.002	0	0	0	0	0
dnajb11	2.002	0	0	2.002	0	0	0	0
satb2	0	0	0	0	0	0	0	0
rftn2	0	1.001	2.003	1.001	0	0	0	2.001
pikfyve	2.002	0	3.005	2.002	1.001	2.002	1.001	0
gpr183a	0	0	0	0	0	0	0	0
klf12b	0	0	0	0	0	0	0	0
gja5a	2.002	2.003	1.002	2.002	1.001	1.001	2.002	0
piga	0	0	0	0	0	0	0	0
asb11	0	0	0	0	0	0	0	0
srpx	1.001	1.001	0	0	1.001	0	0	2.001
tfg	1.001	1.001	2.003	4.004	2.002	1.001	1.001	2.001
jagn1a	0	0	0	0	0	0	0	0
mir16c	0	0	0	0	0	0	0	0
spryd7b	0	0	0	0	2.002	1.001	1.001	0
creb1b	0	0	0	0	0	0	0	0
ccnyl1	0	3.004	0	1.001	1.001	1.001	0	1
fzd5	0	0	0	0	0	1.001	0	0
idh1	1.001	2.003	3.005	4.004	1.001	7.008	0	0
dbr1	1.001	1.001	1.002	0	1.001	2.002	0	0
cyp27a1.4	0	0	0	0	0	1.001	0	0
rab5b	0	2.003	1.002	0	2.002	0	0	3.001
gtf2e1	1.001	1.001	0	1.001	1.001	0	0	0
stxbp5l	0	0	0	0	0	0	0	0
kdelc1	0	1.001	0	2.002	1.001	0	0	1
nepro	0	1.001	0	0	0	1.001	0	0
si:rp71-84d19.3	0	0	1.002	0	1.001	0	1.001	1
gtdc1	0	0	0	1.001	0	1.001	0	0
zeb2a	8.008	2.003	6.009	12.013	7.008	3.004	5.006	10.005
acvr2aa	1.001	1.001	2.003	1.001	4.004	0	2.002	1
itm2bb	10.01	11.015	4.006	7.008	8.009	3.004	6.007	7.003
esd	1.001	2.003	2.003	4.004	1.001	2.002	2.002	3.001
zgc:153901	0	1.001	1.002	0	0	0	0	1
maip1	2.002	0	2.003	0	0	0	0	1
rpe	0	0	2.003	1.001	2.002	1.001	0	1
esyt3	0	0	0	0	0	0	0	0
si:ch211-219a4.3	3.003	3.004	1.002	4.004	1.001	1.001	2.002	1
ndufa10	15.015	8.011	10.016	16.018	3.003	5.006	6.007	7.003
sh3bp4	0	2.003	1.002	0	0	1.001	0	0
tmem163a	0	0	0	0	0	0	0	0
ccnt2a	2.002	0	0	3.003	1.001	1.001	2.002	0
mmadhc	6.006	7.01	5.008	3.003	1.001	3.004	3.003	3.001
rnd3b	0	2.003	3.005	3.003	2.002	1.001	1.001	3.001
si:dkey-91i10.3	0	0	1.002	0	0	0	0	0
rif1	2.002	2.003	0	0	0	2.002	3.003	1
si:dkey-189g17.2	0	0	0	0	0	0	0	0
crygm3	0	0	0	0	0	0	0	0
crygm2d1	0	0	0	0	0	0	0	0
crygm2d10	0	0	0	0	0	0	0	0
crygm2d21	0	0	0	0	0	0	0	0
crygm2d7	0	0	0	0	0	0	0	0
crygm2d20	0	0	0	0	0	0	0	0
crygm2d12	0	0	0	0	0	0	0	0
crygm2d16	0	0	0	0	0	0	0	0
zgc:173645	0	0	0	0	0	0	0	0
crygm2d8	0	0	0	0	0	0	0	0
crygm2d17	0	0	0	0	0	0	0	0
zgc:173452	0	0	0	0	0	0	0	0
crygmxl1	0	0	0	0	0	0	0	0
crygm7	0	0	0	0	0	0	0	0
si:dkey-57a22.11	0	0	0	0	0	0	0	0
uchl3	0	2.003	2.003	1.001	0	1.001	1.001	0
arhgef7a	0	0	0	0	0	0	0	0
gja3	2.002	1.001	0	0	3.003	2.002	1.001	0
cx30.3	0	0	0	0	0	0	0	0
cryl1	2.002	1.001	0	0	0	3.004	1.001	1
lats2	1.001	0	0	0	3.003	5.006	2.002	4.002
sap18	3.003	0	3.005	2.002	1.001	2.002	1.001	1
popdc2	40.755	60.557	31.205	21.782	33.892	36.683	34.898	45.021
pla1a	1.287	3.533	2.848	1.244	1.147	1.362	1.142	0
hao2	0	0	0	0	0	0	0	0
crfb1	1.001	0	0	1.001	0	1.001	0	1
kctd4	0	0	0	0	0	0	0	0
tsc22d1	0	0	1.002	0	5.005	4.005	2.002	1
vwa8	2.002	1.001	0	0	2.002	0	2.002	0
rgcc	2.002	3.004	2.003	1.001	1.001	3.004	1.001	0
zgc:101559	0	0	0	0	1.001	0	1.001	0
scel	0	0	0	0	0	0	0	0
mycbp2	5.005	5.007	2.003	6.007	6.007	6.007	5.006	6.003
fbxl3a	1.001	0	1.002	2.002	0	3.004	1.001	2.001
prkag3b	0	0	0	0	0	0	1.001	0
bmpr2b	1.001	0	1.002	0	1.001	2.002	0	0
tra2b	0	0	0	0	1.001	0	1.001	0
tmem41aa	0	1.001	0	0	0	1.001	2.002	0
nup35	0	0	0	0	1.001	0	0	0
gli2a	0	0	0	0	0	1.001	1.001	0
znf804a	0	0	0	0	0	0	0	0
itgav	5.005	0	4.006	7.008	3.003	1.001	3.003	2.001
cryba2b	0	0	0	0	0	0	0	0
mir1788	0	0	0	0	0	0	0	0
gmppaa	3.003	1.001	1.002	2.002	2.002	3.004	2.002	2.001
dars	13.013	15.021	6.009	14.015	12.013	7.008	5.006	21.01
ugt1a7	0	0	0	0	0	0	0	0
ugt1a6	0	0	0	0	0	0	0	0
ugt1a2	0	0	0	0	0	0	0	0
ugt1a1	0	0	0	0	0	0	0	0
fstl1b	2.002	1.001	3.005	4.004	1.001	4.005	1.001	2.001
zgc:113337	0	0	0	0	0	0	0	0
sik1	3.003	2.003	2.003	1.001	1.001	0	2.002	1
ankrd10b	1.001	0	0	0	0	0	0	0
zgc:153499	0	0	0	0	0	0	0	0
si:ch1073-75o15.3	0	0	0	0	0	0	0	0
mnx2a	0	0	0	0	0	0	0	0
si:ch73-199e17.1	0	0	1.002	0	0	0	0	0
tuba8l3	3.003	4.006	2.003	2.002	0	3.004	8.009	7.003
mir153c	0	0	0	0	0	0	0	0
desma	60.059	64.09	80.125	61.068	63.069	47.057	48.053	43.02
creg2	4.004	6.008	7.011	4.004	1.001	2.002	2.002	5.002
inpp4aa	0	1.001	1.002	1.001	1.001	1.001	0	2.001
slc9a2	0	0	0	0	0	0	0	0
fhl2a	8.008	8.011	5.008	2.002	4.004	5.006	3.003	2.001
nck2a	0	0	0	0	0	2.002	0	0
st6gal2a	0	0	0	0	0	0	0	0
nr4a2a	0	0	0	0	0	0	0	0
sp5a	0	0	0	0	0	0	0	0
mettl8	0	0	0	0	0	0	0	0
dync1i2a	2.002	6.009	0	0	1.001	1.001	2.002	1
zak	0	0	0	0	0	0	1.001	0
cdca7a	1.001	0	0	0	0	0	0	0
sp9	0	0	0	0	0	0	0	0
scrn3	6.006	2.003	0	1.001	3.003	1.001	2.002	2.001
evx2	0	0	0	0	0	0	0	0
hoxd13a	0	0	0	0	0	0	0	0
hoxd12a	0	0	0	0	0	0	0	0
hoxd9a	0	0	0	0	0	0	0	0
mir10b-1	0	0	0	0	0	0	0	0
hoxd4a	0	0	0	0	0	0	0	0
hnrnpa3	0	0	0	0	0	0	0	1
nfe2l2a	0	4.006	2.003	2.002	4.004	2.002	4.004	0
si:ch211-222f23.6	0	0	0	0	0	0	0	0
rbm45	0	1.001	0	0	0	0	0	0
ndufb3	5.005	6.008	9.014	6.007	7.008	3.004	10.011	7.003
zgc:158619	0	1.001	0	0	0	0	0	0
map3k12	0	0	0	0	0	0	0	0
zgc:158320	0	0	0	0	0	0	0	0
bzw1b	2.002	2.003	5.008	2.002	0	1.001	1.001	1
tlr9	0	0	0	0	0	0	0	0
selenok	2.002	1.001	0	4.004	1.001	1.001	3.003	2.001
mir181a-2	0	0	0	0	0	0	0	0
nadka	1.001	0	0	0	0	0	0	0
mrps25	2.002	1.001	2.003	3.003	2.002	1.001	0	1
sult1st4	0	0	0	0	0	0	0	0
cyr61l2	0	3.004	3.005	1.001	6.007	8.01	4.004	3.001
nr5a1a	0	0	0	0	0	0	0	0
nr6a1a	0	0	0	0	0	0	0	0
zgc:77112	1.001	0	0	0	0	0	0	0
arid5a	1.001	0	0	0	0	0	0	0
ube2d4	0	1.001	0	0	1.001	0	0	0
tubb2b	1.001	2.003	1.002	1.001	0	0	1.001	0
tcf7l1b	0	0	0	1.001	2.002	0	0	0
vps13a	5.005	2.003	2.003	3.003	7.008	2.002	3.003	2.001
tbx16	0	0	0	0	0	0	0	0
npy8br	0	0	0	0	0	0	0	0
ankrd39	0	0	0	0	0	0	0	0
fgfr1a	0	0	0	0	1.001	0	0	0
lgi3	0	0	0	0	0	0	0	0
zgc:56596	0	2.003	0	0	0	1.001	0	0
egr3	0	0	0	0	0	0	0	0
slc25a37	0	0	0	0	0	3.004	0	0
stc1	0	0	0	0	0	0	0	0
ido1	0	0	0	0	0	0	0	0
naa35	0	3.004	0	1.001	0	3.004	1.001	1
agtpbp1	0	0	0	0	2.002	0	1.001	0
zgc:136564	2.002	0	0	0	0	0	0	0
fkbp1aa	4.004	8.011	5.008	7.007	6.006	6.007	9.01	12.005
zgc:56525	2.002	4.006	1.002	1.001	4.004	1.001	3.003	3.001
zgc:195023	0	0	0	0	0	0	0	0
ndufa7	4.004	1.001	6.009	4.004	4.004	8.01	8.009	2.001
dpp9	4.004	1.001	1.002	1.001	3.003	1.001	5.006	1
arhgef16	0	0	0	0	0	0	0	0
espn	0	0	0	0	0	0	0	0
hes2.1	0	0	0	0	0	0	0	0
tas1r2.2	0	0	0	0	0	0	0	0
kctd9a	0	0	0	0	0	0	0	0
ogg1	0	0	0	0	1.001	0	0	0
ube2al	3.003	2.003	2.003	2.002	0	0	2.002	2.001
si:dkey-75a21.2	2.002	0	1.002	2.002	1.001	0	0	1
fam160b2	0	0	0	2.002	2.002	2.002	3.003	0
nudt18	1.001	0	2.003	0	0	0	0	0
adam9	0	0	1.002	1.001	1.001	0	1.001	0
ywhabb	9.009	9.013	12.019	4.004	8.009	8.01	4.004	7.003
chmp4bb	5.005	0	1.002	2.002	5.005	6.007	6.007	2.001
pabpc1l	0	0	0	0	0	0	0	0
mhc1laa	0	1.001	0	0	0	0	0	0
lsm1	1.001	0	1.002	1.001	0	0	0	0
ulk1a	4.004	4.006	1.002	2.002	3.003	3.004	1.001	4.002
si:busm1-37i06.4	0	0	0	0	0	0	0	0
si:busm1-228j01.6	0	0	0	0	0	0	0	0
ncor2	10.01	2.003	5.008	3.003	1.001	1.001	6.007	2.001
rflna	1.001	0	0	0	0	0	0	0
ccdc92	0	0	0	0	0	0	0	0
prnpa	0	0	0	0	0	0	0	0
zgc:194007	0	0	0	0	0	0	0	0
kazald3	3.003	0	2.003	5.006	0	2.002	1.001	0
gfra2a	0	0	0	0	0	0	0	0
si:ch211-158d24.4	0	0	0	0	0	0	1.001	0
golga1	1.001	2.003	1.002	0	2.002	1.001	0	0
olfml2a	1.001	2.003	0	1.001	1.001	3.004	1.001	0
plxnd1	1.001	4.006	5.008	5.006	6.007	2.002	7.008	9.004
pop5	0	2.003	1.002	0	1.001	0	2.002	0
fahd2a	0	0	1.002	0	0	0	1.001	1
gck	0	0	0	0	1.001	0	0	0
rnf34a	2.002	0	0	0	1.001	1.001	0	0
ggt1a	0	0	0	0	0	0	0	0
ggt5a	0	0	0	0	0	0	0	0
asphd2	1.001	1.001	2.003	0	0	0	0	1
zgc:162025	0	0	1.002	0	0	0	0	0
hnf1a	0	0	0	0	0	0	0	0
si:ch211-170d8.2	0	0	0	0	0	0	0	0
mpc2	6.006	7.01	15.023	8.009	3.003	10.012	6.007	12.005
si:ch211-170d8.5	0	0	0	0	0	0	0	0
prkab1b	7.007	6.008	11.017	4.004	6.007	3.004	4.004	7.003
pcsk5b	0	1.001	0	0	2.002	0	0	2.001
wdr3	2.002	1.001	0	1.001	1.001	2.002	1.001	1
inpp5l	0	0	1.002	1.001	0	0	0	0
nkx6.3	0	0	0	0	0	0	0	0
pdlim2	0	1.001	0	0	2.002	0	0	0
npm2a	0	0	0	0	0	0	0	0
mapkapk2b	0	0	0	0	0	0	0	0
eif2d	2.002	0	3.005	2.002	3.003	2.002	1.001	0
slc12a5b	0	0	0	0	0	0	0	0
zgc:162200	0	2.003	0	1.001	1.001	1.001	1.001	0
renbp	0	0	0	0	0	0	0	0
kdm5c	2.002	3.004	6.009	4.004	3.003	2.002	3.003	1
slc7a4	0	0	0	0	0	0	0	0
si:busm1-160c18.6	0	0	0	0	0	0	0	0
mhc2b	0	0	0	2.002	2.002	0	3.003	1
si:busm1-194e12.11	2.002	0	0	0	0	0	0	0
LOC100006889	0	0	0	0	0	0	0	0
lmx1bb	0	0	0	0	0	0	0	0
si:dkey-191c17.2	0	0	0	0	0	0	0	0
mthfd2l	0	0	0	0	0	0	0	0
ipo11	1.001	0	1.002	0	0	0	0	0
oxct1a	0	0	0	0	0	0	0	0
selenop	23.023	23.032	20.031	28.031	24.026	34.041	70.077	57.026
znf131	1.001	0	2.003	0	0	0	0	2.001
sp3a	1.001	0	0	0	0	0	1.001	0
creb3l3l	7.007	4.006	1.002	6.007	2.002	2.002	1.001	8.004
odf2b	0	0	0	0	0	0	0	0
si:ch211-251j10.3	1.001	1.001	0	3.003	0	0	0	0
derl3	1.001	0	1.002	2.002	2.002	0	0	1
tas2r200.2	0	0	0	0	0	0	0	0
p2rx4b	0	0	0	0	0	0	0	0
upb1	0	0	0	0	0	0	0	0
adora2aa	1.001	0	0	0	4.004	0	1.001	1
pgm5	0	1.001	0	0	0	0	0	0
mir24-3	0	0	0	0	0	0	0	0
fancc	1.001	0	0	0	0	0	0	0
ptch1	0	1.001	0	1.001	1.001	0	0	0
ercc6l2	0	1.001	0	1.001	2.002	0	0	0
hsd17b3	0	0	0	0	2.002	0	1.001	1
mapk4	2.002	1.001	0	0	0	1.001	1.001	1
mpeg1.1	2.002	1.001	0	0	0	0	0	1
mpeg1.3	0	0	0	0	0	0	0	0
atoh1a	0	0	0	0	0	0	0	0
slc52a3	0	3.004	1.002	0	1.001	1.001	0	0
si:ch211-125e6.14	0	0	0	0	0	0	0	0
tmem189	0	1.001	0	2.002	0	1.001	0	0
cebpb	1.001	0	0	0	0	1.001	1.001	0
klhl12	2.002	2.003	1.002	0	1.001	0	0	0
rap1aa	3.003	3.004	1.002	2.002	4.004	0	1.001	2.001
cttnbp2nlb	2.002	0	0	0	1.001	2.002	0	1
sema3b	1.001	0	0	0	0	0	1.001	0
vgll4l	0	0	0	0	0	0	0	0
amt	0	0	2.003	1.001	0	0	0	0
mgll	2.002	1.001	1.002	1.001	0	0	0	0
dalrd3	0	1.001	0	0	2.002	0	0	2.001
arih2	3.003	4.006	2.003	5.006	4.004	3.004	2.002	2.001
sema3h	0	0	0	0	0	0	0	0
tmem9	1.001	1.001	0	0	1.001	0	0	1
foxp3a	0	0	0	0	0	0	0	0
dnase1l1l	0	0	0	0	0	0	0	0
atp5pb	70.069	66.093	79.123	72.08	65.071	61.074	45.05	75.034
eps8l3b	0	0	0	0	0	0	0	0
gnai3	0	0	0	0	0	1.001	0	0
nfyal	1.001	0	0	0	0	0	0	0
slc6a17	0	0	0	0	0	0	0	0
slc16a4	0	0	0	0	0	0	0	0
mmp9	0	0	0	0	0	0	0	0
dclre1b	1.001	0	1.002	0	1.001	0	1.001	0
cpne5a	0	0	0	0	0	0	0	0
srpk1a	3.003	1.001	1.002	4.004	2.002	6.007	2.002	1
si:ch211-163l21.7	0	0	0	0	0	0	0	0
si:ch73-237c6.1	1.737	0	1.506	1.001	1.889	1.892	2.862	1
nt5dc2	4.004	1.001	2.003	2.002	2.002	1.001	1.001	1
slc38a5b	4.004	2.003	4.006	0	0	4.005	3.003	3.001
mapre1a	1.001	1.001	1.002	1.001	0	0	0	0
dnajc5aa	0	0	0	0	0	0	0	0
zgc:136605	0	0	0	0	0	0	0	0
csde1	26.026	21.03	25.039	17.019	16.017	28.034	30.033	18.008
si:ch211-147a11.3	1.001	0	0	2.002	0	0	0	1
dffb	0	1.001	1.002	0	1.001	0	0	0
ela2	0	0	0	0	1.001	1.001	0	0
cry1ba	6.006	4.006	6.009	5.006	10.011	9.011	8.009	7.003
col2a1a	0	0	0	0	0	0	0	0
uck2a	1.001	1.001	1.002	0	1.001	1.001	0	2.001
zgc:112962	2.002	3.004	2.003	1.001	2.002	2.002	1.001	0
si:ch73-196i15.3	0	0	0	0	0	0	0	0
dohh	7.007	6.008	1.002	4.004	2.002	2.002	3.003	1
si:ch211-133l5.7	0	0	0	0	0	0	0	0
zgc:101100	0	0	0	0	0	0	0	0
rexo1	1.001	0	0	0	1.001	2.002	0	1
mknk2b	12.012	13.018	8.012	10.011	16.017	13.016	11.012	20.009
adamts10	0	1.001	0	0	0	0	1.001	0
myo1f	1.001	0	0	2.002	0	0	0	2.001
acer1	0	0	0	0	0	0	0	0
rfx2	1.001	1.001	0	1.001	0	0	0	2.001
notch2	5.005	2.003	3.005	3.003	3.003	3.004	5.006	5.002
colgalt2	0	0	0	0	0	0	0	0
rgl1	1.001	4.006	2.003	2.002	1.001	0	5.006	4.002
sh3gl1b	6.006	0	0	2.002	1.001	2.002	0	1
stap2b	0	0	0	0	0	0	0	0
tab3	0	0	0	1.001	1.001	0	0	0
ssbp3b	2.002	1.001	1.002	0	1.001	0	1.001	0
fpgt	0	0	0	0	0	0	0	0
tnni3k	1.001	1.001	2.003	3.003	6.007	4.005	5.006	4.002
st6galnac5b	2.002	2.003	0	1.001	1.001	0	1.001	0
prkcz	0	0	0	0	0	1.001	0	0
crfb2	0	0	0	1.001	0	0	0	1
skia	2.002	0	7.011	3.003	3.003	2.002	6.007	5.002
dimt1l	0	0	0	0	1.001	0	0	2.001
pola2	0	0	0	0	0	2.002	0	0
cenph	0	0	0	0	0	0	0	0
mrps36	3.003	8.011	3.005	8.009	7.008	9.011	9.01	7.003
elovl7a	0	0	0	0	0	0	0	0
lamp1b	0	0	1.002	4.004	1.001	0	1.001	2.001
ercc8	0	0	0	0	0	0	0	2.001
rpe65b	0	0	0	0	0	0	0	0
rnf11b	0	3.004	1.002	1.001	0	1.001	1.001	0
faf1	2.002	3.004	2.003	4.004	2.002	2.002	0	0
dmrta2	0	0	0	0	0	0	0	0
agbl4	0	0	0	0	0	0	0	0
zgc:171480	2.002	3.004	2.003	2.002	3.003	2.002	3.003	5.002
qsox1	0	1.001	2.003	2.002	0	1.001	0	0
lhx4	0	0	0	0	0	0	0	0
xpr1a	0	0	1.002	1.001	0	0	1.001	0
ndufb11	9.009	13.018	5.008	19.021	10.011	10.012	1.001	4.002
si:dkey-6n6.1	0	0	0	0	0	0	0	0
bgna	0	0	0	0	0	0	0	0
dedd	1.001	0	0	0	1.001	1.001	0	0
ugt5e1	0	0	0	0	0	0	0	0
si:dkeyp-110g5.4	1.001	0	0	0	1.001	2.002	0	0
igf3	0	0	0	0	0	0	0	0
doc2d	0	0	0	0	0	0	0	0
lonrf1l	3.003	2.003	4.006	4.004	3.003	1.001	4.004	2.001
kcnn1b	0	0	0	0	0	0	0	0
zgc:194990	0	0	0	0	0	0	0	0
dennd2da	0	0	0	0	0	0	0	0
cept1a	0	1.001	0	0	0	0	0	0
endog	1.001	0	0	0	0	0	0	0
anapc7	0	0	1.002	0	0	1.001	1.001	0
si:ch211-248e11.2	0	0	4.006	0	0	3.004	0	0
tjp2b	1.001	1.001	3.005	1.001	2.002	0	2.002	2.001
nr1h5	1.001	0	0	0	0	0	0	0
pqlc2	1.001	0	0	0	0	0	0	0
bcas2	5.005	3.004	3.005	0	1.001	5.006	1.001	2.001
ampd1	1.001	0	0	2.002	0	0	1.001	1
pip5k1bb	1.001	4.006	0	1.001	1.001	0	1.001	2.001
pim1	4.004	3.004	4.006	7.008	3.003	5.006	6.007	9.004
kcnd1	0	0	0	0	0	0	0	0
ptpn18	0	0	1.002	0	0	0	0	0
plxna3	1.001	1.001	1.002	1.001	1.001	0	0	0
bcap31	2.002	1.001	4.006	0	3.003	2.002	2.002	3.001
pim2	7.007	1.001	3.005	1.001	5.005	3.004	5.006	3.001
uxt	1.001	0	0	1.001	1.001	1.001	0	0
zgc:86609	4.004	0	1.002	0	1.001	1.001	1.001	1
grm6a	0	0	0	0	0	0	0	0
tsr2	0	2.003	0	2.002	1.001	0	1.001	0
zgc:113363	1.001	2.003	0	2.002	1.001	4.005	1.001	2.001
hcfc1b	3.003	2.003	1.002	3.003	1.001	2.002	3.003	3.001
pcsk1nl	0	0	0	0	0	0	0	0
ssuh2rs1	0	0	0	1.001	0	0	0	0
asic1a	0	0	0	0	0	0	0	0
wdr13	1.001	0	3.005	3.003	2.002	2.002	1.001	1
neflb	0	0	0	0	0	0	0	0
vsig8b	0	0	0	0	0	0	0	0
bnip3la	1.001	1.001	1.002	0	1.001	1.001	0	1
tp73	0	0	0	0	0	0	0	0
adra1aa	0	0	0	0	0	0	0	0
tmem127	0	0	0	1.001	1.001	0	1.001	1
hsp70l	4.004	0	0	0	2.735	0	4.004	1
zgc:63587	0	0	1.002	1.001	1.001	1.001	0	2.001
dhx37	2.002	0	1.002	0	1.001	0	0	0
srrd	0	0	0	0	0	0	0	1
pptc7a	0	0	0	0	0	0	0	0
rab35b	1.001	1.001	2.003	0	0	1.001	0	0
zgc:165519	0	0	0	0	0	0	0	0
zgc:173737	0	0	0	0	0	0	0	0
zgc:103510	0	0	0	0	0	0	0	0
crb2b	1.001	0	1.002	0	2.002	0	0	1
sh3glb2a	0	0	0	0	0	0	1.001	0
seta	8.008	7.01	6.009	7.008	3.003	7.008	9.01	12.005
si:ch211-51h9.7	3.003	0	0	0	0	0	0	0
rpl6	143.141	131.184	141.22	130.144	159.173	137.165	117.129	132.06
dynll1	6.006	3.004	1.002	3.003	1.001	4.005	5.006	2.001
si:ch211-220d9.3	0	0	0	0	0	0	0	0
vdac3	48.047	61.086	58.091	58.064	53.058	60.072	39.043	65.029
efna5b	1.001	0	0	0	0	0	0	0
avp	0	0	0	0	0	0	0	0
sprb	0	0	0	0	0	0	0	0
ptger4a	1.001	0	1.002	0	2.002	0	0	0
mrps27	1.001	3.004	2.003	2.002	4.004	4.005	5.006	3.001
fabp1b.1	0	0	0	0	0	0	0	0
srp19	1.001	0	1.002	1.001	0	0	0	0
pym1	1.001	2.003	1.002	3.003	0	0	1.001	0
gins4	0	0	0	0	0	0	0	0
mir7a-3	0	0	0	0	0	0	0	0
tmed7	5.005	1.001	1.002	4.004	1.001	4.005	0	2.001
prr16	0	0	0	0	0	0	0	0
zgc:112102	0	0	0	0	0	0	0	0
cldnd1a	0	0	0	0	0	0	0	0
gtf2f2b	0	0	0	0	0	0	0	0
ppp1cbl	6.006	2.003	7.011	4.004	4.004	4.005	5.006	6.003
zgc:163061	0	0	0	0	0	0	0	0
casq1b	8.008	5.007	10.016	10.011	16.017	6.007	8.009	6.003
ywhae2	1.001	3.004	1.002	1.001	1.001	1.001	1.001	2.001
tyms	0	0	0	0	0	0	0	0
lgi2a	0	0	0	0	0	0	0	0
ccdc149a	0	0	0	0	0	0	0	0
gba3	0	0	0	0	0	0	0	0
myoz2a	0	0	3.005	1.001	1.001	2.002	1.001	3.001
tspan5a	1.001	1.001	2.003	2.002	1.001	2.002	1.001	2.001
spata6l	0	0	0	0	0	0	0	0
ctdnep1b	0	1.001	0	0	2.002	1.001	0	1
olfcw1	0	0	0	0	0	0	0	0
olfcs2	0	0	0	0	0	0	0	0
zgc:162592	0	0	0	0	0	0	0	0
gcshb	0	0	0	0	0	0	0	0
znf143a	0	0	0	1.001	1.001	0	0	1
swap70a	0	0	0	0	0	0	0	0
arntl1b	0	0	0	0	0	0	0	0
pth1b	0	0	0	0	0	0	0	0
eif4g2a	3.003	4.006	3.005	2.002	2.002	4.005	3.003	1
tpcn2	0	2.003	0	0	0	1.001	0	0
zdhhc21	0	1.001	0	1.001	0	0	0	0
nagk	1.001	0	0	0	0	1.001	1.001	0
lypla1	0	1.001	0	0	0	0	2.002	1
mrpl15	5.005	4.006	4.006	3.003	3.003	5.006	2.002	3.001
rbpjb	0	0	1.002	0	0	0	0	1
tdrd7b	1.001	0	0	0	0	0	1.001	0
rwdd	1.001	1.001	1.002	1.001	0	2.002	1.001	0
LOC573060	0	0	0	0	0	0	0	0
rell1	1.001	0	0	0	0	0	0	0
hspa12b	6.006	2.003	3.005	2.002	2.002	3.004	1.001	5.002
etnppl	0	0	0	0	0	0	2.002	0
larp7	0	0	0	0	0	0	0	0
plag1	0	0	1.002	0	0	1.001	0	1
sdr16c5b	4.004	1.001	0	0	0	0	1.001	0
sdcbp	0	0	0	0	0	0	0	0
mad2l1	0	0	0	0	0	1.001	0	0
enosf1	0	1.001	2.003	1.001	0	1.001	1.001	0
nqo1	0	1.001	0	0	0	0	0	0
cops8	1.001	2.003	1.002	0	0	1.001	1.001	4.002
dpep1	0	0	0	0	0	0	0	0
LOC796180	0	0	0	0	0	0	0	1
znf609b	1.001	0	0	2.002	0	1.001	0	4.002
rps17	29.029	18.025	18.028	24.027	25.027	24.029	19.021	14.006
ccnd1	0	1.001	1.002	2.002	1.001	3.004	0	1
cdkn2aip	0	0	0	0	2.002	0	1.001	0
mtfmt	2.002	0	1.002	2.002	0	2.002	1.001	0
tcf12	6.006	2.003	5.008	7.008	2.002	2.002	6.007	6.003
tas2r201.1	0	0	0	0	0	0	0	0
si:dkey-286h2.3	0	0	0	0	0	0	0	0
cyp2x10.2	0	0	0	0	0	0	0	0
slc38a7	0	0	1.002	0	0	0	0	0
got2b	13.013	10.014	19.03	11.012	12.013	10.012	8.009	12.005
bmp15	0	0	0	0	0	1.001	0	0
cited1	2.002	0	1.002	2.002	0	0	0	2.001
arhgap36	1.001	1.001	3.005	0	0	0	1.001	1
ankrd46b	0	1.001	0	0	0	0	2.002	0
mfap1	2.002	1.001	3.005	0	1.001	5.006	2.002	2.001
hddc3	0	0	1.002	0	0	0	0	2.001
vps33b	1.001	1.001	0	2.002	0	0	2.002	0
hsd17b12b	2.002	0	1.002	1.001	3.003	3.004	0	2.001
ascl1b	0	0	0	0	0	0	0	0
hrasb	0	0	1.002	0	0	1.001	1.001	0
igf2a	1.001	0	0	2.002	0	0	0	0
cpt1aa	1.001	0	0	0	1.001	0	0	0
osbpl9	2.002	0	2.003	1.001	1.001	2.002	2.002	2.001
traf6	0	0	0	0	0	0	0	0
kcnq1	1.001	3.004	2.003	2.002	4.004	1.001	0	1
lingo1b	0	0	0	0	0	0	0	0
slc25a44b	0	0	0	0	0	1.001	1.001	0
rbpms2b	34.034	31.044	35.055	51.056	32.035	37.045	34.037	36.016
cpeb1b	0	1.001	1.002	0	0	2.002	1.001	0
ccne1	0	0	0	0	0	0	0	0
zgc:162297	0	0	0	0	0	0	1.001	0
zgc:101715	0	0	0	0	0	0	0	0
plekhf1	0	0	0	0	0	0	0	0
ciao2b	0	0	0	0	2.002	0	2.002	1
ca7	0	0	0	0	0	0	0	0
nae1	3.003	3.004	3.005	2.002	1.001	2.002	4.004	2.001
dync1li2	0	2.003	0	0	0	0	1.001	0
cmtm4	0	0	0	1.001	0	0	1.001	0
zgc:92818	2.002	2.003	2.003	1.001	3.003	2.002	6.007	1
elovl8b	0	0	0	0	0	0	0	0
orc6	0	0	0	0	0	0	0	0
vps35	3.003	1.001	2.003	5.006	4.004	6.007	4.004	4.002
hrh3	0	0	0	0	1.001	0	0	0
malrd1	0	0	0	0	0	0	0	0
smarcd3b	0	0	2.003	0	1.001	1.001	0	1
garem	2.002	2.003	0	0	0	1.001	0	1
insig1	1.001	1.001	0	1.001	3.003	0	0	2.001
en2a	0	1.001	0	0	0	0	0	0
ncs1b	0	0	1.002	1.001	0	1.001	2.002	1
shha	0	0	0	0	0	0	0	0
lmbr1	0	1.001	0	0	0	0	0	0
nom1	1.001	2.003	1.002	1.001	0	1.001	1.001	0
ube3c	0	0	2.003	0	3.003	0	4.004	1
dnajb6b	5.005	2.003	5.008	2.002	4.004	6.007	3.003	7.003
ncapg2	0	0	0	0	0	0	0	0
shrprbck1r	0	1.001	1.002	3.003	0	1.001	1.001	0
grpel1	0	3.004	0	2.002	4.004	3.004	2.002	2.001
ccdc96	1.001	0	0	0	0	0	0	0
zgc:158564	5.005	11.015	2.003	7.008	6.007	11.013	9.01	10.005
ptprja	0	1.001	0	0	0	0	0	0
slc22a18	1.001	1.001	0	3.003	0	0	1.001	0
tnnt3b	0	0	0	0	0	0	0	0
acp2	0	0	0	0	0	0	0	0
ambra1a	0	2.003	1.002	1.001	2.002	0	1.001	1
mdka	6.006	1.001	4.006	7.008	5.005	1.001	6.007	3.001
creb3l1	0	1.001	0	0	2.002	1.001	0	0
eef1akmt1	1.001	1.001	0	0	2.002	0	1.001	0
zgc:110699	0	1.001	0	3.003	1.001	0	9.01	2.001
syt13	0	0	1.002	0	0	0	0	0
psmc3	5.005	3.004	4.006	3.003	1.001	2.002	4.004	3.001
c6ast1	0	0	0	0	0	0	0	0
c6ast3	0	0	0	0	0	0	0	0
zgc:165481	0	0	0	0	0	0	0	0
rhpn2	5.005	0	0	2.002	1.001	3.004	5.006	1
lrp3	0	0	0	0	0	0	0	0
gpatch1	0	0	2.003	1.001	1.001	1.001	0	0
sort1b	0	1.001	0	1.001	1.001	0	2.002	1
cebpa	1.001	0	3.005	2.002	3.003	1.001	2.002	1
heatr3	1.001	1.001	1.002	1.001	0	1.001	1.001	2.001
tent4b	3.003	2.003	2.003	2.002	1.001	0	2.002	2.001
dok1b	0	3.004	1.002	4.004	2.002	3.004	1.001	1
zgc:195356	0	0	0	0	0	0	0	0
aktip	1.001	3.004	3.005	5.006	3.003	5.006	6.007	2.001
irx5a	1.001	2.003	3.005	6.007	1.001	1.001	1.001	0
htr1aa	0	0	0	0	0	0	0	0
irx6a	0	0	1.002	0	0	0	0	1
hsd11b2	36.036	24.034	16.025	23.025	21.023	31.037	34.037	22.01
LOC562139	0	0	0	0	0	0	0	0
zgc:136461	0	0	0	0	0	0	0	0
zgc:112160	0	0	0	0	0	0	0	0
mir26a-1	0	0	0	0	0	0	0	0
dock5	0	0	1.002	0	0	0	0	0
galr1b	0	0	0	0	0	0	0	0
esrp2	0	0	0	0	0	0	0	0
si:dkey-148a17.6	0	0	0	0	0	0	0	0
si:dkey-148a17.5	0	0	0	0	0	0	0	0
slc9a5	0	0	0	0	0	0	0	0
tex9	0	0	0	0	0	0	1.001	0
cln6a	0	0	0	0	0	0	0	1
irx3a	0	0	0	0	0	0	0	0
fibinb	2.002	1.001	2.003	1.001	1.001	2.002	1.001	1
tipin	0	0	0	0	0	0	0	0
smad3a	1.001	1.001	0	0	0	0	1.001	1
anp32a	9.009	7.01	4.006	7.008	13.014	10.012	3.003	6.003
itga11a	0	0	1.002	0	0	0	0	0
zgc:153219	0	0	0	0	0	0	0	0
cd81a	39.038	25.035	31.048	34.038	22.024	22.027	27.03	51.023
tssc4	2.002	1.001	2.003	1.001	0	0	2.002	1
ano5b	0	3.004	1.002	2.002	0	2.002	3.003	1
acox3	3.003	0	2.003	0	3.003	1.001	2.002	2
arl14ep	1.001	1.001	0	1.001	0	1.001	0	0
fshb	0	0	0	0	0	0	0	0
mettl15	0	0	0	0	1.001	0	0	0
lin7c	2.002	2.003	3.005	5.006	1.001	2.002	1.001	3.001
bmp1a	3.003	1.001	0	1.001	1.001	4.005	1.001	6.003
eif3jb	3.003	3.004	2.003	6.007	1.001	3.004	2.002	5.002
mcee	0	0	2.003	3.003	2.002	2.002	1.001	1
rnf111	0	0	1.002	1.001	2.002	3.004	0	1
lipca	0	0	0	0	0	0	0	0
aldh1a2	8.008	7.01	2.003	9.01	2.002	5.006	9.01	9.004
nfu1	7.007	2.003	2.003	5.006	4.004	3.004	5.006	7.003
serf2	28.028	15.021	26.041	26.029	13.014	18.022	19.021	14.006
wdr76	0	0	0	0	0	0	0	0
si:ch211-107o10.3	0	0	2.003	2.002	1.001	0	0	0
tmed3	1.001	0	0	0	0	0	0	0
tln2a	2.002	1.001	3.005	10.011	5.005	3.004	1.001	0
anxa2b	0	0	0	0	0	0	0	0
mir204-2	0	0	0	0	0	0	0	0
trpm1a	0	0	0	0	0	0	0	0
rab8b	2.002	1.001	1.002	1.001	0	1.001	3.003	1
tradd	0	0	1.002	2.002	1.001	1.001	0	1
fbxl8	0	0	0	0	0	0	0	0
ogfod1	1.001	1.001	3.005	0	0	0	1.001	2.001
acd	0	0	0	0	0	0	0	0
vrk3	2.002	0	0	3.003	0	3.004	0	1
cog4	0	0	0	1.001	0	2.002	0	0
nrn1lb	0	0	0	0	0	0	0	0
dnaaf1	0	0	0	0	0	0	0	0
ccdc102a	0	0	1.002	1.001	0	2.002	0	0
adgrg1	1.001	1.001	1.002	0	4.004	2.002	0	2.001
tmem9b	1.001	0	2.003	1.001	6.007	0	0	2.001
st5	0	0	1.002	2.002	0	0	0	1
calca	0	0	0	0	0	0	0	0
gsk3b	1.001	0	0	1.001	2.002	0	0	0
sox6	0	0	0	0	1.001	1.001	1.001	0
prc1b	1.001	0	0	0	0	0	0	0
nucb2a	8.008	5.007	12.019	9.01	11.012	11.013	9.01	6.003
hes2.2	0	0	0	0	0	0	0	0
tspan18a	1.001	0	2.003	1.001	0	1.001	1.001	0
cd82a	2.002	4.006	1.002	4.004	3.003	2.002	5.006	2.001
tp53i11a	0	0	0	0	0	0	0	1
vwc2l	0	0	0	0	0	0	0	0
si:ch1073-392o20.1	0	0	0	0	0	0	0	0
phf23b	0	1.001	1.002	1.001	3.003	2.002	3.003	0
plscr3b	3.003	1.001	0	3.003	6.007	2.002	2.002	2.001
senp3b	1.001	0	0	1.001	0	1.001	0	0
mpdu1b	1.001	0	0	0	0	2.002	1.001	0
zgc:77439	1.001	0	2.004	1.001	0	2.002	0	2.001
ap1s1	1.001	1.001	1.002	1.001	1.001	0	0	1
si:ch211-196f2.7	0	0	0	0	0	0	0	0
or129-1	0	0	0	0	0	0	0	0
ache	2.002	7.01	1.002	2.002	4.004	5.006	3.003	2.001
zgc:92664	0	1.001	1.002	0	1.001	0	0	0
mir457a	0	0	0	0	0	0	0	0
arrb2b	0	5.007	1.002	1.001	5.005	3.004	3.003	4.002
hmgb3a	3.003	1.001	2.003	4.004	4.004	3.004	3.003	4.002
mtmr1a	0	0	0	0	0	0	0	1
mtm1	0	0	1.002	0	1.001	0	0	0
exoc6b	2.002	4.006	2.003	4.004	2.002	0	1.001	2.001
zgc:101765	0	0	0	0	0	0	0	0
gpha2	0	0	1.002	0	0	0	0	0
arl2	0	0	0	1.001	1.001	0	0	1
rcor2	0	0	0	0	0	0	0	0
krcp	0	0	0	0	0	0	0	0
zgc:113305	0	0	0	0	0	0	0	0
otub1b	2.002	1.001	4.006	4.004	3.003	5.006	2.002	1
calb2b	0	0	0	0	0	0	0	0
btr09	2.002	2.003	1.002	1.001	2.002	0	0	1
nat8l	1.001	0	0	0	0	0	0	0
haus3	0	0	0	1.001	0	0	0	0
gmpr2	1.001	0	0	2.002	1.001	0	1.001	0
mrpl52	2.002	0	3.005	1.001	0	3.004	3.003	2.001
f2	0	0	0	0	0	0	0	0
dhrs4	1.001	4.006	4.006	0	3.003	2.002	3.003	0
cideb	0	0	0	0	0	0	0	0
trmt44	0	0	1.002	0	0	1.001	0	0
vbp1	2.002	3.004	2.003	3.003	4.004	2.002	0	0
zgc:162171	0	0	0	0	0	0	0	0
zgc:109889	0	0	0	0	0	0	0	0
htr2cl1	0	0	0	0	1.001	0	0	0
mir730	0	0	0	0	0	0	0	0
tnfsf10l	0	0	0	1.001	1.001	0	0	0
pygmb	18.018	17.024	15.023	14.015	24.026	18.022	15.017	12.005
rbm4.1	0	0	1.002	1.001	0	1.001	0	1
rbm4.2	2.002	1.001	1.002	0	4.004	1.001	5.006	1
ponzr6	0	0	0	0	0	0	0	0
ugt5g1	0	1.001	0	2.002	3.003	1.001	2.002	2.001
polr2m	0	0	3.005	2.002	1.001	1.001	0	1
ponzr3	0	0	0	0	0	0	0	0
ponzr5	0	0	0	0	0	0	1.001	0
fgf11a	0	0	0	0	0	0	0	1
tmem256	1.001	0	3.005	3.003	0	2.002	0	0
nlgn2a	0	0	0	0	0	0	0	0
pop7	1.001	1.001	0	2.002	0	1.001	2.002	0
si:dkey-85k7.7	3.003	3.004	6.009	1.001	2.002	3.004	1.001	1
tmem88b	9.009	8.011	10.016	12.013	7.008	3.004	6.007	5.002
serpinh2	0	0	0	0	0	0	1.001	0
fis1	2.002	1.001	0	1.001	1.001	2.002	3.003	1
cldn15a	0	0	0	0	0	0	0	0
mettl5	0	1.001	0	0	1.001	0	0	0
dnajc3b	4.004	2.003	0	0	0	0	2.002	1
cyb5d1	0	0	0	0	0	0	0	0
tnfsf12	2.002	0	1.002	1.001	0	0	1.001	2.001
sat2a	0	0	0	0	0	0	0	0
mrpl21	0	0	1.002	1.001	1.001	3.004	0	0
zgc:114045	2.002	0	2.003	1.001	0	1.001	2.002	0
snx15	0	2.003	1.002	2.002	0	1.001	0	0
zgc:110591	1.001	0	2.003	0	1.001	0	2.002	0
gkap1	0	2.003	2.003	1.001	2.002	3.004	1.001	0
si:ch211-285j22.3	0	0	0	0	0	0	0	0
ttc5	0	0	1.002	0	1.001	1.001	1.001	0
il13ra1	0	0	0	1.001	0	0	0	0
fcer1g	1.001	0	0	0	0	0	0	0
si:ch73-41h24.1	1.001	0	1.002	0	0	0	1.001	0
mllt3	0	0	0	0	0	0	0	1
coro1b	0	2.003	0	0	0	1.001	0	0
si:ch211-119e14.2	1.001	1.001	0	2.002	0	0	0	0
msantd1	0	0	0	0	0	0	0	0
nmbb	0	0	0	0	0	0	0	0
cth1	0	0	0	0	0	0	0	0
mta2	0	1.001	2.003	4.004	1.001	0	2.002	1
map4k2	0	0	2.003	0	0	2.002	1.001	3.001
rtn3	1.001	4.006	0	1.001	2.002	1.001	1.001	1
nitr7a	0	0	0	0	0	0	0	0
nitr1a	0	0	0	0	0	0	0	0
nitr1f	0	0	0	0	0	0	0	0
nitr1k	0	0	0	0	0	0	0	0
nitr1m	0	0	0	0	0	0	0	0
nitr1n	0	0	0	0	0	0	1.001	0
aco1	0	1.001	1.002	0	0	1.001	0	1
nitr1c	0	0	0	0	0	0	0	0
nitr1d	0	0	0	0	0	0	0	0
nitr1i	0	0	0	0	0	0	0	0
nitr1j	0	0	0	0	0	0	0	1
nitr1l	0	0	0	0	0	0	0	0
nitr4a	0	0	0	0	0	0	0	0
nitr3b	0	0	0	0	0	0	0	0
zgc:112356	5.005	10.014	11.017	5.006	4.004	7.008	9.01	8.004
nitr11a	0	0	0	0	0	0	0	0
nitr10b	0	0	0	0	0	0	0	0
nitr10a	0	0	0	0	0	0	0	0
nitr11b	0	0	0	0	0	0	0	0
zgc:123078	0	0	0	0	0	0	0	0
nitr12	0	0	0	0	0	0	0	0
slc6a5	0	0	0	0	0	0	0	0
csrp3	32.032	15.021	45.07	39.043	25.027	28.034	44.049	37.017
zdhhc13	1.001	0	0	0	0	2.002	0	0
mpped2a	0	0	0	1.001	0	0	0	0
btr06	0	0	0	0	0	0	0	0
si:dkey-172h23.2	0	0	0	0	0	0	0	0
mrpl46	2.002	0	3.005	2.002	1.001	1.001	3.003	1
mrps11	2.002	2.003	1.002	3.003	1.001	3.004	0	1
fes	0	0	0	0	0	0	0	0
rlbp1a	0	0	0	0	0	0	0	0
pdcd7	0	0	0	1.001	1.001	1.001	0	0
clpxa	4.004	4.005	5.008	5.005	4.004	2.002	5.006	2
spg21	1.001	0	0	0	0	0	1.001	1
polr2l	1.001	1.001	2.003	1.001	0	1.001	1.001	0
rplp2l	39.038	32.045	30.047	29.032	36.039	28.034	21.023	14.006
saa	0	0	0	0	0	0	2.002	0
cx36.7	0	0	0	0	0	0	1.001	0
mex3b	0	0	0	0	0	0	0	1
mesd	0	0	0	2.002	0	1.001	0	0
abhd17c	0	1.001	0	1.001	0	0	2.002	3.001
fah	0	0	0	1.001	0	1.001	4.004	1
arnt2	0	1.001	1.002	0	0	0	0	0
aldh1a3	0	0	0	0	0	0	0	0
chsy1	0	1.001	0	0	0	0	0	1
snrpa1	0	1.001	1.002	2.002	3.003	0	0	0
tex261	0	0	0	0	0	0	0	0
jac8	0	0	0	0	0	0	0	0
aep1	0	0	0	0	0	0	0	0
zgc:172143	1.001	1.001	0	0	1.001	0	0	0
zgc:113057	0	0	0	0	0	0	0	0
sinhcafl	0	1.001	0	0	1.001	0	0	1
cxcl8b.1	0	0	0	0	0	0	0	0
trmt10b	0	2.003	0	0	0	0	0	0
b4gat1	0	1.001	0	0	0	0	0	1
six7	0	0	0	0	0	0	0	0
rbm14b	0	1.001	1.002	0	1.001	1.001	4.004	1
ccs	0	0	0	0	0	0	0	1
dusp19b	0	0	0	0	0	0	0	0
zgc:110425	0	0	0	0	0	0	0	0
hist1h2a2	0	0	0	0	0	0	0	0
zgc:154164	0	0	0	0	0	0	0	0
zgc:77041	0	3.004	2.003	0	3.003	2.002	1.001	1
h2afx3	0	0	0	0	0	0	0	0
ltb4r2a	0	0	0	0	0	0	0	0
ltb4r	0	0	0	0	0	0	0	0
si:dkey-81n2.2	0	0	0	0	0	0	0	0
si:dkey-28d5.13	0	0	0	0	0	0	0	0
LOC100000851	0	0	0	0	0	0	0	0
si:dkey-83f18.7	0	0	0	0	0	0	0	0
chmp2ba	0	0	0	0	0	0	0	0
si:dkey-83f18.9	0	0	0	0	0	0	0	0
si:dkey-83f18.10	0	0	0	0	0	0	0	0
si:dkey-83f18.11	0	0	0	0	0	0	0	0
slc12a10.1	0	0	0	0	0	0	0	0
slc12a10.2	0	0	0	0	0	0	0	0
si:dkey-88n24.7	0	0	0	0	0	0	0	0
ccdc80	4.004	1.001	4.006	4.004	2.002	2.002	2.002	3.001
si:ch73-335d12.2	0	0	0	0	0	0	0	0
si:ch211-282j17.10	0	0	0	0	0	0	0	0
si:ch211-282j17.1	0	0	0	0	0	0	0	0
LOC107980443	0	0	0	0	0	0	0	0
si:dkey-192d15.2	0	0	0	0	0	0	0	0
zgc:66473	0	0	0	0	0	0	0	0
zgc:172065	0	0	0	0	0	0	0	0
zgc:171424	0	0	0	0	0	0	0	0
supt16h	3.003	3.004	6.009	3.003	4.004	0	2.002	3.001
tox4b	0	0	0	0	0	0	0	0
epdl1	3.003	4.006	4.006	10.011	9.01	7.008	4.004	3.001
bdnf	0	0	0	0	0	0	0	0
zgc:175177	0	0	0	0	0	0	0	0
zgc:63470	0	1.001	2.003	2.002	0	2.002	0	0
nrxn2b	0	0	1.002	0	0	0	0	0
prelid3b	7.007	15.021	7.011	8.009	12.013	14.017	18.02	14.006
wbp4	1.001	0	0	2.002	4.004	1.001	0	0
kdm6al	3.003	1.001	0	0	2.002	1.001	1.001	3.001
zgc:92429	6.006	3.004	0	2.002	1.001	1.001	3.003	1
caskb	0	0	0	1.001	1.001	0	0	0
mtrf1	0	0	0	0	0	0	0	0
si:ch211-198o12.4	0	0	0	0	0	0	0	0
nufip1	0	0	0	0	0	2.002	0	0
shmt2	0	1.001	0	0	0	0	0	1
soat2	0	0	0	0	0	0	0	0
snrpb	4.004	5.007	1.002	7.008	5.005	3.004	7.008	1
tfap2c	0	0	0	0	0	0	0	0
eya2	0	2.003	0	0	0	3.004	1.001	0
pltp	0	0	0	2.002	0	0	0	0
ncoa5	0	1.001	1.002	3.003	2.002	1.001	5.006	3.001
mybphb	7.007	2.003	2.003	2.002	2.002	9.011	2.002	4.002
tnni1b	138.136	128.18	175.273	183.202	93.101	84.101	100.11	116.053
snrpc	1.001	0	0	1.001	0	0	0	1
zgc:101577	1.001	4.006	1.002	5.006	4.004	1.001	1.001	2.001
rps10	79.078	60.084	77.12	69.076	44.048	57.069	55.061	50.023
fhit	1.001	1.001	5.008	0	0	2.002	0	2.001
timm17b	1.001	1.001	0	1.001	0	1.001	0	0
cacna2d2a	0	0	0	0	0	0	1.001	0
abhd14b	0	0	1.002	0	0	0	0	0
gnb1b	4.004	5.007	6.009	3.003	2.002	0	5.006	4.002
or137-2	0	0	0	0	0	0	0	0
matn4	0	2.003	2.003	2.002	1.001	0	1.001	1
uqcc1	4.004	1.001	6.009	6.007	2.002	5.006	4.004	1
zc3h10	1.001	0	0	1.001	0	0	0	0
si:ch211-163l21.10	0	0	0	0	0	0	0	0
ywhaba	8.008	11.015	7.011	7.008	5.005	3.004	9.01	7.003
psmf1	2.002	3.004	1.002	2.002	1.001	2.002	1.001	2.001
ripor3	3.003	1.001	0	1.001	1.001	1.001	0	0
rbl1	0	0	0	1.001	0	1.001	0	0
mych	3.003	0	0	2.002	2.002	2.002	0	3.001
romo1	23.023	29.041	23.036	27.03	33.036	32.039	31.034	27.012
ergic3	1.001	1.001	0	0	0	0	0	1
pcbp2	13.013	12.017	16.025	22.024	15.016	23.028	8.009	13.006
raly	5.005	2.003	2.003	3.003	1.001	0	2.002	1
tubb1	3.003	0	2.003	1.001	1.001	2.002	0	1
hyal1	0	1.001	4.006	0	0	0	0	0
nelfcd	2.002	1.001	0	0	1.001	0	0	0
rpl10a	124.122	122.172	99.154	129.143	102.111	98.118	88.097	66.03
vapb	8.008	4.006	4.006	8.009	4.004	4.005	6.007	4.002
rab22a	1.001	0	1.002	0	1.001	0	1.001	0
rps26l	26.026	35.049	15.023	29.032	30.033	19.023	20.022	11.005
tspan2a	1.001	0	1.002	0	2.002	0	0	2.001
slc25a55a	20.02	13.018	17.027	7.008	10.011	13.016	33.036	15.007
galns	0	0	0	2.002	1.001	0	0	0
rhoca	4.004	7.01	4.006	7.008	3.003	6.007	10.011	8.004
padi2	0	0	1.002	0	0	0	0	0
grm4	0	0	0	0	0	0	0	0
tarbp2	0	2.003	0	0	0	1.001	1.001	2.001
zgc:162324	0	0	0	0	0	0	0	0
tardbp	4.004	5.007	1.002	4.004	6.007	4.005	4.004	4.002
cenps	0	0	0	0	0	0	0	0
rbm19	0	1.001	0	1.001	1.001	1.001	1.001	0
pdzrn3b	2.002	1.001	1.002	0	1.001	0	0	1
shq1	0	0	0	0	0	1.001	0	1
prok2	0	0	0	0	0	0	0	0
gpr27	0	0	0	0	1.001	0	0	0
si:dkey-58f6.2	0	0	0	1.001	0	0	0	0
mitfa	0	0	0	0	0	0	0	0
trnt1	1.001	1.001	2.003	1.001	0	0	3.003	0
sepsecs	0	1.001	0	0	0	0	0	1
tcta	1.001	2.003	2.003	1.001	1.001	1.001	1.001	1
arl8ba	2.002	1.001	1.002	0	3.003	0	0	2.001
badb	0	0	1.002	0	0	0	0	0
ip6k2a	4.004	0	3.005	4.004	2.002	4.005	3.003	5.002
adgra2	0	0	2.003	0	0	0	0	0
sec61a1l	1.001	1.001	0	2.002	1.001	1.001	2.002	0
si:dkeyp-118h3.6	0	1.001	0	1.001	0	0	1.001	0
emc3	2.002	3.004	3.005	2.002	2.002	1.001	1.001	1
fancd2	0	0	0	0	0	0	0	0
parp3	3.003	0	1.002	0	1.001	0	2.002	0
hemk1	2.002	3.004	2.003	0	2.002	1.001	1.001	1
cish	2.002	2.003	0	1.001	2.002	0	0	0
mirlet7j	0	0	0	0	0	0	0	0
wdr82	2.002	0	0	0	1.001	0	1.001	1
cplane2	1.001	0	0	0	0	0	0	0
synpr	0	0	0	0	0	0	0	0
opn1mw4	0	0	0	0	0	0	0	0
opn1mw3	0	0	0	0	0	0	0	0
opn1mw2	0	0	0	0	0	0	0	0
srsf3a	1.001	2.003	0	3.003	0	2.002	1.001	3.001
entpd8	1.001	0	0	0	0	0	0	0
eif4enif1	1.001	1.001	1.002	0	0	0	0	0
zgc:172271	0	0	0	0	0	0	0	0
sirt4	1.001	0	0	1.001	2.002	0	0	1
ddit3	4.004	4.006	0	2.002	1.001	4.005	5.006	3.001
zgc:112163	0	1.001	0	0	0	0	0	0
mustn1a	1.001	0	1.002	0	1.001	0	0	0
harbi1	1.001	0	1.002	0	0	0	0	0
gata2b	0	0	0	0	0	0	0	0
h1fx	3.003	3.004	4.006	3.003	5.005	6.007	2.002	3.001
arpc4	1.001	0	3.005	0	1.001	1.001	0	1
ccdc36	0	0	0	0	0	0	0	0
si:ch211-157b11.12	1.001	0	1.002	0	1.001	1.001	0	0
si:ch211-157b11.14	25.025	27.038	20.031	26.029	11.012	9.011	20.022	16.007
eno1b	0	0	0	0	1.001	0	0	1
uqcc2	1.001	4.006	1.002	2.002	0	4.005	3.003	5.002
gfod2	4.004	3.004	2.003	4.004	5.005	5.006	0	3.001
im:7136940	0	0	0	0	0	0	0	0
tatdn2	0	0	0	0	0	0	0	0
ip6k2b	4.004	6.008	2.003	7.008	6.007	6.007	5.006	5.002
chchd4b	0	0	1.002	0	1.001	0	0	1
sumf1	3.003	1.001	1.002	0	0	0	1.001	0
tsfm	2.002	4.006	0	0	1.001	0	1.001	0
crygm2d11	0	0	0	0	0	0	0	0
pfkmb	26.026	44.062	30.047	41.045	14.015	16.019	23.025	25.011
pfdn5	6.006	5.007	4.006	7.008	2.002	3.004	5.006	4.002
scn8ab	0	0	0	0	0	0	0	0
krt4	23.023	7.01	18.028	14.015	12.013	5.006	15.017	12.005
prss60.1	0	0	0	0	0	0	0	0
bin2b	0	0	0	0	0	0	0	0
cyfip1	3.003	7.01	4.006	5.006	6.007	4.005	8.009	4.002
piwil1	0	0	0	0	0	0	0	0
slc9a7	1.001	0	0	0	0	0	0	0
gnrhr2	0	0	0	0	0	0	0	0
jade3	0	0	0	2.002	0	0	0	2.001
cth	0	0	1.002	2.002	0	0	0	1
negr1	1.001	0	0	0	0	0	0	0
sft2d2a	0	0	0	0	0	0	0	0
tmem45a	1.001	1.001	1.002	2.002	0	1.001	0	2.001
opa1	8.008	9.013	15.023	9.01	5.005	12.014	5.006	7.003
her6	2.002	4.006	2.003	7.008	3.003	0	6.007	2.001
zgc:154046	7.007	6.008	6.009	8.009	5.005	6.007	2.002	5.002
mier1a	0	0	1.002	0	2.002	0	0	1
hsd17b7	0	0	0	0	1.001	0	0	1
uap1	0	0	0	0	0	1.001	1.001	1
uhmk1	1.001	2.003	3.005	1.001	1.001	3.004	2.002	0
rgs8	1.001	0	0	0	0	1.001	0	0
brinp3a.1	0	0	0	0	0	0	0	0
si:ch211-251b21.1	0	1.001	0	2.002	0	0	0	1
si:ch73-185c24.2	0	0	0	0	0	0	0	0
usp1	0	1.001	0	1.001	0	1.001	0	2.001
angptl3	0	0	0	0	0	0	0	0
tmco1	0	0	0	0	0	0	0	0
foxd3	0	0	0	0	0	0	0	0
alg6	0	0	0	0	0	0	0	0
osbpl6	0	0	0	0	0	0	0	0
si:dkey-148h10.5	0	0	0	0	0	0	0	0
efcab7	0	0	0	1.001	1.001	1.001	0	0
pgm1	13.013	10.014	7.011	12.013	12.013	6.007	5.006	11.005
mir101a	0	0	0	0	0	0	0	0
ak4	0	1.001	0	3.003	0	1.001	0	1
wwc3	4.004	3.004	0	3.003	1.001	3.004	1.001	1
zgc:153311	0	0	0	0	0	0	0	1
phb2b	4.004	3.004	7.011	3.003	3.003	7.008	7.008	6.003
ndufb5	14.014	10.014	10.016	13.014	8.009	8.01	9.01	10.005
si:ch211-201h21.5	0	0	0	0	0	0	0	0
zgc:172121	0	0	0	0	0	0	0	0
atp1b1a	61.06	65.092	57.089	53.059	49.053	48.058	74.082	92.042
gja8a	0	0	0	0	0	0	0	0
zbtb11	1.001	2.003	1.002	1.001	0	0	1.001	0
tbc1d23	1.001	4.006	1.002	1.001	2.002	2.002	1.001	0
tp63	0	1.001	1.002	0	0	0	1.001	0
tprg1	0	0	0	0	0	0	0	1
pop4	0	0	0	0	1.001	1.001	0	0
amotl2a	4.004	2.003	5.008	6.007	2.002	8.01	5.006	2.001
im:7152348	0	0	0	0	0	0	0	0
slc1a2a	0	0	0	0	0	0	0	0
slco2a1	0	0	0	0	0	0	0	0
zgc:103559	0	0	0	0	0	0	0	0
dtymk	0	0	0	0	0	0	0	0
boka	0	2.003	1.002	3.003	1.001	0	0	1
hdlbpa	59.058	59.083	64.1	65.072	76.083	85.103	68.075	75.034
qars	1.001	2.003	0	1.001	0	0	0	0
lmo4b	0	0	0	0	0	0	1.001	1
cygb2	0	0	0	2.002	2.002	0	0	0
gga1	2.002	1.001	2.003	2.002	2.002	1.001	3.003	0
si:dkey-156n14.5	4.004	11.015	2.003	2.002	8.009	14.017	3.003	12.005
si:dkey-19e4.5	3.003	0	2.003	3.003	3.003	2.002	1.001	2.001
si:dkey-43k4.3	0	0	0	0	0	0	0	0
txndc9	3.003	8.011	4.006	9.01	6.007	2.002	7.008	5.002
psmd12	0	1.001	1.002	2.002	1.001	1.001	0	5.002
lmo1	0	0	0	0	0	0	0	0
prkcaa	1.001	0	0	0	0	0	0	0
cidec	0	0	1.002	0	0	0	1.001	0
spega	6.006	7.01	4.006	3.003	5.005	6.007	6.007	3.001
igfbp5a	0	0	0	0	0	0	0	0
aanat1	0	0	0	0	0	0	0	0
ten1	1.001	0	0	0	1.001	0	1.001	0
evpla	0	0	0	0	0	0	0	0
barhl2	0	0	0	0	0	0	0	0
scinla	1.001	0	1.002	0	0	0	1.001	0
zgc:109982	0	0	0	0	0	0	0	0
prf1.6	0	0	0	0	0	0	0	0
dr1	0	0	0	0	0	0	0	1
p4hb	2.002	3.004	7.011	6.007	2.002	3.004	2.002	3.001
ccdc40	0	0	0	0	1.001	0	0	0
dgke	0	0	0	0	0	0	0	0
rab11fip4b	0	0	1.002	1.001	0	0	0	0
tbx15	0	0	0	0	0	0	0	0
suz12b	0	2.003	0	2.002	1.001	0	1.001	0
tefm	0	0	1.002	0	1.001	0	1.001	0
stac3	0	0	0	0	0	0	0	0
rhot1b	0	0	0	0	0	0	0	0
rhbdl3	0	0	0	0	0	0	0	0
si:rp71-81e14.2	0	0	0	0	0	0	0	0
zgc:174863	6.006	4.006	4.006	3.003	4.004	4.005	5.006	4.002
jpt1a	0	0	0	0	0	0	0	0
stx8	2.002	0	1.002	1.001	0	0	3.003	0
ntn1a	1.001	0	0	0	4.004	0	0	1
psmb3	1.001	1.001	2.003	1.001	0	1.001	3.003	2.001
st6gal2b	0	0	0	0	0	0	0	0
nck2b	1.001	1.001	2.003	2.002	2.002	0	0	1
dph3	0	0	0	0	0	0	0	0
etv5b	0	1.001	0	2.002	2.002	2.002	2.002	0
zgc:92027	2.002	0	2.003	2.002	3.003	5.006	4.004	3.001
desmb	0	0	0	0	0	0	0	0
tmem198b	0	0	0	1.001	0	1.001	0	0
opn7d	0	0	0	0	0	0	0	0
gmppab	0	0	0	0	0	0	0	1
arl6ip6	0	0	0	0	0	0	0	1
sec22bb	0	3.004	0	1.001	0	0	3.003	1
eef1b2	81.08	73.103	76.119	92.102	66.072	78.094	71.078	57.026
dytn	0	0	0	0	0	0	0	0
zgc:194469	0	0	0	0	0	0	0	0
casp8l1	0	0	0	0	0	0	0	0
tmbim1a	3.003	1.001	6.009	0	1.001	1.001	5.006	0
sdhaf2	2.002	3.004	3.005	7.008	3.003	4.005	1.001	2.001
mcm6	1.001	0	0	2.002	0	0	1.001	1
slc15a1b	0	0	0	0	0	0	0	0
stk24b	3.003	1.001	0	5.006	2.002	0	0	0
bin3	1.001	0	1.002	1.001	2.002	1.001	0	0
si:dkey-276j7.1	5.005	2.003	0	1.001	1.001	1.001	1.001	1
wdsub1	3.003	0	1.002	1.001	0	0	1.001	2.001
nitr9	0	0	0	0	0	0	0	0
atg9a	0	1.001	2.003	0	1.001	0	3.003	6.003
pttg1ipa	0	0	0	0	0	0	0	0
sumo3a	8.008	4.006	6.009	7.008	3.003	4.005	3.003	3.001
notum2	0	0	0	0	0	0	0	0
mtx2	6.006	5.007	3.005	1.001	6.007	1.001	2.002	7.003
mir10d	0	0	0	0	0	0	0	0
lnpk	0	1.001	0	0	0	1.001	1.001	1
chrna1	0	0	0	1.001	0	0	0	0
ola1	28.028	13.018	15.023	25.028	24.026	15.018	14.015	8.004
sucla2	14.014	6.008	9.014	22.024	13.014	16.019	13.014	15.007
itm2ba	36.036	59.083	42.066	43.048	53.058	43.052	42.046	64.029
nfil3-5	0	0	0	0	0	0	0	0
ccdc151	0	0	0	0	0	0	0	0
col5a2a	9.009	6.008	8.012	13.014	9.01	6.007	13.014	14.006
arhgap15	0	0	0	0	0	0	1.001	0
acp5a	0	0	0	0	0	0	0	0
hnmt	0	0	0	0	0	0	0	0
ilf3a	1.001	2.003	0	1.001	2.002	2.002	1.001	1
myh11a	8.008	10.014	6.009	5.006	4.004	7.008	6.007	14.006
fopnl	0	0	0	1.001	0	0	0	0
sult1st7	0	0	0	0	0	0	0	0
ube2g2	2.002	2.003	0	1.001	1.001	2.002	3.003	4.002
smim15	0	0	1.002	2.002	0	0	1.001	0
nabp1b	0	0	0	0	0	0	0	0
zgc:112023	2.002	0	1.002	2.002	0	0	1.001	0
stk11ip	1.001	1.001	3.005	0	1.001	0	0	1
sft2d2b	0	0	0	0	0	0	0	0
rspo4	0	0	0	0	0	0	0	0
iqcb1	0	0	0	0	0	0	0	0
LOC100006122	0	0	0	0	0	0	0	0
kalrnb	3.003	0	0	0	0	0	1.001	1
cyp27c1	0	0	0	0	0	0	0	0
tmem237b	0	0	0	0	0	0	1.001	1
myh9a	3.003	2.003	4.006	3.003	1.001	2.002	1.001	2.001
slc25a38b	1.001	1.001	1.002	0	0	0	0	1
ubn2a	0	1.001	0	0	0	1.001	1.001	0
rpl5b	90.089	77.108	66.103	73.081	112.122	93.112	84.093	83.038
erbb3a	0	0	0	0	0	0	0	0
arf3b	0	0	0	0	0	0	0	0
fkbp11	0	0	0	0	0	0	1.001	0
ccdc65	0	0	0	0	0	0	0	0
cldn10a	0	0	0	0	0	0	0	0
dzip1	1.001	1.001	0	0	1.001	1.001	0	0
trim25	8.008	2.003	5.008	4.004	3.003	4.005	4.004	2.001
atg3	1.001	1.001	1.002	6.007	1.001	0	2.002	2.001
si:ch211-114n24.6	2.002	0	1.055	1.001	1.038	0	0	1
LOC405768	2.002	4.006	3.005	2.002	0	3.004	3.003	3.001
ptgis	0	0	0	0	0	0	0	0
dtd1	0	0	0	0	0	0	0	0
b3gat3	0	0	0	0	0	0	0	1
sec23b	0	1.001	1.002	1.001	0	0	0	2.001
ccdc85al	0	0	1.002	0	0	0	0	0
zgc:113227	0	0	0	0	0	0	0	0
rtn4a	4.004	13.018	10.015	9.01	14.016	12.015	4.004	14.006
pou4f1	0	0	0	0	0	0	0	0
gnb1a	7.007	6.008	9.014	5.006	8.009	6.007	6.007	4.002
tlk1b	1.001	1.001	0	1.001	1.001	8.01	1.001	2.001
gad1b	0	0	0	0	0	0	0	0
erich2	0	0	0	0	0	0	1.001	0
ssb	3.003	5.007	2.003	3.003	4.004	5.006	1.001	2.001
phospho2	0	0	1.002	0	1.001	0	0	0
lurap1	0	0	0	0	0	0	0	0
ppig	1.001	0	0	1.001	1.001	1.001	2.002	0
dmbx1b	0	0	0	0	0	0	0	0
uqcrh	6.006	13.018	25.039	25.028	15.016	17.021	18.02	22.01
hyi	0	0	0	0	0	0	1.001	2.001
chchd6b	3.003	4.006	9.014	16.018	4.004	4.005	6.007	3.001
tas2r203	0	0	0	0	0	0	0	0
orc4	0	0	0	1.001	0	0	0	0
txnrd3	5.005	6.008	4.006	2.002	5.005	7.008	6.007	3.001
plxna1b	0	0	0	2.002	0	0	1.001	1
rps20	41.04	42.059	32.05	45.05	46.05	38.046	31.034	22.01
cyth4b	0	0	0	0	0	1.001	0	0
cacng2b	0	0	0	0	0	0	0	0
atf4a	18.018	7.01	9.014	7.008	4.004	6.007	7.008	14.006
bglapl	0	0	0	0	0	0	0	0
zglp1	0	0	0	0	0	0	0	0
s1pr5b	0	0	0	0	0	0	0	0
keap1b	2.002	1.001	0	0	2.002	0	1.001	1
ap1m2	0	0	0	0	0	0	0	0
sowahcb	0	1.001	0	0	0	0	0	0
cfap100	0	0	0	0	0	0	0	0
zgc:114175	0	0	0	0	0	0	0	1
wbp1	1.001	1.001	0	3.003	2.002	3.004	3.003	0
tbx5a	4.004	5.007	1.002	5.006	3.003	0	3.003	2.001
rab14l	4.004	1.001	2.003	2.002	3.003	1.001	2.002	0
spra	0	0	0	1.001	0	1.001	1.001	1
mir7a-2	0	0	0	0	0	0	0	0
capza1a	6.006	1.001	2.003	7.008	3.003	6.007	6.007	6.003
thnsl2	0	0	0	0	0	1.001	0	0
oxt	0	0	0	0	0	0	0	0
lhx3	0	0	0	0	0	0	0	0
gpsm1b	1.001	1.001	0	1.001	0	0	1.001	0
slc6a8	3.003	1.001	1.002	0	3.003	1.001	2.002	4.002
ak1	102.101	179.252	118.184	188.208	250.272	254.306	207.228	181.082
ptpmt1	2.002	0	2.003	1.001	0	0	1.001	0
ugt2a1	0	0	0	0	0	0	0	0
ugt2a3	0	0	0	0	0	0	0	0
ugt2a4	0	0	0	0	0	0	0	0
ythdc1	2.002	2.003	1.002	0	3.003	1.001	5.006	1
rilpl2	1.001	0	0	0	0	1.001	3.003	0
mob1a	3.003	0	4.006	3.003	2.002	0	2.002	4.002
eif2b1	0	2.003	0	1.001	1.001	1.001	2.002	0
mapkapk5	0	2.003	0	1.001	1.001	1.001	0	1
zgc:153044	0	0	0	0	1.001	1.001	0	0
si:ch211-157p22.10	1.001	1.001	0	0	0	0	0	0
psat1	0	0	0	1.001	0	1.001	0	0
mir2188	0	0	0	0	0	0	0	0
ela2l	0	0	0	0	0	0	0	0
sftpbb	1.001	0	0	0	0	1.001	0	1
usp39	0	1.001	0	0	0	0	1.001	0
rab3c	0	0	0	0	0	0	0	0
tagln3a	0	0	0	0	0	0	0	0
abhd10a	0	0	0	0	0	0	1.001	0
gtf3aa	1.001	0	0	0	0	0	0	0
spag7	3.003	14.02	8.012	7.008	8.009	6.007	8.009	9.004
ephb4a	1.001	1.001	2.003	0	2.002	2.002	2.002	1
dnajc3a	0	0	0	1.001	0	0	0	1
zbtb20	0	1.001	2.003	3.003	2.002	1.001	2.002	0
ebf2	1.001	0	0	0	0	0	0	0
unga	0	0	0	1.001	0	0	0	0
mlxip	0	0	0	2.002	0	1.001	2.002	0
slc3a2a	0	1.001	0	2.002	1.001	0	3.003	1
zcchc8	0	1.001	1.002	1.001	2.002	0	0	0
rps6ka4	1.001	1.001	0	0	0	0	1.001	1
hip1rb	0	0	0	0	0	0	0	0
prlrb	0	0	0	0	0	0	0	0
zgc:114041	0	0	0	0	0	0	0	0
jak2b	1.001	2.003	2.003	2.002	2.002	0	3.003	1
notch1b	9.009	10.014	6.009	5.006	13.014	8.01	10.011	14.006
lix1	0	0	0	0	0	0	0	0
edf1	8.008	11.015	8.012	8.009	9.01	6.007	3.003	5.002
plpp7	1.001	2.003	0	0	1.001	1.001	1.001	2.001
stau1	9.009	7.01	7.011	11.012	9.01	4.005	13.014	18.008
col27a1b	0	0	0	0	0	0	0	0
cfap157	0	0	0	0	0	0	0	0
sh2d3cb	1.001	0	2.003	2.002	1.001	1.001	2.002	3.001
mir219-2	0	0	0	0	0	0	0	0
anxa1b	0	0	0	0	0	0	0	0
pdia5	0	0	0	0	1.001	1.001	0	1
anxa1c	0	0	0	0	0	0	0	0
pappab	0	0	0	0	0	0	0	0
dnm1b	0	0	0	0	0	0	0	0
ciz1b	0	0	0	0	0	2.002	0	0
surf4l	0	0	0	1.001	1.001	0	0	0
rab14	2.002	2.003	2.003	1.001	2.002	0	3.003	4.002
prdm12b	0	0	0	0	0	0	0	0
abr	0	0	0	0	0	1.001	0	0
pho	1.001	1.001	1.002	1.001	1.001	2.002	4.004	2.001
LOC572297	0	0	0	0	1.001	0	0	0
ap2b1	8.008	8.011	4.006	8.009	7.008	6.007	5.006	4.002
ugt2a5	1.001	0	0	0	0	1.001	1.001	0
drl	0	0	0	0	0	0	0	0
si:dkey-261j4.4	0	0	0	0	0	0	0	0
orai2	0	0	1.002	0	0	0	0	0
bckdk	3.003	8.011	8.012	12.013	6.007	8.01	7.008	2.001
lrwd1	0	0	0	0	0	0	0	0
ncf1	2.002	0	0	1.001	0	0	2.002	1
spinb	0	0	0	0	0	0	0	0
castor2	5.005	4.006	1.002	3.003	3.003	2.002	9.01	7.003
mrps30	1.001	0	2.003	1.001	1.001	0	1.001	1
2023-09-10	3.003	1.001	3.005	2.002	2.002	2.002	2.002	5.002
slc25a35	0	0	0	0	0	0	0	0
zmynd19	1.001	1.001	1.002	0	0	1.001	0	1
bspry	0	0	0	0	0	0	0	0
lman2la	1.001	1.001	1.002	0	1.001	0	3.003	1
coq4	0	0	1.002	4.004	0	0	0	2.001
c1galt1b	0	0	0	0	1.001	0	0	0
alad	0	2.003	2.003	1.001	0	0	1.001	1
tmem203	0	1.001	0	1.001	1.001	0	1.001	0
ftr64	0	0	0	0	0	0	0	0
smarcb1a	1.001	2.003	1.002	4.004	1.001	1.001	1.001	0
pyroxd1	0	0	0	0	0	0	0	1
tmem248	0	0	0	0	0	1.001	2.002	0
lig3	3.003	2.003	2.003	3.003	4.004	3.004	0	1
tmem132e	0	0	0	0	0	0	0	0
dtx2	1.001	1.001	0	0	0	0	3.003	1
upk3b	1.001	0	0	0	1.001	1.001	0	0
rabep1	1.001	0	0	0	1.001	0	1.001	1
zgc:194948	0	0	0	0	0	0	0	0
slc37a2	3.003	4.006	1.002	1.001	2.002	0	1.001	0
btg4	0	0	0	0	0	0	0	0
insl5a	0	0	0	0	0	0	0	0
nr4a2b	0	0	0	0	0	0	0	0
si:dkey-27p23.3	0	0	0	0	0	0	0	0
pcolceb	0	0	0	0	0	0	0	0
ppp2r1ba	5.005	5.007	4.006	0	3.003	6.007	2.002	10.005
alg9	0	1.001	0	1.001	1.001	0	1.001	0
crfb12	0	0	0	0	0	0	0	0
zgc:153929	0	0	0	0	0	0	0	0
vax2	0	0	0	0	0	0	0	0
gb:eh456644	0	0	0	0	0	0	0	0
tmsb4x	97.096	105.148	70.109	104.115	90.098	81.098	108.119	98.044
cryabb	0	0	0	0	0	0	2.002	0
pisd	3.003	1.001	1.002	3.003	2.002	0	1.001	0
prpf4	0	2.003	0	0	2.002	1.001	0	2.001
cdc26	1.001	1.001	1.002	2.002	3.003	1.001	1.001	1
pja2	1.001	0	1.002	1.001	0	1.001	4.004	4.002
nop58	3.003	4.006	1.002	1.001	1.001	3.004	2.002	1
man2a1	1.001	0	0	0	0	0	0	0
tmem232	0	0	0	0	0	0	0	0
tia1	1.001	1.001	0	1.001	0	0	0	0
ppm1db	0	0	0	1.001	0	1.001	0	0
anapc2	0	1.001	0	0	0	0	0	0
tbx2a	1.001	0	1.002	1.001	0	0	1.001	0
aatf	1.001	0	1.002	0	0	0	0	1
lhx1b	0	0	0	0	0	0	0	0
fkbp6	0	0	0	0	0	0	0	0
kcmf1	1.001	0	2.003	0	1.001	2.002	0	1
ntrk2b	0	0	0	1.001	0	0	0	0
hnrpkl	1.001	3.004	2.003	0	0	2.002	2.002	0
gnaq	0	0	0	0	0	0	0	0
gna14	0	0	0	0	0	0	1.001	0
spopla	2.002	1.001	1.002	0	0	2.002	2.002	0
ptar1	0	0	0	0	0	0	0	0
tmem69	0	1.001	0	0	0	1.001	0	0
mamdc2a	0	0	0	0	0	0	0	0
lnpep	1.001	2.003	1.002	1.001	3.003	2.002	0	5.002
prune2	0	0	0	0	0	0	0	0
srek1	0	0	1.002	2.002	2.002	1.001	2.002	0
ccnb1	0	0	0	0	0	0	0	0
pmchl	0	0	0	0	0	0	0	0
serinc5	1.001	0	0	0	0	0	0	0
si:dkey-69o16.5	1.001	2.003	2.003	2.002	0	1.001	1.001	1
LOC100148466	0	1.001	2.003	0	1.001	0	0	1
tent2	2.002	0	0	1.001	1.001	0	1.001	1
nol11	1.001	1.001	1.002	1.001	0	0	0	1
homer1b	1.001	3.004	2.003	1.001	3.003	2.002	3.003	4.002
cmya5	2.002	2.003	0	0	1.001	1.001	2.002	2.001
otpb	0	0	0	0	0	0	0	0
ckmt2b	25.025	25.035	27.042	29.032	46.05	37.045	24.026	27.012
rasgrf2b	0	0	0	0	0	0	0	0
ubac1	1.001	0	1.002	0	1.001	1.001	2.002	1
snapc4	2.002	0	0	1.001	0	1.001	1.001	0
card9	0	1.001	0	0	0	0	0	0
pomt1	0	0	0	2.002	0	0	0	0
zgc:194398	2.002	1.001	3.005	4.004	1.001	1.001	0	0
ankrd31	0	0	0	0	0	0	0	0
col4a3bpa	0	0	1.002	1.001	0	0	0	1
zgc:194908	0	0	0	0	0	0	0	0
fam172a	0	0	0	1.001	1.001	2.002	2.002	2.001
polr3g	0	0	0	0	0	0	0	0
mef2cb	0	1.001	2.003	0	0	0	0	1
cox7c	17.017	11.015	46.072	36.04	26.028	34.041	29.032	14.006
hapln1a	0	0	3.005	6.007	1.001	2.002	5.006	13.006
vcana	0	0	0	0	0	0	0	0
zgc:110626	0	0	0	1.001	0	1.001	0	1
si:ch211-130m23.3	0	0	0	0	0	0	0	0
dmrt2a	0	0	0	0	0	0	1.001	0
dmrt3a	0	0	0	0	0	0	0	0
dmrt1	0	0	0	0	0	0	0	0
acp6	1.001	0	0	1.001	0	0	0	3.001
fbp2	0	0	0	0	0	0	0	0
mtbl	1.001	0	1.002	0	1.001	0	0	0
ctsla	20.02	24.034	7.011	8.009	3.003	8.01	9.01	11.005
tlk1a	1.001	1.001	0	0	2.002	0	1.001	6.003
nrgna	0	0	0	0	0	0	0	0
tars	2.002	2.003	1.002	5.006	1.001	3.004	5.006	3.001
zgc:112966	0	0	0	0	0	0	0	0
rhobtb2a	1.001	1.001	0	2.002	0	0	3.003	2.001
rufy3	0	1.001	3.005	0	0	0	1.001	1
nr2f1a	0	0	0	0	2.002	0	0	0
flot2a	4.004	2.003	5.008	2.002	5.005	3.004	0	0
trpv1	0	0	0	0	0	0	0	0
ubb	15.015	5.007	14.022	8.009	6.007	9.011	12.013	7.003
pigl	0	0	1.002	0	0	0	0	0
alkbh2	0	0	1.002	1.001	0	0	0	0
si:dkey-71l1.1	0	0	0	0	0	0	0	0
atxn2	2.002	0	0	0	1.001	0	0	0
riok2	5.005	3.004	4.006	11.012	3.003	8.01	3.003	5.002
epg5	1.001	2.003	2.003	1.001	4.004	1.001	1.001	2.001
dnajb5	0	0	0	0	0	0	0	0
vcp	9.009	13.018	3.005	12.013	8.009	12.014	10.011	9.004
fancg	0	0	0	0	0	0	0	0
arid3c	0	0	0	0	0	0	0	0
sub1b	2.002	6.008	2.003	2.002	1.001	3.004	2.002	6.003
fgf17	0	4.006	3.005	2.002	1.001	0	2.002	1
golph3	0	2.003	1.002	1.001	0	0	0	2.001
dvl2	0	0	1.002	1.001	1.001	1.001	2.002	0
fsta	0	0	0	0	0	0	0	0
tmem175	0	0	1.002	0	0	0	0	0
cx44.2	0	0	0	0	0	0	0	0
rasgef1ba	0	0	1.002	1.001	2.002	1.001	0	0
cfap299	0	0	0	0	0	0	0	0
prdm8b	0	0	0	0	0	0	0	0
anxa3a	0	0	0	0	0	0	0	0
fras1	0	0	0	0	1.001	0	1.001	0
mrpl1	0	0	0	1.001	1.001	1.001	1.001	0
si:dkey-58f10.6	0	0	0	0	0	0	0	0
si:dkey-58f10.7	0	0	1.002	3.003	0	0	0	0
zgc:153521	0	1.001	0	0	2.002	0	0	0
si:dkey-58f10.11	0	0	1.002	0	1.001	0	1.001	0
si:ch211-271e10.3	0	0	0	0	0	0	0	0
si:ch211-271e10.2	0	1.001	0	0	0	0	0	0
nfe2l2b	0	0	0	0	0	0	0	0
znhit1	1.001	2.003	0	0	0	0	1.001	0
mogat3b	0	0	0	1.001	0	0	0	0
gltpd2	0	0	0	0	0	0	0	0
ctu1	1.001	1.001	0	0	0	0	0	0
chrne	0	0	0	0	0	0	0	1
apoa1a	0	0	1.002	0	0	0	0	0
pafah1b2	0	0	0	1.001	0	0	0	0
scn4bb	0	0	0	0	0	0	0	0
tmprss13b	0	0	0	0	0	0	0	0
ins	0	0	0	0	0	0	0	0
cdc42ep2	0	0	0	0	0	0	0	0
LOC558044	0	1.001	1.002	0	2.002	1.001	0	0
ltbp3	8.008	5.007	9.014	6.007	3.003	3.004	6.007	10.005
wdr44	1.001	0	0	2.002	2.002	3.004	1.001	0
igfbp2a	1.001	1.001	6.009	1.001	1.001	1.001	0	1
gjd1a	0	0	0	0	0	0	0	0
kptn	0	1.001	0	0	2.002	2.002	1.001	1
hnrnpl	4.004	2.003	2.003	5.006	3.003	1.001	5.006	4.002
srsf7a	1.001	2.003	1.002	1.001	0	2.002	2.002	4.002
sall1a	1.001	4.006	4.006	7.008	2.002	3.004	1.001	3.001
nccrp1	6.006	2.003	5.008	1.001	2.002	3.004	1.001	1
ckma	344.339	281.396	541.844	367.405	262.285	240.289	228.251	254.115
dysf	2.002	3.004	1.002	3.003	2.002	5.006	0	2.001
capns1a	3.003	5.007	4.006	4.004	2.002	5.006	3.003	4.002
alkbh6	0	0	0	0	0	0	0	0
nova1	0	0	0	0	0	0	0	0
rhogc	3.003	0	0	2.002	0	2.002	0	2.001
taf1	2.002	1.001	3.005	1.001	2.002	2.002	2.002	3.001
wnt11	0	0	0	0	0	0	0	0
efnb1	0	0	0	0	0	1.001	0	0
zgc:103697	0	0	1.002	0	0	0	1.001	0
ar	3.003	3.004	4.006	3.003	1.001	2.002	2.002	2.001
znf408	1.001	0	0	0	1.001	0	0	0
atg4c	2.002	0	0	0	0	2.002	2.002	1
fbp1b	0	0	0	0	0	0	0	0
fcho2	3.003	2.003	1.002	0	3.003	2.002	1.001	3.001
foxd1	0	0	0	0	0	0	0	0
zgc:63972	0	1.001	1.002	0	0	0	0	0
dab2ipb	0	2.003	1.002	0	0	3.004	1.001	2.001
lysmd3	1.001	1.001	0	3.003	2.002	0	1.001	0
si:ch211-182d3.1	0	0	0	0	0	0	0	0
mtmr10	0	0	0	0	1.001	0	1.001	0
usp20	0	0	1.002	0	0	0	1.001	0
zgc:103692	1.001	1.001	1.002	1.001	1.001	5.006	2.002	1
med22	0	1.001	0	0	1.001	0	1.001	0
kyat1	1.001	1.001	0	2.002	0	2.002	2.002	2.001
ifitm1	1.001	5.007	2.003	9.01	2.002	2.002	5.006	5.002
prkaa1	1.001	1.001	0	0	0	2.002	0	1
zgc:55461	0	0	0	1.001	0	0	1.001	0
lmo4a	2.002	2.003	2.003	2.002	3.003	1.001	5.006	3.001
cyr61l1	0	0	0	0	0	0	0	0
pole3	1.001	1.001	0	1.001	1.001	0	1.001	1
si:dkey-261j15.2	0	0	1.002	0	0	0	0	0
rpl12	111.11	108.152	111.173	106.117	89.097	96.116	109.12	78.035
gpx8	0	0	2.003	0	0	1.001	0	1
crata	0	2.003	6.009	6.007	1.001	5.006	3.003	1
ptpa	1.001	1.001	0	0	2.002	2.002	1.001	1
ier5l	0	0	1.002	0	0	0	1.001	0
ncs1a	0	0	0	0	0	0	0	0
gas1b	0	1.001	1.002	0	1.001	0	0	3.001
c9	0	0	0	0	0	0	0	0
dab2	0	1.001	2.003	0	0	1.001	0	0
myhz2	0	0	0	0	0	0	0	0
tescb	0	0	0	0	0	0	0	0
ddx51	1.001	1.001	1.002	0	0	1.001	1.001	2.001
zmat5	2.002	0	0	0	1.001	0	1.001	0
ppp6c	6.006	4.006	5.008	1.001	3.003	4.005	3.003	0
tmem119b	0	0	2.003	0	1.001	0	0	1
rab39bb	0	0	0	0	0	0	0	0
slc25a25b	0	0	0	0	0	0	0	0
si:dkey-251i10.2	0	0	0	0	0	0	0	0
fam102ab	0	0	1.002	2.002	0	1.001	1.001	1
p2rx1	0	0	0	0	0	0	0	0
camkk1a	0	1.001	0	0	0	0	0	0
ankfy1	5.005	2.003	0	2.002	1.001	2.002	2.002	0
spns3	0	0	0	0	0	0	0	0
rab20	0	1.001	0	4.004	0	1.001	2.002	2.001
spns2	0	0	0	1.001	0	1.001	1.001	1
atp5l	27.027	40.056	37.058	46.051	41.045	26.031	15.017	18.008
stk25a	0	0	1.002	0	0	0	0	0
fdxacb1	0	0	0	0	0	0	0	0
si:ch211-117m20.5	0	0	0	0	0	0	0	0
dpagt1	0	0	0	0	0	1.001	1.001	2.001
c2cd2l	0	0	0	0	0	1.001	1.001	0
zbtb44	0	0	0	0	0	0	0	0
timm8b	1.001	1.001	2.003	1.001	1.001	0	1.001	0
mir125b-2	0	0	0	0	0	0	0	0
mirlet7a-4	0	0	0	0	0	0	0	0
wdr4	0	0	0	1.001	0	0	0	0
f11r.2	0	0	0	0	0	0	0	0
thy1	0	3.004	0	1.001	1.001	0	0	0
tsc1a	4.004	4.006	2.003	5.006	2.002	16.019	5.006	4.002
ehmt1a	2.002	1.001	2.003	1.001	0	0	0	1
man1b1b	0	0	0	0	1.001	0	0	0
dpp7	1.001	0	1.002	2.002	1.001	0	5.006	1
fam129bb	0	0	2.003	1.001	0	1.001	2.002	2.001
zgc:174260	0	0	0	0	0	0	0	0
trafd1	0	0	1.002	2.002	2.002	3.004	1.001	0
nfr	0	0	0	0	0	0	0	0
ogfod2	0	0	0	0	0	0	0	0
zgc:113436	1.001	0	0	0	1.001	0	0	0
rorca	0	0	1.002	1.001	0	0	1.001	0
abcb9	1.001	0	0	0	0	1.001	1.001	0
ppp3cca	1.001	0	0	0	1.001	0	0	0
loxl2b	0	0	1.002	1.001	3.003	1.001	1.001	2.001
ntan1	1.001	0	0	0	0	0	0	0
olfm1a	0	0	0	0	0	0	0	0
histh1l	7.007	6.008	4.006	3.003	6.007	7.008	5.006	5.002
ackr3b	2.002	0	1.002	1.001	0	0	0	1
hdr	1.001	1.001	0	1.001	1.001	0	1.001	2.001
araf	0	0	0	3.003	0	1.001	1.001	0
gnat1	0	0	0	0	0	0	0	0
imp4	0	2.003	0	0	0	0	0	0
si:ch211-102c2.4	0	0	1.002	0	1.001	0	0	1
gpc6b	0	0	0	0	0	0	0	0
si:ch211-102c2.7	1.001	0	0	1.001	1.001	0	1.001	1
tmem150aa	1.001	0	1.002	0	0	0	1.001	1
arvcfb	6.006	3.004	2.003	6.007	10.011	1.001	3.003	6.003
sept5a	0	0	0	0	0	0	0	0
oclnb	0	0	0	0	0	0	0	0
marveld2b	0	0	0	0	0	0	0	0
ccdc125	1.001	0	2.003	4.004	0	1.001	0	0
ankrd34bb	0	0	0	0	0	0	0	0
klf9	1.001	0	0	0	0	0	0	1
mir204-1	0	0	0	0	0	0	0	0
cemip2	4.004	0	3.005	2.002	1.001	3.004	2.002	1
kcnip3a	0	1.001	0	0	0	0	0	0
plcxd3	0	0	0	0	0	1.001	1.001	0
zgc:101016	0	0	2.003	2.002	0	0	1.001	0
gda	0	0	0	0	0	0	0	0
zfand5a	2.002	3.004	4.006	1.001	2.002	1.001	3.003	1
tmc2b	0	0	0	0	0	0	0	0
wu:fa19b12	0	0	0	2.002	2.002	2.002	2.002	1
trpm6	0	0	0	0	0	0	1.001	0
dph7	0	0	1.002	2.002	0	1.001	1.001	0
zgc:162396	0	1.001	1.002	1.001	0	0	0	1
lepr	0	0	1.002	0	0	1.001	1.001	0
mrpl41	2.002	2.003	3.005	1.001	1.001	3.004	2.002	4.002
ewsr1b	7.007	2.003	5.008	3.003	8.009	4.005	2.002	2.001
atp6v0a2b	0	1.001	0	1.001	0	0	0	0
trmt2a	0	0	0	0	0	0	0	1
dgcr8	4.004	1.001	2.003	1.001	0	4.005	3.003	6.003
znf703	0	0	1.002	0	0	0	0	0
phf23a	0	0	0	0	0	0	0	0
plscr3a	0	0	0	0	0	0	0	0
mrpl47	1.001	2.003	2.003	3.003	3.003	2.002	4.004	7.003
senp3a	0	0	3.005	0	0	0	1.001	0
mpdu1a	0	0	0	1.001	0	0	0	0
si:ch211-137i24.10	0	0	0	0	0	0	0	1
mrps31	3.003	3.004	6.009	5.006	1.001	3.004	4.004	8.004
slc6a22.1	0	0	0	0	0	1.001	0	0
capga	0	0	0	0	0	0	0	0
tp53	1.001	1.001	2.003	0	2.002	1.001	3.003	3.001
gps2	0	1.001	0	0	0	0	2.002	0
ctdnep1a	1.001	2.003	0	1.001	0	0	0	0
pdha1a	44.043	38.053	48.075	38.042	54.059	62.075	46.051	64.029
tgfa	0	0	0	0	0	0	0	0
akr1a1b	0	1.001	0	0	0	0	0	0
eif1axa	2.002	1.001	1.002	1.001	1.001	2.002	0	2.001
gbgt1l3	0	0	0	0	0	0	0	0
si:ch211-287c22.1	0	0	0	0	0	0	0	0
gbgt1l1	0	0	0	0	0	0	0	0
rnf128a	1.001	0	1.002	2.002	0	0	1.001	0
si:dkey-110k5.6	1.001	0	2.003	2.002	1.001	0	3.003	2.001
cx39.9	0	0	0	0	0	0	0	0
cx27.5	0	0	0	0	0	0	0	0
kat5a	2.002	2.003	0	2.002	3.003	2.002	1.001	1
acsl4b	1.001	0	0	1.001	0	0	1.001	2.001
gria3a	0	0	0	0	0	0	0	0
plp1b	0	0	0	0	0	0	0	0
tbx5b	0	0	2.003	2.002	1.001	0	1.001	1
prps1a	3.003	2.003	5.008	2.002	2.002	1.001	2.002	2.001
mir92a-2	0	0	0	0	0	0	0	0
uprt	2.002	1.001	2.003	2.002	1.001	2.002	3.003	0
hmgn7	12.012	15.021	16.025	13.014	14.015	14.017	13.014	12.005
nono	3.003	4.006	1.002	1.001	3.003	2.002	1.001	4.002
fdx1b	0	0	0	0	0	0	0	0
sap130a	0	0	0	2.002	1.001	1.001	0	1
msna	50.049	28.039	47.073	40.044	36.039	34.041	41.045	31.014
las1l	1.001	0	0	0	1.001	0	0	0
zc4h2	1.001	0	0	0	0	1.001	1.001	0
shisa2a	0	0	0	0	0	0	0	0
mtmr8	0	0	0	0	1.001	0	1.001	1
asb12a	0	0	0	0	1.001	2.002	0	0
sdhda	0	0	0	0	0	0	0	0
smarca1	5.005	0	1.002	5.006	1.001	0	0	0
arhgap25	0	0	0	0	0	0	0	0
cds2	1.001	0	2.003	1.001	2.002	0	1.001	2.001
hs3st1l2	0	0	0	0	0	0	0	1
camk2b1	13.013	9.013	6.009	4.004	8.009	4.005	3.003	5.002
si:dkey-174n20.1	0	0	0	0	0	0	0	0
fth1a	91.09	68.096	103.161	89.098	132.144	97.117	63.069	102.046
faah	0	0	0	1.001	0	0	0	0
cmklr1	0	0	0	0	0	0	0	0
ficd	1.001	0	1.002	0	0	0	0	1
si:ch211-191d15.2	5.005	9.013	2.003	4.004	8.009	5.006	6.007	9.004
selplg	0	0	0	0	0	0	0	1
wasb	1.001	0	1.002	0	1.001	0	1.001	0
slc35c1	1.001	0	0	0	0	0	0	0
coro1ca	1.001	3.004	3.005	3.003	0	1.001	3.003	3.001
si:ch211-108c6.2	1.001	0	0	0	0	1.001	2.002	0
rtf2	4.004	0	0	4.004	4.004	2.002	3.003	3.001
atp5f1e	17.017	24.034	17.027	30.033	23.025	18.022	26.029	10.005
dao.3	0	0	0	0	0	0	0	0
dao.1	0	0	0	0	0	0	0	0
tbl1x	1.001	0	0	0	1.001	0	0	0
pik3c3	1.001	1.001	3.005	1.001	2.002	0	1.001	4.002
usp30	1.001	0	0	0	0	0	0	0
dhrs12	0	1.001	0	0	2.002	1.001	0	2.001
cox6c	22.022	20.028	32.05	31.034	24.026	21.025	27.03	15.007
git2a	0	1.001	2.003	1.001	2.002	1.001	2.002	1
uxs1	2.002	0	0	0	2.002	2.002	2.002	0
trpv4	1.001	4.006	3.005	1.001	3.003	6.007	3.003	5.002
rad51d	0	0	0	0	0	0	0	0
mvk	0	0	0	0	0	0	1.001	0
mmab	0	0	0	0	0	0	0	0
foxn4	0	0	0	0	0	0	0	0
fabp1a	0	0	0	0	0	0	0	0
ranbp1	3.003	7.01	5.008	5.006	5.005	6.007	5.006	5.002
poli	0	0	1.002	0	1.001	0	1.001	0
bri3bp	0	1.001	0	0	0	1.001	0	0
cdh5	9.009	10.014	6.009	1.001	6.007	7.008	11.012	5.002
ascc2	0	1.001	0	0	0	0	1.001	1
chfr	1.001	1.001	2.003	1.001	0	2.002	1.001	1
slc39a14	0	1.001	1.002	0	1.001	0	0	0
kremen1	0	1.001	0	0	1.001	0	0	0
coq5	3.003	3.004	0	1.001	1.001	1.001	0	1
znrf3	0	0	1.002	0	0	0	0	0
hspb8	8.008	8.011	6.009	7.008	3.003	5.006	4.004	7.003
kat6a	5.005	1.001	4.006	3.003	8.009	4.005	4.004	5.002
figla	0	0	0	0	0	0	0	0
efhd2	0	0	1.002	0	1.001	0	1.001	1
zgc:65851	0	0	0	0	0	0	0	0
LOC564840	0.5	1.502	0.501	2.002	1.001	2.503	2.002	2.501
sec14l8	0	0	0	0	0	0	0	0
ccl19a.2	0	0	0	0	0	0	0	0
mir130b	0	0	0	0	0	0	0	0
mir301b	0	0	0	0	0	0	0	0
dnaja2	21.021	21.03	15.023	26.029	21.023	33.04	27.03	39.018
ppm1f	0	0	0	0	0	0	0	0
mapk1	0	0	0	0	1.001	1.001	0	0
ppil2	0	0	2.003	0	1.001	1.001	0	2.001
mfn2	5.005	5.007	8.012	6.007	11.012	16.019	7.008	9.004
gal3st1a	0	0	0	0	0	0	0	0
pes	6.006	4.006	0	1.001	2.002	1.001	2.002	2.001
p2rx2	0	0	0	0	0	0	0	0
lztr1	1.001	2.003	1.002	3.003	3.003	2.002	1.001	2.001
si:dkey-98f17.3	0	0	0	0	0	0	0	0
si:dkey-98f17.5	0	0	0	0	0	0	0	0
ercc6l	0	0	0	0	0	0	0	0
rfc5	1.001	0	1.002	1.001	0	0	1.001	2.001
nipsnap1	0	0	0	0	0	0	0	0
rnft2	0	0	0	0	0	0	0	0
fbxw8	1.001	0	1.002	2.002	0	0	0	0
tesca	2.002	1.001	1.002	0	0	0	1.001	1
si:ch211-207k7.4	0	0	0	0	0	1.001	0	0
zgc:158343	0	1.002	1.002	0	0	1.002	1.002	1
ugt2b1	0	0	0	0	0	0	0	0
sypb	0	0	0	0	0	0	0	0
tal2	1.001	0	2.003	1.001	0	1.001	0	0
pmpca	1.001	1.001	0	3.003	3.003	2.002	0	2.001
dhfr	0	0	0	0	0	0	0	1
rchy1	0	0	2.003	2.002	0	0	1.001	0
kcnv2b	0	0	0	0	0	0	0	0
si:ch211-155m12.1	0	0	1.002	0	0	0	0	0
si:ch211-155m12.5	0	0	0	0	0	0	0	0
tmtops2b	0	0	0	0	0	0	0	0
fgf10b	0	0	0	0	1.001	0	0	0
zgc:153352	0	0	0	0	0	0	0	0
mybbp1a	3.003	1.001	3.005	3.003	3.003	1.001	2.002	2.001
bmpr1ba	0	0	0	0	0	0	0	0
pdlim5a	0	1.001	0	0	0	3.004	1.001	2.001
slc1a3a	0	1.001	0	1.001	2.002	0	0	1
zgc:100920	0	0	0	0	0	0	0	0
spef2	0	0	0	0	0	0	0	0
fzd7a	1.001	0	2.003	0	0	0	1.001	1
slc1a1	0	0	0	0	0	0	0	0
pxna	2.002	1.001	1.002	1.001	0	1.001	0	1
lmx1ba	0	0	0	0	0	0	0	0
zbtb43	1.001	0	0	0	0	0	1.001	0
LOC561325	1.001	2.003	1.002	0	0	0	0	0
si:ch211-156j16.1	9.009	17.024	7.011	20.022	13.014	12.014	16.018	15.007
cst14b.1	2.002	1.001	2.003	1.001	0	1.001	3.003	1
dhrs11a	0	0	0	0	0	0	0	0
ggnbp2	7.007	2.003	5.008	3.003	3.003	2.002	1.001	2.001
c1qbp	21.021	24.034	18.028	17.019	25.027	17.021	18.02	15.007
rpain	0	0	0	0	0	0	0	0
ywhag1	0	1.001	0	1.001	2.002	2.002	3.003	0
hsf5	0	0	0	0	0	0	0	0
atp5mc3a	18.018	20.028	29.045	28.031	18.02	10.012	17.019	17.008
hspa5	9.009	5.007	3.005	4.004	6.007	5.006	3.003	2.001
rabepk	0	0	0	0	0	0	1.001	0
dhx33	0	0	0	0	0	1.001	0	0
rplp0	206.203	158.222	170.265	167.185	210.229	193.233	166.183	207.094
si:ch73-55i23.1	10.01	4.006	3.005	3.003	16.017	3.004	7.008	7.003
myl12.1	11.011	10.014	18.028	10.011	10.011	12.014	17.019	14.006
mir101b	0	0	0	0	0	0	0	0
mir199-1a	0	0	0	0	0	0	0	0
dnm1a	0	0	0	0	0	0	0	0
gb:bc139872	0	1.001	2.003	0	1.001	1.001	1.001	0
tmem237a	0	0	0	0	0	0	0	0
surf2	0	0	0	0	1.001	1.001	2.002	1
rnf185	2.002	0	1.002	2.002	0	1.001	0	1
ift74	4.004	3.004	0	1.001	2.002	4.005	2.002	1
ass1	0	0	0	1.001	0	2.002	2.002	0
ddrgk1	0	0	0	0	0	0	0	1
trabd2a	0	0	0	0	0	0	0	0
june	0	0	0	0	0	0	0	0
dcc	0	0	0	0	0	0	0	0
ckap4	2.002	0	1.002	2.002	0	0	1.001	0
tchp	2.002	0	0	0	2.002	0	0	0
pacsin2	4.004	5.007	7.011	4.004	5.005	4.005	4.004	4.002
dio1	1.001	1.001	2.003	0	1.001	0	1.001	4.002
si:dkey-61p9.8	0	0	0	0	0	0	0	0
si:dkey-61p9.6	0	0	0	0	0	0	0	0
LOC558818	0	0	0	0	0	0	1.001	0
zgc:174310	0	0	2.003	0	1.001	0	0	0
zgc:92791	2.002	2.003	3.005	1.001	1.001	4.005	1.001	2.001
si:ch73-56d11.3	0	0	0	0	0	0	0	0
ms4a17a.4	0	0	0	0	0	0	0	0
ms4a17a.6	0	0	0	0	0	0	0	0
ms4a17a.2	0	0	0	0	0	0	0	0
ms4a17a.8	0	0	1.002	0	0	0	0	0
ms4a17a.9	0	0	1.002	0	0	0	0	0
large1	1.001	0	1.002	0	0	0	1.001	0
dbi	7.007	15.021	18.028	13.014	13.014	11.013	14.015	11.005
ptprb	11.011	7.01	7.011	7.008	7.008	7.008	13.014	10.005
trim24	1.001	0	2.003	2.002	1.001	0	0	0
zgc:165515	0	0	0	0	0	1.001	1.001	0
zgc:171551	0	1.001	0	0	0	0	0	1
znf989	0	0	0	0	0	0	0	0
si:ch211-165i18.2	3.003	0	1.002	1.001	0	0	0	0
zgc:171727	0	0	0	0	0	0	0	0
si:ch211-238e22.2	0	0	0	0	0	0	0	0
zgc:174275	0	1.001	0	0	0	0	0	0
zgc:174704	0	0	0	0	0	0	0	0
si:dkey-156k2.1	1.001	2.003	0	1.001	1.001	0	3.003	2.001
zgc:174180	1.001	2.003	2.003	2.002	1.001	0	0	0
LOC794656	0	0	0	0	0	1.001	0	0
si:ch211-227e10.6	0	0	0	0	0	0	0	0
znf1137	0	0	0	0	0	0	0	0
LOC108183284	0	0	0	0	0	0	0	0
znf1077	0	0	1.002	0	0	0	0	0
zgc:174650	0	0	1.002	0	1.001	0	1.001	0
si:ch211-22k7.9	1.001	0	0	0	0	0	0	0
znf1069	0	0	0	0	0	0	0	0
pappaa	1.001	0	1.002	0	0	0	1.001	0
zgc:174710	0	0	3.005	0	0	1.001	0	0
zgc:174314	0	0	0	0	0	0	0	0
fnta	2.002	1.001	3.005	1.001	0	1.001	0	0
gstp1	8.008	8.011	14.022	12.013	9.01	14.017	11.012	13.006
LOC560232	0	0	0	0	0	0	0	0
eif4bb	8.008	3.004	4.006	2.002	1.001	4.005	5.006	5.002
cdk5r2a	0	0	0	0	0	0	0	0
znf1059	0	0	0	0	0	0	0	0
mir430i-3	0	0	0	0	0	0	0	0
mir430i-2	0	0	0	0	0	0	0	0
mir430b-9	0	0	0	0	0	0	0	0
mir430b-20	0	0	0	0	0	0	0	0
tada2b	2.002	0	0	0	0	0	2.002	0
mir430a-17	0	0	0	0	0	0	0	0
mir430a-16	0	0	0	0	0	0	0	0
mir430b-7	0	0	0	0	0	0	0	0
mir430b-8	0	0	0	0	0	0	0	0
mir430b-3	0	0	0	0	0	0	0	0
mir430b-2	0	0	0	0	0	0	0	0
mir430b-19	0	0	0	0	0	0	0	0
mir430a-7	0	0	0	0	0	0	0	0
mir430a-8	0	0	0	0	0	0	0	0
mir430a-3	0	0	0	0	0	0	0	0
mir430a-6	0	0	0	0	0	0	0	0
mir430b-10	0	0	0	0	0	0	0	0
mir430b-5	0	0	0	0	0	0	0	0
mir430b-14	0	0	0	0	0	0	0	0
mir430b-11	0	0	0	0	0	0	0	0
mir430b-17	0	0	0	0	0	0	0	0
mir430b-15	0	0	0	0	0	0	0	0
mir430a-4	0	0	0	0	0	0	0	0
mir430b-4	0	0	0	0	0	0	0	0
mir430c-13	0	0	0	0	0	0	0	0
ftr82	0	1.001	3.005	4.004	6.007	5.006	5.006	6.003
mir430c-15	0	0	0	0	0	0	0	0
ugt2b3	1.001	0	0	0	0	0	0	0
mir430c-11	0	0	0	0	0	0	0	0
chmp4ba	2.002	0	1.002	4.004	3.003	0	1.001	4.002
mir430c-4	0	0	0	0	0	0	0	0
mir430c-7	0	0	0	0	0	0	0	0
ryk	1.001	6.008	2.003	4.004	0	1.001	4.004	0
mir430c-3	0	0	0	0	0	0	0	0
mir430c-16	0	0	0	0	0	0	0	0
mir430c-1	0	0	0	0	0	0	0	0
mir430c-2	0	0	0	0	0	0	0	0
wnt2ba	0	0	1.002	1.001	0	0	0	0
znf1041	0	0	0	0	0	0	0	0
men1	2.002	0	1.002	0	0	0	1.001	1
alg10	0	0	1.002	0	0	0	0	0
trmu	0	1.001	2.003	1.001	0	0	1.001	0
zbed4	0	1.001	1.002	1.001	0	0	1.001	0
alg12	0	0	0	0	0	0	0	0
tnni1d	0	0	0	0	0	0	0	0
LOC794484	2.002	1.001	0	1.001	0	1.001	1.001	1
si:ch211-244b2.1	0	0	0	0	0	0	2.002	0
si:ch211-198n5.11	1.001	2.003	1.002	2.002	0	1.001	1.001	0
fgd6	0	0	0	0	0	0	0	3.001
mir430a-15	0	0	0	0	0	0	0	0
nr2c1	1.001	0	1.002	1.001	0	1.001	2.002	0
ndufa12	18.018	9.013	12.019	12.013	11.012	7.008	6.007	13.006
acot18	1.001	2.003	0	0	1.001	1.001	1.001	2.001
acot15	1.001	3.004	1.002	2.002	1.001	1.001	3.003	1
mtor	2.002	3.004	1.002	1.001	0	5.006	2.002	0
rbm17	1.001	1.001	2.003	0	0	0	0	2.001
pfkfb3	0	0	0	1.001	0	0	2.002	0
tmem110l	0	0	1.002	0	0	0	0	0
kin	0	0	0	0	1.001	1.001	0	0
celf2	0	1.001	0	0	0	0	0	0
cwc22	2.002	2.003	0	0	0	0	0	1
cpm	0	1.001	0	0	0	2.002	1.001	0
mdm2	2.002	1.001	3.005	2.002	1.001	3.004	0	1
gnai1	7.007	2.003	9.014	9.01	5.005	6.007	5.006	4.002
cd36	0	0	0	1.001	0	0	0	0
kdm7aa	0	0	0	0	0	0	0	0
dmap1	0	2.003	2.003	3.003	0	0	0	1
lhfpl3	0	0	0	0	0	0	0	0
llph	1.001	2.003	3.005	0	0	0	2.002	0
mir3906	0	0	0	0	0	0	0	0
rps16	48.047	48.068	44.069	52.057	47.051	48.058	58.064	28.013
nav3	0	0	0	0	0	0	0	1
cacna1c	8.008	4.006	2.003	4.004	3.003	4.005	4.004	7.003
dcp1b	1.001	3.004	4.006	1.001	3.003	0	1.001	2.001
stk38l	0	1.001	0	0	2.002	0	0	0
fgl2a	5.005	11.015	5.008	9.01	4.004	8.01	6.007	6.003
cep83	2.002	1.001	1.002	1.001	1.001	0	0	0
fam3c	2.002	1.001	2.003	1.001	1.001	0	0	3.001
cacna2d1a	2.002	0	1.002	1.001	1.001	2.002	2.002	1
nfkbib	0	0	1.002	1.001	1.001	0	3.003	2.001
snd1	1.001	6.008	7.011	3.003	4.004	5.006	5.006	11.005
lepb	0	0	0	0	0	0	0	0
slc26a3.1	0	0	0	0	0	0	0	0
cdkn1ba	1.001	1.001	1.002	2.002	1.001	1.001	3.003	3.001
rint1	0	0	1.002	0	0	0	1.001	2.001
ncaph2	0	0	0	0	1.001	0	0	0
socs2	0	0	0	1.001	0	0	0	0
uhrf1bp1l	1.001	0	2.003	0	2.002	1.001	1.001	0
anks1b	2.002	4.006	3.005	1.001	0	2.002	2.002	0
apaf1	1.001	2.003	1.002	2.002	0	1.001	2.002	1
kars	21.021	17.024	28.044	28.031	22.024	27.033	15.017	26.012
chpt1	1.001	8.011	7.011	6.007	6.007	5.006	4.004	6.003
washc3	2.002	1.001	1.002	1.001	0	1.001	0	0
nrip2	0	0	0	0	0	1.001	0	0
ascl1a	0	0	0	0	0	0	0	0
grtp1b	0	0	0	0	0	0	0	0
th2	0	0	0	0	0	0	0	0
nup37	1.001	0	0	0	0	0	0	0
strap	2.002	4.006	5.008	3.003	6.007	5.006	3.003	2.001
kiss2	0	0	0	0	0	0	0	0
gys2	0	0	0	0	0	0	0	0
golt1ba	1.001	0	0	2.002	0	1.001	0	0
si:dkey-13i19.8	4.004	4.006	8.012	7.008	3.003	6.007	1.001	5.002
alkbh4	0	0	0	0	0	0	0	0
tcp11l2	2.002	8.011	2.003	2.002	5.005	11.013	1.001	7.003
sema3fa	0	0	0	0	0	0	0	0
sinhcaf	0	1.001	1.002	0	0	0	0	0
caprin2	0	0	0	0	0	0	0	0
btg1	8.008	6.008	9.014	6.007	7.008	6.007	10.011	18.008
dcn	10.01	10.014	17.027	20.022	5.005	4.005	11.012	15.007
kera	0	0	0	0	0	0	0	0
ctsll	0	0	0	0	0	0	0	0
epyc	0	0	0	0	0	1.001	0	0
si:dkeyp-38g8.5	0	1.001	0	1.001	0	0	0	0
mpnd	1.001	0	0	0	0	0	1.001	0
copg2	1.001	1.001	3.005	1.001	1.001	1.001	0	3.001
tpd52l2a	2.002	2.003	3.005	0	3.003	1.001	4.004	1
si:ch211-92l17.1	0	0	0	0	0	0	0	1
chchd3a	3.003	6.008	6.009	6.007	5.005	7.008	8.009	4.002
mir96	0	0	0	0	0	0	0	0
mapk14a	1.001	1.001	1.002	0	1.001	0	1.001	3.001
mir183	0	0	0	0	0	0	0	0
ube2h	5.005	5.007	4.006	7.008	6.007	4.005	8.009	6.003
mlpha	0	0	1.002	0	0	0	0	0
zc3hc1	1.001	1.001	2.003	0	1.001	0	0	0
smo	1.001	1.001	1.002	1.001	0	0	1.001	0
akr1b1	0	0	0	0	0	0	0	0
shisal1a	0	0	0	0	0	0	0	0
egfl6	0	1.001	0	0	0	0	0	0
cmasa	3.003	1.001	0	2.002	1.001	1.001	1.001	0
btr12	0	0	0	0	0	0	0	0
si:dkey-261e22.4	0	0	0	0	0	0	0	0
pus7l	0	0	0	0	0	0	2.002	0
mir430a-18	0	0	0	0	0	0	0	0
pphln1	1.001	0	2.003	0	0	1.001	0	0
gxylt1b	0	0	0	0	0	0	1.001	0
pdzrn4	0	0	0	0	0	0	0	0
lto1	0	1.001	0	1.001	0	0	0	0
nrcama	0	0	0	0	0	0	0	0
calua	2.002	3.004	1.002	1.001	0	1.001	2.002	5.002
arl8	0	1.001	1.002	0	0	1.001	1.001	1
mdm1	0	0	1.002	0	1.001	1.001	0	0
ifng1	0	0	0	0	0	0	0	0
mepce	0	2.003	0	0	0	1.001	1.001	0
si:ch211-266a5.12	0	0	0	0	0	0	0	0
dyrk2	2.002	3.004	2.003	2.002	1.001	1.001	2.002	1
si:dkey-39a18.1	0	0	0	0	0	0	0	0
tmbim4	0	3.004	0	5.006	3.003	2.002	3.003	3.001
vhll	0	0	0	1.001	0	0	1.001	0
hmga2	0	0	0	0	0	0	0	0
arhgef39	0	0	0	0	0	0	0	0
il17ra1a	0	0	0	0	0	0	0	0
nrp2b	0	1.001	1.002	3.003	0	4.005	3.003	1
mkrn1	1.001	5.007	2.003	3.003	1.001	5.006	3.003	4.002
tmem178b	0	0	0	0	0	0	0	0
zgc:136439	1.001	1.001	0	0	1.001	0	0	0
mrps33	4.004	3.004	4.006	3.003	2.002	1.001	4.004	1
mthfd2	2.002	1.001	3.005	2.002	2.002	1.001	2.002	3.001
tnnt2c	1.001	0	0	0	0	0	0	0
cry1aa	4.004	9.013	7.011	9.01	8.009	4.005	7.008	9.004
pou4f3	0	0	0	0	0	0	0	0
btbd11a	1.001	0	1.002	1.001	0	0	2.002	0
podxl	38.037	50.07	25.039	31.034	29.032	39.047	43.047	40.018
mkln1	4.004	1.001	3.005	0	3.003	1.001	1.001	2.001
net1	0	3.004	1.002	1.001	1.001	1.001	0	2.001
asb13a.2	0	0	0	0	0	0	0	0
gdi2	20.02	8.011	13.02	11.012	25.027	15.018	9.01	20.009
gpd2	1.001	0	0	0	1.001	1.001	0	0
sema3aa	0	1.001	0	0	1.001	1.001	0	0
prmt8b	0	0	0	0	0	0	0	0
syt10	0	0	0	0	0	0	0	0
wnt16	0	0	0	0	0	0	0	0
tspan12	3.003	0	1.002	5.006	1.001	3.004	3.003	3.001
sbf1	3.003	2.003	4.006	1.001	1.001	0	1.001	5.002
fbxo18	0	1.001	0	1.001	1.001	0	0	0
glt8d2	0	0	0	0	1.001	0	0	0
hsp90b1	7.007	9.013	2.003	7.008	5.005	7.008	9.01	8.004
si:dkey-153k10.9	0	0	1.002	0	0	0	0	0
dmtf1	0	0	1.002	0	0	0	0	0
meig1	0	0	0	0	0	0	0	0
dclre1c	0	1.001	0	0	0	0	1.001	0
hspa14	4.004	1.001	2.003	4.004	1.001	5.006	4.004	1
lmf2b	0	1.001	0	1.001	1.001	0	1.001	1
hcfc2	0	1.001	0	0	0	0	0	0
dhx38	1.001	0	1.002	0	0	4.005	0	0
nfyba	1.001	5.007	2.003	3.003	4.004	0	2.002	5.002
si:dkey-48p11.3	0	0	0	0	1.001	0	0	0
samm50l	7.007	4.006	8.012	4.004	6.007	4.005	4.004	6.003
nedd8	3.003	4.006	2.003	1.001	3.003	1.001	0	3.001
scube1	0	0	0	0	0	0	1.001	0
fbxl14b	1.001	1.001	2.003	0	0	0	2.002	0
si:ch211-240l19.5	0	0	0	0	0	0	0	0
mvb12bb	0	0	0	0	0	0	0	0
ccdc3a	0	0	0	0	0	0	0	0
si:ch211-272h9.3	0	0	0	0	0	0	0	0
cdc123	2.002	0	1.002	0	0	0	0	1
nudt5	0	0	1.002	2.002	1.001	0	1.001	0
arl6ip5a	1.001	0	1.002	1.001	0	0	0	1
mcm10	1.001	0	0	0	0	0	0	0
kcnj8	0	0	1.002	0	0	0	1.001	0
ucmaa	0	0	0	0	0	0	0	0
si:ch1073-67j19.2	0	0	0	0	0	0	0	0
si:ch1073-67j19.1	0	0	0	0	0	0	0	0
crygm2f	0	0	0	0	0	0	0	0
cdk17	1.001	2.003	0	0	2.002	2.002	1.001	2.001
si:dkey-4e7.3	0	0	0	0	0	0	0	2.001
elk3	1.001	0	2.003	0	0	1.001	1.001	0
gpr143	0	0	0	0	0	0	0	0
hs6st3b	0	0	0	0	0	0	0	0
lta4h	0	0	1.002	1.001	1.001	0	1.001	1
tnnt2e	0	0	1.002	0	0	0	0	0
ugt2b5	0	0	0	0	0	0	0	0
pex26	3.003	0	1.002	1.001	0	1.001	1.001	0
foxm1	0	0	0	1.001	0	0	0	0
pgm3	0	0	0	0	0	0	0	0
yipf6	1.001	0	0	2.002	0	0	1.001	0
pou3f2a	0	0	0	0	0	0	0	0
vegfab	2.002	2.003	8.012	2.002	6.007	4.005	10.011	9.004
selenoo2	0	0	0	0	0	0	0	0
zgc:113263	1.001	2.003	1.002	0	1.001	0	0	2.001
apex1	1.001	1.001	3.005	1.001	0	0	1.001	0
osgep	1.001	0	0	1.001	1.001	0	1.001	1
msi1	0	0	0	0	0	0	0	0
b3gnt3.4	2.002	3.004	3.005	1.001	2.002	0	2.002	2.001
lgr4	1.001	3.004	2.003	2.002	5.005	0	1.001	1
fgf6b	0	0	0	0	0	0	0	0
ahcyl2	3.003	2.003	5.008	3.003	3.003	2.002	2.002	1
ndufa5	5.005	10.014	12.019	8.009	9.01	11.013	4.004	5.002
coa6	8.008	2.003	5.008	6.007	5.005	3.004	3.003	4.002
creb3l2	5.005	1.001	0	5.006	0	1.001	3.003	4.002
LOC101885512	0	0	0	0	0	1.001	0	0
zgc:194209	0	0	0	0	0	0	0	0
gnsa	3.003	2.003	5.008	7.008	1.001	1.001	4.004	1
cd9b	0	0	0	0	0	0	1.001	0
waslb	2.002	2.003	1.002	0	1.001	2.002	1.001	0
gpr37b	0	0	0	0	0	0	0	0
pik3cg	0	2.003	0	1.001	1.001	2.002	3.003	2.001
plekha5	1.001	1.001	2.003	4.004	0	1.001	0	2.001
dus4l	0	0	0	0	0	0	1.001	0
gpr22a	16.016	26.037	19.03	21.023	17.019	12.014	15.017	20.009
fbp1a	4.004	0	0	0	0	1.001	0	0
cog5	0	0	1.002	0	0	0	1.001	0
csrp2	0	0	0	0	0	0	0	0
kcnc2	0	0	0	0	0	0	0	0
camk2d1	0	0	0	0	0	0	0	1
yeats4	0	0	1.002	0	2.002	0	1.001	0
pwp1	1.001	0	0	0	2.002	0	3.003	0
nudt4b	0	1.001	1.002	0	0	0	0	0
dnajc2	0	0	0	0	2.002	0	1.001	1
med21	0	1.001	0	0	0	0	0	0
mtif2	0	0	0	2.002	5.005	2.002	1.001	1
fgfr1op2	5.005	5.007	2.003	3.003	2.002	2.002	4.004	3.001
gas2l3	0	0	0	0	0	1.001	0	1
slc38a2	3.003	8.011	3.005	4.004	7.008	6.007	8.009	5.002
slc38a4	2.002	5.007	1.002	2.002	2.002	3.004	0	2.001
btf3	79.078	76.107	57.089	65.072	103.112	98.118	79.087	66.03
chrm2a	0	0	0	0	1.001	1.001	0	0
nitr3d	0	0	0	0	0	0	0	0
mtpn	6.006	5.007	8.012	6.007	4.004	6.007	4.004	11.005
atp23	1.001	1.001	0	1.001	0	2.002	1.001	0
sim1b	0	0	0	0	0	0	0	0
si:ch211-130m23.2	0	0	0	0	0	0	0	0
mapre3b	8.008	4.006	9.014	2.002	1.001	2.002	2.002	3.001
tmem214	0	2.003	3.005	0	2.002	1.001	0	4.002
fbxo7	2.002	1.001	0	0	3.003	0	1.001	7.003
xpot	5.005	2.003	0	1.001	2.002	5.006	2.002	3.001
[truncated: 13,166 more rows]

## Sheet: WT vs abaKO
	logFC	logCPM	LR	PValue	Test_logCPM	control_logCPM	FDR
mb	0.875583	14.2898	55.0807	1.15683e-13	14.7816	13.9122	1.75434e-09
lgals3bpb	-5.92818	6.53563	19.2983	1.11804e-05	5.31943	7.58261	0.0847754
rsad2	-3.95327	6.75336	18.0662	2.13356e-05	5.64236	7.86073	0.107851
b2ml	-0.919618	9.92297	14.3242	0.000153871	9.44891	10.3368	0.52956
mccc2	2.26665	7.64877	14.0864	0.0001746	8.40976	6.6566	0.52956
ctsla	-1.5495	8.0555	12.7378	0.000358347	7.56862	8.9235	0.825363
cox7c	1.53743	9.16676	12.557	0.000394734	9.74924	8.33383	0.825363
uqcrh	1.37155	8.62254	12.2505	0.000465129	9.07624	7.86407	0.825363
ndufa4l	0.811156	10.0457	11.8797	0.000567494	10.4192	9.64469	0.825363
tnni1b	0.41686	11.3377	11.8049	0.000590762	11.821	11.413	0.825363
mtus1a	-1.92133	7.75336	11.7481	0.000609047	6.7797	8.29045	0.825363
rpl36a	-0.861657	10.1105	11.5979	0.000660248	9.813	10.6521	0.825363
plvapb	5.4925	6.18515	11.3995	0.000734624	7.23032	5.33493	0.825363
acat1	1.81357	7.81869	11.33	0.000762661	8.36481	6.92255	0.825363
zgc:152791	-1.40143	8.85167	11.2036	0.000816383	8.56921	9.88231	0.825363
eif4ebp3l	1.89717	7.59373	11.0388	0.000892239	8.2746	6.79768	0.845675
antxr2b	-5.04211	6.0809	10.6338	0.00111038	5.31943	6.91978	0.961204
gapdhs	1.76607	7.84951	10.5708	0.0011489	8.32172	6.91846	0.961204
pkma	0.776343	9.69322	10.3994	0.00126058	10.0494	9.31126	0.961204
nme2b.2	0.631734	11.6411	10.2322	0.00138009	12.354	11.7335	0.961204
dync1i2a	-5.04878	6.18533	10.2213	0.00138829	5.31943	6.92399	0.961204
hapln1a	5.19297	6.84968	10.2132	0.00139443	7.02017	5.33493	0.961204
asb5b	1.79005	7.41339	9.74759	0.00179558	8.17942	6.79351	0.972766
scd	5.03256	5.96982	9.64785	0.00189573	6.90563	5.33493	0.972766
si:dkey-188i13.10	-1.81225	7.28112	9.50778	0.00204602	6.78045	8.19625	0.972766
znf598	-4.8548	6.18417	9.31319	0.0022751	5.31943	6.79351	0.972766
max	-4.85811	6.45618	9.30069	0.00229068	5.31943	6.79633	0.972766
appbp2	-4.85999	6.23387	9.25872	0.00234377	5.31943	6.79768	0.972766
pcmtd1	-4.86016	6.13444	9.22582	0.00238625	5.31943	6.79768	0.972766
ctps1b	4.84696	5.97003	9.06298	0.00260837	6.78045	5.33493	0.972766
mxa	-4.85599	6.13327	9.03156	0.00265357	5.31943	6.79485	0.972766
chchd6b	1.78583	7.34776	8.89617	0.00285769	8.17717	6.79633	0.972766
stat1b	-2.11241	6.84887	8.7734	0.00305656	6.31956	7.79376	0.972766
ccng2	-4.84848	6.13268	8.62575	0.00331444	5.31943	6.79203	0.972766
socs3a	5.0199	6.27997	8.5626	0.00343139	6.90345	5.33493	0.972766
cox8b	1.07724	9.1189	8.53585	0.00348219	9.82997	8.82259	0.972766
mylk2	-1.36185	7.98527	8.21788	0.00414797	7.32092	8.46471	0.972766
pes	-3.04456	6.41357	8.1969	0.0041962	5.64123	7.14241	0.972766
eef2k	-3.04258	6.85146	8.18692	0.00421936	5.64236	7.14241	0.972766
vmo1a	-3.04254	6.41353	8.17207	0.00425404	5.64236	7.14241	0.972766
sncga	4.84442	5.84937	8.1319	0.00434932	6.7797	5.33493	0.972766
ube2b	-4.64298	6.13363	8.06994	0.00450055	5.31943	6.65797	0.972766
tsfm	-4.64472	5.91169	8.06184	0.00452071	5.31943	6.65949	0.972766
dnajc3b	-4.64149	5.96963	8.05308	0.00454264	5.31943	6.6566	0.972766
sdc4	-4.64149	5.91078	8.052	0.00454535	5.31943	6.6566	0.972766
ctdspl2a	-4.64133	5.84941	8.01287	0.00464461	5.31943	6.6566	0.972766
alas1	1.82503	9.31163	7.99328	0.00469512	10.0122	8.33092	0.972766
psmd4b	4.63208	5.96997	7.93438	0.00485041	6.64254	5.33493	0.972766
zgc:100829	2.01013	6.8499	7.90588	0.00492744	7.71371	6.33591	0.972766
rrm2b	4.63039	5.84912	7.90047	0.0049422	6.64164	5.33493	0.972766
bpgm	3.02407	6.41389	7.88969	0.00497173	7.12827	5.65793	0.972766
cycsb	0.705991	10.2847	7.84909	0.00508464	10.5221	9.8436	0.972766
sdhdb	1.9995	7.47515	7.79196	0.00524792	8.17777	6.65797	0.972766
prkcsh	-4.64048	6.18458	7.78527	0.00526739	5.31943	6.6566	0.972766
slc8a1a	-0.70068	9.88776	7.77181	0.00530678	9.43116	10.1056	0.972766
mat2ab	-3.2841	6.53502	7.72703	0.00544003	5.64236	7.33137	0.972766
supt6h	3.02653	6.57526	7.72018	0.00546071	7.12968	5.65793	0.972766
gdi1	-4.63714	5.91052	7.70736	0.00549962	5.31943	6.65508	0.972766
appa	1.33973	8.13572	7.58859	0.00587388	8.45181	7.33892	0.972766
gpx4b	1.33981	7.75187	7.55876	0.00597192	8.44975	7.33515	0.972766
timmdc1	4.62664	5.91051	7.50713	0.00614553	6.64103	5.33493	0.972766
ednrab	-4.88057	6.28281	7.39034	0.00655751	5.31943	6.80052	0.972766
kdm6bb	-2.12228	7.37306	7.31946	0.00682119	6.31859	7.79827	0.972766
cyc1	0.783389	9.23933	7.31252	0.00684759	9.58869	8.85804	0.972766
isg15	-2.43294	6.81982	7.30609	0.00687212	6.12722	7.73407	0.972766
popdc2	-0.946206	9.65469	7.031	0.00801108	9.15396	10.0587	0.972766
crata	2.43161	6.64911	6.99482	0.0081746	7.32092	5.92215	0.972766
mob1ba	-2.8959	6.18488	6.97977	0.00824362	5.64236	7.03738	0.972766
xrn2	-2.89559	6.23267	6.96027	0.00833393	5.64123	7.03468	0.972766
tnfrsfa	2.87589	6.49589	6.93351	0.00845954	7.02017	5.65641	0.972766
acox1	4.64664	6.13463	6.91166	0.00856352	6.64496	5.33493	0.972766
rpl36	-0.497756	10.2442	6.7869	0.00918293	10.0491	10.536	0.972766
rbpja	-4.39216	6.02741	6.77905	0.00922338	5.31943	6.50661	0.972766
polr2m	4.38121	5.91144	6.72137	0.00952643	6.49089	5.33493	0.972766
si:dkeyp-118b1.2	-4.39451	6.13443	6.72029	0.00953219	5.31943	6.50817	0.972766
mcee	4.37988	6.08121	6.71427	0.00956442	6.48995	5.33493	0.972766
trappc11	-4.38818	6.13328	6.66426	0.00983653	5.31943	6.50364	0.972766
mrpl27	4.38148	6.13399	6.63691	0.00998869	6.49089	5.33493	0.972766
zgc:63831	4.38149	6.32679	6.6317	0.010018	6.49089	5.33493	0.972766
zgc:55262	4.38151	5.84982	6.62482	0.0100568	6.49089	5.33493	0.972766
zmiz1a	-4.39278	5.85005	6.61244	0.0101269	5.31943	6.50661	0.972766
si:ch211-262i1.6	4.38342	6.02739	6.59192	0.0102443	6.49166	5.33493	0.972766
si:ch211-216l23.1	-4.39025	6.37108	6.57513	0.0103413	5.31943	6.5052	0.972766
nrbf2b	4.37955	5.97021	6.57472	0.0103437	6.48995	5.33493	0.972766
coq4	4.37726	5.8491	6.50264	0.0107715	6.48918	5.33493	0.972766
tnnc1a	1.04528	12.0103	6.49906	0.0107932	12.3878	11.3635	0.972766
tmem106ba	-2.90208	6.41514	6.47841	0.0109193	5.64123	7.03868	0.972766
lamp1b	4.37692	5.96944	6.4551	0.0110634	6.48918	5.33493	0.972766
ndufaf5	4.37661	5.91054	6.41032	0.0113459	6.48918	5.33493	0.972766
sdr16c5b	-4.38581	5.78493	6.37609	0.0115668	5.31943	6.50364	0.972766
myom2a	-0.911725	8.75559	6.34109	0.0117972	8.4513	9.29465	0.972766
grpel2	2.31151	6.64871	6.33356	0.0118474	7.22816	5.92041	0.972766
dhx58	-4.38963	5.96993	6.31906	0.0119447	5.31943	6.5052	0.972766
naa50	-2.03708	6.64791	6.29653	0.0120975	6.12722	7.42205	0.972766
stat2	-1.17498	8.68387	6.28071	0.0122059	8.2309	9.31059	0.972766
nr1d2b	1.05686	8.30568	6.27384	0.0122533	8.71503	7.79716	0.972766
pi4kaa	-4.385	6.08091	6.26931	0.0122847	5.31943	6.50364	0.972766
yy1a	-2.32703	6.68378	6.23889	0.0124975	5.90595	7.24002	0.972766
irf2bpl	-4.39924	6.02749	6.21127	0.0126939	5.31943	6.50817	0.972766
klhl13	4.38271	5.78581	6.19687	0.0127976	6.49089	5.33493	0.972766
ndufv1	0.677141	9.42639	6.16192	0.0130529	9.78116	9.14725	0.972766
rps2	-0.254302	12.1439	6.09195	0.01358	12.0077	12.2623	0.972766
tuba1c	-4.39993	6.52599	6.07001	0.0137497	5.31943	6.51542	0.972766
csrp3	0.830142	9.45973	6.04302	0.0139614	9.78176	9.00286	0.972766
spcs2	2.87226	6.36943	5.99251	0.0143667	7.01935	5.65641	0.972766
cox5b2	0.797604	8.72818	5.98568	0.0144225	9.27632	8.54764	0.972766
ubc	-1.20003	8.60269	5.97745	0.0144899	7.64364	8.68794	0.972766
mars	-2.73028	6.13429	5.91399	0.0150211	5.64236	6.92123	0.972766
smad6a	-2.7338	6.2342	5.9105	0.0150509	5.64123	6.92255	0.972766
pepd	-2.72889	6.2334	5.90034	0.015138	5.64236	6.91978	0.972766
rnf145b	2.71035	6.57439	5.88678	0.015255	6.90502	5.65793	0.972766
hbegfa	2.71007	6.18429	5.82481	0.0158016	6.90502	5.65793	0.972766
scrn3	-2.72955	6.37012	5.813	0.0159082	5.64123	6.91846	0.972766
aco2	0.578251	9.8636	5.78926	0.0161244	9.99305	9.44846	0.972766
luc7l3	-2.03955	6.75452	5.77326	0.0162718	6.12904	7.42705	0.972766
psap	-0.899663	8.73558	5.72363	0.0167381	8.36537	9.19073	0.972766
anxa5b	-2.72895	6.18402	5.668	0.0172772	5.64123	6.91846	0.972766
zgc:123068	-1.41164	8.33884	5.64674	0.0174879	8.02099	9.29669	0.972766
atp1a1a.4	-5.17291	5.96837	5.56687	0.0183035	5.31943	7.03068	0.972766
rps3a	-0.290039	11.6268	5.56592	0.0183134	11.4288	11.7194	0.972766
ckba	-2.0322	6.78559	5.53771	0.0186109	6.12803	7.42084	0.972766
rpl15	-0.459188	10.2753	5.53159	0.0186762	10.0769	10.5248	0.972766
nrarpa	1.83441	6.87976	5.50336	0.01898	7.5679	6.33286	0.972766
gnaia	-1.92444	6.57455	5.49793	0.019039	6.12803	7.33637	0.972766
zgc:55582	-4.08664	6.28153	5.49559	0.0190645	5.31943	6.33591	0.972766
rnf103	-4.08665	6.23404	5.48672	0.0191615	5.31943	6.33591	0.972766
vma21	-4.08665	6.18494	5.48649	0.019164	5.31943	6.33591	0.972766
pald1a	-4.08778	6.45722	5.48323	0.0191997	5.31943	6.33734	0.972766
cmya5	-4.08665	6.0269	5.47589	0.0192805	5.31943	6.33591	0.972766
psma8	1.53584	7.15923	5.46182	0.0194364	7.78051	6.6566	0.972766
pmpcb	2.17742	6.53626	5.45914	0.0194662	7.12887	5.92041	0.972766
tesk2	-4.08808	5.971	5.45763	0.019483	5.31943	6.33734	0.972766
zfyve27	-4.08667	5.78589	5.4552	0.0195102	5.31943	6.33591	0.972766
rhbdf1a	-2.19519	6.5738	5.45339	0.0195304	5.90512	7.14103	0.972766
stx12	-4.08497	6.027	5.45326	0.0195319	5.31943	6.33429	0.972766
acad9	2.71012	6.32647	5.4518	0.0195482	6.90563	5.65793	0.972766
gpcpd1	-4.08667	5.91146	5.45015	0.0195667	5.31943	6.33591	0.972766
exosc10	-4.08667	6.13365	5.45008	0.0195675	5.31943	6.33591	0.972766
garem	-4.08667	5.78581	5.44878	0.019582	5.31943	6.33591	0.972766
mrrf	-4.08822	5.91166	5.44462	0.0196287	5.31943	6.33734	0.972766
adrb3a	-4.08823	5.91198	5.44448	0.0196303	5.31943	6.33734	0.972766
mrps21	-4.08823	5.91178	5.44437	0.0196315	5.31943	6.33734	0.972766
mxb	-4.09026	5.64895	5.44376	0.0196383	5.31943	6.33895	0.972766
lpgat1	-4.0883	5.91179	5.43821	0.0197009	5.31943	6.33734	0.972766
kdm6al	-4.08479	6.08104	5.43436	0.0197443	5.31943	6.33429	0.972766
kat14	-4.08668	5.84986	5.43415	0.0197467	5.31943	6.33591	0.972766
si:ch211-244b2.3	-4.08668	5.64808	5.43371	0.0197516	5.31943	6.33591	0.972766
bpnt1	-4.08477	5.84957	5.43302	0.0197595	5.31943	6.33429	0.972766
adgrl4	-4.08477	5.78543	5.43285	0.0197614	5.31943	6.33429	0.972766
fam222ba	-4.08837	6.08193	5.43143	0.0197775	5.31943	6.33734	0.972766
slc39a13	-4.0884	5.91185	5.42869	0.0198085	5.31943	6.33734	0.972766
mpi	-4.08473	5.6476	5.42804	0.0198159	5.31943	6.33429	0.972766
lpcat4	-4.08473	5.6476	5.42804	0.0198159	5.31943	6.33429	0.972766
setd7	-4.08842	5.78596	5.42747	0.0198224	5.31943	6.33734	0.972766
cdh17	-4.08311	5.64721	5.4237	0.0198652	5.31943	6.33286	0.972766
waca	4.07574	6.23373	5.42105	0.0198954	6.32035	5.33493	0.972766
ppil4	4.3644	5.78475	5.41085	0.020012	6.48841	5.33493	0.972766
higd1a	1.53851	7.64954	5.40841	0.02004	7.78247	6.6566	0.972766
cwc22	-4.0867	5.71848	5.40629	0.0200644	5.31943	6.33591	0.972766
tbx5b	4.07575	5.84958	5.40396	0.0200911	6.32035	5.33493	0.972766
rif1	-4.0867	6.02691	5.40013	0.0201353	5.31943	6.33591	0.972766
zgc:110158	4.07725	5.91158	5.3973	0.0201679	6.32132	5.33493	0.972766
pdgfra	4.07576	6.08098	5.39408	0.0202051	6.32035	5.33493	0.972766
smpd5	4.07576	5.91107	5.3938	0.0202085	6.32035	5.33493	0.972766
pcdh1g1	-4.07582	5.64577	5.39152	0.0202349	5.31943	6.33015	0.972766
si:ch211-206k20.5	4.07576	5.91119	5.38377	0.0203249	6.32035	5.33493	0.972766
coasy	4.07454	6.0265	5.38268	0.0203376	6.31956	5.33493	0.972766
slc37a4b	4.07577	5.78549	5.37236	0.0204583	6.32035	5.33493	0.972766
gpat4	4.07577	5.64787	5.3718	0.0204649	6.32035	5.33493	0.972766
mfsd2aa	4.07577	5.64787	5.3718	0.0204649	6.32035	5.33493	0.972766
polr1b	4.07577	5.64787	5.3718	0.0204649	6.32035	5.33493	0.972766
nubp1	4.07577	5.84995	5.3714	0.0204695	6.32035	5.33493	0.972766
si:dkey-58f10.7	4.07442	5.64754	5.36821	0.020507	6.31956	5.33493	0.972766
pon3.1	4.07442	5.64754	5.36821	0.020507	6.31956	5.33493	0.972766
quo	4.07577	5.84983	5.36775	0.0205125	6.32035	5.33493	0.972766
gnl3l	-2.20057	6.37202	5.3677	0.0205131	5.90512	7.14633	0.972766
skia	2.18	6.78606	5.36635	0.0205289	7.12968	5.91892	0.972766
insrb	-4.08413	5.78555	5.36371	0.0205599	5.31943	6.33429	0.972766
tram1	4.07758	6.02732	5.36234	0.0205761	6.32132	5.33493	0.972766
rasgef1bb	4.07436	6.23329	5.3605	0.0205978	6.31956	5.33493	0.972766
myoz2a	4.0776	6.08178	5.36045	0.0205985	6.32132	5.33493	0.972766
map2k6	2.86433	6.45533	5.35707	0.0206384	7.01935	5.65793	0.972766
flt4	4.07426	5.91061	5.3477	0.0207496	6.31956	5.33493	0.972766
daam1b	4.07578	6.23396	5.34738	0.0207534	6.32035	5.33493	0.972766
chrac1	4.07773	5.78588	5.34654	0.0207634	6.32132	5.33493	0.972766
zgc:112271	4.07424	5.91066	5.34564	0.0207742	6.31956	5.33493	0.972766
ralba	-1.25546	7.64984	5.34533	0.0207778	7.12827	8.14716	0.972766
rchy1	4.07578	5.71823	5.34408	0.0207927	6.32035	5.33493	0.972766
skib	4.07777	6.02714	5.34223	0.0208148	6.32132	5.33493	0.972766
hsc70	-0.718385	9.36816	5.33858	0.0208585	8.81062	9.48714	0.972766
rnf139	-4.0839	5.91113	5.33774	0.0208686	5.31943	6.33429	0.972766
zgc:101016	4.07578	5.71823	5.33124	0.0209465	6.32035	5.33493	0.972766
pex13	4.07579	5.84978	5.32445	0.0210283	6.32035	5.33493	0.972766
ccnq	-4.08374	5.78523	5.32011	0.0210806	5.31943	6.33429	0.972766
gstk4	4.07798	5.97018	5.3186	0.0210989	6.32132	5.33493	0.972766
stk17b	4.07579	5.91143	5.31684	0.0211202	6.32035	5.33493	0.972766
cib1	-4.08968	5.91154	5.3111	0.02119	5.31943	6.33734	0.972766
cox6b1	0.953295	8.69078	5.29171	0.0214272	9.04696	8.19012	0.972766
tln2a	2.01171	6.68299	5.29081	0.0214383	7.40598	6.14223	0.972766
kdelr2b	4.07834	5.91207	5.279	0.0215842	6.32132	5.33493	0.972766
dnaja1	-4.08337	5.96984	5.278	0.0215965	5.31943	6.33429	0.972766
podxl	-0.664508	9.60942	5.26341	0.0217783	9.22708	9.86385	0.972766
hps4	4.07358	5.7179	5.26016	0.021819	6.31956	5.33493	0.972766
lgals3b	1.90072	7.10794	5.25625	0.021868	7.31948	6.1439	0.972766
hspb3	4.07348	5.78515	5.24661	0.0219895	6.31956	5.33493	0.972766
smc1al	-1.86289	7.34994	5.23349	0.022156	6.31859	7.58626	0.972766
dcun1d4	-4.09049	6.18551	5.2317	0.0221788	5.31943	6.33734	0.972766
lsg1	4.07584	5.9113	5.1962	0.0226363	6.32035	5.33493	0.972766
irf2bp2a	-1.47484	7.25852	5.16239	0.0230811	6.6433	7.72829	0.972766
snrpd2	4.07586	5.91089	5.15114	0.0232312	6.32035	5.33493	0.972766
ddost	2.70575	6.23201	5.1308	0.0235049	6.90345	5.65641	0.972766
si:dkey-188i13.9	-1.7385	6.81944	5.12647	0.0235636	6.48918	7.73294	0.972766
wnt5b	4.07967	5.71868	5.12095	0.0236386	6.32132	5.33493	0.972766
trioa	4.08351	5.8503	5.10598	0.0238435	6.32211	5.33493	0.972766
tes	-4.08689	5.97007	5.08327	0.0241577	5.31943	6.33591	0.972766
pkdcca	-4.08165	5.78518	5.07095	0.02433	5.31943	6.33429	0.972766
naa10	1.90449	6.78659	5.06741	0.0243798	7.32228	6.1439	0.972766
slc30a9	-4.08162	6.3716	5.06664	0.0243906	5.31943	6.33429	0.972766
rpl31	-0.487716	10.3657	5.05616	0.0245385	10.1518	10.6303	0.972766
mcts1	4.0759	6.23319	5.05607	0.0245399	6.32035	5.33493	0.972766
fip1l1b	4.0759	6.13376	5.05189	0.0245991	6.32035	5.33493	0.972766
ckmt2a	0.851256	8.72859	5.03485	0.0248423	8.84578	8.09001	0.972766
rab40b	4.07591	6.13406	5.03363	0.0248598	6.32035	5.33493	0.972766
lypla2	2.17234	6.45616	5.02443	0.0249921	7.12747	5.92215	0.972766
cox5aa	0.770006	8.94171	5.02085	0.0250439	9.07581	8.3778	0.972766
rsrp1	-0.96162	8.44681	5.01778	0.0250883	7.90858	8.76023	0.972766
nceh1a	4.06733	6.0804	4.99814	0.0253746	6.31859	5.33493	0.972766
boc	4.07592	6.0268	4.98937	0.0255035	6.32035	5.33493	0.972766
rps9	-0.440675	11.2163	4.96302	0.025895	11.0496	11.4874	0.972766
cldnc	-4.09324	5.78608	4.93295	0.0263493	5.31943	6.33734	0.972766
gpr182	-1.54861	7.02784	4.91921	0.0265597	6.49089	7.58386	0.972766
slka	-2.54332	6.28124	4.90946	0.02671	5.64236	6.79485	0.972766
ift74	-2.54533	6.37114	4.90385	0.0267968	5.64123	6.79485	0.972766
rps8a	-0.30404	11.1526	4.90276	0.0268139	11.0833	11.3855	0.972766
ell	-2.20627	6.85172	4.90161	0.0268316	5.90406	7.14633	0.972766
eprs	-1.54794	6.94187	4.89272	0.0269701	6.49166	7.58386	0.972766
iba57	-2.54663	6.28084	4.8906	0.0270034	5.64123	6.79633	0.972766
iars	-2.54533	6.23292	4.89057	0.0270038	5.64123	6.79485	0.972766
sema3d	4.07099	5.84913	4.88734	0.0270544	6.31956	5.33493	0.972766
ftr82	2.52447	6.85084	4.88117	0.0271512	6.7797	5.65793	0.972766
hsp70l	-4.07388	6.1189	4.8703	0.0273228	5.31943	6.33286	0.972766
pkz	-2.54534	6.1333	4.86007	0.0274853	5.64123	6.79485	0.972766
tomm70a	-2.54812	6.23385	4.85615	0.0275478	5.64123	6.79768	0.972766
vps16	-2.54408	6.23266	4.84298	0.0277589	5.64123	6.79351	0.972766
si:dkey-276j7.1	-2.54408	6.1331	4.84186	0.0277769	5.64123	6.79351	0.972766
psmc2	2.52604	6.45553	4.82682	0.0280203	6.78045	5.65641	0.972766
tuba1b	0.636189	9.21423	4.8245	0.028058	9.52867	8.93525	0.972766
plekhj1	-2.54592	6.18549	4.82369	0.0280711	5.64236	6.79768	0.972766
ctbp1	-2.74385	6.41502	4.82297	0.028083	5.64123	6.92387	0.972766
xpot	-2.54399	6.49653	4.82168	0.0281039	5.64123	6.79351	0.972766
tmtc2a	4.07598	5.78536	4.82124	0.0281111	6.32035	5.33493	0.972766
magi1b	4.08772	6.13469	4.81712	0.0281784	6.32211	5.33493	0.972766
srgap2	-4.07972	5.91069	4.81025	0.0282909	5.31943	6.33429	0.972766
mrpl20	2.525	6.23361	4.80776	0.0283319	6.78045	5.65793	0.972766
smx5	2.52624	6.02638	4.78797	0.0286591	6.78045	5.65641	0.972766
cox6b2	0.542667	9.66716	4.78006	0.0287911	9.93729	9.42193	0.972766
si:ch211-107o10.3	4.076	5.71836	4.77701	0.0288422	6.32035	5.33493	0.972766
tom1l2	2.524	6.81835	4.77083	0.0289458	6.7797	5.65793	0.972766
tdh	1.32386	8.09533	4.76518	0.0290411	8.32172	7.24002	0.972766
dnm2b	2.70429	6.02526	4.74314	0.0294153	6.90345	5.65641	0.972766
zgc:136864	-1.64981	6.68412	4.69784	0.0302005	6.32132	7.42325	0.972766
ppp2r5ea	2.5241	6.13303	4.69425	0.0302636	6.77896	5.65641	0.972766
tbc1d16	-2.04911	6.71911	4.68254	0.0304707	5.90512	7.03609	0.972766
cox4i1	0.403244	10.3901	4.67718	0.030566	10.6069	10.2176	0.972766
cdh5	-1.41726	7.47778	4.66027	0.0308683	6.78206	7.86073	0.972766
si:ch211-239e6.4	2.52491	6.18504	4.65019	0.0310501	6.78045	5.65793	0.972766
gsk3aa	4.08303	5.78608	4.64926	0.0310669	6.32132	5.33493	0.972766
srsf6a	-1.80198	6.61274	4.64183	0.0312017	6.12803	7.24387	0.972766
got2a	0.554124	10.2787	4.6299	0.0314194	10.3555	9.82361	0.972766
cox7b	0.874553	8.86606	4.61949	0.0316106	9.388	8.58478	0.972766
aste1a	-2.05049	6.57436	4.61328	0.0317253	5.90406	7.03609	0.972766
sos1	-2.53992	6.37082	4.60874	0.0318094	5.64236	6.79351	0.972766
si:busm1-57f23.1	-4.10507	5.97121	4.60649	0.0318511	5.31943	6.33895	0.972766
fbxo34	-1.62913	7.05626	4.59883	0.0319937	6.64496	7.86183	0.972766
2023-03-07	2.52222	6.37026	4.59005	0.032158	6.77822	5.65641	0.972766
phykpl	4.06184	5.78483	4.55074	0.0329044	6.31859	5.33493	0.972766
reep5	1.77953	6.94105	4.54906	0.0329369	7.22668	6.14244	0.972766
kdr	2.02979	6.85028	4.52897	0.0333256	7.02231	5.92041	0.972766
mrps24	-2.05195	6.37058	4.5233	0.0334363	5.90406	7.03738	0.972766
ckma	0.537744	12.634	4.52113	0.0334786	13.158	12.6311	0.972766
sema3ab	-4.10628	5.91218	4.51679	0.0335638	5.31943	6.33895	0.972766
tpt1	-0.248797	11.8329	4.51421	0.0336145	11.6024	11.8519	0.972766
lsm14ab	-1.79873	7.10798	4.51319	0.0336344	6.12803	7.24002	0.972766
dcn	0.867628	8.08037	4.50668	0.0337626	8.67812	7.9216	0.972766
adipor2	2.0291	6.71926	4.5016	0.0338631	7.0216	5.92041	0.972766
zgc:92429	-2.04925	6.3699	4.49751	0.0339442	5.90406	7.03468	0.972766
rps3	-0.297975	11.2994	4.48609	0.0341718	11.1987	11.4947	0.972766
scp2b	1.15241	7.51577	4.48087	0.0342763	8.17827	7.24521	0.972766
fam210aa	2.02737	6.32583	4.46449	0.0346064	7.02017	5.92041	0.972766
ndufb10	0.861297	8.99879	4.46436	0.0346091	9.29581	8.50677	0.972766
tfpia	1.02824	7.70125	4.44516	0.0350004	8.2746	7.42455	0.972766
ptpn11a	4.06044	5.84893	4.42052	0.0355093	6.31859	5.33493	0.972766
uqcrq	0.790226	8.33723	4.40836	0.0357632	8.84487	8.142	0.972766
eif3i	-1.06963	8.64005	4.40512	0.0358311	7.90479	8.85644	0.972766
klhl4	-4.07716	6.53591	4.4048	0.0358379	5.31943	6.33429	0.972766
pnisr	-1.9173	7.02788	4.38855	0.036181	6.12904	7.33515	0.972766
slc25a33	1.08553	7.51626	4.3843	0.0362714	8.22697	7.33892	0.972766
rrad	-0.982681	8.54786	4.34641	0.0370871	8.22751	9.12165	0.972766
cited4b	-1.80051	6.61176	4.3451	0.0371157	6.12722	7.24137	0.972766
sephs2	-1.79891	6.7525	4.29904	0.0381339	6.12803	7.24137	0.972766
uqcrc1	0.589676	9.20468	4.29584	0.0382057	9.64367	9.09409	0.972766
eci2	1.21678	7.83614	4.28593	0.0384291	8.23036	7.24262	0.972766
smyd2b	-1.39141	7.16061	4.28482	0.0384542	6.64254	7.66082	0.972766
mdh1aa	0.477501	11.4802	4.27965	0.0385713	11.6002	11.1325	0.972766
gab1	2.02946	6.75318	4.27114	0.038765	7.0216	5.92041	0.972766
dync1h1	-0.915967	8.13534	4.25541	0.0391256	7.71171	8.50858	0.972766
ldha	0.611428	9.71509	4.25297	0.0391817	10.0056	9.42645	0.972766
rps19	-0.480392	9.74255	4.24173	0.0394419	9.53153	9.99513	0.972766
ahr2	-1.04251	8.0425	4.23866	0.0395132	7.57126	8.46563	0.972766
arglu1b	-1.79858	6.68345	4.22612	0.0398064	6.12803	7.24137	0.972766
atp1a1a.1	-0.59634	9.71676	4.18126	0.0408734	9.40957	9.98399	0.972766
fbp1a	-4.06507	5.71782	4.1739	0.0410511	5.31943	6.33286	0.972766
si:dkey-20d21.12	1.367	7.05492	4.17305	0.0410718	7.64364	6.65949	0.972766
si:ch211-248e11.2	4.09503	5.85093	4.16899	0.0411702	6.32211	5.33493	0.972766
slc6a4a	0.836069	8.47608	4.1536	0.0415461	8.9927	8.24264	0.972766
filip1l	1.44642	6.99832	4.15323	0.0415551	7.71109	6.65949	0.972766
arl8a	-3.69875	6.23338	4.13084	0.0421084	5.31943	6.14223	0.972766
tmem47	1.45586	7.05531	4.12697	0.0422049	7.7144	6.65797	0.972766
spry2	-3.69871	6.0267	4.12515	0.0422502	5.31943	6.14223	0.972766
yes1	-3.70039	6.02702	4.123	0.0423039	5.31943	6.1439	0.972766
cdk17	-3.7004	6.02739	4.12281	0.0423088	5.31943	6.1439	0.972766
socs5a	-3.70041	6.23417	4.12172	0.042336	5.31943	6.1439	0.972766
gja3	-3.69861	5.97035	4.11379	0.042535	5.31943	6.14223	0.972766
lrrc17	-3.69861	5.8497	4.11374	0.0425362	5.31943	6.14223	0.972766
cishb	-3.7005	5.91163	4.1134	0.0425448	5.31943	6.1439	0.972766
faf2	-3.69861	5.84995	4.1132	0.0425498	5.31943	6.14223	0.972766
gdap2	-3.70054	5.85003	4.1094	0.0426454	5.31943	6.1439	0.972766
macrod2	-3.70054	5.85023	4.10917	0.0426514	5.31943	6.1439	0.972766
c1qa	-3.70054	5.78594	4.10904	0.0426546	5.31943	6.1439	0.972766
pfdn1	-3.70054	5.71893	4.10883	0.0426599	5.31943	6.1439	0.972766
si:ch211-191j22.3	-3.70054	5.71886	4.10873	0.0426624	5.31943	6.1439	0.972766
nup88	-3.70055	5.71881	4.10859	0.0426659	5.31943	6.1439	0.972766
ntn1b	-3.70223	5.57463	4.10811	0.0426781	5.31943	6.14536	0.972766
zgc:174653	-3.70223	5.57463	4.10811	0.0426781	5.31943	6.14536	0.972766
zgc:174696	-3.70223	5.57463	4.10811	0.0426781	5.31943	6.14536	0.972766
zgc:85789	-3.69855	5.84982	4.10624	0.0427253	5.31943	6.14223	0.972766
mapk4	-3.69854	5.78548	4.10582	0.0427359	5.31943	6.14223	0.972766
fbxw2	-3.69854	5.78548	4.10582	0.0427359	5.31943	6.14223	0.972766
hmga1b	-3.69854	5.71827	4.10539	0.0427468	5.31943	6.14223	0.972766
gpatch3	-3.70059	5.78606	4.10479	0.0427618	5.31943	6.1439	0.972766
znhit1	-3.70059	5.6482	4.10474	0.042763	5.31943	6.1439	0.972766
ftr50	-3.70059	5.57423	4.10474	0.042763	5.31943	6.1439	0.972766
exosc4	-3.70059	5.64833	4.10474	0.042763	5.31943	6.1439	0.972766
actr6	-3.70059	5.64833	4.10474	0.042763	5.31943	6.1439	0.972766
gtpbp1l	-3.70059	5.64845	4.10474	0.042763	5.31943	6.1439	0.972766
cmtm7	-3.70059	5.57423	4.10474	0.042763	5.31943	6.1439	0.972766
emg1	-3.70059	5.57423	4.10474	0.042763	5.31943	6.1439	0.972766
zgc:153675	-3.70059	5.57423	4.10474	0.042763	5.31943	6.1439	0.972766
taf6l	-3.70059	5.57423	4.10474	0.042763	5.31943	6.1439	0.972766
supt3h	-3.70059	5.57423	4.10474	0.042763	5.31943	6.1439	0.972766
bub3	-3.70059	5.6482	4.10474	0.042763	5.31943	6.1439	0.972766
ephb3a	-3.70059	5.78569	4.10463	0.0427661	5.31943	6.1439	0.972766
fam192a	-3.7006	5.91188	4.10386	0.0427854	5.31943	6.1439	0.972766
ninl	-3.70014	5.64817	4.1034	0.042797	5.31943	6.14369	0.972766
sec23ip	-3.69851	5.91126	4.10115	0.042854	5.31943	6.14223	0.972766
zgc:158316	-3.6985	5.71839	4.10082	0.0428623	5.31943	6.14223	0.972766
zgc:66474	-3.6985	5.71822	4.10079	0.0428632	5.31943	6.14223	0.972766
cdc34b	-3.70063	5.78601	4.10059	0.0428683	5.31943	6.1439	0.972766
mpeg1.1	-3.6985	5.64778	4.10005	0.042882	5.31943	6.14223	0.972766
nelfcd	-3.6985	5.64786	4.10005	0.042882	5.31943	6.14223	0.972766
eef2a.1	-3.6985	5.57375	4.10005	0.042882	5.31943	6.14223	0.972766
pdcd10b	-3.6985	5.64786	4.10005	0.042882	5.31943	6.14223	0.972766
prr5a	-3.6985	5.64778	4.10005	0.042882	5.31943	6.14223	0.972766
trim13	-3.6985	5.64778	4.10005	0.042882	5.31943	6.14223	0.972766
stx11a	-3.6985	5.57375	4.10005	0.042882	5.31943	6.14223	0.972766
aifm2	-3.6985	5.64786	4.10005	0.042882	5.31943	6.14223	0.972766
nup62l	-3.70064	5.85027	4.09957	0.0428941	5.31943	6.1439	0.972766
polr3c	-3.70064	5.78577	4.0993	0.042901	5.31943	6.1439	0.972766
scyl3	-3.70066	6.02726	4.09788	0.042937	5.31943	6.1439	0.972766
si:ch211-51h9.7	-3.69685	5.57335	4.0967	0.0429671	5.31943	6.14077	0.972766
si:busm1-266f07.2	-3.69685	5.57335	4.0967	0.0429671	5.31943	6.14077	0.972766
eipr1	-3.69685	5.57335	4.0967	0.0429671	5.31943	6.14077	0.972766
si:dkey-266f7.5	-3.69685	5.57335	4.0967	0.0429671	5.31943	6.14077	0.972766
rhof	-3.69685	5.57335	4.0967	0.0429671	5.31943	6.14077	0.972766
LOC792137	-3.69685	5.64738	4.0967	0.0429671	5.31943	6.14077	0.972766
npr3	-3.69685	5.64758	4.0967	0.0429671	5.31943	6.14077	0.972766
snrpb2	-3.69685	5.57335	4.0967	0.0429671	5.31943	6.14077	0.972766
stmn1b	-3.69685	5.64733	4.0967	0.0429671	5.31943	6.14077	0.972766
lrsam1	-3.69685	5.64733	4.0967	0.0429671	5.31943	6.14077	0.972766
zgc:101858	-3.69685	5.64733	4.0967	0.0429671	5.31943	6.14077	0.972766
isoc2	-3.69847	5.84965	4.09664	0.0429684	5.31943	6.14223	0.972766
seh1l	-3.7007	5.71873	4.09413	0.0430324	5.31943	6.1439	0.972766
cnot9	-3.69842	5.71827	4.09061	0.043122	5.31943	6.14223	0.972766
mgrn1b	-3.70074	5.78614	4.09014	0.043134	5.31943	6.1439	0.972766
camk2b1	-1.12737	7.41427	4.08841	0.0431783	7.12887	8.03501	0.972766
mre11a	-3.69837	5.71827	4.0853	0.0432578	5.31943	6.14223	0.972766
vwa8	-3.69837	5.84952	4.08482	0.0432702	5.31943	6.14223	0.972766
idi1	-3.69836	5.78547	4.08372	0.0432983	5.31943	6.14223	0.972766
ech1	3.68955	6.13414	4.08076	0.0433742	6.12803	5.33493	0.972766
rnaset2	-3.70084	5.71856	4.08052	0.0433804	5.31943	6.1439	0.972766
retreg2	-3.70084	5.78619	4.08046	0.0433819	5.31943	6.1439	0.972766
brms1	-3.69833	5.91106	4.08008	0.0433917	5.31943	6.14223	0.972766
runx1t1	-3.70085	5.85039	4.07877	0.0434251	5.31943	6.1439	0.972766
zgc:158234	3.68855	6.37153	4.07836	0.0434359	6.12722	5.33493	0.972766
si:dkey-156n14.5	-1.86616	7.50008	4.0783	0.0434374	6.32035	7.5886	0.972766
kdsr	-3.70087	5.71873	4.07708	0.0434688	5.31943	6.1439	0.972766
mrpl53	-3.69831	5.78559	4.07694	0.0434723	5.31943	6.14223	0.972766
fam129bb	3.68959	5.91133	4.0753	0.0435146	6.12803	5.33493	0.972766
trafd1	3.68852	5.97047	4.07366	0.0435568	6.12722	5.33493	0.972766
mms19	-3.70091	5.97054	4.07277	0.0435799	5.31943	6.1439	0.972766
ndrg2	-3.70092	5.91151	4.07233	0.043591	5.31943	6.1439	0.972766
cwf19l1	-3.70092	5.71906	4.07201	0.0435995	5.31943	6.1439	0.972766
cryl1	-3.69826	5.91149	4.0712	0.0436202	5.31943	6.14223	0.972766
cox11	3.68965	5.78588	4.06952	0.0436636	6.12803	5.33493	0.972766
baxa	3.68848	5.9704	4.06826	0.0436964	6.12722	5.33493	0.972766
dnajb1b	3.68848	6.13412	4.06812	0.0436998	6.12722	5.33493	0.972766
gstm.3	-1.25658	7.75087	4.06797	0.0437038	7.32025	8.37399	0.972766
bud23	3.68847	5.7853	4.06786	0.0437065	6.12722	5.33493	0.972766
pkp2	-3.70345	5.78621	4.06762	0.0437129	5.31943	6.14536	0.972766
map2k2b	-3.69823	5.71827	4.06755	0.0437145	5.31943	6.14223	0.972766
rpe	3.68968	5.85009	4.06585	0.0437587	6.12803	5.33493	0.972766
plpp7	-3.70099	5.91163	4.06556	0.0437662	5.31943	6.1439	0.972766
adck5	3.68845	5.84989	4.06396	0.0438077	6.12722	5.33493	0.972766
snx27b	3.68971	5.78588	4.06238	0.0438486	6.12803	5.33493	0.972766
rbp5	3.68971	5.71862	4.06174	0.0438652	6.12803	5.33493	0.972766
senp3a	3.69156	5.64842	4.06168	0.0438667	6.12904	5.33493	0.972766
zgc:174710	3.69156	5.64867	4.06168	0.0438667	6.12904	5.33493	0.972766
stim1a	3.69156	5.64855	4.06168	0.0438667	6.12904	5.33493	0.972766
mto1	3.69156	5.64855	4.06168	0.0438667	6.12904	5.33493	0.972766
si:ch73-127m5.2	3.69156	5.64847	4.06168	0.0438667	6.12904	5.33493	0.972766
ehhadh	-3.69594	5.84906	4.06071	0.0438919	5.31943	6.14077	0.972766
tradd	3.68842	5.78555	4.0604	0.0439001	6.12722	5.33493	0.972766
bag6	-3.70104	6.57561	4.05986	0.0439141	5.31943	6.1439	0.972766
decr2	3.68975	5.64814	4.05759	0.0439733	6.12803	5.33493	0.972766
rergla	3.68975	5.64802	4.05759	0.0439733	6.12803	5.33493	0.972766
rxrbb	3.68975	5.64826	4.05759	0.0439733	6.12803	5.33493	0.972766
fbxl15	3.68975	5.64826	4.05759	0.0439733	6.12803	5.33493	0.972766
hebp2	3.68975	5.64814	4.05759	0.0439733	6.12803	5.33493	0.972766
amt	3.68975	5.57404	4.05759	0.0439733	6.12803	5.33493	0.972766
gtf2h3	3.68975	5.57404	4.05759	0.0439733	6.12803	5.33493	0.972766
rab3ab	3.68975	5.64806	4.05759	0.0439733	6.12803	5.33493	0.972766
gtf3c6	3.68975	5.64806	4.05759	0.0439733	6.12803	5.33493	0.972766
tada2a	3.68975	5.57404	4.05759	0.0439733	6.12803	5.33493	0.972766
ube3b	3.68975	5.57404	4.05759	0.0439733	6.12803	5.33493	0.972766
ccpg1	3.68975	5.57404	4.05759	0.0439733	6.12803	5.33493	0.972766
ankrd12	3.68975	5.57404	4.05759	0.0439733	6.12803	5.33493	0.972766
sema3e	3.68975	5.7185	4.05722	0.0439828	6.12803	5.33493	0.972766
tnni4b.3	3.68976	6.81997	4.05605	0.0440132	6.12803	5.33493	0.972766
nudt5	3.68839	5.71817	4.05568	0.044023	6.12722	5.33493	0.972766
st5	3.68838	5.64773	4.05482	0.0440454	6.12722	5.33493	0.972766
cth	3.68838	5.64773	4.05482	0.0440454	6.12722	5.33493	0.972766
unc50	3.68838	5.5737	4.05482	0.0440454	6.12722	5.33493	0.972766
ap3s2	3.68838	5.5737	4.05482	0.0440454	6.12722	5.33493	0.972766
krr1	3.68838	5.64773	4.05482	0.0440454	6.12722	5.33493	0.972766
atic	3.68838	5.5737	4.05482	0.0440454	6.12722	5.33493	0.972766
selenoh	3.68838	5.5737	4.05482	0.0440454	6.12722	5.33493	0.972766
desi1b	3.68838	5.5737	4.05482	0.0440454	6.12722	5.33493	0.972766
prrg4	3.68838	5.5737	4.05482	0.0440454	6.12722	5.33493	0.972766
smim15	3.68838	5.64768	4.05482	0.0440454	6.12722	5.33493	0.972766
abcf2a	3.68838	5.64793	4.05482	0.0440454	6.12722	5.33493	0.972766
tusc2a	3.68838	5.64793	4.05482	0.0440454	6.12722	5.33493	0.972766
fam3a	-3.7011	5.8501	4.05473	0.0440477	5.31943	6.1439	0.972766
ppp3ccb	3.68978	6.02714	4.05373	0.0440738	6.12803	5.33493	0.972766
zgc:193505	-3.70111	5.71861	4.05306	0.0440912	5.31943	6.1439	0.972766
tmem18	3.68979	5.71842	4.05219	0.0441141	6.12803	5.33493	0.972766
srek1	3.68836	5.91107	4.05189	0.0441219	6.12722	5.33493	0.972766
cybrd1	3.68835	5.78562	4.05106	0.0441435	6.12722	5.33493	0.972766
ssx2ipa	3.68657	5.64732	4.05073	0.0441522	6.12621	5.33493	0.972766
mybl2a	3.68657	5.57329	4.05073	0.0441522	6.12621	5.33493	0.972766
syk	3.68657	5.64732	4.05073	0.0441522	6.12621	5.33493	0.972766
rp2	3.68657	5.57329	4.05073	0.0441522	6.12621	5.33493	0.972766
asap3	3.68657	5.64732	4.05073	0.0441522	6.12621	5.33493	0.972766
acsm3	3.68835	5.71834	4.05051	0.044158	6.12722	5.33493	0.972766
b4galnt1a	3.68835	5.97009	4.04986	0.044175	6.12722	5.33493	0.972766
ptpn11b	3.68654	6.02613	4.04912	0.0441943	6.12621	5.33493	0.972766
rps6ka3a	-3.69808	5.71834	4.04862	0.0442075	5.31943	6.14223	0.972766
ubtfl	3.68651	6.0812	4.04814	0.04422	6.12621	5.33493	0.972766
abca5	3.68983	5.71855	4.04754	0.0442358	6.12803	5.33493	0.972766
hexa	-3.70118	5.85028	4.04669	0.0442581	5.31943	6.1439	0.972766
ctdspl2b	-3.70407	5.85042	4.04621	0.0442706	5.31943	6.14536	0.972766
cdk5rap1	3.68832	5.71842	4.046	0.0442762	6.12722	5.33493	0.972766
cand2	3.68985	6.1339	4.04536	0.0442928	6.12803	5.33493	0.972766
atp13a2	-3.69805	5.84958	4.04468	0.0443107	5.31943	6.14223	0.972766
srsf10b	-3.70417	5.71901	4.04277	0.0443609	5.31943	6.14536	0.972766
dph7	3.68828	5.71829	4.04044	0.0444223	6.12722	5.33493	0.972766
sept8a	-2.54168	5.96937	4.04019	0.0444289	5.64123	6.79351	0.972766
rad1	3.68827	5.78537	4.03919	0.0444553	6.12722	5.33493	0.972766
tpi1b	0.468348	10.5763	4.03815	0.0444827	10.8583	10.4053	0.972766
kalrnb	-3.69538	5.71775	4.03811	0.0444835	5.31943	6.14077	0.972766
acot18	-3.70127	5.91163	4.03739	0.0445025	5.31943	6.1439	0.972766
dock1	3.68824	5.91095	4.03531	0.0445576	6.12722	5.33493	0.972766
zgc:101569	3.68994	5.78575	4.03469	0.0445738	6.12803	5.33493	0.972766
loxl3b	3.68995	5.7857	4.03431	0.0445838	6.12803	5.33493	0.972766
kif1b	3.68995	5.91152	4.03411	0.0445892	6.12803	5.33493	0.972766
rpap3	3.6862	6.1332	4.03385	0.044596	6.12621	5.33493	0.972766
ino80c	2.29273	6.57394	4.03327	0.0446114	7.22599	5.92215	0.972766
fam45a	3.68823	5.78537	4.03304	0.0446175	6.12722	5.33493	0.972766
tfe3b	3.68996	5.71854	4.03219	0.04464	6.12803	5.33493	0.972766
arfip2a	3.69233	5.85044	4.03081	0.0446766	6.12904	5.33493	0.972766
arcn1a	3.6882	5.78529	4.02927	0.0447172	6.12722	5.33493	0.972766
ube2j1	3.6882	5.9112	4.02923	0.0447182	6.12722	5.33493	0.972766
fam102ab	3.68819	5.78542	4.02801	0.0447506	6.12722	5.33493	0.972766
cpsf3	3.69	5.91152	4.02797	0.0447517	6.12803	5.33493	0.972766
tle3a	3.68817	5.84956	4.02541	0.0448196	6.12722	5.33493	0.972766
rnf24	3.68817	5.84956	4.02541	0.0448196	6.12722	5.33493	0.972766
bxdc2	-3.7014	6.08154	4.02432	0.0448488	5.31943	6.1439	0.972766
tfdp2	3.68817	5.84971	4.02429	0.0448496	6.12722	5.33493	0.972766
cxcl18b	-3.70474	5.78653	4.02316	0.0448797	5.31943	6.14536	0.972766
tvp23b	-3.70142	5.71869	4.02179	0.044916	5.31943	6.1439	0.972766
egfra	3.68815	5.91092	4.02156	0.0449221	6.12722	5.33493	0.972766
keap1b	-3.69786	5.84958	4.02119	0.0449321	5.31943	6.14223	0.972766
alg5	-3.69482	5.91055	4.01524	0.0450908	5.31943	6.14077	0.972766
gpatch1	3.69012	5.71875	4.01328	0.0451433	6.12803	5.33493	0.972766
hs6st2	3.69016	5.85035	4.00839	0.0452744	6.12803	5.33493	0.972766
pard6gb	-3.69776	5.97046	4.00798	0.0452855	5.31943	6.14223	0.972766
mtap	3.69019	5.91121	4.00544	0.0453537	6.12803	5.33493	0.972766
thg1l	3.68555	5.71777	4.00332	0.0454107	6.12621	5.33493	0.972766
r3hdm4	3.69021	5.84977	4.00303	0.0454184	6.12803	5.33493	0.972766
yipf2	3.68801	5.71809	4.00176	0.0454528	6.12722	5.33493	0.972766
picalmb	3.6932	5.71903	3.99541	0.0456244	6.12904	5.33493	0.972766
spsb4a	3.68796	5.91105	3.99487	0.0456391	6.12722	5.33493	0.972766
btbd3a	-3.70171	5.71893	3.99207	0.0457147	5.31943	6.1439	0.972766
grnb	-3.69762	5.85002	3.99051	0.0457571	5.31943	6.14223	0.972766
araf	3.68527	5.71789	3.99022	0.0457651	6.12621	5.33493	0.972766
rpusd4	-3.70173	6.02697	3.9899	0.0457738	5.31943	6.1439	0.972766
eif4ebp2	0.806103	8.63167	3.98334	0.0459525	8.74684	8.03923	0.972766
spryd4	-3.70594	5.78658	3.97985	0.0460476	5.31943	6.14536	0.972766
dnase2	3.69051	5.91138	3.96556	0.0464402	6.12803	5.33493	0.972766
pfkma	3.69053	5.78567	3.96317	0.0465062	6.12803	5.33493	0.972766
mef2aa	1.78294	6.71945	3.9612	0.0465606	7.22816	6.14223	0.972766
tspan17	-3.69737	5.71847	3.95716	0.0466725	5.31943	6.14223	0.972766
vps29	-3.69734	5.96991	3.95242	0.046804	5.31943	6.14223	0.972766
grsf1	-1.53884	6.68409	3.94805	0.0469256	6.31956	7.33637	0.972766
btf3	-0.356245	10.6487	3.9419	0.0470975	10.2978	10.6496	0.972766
mtif3	3.6841	5.78514	3.93327	0.0473399	6.12621	5.33493	0.972766
itprip	-3.70226	5.71873	3.93233	0.0473662	5.31943	6.1439	0.972766
sec63	3.68753	6.0264	3.93035	0.047422	6.12722	5.33493	0.972766
vcanb	3.68393	5.71777	3.92523	0.0475666	6.12621	5.33493	0.972766
ppp1r14c	1.62588	6.91167	3.92502	0.0475726	7.40806	6.33734	0.972766
cyp2p7	-3.69711	5.84953	3.92239	0.047647	5.31943	6.14223	0.972766
sfxn4	-3.70237	5.78601	3.92039	0.0477039	5.31943	6.1439	0.972766
vps18	3.68747	5.78593	3.92026	0.0477074	6.12722	5.33493	0.972766
glyctk	-3.70238	6.08251	3.91887	0.047747	5.31943	6.1439	0.972766
psmg2	-3.69247	5.71795	3.91546	0.0478438	5.31943	6.14077	0.972766
ighmbp2	-3.69701	5.71847	3.9077	0.0480652	5.31943	6.14223	0.972766
csnk2a2a	3.68356	6.13321	3.90653	0.0480988	6.12621	5.33493	0.972766
esr2b	-3.70842	5.78621	3.886	0.0486902	5.31943	6.14536	0.972766
slc16a3	1.20889	7.85135	3.88418	0.048743	7.84367	6.92255	0.972766
sfrp1b	-3.69168	5.71775	3.8802	0.0488587	5.31943	6.14077	0.972766
degs1	3.69124	5.71862	3.87212	0.0490944	6.12803	5.33493	0.972766
pank2	-2.33296	6.53654	3.86817	0.0492102	5.64123	6.65949	0.972766
thoc3	3.69127	5.84992	3.86697	0.0492454	6.12803	5.33493	0.972766
rarres3l	3.68713	5.78537	3.8664	0.0492621	6.12722	5.33493	0.972766
ubl3b	-3.69671	5.7181	3.86614	0.0492698	5.31943	6.14223	0.972766
hif1al2	-2.32867	6.28104	3.85375	0.0496349	5.64236	6.6566	0.972766
rpl8	-0.406495	10.7526	3.85135	0.0497061	10.5107	10.9116	0.972766
ppp1r26	-3.69103	5.71795	3.85094	0.049718	5.31943	6.14077	0.972766
coq5	-2.33178	6.02679	3.84787	0.0498092	5.64123	6.65797	0.972766
cast	0.854714	8.25902	3.84736	0.0498243	8.53148	7.79605	0.972766
htatsf1	-2.32858	6.18453	3.84387	0.0499282	5.64236	6.6566	0.972766
atp6ap1b	3.68698	5.91162	3.84319	0.0499485	6.12722	5.33493	0.972766
usp37	-3.69085	5.71795	3.8426	0.0499659	5.31943	6.14077	0.972766
si:ch73-252i11.1	-1.53472	6.7856	3.83943	0.0500605	6.32132	7.33392	0.972766
nsrp1	-2.33329	6.18467	3.83764	0.050114	5.64123	6.65949	0.972766
tnnc1b	-2.02879	7.68354	3.83707	0.0501311	6.90721	8.57489	0.972766
LOC103909937	-2.33183	6.13384	3.83521	0.0501866	5.64123	6.65797	0.972766
sart3	-2.32847	6.08118	3.83201	0.0502826	5.64236	6.6566	0.972766
tfr1b	1.66985	7.43398	3.83068	0.0503225	8.22697	6.91702	0.972766
ndufaf1	-1.54191	7.21097	3.82497	0.0504942	6.32035	7.34024	0.972766
lrrc8c	-2.33343	6.02717	3.82377	0.0505303	5.64123	6.65949	0.972766
agla	-1.05397	7.70145	3.82007	0.0506422	7.40665	8.29045	0.972766
stt3b	-2.33189	6.02685	3.81913	0.0506706	5.64123	6.65797	0.972766
ispd	-2.33111	6.23448	3.81709	0.0507324	5.64236	6.65949	0.972766
arf2a	1.11978	7.75303	3.80685	0.0510433	7.90479	7.03338	0.972766
plcb3	-3.71042	5.71921	3.80409	0.0511276	5.31943	6.14536	0.972766
kdm5bb	2.31161	6.32668	3.79995	0.0512543	6.64254	5.65641	0.972766
cep63	-3.69625	5.78555	3.79855	0.051297	5.31943	6.14223	0.972766
wdr13	2.31164	6.18431	3.79243	0.051485	6.64254	5.65641	0.972766
mrps18b	2.31164	6.23275	3.7917	0.0515073	6.64254	5.65641	0.972766
sufu	2.31058	6.23321	3.77221	0.0521106	6.64164	5.65641	0.972766
pank4	2.31054	6.02683	3.76814	0.0522376	6.64254	5.65793	0.972766
serinc2	-1.66634	6.57438	3.76808	0.0522396	6.12803	7.14241	0.972766
prdm9	-3.68926	5.78508	3.76796	0.0522434	5.31943	6.14077	0.972766
mrps26	2.31278	6.28092	3.76253	0.0524133	6.6433	5.65641	0.972766
lzic	-3.71146	5.71896	3.75967	0.0525028	5.31943	6.14536	0.972766
nbeaa	2.31149	6.32692	3.75847	0.0525408	6.6433	5.65793	0.972766
im:7138535	3.68647	5.71829	3.7574	0.0525743	6.12722	5.33493	0.972766
si:dkey-238c7.16	2.31054	6.22731	3.75004	0.0528062	6.64164	5.65641	0.972766
mov10b.1	-1.44624	6.7187	3.74441	0.0529844	6.49166	7.50397	0.972766
mta2	2.3092	6.08073	3.74342	0.0530158	6.64164	5.65793	0.972766
pcdh15a	-3.69588	5.78568	3.74231	0.0530511	5.31943	6.14223	0.972766
eya3	-3.70389	5.78614	3.73961	0.0531368	5.31943	6.1439	0.972766
dgat2	2.31188	5.91075	3.73638	0.0532397	6.64254	5.65641	0.972766
slc43a1a	2.74067	6.78706	3.73582	0.0532576	6.90879	5.65641	0.972766
tmem256	2.31188	5.97009	3.7355	0.0532678	6.64254	5.65641	0.972766
sf3b6	-2.03382	6.6116	3.73523	0.0532763	5.90595	7.03197	0.972766
zgc:173517	3.57522	5.55496	3.72924	0.0534677	6.07573	5.33493	0.972766
ssr4	-1.53836	6.88015	3.72818	0.0535016	6.31859	7.33392	0.972766
hspb2	2.31155	6.4977	3.72789	0.053511	6.6433	5.65793	0.972766
os9	-1.88269	6.68474	3.72508	0.0536009	5.90595	6.91978	0.972766
fbxo7	-3.69576	6.23326	3.72455	0.053618	5.31943	6.14223	0.972766
zgc:195173	2.31156	6.13432	3.72402	0.053635	6.6433	5.65793	0.972766
rhag	-2.32549	6.32659	3.7201	0.0537611	5.64236	6.65508	0.972766
prox1a	1.64727	6.75303	3.71964	0.0537758	7.12887	6.14223	0.972766
cox7a2l	-1.23429	7.8042	3.71939	0.053784	6.90648	7.86183	0.972766
dhrs7cb	1.11826	7.6303	3.71202	0.0540219	7.90479	7.03609	0.972766
sdhaf4	2.31049	6.02588	3.71149	0.0540392	6.64164	5.65641	0.972766
gigyf2	2.31049	6.18422	3.71115	0.0540502	6.64164	5.65641	0.972766
mgat5	-1.88542	6.41453	3.70766	0.0541633	5.90512	6.92255	0.972766
tulp4a	2.31029	6.0817	3.69901	0.0544449	6.64254	5.65793	0.972766
txndc5	2.31204	6.45527	3.69844	0.0544635	6.64254	5.65641	0.972766
rock2a	-0.883431	8.12247	3.69779	0.0544845	7.8456	8.62269	0.972766
ppp1caa	-1.5395	7.02933	3.69285	0.0546462	6.32132	7.33892	0.972766
dsg2.1	3.69963	5.71882	3.69239	0.0546611	6.12904	5.33493	0.972766
arhgap29b	2.30935	6.37051	3.68842	0.0547914	6.64103	5.65641	0.972766
pls3	1.64598	6.81828	3.68802	0.0548045	7.12747	6.14223	0.972766
ctsc	-1.88446	6.3709	3.67878	0.0551092	5.90512	6.92123	0.972766
prpf40a	2.31045	6.37051	3.67871	0.0551114	6.64164	5.65641	0.972766
ddit3	-1.88614	6.61205	3.67101	0.0553665	5.90406	6.92123	0.972766
samm50	1.35909	7.43473	3.66519	0.0555603	7.96469	6.91846	0.972766
fam133b	-2.22061	6.81948	3.65515	0.055896	5.90406	7.14761	0.972766
mycb	1.86289	6.78712	3.64112	0.0563689	6.90648	5.92215	0.972766
ranbp3b	-1.66576	6.5742	3.63864	0.0564532	6.12803	7.14241	0.972766
khdrbs1a	-0.605722	8.85158	3.63284	0.0566502	8.68006	9.24461	0.972766
ttc19	1.86451	6.57436	3.63188	0.0566827	6.90563	5.91892	0.972766
timm44	-1.88106	6.49656	3.62396	0.0569533	5.90619	6.91966	0.972766
fam207a	1.86295	6.41383	3.62098	0.0570551	6.90502	5.92041	0.972766
ccdc125	2.31039	5.9106	3.61983	0.0570949	6.64164	5.65641	0.972766
khsrp	-1.66718	6.68316	3.61853	0.0571394	6.12621	7.14103	0.972766
slit3	1.86188	6.37135	3.60983	0.057439	6.90563	5.92215	0.972766
iars2	2.31656	6.02714	3.60651	0.0575537	6.6442	5.65641	0.972766
dnajc8	2.30882	6.32565	3.60363	0.0576534	6.64103	5.65641	0.972766
xaf1	-1.88151	6.36993	3.59578	0.0579266	5.90512	6.91846	0.972766
clint1a	-2.32366	6.28003	3.59426	0.0579794	5.64236	6.65508	0.972766
ticrr	3.69325	5.71854	3.57028	0.0588225	6.12803	5.33493	0.972766
rbm5	3.70195	5.91167	3.56227	0.0591068	6.12904	5.33493	0.972766
armc8	1.86479	6.32683	3.55577	0.0593388	6.90648	5.92041	0.972766
zgc:101723	-1.88463	6.08215	3.55162	0.0594873	5.90595	6.92255	0.972766
pabpc4	-0.340906	11.3688	3.54325	0.0597882	10.8862	11.2247	0.972766
vsir	-1.88103	6.23253	3.53681	0.0600207	5.90512	6.91846	0.972766
mybpc3	0.328312	12.0487	3.53658	0.0600292	12.209	11.8886	0.972766
si:dkey-188i13.7	-1.26018	7.41451	3.53635	0.0600374	7.12747	8.14615	0.972766
micu2	1.51213	6.99806	3.52807	0.0603379	7.31881	6.33591	0.972766
rhebl1	1.64971	6.61252	3.51767	0.0607178	7.12968	6.14223	0.972766
rpa1	1.86138	6.32694	3.51349	0.060871	6.90563	5.92215	0.972766
gata4	2.30518	6.02612	3.50948	0.0610188	6.64103	5.65793	0.972766
prdx2	-0.783992	8.58488	3.49187	0.0616709	7.96224	8.65878	0.972766
manf	3.69375	5.84955	3.48421	0.061957	6.12803	5.33493	0.972766
ppp1r10	1.86853	6.37098	3.47225	0.0624062	6.90721	5.91892	0.972766
api5	-1.88494	6.32561	3.45957	0.0628865	5.90406	6.91978	0.972766
sec14l1	-2.34101	6.23433	3.45466	0.0630737	5.64123	6.66087	0.972766
gnb5b	-1.88887	6.08197	3.45091	0.063217	5.90512	6.92387	0.972766
creg1	-0.999235	8.31706	3.45044	0.0632348	7.64231	8.50492	0.972766
dohh	-1.3474	6.71829	3.42307	0.0642914	6.48918	7.42325	0.972766
kmt2a	-1.88743	6.64881	3.41865	0.0644636	5.90406	6.92123	0.972766
eif4a1b	-0.769722	9.4786	3.41598	0.0645681	8.9085	9.63822	0.972766
mrpl57	1.86051	6.32578	3.4087	0.0648535	6.90418	5.92041	0.972766
ddx5	-0.645947	8.72002	3.39758	0.0652922	8.57168	9.16954	0.972766
arg2	1.17616	7.82088	3.39597	0.0653559	8.07933	7.14495	0.972766
rps4x	-0.323036	10.7353	3.38722	0.0657035	10.6168	10.9369	0.972766
snrnp70	-2.06129	6.75416	3.37814	0.0660666	5.90512	7.04009	0.972766
ddx39aa	2.03062	6.49613	3.37775	0.0660823	7.0216	5.92041	0.972766
vcam1b	-1.62456	7.34879	3.37618	0.0661453	6.48995	7.65144	0.972766
fhl2a	-1.17443	7.0556	3.37438	0.0662176	6.78132	7.65845	0.972766
p4hb	1.32444	6.78641	3.3731	0.0662691	7.40881	6.50661	0.972766
cxcl12b	1.32451	7.13384	3.3562	0.0669525	7.40806	6.5052	0.972766
ndufa8	0.923161	8.10873	3.33783	0.067704	8.36321	7.58626	0.972766
ctrb1	-2.54995	7.39549	3.33779	0.0677054	5.64236	6.79768	0.972766
tefb	-1.65995	6.57398	3.33364	0.0678764	6.12803	7.13976	0.972766
col1a1a	0.909039	8.82625	3.30983	0.0688668	9.4528	8.61917	0.972766
crot	1.86226	6.53683	3.27894	0.070174	6.90648	5.92215	0.972766
cox6c	0.571281	9.02701	3.26452	0.0707937	9.38765	8.85967	0.972766
hnrnpm	-1.29403	7.10782	3.26196	0.0709044	6.64254	7.58145	0.972766
2023-09-15	-1.4133	7.08213	3.25803	0.0710746	6.32132	7.24137	0.972766
eloa	-0.895934	7.91271	3.22734	0.0724183	7.48882	8.24564	0.972766
gpia	0.711079	8.55593	3.21803	0.072831	8.87657	8.24161	0.972766
zgc:91860	0.972911	7.68461	3.21396	0.0730127	8.02219	7.24387	0.972766
sypl2a	1.20906	7.4547	3.20849	0.0732573	7.8418	6.91846	0.972766
sdha	0.614444	9.15555	3.19164	0.0740159	9.43044	8.86293	0.972766
atp5mea	1.13217	7.20804	3.18295	0.0744101	7.77922	6.92123	0.972766
atp5mc3a	0.5703	8.76107	3.15765	0.0755717	9.25229	8.73005	0.972766
stab1	-1.41348	6.85109	3.14966	0.075943	6.32132	7.24262	0.972766
synm	-0.684728	8.92804	3.14111	0.0763417	8.60744	9.2439	0.972766
zgc:85777	-0.890594	7.86746	3.13023	0.076853	7.49298	8.24362	0.972766
bag3	-1.20148	7.13428	3.12739	0.0769867	6.64164	7.50761	0.972766
dnaja2l	1.39483	6.61148	3.12085	0.0772963	7.22816	6.33429	0.972766
calm3b	1.86918	6.97146	3.11142	0.0777452	6.90721	5.92041	0.972766
mao	1.39208	6.75234	3.10988	0.0778185	7.22668	6.33591	0.972766
jph2	0.917701	7.83557	3.09803	0.0783869	8.18002	7.42705	0.972766
letm1	1.39187	6.85087	3.08202	0.0791623	7.22747	6.33734	0.972766
mdh2	0.246872	12.1592	3.05406	0.0805354	12.1336	11.8938	0.972766
krt94	-0.256012	11.5989	3.04938	0.0807679	11.4203	11.6774	0.972766
si:ch211-191d15.2	-1.20308	7.32781	3.02777	0.0818503	6.64164	7.50887	0.972766
tmem30aa	-1.52034	6.5362	3.02497	0.0819917	6.12722	7.03738	0.972766
h1f0	1.61393	6.64742	3.01661	0.0824157	7.40598	6.33734	0.972766
ndufab1a	1.10244	7.63187	3.01391	0.0825531	8.23149	7.33392	0.972766
mpzl1l	-1.89255	6.49694	3.00837	0.0828357	5.90512	6.92387	0.972766
si:dkey-6n6.2	-1.51778	7.05459	3.00694	0.0829089	6.12803	7.03468	0.972766
sparc	0.644015	8.73401	3.00264	0.0831287	9.04696	8.46375	0.972766
per2	1.51543	7.05372	2.95581	0.0855693	7.31948	6.33429	0.972766
micu1	1.497	6.53602	2.93053	0.0869192	7.02088	6.1439	0.972766
synj2bp	2.04948	6.65023	2.92038	0.0874672	7.02468	5.92041	0.972766
eif4a3	1.49754	6.6837	2.90348	0.0883885	7.02017	6.14223	0.972766
ache	-1.52424	6.72046	2.88829	0.0892257	6.12722	7.04009	0.972766
itm2bb	-0.930105	7.49656	2.86989	0.0902512	7.22668	7.98103	0.972766
si:dkey-7j14.6	0.906714	7.70321	2.86463	0.0905465	7.96591	7.24387	0.972766
azin1b	-1.23232	7.10794	2.86348	0.0906111	6.49089	7.33515	0.972766
adar	-1.6985	6.57497	2.86113	0.0907437	5.90512	6.79633	0.972766
mrps7	-1.51817	6.49633	2.85519	0.0910798	6.12803	7.03609	0.972766
irx5a	1.49571	6.2802	2.8517	0.0912776	7.02017	6.1439	0.972766
id3	-2.08084	6.23352	2.84642	0.0915777	5.64123	6.50661	0.972766
rbbp9	-2.08084	6.13396	2.84581	0.0916126	5.64123	6.50661	0.972766
sec62	-2.08085	6.13397	2.84576	0.0916152	5.64123	6.50661	0.972766
ash2l	-2.07972	6.02652	2.8447	0.091676	5.64123	6.5052	0.972766
scn5lab	-1.70015	6.32644	2.84158	0.0918541	5.90406	6.79633	0.972766
fastk	-2.07871	6.08169	2.84091	0.0918922	5.64236	6.50661	0.972766
snrpa	-2.07871	6.02729	2.84074	0.0919021	5.64236	6.50661	0.972766
wbp1lb	-2.07871	6.08193	2.84056	0.0919121	5.64236	6.50661	0.972766
hic1	-2.07871	6.28084	2.8404	0.0919215	5.64236	6.50661	0.972766
fcho2	-2.0776	6.28105	2.83984	0.0919534	5.64236	6.5052	0.972766
kctd12.2	1.50055	6.53605	2.83858	0.0920253	7.02231	6.14223	0.972766
anapc16	-2.07972	6.02628	2.83669	0.0921336	5.64123	6.5052	0.972766
nop58	-1.6986	6.3271	2.83647	0.0921464	5.90512	6.79633	0.972766
ndfip2	-2.07828	6.37064	2.83563	0.0921946	5.64123	6.50364	0.972766
psmb8a	-2.08099	6.08106	2.83301	0.092345	5.64123	6.50661	0.972766
u2surp	-1.07605	7.23525	2.83263	0.0923668	6.90721	7.73174	0.972766
mxe	-2.07872	6.02705	2.83238	0.0923813	5.64236	6.50661	0.972766
hbs1l	-2.07613	6.64846	2.83164	0.0924242	5.64236	6.50364	0.972766
mrpl36	-2.07752	6.02702	2.83143	0.0924358	5.64236	6.5052	0.972766
nono	-1.69864	6.45644	2.8272	0.0926797	5.90512	6.79633	0.972766
msh2	-2.07972	5.91088	2.82662	0.0927133	5.64123	6.5052	0.972766
sec24c	-2.07972	5.911	2.82651	0.0927196	5.64123	6.5052	0.972766
pdhb	0.708281	9.26586	2.82318	0.0929121	9.67897	9.01515	0.972766
tmem106a	-2.07873	5.91173	2.82179	0.0929926	5.64236	6.50661	0.972766
snu13a	-2.07873	5.91178	2.82169	0.0929983	5.64236	6.50661	0.972766
ccdc85ca	-2.07972	5.84947	2.82091	0.0930434	5.64123	6.5052	0.972766
phkg1b	-1.69988	6.32742	2.81783	0.0932222	5.90512	6.79768	0.972766
eif4a2	-1.08577	7.30502	2.81697	0.0932721	6.77896	7.58626	0.972766
mrto4	-2.07737	6.02738	2.81568	0.0933475	5.64236	6.5052	0.972766
dcaf12	-2.07973	5.84934	2.81488	0.093394	5.64123	6.5052	0.972766
fzd2	-1.69869	6.5367	2.81455	0.0934133	5.90512	6.79633	0.972766
slc37a2	-1.69869	6.13397	2.81261	0.0935263	5.90512	6.79633	0.972766
dlg1l	-2.07874	5.97062	2.80935	0.0937161	5.64236	6.50661	0.972766
rtn3	-2.08316	6.08187	2.80899	0.0937375	5.64123	6.50817	0.972766
rbx1	2.05967	6.53657	2.80846	0.0937681	6.49089	5.65793	0.972766
npepl1	-1.70183	6.57542	2.80822	0.0937823	5.90406	6.79768	0.972766
btbd10a	2.06063	6.37127	2.80265	0.0941086	6.49089	5.65641	0.972766
khdc4	-2.07973	6.13387	2.80164	0.0941679	5.64123	6.5052	0.972766
spty2d1	-2.07549	6.23277	2.79767	0.0944015	5.64236	6.50364	0.972766
pcdh1g18	-3.18748	5.57594	2.79414	0.0946097	5.31943	5.92657	0.972766
ctgfa	1.49723	6.53544	2.79322	0.0946638	7.02017	6.14223	0.972766
prkcda	-2.08354	5.97057	2.79168	0.0947549	5.64123	6.50817	0.972766
pip5k1bb	-2.08355	6.02722	2.79135	0.0947743	5.64123	6.50817	0.972766
lactb	-2.07974	6.02646	2.78682	0.0950427	5.64123	6.5052	0.972766
si:ch1073-325m22.2	0.669339	8.23485	2.7863	0.0950732	8.68006	8.09211	0.972766
rnf14	-1.69482	6.32644	2.78581	0.0951028	5.90595	6.79351	0.972766
trim8b	-2.07709	6.18476	2.78511	0.0951442	5.64236	6.5052	0.972766
smndc1	-2.07779	6.32646	2.78506	0.0951471	5.64123	6.50364	0.972766
sarnp	2.06083	6.134	2.78497	0.0951524	6.49089	5.65641	0.972766
ptp4a2a	2.06083	6.13387	2.78476	0.0951648	6.49089	5.65641	0.972766
csk	2.05964	6.13415	2.78167	0.0953489	6.49089	5.65793	0.972766
cebpa	2.0609	6.18433	2.77844	0.0955412	6.49089	5.65641	0.972766
cpt2	1.51283	6.68331	2.77695	0.0956298	7.31881	6.33429	0.972766
stxbp2	2.06092	6.02657	2.77682	0.0956379	6.49089	5.65641	0.972766
ap2m1b	2.05963	6.1836	2.77663	0.095649	6.48995	5.65641	0.972766
grinab	-2.08389	6.13471	2.77591	0.0956921	5.64123	6.50817	0.972766
nup205	-2.07975	5.91095	2.77562	0.0957095	5.64123	6.5052	0.972766
slc3a2b	2.05964	6.18483	2.77443	0.0957808	6.49089	5.65793	0.972766
fam174b	-1.23385	7.02714	2.77339	0.0958428	6.48995	7.33637	0.972766
abi3bpb	2.05963	6.02708	2.77302	0.0958652	6.49089	5.65793	0.972766
smad3b	2.05837	5.96992	2.77159	0.0959511	6.48995	5.65793	0.972766
aldh9a1b	2.06103	5.91107	2.76721	0.0962139	6.49089	5.65641	0.972766
snx16	2.06072	6.23412	2.76696	0.0962288	6.49166	5.65793	0.972766
cnih1	2.05962	6.08173	2.7648	0.0963588	6.49089	5.65793	0.972766
pecr	-2.08105	5.91206	2.76335	0.0964459	5.64236	6.50817	0.972766
arpp19b	2.05962	5.91165	2.76331	0.0964484	6.49089	5.65793	0.972766
zbtb20	2.05828	6.08117	2.76252	0.0964961	6.48995	5.65793	0.972766
ptpn13	-3.16881	5.85007	2.7617	0.0965453	5.31943	5.92041	0.972766
lamtor5	-3.16881	5.84982	2.76154	0.0965555	5.31943	5.92041	0.972766
rbm22	-3.16881	5.84995	2.76048	0.0966195	5.31943	5.92041	0.972766
abi2b	-3.16882	5.78573	2.75896	0.0967111	5.31943	5.92041	0.972766
ndst1b	-3.16882	5.7858	2.75889	0.0967151	5.31943	5.92041	0.972766
hsd3b7	-3.17105	5.97061	2.75862	0.0967314	5.31943	5.92215	0.972766
spag9a	-3.16882	5.85045	2.75858	0.0967338	5.31943	5.92041	0.972766
rbms3	-3.17107	5.85015	2.75829	0.0967518	5.31943	5.92215	0.972766
washc5	-3.17109	6.02732	2.75779	0.096782	5.31943	5.92215	0.972766
acbd6	-3.16882	5.71859	2.75714	0.0968211	5.31943	5.92041	0.972766
unc119b	-3.16739	6.0815	2.75709	0.0968245	5.31943	5.91892	0.972766
zc3h18	-3.17113	6.0822	2.75703	0.0968277	5.31943	5.92215	0.972766
zgc:56596	-3.17114	5.57461	2.75677	0.0968433	5.31943	5.92215	0.972766
tpcn2	-3.17114	5.57461	2.75677	0.0968433	5.31943	5.92215	0.972766
coro1b	-3.17114	5.57461	2.75677	0.0968433	5.31943	5.92215	0.972766
mepce	-3.17114	5.64858	2.75677	0.0968433	5.31943	5.92215	0.972766
cyb5r4	-3.17114	5.57448	2.75677	0.0968433	5.31943	5.92215	0.972766
ippk	-3.17114	5.57461	2.75677	0.0968433	5.31943	5.92215	0.972766
memo1	-3.17114	5.57448	2.75677	0.0968433	5.31943	5.92215	0.972766
fxn	-3.17114	5.57448	2.75677	0.0968433	5.31943	5.92215	0.972766
elavl1b	-3.17114	5.57448	2.75677	0.0968433	5.31943	5.92215	0.972766
tmem8a	-3.17114	5.57448	2.75677	0.0968433	5.31943	5.92215	0.972766
agtr2	-3.17114	5.64858	2.75677	0.0968433	5.31943	5.92215	0.972766
pkmyt1	-3.17114	5.57448	2.75677	0.0968433	5.31943	5.92215	0.972766
trappc5	-3.17114	5.57448	2.75677	0.0968433	5.31943	5.92215	0.972766
lztfl1	-3.17114	5.6485	2.75677	0.0968433	5.31943	5.92215	0.972766
aebp2	-3.17114	5.64862	2.75677	0.0968433	5.31943	5.92215	0.972766
ints14	-3.17114	5.64862	2.75677	0.0968433	5.31943	5.92215	0.972766
lpp	-3.17114	5.6485	2.75677	0.0968433	5.31943	5.92215	0.972766
b4galt6	-3.17114	5.64862	2.75677	0.0968433	5.31943	5.92215	0.972766
crcp	-3.17114	5.6485	2.75677	0.0968433	5.31943	5.92215	0.972766
dync1li2	-3.17114	5.57435	2.75677	0.0968433	5.31943	5.92215	0.972766
trmt10b	-3.17114	5.49637	2.75677	0.0968433	5.31943	5.92215	0.972766
imp4	-3.17114	5.49637	2.75677	0.0968433	5.31943	5.92215	0.972766
tmem209	-3.17114	5.5744	2.75677	0.0968433	5.31943	5.92215	0.972766
ptgs2a	-3.17114	5.49637	2.75677	0.0968433	5.31943	5.92215	0.972766
rabl3	-3.17114	5.5744	2.75677	0.0968433	5.31943	5.92215	0.972766
fbxo45	-3.17114	5.49637	2.75677	0.0968433	5.31943	5.92215	0.972766
apoob	-3.17114	5.5744	2.75677	0.0968433	5.31943	5.92215	0.972766
rex1bd	-3.17114	5.49637	2.75677	0.0968433	5.31943	5.92215	0.972766
zgc:153704	-3.17114	5.49637	2.75677	0.0968433	5.31943	5.92215	0.972766
yif1a	-3.17114	5.49637	2.75677	0.0968433	5.31943	5.92215	0.972766
gorab	-3.17114	5.49637	2.75677	0.0968433	5.31943	5.92215	0.972766
numb	-3.17114	5.5744	2.75677	0.0968433	5.31943	5.92215	0.972766
inip	-3.17114	5.6487	2.75677	0.0968433	5.31943	5.92215	0.972766
si:ch211-281g13.4	-3.17114	5.64833	2.75677	0.0968433	5.31943	5.92215	0.972766
wdr55	-3.17114	5.57435	2.75677	0.0968433	5.31943	5.92215	0.972766
wrap53	-3.17114	5.57435	2.75677	0.0968433	5.31943	5.92215	0.972766
fbxl2	-3.17114	5.49637	2.75677	0.0968433	5.31943	5.92215	0.972766
ccdc6b	-3.17114	5.57435	2.75677	0.0968433	5.31943	5.92215	0.972766
zgc:174904	-3.17114	5.64837	2.75677	0.0968433	5.31943	5.92215	0.972766
gmeb1	-3.17114	5.57435	2.75677	0.0968433	5.31943	5.92215	0.972766
cptp	-3.17114	5.5744	2.75677	0.0968433	5.31943	5.92215	0.972766
zcchc17	-3.17114	5.49637	2.75677	0.0968433	5.31943	5.92215	0.972766
utp23	-3.17114	5.6487	2.75677	0.0968433	5.31943	5.92215	0.972766
lig4	-3.17114	5.49637	2.75677	0.0968433	5.31943	5.92215	0.972766
zgc:66472	-3.17114	5.6487	2.75677	0.0968433	5.31943	5.92215	0.972766
nup43	-3.17114	5.6487	2.75677	0.0968433	5.31943	5.92215	0.972766
mfsd4b	-3.17114	5.49637	2.75677	0.0968433	5.31943	5.92215	0.972766
ttc32	-3.17114	5.49637	2.75677	0.0968433	5.31943	5.92215	0.972766
pik3r3b	-3.17117	5.85015	2.75623	0.0968766	5.31943	5.92215	0.972766
mbnl2	2.05822	5.97036	2.75622	0.0968772	6.48995	5.65793	0.972766
msl1a	2.0608	6.13459	2.75618	0.0968795	6.49166	5.65793	0.972766
ppp2r3c	2.06115	5.96986	2.75615	0.0968813	6.49089	5.65641	0.972766
brf1b	2.06115	5.96998	2.75602	0.0968893	6.49089	5.65641	0.972766
chordc1a	-3.16882	5.71852	2.75547	0.0969221	5.31943	5.92041	0.972766
rps14	-0.315692	10.691	2.75477	0.096965	10.5379	10.8506	0.972766
cavin4b	-3.16729	6.0268	2.75431	0.0969926	5.31943	5.91892	0.972766
cpsf2	-3.17126	5.71898	2.75413	0.0970035	5.31943	5.92215	0.972766
tmtc4	-3.16882	5.71852	2.75363	0.0970338	5.31943	5.92041	0.972766
tmem230a	-3.16726	5.91067	2.75356	0.0970384	5.31943	5.91892	0.972766
sh3rf1	-3.16882	5.71827	2.7535	0.097042	5.31943	5.92041	0.972766
ssu72	-3.16882	5.78585	2.75349	0.0970423	5.31943	5.92041	0.972766
hdac8	-3.16882	5.8497	2.75348	0.097043	5.31943	5.92041	0.972766
ppp2r5cb	-3.16882	5.84987	2.75329	0.0970543	5.31943	5.92041	0.972766
ergic3	-3.16882	5.57392	2.75311	0.0970653	5.31943	5.92041	0.972766
ccdc58	-3.16882	5.64802	2.75311	0.0970653	5.31943	5.92041	0.972766
rfxank	-3.16882	5.64802	2.75311	0.0970653	5.31943	5.92041	0.972766
il15	-3.16882	5.57392	2.75311	0.0970653	5.31943	5.92041	0.972766
acot8	-3.16882	5.57392	2.75311	0.0970653	5.31943	5.92041	0.972766
cxcl20	-3.16882	5.57392	2.75311	0.0970653	5.31943	5.92041	0.972766
emc9	-3.16882	5.64786	2.75311	0.0970653	5.31943	5.92041	0.972766
ext1a	-3.16882	5.57392	2.75311	0.0970653	5.31943	5.92041	0.972766
yif1b	-3.16882	5.57392	2.75311	0.0970653	5.31943	5.92041	0.972766
tbrg1	-3.16882	5.57392	2.75311	0.0970653	5.31943	5.92041	0.972766
fam173b	-3.16882	5.57392	2.75311	0.0970653	5.31943	5.92041	0.972766
fam117bb	-3.16882	5.64815	2.75311	0.0970653	5.31943	5.92041	0.972766
metap1d	-3.16882	5.57413	2.75311	0.0970653	5.31943	5.92041	0.972766
zgc:153738	-3.16882	5.57413	2.75311	0.0970653	5.31943	5.92041	0.972766
mpp6a	-3.16882	5.57413	2.75311	0.0970653	5.31943	5.92041	0.972766
zgc:162193	-3.16882	5.64811	2.75311	0.0970653	5.31943	5.92041	0.972766
oxnad1	-3.16882	5.64815	2.75311	0.0970653	5.31943	5.92041	0.972766
pcid2	-3.16882	5.64811	2.75311	0.0970653	5.31943	5.92041	0.972766
LOC567622	-3.16882	5.57413	2.75311	0.0970653	5.31943	5.92041	0.972766
pck2	-3.16882	5.57413	2.75311	0.0970653	5.31943	5.92041	0.972766
edem1	-3.16882	5.57413	2.75311	0.0970653	5.31943	5.92041	0.972766
nucb2b	-3.16882	5.64811	2.75311	0.0970653	5.31943	5.92041	0.972766
vps72a	-3.16882	5.57413	2.75311	0.0970653	5.31943	5.92041	0.972766
arv1	-3.16882	5.64811	2.75311	0.0970653	5.31943	5.92041	0.972766
adprh	-3.16882	5.64815	2.75311	0.0970653	5.31943	5.92041	0.972766
smarca5	-3.16882	5.64811	2.75311	0.0970653	5.31943	5.92041	0.972766
pycr3	-3.16882	5.57413	2.75311	0.0970653	5.31943	5.92041	0.972766
gpm6bb	-3.16882	5.49589	2.75311	0.0970653	5.31943	5.92041	0.972766
tmem9	-3.16882	5.64803	2.75311	0.0970653	5.31943	5.92041	0.972766
smad3a	-3.16882	5.6479	2.75311	0.0970653	5.31943	5.92041	0.972766
zgc:172143	-3.16882	5.574	2.75311	0.0970653	5.31943	5.92041	0.972766
dzip1	-3.16882	5.64823	2.75311	0.0970653	5.31943	5.92041	0.972766
si:ch211-157p22.10	-3.16882	5.49589	2.75311	0.0970653	5.31943	5.92041	0.972766
rps6ka4	-3.16882	5.6479	2.75311	0.0970653	5.31943	5.92041	0.972766
ctu1	-3.16882	5.49589	2.75311	0.0970653	5.31943	5.92041	0.972766
zgc:136439	-3.16882	5.574	2.75311	0.0970653	5.31943	5.92041	0.972766
tex2	-3.16882	5.64798	2.75311	0.0970653	5.31943	5.92041	0.972766
pde5ab	-3.16882	5.49589	2.75311	0.0970653	5.31943	5.92041	0.972766
asf1ba	-3.16882	5.49589	2.75311	0.0970653	5.31943	5.92041	0.972766
tmem98	-3.16882	5.49589	2.75311	0.0970653	5.31943	5.92041	0.972766
them6	-3.16882	5.49589	2.75311	0.0970653	5.31943	5.92041	0.972766
tspan37	-3.16882	5.57388	2.75311	0.0970653	5.31943	5.92041	0.972766
pls1	-3.16882	5.49589	2.75311	0.0970653	5.31943	5.92041	0.972766
uck2b	-3.16882	5.49589	2.75311	0.0970653	5.31943	5.92041	0.972766
grip1	-3.16882	5.574	2.75311	0.0970653	5.31943	5.92041	0.972766
tgfbr1b	-3.16882	5.49589	2.75311	0.0970653	5.31943	5.92041	0.972766
zgc:173570	-3.16882	5.574	2.75311	0.0970653	5.31943	5.92041	0.972766
pars2	-3.16882	5.574	2.75311	0.0970653	5.31943	5.92041	0.972766
pmepa1	-3.16882	5.49589	2.75311	0.0970653	5.31943	5.92041	0.972766
ptrh2	-3.16882	5.57388	2.75311	0.0970653	5.31943	5.92041	0.972766
mybpc1	-3.16882	5.49589	2.75311	0.0970653	5.31943	5.92041	0.972766
nup155	-3.16882	5.64798	2.75311	0.0970653	5.31943	5.92041	0.972766
b4galt1l	-3.16882	5.6479	2.75311	0.0970653	5.31943	5.92041	0.972766
fam83hb	-3.16882	5.574	2.75311	0.0970653	5.31943	5.92041	0.972766
zgc:194285	-3.16882	5.49589	2.75311	0.0970653	5.31943	5.92041	0.972766
lix1l	-3.16882	5.49589	2.75311	0.0970653	5.31943	5.92041	0.972766
cpvl	-3.16882	5.49589	2.75311	0.0970653	5.31943	5.92041	0.972766
ttc4	-3.16882	5.49589	2.75311	0.0970653	5.31943	5.92041	0.972766
chid1	-3.16882	5.49589	2.75311	0.0970653	5.31943	5.92041	0.972766
stox1	-3.16882	5.64798	2.75311	0.0970653	5.31943	5.92041	0.972766
ifit8	-3.16882	5.57388	2.75311	0.0970653	5.31943	5.92041	0.972766
prkg1a	-3.16882	5.49589	2.75311	0.0970653	5.31943	5.92041	0.972766
prrc1	-3.16882	5.49589	2.75311	0.0970653	5.31943	5.92041	0.972766
rap1gap2a	-3.16882	5.49589	2.75311	0.0970653	5.31943	5.92041	0.972766
cdh1	-3.16882	5.57388	2.75311	0.0970653	5.31943	5.92041	0.972766
hdac10	-3.16882	5.49589	2.75311	0.0970653	5.31943	5.92041	0.972766
ap4m1	-3.16882	5.49589	2.75311	0.0970653	5.31943	5.92041	0.972766
smyd5	-3.16882	5.49589	2.75311	0.0970653	5.31943	5.92041	0.972766
ift46	-3.16882	5.6479	2.75311	0.0970653	5.31943	5.92041	0.972766
gabpb1	-3.16882	5.57388	2.75311	0.0970653	5.31943	5.92041	0.972766
mtss1	-3.16882	5.574	2.75311	0.0970653	5.31943	5.92041	0.972766
smpd1	-3.16882	5.49589	2.75311	0.0970653	5.31943	5.92041	0.972766
b4galt7	-3.16882	5.49589	2.75311	0.0970653	5.31943	5.92041	0.972766
bloc1s3	-3.16882	5.49589	2.75311	0.0970653	5.31943	5.92041	0.972766
il17rd	-3.16882	5.49589	2.75311	0.0970653	5.31943	5.92041	0.972766
ptprna	-3.16882	5.49589	2.75311	0.0970653	5.31943	5.92041	0.972766
ptpreb	-3.16882	5.49589	2.75311	0.0970653	5.31943	5.92041	0.972766
rufy2	-3.16882	5.49589	2.75311	0.0970653	5.31943	5.92041	0.972766
mbip	-3.16882	5.574	2.75311	0.0970653	5.31943	5.92041	0.972766
si:dkey-25e12.3	-3.16882	5.64803	2.75311	0.0970653	5.31943	5.92041	0.972766
arpin	-3.16882	5.64803	2.75311	0.0970653	5.31943	5.92041	0.972766
il2rb	-3.16882	5.64823	2.75311	0.0970653	5.31943	5.92041	0.972766
ugt5c2	-3.16882	5.49589	2.75311	0.0970653	5.31943	5.92041	0.972766
pip5k1aa	-3.16882	5.574	2.75311	0.0970653	5.31943	5.92041	0.972766
e2f3	-3.16882	5.49589	2.75311	0.0970653	5.31943	5.92041	0.972766
setdb2	-3.16882	5.49589	2.75311	0.0970653	5.31943	5.92041	0.972766
cx32.2	-3.16882	5.49589	2.75311	0.0970653	5.31943	5.92041	0.972766
ipo8	-3.16882	5.6479	2.75311	0.0970653	5.31943	5.92041	0.972766
stard4	-3.16882	5.64798	2.75311	0.0970653	5.31943	5.92041	0.972766
si:ch211-175m2.5	-3.16882	5.6479	2.75311	0.0970653	5.31943	5.92041	0.972766
heatr6	-3.16882	5.574	2.75311	0.0970653	5.31943	5.92041	0.972766
sult6b1	-3.16882	5.64803	2.75311	0.0970653	5.31943	5.92041	0.972766
tubg1	-3.16882	5.91143	2.75236	0.097111	5.31943	5.92041	0.972766
entr1	-3.17137	5.71886	2.75178	0.0971465	5.31943	5.92215	0.972766
hnrnph3	-3.17137	5.71886	2.75178	0.0971465	5.31943	5.92215	0.972766
ebag9	2.05961	5.97025	2.75165	0.0971539	6.49089	5.65793	0.972766
gabpb2a	-3.16883	5.71827	2.75121	0.0971809	5.31943	5.92041	0.972766
tll1	-3.16883	5.71847	2.75104	0.0971912	5.31943	5.92041	0.972766
pogzb	-3.16883	5.71847	2.75092	0.0971986	5.31943	5.92041	0.972766
tmem242	-3.16883	5.71851	2.75083	0.0972038	5.31943	5.92041	0.972766
tapbp.1	-1.69562	6.13345	2.75083	0.0972039	5.90512	6.79351	0.972766
atxn2	-3.16715	5.5736	2.75081	0.0972049	5.31943	5.91892	0.972766
zmat5	-3.16715	5.64758	2.75081	0.0972049	5.31943	5.91892	0.972766
tchp	-3.16715	5.64771	2.75081	0.0972049	5.31943	5.91892	0.972766
znf1124	-3.16715	5.64763	2.75081	0.0972049	5.31943	5.91892	0.972766
cdr2l	-3.16715	5.57373	2.75081	0.0972049	5.31943	5.91892	0.972766
rdh8a	-3.16715	5.5736	2.75081	0.0972049	5.31943	5.91892	0.972766
slc35b3	-3.16715	5.57373	2.75081	0.0972049	5.31943	5.91892	0.972766
igsf8	-3.16715	5.57373	2.75081	0.0972049	5.31943	5.91892	0.972766
nudt19	-3.16715	5.57373	2.75081	0.0972049	5.31943	5.91892	0.972766
zgc:91890	-3.16715	5.5736	2.75081	0.0972049	5.31943	5.91892	0.972766
lrrc20	-3.16715	5.57373	2.75081	0.0972049	5.31943	5.91892	0.972766
spata5l1	-3.16715	5.5736	2.75081	0.0972049	5.31943	5.91892	0.972766
rpp38	-3.16715	5.57373	2.75081	0.0972049	5.31943	5.91892	0.972766
ppm1aa	-3.16715	5.64763	2.75081	0.0972049	5.31943	5.91892	0.972766
si:ch73-314g15.3	-3.16715	5.64771	2.75081	0.0972049	5.31943	5.91892	0.972766
ccnjl	-3.16715	5.5736	2.75081	0.0972049	5.31943	5.91892	0.972766
commd3	-3.16715	5.64775	2.75081	0.0972049	5.31943	5.91892	0.972766
crb2a	-3.16715	5.64771	2.75081	0.0972049	5.31943	5.91892	0.972766
utp15	-3.16715	5.64775	2.75081	0.0972049	5.31943	5.91892	0.972766
mfsd5	-3.16715	5.64771	2.75081	0.0972049	5.31943	5.91892	0.972766
abhd11	-3.16715	5.64762	2.75081	0.0972049	5.31943	5.91892	0.972766
zgc:136564	-3.16715	5.49549	2.75081	0.0972049	5.31943	5.91892	0.972766
rnf34a	-3.16715	5.64783	2.75081	0.0972049	5.31943	5.91892	0.972766
si:busm1-194e12.11	-3.16715	5.49549	2.75081	0.0972049	5.31943	5.91892	0.972766
tada2b	-3.16715	5.64746	2.75081	0.0972049	5.31943	5.91892	0.972766
si:dkey-281i8.1	-3.16715	5.49549	2.75081	0.0972049	5.31943	5.91892	0.972766
nfatc2ip	-3.16715	5.49549	2.75081	0.0972049	5.31943	5.91892	0.972766
mbd1a	-3.16715	5.64783	2.75081	0.0972049	5.31943	5.91892	0.972766
ptgdsb.1	-3.16715	5.49549	2.75081	0.0972049	5.31943	5.91892	0.972766
plp2	-3.16715	5.49549	2.75081	0.0972049	5.31943	5.91892	0.972766
nell2a	-3.16715	5.57348	2.75081	0.0972049	5.31943	5.91892	0.972766
anapc5	-3.16715	5.49549	2.75081	0.0972049	5.31943	5.91892	0.972766
kbtbd8	-3.16715	5.57348	2.75081	0.0972049	5.31943	5.91892	0.972766
psmd10	-3.16715	5.57352	2.75081	0.0972049	5.31943	5.91892	0.972766
ugcg	-3.16715	5.49549	2.75081	0.0972049	5.31943	5.91892	0.972766
brf1a	-3.16715	5.57348	2.75081	0.0972049	5.31943	5.91892	0.972766
slc12a2	-3.16715	5.49549	2.75081	0.0972049	5.31943	5.91892	0.972766
pwp2h	-3.16715	5.57348	2.75081	0.0972049	5.31943	5.91892	0.972766
rbm18	-3.16715	5.49549	2.75081	0.0972049	5.31943	5.91892	0.972766
zgc:158423	-3.16715	5.49549	2.75081	0.0972049	5.31943	5.91892	0.972766
nop2	-3.16715	5.6475	2.75081	0.0972049	5.31943	5.91892	0.972766
ches1	-3.16715	5.49549	2.75081	0.0972049	5.31943	5.91892	0.972766
rb1	-3.16715	5.49549	2.75081	0.0972049	5.31943	5.91892	0.972766
tfeb	-3.16715	5.6475	2.75081	0.0972049	5.31943	5.91892	0.972766
lhfpl2a	-3.16715	5.49549	2.75081	0.0972049	5.31943	5.91892	0.972766
eif4ea	-3.16715	5.49549	2.75081	0.0972049	5.31943	5.91892	0.972766
apip	-3.16715	5.6475	2.75081	0.0972049	5.31943	5.91892	0.972766
praf2	-3.16715	5.6475	2.75081	0.0972049	5.31943	5.91892	0.972766
slc12a3	-3.16715	5.49549	2.75081	0.0972049	5.31943	5.91892	0.972766
necab2	-3.16715	5.49549	2.75081	0.0972049	5.31943	5.91892	0.972766
zgc:162958	-3.16715	5.57352	2.75081	0.0972049	5.31943	5.91892	0.972766
ugt1b2	-3.16715	5.49549	2.75081	0.0972049	5.31943	5.91892	0.972766
tapt1b	-3.16715	5.64783	2.75081	0.0972049	5.31943	5.91892	0.972766
elmod2	-3.16715	5.49549	2.75081	0.0972049	5.31943	5.91892	0.972766
nup133	-3.16715	5.57348	2.75081	0.0972049	5.31943	5.91892	0.972766
mri1	-3.16715	5.49549	2.75081	0.0972049	5.31943	5.91892	0.972766
ttbk2b	-3.16715	5.57352	2.75081	0.0972049	5.31943	5.91892	0.972766
cfbl	-3.16715	5.49549	2.75081	0.0972049	5.31943	5.91892	0.972766
ypel3	-3.16711	5.91104	2.74987	0.0972624	5.31943	5.91892	0.972766
nifk	-3.16708	5.78545	2.7491	0.0973095	5.31943	5.91892	0.972766
smc5	-3.16883	5.85033	2.74895	0.0973186	5.31943	5.92041	0.972766
wdr82	-3.16707	5.718	2.74888	0.0973224	5.31943	5.91892	0.972766
ptpa	-3.16883	5.91156	2.74824	0.0973618	5.31943	5.92041	0.972766
rcl1	-3.167	5.84943	2.74695	0.0974399	5.31943	5.91892	0.972766
tspan35	-3.16698	5.7854	2.74658	0.0974629	5.31943	5.91892	0.972766
noc4l	-3.16698	5.7182	2.74643	0.0974718	5.31943	5.91892	0.972766
phf6	-3.16697	5.718	2.7463	0.0974798	5.31943	5.91892	0.972766
asah1b	-2.07743	5.9696	2.74609	0.0974927	5.64123	6.50364	0.972766
srpx	-3.16883	5.71851	2.74538	0.0975359	5.31943	5.92041	0.972766
znfl2a	-3.16883	5.78592	2.74529	0.0975412	5.31943	5.92041	0.972766
bbox1	-1.52387	6.61266	2.74525	0.0975438	6.12722	7.03868	0.972766
mrgbp	-3.16883	5.78597	2.74519	0.0975475	5.31943	5.92041	0.972766
fzd10	-3.16691	5.97026	2.74463	0.0975816	5.31943	5.91892	0.972766
rasgrp3	-3.16884	5.84977	2.74384	0.0976297	5.31943	5.92041	0.972766
znf800a	-3.16686	5.71812	2.74347	0.0976527	5.31943	5.91892	0.972766
uxs1	-3.16686	5.91111	2.74347	0.0976527	5.31943	5.91892	0.972766
atad1b	-3.16686	5.78521	2.74343	0.0976551	5.31943	5.91892	0.972766
tm2d3	-3.16686	5.718	2.7434	0.0976568	5.31943	5.91892	0.972766
ppp2r2d	-3.16686	5.71787	2.74337	0.0976587	5.31943	5.91892	0.972766
fam210ab	-3.16884	5.85045	2.74332	0.0976615	5.31943	5.92041	0.972766
cttnbp2nlb	-3.16685	5.78558	2.74321	0.0976684	5.31943	5.91892	0.972766
zfand2a	-3.16685	5.84955	2.7432	0.0976691	5.31943	5.91892	0.972766
atp2a2b	-3.16884	5.71835	2.74286	0.0976898	5.31943	5.92041	0.972766
sptssa	-3.16884	5.71863	2.74255	0.0977086	5.31943	5.92041	0.972766
zgc:114104	-3.16884	5.71877	2.7424	0.0977176	5.31943	5.92041	0.972766
loxl1	1.67676	6.37068	2.74187	0.0977504	6.7797	5.92041	0.972766
itgb1bp1	-3.16884	5.91193	2.74138	0.0977805	5.31943	5.92041	0.972766
mrpl35	-3.16884	5.84977	2.7407	0.0978219	5.31943	5.92041	0.972766
tnnt1	-3.16884	5.71852	2.74051	0.0978332	5.31943	5.92041	0.972766
sema5a	-3.17198	5.85048	2.73854	0.0979543	5.31943	5.92215	0.972766
prpf4	-3.17199	5.85052	2.73848	0.0979578	5.31943	5.92215	0.972766
sdr39u1	-3.17199	5.85052	2.73833	0.0979674	5.31943	5.92215	0.972766
bcl7a	-3.16658	5.78545	2.73614	0.0981012	5.31943	5.91892	0.972766
ambra1b	-3.16885	5.71863	2.73609	0.0981045	5.31943	5.92041	0.972766
ptpn23a	-3.16657	6.18401	2.73584	0.0981199	5.31943	5.91892	0.972766
cthl	-3.16885	5.71859	2.73566	0.0981308	5.31943	5.92041	0.972766
thoc5	2.05801	6.0267	2.73561	0.0981343	6.48995	5.65793	0.972766
rhogd	-3.16656	5.71832	2.73552	0.0981397	5.31943	5.91892	0.972766
lrp2a	-3.16655	5.71824	2.73546	0.098143	5.31943	5.91892	0.972766
nif3l1	-3.16885	5.78572	2.73499	0.0981721	5.31943	5.92041	0.972766
sort1a	-3.16885	5.84969	2.73489	0.0981785	5.31943	5.92041	0.972766
ankfy1	-1.6976	6.23258	2.73436	0.0982107	5.90406	6.79351	0.972766
rhd	-3.16651	5.7854	2.73421	0.0982198	5.31943	5.91892	0.972766
fkbp9	-2.07662	5.78564	2.73393	0.0982372	5.64236	6.5052	0.972766
pdia3	-0.609535	8.3607	2.73312	0.0982874	8.27566	8.82919	0.972766
cox6a1	3.15916	5.97049	2.73273	0.098311	5.90512	5.33493	0.972766
mknk2a	-3.16645	5.96995	2.73264	0.0983167	5.31943	5.91892	0.972766
fam177a1	2.06291	6.02678	2.732	0.0983559	6.49166	5.65641	0.972766
acsl3b	-3.17229	5.78626	2.73182	0.0983669	5.31943	5.92215	0.972766
smurf2	3.15916	5.91138	2.73141	0.0983923	5.90512	5.33493	0.972766
ptges3b	-3.16639	5.71807	2.73112	0.0984101	5.31943	5.91892	0.972766
nfkbib	3.15916	5.91102	2.73	0.0984792	5.90512	5.33493	0.972766
fggy	-3.16885	5.71835	2.72989	0.0984858	5.31943	5.92041	0.972766
mmp14a	2.05835	6.13306	2.72935	0.0985192	6.48918	5.65641	0.972766
loxl2b	3.15917	5.97036	2.72897	0.0985426	5.90512	5.33493	0.972766
si:dkey-22o12.2	-3.17243	5.78619	2.72878	0.0985545	5.31943	5.92215	0.972766
azin1a	3.15917	5.84991	2.72878	0.0985548	5.90512	5.33493	0.972766
dus3l	-3.16886	5.97095	2.72872	0.0985582	5.31943	5.92041	0.972766
fem1a	-3.16629	5.71844	2.72857	0.0985675	5.31943	5.91892	0.972766
lta4h	3.15917	5.71836	2.72855	0.0985687	5.90512	5.33493	0.972766
lrrc1	3.15917	5.97086	2.72854	0.0985696	5.90512	5.33493	0.972766
adprhl1	-0.465554	9.50678	2.72838	0.0985793	9.17656	9.6219	0.972766
ncs1b	3.15917	5.78557	2.72704	0.0986623	5.90512	5.33493	0.972766
exoc5	3.15917	5.71836	2.72699	0.0986649	5.90512	5.33493	0.972766
snx11	3.15917	5.71836	2.7269	0.0986709	5.90512	5.33493	0.972766
nudt21	-3.16886	5.78573	2.72665	0.0986863	5.31943	5.92041	0.972766
si:dkeyp-84f3.5	-3.1662	5.91079	2.72631	0.0987071	5.31943	5.91892	0.972766
galnt2	-3.16886	5.7858	2.7262	0.0987138	5.31943	5.92041	0.972766
neurl1b	3.15917	6.08135	2.72572	0.0987438	5.90512	5.33493	0.972766
diablob	3.15917	5.71856	2.72532	0.0987686	5.90512	5.33493	0.972766
mfge8b	2.05957	6.18448	2.72531	0.0987689	6.49089	5.65793	0.972766
cdc27	3.15917	5.78544	2.7253	0.0987693	5.90512	5.33493	0.972766
brd1b	3.15917	5.78557	2.72524	0.0987731	5.90512	5.33493	0.972766
sh3gl3b	3.15917	5.91114	2.72521	0.0987754	5.90512	5.33493	0.972766
pole4	3.15917	5.71848	2.72518	0.0987771	5.90512	5.33493	0.972766
tle2a	-3.16886	5.97108	2.72509	0.0987828	5.31943	5.92041	0.972766
adgra2	3.16056	5.4962	2.72484	0.0987982	5.90595	5.33493	0.972766
gpx8	3.16056	5.64845	2.72484	0.0987982	5.90595	5.33493	0.972766
tmem119b	3.16056	5.64833	2.72484	0.0987982	5.90595	5.33493	0.972766
zgc:174310	3.16056	5.57431	2.72484	0.0987982	5.90595	5.33493	0.972766
atp2a1	3.16056	5.4962	2.72484	0.0987982	5.90595	5.33493	0.972766
kifap3b	3.16056	5.64841	2.72484	0.0987982	5.90595	5.33493	0.972766
zgc:113423	3.16056	5.4962	2.72484	0.0987982	5.90595	5.33493	0.972766
lyrm1	3.16056	5.64841	2.72484	0.0987982	5.90595	5.33493	0.972766
gatad2ab	3.16056	5.64853	2.72484	0.0987982	5.90595	5.33493	0.972766
si:dkey-42i9.7	3.16056	5.4962	2.72484	0.0987982	5.90595	5.33493	0.972766
furina	3.16056	5.4962	2.72484	0.0987982	5.90595	5.33493	0.972766
zgc:175284	3.16056	5.57431	2.72484	0.0987982	5.90595	5.33493	0.972766
hdac3	3.16056	5.57423	2.72484	0.0987982	5.90595	5.33493	0.972766
mob3a	3.16056	5.57423	2.72484	0.0987982	5.90595	5.33493	0.972766
siae	3.16056	5.64841	2.72484	0.0987982	5.90595	5.33493	0.972766
piwil2	3.16056	5.4962	2.72484	0.0987982	5.90595	5.33493	0.972766
mipol1	3.16056	5.4962	2.72484	0.0987982	5.90595	5.33493	0.972766
fbxo40.1	3.16056	5.64853	2.72484	0.0987982	5.90595	5.33493	0.972766
zgc:113426	3.16056	5.57431	2.72484	0.0987982	5.90595	5.33493	0.972766
hook2	3.16056	5.64841	2.72484	0.0987982	5.90595	5.33493	0.972766
meis1a	3.16056	5.64832	2.72484	0.0987982	5.90595	5.33493	0.972766
mgat4b	3.16056	5.64853	2.72484	0.0987982	5.90595	5.33493	0.972766
pnpo	3.16056	5.64832	2.72484	0.0987982	5.90595	5.33493	0.972766
m6pr	3.16056	5.64841	2.72484	0.0987982	5.90595	5.33493	0.972766
mitfb	3.16056	5.57423	2.72484	0.0987982	5.90595	5.33493	0.972766
palm1a	3.16056	5.64853	2.72484	0.0987982	5.90595	5.33493	0.972766
armt1	3.16056	5.57444	2.72484	0.0987982	5.90595	5.33493	0.972766
znrf2b	3.16056	5.4962	2.72484	0.0987982	5.90595	5.33493	0.972766
azi2	3.16056	5.64841	2.72484	0.0987982	5.90595	5.33493	0.972766
rps6ka1	3.16056	5.4962	2.72484	0.0987982	5.90595	5.33493	0.972766
haus6	3.16056	5.57444	2.72484	0.0987982	5.90595	5.33493	0.972766
kif23	3.16056	5.64845	2.72484	0.0987982	5.90595	5.33493	0.972766
polr2k	3.16056	5.64841	2.72484	0.0987982	5.90595	5.33493	0.972766
shisa3	3.16056	5.4962	2.72484	0.0987982	5.90595	5.33493	0.972766
scoca	3.16056	5.64829	2.72484	0.0987982	5.90595	5.33493	0.972766
pmm2	3.16056	5.4962	2.72484	0.0987982	5.90595	5.33493	0.972766
eny2	3.16056	5.4962	2.72484	0.0987982	5.90595	5.33493	0.972766
nudt1	3.16056	5.57419	2.72484	0.0987982	5.90595	5.33493	0.972766
cited2	3.16056	5.64866	2.72484	0.0987982	5.90595	5.33493	0.972766
npm1b	3.16056	5.64832	2.72484	0.0987982	5.90595	5.33493	0.972766
mfsd8	3.16056	5.64853	2.72484	0.0987982	5.90595	5.33493	0.972766
sdf2	3.16056	5.57431	2.72484	0.0987982	5.90595	5.33493	0.972766
tpst1l	3.16056	5.57444	2.72484	0.0987982	5.90595	5.33493	0.972766
timp2b	3.16056	5.64821	2.72484	0.0987982	5.90595	5.33493	0.972766
znhit2	3.16056	5.64821	2.72484	0.0987982	5.90595	5.33493	0.972766
si:ch211-57i17.1	3.16057	5.91172	2.72474	0.0988041	5.90595	5.33493	0.972766
ugt1b1	-3.17263	5.78643	2.7243	0.0988312	5.31943	5.92215	0.972766
rnf111	3.15917	5.91182	2.72357	0.0988765	5.90512	5.33493	0.972766
ptgdsb.2	3.15917	5.78581	2.72348	0.0988819	5.90512	5.33493	0.972766
tmx3b	3.15917	5.71848	2.72347	0.0988827	5.90512	5.33493	0.972766
dvl2	3.15917	5.78564	2.72342	0.0988862	5.90512	5.33493	0.972766
ddi2	3.15917	5.78594	2.72339	0.098888	5.90512	5.33493	0.972766
rasgef1ba	3.15917	5.71868	2.72328	0.0988947	5.90512	5.33493	0.972766
cyp1d1	3.15917	5.78564	2.72318	0.098901	5.90512	5.33493	0.972766
heatr5a	3.15917	5.78594	2.72308	0.0989072	5.90512	5.33493	0.972766
zgc:112052	3.15917	5.78581	2.72307	0.0989076	5.90512	5.33493	0.972766
rbm4.1	3.15917	5.64812	2.72294	0.0989158	5.90512	5.33493	0.972766
gpatch2	3.15917	5.64812	2.72294	0.0989158	5.90512	5.33493	0.972766
zgc:66440	3.15917	5.64812	2.72294	0.0989158	5.90512	5.33493	0.972766
si:dkey-20i10.7	3.15917	5.64812	2.72294	0.0989158	5.90512	5.33493	0.972766
adam9	3.15917	5.64795	2.72294	0.0989158	5.90512	5.33493	0.972766
inpp5l	3.15917	5.49587	2.72294	0.0989158	5.90512	5.33493	0.972766
rab11fip4b	3.15917	5.49587	2.72294	0.0989158	5.90512	5.33493	0.972766
col4a3bpa	3.15917	5.57389	2.72294	0.0989158	5.90512	5.33493	0.972766
alkbh2	3.15917	5.49587	2.72294	0.0989158	5.90512	5.33493	0.972766
wnt2ba	3.15917	5.49587	2.72294	0.0989158	5.90512	5.33493	0.972766
col5a3a	3.15917	5.49587	2.72294	0.0989158	5.90512	5.33493	0.972766
spc24	3.15917	5.49587	2.72294	0.0989158	5.90512	5.33493	0.972766
fam49ba	3.15917	5.49587	2.72294	0.0989158	5.90512	5.33493	0.972766
nr2f6a	3.15917	5.49587	2.72294	0.0989158	5.90512	5.33493	0.972766
glmna	3.15917	5.57389	2.72294	0.0989158	5.90512	5.33493	0.972766
sirt3	3.15917	5.49587	2.72294	0.0989158	5.90512	5.33493	0.972766
ttc21b	3.15917	5.49587	2.72294	0.0989158	5.90512	5.33493	0.972766
nme7	3.15917	5.57389	2.72294	0.0989158	5.90512	5.33493	0.972766
sgk3	3.15917	5.57389	2.72294	0.0989158	5.90512	5.33493	0.972766
slc35c2	3.15917	5.57398	2.72294	0.0989158	5.90512	5.33493	0.972766
wwtr1	3.15917	5.57398	2.72294	0.0989158	5.90512	5.33493	0.972766
pigx	3.15917	5.57389	2.72294	0.0989158	5.90512	5.33493	0.972766
mettl6	3.15917	5.57398	2.72294	0.0989158	5.90512	5.33493	0.972766
vps36	3.15917	5.57398	2.72294	0.0989158	5.90512	5.33493	0.972766
grb2a	3.15917	5.49587	2.72294	0.0989158	5.90512	5.33493	0.972766
ilkap	3.15917	5.49587	2.72294	0.0989158	5.90512	5.33493	0.972766
jag1a	3.15917	5.49587	2.72294	0.0989158	5.90512	5.33493	0.972766
psen2	3.15917	5.57389	2.72294	0.0989158	5.90512	5.33493	0.972766
tasp1	3.15917	5.49587	2.72294	0.0989158	5.90512	5.33493	0.972766
babam1	3.15917	5.49587	2.72294	0.0989158	5.90512	5.33493	0.972766
tmem54a	3.15917	5.49587	2.72294	0.0989158	5.90512	5.33493	0.972766
dolpp1	3.15917	5.49587	2.72294	0.0989158	5.90512	5.33493	0.972766
fam110b	3.15917	5.64783	2.72294	0.0989158	5.90512	5.33493	0.972766
comtb	3.15917	5.49587	2.72294	0.0989158	5.90512	5.33493	0.972766
slc16a8	3.15917	5.49587	2.72294	0.0989158	5.90512	5.33493	0.972766
cdc37l1	3.15917	5.49587	2.72294	0.0989158	5.90512	5.33493	0.972766
csgalnact2	3.15917	5.64795	2.72294	0.0989158	5.90512	5.33493	0.972766
ercc4	3.15917	5.57398	2.72294	0.0989158	5.90512	5.33493	0.972766
galm	3.15917	5.49587	2.72294	0.0989158	5.90512	5.33493	0.972766
zgc:194981	3.15917	5.57398	2.72294	0.0989158	5.90512	5.33493	0.972766
abi2a	3.15917	5.49587	2.72294	0.0989158	5.90512	5.33493	0.972766
rwdd2b	3.15917	5.57389	2.72294	0.0989158	5.90512	5.33493	0.972766
pnkd	3.15917	5.49587	2.72294	0.0989158	5.90512	5.33493	0.972766
rabl2	3.15917	5.49587	2.72294	0.0989158	5.90512	5.33493	0.972766
paxx	3.15917	5.64783	2.72294	0.0989158	5.90512	5.33493	0.972766
si:dkey-103i16.6	3.15917	5.49587	2.72294	0.0989158	5.90512	5.33493	0.972766
znf710a	3.15917	5.57398	2.72294	0.0989158	5.90512	5.33493	0.972766
chrnb1	3.15917	5.49587	2.72294	0.0989158	5.90512	5.33493	0.972766
cd276	3.15917	5.57389	2.72294	0.0989158	5.90512	5.33493	0.972766
zbtb1	3.15917	5.49587	2.72294	0.0989158	5.90512	5.33493	0.972766
gabrr3a	3.15917	5.49587	2.72294	0.0989158	5.90512	5.33493	0.972766
trim35-1	3.15917	5.49587	2.72294	0.0989158	5.90512	5.33493	0.972766
nol12	3.15917	5.57389	2.72294	0.0989158	5.90512	5.33493	0.972766
cyp46a1.2	3.15917	5.49587	2.72294	0.0989158	5.90512	5.33493	0.972766
nop16	3.15917	5.64795	2.72294	0.0989158	5.90512	5.33493	0.972766
cisd2	3.15917	5.49587	2.72294	0.0989158	5.90512	5.33493	0.972766
def8	3.15917	5.6482	2.72294	0.0989158	5.90512	5.33493	0.972766
mcm3	3.15917	5.49587	2.72294	0.0989158	5.90512	5.33493	0.972766
ccl38.6	3.15917	5.57389	2.72294	0.0989158	5.90512	5.33493	0.972766
tbc1d13	3.15917	5.49587	2.72294	0.0989158	5.90512	5.33493	0.972766
exosc8	3.15917	5.64795	2.72294	0.0989158	5.90512	5.33493	0.972766
etv5a	3.15917	5.57389	2.72294	0.0989158	5.90512	5.33493	0.972766
cnot11	3.15917	5.5741	2.72294	0.0989158	5.90512	5.33493	0.972766
xpr1a	3.15917	5.57385	2.72294	0.0989158	5.90512	5.33493	0.972766
ccdc102a	3.15917	5.64833	2.72294	0.0989158	5.90512	5.33493	0.972766
rorca	3.15917	5.57385	2.72294	0.0989158	5.90512	5.33493	0.972766
cbx2	3.15917	5.57385	2.72294	0.0989158	5.90512	5.33493	0.972766
mpz	3.15917	5.64833	2.72294	0.0989158	5.90512	5.33493	0.972766
tm9sf1	3.15917	5.64808	2.72294	0.0989158	5.90512	5.33493	0.972766
dnal4b	3.15917	5.57385	2.72294	0.0989158	5.90512	5.33493	0.972766
slc7a7	3.15917	5.57385	2.72294	0.0989158	5.90512	5.33493	0.972766
ttpa	3.15917	5.64787	2.72294	0.0989158	5.90512	5.33493	0.972766
ogna	3.15917	5.57385	2.72294	0.0989158	5.90512	5.33493	0.972766
commd5	3.15917	5.64808	2.72294	0.0989158	5.90512	5.33493	0.972766
ripor2	3.15917	5.648	2.72294	0.0989158	5.90512	5.33493	0.972766
rbfa	3.15917	5.64787	2.72294	0.0989158	5.90512	5.33493	0.972766
lsm5	3.15917	5.64833	2.72294	0.0989158	5.90512	5.33493	0.972766
rgp1	3.15917	5.5741	2.72294	0.0989158	5.90512	5.33493	0.972766
il1fma	3.15917	5.57385	2.72294	0.0989158	5.90512	5.33493	0.972766
rdh10a	3.15917	5.648	2.72294	0.0989158	5.90512	5.33493	0.972766
csf3r	3.15917	5.57385	2.72294	0.0989158	5.90512	5.33493	0.972766
grcc10	3.15917	5.5741	2.72294	0.0989158	5.90512	5.33493	0.972766
ptbp2b	3.15917	5.64808	2.72294	0.0989158	5.90512	5.33493	0.972766
slc10a3	3.15917	5.57385	2.72294	0.0989158	5.90512	5.33493	0.972766
smfn	3.15917	5.57385	2.72294	0.0989158	5.90512	5.33493	0.972766
tecpr2	3.15917	5.57385	2.72294	0.0989158	5.90512	5.33493	0.972766
psmb12	3.15917	5.57385	2.72294	0.0989158	5.90512	5.33493	0.972766
rxrgb	3.15917	5.5741	2.72294	0.0989158	5.90512	5.33493	0.972766
stx2a	3.15917	5.64787	2.72294	0.0989158	5.90512	5.33493	0.972766
serpinb1l1	3.15723	5.96973	2.72241	0.0989483	5.90406	5.33493	0.972766
zgc:77151	3.16066	5.78589	2.72224	0.0989593	5.90595	5.33493	0.972766
psmb6	2.05788	6.18458	2.72217	0.0989637	6.48995	5.65793	0.972766
actr2a	3.16067	5.78577	2.72214	0.0989651	5.90595	5.33493	0.972766
eefsec	-3.16886	5.78555	2.72203	0.0989722	5.31943	5.92041	0.972766
tarbp2	-3.17273	5.78618	2.72201	0.0989732	5.31943	5.92215	0.972766
pdlim3b	3.15917	5.78581	2.72168	0.098994	5.90512	5.33493	0.972766
kctd7	3.15917	5.78564	2.72097	0.099038	5.90512	5.33493	0.972766
sh3bp5la	-3.16887	5.78597	2.72089	0.099043	5.31943	5.92041	0.972766
bcas3	3.15917	5.85015	2.72086	0.0990447	5.90512	5.33493	0.972766
acot9.2	3.15917	5.71873	2.7205	0.0990672	5.90512	5.33493	0.972766
bag6l	-3.16597	5.71812	2.72022	0.0990843	5.31943	5.91892	0.972766
dtx2	-3.16887	5.78536	2.72016	0.099088	5.31943	5.92041	0.972766
bmp10	-1.52659	6.32737	2.72009	0.0990922	6.12722	7.04009	0.972766
ppm1ba	3.16075	5.7859	2.72002	0.0990968	5.90595	5.33493	0.972766
twnk	3.15715	5.91112	2.71999	0.0990985	5.90406	5.33493	0.972766
commd2	3.16075	5.71894	2.71991	0.0991038	5.90595	5.33493	0.972766
slc47a2.2	-3.16887	5.91099	2.71973	0.0991148	5.31943	5.92041	0.972766
mesd	3.15714	5.57369	2.7197	0.0991166	5.90406	5.33493	0.972766
pltp	3.15714	5.49545	2.7197	0.0991166	5.90406	5.33493	0.972766
galns	3.15714	5.57356	2.7197	0.0991166	5.90406	5.33493	0.972766
pomt1	3.15714	5.49545	2.7197	0.0991166	5.90406	5.33493	0.972766
snrnp25	3.15714	5.49545	2.7197	0.0991166	5.90406	5.33493	0.972766
gosr2	3.15714	5.64742	2.7197	0.0991166	5.90406	5.33493	0.972766
zgc:171506	3.15714	5.49545	2.7197	0.0991166	5.90406	5.33493	0.972766
jund	3.15714	5.49545	2.7197	0.0991166	5.90406	5.33493	0.972766
rab12	3.15714	5.57356	2.7197	0.0991166	5.90406	5.33493	0.972766
wipf1a	3.15714	5.49545	2.7197	0.0991166	5.90406	5.33493	0.972766
bmi1b	3.15714	5.64767	2.7197	0.0991166	5.90406	5.33493	0.972766
mxc	3.15714	5.49545	2.7197	0.0991166	5.90406	5.33493	0.972766
plxnb2b	3.15714	5.57356	2.7197	0.0991166	5.90406	5.33493	0.972766
ccl34b.4	3.15714	5.57348	2.7197	0.0991166	5.90406	5.33493	0.972766
selenoi	3.15714	5.49545	2.7197	0.0991166	5.90406	5.33493	0.972766
shda	3.15714	5.49545	2.7197	0.0991166	5.90406	5.33493	0.972766
dock11	3.15714	5.64742	2.7197	0.0991166	5.90406	5.33493	0.972766
mef2b	3.15714	5.49545	2.7197	0.0991166	5.90406	5.33493	0.972766
si:dkey-147f3.4	3.15714	5.57348	2.7197	0.0991166	5.90406	5.33493	0.972766
efnb3b	3.15714	5.49545	2.7197	0.0991166	5.90406	5.33493	0.972766
prkcbb	3.15714	5.49545	2.7197	0.0991166	5.90406	5.33493	0.972766
ttc38	3.15714	5.57369	2.7197	0.0991166	5.90406	5.33493	0.972766
hacd3	3.15714	5.57348	2.7197	0.0991166	5.90406	5.33493	0.972766
rgs17	3.15714	5.57369	2.7197	0.0991166	5.90406	5.33493	0.972766
fbxl3b	3.15714	5.57356	2.7197	0.0991166	5.90406	5.33493	0.972766
pnp4a	3.15714	5.49545	2.7197	0.0991166	5.90406	5.33493	0.972766
wdfy2	3.15714	5.57369	2.7197	0.0991166	5.90406	5.33493	0.972766
zswim6	3.15714	5.57369	2.7197	0.0991166	5.90406	5.33493	0.972766
kat5b	3.15714	5.49545	2.7197	0.0991166	5.90406	5.33493	0.972766
id4	3.15714	5.57369	2.7197	0.0991166	5.90406	5.33493	0.972766
ptpn1	3.15714	5.49545	2.7197	0.0991166	5.90406	5.33493	0.972766
tnfsf10l4	3.15714	5.49545	2.7197	0.0991166	5.90406	5.33493	0.972766
hmces	3.15714	5.57356	2.7197	0.0991166	5.90406	5.33493	0.972766
ddit4	3.15714	5.57348	2.7197	0.0991166	5.90406	5.33493	0.972766
sae1	3.15714	5.49545	2.7197	0.0991166	5.90406	5.33493	0.972766
s100a11	3.15714	5.49545	2.7197	0.0991166	5.90406	5.33493	0.972766
arhgap17a	3.15714	5.49545	2.7197	0.0991166	5.90406	5.33493	0.972766
rab3db	3.15714	5.57348	2.7197	0.0991166	5.90406	5.33493	0.972766
styx	3.15714	5.57348	2.7197	0.0991166	5.90406	5.33493	0.972766
rrnad1	3.15714	5.49545	2.7197	0.0991166	5.90406	5.33493	0.972766
ncaldb	3.15714	5.57348	2.7197	0.0991166	5.90406	5.33493	0.972766
dut	3.15714	5.49545	2.7197	0.0991166	5.90406	5.33493	0.972766
elac1	3.15714	5.49545	2.7197	0.0991166	5.90406	5.33493	0.972766
ssrp1a	3.15714	5.57369	2.7197	0.0991166	5.90406	5.33493	0.972766
gemin4	3.15714	5.57369	2.7197	0.0991166	5.90406	5.33493	0.972766
paics	3.15714	5.64779	2.7197	0.0991166	5.90406	5.33493	0.972766
rnf181	3.15714	5.57369	2.7197	0.0991166	5.90406	5.33493	0.972766
zgc:113220	3.15714	5.49545	2.7197	0.0991166	5.90406	5.33493	0.972766
cdc23	3.15714	5.57356	2.7197	0.0991166	5.90406	5.33493	0.972766
jade3	3.15714	5.64758	2.7197	0.0991166	5.90406	5.33493	0.972766
cygb2	3.15714	5.64767	2.7197	0.0991166	5.90406	5.33493	0.972766
socs6b	3.15714	5.64767	2.7197	0.0991166	5.90406	5.33493	0.972766
arl6ip4	3.15714	5.64759	2.7197	0.0991166	5.90406	5.33493	0.972766
chp2	3.15714	5.64767	2.7197	0.0991166	5.90406	5.33493	0.972766
cntfr	3.15714	5.64792	2.7197	0.0991166	5.90406	5.33493	0.972766
mterf2	3.15714	5.64771	2.7197	0.0991166	5.90406	5.33493	0.972766
ormdl3	3.15714	5.64767	2.7197	0.0991166	5.90406	5.33493	0.972766
ddx28	3.15714	5.64767	2.7197	0.0991166	5.90406	5.33493	0.972766
ptprma	3.15714	5.64792	2.7197	0.0991166	5.90406	5.33493	0.972766
plxna1b	3.15714	5.64747	2.7197	0.0991166	5.90406	5.33493	0.972766
gtf2b	3.15714	5.64747	2.7197	0.0991166	5.90406	5.33493	0.972766
tle3b	3.15714	5.64747	2.7197	0.0991166	5.90406	5.33493	0.972766
stx10	3.15714	5.64747	2.7197	0.0991166	5.90406	5.33493	0.972766
nenf	3.15714	5.57344	2.7197	0.0991166	5.90406	5.33493	0.972766
tpi1a	3.15714	5.57344	2.7197	0.0991166	5.90406	5.33493	0.972766
zfpm2b	3.15714	5.57344	2.7197	0.0991166	5.90406	5.33493	0.972766
apeh	-1.69383	6.18417	2.71905	0.0991571	5.90595	6.79351	0.972766
atg4c	-3.16592	5.84955	2.71884	0.0991702	5.31943	5.91892	0.972766
morf4l1	-1.70092	6.45645	2.71866	0.099181	5.90512	6.79768	0.972766
lrrc8aa	3.15918	5.78581	2.71859	0.0991854	5.90512	5.33493	0.972766
wu:fa19b12	3.1571	5.96998	2.71851	0.0991907	5.90406	5.33493	0.972766
eef1akmt1	-3.16887	5.71847	2.71844	0.0991948	5.31943	5.92041	0.972766
zgc:63587	3.15918	5.78581	2.71837	0.0991992	5.90512	5.33493	0.972766
atl3	3.15918	5.71873	2.71788	0.0992297	5.90512	5.33493	0.972766
nudt9	3.16084	6.08198	2.71771	0.0992406	5.90595	5.33493	0.972766
pdpk1a	3.15707	5.71821	2.71768	0.0992419	5.90406	5.33493	0.972766
rxrba	3.15707	5.78516	2.71764	0.0992449	5.90406	5.33493	0.972766
ube2nb	-2.074	6.13339	2.71751	0.0992528	5.64236	6.50364	0.972766
prkaa1	-3.16887	5.71877	2.71734	0.0992633	5.31943	5.92041	0.972766
pdcl	1.67916	6.28105	2.71644	0.0993194	6.78132	5.92041	0.972766
ftr14	-2.0788	5.97033	2.71631	0.0993277	5.64236	6.50661	0.972766
mtif2	3.15702	6.08129	2.71613	0.0993387	5.90406	5.33493	0.972766
mrpl21	3.15918	5.7862	2.71562	0.0993706	5.90512	5.33493	0.972766
znf76	3.15918	5.71844	2.71557	0.0993736	5.90512	5.33493	0.972766
med6	3.15699	5.71816	2.71521	0.0993957	5.90406	5.33493	0.972766
nkiras2	3.16096	5.71889	2.71468	0.0994292	5.90595	5.33493	0.972766
smarcd3b	3.16097	5.71894	2.71432	0.0994513	5.90595	5.33493	0.972766
ythdf3	3.16098	5.78622	2.7141	0.0994653	5.90595	5.33493	0.972766
mospd2	3.16098	5.78614	2.71408	0.0994664	5.90595	5.33493	0.972766
ndufv2	0.555321	8.48527	2.71392	0.0994761	9.04821	8.54492	0.972766
abce1	-2.07979	6.13328	2.71389	0.0994784	5.64123	6.5052	0.972766
hiat1b	-3.16887	5.78577	2.71382	0.0994825	5.31943	5.92041	0.972766
hint2	3.16099	5.71914	2.71377	0.0994854	5.90595	5.33493	0.972766
cox14	1.39052	6.45705	2.7131	0.0995277	7.22885	6.33895	0.972766
pex3	3.15918	5.71856	2.71305	0.0995307	5.90512	5.33493	0.972766
hprt1	2.0633	6.0269	2.71303	0.0995315	6.49166	5.65641	0.972766
plce1	3.15918	5.71844	2.71255	0.0995617	5.90512	5.33493	0.972766
pcmtd2	3.15918	5.71847	2.71233	0.0995753	5.90512	5.33493	0.972766
cldn7a	3.15689	5.71783	2.71217	0.0995855	5.90406	5.33493	0.972766
ephx1	3.15689	5.71808	2.71214	0.0995875	5.90406	5.33493	0.972766
ppifa	-3.16565	5.71832	2.71155	0.0996244	5.31943	5.91892	0.972766
pgp	3.16109	6.0274	2.7111	0.0996524	5.90595	5.33493	0.972766
si:ch73-281n10.2	-1.51334	6.61143	2.71098	0.0996599	6.12803	7.03338	0.972766
map4k2	3.16111	5.91177	2.71071	0.0996766	5.90595	5.33493	0.972766
lhpp	3.15918	5.71868	2.71055	0.0996864	5.90512	5.33493	0.972766
eif4eb	2.05625	6.08078	2.70657	0.0999354	6.48918	5.65793	0.972766
txlng	3.15666	5.71828	2.70535	0.100012	5.90406	5.33493	0.972766
mlxip	3.15665	5.71804	2.70506	0.10003	5.90406	5.33493	0.972766
zgc:77197	-3.16889	5.78568	2.70475	0.10005	5.31943	5.92041	0.972766
lclat1	3.15919	5.97073	2.70386	0.100105	5.90512	5.33493	0.972766
zgc:113518	3.15919	5.78532	2.70372	0.100114	5.90512	5.33493	0.972766
si:ch211-133n4.4	1.67455	6.37122	2.70311	0.100153	6.7797	5.92215	0.972766
fam160b2	3.15656	5.96993	2.70219	0.10021	5.90406	5.33493	0.972766
nr2f2	1.67551	6.18369	2.70189	0.100229	6.77896	5.92041	0.972766
smim7	-3.16527	5.84943	2.70158	0.100249	5.31943	5.91892	0.972766
edc3	3.15919	5.97048	2.70131	0.100266	5.90512	5.33493	0.972766
si:dkey-169i5.4	3.15652	5.71795	2.70098	0.100286	5.90406	5.33493	0.972766
lyrm4	3.16148	5.78585	2.70089	0.100292	5.90595	5.33493	0.972766
namptb	-3.16889	5.71835	2.70076	0.100301	5.31943	5.92041	0.972766
acad11	-3.16522	5.71812	2.70019	0.100336	5.31943	5.91892	0.972766
fryl	-1.64092	6.90999	2.69961	0.100373	6.48841	7.6538	0.972766
sap130a	3.15647	5.71821	2.69954	0.100377	5.90406	5.33493	0.972766
syt1a	1.65638	7.28236	2.69829	0.100456	7.64694	6.50224	0.972766
si:ch73-109d9.2	3.16162	5.97087	2.69705	0.100534	5.90595	5.33493	0.972766
nt5c2b	3.1592	5.91139	2.69587	0.100608	5.90512	5.33493	0.972766
btbd9	3.16171	5.71902	2.69462	0.100687	5.90595	5.33493	0.972766
vgll4b	3.1592	5.84983	2.69455	0.100692	5.90512	5.33493	0.972766
dhx16	-3.1689	5.78568	2.69412	0.100719	5.31943	5.92041	0.972766
plxdc2	3.16175	5.78601	2.69363	0.10075	5.90595	5.33493	0.972766
gnai1	0.971114	7.30334	2.69279	0.100803	7.78051	7.03338	0.972766
irf2a	-3.16494	5.78537	2.69255	0.100818	5.31943	5.91892	0.972766
clasp1a	3.15623	5.78554	2.69214	0.100844	5.90406	5.33493	0.972766
si:ch211-244b2.2	3.1592	5.71835	2.69125	0.100901	5.90512	5.33493	0.972766
pdlim4	3.16188	5.84998	2.69026	0.100963	5.90595	5.33493	0.972766
commd1	3.1592	5.78589	2.69018	0.100969	5.90512	5.33493	0.972766
med27	3.15611	5.71796	2.68854	0.101072	5.90406	5.33493	0.972766
hmbsa	3.15611	5.78529	2.68843	0.101079	5.90406	5.33493	0.972766
mhc2b	3.1561	5.91064	2.68796	0.101109	5.90406	5.33493	0.972766
gpr107	2.05952	6.13384	2.68795	0.10111	6.49089	5.65793	0.972766
sh3bgrl2	-3.17424	5.71898	2.68732	0.10115	5.31943	5.92215	0.972766
prkag1	3.15605	6.08158	2.68645	0.101205	5.90406	5.33493	0.972766
zgc:85722	2.06385	5.97055	2.68605	0.10123	6.49166	5.65641	0.972766
rnf146	-3.17434	5.71911	2.68497	0.101299	5.31943	5.92215	0.972766
itgb5	3.15921	5.78581	2.68402	0.101359	5.90512	5.33493	0.972766
kcnk6	3.15921	5.7186	2.68397	0.101363	5.90512	5.33493	0.972766
ythdf1	-3.16891	5.85007	2.68357	0.101388	5.31943	5.92041	0.972766
ndufa11	0.850245	7.49654	2.68328	0.101407	8.02156	7.33515	0.972766
fkbp5	2.31142	6.75524	2.68174	0.101505	6.6433	5.65793	0.972766
efemp2b	1.21081	6.75298	2.68103	0.10155	7.32092	6.50661	0.972766
fgf3	3.15584	5.78529	2.68011	0.101609	5.90406	5.33493	0.972766
nr4a1	1.67534	6.28016	2.67993	0.10162	6.77896	5.92041	0.972766
setd1ba	3.1623	5.78646	2.67868	0.1017	5.90595	5.33493	0.972766
sh3glb1b	-3.16893	5.78585	2.67324	0.102048	5.31943	5.92041	0.972766
mob1bb	-3.16893	5.91173	2.67274	0.10208	5.31943	5.92041	0.972766
zmp:0000000722	-0.528808	9.45312	2.67224	0.102112	9.10208	9.60537	0.972766
ppp5c	1.67701	6.23247	2.6658	0.102526	6.77896	5.91892	0.972766
stard3	-3.16394	5.78508	2.66494	0.102582	5.31943	5.91892	0.972766
srebf1	3.16287	5.971	2.66303	0.102705	5.90595	5.33493	0.972766
spast	-3.16894	5.78584	2.66242	0.102744	5.31943	5.92041	0.972766
med15	-3.16383	5.71811	2.66175	0.102788	5.31943	5.91892	0.972766
tsc1b	-1.69926	6.41463	2.66166	0.102793	5.90512	6.79633	0.972766
otud7b	3.15526	5.71833	2.66157	0.102799	5.90406	5.33493	0.972766
gnsa	1.21099	6.6475	2.66132	0.102815	7.32025	6.5052	0.972766
fitm2	-3.16379	5.78532	2.66063	0.10286	5.31943	5.91892	0.972766
mettl26	3.1551	5.71808	2.65648	0.103129	5.90406	5.33493	0.972766
zgc:55733	-1.70211	6.37072	2.65496	0.103227	5.90406	6.79633	0.972766
n6amt1	3.15498	5.91112	2.65278	0.103369	5.90406	5.33493	0.972766
tomm40l	-3.16349	5.91068	2.65227	0.103402	5.31943	5.91892	0.972766
txn2	1.14676	7.08174	2.65064	0.103508	7.6416	6.79768	0.972766
sgk2a	-3.16337	5.71783	2.64891	0.103621	5.31943	5.91892	0.972766
eya2	-3.17585	5.78658	2.6484	0.103654	5.31943	5.92215	0.972766
ube3c	3.16346	6.02687	2.6462	0.103798	5.90595	5.33493	0.972766
aif1l	-3.17597	5.71906	2.64548	0.103845	5.31943	5.92215	0.972766
macc1	3.15472	5.71804	2.64437	0.103918	5.90406	5.33493	0.972766
txnrd2.2	1.67256	6.23322	2.64364	0.103965	6.77896	5.92215	0.972766
emc6	3.15925	5.71836	2.63551	0.104499	5.90512	5.33493	0.972766
tspan18b	-3.16897	5.71872	2.63271	0.104683	5.31943	5.92041	0.972766
mrtfab	1.67702	6.0256	2.63002	0.10486	6.77896	5.91892	0.972766
tax1bp1a	1.50453	6.57508	2.62717	0.105049	7.02314	6.14223	0.972766
apool	1.49201	6.36998	2.62324	0.105309	7.01935	6.1439	0.972766
atp2b1a	3.16434	5.91164	2.62044	0.105495	5.90595	5.33493	0.972766
ppil2	3.1645	5.78614	2.61579	0.105805	5.90595	5.33493	0.972766
mtmr6	3.15927	5.7186	2.61556	0.10582	5.90512	5.33493	0.972766
ccdc28b	3.15927	6.02678	2.61554	0.105821	5.90512	5.33493	0.972766
ddx55	3.15376	5.71796	2.61272	0.10601	5.90406	5.33493	0.972766
ppcs	3.15927	5.71868	2.60744	0.106363	5.90512	5.33493	0.972766
zgc:56304	-1.69731	6.41307	2.60253	0.106693	5.90406	6.79351	0.972766
acap1	3.15928	5.91158	2.60046	0.106833	5.90512	5.33493	0.972766
tlk1a	-3.16901	6.08133	2.59981	0.106876	5.31943	5.92041	0.972766
kat7b	-1.69178	6.3261	2.5997	0.106884	5.90512	6.79203	0.972766
ptpn23b	2.05424	5.91081	2.59314	0.107327	6.48918	5.65793	0.972766
kars	0.545985	8.97156	2.59259	0.107364	9.22826	8.7275	0.972766
pip5k1ab	3.1654	5.71889	2.58839	0.107649	5.90595	5.33493	0.972766
uqcc1	1.21357	6.81808	2.58499	0.107881	7.32092	6.50364	0.972766
map1lc3b	-2.07603	6.61175	2.57916	0.108279	5.64123	6.50364	0.972766
atg3	1.67277	6.23217	2.57451	0.108598	6.77822	5.92041	0.972766
hsd11b2	-0.628066	9.127	2.57083	0.10885	8.74589	9.33302	0.972766
rsl1d1	-0.990208	7.49777	2.57	0.108908	6.90502	7.65967	0.972766
akr7a3	2.05929	6.41484	2.56814	0.109036	6.49089	5.65793	0.972766
ppm1bb	0.971318	7.15982	2.5658	0.109197	7.78179	7.03609	0.972766
snx1a	1.04899	7.32662	2.56199	0.10946	7.71302	6.92387	0.972766
erg	-1.23251	6.94185	2.55912	0.10966	6.49089	7.33637	0.972766
mtx2	-1.41074	6.88167	2.55888	0.109676	6.32132	7.24262	0.972766
atp1a3b	-0.609624	10.5549	2.55109	0.110218	9.84735	10.4413	0.972766
mlf1	-1.70331	6.78757	2.54155	0.110886	5.90406	6.79633	0.972766
hopx	-1.28178	6.6124	2.53995	0.110998	6.32035	7.14495	0.972766
grnaas	3.0687	5.68584	2.53802	0.111134	5.87209	5.33493	0.972766
rtn1a	-0.682282	8.7933	2.53723	0.11119	8.48857	9.11653	0.972766
nubpl	-3.16908	5.8507	2.53347	0.111455	5.31943	5.92041	0.972766
gskip	-1.09538	7.0819	2.53236	0.111533	6.64254	7.42455	0.972766
usp12a	-2.07563	5.84913	2.52419	0.112112	5.64123	6.50364	0.972766
rpl5b	-0.275526	10.7669	2.51449	0.112804	10.4806	10.753	0.972766
nek7	-1.27983	6.61214	2.51306	0.112907	6.32132	7.14368	0.972766
igfbp2a	1.6833	6.13452	2.5068	0.113356	6.78206	5.92041	0.972766
lfng	1.16821	7.16021	2.50394	0.113562	7.48955	6.66225	0.972766
slmapb	-2.06622	6.02606	2.50354	0.113591	5.64236	6.50224	0.972766
eef1a1l2	-0.336244	11.5697	2.50202	0.1137	10.9899	11.3242	0.972766
kidins220b	1.49745	6.45449	2.49386	0.114291	7.01935	6.14077	0.972766
calm1a	-0.796216	7.78824	2.48573	0.114883	7.56998	8.24667	0.972766
elovl1b	-1.27876	6.85002	2.47897	0.115378	6.32035	7.14103	0.972766
rnf207b	0.554251	8.54503	2.47491	0.115676	8.96433	8.46471	0.972766
bco2l	-3.15776	5.78491	2.47439	0.115714	5.31943	5.91892	0.972766
cbr1	-1.28223	6.71836	2.47324	0.115799	6.31859	7.14241	0.972766
cdk5rap3	2.06258	6.08163	2.46798	0.116187	6.49166	5.65793	0.972766
psma5	1.26015	6.68387	2.46516	0.116396	7.12827	6.33429	0.972766
tor1	3.14958	5.71795	2.46068	0.116729	5.90406	5.33493	0.972766
coq10b	1.25939	6.78552	2.45886	0.116863	7.12747	6.33429	0.972766
ndufb8	0.660596	8.39221	2.45862	0.116882	8.49015	7.91831	0.972766
kpnb1	-0.874379	7.7699	2.45748	0.116967	7.31948	8.03709	0.972766
ccdc9	3.14922	6.0811	2.44657	0.117782	5.90406	5.33493	0.972766
rars	-2.07045	6.02563	2.44455	0.117934	5.64123	6.50224	0.972766
b2m	-0.6579	10.048	2.44294	0.118055	9.90754	10.5493	0.972766
cdc37	1.20967	7.00072	2.44051	0.118238	7.32169	6.50817	0.972766
rpl27	-0.380047	9.88296	2.4391	0.118344	9.69567	10.066	0.972766
g3bp1	-1.24083	7.28222	2.43832	0.118403	6.48918	7.33892	0.972766
atp5mf	0.638272	8.67629	2.43457	0.118686	9.12872	8.54857	0.972766
rpl17	-0.333419	10.5385	2.43266	0.118831	10.4192	10.75	0.972766
eif3s10	-0.583982	9.15428	2.42257	0.119598	8.81247	9.36041	0.972766
rsl24d1	-0.431595	9.57136	2.42163	0.11967	9.15203	9.56317	0.972766
rnf213b	-1.09678	6.85014	2.41481	0.120192	6.64164	7.42455	0.972766
ndufb7	0.611522	8.85677	2.41407	0.120249	9.25192	8.6914	0.972766
nkx2.5	0.799603	7.5925	2.41009	0.120556	8.07516	7.42325	0.972766
rps25	-0.511747	10.432	2.40773	0.120737	10.3114	10.8152	0.972766
ndufs7	0.608824	8.26879	2.40735	0.120767	8.67909	8.142	0.972766
rnf213a	-1.28837	7.07965	2.40514	0.120937	6.64164	7.57904	0.972766
acvrl1	1.26051	6.68378	2.40084	0.12127	7.12827	6.33429	0.972766
f13a1a.1	3.14804	5.91113	2.39811	0.121482	5.90406	5.33493	0.972766
atf7ip	1.07442	7.13384	2.39181	0.121972	7.40806	6.65508	0.972766
sumo2b	1.26261	6.81915	2.385	0.122505	7.12968	6.33429	0.972766
hsbp1b	1.25797	6.78578	2.38374	0.122603	7.12747	6.33591	0.972766
ash1l	-1.09822	7.41612	2.36895	0.12377	6.64254	7.42705	0.972766
usf1	-3.15477	5.7182	2.36751	0.123885	5.31943	5.91892	0.972766
vegfab	1.26217	7.21027	2.36601	0.124004	7.13038	6.33591	0.972766
nit2	2.0754	5.91178	2.35168	0.125148	6.4926	5.65641	0.972766
clk4b	2.06789	6.08231	2.35062	0.125233	6.4926	5.65793	0.972766
csnk1da	-1.09221	7.13403	2.34374	0.125787	6.6433	7.42205	0.972766
ezh1	1.26094	6.71869	2.32751	0.127105	7.12827	6.33429	0.972766
nppa	-0.5595	10.863	2.32655	0.127183	10.9226	11.4793	0.972766
usp13	0.894906	7.66716	2.31829	0.127861	7.84307	7.14495	0.972766
tial1	-1.09693	7.08113	2.30608	0.128869	6.64103	7.42325	0.972766
pbxip1b	0.756402	7.73586	2.30428	0.129018	8.12852	7.50516	0.972766
csnk2b	-0.986821	7.18521	2.28571	0.13057	6.7797	7.50761	0.972766
srsf11	-0.861555	7.75322	2.28418	0.130699	7.22521	7.92052	0.972766
fxyd1	-0.404638	9.25089	2.28242	0.130847	9.17857	9.56498	0.972766
zgc:77849	0.837021	7.78785	2.28147	0.130928	7.90668	7.24387	0.972766
rps24	-0.315756	10.4954	2.27906	0.131131	10.4597	10.7727	0.972766
tfpi2	0.887331	7.34934	2.27043	0.131863	7.71302	7.03738	0.972766
mrpl24	1.69217	6.53674	2.26432	0.132384	6.78206	5.91892	0.972766
ulk1a	-1.35498	6.57492	2.26389	0.132421	6.12722	6.92123	0.972766
bbip1	-1.3551	6.57554	2.26322	0.132478	6.12803	6.92255	0.972766
sav1	1.2138	6.68274	2.26297	0.1325	7.32025	6.50364	0.972766
snx9b	1.49834	6.91337	2.26201	0.132582	7.02314	6.14536	0.972766
aars	-0.985755	7.25926	2.25659	0.133047	6.78132	7.50769	0.972766
rbpms2b	0.390034	9.58347	2.25221	0.133424	9.8109	9.44464	0.972766
tie-1as	2.91018	5.46679	2.24312	0.13421	5.81624	5.33493	0.972766
fgfr2	1.66631	6.49626	2.23742	0.134705	6.77896	5.92215	0.972766
pdcd10a	2.04806	6.18408	2.23541	0.134881	6.48918	5.65793	0.972766
hspa5	-0.984877	7.05438	2.2344	0.134969	6.7797	7.50397	0.972766
jpt1b	0.894554	7.27999	2.22593	0.135711	7.8424	7.14368	0.972766
cmc1	1.33224	6.7535	2.22115	0.136132	6.90563	6.1439	0.972766
rpl28	-0.524003	9.92325	2.22071	0.13617	9.72723	10.2331	0.972766
xiap	-1.35268	6.57482	2.2196	0.136268	6.12803	6.91978	0.972766
oaz2a	1.333	6.71906	2.21628	0.136562	6.90502	6.14223	0.972766
aldh2.2	-0.988928	7.22384	2.21253	0.136894	6.77896	7.50887	0.972766
gmpr	0.495827	9.01365	2.21184	0.136955	8.99311	8.54403	0.972766
myoz2b	0.630498	8.36147	2.2114	0.136994	8.64513	8.09314	0.972766
otub1b	1.33351	6.57479	2.20399	0.137654	6.90563	6.14223	0.972766
hmgb2b	-1.11036	6.71971	2.19382	0.138565	6.49089	7.24387	0.972766
gadd45ba	1.25569	6.91121	2.19139	0.138784	7.12677	6.33591	0.972766
nrp1b	-1.35366	6.49745	2.19103	0.138817	6.12904	6.92255	0.972766
smarce1	1.33198	6.99939	2.18411	0.139441	6.90418	6.14223	0.972766
xirp1	0.637881	8.88323	2.14691	0.142858	9.20538	8.6236	0.972766
tufm	0.886116	7.59454	2.13778	0.143709	7.71302	7.03868	0.972766
dctn2	-1.11163	6.78677	2.13594	0.143882	6.48995	7.24387	0.972766
fam50a	1.33163	6.41307	2.13563	0.143911	6.90418	6.14223	0.972766
ctnnal1	1.33057	6.37114	2.13329	0.144131	6.90563	6.14536	0.972766
tp53bp1	1.08908	6.81894	2.13101	0.144346	7.22816	6.5052	0.972766
tcf21	1.26688	6.4961	2.12812	0.144618	7.12887	6.33286	0.972766
serbp1a	-0.321902	10.3526	2.12509	0.144904	10.0737	10.3895	0.972766
psmb7	-1.35348	6.32559	2.12386	0.14502	6.12722	6.91978	0.972766
smtnl	0.884516	7.3268	2.11534	0.145829	7.71171	7.03868	0.972766
bcl2l1	1.08917	6.75276	2.11317	0.146036	7.22816	6.5052	0.972766
tbca	1.33145	6.32512	2.10959	0.146379	6.90418	6.14223	0.972766
gstp1	0.680984	8.04211	2.10919	0.146417	8.22864	7.65845	0.972766
mylk3	-0.758709	7.68469	2.1088	0.146454	7.40881	8.03709	0.972766
aplp2	-0.811354	7.64914	2.10838	0.146495	7.31881	7.9832	0.972766
ahcy	1.25609	6.61063	2.10806	0.146525	7.12596	6.33429	0.972766
ewsr1a	-1.35977	6.68452	2.10536	0.146784	6.12722	6.92387	0.972766
psmc6	1.26866	6.57509	2.10365	0.146948	7.13038	6.33429	0.972766
lgals2a	-0.80734	7.73755	2.1012	0.147184	7.32025	7.98103	0.972766
mrps9	1.3314	6.75223	2.10111	0.147192	6.90418	6.14223	0.972766
edc4	-2.066	6.0804	2.10039	0.147262	5.64123	6.50224	0.972766
rpsa	-0.212589	11.3289	2.09435	0.147845	11.1271	11.3396	0.972766
utp18	1.08717	6.71979	2.08293	0.148954	7.22816	6.50817	0.972766
eif3k	-0.704722	8.18699	2.08182	0.149063	7.64364	8.24667	0.972766
fbxl5	-1.36052	6.68603	2.07935	0.149304	6.12803	6.92532	0.972766
cd151	0.966619	7.08115	2.07644	0.149589	7.49094	6.79203	0.972766
aifm1	-0.7194	8.46901	2.07411	0.149818	8.02156	8.66144	0.972766
mylipa	0.960806	7.30419	2.07263	0.149963	7.48882	6.79633	0.972766
sh3bgr	0.821059	7.47649	2.05961	0.151249	7.78051	7.14368	0.972766
epdl1	0.960647	7.23359	2.05703	0.151506	7.48882	6.79633	0.972766
rpl37	-0.377948	9.94957	2.05197	0.15201	9.93475	10.3045	0.972766
col1a1b	0.566797	9.55594	2.05114	0.152093	10.1531	9.61481	0.972766
hnrnpaba	-0.63291	8.0933	2.048	0.152407	8.01973	8.58118	0.972766
pdia6	-1.48292	6.68434	2.04695	0.152511	5.90512	6.6566	0.972766
lgmn	-0.896562	7.10746	2.04617	0.152589	6.90563	7.58261	0.972766
pcbp2	0.586667	8.43621	2.04586	0.152621	8.71216	8.19421	0.972766
tmem59	-1.48494	6.41457	2.0441	0.152797	5.90512	6.65949	0.972766
sbno1	-1.48377	6.32657	2.04208	0.153001	5.90512	6.65797	0.972766
rab11ba	-1.48377	6.32715	2.042	0.153009	5.90512	6.65797	0.972766
rbfox1l	-1.48496	6.57619	2.04184	0.153025	5.90512	6.65949	0.972766
bcas2	-1.34858	6.49735	2.04098	0.153111	6.12904	6.91978	0.972766
tcp1	-0.593637	8.62112	2.03798	0.153413	8.31957	8.85967	0.972766
nbr1a	-1.48378	6.37096	2.03764	0.153448	5.90512	6.65797	0.972766
hexim1	-1.48531	6.45537	2.0361	0.153603	5.90406	6.65797	0.972766
fhl1a	0.322357	9.92048	2.03391	0.153824	10.2857	9.97703	0.972766
klf11a	-1.48677	6.41449	2.03011	0.154209	5.90406	6.65949	0.972766
cbx7a	-0.897654	7.23383	2.02969	0.154252	6.90502	7.58386	0.972766
notch1b	-0.786146	7.83572	2.02382	0.154849	7.22816	7.86073	0.972766
hspa4a	0.975611	7.55633	2.02274	0.154959	7.78247	7.03609	0.972766
zgc:56525	-1.4852	6.45633	2.021	0.155137	5.90512	6.65949	0.972766
smim4	-1.48379	6.45573	2.01788	0.155456	5.90512	6.65797	0.972766
rpl23	-0.343341	10.2857	2.01385	0.155869	10.2019	10.5404	0.972766
utp4	-1.4838	6.18442	2.00773	0.156499	5.90512	6.65797	0.972766
flii	-1.4838	6.68467	2.00623	0.156654	5.90512	6.65797	0.972766
sall1a	1.08459	6.6844	2.00055	0.157242	7.22668	6.50817	0.972766
hnrnpa0b	-0.846551	7.32692	1.9999	0.157309	7.12677	7.79716	0.972766
tnksb	1.46322	6.45584	1.99129	0.158207	6.64254	5.92041	0.972766
eppk1	-0.569099	8.34971	1.99054	0.158285	8.07691	8.58298	0.972766
rragd	-1.48381	6.3716	1.98944	0.1584	5.90512	6.65797	0.972766
arpc1a	0.548751	8.17211	1.98348	0.159025	8.67762	8.19521	0.972766
tbc1d15	1.46409	6.45637	1.97383	0.160042	6.6433	5.92041	0.972766
phb	0.694781	7.75391	1.97357	0.160069	8.07634	7.50761	0.972766
adma	-1.48382	6.41437	1.97165	0.160273	5.90512	6.65797	0.972766
higd2a	1.46416	6.37114	1.96691	0.160776	6.6433	5.92041	0.972766
tfg	1.46211	6.23294	1.96493	0.160987	6.64164	5.92041	0.972766
puf60b	1.46211	6.32659	1.96471	0.16101	6.64164	5.92041	0.972766
pank1a	1.33346	6.78629	1.96422	0.161062	6.90648	6.1439	0.972766
eif4a1a	1.46421	6.41409	1.96153	0.161349	6.6433	5.92041	0.972766
pak4	-1.48424	6.23449	1.96148	0.161355	5.90595	6.65949	0.972766
gpr146	1.46449	6.4141	1.96089	0.161419	6.64254	5.91892	0.972766
fblim1	1.46034	6.53607	1.96065	0.161444	6.64164	5.92215	0.972766
spoplb	-1.4843	6.23258	1.95957	0.161559	5.90406	6.6566	0.972766
uqcr10	0.494398	8.56348	1.95868	0.161654	8.99184	8.54585	0.972766
tsr1	1.46204	6.28038	1.95732	0.1618	6.64164	5.92041	0.972766
metrn	-1.48203	6.41389	1.95241	0.162327	5.90512	6.6566	0.972766
rnd3b	1.46132	6.28105	1.95171	0.162403	6.64254	5.92215	0.972766
patl1	1.46016	6.28074	1.95157	0.162417	6.64164	5.92215	0.972766
pgrmc1	1.46431	6.57486	1.95082	0.162498	6.6433	5.92041	0.972766
eno1a	-0.49704	10.3406	1.94812	0.162789	10.2242	10.7075	0.972766
stat4	1.46196	6.1842	1.94812	0.162789	6.64164	5.92041	0.972766
rps13	-0.456981	9.50026	1.94571	0.16305	9.4049	9.84306	0.972766
fbxo8	1.4623	6.23406	1.94404	0.16323	6.6433	5.92215	0.972766
lias	-1.48027	6.49662	1.94054	0.16361	5.90595	6.6566	0.972766
acaa2	0.873714	7.61292	1.93822	0.163861	7.56726	6.92123	0.972766
plekha5	1.46188	6.08084	1.93744	0.163947	6.64164	5.92041	0.972766
apc	-1.10486	6.91145	1.93724	0.163969	6.49089	7.24002	0.972766
zgc:86709	-1.65093	8.12952	1.93622	0.16408	6.90502	8.2316	0.972766
sphkap	1.3357	6.2813	1.93571	0.164135	6.90721	6.1439	0.972766
zgc:103670	0.883083	7.20847	1.92908	0.164859	7.71109	7.03738	0.972766
kansl3	1.45954	6.61225	1.92032	0.165821	6.64164	5.92215	0.972766
emc7	1.45951	6.13358	1.91867	0.166003	6.64164	5.92215	0.972766
castor2	-1.13312	6.96989	1.91863	0.166008	6.31956	7.03609	0.972766
nr2f6b	1.46169	6.28014	1.91523	0.166384	6.64164	5.92041	0.972766
serinc1	-0.714301	7.63171	1.91052	0.166905	7.49298	8.09001	0.972766
dek	-1.77539	6.32656	1.90711	0.167284	5.64123	6.33591	0.972766
ube2g2	-1.77542	6.28068	1.90376	0.167658	5.64123	6.33591	0.972766
ube2d1b	-1.77339	6.18434	1.89806	0.168296	5.64236	6.33591	0.972766
hif1al	-1.77548	6.0814	1.89677	0.168441	5.64123	6.33591	0.972766
atp6v0d1	1.46221	6.32529	1.89631	0.168491	6.64103	5.91892	0.972766
eif3c	-0.454163	9.613	1.896	0.168527	9.36246	9.79764	0.972766
sf3b3	-1.77335	6.23392	1.8931	0.168852	5.64236	6.33591	0.972766
rcc2	-1.77552	6.08129	1.89299	0.168866	5.64123	6.33591	0.972766
tex264a	-1.77335	6.02727	1.89293	0.168871	5.64236	6.33591	0.972766
timm50	-1.77335	6.02689	1.89283	0.168883	5.64236	6.33591	0.972766
vps45	-1.77335	6.08208	1.89261	0.168908	5.64236	6.33591	0.972766
gstr	0.777268	8.59458	1.89083	0.169108	8.84396	8.14924	0.972766
rpl38	-0.407075	9.57591	1.89051	0.169144	9.71281	10.1084	0.972766
ppp2ca	-1.77455	6.18528	1.89035	0.169162	5.64236	6.33734	0.972766
tbce	-1.77692	6.08167	1.88902	0.169313	5.64123	6.33734	0.972766
zgc:174888	-1.77693	6.08179	1.88874	0.169344	5.64123	6.33734	0.972766
rnf170	-1.77332	6.08173	1.88816	0.16941	5.64236	6.33591	0.972766
waslb	-1.77332	5.97068	1.88805	0.169422	5.64236	6.33591	0.972766
abhd16a	-1.77332	5.97073	1.888	0.169428	5.64236	6.33591	0.972766
nansa	-1.77332	6.0819	1.88788	0.169441	5.64236	6.33591	0.972766
gsdmeb	-1.77558	5.97005	1.88696	0.169546	5.64123	6.33591	0.972766
scaper	-1.77558	6.02683	1.88682	0.169561	5.64123	6.33591	0.972766
cacna1c	-0.981001	7.0265	1.88678	0.169565	6.64164	7.33392	0.972766
st6galnac5b	-1.77558	5.84959	1.88664	0.169581	5.64123	6.33591	0.972766
stk38a	-1.77558	5.84964	1.88659	0.169588	5.64123	6.33591	0.972766
pdgfrl	-1.13063	7.47687	1.88633	0.169616	6.32035	7.03338	0.972766
snx4	-1.77393	6.0262	1.88528	0.169735	5.64123	6.33429	0.972766
zgc:86598	-1.11502	6.85136	1.88516	0.169749	6.49089	7.24647	0.972766
si:ch211-173p18.3	-1.77461	6.18508	1.88469	0.169802	5.64236	6.33734	0.972766
dap1b	-1.7756	6.32638	1.88435	0.16984	5.64123	6.33591	0.972766
mxra8b	1.32634	6.75279	1.88417	0.169861	6.90418	6.1439	0.972766
pgd	-1.77711	5.97056	1.88256	0.170043	5.64123	6.33734	0.972766
ypel5	-1.77328	6.02707	1.88248	0.170052	5.64236	6.33591	0.972766
si:ch211-244o22.2	-1.77327	5.84998	1.88233	0.170069	5.64236	6.33591	0.972766
paip1	-1.77327	5.97061	1.8823	0.170073	5.64236	6.33591	0.972766
si:ch1073-291c23.2	0.968282	7.49589	1.88167	0.170145	7.64153	6.91846	0.972766
smim14	-1.77165	6.23366	1.88055	0.170272	5.64236	6.33429	0.972766
nfrkb	-1.77565	5.78537	1.87982	0.170355	5.64123	6.33591	0.972766
mpeg1.2	-1.77565	5.78542	1.87975	0.170363	5.64123	6.33591	0.972766
vdac1	-0.613864	8.31669	1.87962	0.170377	7.845	8.37973	0.972766
ndufa4	0.366182	10.1717	1.87872	0.17048	10.2407	9.89225	0.972766
pi4kb	-1.77387	5.91055	1.87859	0.170495	5.64123	6.33429	0.972766
uspl1	-1.77469	5.97076	1.87789	0.170575	5.64236	6.33734	0.972766
socs3b	-1.77469	5.97076	1.87789	0.170575	5.64236	6.33734	0.972766
fabp11a	-0.897227	8.44699	1.87731	0.17064	7.84433	8.62803	0.972766
fam162a	0.817787	7.34915	1.87669	0.170711	7.77983	7.14633	0.972766
golga7	-1.77323	6.53684	1.87597	0.170793	5.64236	6.33591	0.972766
lyar	-1.77569	6.0808	1.87561	0.170834	5.64123	6.33591	0.972766
slc6a8	-1.77152	6.28062	1.87533	0.170866	5.64236	6.33429	0.972766
klhl12	-1.77322	5.78589	1.87525	0.170875	5.64236	6.33591	0.972766
ryr1b	-0.983339	6.94213	1.87504	0.170898	6.78132	7.50642	0.972766
neil1	-1.77474	5.85031	1.87362	0.171061	5.64236	6.33734	0.972766
ube2q1	-1.77572	6.08146	1.87255	0.171184	5.64123	6.33591	0.972766
rmnd1	-1.77572	5.96993	1.87224	0.171219	5.64123	6.33591	0.972766
cish	-1.77573	5.84971	1.87178	0.171272	5.64123	6.33591	0.972766
mical2b	-0.980927	6.81904	1.87173	0.171277	6.6433	7.33637	0.972766
klhdc2	-1.7738	5.91099	1.87034	0.171436	5.64123	6.33429	0.972766
mrpl37	0.959247	6.91177	1.86991	0.171486	7.32025	6.65797	0.972766
deptor	-1.77575	5.91132	1.86967	0.171513	5.64123	6.33591	0.972766
phactr4b	-1.77479	5.8505	1.86907	0.171581	5.64236	6.33734	0.972766
add3a	-0.736332	7.5573	1.86874	0.171619	7.32169	7.92267	0.972766
g0s2	2.07901	6.32614	1.86805	0.171698	6.49166	5.65641	0.972766
ripor3	-1.77376	5.84938	1.86609	0.171924	5.64123	6.33429	0.972766
nup50	-1.77128	6.02681	1.86595	0.17194	5.64236	6.33429	0.972766
gig2o	-1.77127	5.8497	1.86548	0.171993	5.64236	6.33429	0.972766
dhcr7	-1.77484	5.78622	1.86395	0.17217	5.64236	6.33734	0.972766
zc3h11a	0.960466	6.78577	1.86196	0.172399	7.32092	6.6566	0.972766
rap1b	0.657742	7.62994	1.86185	0.172411	8.12791	7.58386	0.972766
bckdk	0.829866	7.45657	1.86165	0.172435	7.90479	7.24647	0.972766
calcoco2	-1.77372	6.08108	1.86142	0.172461	5.64123	6.33429	0.972766
dennd4a	-1.77371	5.78491	1.86022	0.172599	5.64123	6.33429	0.972766
gnmt	-1.77371	5.91092	1.86017	0.172605	5.64123	6.33429	0.972766
si:dkey-13i19.8	0.87548	7.08223	1.85946	0.172687	7.56926	6.92123	0.972766
zgc:113054	-1.7749	5.91185	1.85905	0.172735	5.64236	6.33734	0.972766
tspan36	-1.35692	6.75195	1.85815	0.172838	6.12621	6.91978	0.972766
mrpl33	1.46476	6.32777	1.8545	0.173261	6.6442	5.92191	0.972766
cyr61	1.75538	6.18451	1.85412	0.173305	6.32035	5.65641	0.972766
sh2d3cb	1.75538	6.13346	1.85406	0.173312	6.32035	5.65641	0.972766
cyb5r3	-1.1299	6.64873	1.85235	0.173511	6.32132	7.03468	0.972766
pdp1	-1.77364	6.08138	1.8521	0.173539	5.64123	6.33429	0.972766
scarb2a	1.75598	6.28052	1.85179	0.173575	6.31974	5.65612	0.972766
med19a	1.75542	6.2332	1.851	0.173668	6.32035	5.65641	0.972766
si:dkey-110k5.6	1.75543	6.08074	1.85043	0.173733	6.32035	5.65641	0.972766
crnkl1	-1.77594	6.28075	1.84983	0.173803	5.64123	6.33591	0.972766
katnb1	1.46201	6.13273	1.8496	0.17383	6.64103	5.91892	0.972766
sid4	1.75449	6.3708	1.84918	0.173878	6.31956	5.65641	0.972766
rnft1	-1.77595	5.78542	1.84907	0.173892	5.64123	6.33591	0.972766
hsp90b1	-0.826603	7.45616	1.84891	0.17391	7.01935	7.65967	0.972766
ythdc1	-1.77301	6.28081	1.84805	0.174011	5.64236	6.33591	0.972766
si:ch73-111k22.2	1.75333	6.41437	1.84704	0.174128	6.31956	5.65793	0.972766
tecrb	1.75548	5.91082	1.84592	0.174259	6.32035	5.65641	0.972766
rab5if	1.75548	5.91094	1.84587	0.174265	6.32035	5.65641	0.972766
zgc:55558	1.75447	6.13332	1.84503	0.174363	6.31956	5.65641	0.972766
si:ch73-55i23.1	-1.19002	7.43485	1.84402	0.174481	6.64254	7.50278	0.972766
ncoa5	1.75324	6.32613	1.8435	0.174541	6.31956	5.65793	0.972766
hyou1	-1.77072	5.78543	1.8434	0.174553	5.64236	6.33429	0.972766
hddc2	1.75699	6.02695	1.8433	0.174565	6.32132	5.65641	0.972766
fut8a	1.75699	6.18477	1.84329	0.174565	6.32132	5.65641	0.972766
slkb	1.7542	5.97019	1.84326	0.174569	6.32035	5.65793	0.972766
srsf2b	-1.77354	5.71783	1.84049	0.174893	5.64123	6.33429	0.972766
dvl3a	1.75554	5.97003	1.84047	0.174896	6.32035	5.65641	0.972766
sco1	1.75559	6.02734	1.84032	0.174914	6.32132	5.65793	0.972766
suds3	1.75444	5.96959	1.84011	0.174938	6.31956	5.65641	0.972766
klf3	1.75444	6.08089	1.83988	0.174966	6.31956	5.65641	0.972766
dlg5a	1.75444	6.02644	1.8398	0.174974	6.31956	5.65641	0.972766
tmem147	-1.77352	6.13391	1.83844	0.175134	5.64123	6.33429	0.972766
nudcd2	1.75415	6.02684	1.83771	0.17522	6.32035	5.65793	0.972766
sult1st6	1.75414	5.84985	1.83744	0.175252	6.32035	5.65793	0.972766
homeza	1.75557	5.78524	1.83723	0.175276	6.32035	5.65641	0.972766
tpp1	1.75716	5.97006	1.83716	0.175284	6.32132	5.65641	0.972766
ston1	1.75443	6.02656	1.83692	0.175312	6.31956	5.65641	0.972766
cog3	1.75717	6.13425	1.8369	0.175315	6.32132	5.65641	0.972766
rps6kb1b	1.75718	6.08172	1.8366	0.175349	6.32132	5.65641	0.972766
klf11b	1.11115	6.78665	1.8363	0.175385	7.0216	6.33591	0.972766
gtf2e2	1.75441	5.91068	1.83374	0.175686	6.31956	5.65641	0.972766
hhatla	1.75441	5.91049	1.83374	0.175686	6.31956	5.65641	0.972766
glod4	1.75563	5.91185	1.83364	0.175698	6.32132	5.65793	0.972766
basp1	1.75441	5.96946	1.83361	0.175702	6.31956	5.65641	0.972766
zer1	1.75441	5.96978	1.83359	0.175704	6.31956	5.65641	0.972766
itgav	1.09208	6.68243	1.83257	0.175824	7.22668	6.50224	0.972766
etv4	1.7573	6.28081	1.83229	0.175858	6.32132	5.65641	0.972766
cebpz	1.46784	6.0818	1.8321	0.175879	6.6442	5.92041	0.972766
spred2b	1.75565	5.91081	1.83093	0.176018	6.32035	5.65641	0.972766
rnf144ab	1.75292	5.91113	1.83048	0.17607	6.31956	5.65793	0.972766
pik3ip1	0.715136	7.92779	1.83013	0.176112	8.17887	7.58502	0.972766
osbpl2b	1.7574	5.84992	1.82889	0.176259	6.32132	5.65641	0.972766
msra	-1.77343	5.84901	1.82646	0.176547	5.64123	6.33429	0.972766
zgc:153012	1.75438	5.96954	1.82633	0.176562	6.31956	5.65641	0.972766
tpst1	1.75438	5.96954	1.82633	0.176562	6.31956	5.65641	0.972766
krit1	1.75568	6.02711	1.82604	0.176596	6.32132	5.65793	0.972766
si:ch211-216l23.2	1.75568	6.02746	1.82557	0.176651	6.32132	5.65793	0.972766
gpn2	1.75568	5.85019	1.82527	0.176687	6.32132	5.65793	0.972766
eif4e2rs1	1.75568	5.85024	1.82519	0.176697	6.32132	5.65793	0.972766
pcm1	1.11052	6.53584	1.8249	0.176731	7.02088	6.33591	0.972766
ankrd13c	-1.77621	6.02668	1.82242	0.177026	5.64123	6.33591	0.972766
shrprbck1r	1.75271	5.84959	1.82217	0.177055	6.31956	5.65793	0.972766
popdc3	-1.77836	6.02773	1.82028	0.17728	5.64236	6.33895	0.972766
aplnra	1.75577	5.9107	1.82021	0.177288	6.32035	5.65641	0.972766
sub1a	1.11051	6.68418	1.82014	0.177297	7.02088	6.33591	0.972766
dnajc7	1.25455	6.81849	1.81844	0.1775	7.12827	6.33734	0.972766
zgc:86609	-1.76787	5.96965	1.81743	0.177619	5.64236	6.33286	0.972766
cbx6a	1.75433	5.7851	1.81598	0.177793	6.31956	5.65641	0.972766
psmc5	-0.996104	7.37124	1.81427	0.177997	6.77735	7.50761	0.972766
hsp90aa1.1	-0.714511	10.2804	1.81373	0.178062	9.73159	10.4259	0.972766
eif4ebp3	-1.77539	5.85042	1.81187	0.178284	5.64236	6.33734	0.972766
klhl40a	1.75246	5.91125	1.81181	0.178292	6.31956	5.65793	0.972766
svila	0.656449	7.8813	1.81172	0.178302	8.1268	7.58502	0.972766
lnx2b	1.7543	5.78498	1.8107	0.178425	6.31956	5.65641	0.972766
selenon	1.75796	6.02701	1.80903	0.178625	6.32132	5.65641	0.972766
gnsb	1.75799	5.78563	1.80789	0.178761	6.32132	5.65641	0.972766
stk17al	1.75748	6.18571	1.80786	0.178765	6.32211	5.65793	0.972766
brk1	-1.13195	6.53556	1.80775	0.178778	6.31956	7.03468	0.972766
rps27.1	-0.329872	10.0537	1.8072	0.178844	9.79731	10.1199	0.972766
emc10	1.75231	6.23332	1.80572	0.179022	6.31956	5.65793	0.972766
qsox1	1.75381	5.78583	1.80427	0.179197	6.32035	5.65793	0.972766
fhl2b	-1.47446	6.57317	1.80323	0.179322	5.90512	6.6537	0.972766
ston2	-1.76969	6.41454	1.80177	0.179499	5.64236	6.33429	0.972766
lysmd2	1.75822	5.85004	1.79996	0.179717	6.32132	5.65641	0.972766
nadk2	1.75377	6.02714	1.79959	0.179762	6.32035	5.65793	0.972766
hsp90ab1	-0.241985	12.1767	1.79837	0.179909	11.9424	12.1858	0.972766
zgc:63470	1.75372	5.85017	1.79533	0.180278	6.32035	5.65793	0.972766
utp6	-1.77556	5.9124	1.79459	0.180368	5.64236	6.33734	0.972766
atad3	1.75371	5.91104	1.79425	0.180409	6.32035	5.65793	0.972766
exoc3	1.75423	5.96942	1.79288	0.180576	6.31956	5.65641	0.972766
rad23aa	-1.48773	6.23458	1.79138	0.180758	5.90595	6.66087	0.972766
sdad1	-0.986112	7.10842	1.79128	0.18077	6.64103	7.33769	0.972766
sccpdhb	1.75587	5.9704	1.79035	0.180883	6.32132	5.65793	0.972766
polr2eb	1.75587	5.97069	1.79029	0.180891	6.32132	5.65793	0.972766
bambib	1.75853	5.78571	1.78881	0.181071	6.32132	5.65641	0.972766
sumf1	-1.76934	5.78531	1.7873	0.181256	5.64236	6.33429	0.972766
lsm8	1.75181	5.84959	1.78553	0.181472	6.31956	5.65793	0.972766
rpl4	-0.154664	11.7901	1.78348	0.181723	11.6826	11.8387	0.972766
emilin1b	1.75418	5.71777	1.78048	0.182091	6.31956	5.65641	0.972766
fh	0.318493	9.98902	1.77919	0.182248	10.1934	9.88965	0.972766
ubap2b	0.624442	7.89713	1.77822	0.182368	8.17887	7.65845	0.972766
dynll1	-1.13187	6.68356	1.77803	0.182392	6.31956	7.03468	0.972766
idh2	0.180139	12.3126	1.77772	0.18243	12.4326	12.2586	0.972766
kmt5b	1.75816	6.08255	1.77581	0.182665	6.32211	5.65793	0.972766
rps26	-0.510797	8.82816	1.77566	0.182683	8.64371	9.11873	0.972766
nrp2a	1.75155	5.71817	1.77499	0.182765	6.31956	5.65793	0.972766
mtmr12	-1.77302	5.78516	1.77457	0.182817	5.64123	6.33429	0.972766
sgk1	1.45837	5.96927	1.77343	0.182959	6.64103	5.92041	0.972766
atf5a	1.75415	6.0265	1.77222	0.183107	6.31956	5.65641	0.972766
rab20	1.74927	6.02614	1.77196	0.18314	6.31859	5.65793	0.972766
histh1l	-0.8805	7.21016	1.77072	0.183293	6.78045	7.42325	0.972766
notch3	1.10917	6.64938	1.77072	0.183294	7.02088	6.33734	0.972766
psma4	1.10916	6.53615	1.77019	0.183359	7.02088	6.33734	0.972766
dldh	-0.376027	9.24824	1.76921	0.18348	9.12912	9.48901	0.972766
ralbp1	-1.77298	5.78491	1.7685	0.183568	5.64123	6.33429	0.972766
plxnb2a	1.1124	6.7865	1.76754	0.183687	7.02231	6.33591	0.972766
kpna4	-0.986856	6.94256	1.7652	0.183977	6.64254	7.34024	0.972766
rrbp1b	1.4543	5.96978	1.76348	0.184191	6.64103	5.92215	0.972766
mob2a	1.762	5.91178	1.76016	0.184605	6.32211	5.65641	0.972766
cct6a	-0.362467	9.81602	1.759	0.184749	9.5867	9.93883	0.972766
ppap2d	1.11034	6.41385	1.75896	0.184755	7.02088	6.33591	0.972766
mef2d	1.75102	6.13411	1.7535	0.185437	6.31956	5.65793	0.972766
ing5a	1.75329	5.85005	1.75324	0.185471	6.32035	5.65793	0.972766
ptges3a	0.963923	6.84963	1.75127	0.185718	7.32169	6.65508	0.972766
fam160b1	-1.77693	5.84947	1.7504	0.185827	5.64123	6.33591	0.972766
hsf2	-1.13209	6.49605	1.74817	0.186107	6.32035	7.03609	0.972766
spega	-0.881137	7.13492	1.7456	0.18643	6.78045	7.42455	0.972766
trim24	1.75665	5.78531	1.74382	0.186655	6.32035	5.65641	0.972766
fabp3	0.322226	10.4466	1.7415	0.186948	10.7896	10.48	0.972766
jph1a	-0.879738	6.97052	1.7377	0.18743	6.78045	7.42205	0.972766
snap23.1	1.10968	6.81748	1.73769	0.187432	7.01935	6.33429	0.972766
helz	-0.879611	7.08195	1.73569	0.187686	6.78132	7.42325	0.972766
pdhx	0.6244	7.6658	1.73235	0.188111	8.17887	7.65845	0.972766
nrp2b	1.75047	6.18458	1.73075	0.188315	6.31956	5.65793	0.972766
slc39a9	1.75042	5.71817	1.72882	0.188561	6.31956	5.65793	0.972766
apobec2b	-1.71726	6.44099	1.72329	0.18927	5.64123	6.3057	0.972766
rpl29	-0.414052	9.27505	1.72314	0.18929	9.15245	9.54776	0.972766
hint1	0.802828	6.91155	1.72246	0.189377	7.64364	7.03609	0.972766
fbxo3	-1.76855	5.91047	1.71495	0.190345	5.64123	6.33286	0.972766
lsm12b	-0.826936	7.15912	1.71404	0.190462	7.01935	7.65845	0.972766
atp5meb	0.408986	9.43355	1.71382	0.19049	9.84617	9.46063	0.972766
bmp1a	-1.77259	6.37104	1.71026	0.190952	5.64123	6.33429	0.972766
srp54	-0.881884	7.02734	1.70894	0.191123	6.7797	7.42455	0.972766
zgc:136308	2.56931	5.51537	1.70323	0.191866	5.71041	5.33493	0.972766
dusp6	0.740998	7.57503	1.69482	0.192967	8.02276	7.42205	0.972766
acads	-0.851027	7.4979	1.69068	0.193512	7.12747	7.79944	0.972766
phyh	0.963436	7.08079	1.68879	0.193761	7.32092	6.65508	0.972766
nucb2a	0.671645	7.77038	1.68666	0.194042	7.96591	7.42205	0.972766
rbm12b	1.76546	5.91166	1.68065	0.194838	6.32211	5.65641	0.972766
si:dkey-67c22.2	-0.879164	6.99951	1.67931	0.195016	6.78132	7.42325	0.972766
irf2bp2b	0.894519	7.61087	1.67118	0.1961	7.96166	7.24387	0.972766
zgc:65997	0.858673	7.16005	1.67104	0.19612	7.40881	6.79633	0.972766
selenow1	0.379307	9.18398	1.66501	0.196928	9.54836	9.19712	0.972766
impa2	-1.37184	6.94356	1.66235	0.197286	6.12722	6.92532	0.972766
ppp2r1ba	-1.27114	7.0007	1.66193	0.197343	6.32211	7.14368	0.972766
tcp11l2	-1.29476	7.08447	1.66148	0.197404	6.32035	7.14761	0.972766
znf326	-1.78974	6.72082	1.65958	0.19766	5.64123	6.33895	0.972766
gspt1l	0.59413	7.97193	1.65303	0.198548	8.22864	7.73062	0.972766
tmem263	1.76668	6.08186	1.65193	0.198697	6.32211	5.65641	0.972766
rpl14	-0.407887	10.7197	1.64873	0.199132	10.4796	10.8801	0.972766
afap1l1b	1.74965	5.71737	1.64682	0.199392	6.31859	5.65641	0.972766
anxa6	0.569733	8.08198	1.6455	0.199573	8.41027	7.92052	0.972766
fgfr1op2	-0.976593	6.71875	1.64256	0.199975	6.48995	7.14368	0.972766
sik3	-1.12679	7.10926	1.64223	0.20002	6.32132	7.03468	0.972766
zgc:91910	-0.878822	7.1071	1.63949	0.200395	6.7797	7.42084	0.972766
mrpl38	1.45278	6.78528	1.63762	0.200652	6.64012	5.92041	0.972766
ppp6r3	-0.975869	6.64816	1.62856	0.201902	6.48995	7.14241	0.972766
cdc42bpab	1.74935	5.84861	1.6274	0.202064	6.31859	5.65641	0.972766
otud6b	-1.79139	5.97094	1.6219	0.202827	5.64123	6.33895	0.972766
arih1	1.75375	6.28	1.6134	0.204015	6.31956	5.65641	0.972766
eef1db	-0.527721	8.67649	1.61267	0.204117	8.60548	9.09409	0.972766
slc25a12	0.566676	7.99862	1.60894	0.204641	8.2746	7.79605	0.972766
sult2st1	0.667775	7.49645	1.60831	0.204729	7.96341	7.42575	0.972766
clstn1	-1.16792	6.61204	1.60805	0.204766	6.12722	6.79485	0.972766
celf1	0.857091	6.75265	1.60316	0.205456	7.40739	6.79633	0.972766
lims1	-1.16898	6.49671	1.60234	0.205571	6.12722	6.79633	0.972766
dcp2	-1.16824	6.75361	1.59958	0.205962	6.12803	6.79633	0.972766
hyal1	1.76131	5.71924	1.59704	0.206324	6.32211	5.65793	0.972766
alcama	-0.974614	6.71877	1.59	0.207327	6.49089	7.14241	0.972766
trnau1apb	-1.16611	6.68417	1.58434	0.208137	6.12803	6.79351	0.972766
map2k1	-1.50818	6.3723	1.58105	0.208609	5.90406	6.66225	0.972766
ppp3r1a	-1.75847	5.78504	1.5774	0.209135	5.64236	6.33286	0.972766
tspan7	-1.16941	6.64771	1.57319	0.209745	6.12621	6.79485	0.972766
LOC795545	-0.310949	11.1304	1.57127	0.210022	11.0134	11.3223	0.972766
tktb	0.96058	7.02819	1.56833	0.21045	7.32228	6.65949	0.972766
blvrb	-1.16579	6.75298	1.56723	0.210609	6.12803	6.79351	0.972766
cmtr1	-1.17069	6.28107	1.56695	0.210651	6.12722	6.79768	0.972766
pdcd4a	0.953845	6.64885	1.55942	0.21175	7.12827	6.50661	0.972766
myl7	0.146937	15.3446	1.55916	0.211788	15.5027	15.3594	0.972766
wwc3	-1.16956	6.32617	1.55777	0.211992	6.12621	6.79485	0.972766
slc38a4	-1.17093	6.3719	1.55605	0.212245	6.12722	6.79768	0.972766
asb10	-1.16553	6.37092	1.5531	0.212678	6.12803	6.79351	0.972766
nedd9	-1.1697	6.23432	1.55222	0.212809	6.12803	6.79768	0.972766
smtnl1	-1.46772	6.32642	1.55008	0.213124	5.90595	6.65508	0.972766
nedd8	-1.1683	6.3715	1.5485	0.213357	6.12803	6.79633	0.972766
ndufb4	0.686238	7.76903	1.5443	0.213979	7.77922	7.24262	0.972766
vapa	-1.16786	6.49723	1.5402	0.214588	6.12823	6.79633	0.972766
kdm5c	0.954366	6.64886	1.53692	0.215077	7.12887	6.50661	0.972766
zgc:158564	-0.834204	7.59497	1.53657	0.215129	7.01935	7.66197	0.972766
kdrl	-0.8003	7.51729	1.53634	0.215163	6.90502	7.50642	0.972766
adam10a	0.675105	7.73571	1.53242	0.215749	7.96591	7.41955	0.972766
myh6	-1.59445	9.26153	1.5317	0.215857	8.37021	9.88657	0.972766
zswim8	1.14722	6.64983	1.52974	0.216152	6.78132	6.1439	0.972766
tmem30ab	1.1477	6.32614	1.5278	0.216443	6.78045	6.14223	0.972766
cpa5	1.77176	5.78596	1.52711	0.216547	6.32211	5.65641	0.972766
atp5fa1	0.167785	11.89	1.52478	0.216897	11.9504	11.7889	0.972766
zgc:194398	1.14686	6.13332	1.52343	0.217101	6.7797	6.14223	0.972766
ndrg4	0.256053	10.1481	1.51973	0.21766	10.1789	9.93731	0.972766
plxnd1	0.952371	7.10854	1.51687	0.218094	7.12827	6.50817	0.972766
ndufs8a	0.451028	8.94176	1.51679	0.218106	9.17774	8.7661	0.972766
ifngr2	1.14596	6.41333	1.51653	0.218145	6.77896	6.14223	0.972766
hmox2a	1.14595	6.4128	1.51575	0.218263	6.77896	6.14223	0.972766
fstl1b	1.14688	6.41403	1.51389	0.218546	6.7797	6.14223	0.972766
glrx5	0.687085	7.28016	1.51328	0.21864	7.77983	7.24137	0.972766
ebna1bp2	1.14688	6.18401	1.51327	0.218641	6.7797	6.14223	0.972766
sdhaf2	0.951855	6.6841	1.51186	0.218856	7.12677	6.50661	0.972766
eef1da	-0.52159	9.55774	1.51117	0.218961	9.44747	9.94392	0.972766
mpc2	0.804587	7.70343	1.51048	0.219066	8.07809	7.42455	0.972766
cox7a1	0.356301	9.04914	1.50316	0.220185	9.3665	9.03816	0.972766
akirin1	1.1469	6.13332	1.50133	0.220467	6.7797	6.14223	0.972766
id2b	-0.978864	6.61317	1.49623	0.221253	6.49089	7.14633	0.972766
jam3b	0.688191	7.43521	1.49533	0.221391	7.78179	7.24262	0.972766
prickle2b	-0.982201	6.64844	1.49504	0.221436	6.48841	7.14495	0.972766
riok2	0.871486	7.18396	1.48928	0.222329	7.56654	6.91978	0.972766
mob1a	1.1498	6.41328	1.48809	0.222513	6.78045	6.14077	0.972766
cav3	-1.16798	6.45553	1.48795	0.222535	6.12722	6.79485	0.972766
pcca	0.778129	7.51731	1.48794	0.222536	7.49094	6.91978	0.972766
slc25a3b	0.247043	10.3042	1.48575	0.222876	10.5501	10.3145	0.972766
lamp2	-0.732426	7.57535	1.4801	0.22376	7.0216	7.58502	0.972766
sh3gl1b	-1.47343	6.1325	1.47898	0.223934	5.90406	6.6537	0.972766
aldoab	0.297099	10.7206	1.47785	0.224111	10.8151	10.5304	0.972766
angptl2b	1.14487	6.28055	1.47546	0.224486	6.7797	6.1439	0.972766
snx5	1.26955	6.53474	1.47514	0.224537	7.12747	6.33286	0.972766
yy1b	1.14829	6.41377	1.47442	0.224649	6.78045	6.14223	0.972766
mlf2	1.14872	6.18327	1.47346	0.224801	6.7797	6.14077	0.972766
pygb	0.778844	6.94109	1.47149	0.225111	7.49159	6.91978	0.972766
ccdc187	-1.16799	6.91205	1.47088	0.225206	6.12722	6.79485	0.972766
mxra8a	1.14737	6.23211	1.46921	0.22547	6.77896	6.14077	0.972766
vps26c	1.14355	6.41408	1.46835	0.225606	6.77896	6.1439	0.972766
prpf8	-0.731424	7.47703	1.46591	0.225992	7.0216	7.58261	0.972766
hspa4b	1.06351	7.02699	1.46566	0.226032	7.40739	6.65949	0.972766
tm9sf2	0.853956	6.81894	1.46516	0.226111	7.40806	6.79903	0.972766
serpinf1	-1.1658	6.61099	1.46352	0.22637	6.12722	6.79351	0.972766
phb2a	1.14433	6.4142	1.46102	0.226767	6.78045	6.14536	0.972766
lgals9l3	-1.17625	6.32651	1.44928	0.228644	6.12621	6.79768	0.972766
metap2b	0.722983	8.04226	1.44764	0.228907	7.90793	7.3326	0.972766
dynlrb1	1.14457	6.4144	1.44546	0.229257	6.7797	6.1439	0.972766
fam107b	0.519558	7.95478	1.44192	0.229829	8.36481	7.91939	0.972766
ogdha	-0.393929	9.31869	1.43945	0.230229	8.8748	9.2481	0.972766
ppifb	1.32024	6.64808	1.43676	0.230665	6.90418	6.1439	0.972766
txnrd3	-0.85867	7.08278	1.42124	0.2332	6.6433	7.24387	0.972766
zgc:65811	-0.624406	7.37063	1.40921	0.235187	7.40739	7.92267	0.972766
mbnl1	-1.16809	6.18536	1.40804	0.235383	6.12904	6.79768	0.972766
rpl27a	-0.412366	8.62052	1.40565	0.235779	8.56816	8.94811	0.972766
caprin1b	-0.374223	9.60926	1.40302	0.236219	9.04652	9.40216	0.972766
adh8a	0.944559	7.3717	1.40257	0.236294	7.64027	6.92532	0.972766
kazald3	1.14778	6.18331	1.40139	0.236491	6.77896	6.14077	0.972766
mybphb	-1.12368	6.85062	1.39805	0.237051	6.32035	7.03338	0.972766
fubp1	-0.703854	7.55453	1.39598	0.237397	7.22816	7.79148	0.972766
rpl39	-0.324078	9.63586	1.39566	0.237452	9.44962	9.76282	0.972766
psmc1a	1.14219	6.61207	1.39417	0.237702	6.77896	6.1439	0.972766
acsl1a	0.95395	6.8514	1.39209	0.238052	7.12968	6.50817	0.972766
si:dkey-23c22.6	-2.32156	6.28105	1.38888	0.238594	5.31943	5.65793	0.972766
iqgap2	-2.32158	6.02725	1.38862	0.238638	5.31943	5.65793	0.972766
stk35	-2.32292	5.41365	1.38802	0.23874	5.31943	5.65822	0.972766
si:dkey-33i11.3	-2.32292	5.41365	1.38802	0.23874	5.31943	5.65822	0.972766
LOC107988034	-2.32292	5.41365	1.38802	0.23874	5.31943	5.65822	0.972766
glrx2	-2.32168	5.78597	1.38761	0.238809	5.31943	5.65793	0.972766
ppardb	-2.32168	5.8502	1.38761	0.23881	5.31943	5.65793	0.972766
ywhabl	-0.483977	8.28177	1.38742	0.238841	8.07572	8.50767	0.972766
stk11	-2.3217	6.08189	1.38735	0.238854	5.31943	5.65793	0.972766
sema6e	-2.32172	5.71884	1.38715	0.238887	5.31943	5.65793	0.972766
lyrm9	-2.32172	5.71889	1.38714	0.238888	5.31943	5.65793	0.972766
pkib	-2.32173	5.85043	1.3871	0.238896	5.31943	5.65793	0.972766
inpp4ab	-2.32173	6.08183	1.38706	0.238902	5.31943	5.65793	0.972766
lats2	-2.32018	6.28137	1.38699	0.238915	5.31943	5.65641	0.972766
rad23ab	-2.32176	5.78585	1.38674	0.238957	5.31943	5.65793	0.972766
foxn2b	-2.32176	5.85012	1.38672	0.23896	5.31943	5.65793	0.972766
pdlim2	-2.32177	5.57425	1.38664	0.238973	5.31943	5.65793	0.972766
sinhcafl	-2.32177	5.57417	1.38664	0.238973	5.31943	5.65793	0.972766
zgc:153521	-2.32177	5.57425	1.38664	0.238973	5.31943	5.65793	0.972766
stk38l	-2.32177	5.57425	1.38664	0.238973	5.31943	5.65793	0.972766
ncstn	-2.32177	5.57425	1.38664	0.238973	5.31943	5.65793	0.972766
gli3	-2.32177	5.57425	1.38664	0.238973	5.31943	5.65793	0.972766
parla	-2.32177	5.64823	1.38664	0.238973	5.31943	5.65793	0.972766
zgc:163143	-2.32177	5.57417	1.38664	0.238973	5.31943	5.65793	0.972766
tmem106c	-2.32177	5.57425	1.38664	0.238973	5.31943	5.65793	0.972766
ccm2	-2.32177	5.57425	1.38664	0.238973	5.31943	5.65793	0.972766
stat5a	-2.32177	5.64828	1.38664	0.238973	5.31943	5.65793	0.972766
bmpr1ab	-2.32177	5.5743	1.38664	0.238973	5.31943	5.65793	0.972766
nuf2	-2.32177	5.57425	1.38664	0.238973	5.31943	5.65793	0.972766
cyp2u1	-2.32177	5.57417	1.38664	0.238973	5.31943	5.65793	0.972766
cybc1	-2.32177	5.57425	1.38664	0.238973	5.31943	5.65793	0.972766
ift80	-2.32177	5.5743	1.38664	0.238973	5.31943	5.65793	0.972766
timm10b	-2.32177	5.57417	1.38664	0.238973	5.31943	5.65793	0.972766
LOC571912	-2.32177	5.5743	1.38664	0.238973	5.31943	5.65793	0.972766
gemin2	-2.32177	5.57425	1.38664	0.238973	5.31943	5.65793	0.972766
rnf144aa	-2.32177	5.5743	1.38664	0.238973	5.31943	5.65793	0.972766
[truncated: 8,001 more rows]

## Sheet: WT vs nrf2 mutant
	logFC	logCPM	LR	PValue	Test_logCPM	control_logCPM	FDR
hbaa1	1.18793	12.71	190.812	2.11374e-43	13.7205	12.6158	3.20548e-39
ba1l	1.64116	11.796	165.933	5.72112e-38	12.9204	11.3643	4.33804e-34
si:ch211-5k11.8	1.14041	12.0382	132.512	1.15587e-30	12.927	11.8526	5.84291e-27
mhc1uba	-9.11227	9.46028	84.8559	3.20924e-20	5.27993	10.4905	1.2167e-16
hbba1	1.22419	13.2654	68.8056	1.08663e-16	14.2407	13.1038	3.29574e-13
actn2b	0.900031	12.9631	59.922	9.86929e-15	13.353	12.538	2.49446e-11
zgc:152791	-4.07132	8.85167	48.8448	2.77046e-12	6.45082	9.88231	6.002e-09
ak1	0.864859	11.8767	46.9126	7.42237e-12	12.2703	11.5004	1.407e-08
zgc:123068	-3.75598	8.33884	46.6757	8.37625e-12	6.28083	9.29669	1.4114e-08
eef1a1l2	0.997488	11.5697	39.3491	3.54423e-10	12.2311	11.3242	5.37482e-07
ldhba	-1.17864	11.4146	35.6359	2.37865e-09	10.4615	11.7009	3.27929e-06
atp2a2a	0.49454	12.4434	32.8781	9.812e-09	12.6867	12.2776	1.23999e-05
mdh2	0.522353	12.1592	26.8056	2.2498e-07	12.3287	11.8938	0.000262448
tnnc1a	0.609185	12.0103	23.6484	1.15645e-06	11.8852	11.3635	0.00125268
hbba2	2.11589	9.00729	22.563	2.03359e-06	10.304	8.41007	0.00205595
acta1b	-0.46527	12.655	20.4842	6.01248e-06	11.9751	12.5171	0.0056987
acta1a	-2.34997	9.17632	19.9021	8.15096e-06	7.45114	9.61776	0.00727113
hbaa2	2.15133	7.65325	19.4697	1.02206e-05	8.74094	7.03068	0.00842429
nt5c2l1	2.43929	7.66912	19.4083	1.05547e-05	8.49087	6.6537	0.00842429
ctsla	-1.95076	8.0555	19.2388	1.15348e-05	7.18807	8.9235	0.00874623
tnni4b.3	5.95641	6.81997	19.0516	1.27232e-05	7.52915	5.33493	0.009188
si:dkey-188i13.10	-3.46793	7.28112	17.986	2.22535e-05	5.86538	8.19625	0.0153398
stat2	-1.92839	8.68387	16.4743	4.93148e-05	7.52923	9.31059	0.0325156
tcap	1.80289	8.32963	16.168	5.79656e-05	8.89624	7.41835	0.036627
nppa	-1.04948	10.863	15.6347	7.68337e-05	10.369	11.4793	0.0466073
stat1b	-3.84484	6.84887	15.5105	8.20478e-05	5.60215	7.79376	0.0478559
si:dkey-188i13.7	-2.87843	7.41451	15.3733	8.8226e-05	6.0879	8.14615	0.0495536
isg15	-3.77216	6.81982	14.8379	0.000117155	5.60215	7.73407	0.0634519
slc16a3	1.94648	7.85135	14.253	0.000159804	8.41066	6.92255	0.0835664
lgals3bpb	-3.58753	6.53563	14.1757	0.00016651	5.60215	7.58261	0.0840624
aldoaa	0.370106	12.146	14.1108	0.000172347	12.345	12.0633	0.0840624
ba2	-5.56652	7.08145	14.0567	0.000177382	5.27993	7.29875	0.0840624
rsad2	-3.07512	6.75336	13.8024	0.00020308	5.86537	7.86073	0.0933247
vmo1a	-5.35645	6.41353	13.6246	0.000223244	5.27993	7.14241	0.0995736
zgc:158234	5.2337	6.37153	12.588	0.000388238	6.98148	5.33493	0.167771
fkbp5	3.53807	6.75524	12.5403	0.000398268	7.45122	5.65793	0.167771
eno3	0.333893	12.148	12.3313	0.000445423	12.4364	12.1878	0.182563
tsc22d1	5.23355	6.18533	12.2327	0.00046958	6.98148	5.33493	0.1874
pabpc4	0.64962	11.3688	11.977	0.00053862	11.7854	11.2247	0.20944
parvb	-1.50472	8.0828	11.5152	0.000690285	7.36867	8.73093	0.261704
rbp2a	5.06871	6.45656	11.1922	0.000821404	6.86598	5.33493	0.303819
ctsba	-5.04366	6.45559	10.907	0.000958039	5.27993	6.92255	0.337895
xaf1	-5.04304	6.36993	10.9068	0.000958094	5.27993	6.91846	0.337895
acp1	-5.04263	6.57336	10.8263	0.00100069	5.27993	6.91846	0.344896
eef1a1l1	-0.74053	13.8398	10.6571	0.00109651	13.2754	14.0958	0.369525
gnaia	-3.27193	6.57455	10.5438	0.00116581	5.60215	7.33637	0.384337
gnb5b	-5.04883	6.08197	9.98961	0.00157426	5.27993	6.92387	0.507949
cwc25	2.6873	6.64991	9.81336	0.00173249	7.45114	5.92215	0.543644
zgc:63831	4.88178	6.32679	9.78796	0.00175658	6.74028	5.33493	0.543644
waca	4.88199	6.23373	9.6993	0.00184338	6.74041	5.33493	0.559098
anxa1a	-1.41675	8.50427	9.57149	0.00197623	7.60316	8.91793	0.583284
nmt1a	-4.85673	6.36984	9.54949	0.00200005	5.27993	6.79351	0.583284
zgc:65811	-2.22972	7.37063	9.44638	0.00211567	6.28065	7.92267	0.60536
b2m	-1.21548	10.048	9.34928	0.00223073	9.30385	10.5493	0.626462
atp1a1a.4	-5.18694	5.96837	9.2904	0.00230357	5.27993	7.03068	0.626748
metap2b	1.42291	8.04226	9.27155	0.0023274	8.45134	7.3326	0.626748
arf2a	1.58532	7.75303	9.22818	0.00238319	8.23557	7.03338	0.626748
ckma	-0.289491	12.634	9.14285	0.00249692	12.2646	12.6311	0.626748
pkz	-4.85631	6.1333	9.13255	0.00251101	5.27993	6.79485	0.626748
mxa	-4.85631	6.13327	9.13239	0.00251123	5.27993	6.79485	0.626748
mov10b.1	-2.63821	6.7187	9.12526	0.00252104	5.86538	7.50397	0.626748
mtif2	4.88066	6.08129	9.02724	0.00265986	6.74028	5.33493	0.650592
ftr82	3.19413	6.85084	8.89448	0.00286033	7.18807	5.65793	0.688523
mdh1aa	0.532227	11.4802	8.7663	0.00306847	11.5762	11.1325	0.727082
daam1b	4.66816	6.23396	8.33298	0.00389317	6.60287	5.33493	0.905174
zgc:136864	-2.5347	6.68412	8.28839	0.00398993	5.86538	7.42325	0.905174
si:ch211-157b11.14	-1.3439	8.73499	8.28421	0.00399912	7.86628	9.14508	0.905174
pa2g4a	-4.64285	6.41386	8.19275	0.0042058	5.27993	6.65797	0.927984
slc25a36a	-4.64347	6.32681	8.18538	0.00422293	5.27993	6.66087	0.927984
cyp2ad3	-4.64257	6.2798	8.15956	0.00428347	5.27993	6.6566	0.927984
hypk	-2.64568	7.02837	8.1336	0.00434524	5.86538	7.51006	0.928107
dnajb1b	4.66836	6.13412	8.09263	0.00444455	6.60287	5.33493	0.932137
cyp2aa6	-2.63744	7.08108	8.07539	0.00448704	5.86538	7.50516	0.932137
gstk1	1.23383	8.0832	7.9903	0.00470287	8.56681	7.58626	0.959918
pln	-0.309162	12.0775	7.97325	0.00474737	11.7734	12.1622	0.959918
mfn2	1.43657	7.70396	7.84187	0.00510498	8.23557	7.14368	0.986397
prkag1	4.66871	6.08158	7.83793	0.00511612	6.60287	5.33493	0.986397
ccdc9	4.66532	6.0811	7.82212	0.00516106	6.60287	5.33493	0.986397
alas2	1.20325	8.80656	7.81291	0.00518744	9.52946	8.49847	0.986397
zgc:86709	-1.47535	8.12952	7.8073	0.00520355	6.98159	8.2316	0.986397
sept8a	-4.84937	5.96937	7.66218	0.00563903	5.27993	6.79351	1
tnni1b	-0.561189	11.3377	7.62201	0.00576601	10.7814	11.413	1
myh7	1.27462	9.27101	7.61648	0.00578373	9.77737	8.66655	1
xpo4	-4.63474	6.07969	7.59775	0.00584413	5.27993	6.6537	1
si:ch73-111k22.2	2.9127	6.41437	7.46502	0.00629093	6.98148	5.65793	1
strip1	4.66894	6.02753	7.4616	0.00630288	6.60273	5.33493	1
mybpc3	0.29789	12.0487	7.3286	0.00678657	12.1049	11.8886	1
esf1	-4.63475	6.02595	7.235	0.00714957	5.27993	6.65508	1
bmp10	-2.86737	6.32737	7.16573	0.00743093	5.60215	7.04009	1
acaa2	1.52059	7.61292	7.14489	0.00751777	8.03626	6.92123	1
si:dkey-188i13.9	-2.00206	6.81944	7.0897	0.00775282	6.28065	7.73294	1
xrn2	-2.86583	6.23267	7.04255	0.00795957	5.60215	7.03468	1
si:ch73-252i11.1	-2.41889	6.7856	6.97182	0.00828031	5.86538	7.33392	1
cyp2p6	2.1561	6.78661	6.96077	0.00833162	7.45114	6.1439	1
lrrc1	4.66971	5.97086	6.95537	0.00835679	6.60287	5.33493	1
rasgef1bb	4.41581	6.23329	6.95535	0.00835689	6.45066	5.33493	1
mcts1	4.41548	6.23319	6.95414	0.00836253	6.45066	5.33493	1
cyr61l2	2.15589	6.78815	6.95332	0.00836636	7.45122	6.14536	1
ndufa10	-1.4685	7.75078	6.9487	0.00838804	6.86598	8.0879	1
hhatlb	4.66242	5.97032	6.92654	0.00849259	6.60287	5.33493	1
klf2a	-2.8639	6.68207	6.92394	0.00850493	5.60215	7.03197	1
mob1ba	-2.86747	6.18488	6.91201	0.00856188	5.60215	7.03738	1
wtap	2.91071	6.13441	6.91111	0.00856619	6.98148	5.65793	1
si:ch73-380l3.2	-4.39062	6.32509	6.82073	0.00901059	5.27993	6.50224	1
rasip1	-4.39123	6.28044	6.80875	0.0090712	5.27993	6.5052	1
ech1	4.41564	6.13414	6.78605	0.00918728	6.45066	5.33493	1
rab40b	4.41564	6.13406	6.78583	0.00918842	6.45066	5.33493	1
sesn1	1.09916	8.09534	6.78194	0.0092085	8.60338	7.72252	1
csnk2a2a	4.41511	6.13321	6.78174	0.00920953	6.45066	5.33493	1
fip1l1b	4.4146	6.13376	6.78153	0.0092106	6.45066	5.33493	1
arhgdig	-4.39165	6.2334	6.78006	0.0092182	5.27993	6.50661	1
dnajc3b	-4.63761	5.96963	6.75666	0.00933984	5.27993	6.6566	1
ncor2	-2.41546	6.84861	6.74968	0.00937644	5.86538	7.33137	1
ube2al	-4.39097	6.18395	6.71868	0.00954083	5.27993	6.5052	1
slc25a4	-4.38977	6.18412	6.71454	0.00956299	5.27993	6.50364	1
timm17a	1.32659	7.86756	6.64752	0.00992942	8.13936	7.14241	1
farsb	-4.39067	6.13405	6.61362	0.0101202	5.27993	6.5052	1
ubtfl	4.41662	6.0812	6.60572	0.0101652	6.45082	5.33493	1
ghrb	1.96409	7.28217	6.49192	0.0108366	7.60316	6.33429	1
psmb8a	-4.39296	6.08106	6.44322	0.0111376	5.27993	6.50661	1
smarce1	2.16011	6.99939	6.37331	0.0115849	7.45122	6.14223	1
pfkmb	-1.19835	9.2035	6.34473	0.011773	8.36884	9.55204	1
man1a2	4.66296	5.91178	6.31761	0.0119545	6.60272	5.33493	1
ccdc28b	4.41251	6.02678	6.31746	0.0119555	6.45066	5.33493	1
hsp90ab1	0.239586	12.1767	6.30895	0.012013	12.3396	12.1858	1
f13a1a.1	4.66082	5.91113	6.30465	0.0120422	6.60287	5.33493	1
akr7a3	2.74751	6.41484	6.29338	0.012119	6.86597	5.65793	1
arhgap29b	2.7477	6.37051	6.29204	0.0121281	6.86598	5.65641	1
hspb2	2.74763	6.4977	6.27577	0.01224	6.86598	5.65793	1
gtpbp4	1.12418	9.08392	6.25199	0.0124054	9.70775	8.73177	1
lats2	2.74791	6.28137	6.25165	0.0124078	6.86598	5.65641	1
mdh1ab	1.05174	8.4179	6.22152	0.0126207	8.83606	7.97997	1
f10	-1.21245	8.35907	6.20171	0.0127627	7.36867	8.46563	1
si:dkey-72l14.4	-4.39841	6.02721	6.19705	0.0127963	5.27993	6.50817	1
rtca	2.74777	6.23355	6.18994	0.0128479	6.86598	5.65641	1
agpat2	-4.38954	6.02611	6.16383	0.0130389	5.27993	6.5052	1
grb10a	-1.91711	7.28184	6.16373	0.0130396	6.28065	7.66197	1
scn3b	1.2477	7.7556	6.16362	0.0130404	8.18827	7.24521	1
sdc4	-4.63608	5.91078	6.15887	0.0130755	5.27993	6.6566	1
me1	-4.38492	6.02557	6.14664	0.0131662	5.27993	6.50364	1
clic2	-1.27557	7.99815	6.12239	0.0133481	7.08842	8.19421	1
hagh	2.74786	6.18471	6.07567	0.0137056	6.86598	5.65641	1
atf4a	-1.27389	7.785	6.05853	0.0138393	7.08842	8.18913	1
slc4a1a	1.10914	7.70352	6.05265	0.0138854	8.45138	7.57788	1
acat1	1.39018	7.81869	6.04972	0.0139085	7.92517	6.92255	1
ezrb	-2.70179	6.32569	6.03006	0.0140642	5.60215	6.92123	1
psmb7	-2.70143	6.32559	6.028	0.0140807	5.60215	6.91978	1
lclat1	4.41913	5.97073	5.96466	0.0145954	6.45082	5.33493	1
calm3b	2.34834	6.97146	5.95796	0.014651	7.18798	5.92041	1
trafd1	4.41718	5.97047	5.95724	0.014657	6.45082	5.33493	1
cox6a1	4.41496	5.97049	5.95087	0.01471	6.45066	5.33493	1
bms1	4.41496	5.97036	5.94992	0.0147179	6.45066	5.33493	1
cfd	1.11175	7.91213	5.94921	0.0147239	8.36884	7.50516	1
edc3	4.41301	5.97048	5.94533	0.0147563	6.45066	5.33493	1
tom1l2	2.74559	6.81835	5.85267	0.0155534	6.86585	5.65793	1
minos1	-1.68944	7.45529	5.85034	0.015574	6.45066	7.72597	1
cux1b	-4.40131	5.97121	5.84479	0.0156233	5.27993	6.50817	1
gp1bb	1.94007	6.53747	5.82834	0.01577	7.28119	6.14223	1
ftr14	-4.39492	5.97033	5.82057	0.0158398	5.27993	6.50661	1
dhx58	-4.38876	5.96993	5.80065	0.0160203	5.27993	6.5052	1
asph	-4.38232	5.96978	5.78161	0.0161947	5.27993	6.50364	1
trim63b	-2.3024	7.18474	5.73775	0.0166041	5.86538	7.24521	1
snx9b	2.04772	6.91337	5.71891	0.0167832	7.36867	6.14536	1
si:dkey-4p15.3	4.11121	6.32687	5.60788	0.0178799	6.28083	5.33493	1
tnni3k	2.21287	6.71926	5.59793	0.0179817	7.08852	5.92041	1
socs3a	4.11119	6.27997	5.59778	0.0179833	6.28083	5.33493	1
lgals3b	2.05035	7.10794	5.58905	0.0180731	7.36867	6.1439	1
slc25a55b	-2.16469	6.57479	5.55839	0.0183924	5.86538	7.14368	1
serinc2	-2.16421	6.57438	5.55623	0.018415	5.86538	7.14241	1
tnpo3	1.86769	6.9417	5.53431	0.0186471	7.52915	6.33591	1
nek7	-2.16487	6.61214	5.51503	0.0188537	5.86537	7.14368	1
mat2ab	-1.88922	6.53502	5.50483	0.018964	6.08791	7.33137	1
ctdspl2a	-4.63469	5.84941	5.49933	0.0190238	5.27993	6.6566	1
rnf111	4.41751	5.91182	5.49217	0.0191018	6.45082	5.33493	1
nipal3	4.41466	5.91154	5.48245	0.0192083	6.45066	5.33493	1
atp5mea	-2.70239	7.20804	5.47339	0.0193081	5.60215	6.92123	1
mrpl27	4.11024	6.13399	5.46513	0.0193996	6.28065	5.33493	1
cand2	4.11024	6.1339	5.46496	0.0194015	6.28065	5.33493	1
rpap3	4.11023	6.1332	5.4637	0.0194155	6.28065	5.33493	1
vwf	1.01561	8.72296	5.4093	0.0200298	9.18839	8.34066	1
cox7c	1.12382	9.16676	5.40414	0.020089	9.28149	8.33383	1
ube2d1b	-4.08664	6.18434	5.39716	0.0201696	5.27993	6.33591	1
erp44	-1.68759	7.30262	5.38693	0.0202881	6.45082	7.72597	1
nudt9	4.11201	6.08198	5.35191	0.0206996	6.28083	5.33493	1
cd2ap	-4.38793	5.91095	5.34667	0.0207619	5.27993	6.5052	1
laptm4b	4.11077	6.08124	5.34622	0.0207672	6.28065	5.33493	1
mcee	4.11077	6.08121	5.34612	0.0207684	6.28065	5.33493	1
zgc:101723	-2.70406	6.08215	5.34455	0.0207872	5.60215	6.92255	1
usf1l	-4.08834	6.13418	5.3339	0.0209145	5.27993	6.33734	1
zgc:77650	-4.08835	6.13394	5.3335	0.0209194	5.27993	6.33734	1
gstt1b	-4.08835	6.13374	5.33316	0.0209234	5.27993	6.33734	1
postnb	-1.99312	7.13278	5.27827	0.0215932	6.0879	7.41706	1
agla	-1.12807	7.70145	5.23544	0.0221312	7.28119	8.29045	1
col1a1b	-1.07785	9.55594	5.23141	0.0221826	8.52938	9.61481	1
specc1la	-4.09278	6.08161	5.23015	0.0221987	5.27993	6.33895	1
ppdpfa	0.973763	9.90661	5.21744	0.0223615	9.93974	9.09633	1
cdc14b	-4.08355	6.08038	5.20224	0.0225579	5.27993	6.33429	1
appa	1.12449	8.13572	5.18327	0.0228053	8.18826	7.33892	1
mmp14b	-2.16251	6.78352	5.18307	0.022808	5.86537	7.14103	1
cahz	0.883041	8.49616	5.16474	0.0230499	9.18839	8.45629	1
coasy	4.10935	6.0265	5.15757	0.0231453	6.28065	5.33493	1
btbd10a	2.56123	6.37127	5.14789	0.0232746	6.74041	5.65641	1
2023-03-07	2.56123	6.37026	5.14778	0.0232761	6.74041	5.65641	1
map2k6	2.56098	6.45533	5.14458	0.0233191	6.74041	5.65793	1
cavin2a	2.56111	6.32736	5.13847	0.0234012	6.74041	5.65793	1
dsc2l	1.9369	6.85225	5.10818	0.0238134	7.2811	6.14536	1
ank1a	1.57402	7.28146	5.09697	0.0239677	7.74067	6.65508	1
srebf2	2.561	6.2345	5.07245	0.024309	6.74041	5.65793	1
lyrm2	-4.08687	6.02638	5.03438	0.024849	5.27993	6.33591	1
zgc:152830	-4.082	6.02636	5.02197	0.0250277	5.27993	6.33429	1
srp14	-4.08199	6.02626	5.02158	0.0250333	5.27993	6.33429	1
ddx5	-0.994997	8.72002	5.01723	0.0250962	8.18826	9.16954	1
ndufa8	1.01357	8.10873	5.00367	0.0252937	8.36888	7.58626	1
fbxo34	-1.60221	7.05626	4.99936	0.0253567	6.60272	7.86183	1
vdac2	0.392021	11.4862	4.99757	0.0253829	11.6259	11.32	1
smyd1b	-1.5216	7.36965	4.9924	0.0254589	6.60273	7.79605	1
idh2	0.201073	12.3126	4.94767	0.0261259	12.3743	12.2586	1
pdgfrl	1.29421	7.47687	4.94308	0.0261954	7.98176	7.03338	1
ryk	-2.51571	6.41426	4.93626	0.0262989	5.60215	6.79903	1
arf5	-2.515	6.37025	4.93147	0.0263719	5.60215	6.79351	1
rbms2b	-2.51547	6.49641	4.92284	0.0265039	5.60215	6.79633	1
raly	-2.51494	6.32544	4.92225	0.026513	5.60215	6.79351	1
tpm2	1.56388	7.51776	4.92035	0.0265421	7.52923	6.50661	1
srebf1	4.11531	5.971	4.91996	0.0265482	6.28083	5.33493	1
mrc1b	-2.51454	6.49542	4.91878	0.0265663	5.60215	6.79203	1
baxa	4.11323	5.9704	4.91204	0.0266702	6.28083	5.33493	1
tgm2b	-2.51512	6.53489	4.9076	0.0267387	5.60215	6.79485	1
cmtr1	-2.5158	6.28107	4.90573	0.0267678	5.60215	6.79768	1
nrbf2b	4.11079	5.97021	4.90504	0.0267784	6.28065	5.33493	1
wu:fa19b12	4.11079	5.96998	4.90388	0.0267964	6.28065	5.33493	1
fam160b2	4.11079	5.96993	4.9036	0.0268008	6.28065	5.33493	1
loxl2b	4.1087	5.97036	4.90088	0.026843	6.28065	5.33493	1
kdm4b	2.06497	6.49715	4.89565	0.0269244	6.98159	5.92041	1
lyrm7	2.065	6.497	4.89565	0.0269245	6.98148	5.92041	1
hhla2a.1	1.81718	6.57537	4.87675	0.0272208	7.18807	6.14223	1
tlk1b	2.06538	6.28184	4.87237	0.0272899	6.98159	5.92041	1
slc43a1a	2.56083	6.78706	4.87001	0.0273273	6.74041	5.65641	1
ckmt2a	1.01895	8.72859	4.86332	0.0274336	8.92529	8.09001	1
zmiz1a	-4.39712	5.85005	4.85703	0.0275338	5.27993	6.50661	1
LOC795545	-0.502606	11.1304	4.84574	0.0277146	10.7491	11.3223	1
dcaf12	-4.38715	5.84934	4.82972	0.0279731	5.27993	6.5052	1
tcerg1a	2.55934	6.13398	4.82785	0.0280036	6.74028	5.65793	1
ngdn	-4.10049	5.97126	4.82464	0.0280558	5.27993	6.33895	1
sgpl1	-4.087	5.97028	4.7882	0.0286553	5.27993	6.33591	1
mbnl1	-2.51696	6.18536	4.78788	0.0286607	5.60215	6.79768	1
chsy3	-4.08	5.96886	4.76484	0.0290467	5.27993	6.33429	1
mapre3b	-1.88685	6.88146	4.76281	0.0290811	6.08791	7.33392	1
tpm4a	-0.568727	14.0897	4.75404	0.0292296	13.7068	14.3542	1
gstm.3	-1.00994	7.75087	4.72285	0.0297644	7.45114	8.37399	1
aftpha	2.06503	6.18571	4.69877	0.0301842	6.98148	5.92041	1
mrps24	-2.01671	6.37058	4.66185	0.03084	5.86537	7.03738	1
zgc:92429	-2.01622	6.3699	4.65921	0.0308875	5.86538	7.03468	1
gna12a	-2.0169	6.49774	4.64762	0.0310966	5.86538	7.03868	1
hsf2	-2.0165	6.49605	4.64638	0.0311191	5.86538	7.03609	1
abcc9	-1.89036	6.96998	4.63647	0.0312994	6.08791	7.33637	1
jak2a	1.19198	7.43689	4.63576	0.0313122	8.1393	7.24262	1
mgst3a	-1.89036	6.97106	4.63533	0.0313202	6.08791	7.33637	1
ccng2	-2.51088	6.13268	4.61328	0.0317253	5.60215	6.79203	1
ppp1r12a	-1.89035	7.10783	4.60398	0.0318978	6.08791	7.33637	1
atp6ap1b	4.1168	5.91162	4.59083	0.0321434	6.28083	5.33493	1
kdelr2b	4.11397	5.91207	4.58747	0.0322065	6.28083	5.33493	1
dhrs13l1	2.55918	6.08181	4.58508	0.0322515	6.74041	5.65793	1
naa50	-1.61552	6.64791	4.58097	0.0323289	6.28065	7.42205	1
kif1b	4.10798	5.91152	4.57113	0.0325151	6.28065	5.33493	1
cpsf3	4.10798	5.91152	4.57113	0.0325151	6.28065	5.33493	1
rnd1a	4.10798	5.91124	4.5694	0.0325479	6.28065	5.33493	1
fth1a	0.553364	10.9004	4.5612	0.0327041	11.1457	10.6821	1
ncoa4	0.965967	7.98537	4.55543	0.0328145	8.32577	7.58145	1
mycb	2.06248	6.78712	4.53328	0.0332419	6.98148	5.92215	1
capzb	-1.08166	7.95383	4.52675	0.0333689	7.18807	8.13892	1
elna	-4.1053	5.91183	4.51189	0.03366	5.27993	6.33895	1
si:dkey-206d17.5	-1.76745	6.6491	4.49826	0.0339294	6.0879	7.24262	1
zranb2	1.81713	6.78616	4.49254	0.0340431	7.18807	6.14223	1
trip12	-1.71748	7.02609	4.47041	0.0344867	6.28065	7.50397	1
pum3	-4.08714	5.91074	4.46694	0.0345569	5.27993	6.33591	1
ube2l3b	-4.08714	5.91069	4.46662	0.0345632	5.27993	6.33591	1
si:ch211-235e9.6	-1.71746	7.05447	4.46386	0.0346191	6.28065	7.50397	1
krtcap2	-4.07787	5.91079	4.44754	0.0349515	5.27993	6.33429	1
srgap2	-4.07786	5.91069	4.44695	0.0349637	5.27993	6.33429	1
ehd1a	-4.07785	5.91023	4.44429	0.0350182	5.27993	6.33429	1
arglu1b	-1.76691	6.68345	4.43729	0.035162	6.0879	7.24137	1
dohh	-1.61583	6.71829	4.42814	0.035351	6.28065	7.42325	1
syt1a	1.56871	7.28236	4.42218	0.0354747	7.52915	6.50224	1
nme2b.2	-0.331728	11.6411	4.41376	0.0356503	11.3259	11.7335	1
edn1	4.41808	5.78607	4.39784	0.0359845	6.45082	5.33493	1
nop53	0.844013	8.46812	4.39432	0.0360587	8.98187	8.29539	1
tpt1	0.267359	11.8329	4.38709	0.036212	12.0365	11.8519	1
cox5aa	0.973291	8.94171	4.38522	0.0362519	9.18838	8.3778	1
zgc:92606	1.66599	6.85092	4.37346	0.0365028	7.36867	6.33591	1
ralba	-1.08425	7.64984	4.32564	0.0375424	7.18807	8.14716	1
fkbp9	-4.38647	5.78564	4.29117	0.0383107	5.27993	6.5052	1
gnb1b	-2.01812	6.81865	4.26746	0.0388491	5.86537	7.03738	1
sdr16c5b	-4.37456	5.78493	4.26392	0.03893	5.27993	6.50364	1
pcca	1.24955	7.51731	4.23983	0.0394862	7.80487	6.91978	1
ckba	-1.61187	6.78559	4.2393	0.0394985	6.28083	7.42084	1
timp2a	-1.19603	7.66582	4.13802	0.0419302	6.86597	7.85624	1
magi1b	3.72454	6.13469	4.13216	0.0420757	6.08811	5.33493	1
eif4ebp3	-4.09847	5.85042	4.12071	0.0423614	5.27993	6.33734	1
neil1	-4.09848	5.85031	4.11999	0.0423794	5.27993	6.33734	1
hapln1a	3.7236	6.84968	4.11577	0.0424851	6.08791	5.33493	1
prnprs3	0.85661	8.18668	4.10867	0.0426639	8.52934	7.86073	1
tbca	-3.69915	6.32512	4.09948	0.0428965	5.27993	6.14223	1
chmp3	-4.08729	5.84977	4.09569	0.0429928	5.27993	6.33591	1
fam160b1	-4.08729	5.84947	4.09379	0.0430409	5.27993	6.33591	1
hmgb1b	-3.69881	6.2799	4.09343	0.0430503	5.27993	6.14077	1
cnn3b	-4.08729	5.84938	4.09322	0.0430556	5.27993	6.33591	1
msrb3	-1.61402	7.30335	4.08857	0.0431741	6.28065	7.42205	1
si:ch211-14a17.11	-4.0757	5.84912	4.06994	0.0436528	5.27993	6.33429	1
msra	-4.0757	5.84901	4.06928	0.0436699	5.27993	6.33429	1
map3k5	1.46741	6.75305	4.06524	0.0437744	7.45114	6.50364	1
pparaa	-3.7002	6.18405	4.06432	0.0437984	5.27993	6.1439	1
cfap36	-3.69881	6.18374	4.06087	0.0438879	5.27993	6.14223	1
myoz2a	3.72376	6.08178	4.06077	0.0438904	6.08791	5.33493	1
si:ch211-286b5.5	-3.69787	6.18385	4.05901	0.0439362	5.27993	6.14077	1
neurl1b	3.72283	6.08135	4.05822	0.0439569	6.0879	5.33493	1
uqcc3	-4.06442	5.84847	4.04513	0.044299	5.27993	6.33286	1
fundc2	1.2497	7.43661	4.03947	0.0444478	7.80487	6.91978	1
sid4	2.34702	6.3708	4.03801	0.0444863	6.60287	5.65641	1
mmadhc	-1.61642	6.88183	4.03739	0.0445026	6.28083	7.42455	1
kdm5bb	2.34704	6.32668	4.03175	0.0446517	6.60287	5.65641	1
rbx1	2.34681	6.53657	4.0189	0.044993	6.60287	5.65793	1
si:ch211-199o1.2	2.34698	6.28161	4.01668	0.0450523	6.60287	5.65793	1
fscn1a	2.3468	6.28191	4.01618	0.0450657	6.60287	5.65793	1
si:dkey-23c22.6	2.34647	6.28105	4.01437	0.045114	6.60272	5.65793	1
zranb1b	1.68243	6.57611	4.00366	0.0454016	7.08852	6.1439	1
phf20b	1.68194	6.575	4.00207	0.0454443	7.08842	6.1439	1
eif4ebp2	0.912736	8.63167	3.98686	0.0458563	8.77329	8.03923	1
sufu	2.34721	6.23321	3.98556	0.0458918	6.60287	5.65641	1
emc10	2.34629	6.23332	3.98223	0.0459827	6.60272	5.65793	1
ramp2	-1.02236	7.89741	3.96615	0.0464238	7.18807	8.09422	1
pgp	3.726	6.0274	3.95792	0.0466513	6.08811	5.33493	1
si:ch211-262i1.6	3.72406	6.02739	3.95374	0.0467673	6.08791	5.33493	1
tram1	3.72406	6.02732	3.95358	0.0467718	6.08791	5.33493	1
ppp3ccb	3.72406	6.02714	3.95315	0.0467836	6.08791	5.33493	1
eprs	-1.51272	6.94187	3.94792	0.0469295	6.45082	7.58386	1
ube3c	3.72105	6.02687	3.94667	0.0469643	6.0879	5.33493	1
ptbp1b	-3.69495	6.08049	3.94656	0.0469673	5.27993	6.14077	1
sec63	3.72104	6.0264	3.94555	0.0469954	6.0879	5.33493	1
hipk2	1.89983	6.37176	3.93943	0.0471667	6.86598	5.92041	1
llgl2	1.89978	6.32704	3.93012	0.0474285	6.86598	5.92041	1
pecam1	2.34799	6.18508	3.92953	0.0474453	6.60287	5.65641	1
stk17al	2.34647	6.18571	3.92535	0.0475633	6.60287	5.65793	1
fbxo28	2.3469	6.18485	3.9252	0.0475676	6.60272	5.65641	1
dcn	-1.10529	8.08037	3.91918	0.0477381	6.98148	7.9216	1
zgc:92027	1.90014	6.53618	3.9144	0.047874	6.86598	5.91892	1
mrpl24	1.89989	6.53674	3.91308	0.0479116	6.86597	5.91892	1
alas1	0.976652	9.31163	3.91268	0.0479231	9.13945	8.33092	1
crot	1.89869	6.53683	3.90892	0.0480306	6.86597	5.92215	1
ankrd6b	1.89885	6.28155	3.90558	0.048126	6.86598	5.92215	1
rpl3	0.200984	12.1329	3.89958	0.0482981	12.1764	12.0577	1
ywhaba	-1.19896	7.51678	3.89332	0.0484786	6.86598	7.86183	1
apmap	1.89841	6.57453	3.88748	0.0486473	6.86597	5.92215	1
pgam1b	1.68194	6.6849	3.8724	0.0490861	7.08842	6.1439	1
exoc7	-2.3015	6.37124	3.85982	0.0494555	5.60215	6.65949	1
dnm2a	-3.70229	6.02693	3.8584	0.0494976	5.27993	6.1439	1
smg5	-2.30113	6.45494	3.85683	0.0495438	5.60215	6.65797	1
rab6a	-2.30056	6.37	3.85599	0.0495686	5.60215	6.65508	1
creb3l2	-2.30054	6.45405	3.85465	0.0496082	5.60215	6.65508	1
fzr1a	-2.30156	6.32713	3.85404	0.0496263	5.60215	6.65949	1
slc25a24	4.42238	5.71926	3.85282	0.0496625	6.45082	5.33493	1
plagx	4.4183	5.71914	3.84574	0.0498726	6.45082	5.33493	1
pdia3	-0.80224	8.3607	3.83967	0.0500534	8.03621	8.82919	1
gtf3c3	4.41394	5.71894	3.83765	0.0501137	6.45066	5.33493	1
pcolce2b	-3.6923	6.02601	3.83691	0.0501358	5.27993	6.14077	1
rnf213a	-1.50647	7.07965	3.83073	0.0503211	6.45066	7.57904	1
oaz1a	0.849555	8.19688	3.82855	0.0503866	8.45138	7.79148	1
nr1d1	1.68416	6.71974	3.82767	0.0504129	7.08852	6.14223	1
adh8a	1.2421	7.3717	3.82568	0.050473	7.80481	6.92532	1
oaz2a	1.68308	6.71906	3.82366	0.0505336	7.08842	6.14223	1
fhl2b	-2.29974	6.57317	3.82283	0.0505587	5.60215	6.6537	1
pes	-1.63319	6.41357	3.82056	0.0506273	6.0879	7.14241	1
tmem9b	2.34629	6.13395	3.81618	0.05076	6.60287	5.65641	1
fzd9b	-2.30106	6.23356	3.80783	0.0510135	5.60215	6.65797	1
si:ch73-109d9.2	3.72714	5.97087	3.80521	0.0510935	6.08811	5.33493	1
zgc:122979	3.72715	5.97068	3.80464	0.0511109	6.08811	5.33493	1
dis3l	3.72219	5.97038	3.79421	0.0514301	6.0879	5.33493	1
uba3	3.72219	5.97019	3.79363	0.051448	6.0879	5.33493	1
b4galnt1a	3.72219	5.97009	3.79332	0.0514575	6.0879	5.33493	1
zbtb2b	4.11958	5.78627	3.78552	0.0516978	6.28083	5.33493	1
snrnp200	-1.6331	6.53604	3.78486	0.0517181	6.0879	7.14241	1
tnk2b	4.11959	5.78612	3.78457	0.0517271	6.28083	5.33493	1
eci2	1.00949	7.83614	3.78284	0.0517807	7.98176	7.24262	1
zgc:56493	-0.909126	7.91112	3.78179	0.0518132	7.45122	8.28847	1
mrpl21	4.11538	5.7862	3.77824	0.0519232	6.28083	5.33493	1
grsf1	-1.50246	6.68409	3.7668	0.0522795	6.28083	7.33637	1
pfkfb4b	4.10663	5.78608	3.76311	0.0523951	6.28065	5.33493	1
zgc:77849	1.00968	7.78785	3.76231	0.0524201	7.98181	7.24387	1
ints11	4.10662	5.78594	3.76221	0.0524232	6.28065	5.33493	1
commd1	4.10662	5.78589	3.76184	0.0524348	6.28065	5.33493	1
tdh	1.01057	8.09533	3.75549	0.0526343	7.98181	7.24002	1
nsrp1	-2.30216	6.18467	3.75503	0.0526488	5.60215	6.65949	1
slc2a1a	-4.11424	5.78609	3.73449	0.0533	5.27993	6.33895	1
id2b	-1.63379	6.61317	3.72792	0.0535101	6.08811	7.14633	1
hopx	-1.63376	6.6124	3.72784	0.0535124	6.08791	7.14495	1
cpsf6	-1.63344	6.61193	3.72681	0.0535455	6.0879	7.14368	1
psmc4	-1.85157	6.41418	3.72663	0.0535515	5.86538	6.92123	1
mpzl1l	-1.85198	6.49694	3.71583	0.0538988	5.86538	6.92387	1
mtus1a	-0.909833	7.75336	3.71481	0.0539318	7.45114	8.29045	1
api5	-1.85121	6.32561	3.71453	0.053941	5.86538	6.91978	1
polr2f	-1.85158	6.49638	3.71437	0.0539461	5.86538	6.92123	1
dhcr7	-4.10067	5.78622	3.71326	0.053982	5.27993	6.33734	1
cldnc	-4.10067	5.78608	3.71238	0.0540102	5.27993	6.33734	1
setd7	-4.10067	5.78596	3.71165	0.0540338	5.27993	6.33734	1
abcf2b	-3.70358	5.97039	3.71101	0.0540546	5.27993	6.1439	1
plekha7a	-1.0226	7.61177	3.71028	0.0540785	7.18807	8.09211	1
calr	-4.10069	5.78562	3.70951	0.0541034	5.27993	6.33734	1
chtopa	-1.85114	6.53582	3.69863	0.0544573	5.86538	6.91978	1
tssc4	-3.69601	5.96984	3.69529	0.0545662	5.27993	6.14223	1
zgc:162198	-3.69601	5.96977	3.69508	0.0545732	5.27993	6.14223	1
znf207a	-3.696	5.9697	3.69486	0.0545805	5.27993	6.14223	1
ldlrad3	-3.696	5.96951	3.6943	0.0545987	5.27993	6.14223	1
aox6	-3.696	5.96931	3.69369	0.0546185	5.27993	6.14223	1
mpeg1.2	-4.08742	5.78542	3.68691	0.0548411	5.27993	6.33591	1
rnft1	-4.08742	5.78542	3.68691	0.0548411	5.27993	6.33591	1
nfrkb	-4.08742	5.78537	3.6866	0.0548514	5.27993	6.33591	1
cldn5b	-3.68888	5.96988	3.68251	0.0549859	5.27993	6.14077	1
med11	-3.68839	5.96904	3.6788	0.0551086	5.27993	6.14056	1
mrpl38	1.89888	6.78528	3.66506	0.0555646	6.86597	5.92041	1
sumf1	-4.07376	5.78531	3.66428	0.0555906	5.27993	6.33429	1
caprin1b	0.826523	9.60926	3.66424	0.055592	10.1144	9.40216	1
ralbp1	-4.07375	5.78491	3.66177	0.0556744	5.27993	6.33429	1
dennd4a	-4.07375	5.78491	3.66177	0.0556744	5.27993	6.33429	1
ahr2	-0.831498	8.0425	3.65848	0.0557846	7.67362	8.46563	1
vsir	-1.85059	6.23253	3.64862	0.0561158	5.86537	6.91846	1
ube2b	-2.30096	6.13363	3.64828	0.0561271	5.60215	6.65797	1
prkcbp1l	1.6817	6.82003	3.64512	0.0562337	7.08842	6.1439	1
stk11	2.34429	6.08189	3.63714	0.0565041	6.60272	5.65793	1
inpp4ab	2.34429	6.08183	3.6369	0.0565122	6.60272	5.65793	1
necap2	-1.85142	6.64803	3.62522	0.05691	5.86538	6.92123	1
ckbb	-0.897205	9.08029	3.61426	0.0572861	8.4107	9.31329	1
acadvl	0.450315	11.0327	3.60697	0.0575379	11.3039	10.9411	1
acap1	3.72848	5.91158	3.60093	0.0577472	6.08811	5.33493	1
si:ch211-57i17.1	3.7249	5.91172	3.59505	0.0579518	6.08791	5.33493	1
nt5c2b	3.7249	5.91139	3.59381	0.0579953	6.08791	5.33493	1
fam172a	3.7249	5.91126	3.59331	0.0580127	6.08791	5.33493	1
hey2	3.7249	5.91126	3.59331	0.0580127	6.08791	5.33493	1
ube2j1	3.7249	5.9112	3.59306	0.0580214	6.08791	5.33493	1
twnk	3.7249	5.91112	3.59276	0.0580317	6.08791	5.33493	1
n6amt1	3.7249	5.91112	3.59276	0.0580317	6.08791	5.33493	1
smurf2	3.72176	5.91138	3.58838	0.0581848	6.0879	5.33493	1
srsf9	3.72176	5.91128	3.58799	0.0581985	6.0879	5.33493	1
srek1	3.72176	5.91107	3.5872	0.0582264	6.0879	5.33493	1
csrp1a	-1.63262	6.71854	3.58576	0.0582768	6.0879	7.14241	1
dync1i2a	-1.85361	6.18533	3.5841	0.0583349	5.86538	6.92399	1
rbm5	3.71864	5.91167	3.58409	0.0583354	6.0879	5.33493	1
eno1a	-0.65312	10.3406	3.56496	0.0590111	9.99575	10.7075	1
isca2	-1.85168	6.7176	3.55352	0.0594194	5.86538	6.92123	1
ctnnb1	0.858797	9.06791	3.53716	0.060008	9.41076	8.69056	1
si:dkey-24l11.2	-3.71498	5.91183	3.53336	0.0601459	5.27993	6.14536	1
ccdc82	-3.715	5.9115	3.53218	0.0601886	5.27993	6.14536	1
sec22bb	-3.71501	5.9114	3.53181	0.0602019	5.27993	6.14536	1
mrps35	1.45869	7.02822	3.52265	0.0605357	7.45114	6.50958	1
llph	-3.70509	5.91177	3.51634	0.0607666	5.27993	6.1439	1
lyve1a	-3.7051	5.91149	3.51529	0.0608048	5.27993	6.1439	1
vps53	-3.7051	5.91142	3.51506	0.0608136	5.27993	6.1439	1
ecsit	-3.70511	5.91112	3.51397	0.0608536	5.27993	6.1439	1
pym1	-3.70511	5.91091	3.5132	0.0608816	5.27993	6.1439	1
hmgcrb	-2.30474	6.08161	3.49569	0.0615288	5.60215	6.65949	1
snu13b	-3.69475	5.9108	3.49502	0.0615535	5.27993	6.14223	1
cyp2v1	-3.69473	5.91007	3.49232	0.061654	5.27993	6.14223	1
pald1a	1.42945	6.45722	3.48275	0.0620116	7.18798	6.33734	1
wdsub1	-3.68483	5.91052	3.47733	0.0622149	5.27993	6.14077	1
meox1	-3.68483	5.91052	3.47733	0.0622149	5.27993	6.14077	1
mibp	1.43053	6.49773	3.4753	0.0622913	7.18817	6.33429	1
per2	1.55261	7.05372	3.47239	0.062401	7.2811	6.33429	1
mut	0.754858	8.10974	3.46458	0.0626964	8.56677	7.98103	1
rps27l	-2.29521	6.08028	3.46109	0.0628288	5.60215	6.65508	1
arg2	1.00759	7.82088	3.44496	0.0634451	7.86628	7.14495	1
si:dkey-42i9.6	-1.63531	6.81812	3.43778	0.0637211	6.0879	7.14495	1
mars	-1.8512	6.13429	3.43469	0.0638407	5.86538	6.92123	1
lsm12b	-1.35248	7.15912	3.42921	0.0640529	6.60287	7.65845	1
trim55b	-1.85	6.81752	3.42381	0.0642626	5.86538	6.91978	1
rpl38	-0.806994	9.57591	3.42289	0.0642983	9.25877	10.1084	1
tab2	2.35084	6.02734	3.40304	0.0650762	6.60287	5.65641	1
mak	2.34956	6.027	3.3975	0.0652954	6.60287	5.65641	1
pcnt	2.34673	6.02692	3.38865	0.0656467	6.60272	5.65641	1
ddx21	0.767871	8.46704	3.38596	0.065754	8.80496	8.19316	1
ndufb10	0.85118	8.99879	3.36399	0.0666362	9.2122	8.50677	1
si:ch211-248e11.2	3.72986	5.85093	3.35537	0.066986	6.08811	5.33493	1
uba1	-0.960639	7.55737	3.35444	0.067024	7.28119	8.14509	1
hs6st2	3.72987	5.85035	3.3529	0.0670867	6.08811	5.33493	1
cul3b	4.11595	5.71927	3.34953	0.0672243	6.28083	5.33493	1
bcas3	3.72537	5.85015	3.34478	0.0674184	6.08791	5.33493	1
adck5	3.72538	5.84989	3.34367	0.0674638	6.08791	5.33493	1
nat15	3.72538	5.84978	3.34322	0.0674823	6.08791	5.33493	1
creg2	-1.63506	6.88195	3.34156	0.0675507	6.08791	7.14495	1
ednraa	1.42899	6.64953	3.34065	0.0675877	7.18798	6.33734	1
arfip2a	3.72132	5.85044	3.3397	0.0676271	6.0879	5.33493	1
gopc	3.72132	5.85017	3.33854	0.0676745	6.0879	5.33493	1
rpe	3.72132	5.85009	3.33823	0.0676873	6.0879	5.33493	1
azin1a	3.72132	5.84991	3.33743	0.0677202	6.0879	5.33493	1
cpsf1	3.72131	5.84966	3.33636	0.0677642	6.0879	5.33493	1
thumpd3	4.10608	5.71855	3.33155	0.0679626	6.28065	5.33493	1
lin37	3.71726	5.84988	3.33098	0.0679862	6.0879	5.33493	1
usp13	1.0073	7.66716	3.33085	0.0679918	7.86628	7.14495	1
pafah1b1a	1.36272	6.78731	3.33015	0.0680206	7.36867	6.5052	1
zgc:113274	4.10131	5.71883	3.32678	0.0681602	6.28065	5.33493	1
eif3ba	0.792551	9.54133	3.29995	0.0692821	10.023	9.34976	1
gpd1b	-1.41087	7.07985	3.28524	0.0699055	6.45082	7.50397	1
pxk	-3.70668	5.8502	3.27578	0.0703093	5.27993	6.1439	1
vtg4	-3.70669	5.85015	3.27557	0.0703185	5.27993	6.1439	1
hdhd5	-3.70669	5.85003	3.27506	0.0703405	5.27993	6.1439	1
tent5bb	-3.70669	5.85003	3.27506	0.0703405	5.27993	6.1439	1
si:ch211-194c3.5	-3.70669	5.84989	3.2745	0.0703642	5.27993	6.1439	1
ctbp2a	-3.7067	5.84962	3.27336	0.0704135	5.27993	6.1439	1
spns1	-3.7067	5.8495	3.27288	0.0704338	5.27993	6.1439	1
cwc22	-4.08753	5.71848	3.27206	0.070469	5.27993	6.33591	1
mmrn2a	1.37662	7.3318	3.2713	0.0705017	7.36068	6.4914	1
higd1a	1.21525	7.64954	3.26837	0.0706278	7.45122	6.6566	1
cd74a	-0.845382	8.55371	3.26213	0.0708971	7.80481	8.61917	1
ehmt1a	-3.69344	5.84962	3.25284	0.0712999	5.27993	6.14223	1
mycbp	-3.69344	5.84962	3.25284	0.0712999	5.27993	6.14223	1
klf2b	-3.69344	5.84955	3.25254	0.0713128	5.27993	6.14223	1
plekha1a	-3.69343	5.84944	3.25206	0.0713335	5.27993	6.14223	1
serpine2	-3.69343	5.8493	3.25151	0.0713579	5.27993	6.14223	1
slc20a1b	-3.69343	5.84929	3.25147	0.0713596	5.27993	6.14223	1
naxe	-3.69343	5.84929	3.25147	0.0713596	5.27993	6.14223	1
map7d1a	-3.69343	5.84924	3.25125	0.071369	5.27993	6.14223	1
nle1	-3.69343	5.84919	3.25103	0.0713787	5.27993	6.14223	1
gosr1	-3.69342	5.84899	3.25021	0.0714141	5.27993	6.14223	1
sh3d21	-3.69342	5.84871	3.24902	0.0714663	5.27993	6.14223	1
srsf2b	-4.07211	5.71783	3.24739	0.0715374	5.27993	6.33429	1
taf9	-3.6806	5.84904	3.23088	0.0722618	5.27993	6.14077	1
znf576.2	-3.68059	5.84891	3.23032	0.0722867	5.27993	6.14077	1
znf326	1.42754	6.72082	3.23015	0.0722942	7.18798	6.33895	1
stxbp6	-2.2982	6.02619	3.22986	0.0723068	5.60215	6.6566	1
eef2b	0.243605	11.7798	3.22952	0.0723219	11.9146	11.7529	1
proza	1.08319	7.45641	3.22721	0.072424	7.80487	7.03609	1
col1a2	-0.890294	8.8646	3.22059	0.0727175	7.92523	8.79302	1
cfl2	0.851383	7.92923	3.20677	0.0733343	8.13941	7.50642	1
antxr2b	-1.85012	6.0809	3.20633	0.0733539	5.86537	6.91978	1
rbm39a	-1.62949	7.02594	3.20359	0.0734768	6.0879	7.14103	1
cad	1.53397	6.57504	3.17431	0.0748048	6.98148	6.1439	1
dnajc11a	1.31614	7.13503	3.16673	0.075153	7.52915	6.6566	1
u2surp	-1.2298	7.23525	3.15893	0.0755124	6.74041	7.73174	1
luc7l3	-1.31445	6.75452	3.15487	0.0757007	6.45066	7.42705	1
pawr	1.53542	6.61229	3.15331	0.075773	6.98148	6.14077	1
hnrnpaba	-0.731723	8.0933	3.15188	0.0758397	7.86628	8.58118	1
psmc1a	1.53334	6.61207	3.14541	0.0761411	6.98148	6.1439	1
cited4b	-1.37878	6.61176	3.14189	0.0763054	6.28083	7.24137	1
zswim8	1.53374	6.64983	3.1137	0.0776364	6.98148	6.1439	1
sgcb	-1.033	7.55614	3.10709	0.0779519	6.98148	7.86183	1
agpat3	0.943439	7.64922	3.09495	0.0785356	7.92517	7.24262	1
leng8	0.852104	7.68515	3.08292	0.0791183	8.1393	7.50278	1
gata1a	2.3529	5.97088	3.07765	0.0793753	6.60287	5.65641	1
pfn2	-0.823513	8.33855	3.07723	0.0793958	7.60323	8.38264	1
mylk2	-0.750031	7.98527	3.07716	0.079399	7.74074	8.46471	1
anxa11b	-1.03258	7.53594	3.07105	0.0796978	6.98148	7.86073	1
setd1ba	3.7312	5.78646	3.07092	0.0797042	6.08811	5.33493	1
spryd3	3.73121	5.78599	3.06881	0.0798076	6.08811	5.33493	1
vps18	3.73121	5.78593	3.06856	0.0798201	6.08811	5.33493	1
ythdf3	3.72582	5.78622	3.06226	0.0801301	6.08791	5.33493	1
eral1	3.72583	5.78608	3.06164	0.0801605	6.08791	5.33493	1
ddi2	3.72583	5.78594	3.06099	0.0801926	6.08791	5.33493	1
heatr5a	3.72583	5.78594	3.06099	0.0801926	6.08791	5.33493	1
sema4c	3.72583	5.78564	3.05964	0.0802597	6.08791	5.33493	1
clasp1a	3.72583	5.78554	3.05921	0.0802808	6.08791	5.33493	1
zgc:112980	3.72089	5.78607	3.0548	0.080499	6.0879	5.33493	1
ptgdsb.2	3.72089	5.78581	3.05363	0.0805569	6.0879	5.33493	1
pdlim3b	3.72089	5.78581	3.05363	0.0805569	6.0879	5.33493	1
itgb5	3.72089	5.78581	3.05363	0.0805569	6.0879	5.33493	1
nvl	3.72089	5.78568	3.05301	0.0805876	6.0879	5.33493	1
cybrd1	3.72089	5.78562	3.05276	0.0806002	6.0879	5.33493	1
btd	3.72089	5.78556	3.05249	0.0806133	6.0879	5.33493	1
frem1a	3.71594	5.78553	3.04557	0.0809578	6.0879	5.33493	1
atpaf1	1.35685	6.94276	3.03108	0.0816837	7.36867	6.50817	1
tsc1a	1.17461	7.1863	3.02707	0.0818858	7.74074	6.92123	1
slc25a39	1.71327	6.41418	3.01715	0.0823882	6.74041	5.92041	1
cul1a	1.71332	6.37074	3.01619	0.0824368	6.74041	5.91892	1
lpar6a	1.71327	6.37151	3.01606	0.0824434	6.74041	5.92041	1
pfkfb4a	1.71258	6.41473	3.01533	0.0824809	6.74041	5.92215	1
tbc1d15	1.71327	6.45637	3.01434	0.0825311	6.74041	5.92041	1
fam131c	1.71253	6.3723	3.01414	0.082541	6.74041	5.92215	1
ube2kb	1.71357	6.3274	3.01085	0.0827088	6.74041	5.91892	1
crim1	1.71351	6.3269	3.01054	0.0827248	6.74041	5.91892	1
cul4a	1.71352	6.49659	3.00889	0.0828088	6.74041	5.91892	1
aqr	-3.7082	5.78613	3.00263	0.0831295	5.27993	6.1439	1
klhl24b	-3.7082	5.78594	3.00179	0.0831727	5.27993	6.1439	1
nudc	-3.7082	5.7859	3.0016	0.0831822	5.27993	6.1439	1
krt4	-0.781889	8.2551	3.00131	0.0831974	7.67355	8.4167	1
mylipa	1.18881	7.30419	3.00112	0.0832069	7.60323	6.79633	1
tubb2b	-3.70821	5.78575	3.00098	0.0832144	5.27993	6.1439	1
zbtb11	-3.70821	5.78575	3.00098	0.0832144	5.27993	6.1439	1
sh3bp4a	-3.70821	5.78575	3.00098	0.0832144	5.27993	6.1439	1
ephb3a	-3.70821	5.78569	3.00072	0.0832275	5.27993	6.1439	1
parp12a	-3.70821	5.78555	3.00009	0.0832598	5.27993	6.1439	1
naxd	1.71363	6.28086	2.99568	0.083487	6.74041	5.91892	1
errfi1a	1.71352	6.28135	2.99552	0.0834953	6.74041	5.92041	1
cmc1	1.5335	6.7535	2.99347	0.083601	6.98148	6.1439	1
fxyd1	-0.798131	9.25089	2.98862	0.0838514	8.74081	9.56498	1
tp53bp2a	-1.48552	6.53697	2.98547	0.0840147	6.0879	7.03738	1
c1qc	-3.69218	5.7856	2.97839	0.084383	5.27993	6.14223	1
tesca	-3.69218	5.78548	2.97789	0.0844091	5.27993	6.14223	1
gbp1	-3.69218	5.78548	2.97786	0.0844107	5.27993	6.14223	1
txn	-3.69217	5.78529	2.97705	0.0844532	5.27993	6.14223	1
hmgcs1	-3.69217	5.78529	2.97705	0.0844532	5.27993	6.14223	1
zgc:198241	-3.69217	5.7852	2.97667	0.0844732	5.27993	6.14223	1
xrn1	-3.69217	5.78509	2.97616	0.0844993	5.27993	6.14223	1
calub	-3.69217	5.78504	2.97595	0.0845106	5.27993	6.14223	1
mrpl9	-3.69217	5.78489	2.97532	0.0845434	5.27993	6.14223	1
tnfrsfa	2.0954	6.49589	2.96982	0.0848312	6.45082	5.65641	1
dnajc8	2.095	6.32565	2.96925	0.0848611	6.45066	5.65641	1
acad9	2.09475	6.32647	2.96867	0.0848917	6.45066	5.65793	1
rap2c	1.71336	6.23369	2.96349	0.0851638	6.74028	5.91892	1
scarb2a	2.09661	6.28052	2.96329	0.0851747	6.45082	5.65612	1
kansl3	1.71221	6.61225	2.96148	0.0852696	6.74041	5.92215	1
rnf213b	-1.31163	6.85014	2.95906	0.0853977	6.45082	7.42455	1
fbxl4	-3.67656	5.78527	2.95595	0.0855623	5.27993	6.14077	1
c1qtnf1	-3.67654	5.78489	2.95428	0.0856503	5.27993	6.14077	1
rnf145b	2.09513	6.57439	2.95318	0.0857088	6.45082	5.65793	1
tbx5a	-1.48577	6.61131	2.9434	0.086229	6.0879	7.03738	1
cyth1b	2.09577	6.23376	2.94202	0.0863026	6.45082	5.65641	1
synj2bp	1.71318	6.65023	2.9405	0.086384	6.74041	5.92041	1
med19a	2.09517	6.2332	2.93979	0.0864218	6.45066	5.65641	1
tufm	1.00532	7.59454	2.93603	0.0866233	7.74074	7.03868	1
marcksl1a	-1.03814	7.62977	2.93278	0.0867979	6.86598	7.72716	1
fnbp4	1.17132	7.08304	2.93152	0.0868656	7.74074	6.92123	1
fdps	4.11086	5.64846	2.92529	0.0872015	6.28065	5.33493	1
mief2	4.10564	5.64833	2.91876	0.0875553	6.28065	5.33493	1
znf292b	1.71341	6.68483	2.91573	0.0877195	6.74041	5.92041	1
zfand5b	-1.48616	6.64937	2.91373	0.0878286	6.08791	7.03868	1
mxb	-4.12057	5.64895	2.91113	0.0879702	5.27993	6.33895	1
cyr61	2.09588	6.18451	2.90349	0.0883879	6.45082	5.65641	1
taf13	2.09532	6.18428	2.90146	0.0884996	6.45066	5.65641	1
rnf11a	2.09493	6.18472	2.90108	0.08852	6.45082	5.65793	1
vti1a	2.09378	6.18494	2.89794	0.0886926	6.45066	5.65793	1
acsl1b	0.75524	8.9222	2.89497	0.0888566	9.32585	8.70004	1
got2a	0.6165	10.2787	2.89359	0.0889323	10.3368	9.82361	1
ybx1	0.14866	12.4906	2.89249	0.0889932	12.5224	12.4546	1
epdl1	1.18802	7.23359	2.89189	0.0890266	7.60316	6.79633	1
lgmn	-1.26032	7.10746	2.88279	0.0895305	6.60272	7.58261	1
zgc:172270	1.43409	7.05437	2.87426	0.0900063	7.18807	6.33286	1
cast	0.755078	8.25902	2.86969	0.0902624	8.36888	7.79605	1
si:ch211-244b2.3	-4.08762	5.64808	2.86953	0.0902712	5.27993	6.33591	1
gsna	1.24636	6.68573	2.86113	0.0907438	7.2811	6.50817	1
gab1	1.71249	6.75318	2.85337	0.0911826	6.74028	5.92041	1
mpi	-4.07078	5.6476	2.84834	0.0914684	5.27993	6.33429	1
lpcat4	-4.07078	5.6476	2.84834	0.0914684	5.27993	6.33429	1
pcdh1g1	-4.07699	5.64577	2.84392	0.0917203	5.27993	6.33015	1
psmb1	-1.66541	6.41487	2.8394	0.0919784	5.86538	6.79768	1
ctsa	-1.6655	6.45705	2.837	0.0921161	5.86537	6.79768	1
LOC103910026	-1.66494	6.37132	2.8366	0.0921391	5.86538	6.79485	1
ckmb	-1.66478	6.45565	2.83454	0.0922574	5.86538	6.79351	1
sms	-1.66431	6.37032	2.8342	0.0922767	5.86538	6.79068	1
cog3	2.0956	6.13425	2.83355	0.0923139	6.45066	5.65641	1
sarnp	2.0956	6.134	2.83312	0.0923389	6.45066	5.65641	1
lgals9l3	-1.66556	6.32651	2.83284	0.0923549	5.86537	6.79768	1
ube4b	-1.66544	6.3268	2.83249	0.0923751	5.86538	6.79768	1
mrpl34	1.09855	7.53722	2.8316	0.0924261	7.52915	6.79485	1
rgl1	-2.05015	6.45606	2.83141	0.0924372	5.60215	6.50817	1
cst14a.2	-2.04967	6.37124	2.83085	0.0924696	5.60215	6.50661	1
sbf1	-2.04957	6.37105	2.83057	0.0924856	5.60215	6.5052	1
cdh17	-4.05418	5.64721	2.82798	0.0926345	5.27993	6.33286	1
sec61g	0.738332	8.97258	2.82723	0.0926781	9.47131	8.85887	1
dap3	-2.04969	6.32592	2.82692	0.0926961	5.60215	6.50661	1
serpinh1a	-2.04969	6.32588	2.82691	0.0926965	5.60215	6.50661	1
serpina10a	-0.800058	7.91212	2.82677	0.0927049	7.45114	8.19521	1
arpc4l	-2.04956	6.32591	2.82656	0.0927166	5.60215	6.5052	1
stk35l	-2.0495	6.32611	2.82643	0.0927245	5.60215	6.5052	1
calua	-2.04973	6.28088	2.81788	0.0932194	5.60215	6.50661	1
pitrm1	-2.04953	6.28027	2.81716	0.0932611	5.60215	6.5052	1
matr3l1.1	-1.6653	6.57426	2.80744	0.0938282	5.86538	6.79633	1
ckmt2b	0.752289	9.32882	2.80372	0.0940457	9.72445	9.09186	1
nanos1	1.71301	6.13434	2.79961	0.0942873	6.74041	5.92041	1
pdap1a	-2.04999	6.23288	2.79914	0.094315	5.60215	6.50661	1
tent4b	-2.04947	6.23293	2.79778	0.094395	5.60215	6.5052	1
cse1l	-2.04931	6.23355	2.79768	0.094401	5.60215	6.5052	1
lcp1	-2.04868	6.23177	2.79475	0.0945736	5.60215	6.50364	1
pbrm1l	1.71065	6.13454	2.79301	0.094676	6.74041	5.92215	1
appbp2	-1.66617	6.23387	2.79164	0.0947573	5.86537	6.79768	1
tomm70a	-1.666	6.23385	2.79108	0.0947906	5.86538	6.79768	1
angptl4	-1.66533	6.61177	2.79007	0.0948503	5.86538	6.79633	1
aldh9a1a.1	0.714889	8.54661	2.78914	0.094905	8.805	8.23964	1
reep5	1.53546	6.94105	2.78648	0.0950627	6.98148	6.14244	1
iars	-1.6648	6.23292	2.78611	0.095085	5.86538	6.79485	1
acox1	3.19194	6.13463	2.772	0.0959264	5.86538	5.33493	1
gskip	-1.31185	7.0819	2.77149	0.0959569	6.45082	7.42455	1
park7	-1.37949	6.87988	2.76828	0.0961492	6.28065	7.24262	1
reps1	3.73238	5.71905	2.76819	0.0961548	6.08811	5.33493	1
LOC100001344	3.73238	5.71894	2.76768	0.0961856	6.08811	5.33493	1
tmem230b	3.73238	5.71875	2.76683	0.0962368	6.08811	5.33493	1
igbp1	3.73238	5.71875	2.76683	0.0962368	6.08811	5.33493	1
sgce	-2.04999	6.18385	2.76216	0.0965177	5.60215	6.50661	1
hint2	3.72623	5.71914	2.76114	0.0965797	6.08791	5.33493	1
aldh18a1	-2.04937	6.18431	2.76097	0.0965897	5.60215	6.5052	1
creb3l3l	-1.3777	6.88018	2.76072	0.0966048	6.28065	7.24137	1
s1pr5a	3.72623	5.719	2.76051	0.0966174	6.08791	5.33493	1
zgc:153993	3.72623	5.71886	2.75989	0.096655	6.08791	5.33493	1
wdr48b	3.72623	5.7187	2.75917	0.0966985	6.08791	5.33493	1
tial1	-1.30888	7.08113	2.75875	0.0967239	6.45082	7.42325	1
ift57	3.72623	5.7186	2.75873	0.0967249	6.08791	5.33493	1
cilp	3.72623	5.7186	2.75873	0.0967249	6.08791	5.33493	1
setd6	3.72623	5.71855	2.75852	0.0967374	6.08791	5.33493	1
cap2	-1.30607	7.10754	2.75403	0.0970099	6.45082	7.42205	1
tnfaip8l1	3.72051	5.71888	2.75316	0.0970624	6.0879	5.33493	1
rasgef1ba	3.72051	5.71868	2.75231	0.097114	6.0879	5.33493	1
lhpp	3.72051	5.71868	2.75231	0.097114	6.0879	5.33493	1
mcl1a	0.661846	8.30711	2.75224	0.0971186	8.70771	8.19521	1
adgra3	3.72051	5.71862	2.75203	0.0971313	6.0879	5.33493	1
rnpc3	3.72051	5.71847	2.75138	0.0971703	6.0879	5.33493	1
txlng	3.72051	5.71828	2.75053	0.097222	6.0879	5.33493	1
pip5k1ab	3.71479	5.71889	2.74644	0.0974711	6.0879	5.33493	1
rdh10b	3.71479	5.71875	2.74582	0.0975091	6.0879	5.33493	1
cbwd	3.71478	5.71835	2.74404	0.0976175	6.0879	5.33493	1
wdr45b	-1.3015	6.99817	2.74024	0.0978502	6.45082	7.41835	1
nceh1a	3.19194	6.0804	2.73935	0.0979046	5.86538	5.33493	1
pdgfra	3.19098	6.08098	2.73847	0.0979585	5.86537	5.33493	1
stau2	0.505768	10.6267	2.73809	0.0979816	10.6994	10.285	1
irf9	-3.16848	6.28089	2.7325	0.0983254	5.27993	5.91892	1
srsf10b	-3.72748	5.71901	2.73221	0.0983433	5.27993	6.14536	1
lzic	-3.72748	5.71896	2.732	0.0983558	5.27993	6.14536	1
arl4ab	-1.37827	7.232	2.73156	0.0983831	6.28065	7.24137	1
apeh	-1.66374	6.18417	2.72704	0.0986619	5.86538	6.79351	1
rhocb	2.09812	6.08154	2.72525	0.0987725	6.45082	5.65641	1
eaf1	2.09609	6.08162	2.72009	0.0990925	6.45066	5.65641	1
myom2a	-0.703096	8.75559	2.71902	0.0991587	8.56681	9.29465	1
kmt5b	2.09412	6.08255	2.7177	0.0992412	6.45082	5.65793	1
ctsk	-1.6646	6.71851	2.71484	0.0994188	5.86538	6.79485	1
khdrbs1a	-0.734288	8.85158	2.71401	0.0994706	8.49083	9.24461	1
phf23b	2.09296	6.08163	2.71212	0.0995885	6.45066	5.65793	1
golga7	1.29529	6.53684	2.71207	0.0995918	7.08852	6.33591	1
ube2ib	1.2952	6.53645	2.71189	0.0996029	7.08852	6.33591	1
mrps2	1.2952	6.53659	2.71183	0.0996068	7.08852	6.33591	1
f11r.1	-3.70954	5.71901	2.71096	0.0996611	5.27993	6.1439	1
cyp46a1.4	-3.70954	5.71882	2.71015	0.0997115	5.27993	6.1439	1
itprip	-3.70954	5.71873	2.70975	0.0997367	5.27993	6.1439	1
tigarb	-3.70954	5.71867	2.70953	0.0997504	5.27993	6.1439	1
lamb1a	-1.4817	6.81694	2.70943	0.0997565	6.08811	7.03468	1
zgc:193505	-3.70954	5.71861	2.70925	0.0997677	5.27993	6.1439	1
rnaset2	-3.70954	5.71856	2.70905	0.0997803	5.27993	6.1439	1
atf6	-3.70955	5.71827	2.70781	0.0998583	5.27993	6.1439	1
arhgap17b	-3.16883	6.13333	2.70064	0.100308	5.27993	5.92041	1
scrib	-2.05084	6.13318	2.69796	0.100477	5.60215	6.50661	1
nlk2	1.29634	6.57434	2.696	0.1006	7.08852	6.33286	1
sik1	-2.04919	6.13352	2.69425	0.100711	5.60215	6.5052	1
skib	3.19195	6.02714	2.69008	0.100975	5.86538	5.33493	1
ptpn11b	3.19195	6.02613	2.68897	0.101045	5.86538	5.33493	1
cobl	-2.04726	6.13276	2.68777	0.101121	5.60215	6.50364	1
fcf1	-3.69106	5.71835	2.68636	0.101211	5.27993	6.14223	1
mgll	-3.69106	5.71821	2.68574	0.10125	5.27993	6.14223	1
elp6	-3.69106	5.71821	2.68574	0.10125	5.27993	6.14223	1
ubl3b	-3.69106	5.7181	2.68526	0.101281	5.27993	6.14223	1
znf1024	-3.69106	5.71795	2.68464	0.10132	5.27993	6.14223	1
zgc:153317	-3.69105	5.71781	2.68402	0.10136	5.27993	6.14223	1
smarca1	-2.04558	6.13194	2.68205	0.101485	5.60215	6.50224	1
vat1	-0.758615	7.88181	2.67053	0.102222	7.52915	8.24667	1
parp16	-3.16887	6.08121	2.67037	0.102232	5.27993	5.92041	1
arf6b	-3.16887	6.08094	2.67017	0.102245	5.27993	5.92041	1
2023-03-02	-3.16887	6.08074	2.67003	0.102254	5.27993	5.92041	1
nol10	-3.16887	6.08044	2.66982	0.102268	5.27993	5.92041	1
marcksl1b	-0.83642	7.75408	2.66605	0.10251	7.28119	8.04033	1
fam76b	-3.16581	6.08037	2.66567	0.102535	5.27993	5.91892	1
rab1ab	1.29521	6.61276	2.66441	0.102616	7.08852	6.33591	1
eml2	-3.67294	5.718	2.66379	0.102656	5.27993	6.14077	1
zgc:175264	-3.67294	5.71796	2.66359	0.102669	5.27993	6.14077	1
si:ch211-165i18.2	-3.67293	5.71781	2.66297	0.102709	5.27993	6.14077	1
zgc:63569	-3.67293	5.71781	2.66297	0.102709	5.27993	6.14077	1
kalrnb	-3.67293	5.71775	2.66269	0.102727	5.27993	6.14077	1
sfrp1b	-3.67293	5.71775	2.66269	0.102727	5.27993	6.14077	1
sp1	-3.67292	5.7176	2.66207	0.102767	5.27993	6.14077	1
wwp2	-1.48742	6.88062	2.65889	0.102972	6.0879	7.03738	1
atf7ip	1.21874	7.13384	2.65298	0.103356	7.45114	6.65508	1
si:dkey-7j14.6	0.87353	7.70321	2.64602	0.10381	7.86628	7.24387	1
pcmtd1	-1.66826	6.13444	2.64543	0.103848	5.86537	6.79768	1
calm1a	-0.758796	7.78824	2.64329	0.103988	7.52923	8.24667	1
unc119b	1.71585	6.0815	2.64053	0.104169	6.74041	5.91892	1
slc37a2	-1.6667	6.13397	2.63937	0.104245	5.86537	6.79633	1
thrap3b	1.29449	6.64953	2.6292	0.104914	7.08852	6.33734	1
ctrb1	1.09768	7.39549	2.62895	0.104931	7.52915	6.79768	1
si:dkey-276j7.1	-1.66278	6.1331	2.62478	0.105207	5.86538	6.79351	1
tapbp.1	-1.66224	6.13345	2.62394	0.105263	5.86538	6.79351	1
fryl	-1.13305	6.90999	2.61772	0.105676	6.74041	7.6538	1
nr3c1	1.21511	7.05474	2.61548	0.105825	7.45122	6.65797	1
serpinb1l1	3.19196	5.96973	2.61481	0.10587	5.86538	5.33493	1
hint1	-1.48295	6.91155	2.61431	0.105904	6.08811	7.03609	1
mrtfab	-3.16387	6.0256	2.61406	0.10592	5.27993	5.91892	1
psmd4b	3.1895	5.96997	2.61199	0.106059	5.86537	5.33493	1
surf6	-2.05471	6.08187	2.6014	0.10677	5.60215	6.50817	1
zhx3	-2.05473	6.08137	2.60019	0.106851	5.60215	6.50817	1
rdh14b	-2.05371	6.08199	2.59922	0.106917	5.60215	6.50817	1
fgfr4	1.29512	6.68414	2.59585	0.107144	7.08842	6.33429	1
tsfm	-2.31145	5.91169	2.58432	0.107927	5.60215	6.65949	1
antxr2a	-2.04486	6.08012	2.57212	0.108762	5.60215	6.50364	1
sox4b	-3.17737	5.97097	2.56264	0.109416	5.27993	5.92215	1
faxdc2	-3.17739	5.97058	2.5621	0.109453	5.27993	5.92215	1
ivns1abpa	1.29582	6.71932	2.55855	0.109699	7.08842	6.33591	1
ston1	2.09692	6.02656	2.55028	0.110275	6.45066	5.65641	1
trub2	-3.16901	5.96968	2.54974	0.110312	5.27993	5.92041	1
cry1ba	0.935597	7.47726	2.54965	0.110318	7.80487	7.14241	1
rhobtb2a	-3.16901	5.96951	2.54949	0.11033	5.27993	5.92041	1
zc3h7a	-3.16901	5.96949	2.54947	0.110331	5.27993	5.92041	1
sgk1	-3.16901	5.96927	2.54914	0.110354	5.27993	5.92041	1
itm2bb	-0.893509	7.49656	2.54563	0.1106	7.18807	7.98103	1
gpc4	-3.16125	5.96957	2.53975	0.111012	5.27993	5.91892	1
caprin1a	-3.16123	5.96908	2.53899	0.111066	5.27993	5.91892	1
gnl3l	-1.24626	6.37202	2.52785	0.111852	6.28065	7.14633	1
atp5if1a	0.64716	8.16148	2.52625	0.111966	8.52934	8.03923	1
si:ch1073-291c23.2	1.00458	7.49589	2.52455	0.112087	7.60316	6.91846	1
map4k2	3.19548	5.91177	2.51908	0.112476	5.86538	5.33493	1
stk17b	3.19549	5.91143	2.51843	0.112522	5.86538	5.33493	1
gdi1	-2.28458	5.91052	2.51776	0.112571	5.60215	6.65508	1
atp2b1a	3.19197	5.91164	2.5145	0.112803	5.86538	5.33493	1
zgc:110158	3.19197	5.91158	2.51438	0.112812	5.86538	5.33493	1
polr2m	3.19197	5.91144	2.5141	0.112832	5.86538	5.33493	1
bcl7ba	3.19197	5.91141	2.51404	0.112836	5.86538	5.33493	1
lsg1	3.19197	5.9113	2.51385	0.11285	5.86538	5.33493	1
si:ch211-206k20.5	3.19197	5.91119	2.51363	0.112866	5.86538	5.33493	1
btbd6b	3.19197	5.91116	2.51357	0.11287	5.86538	5.33493	1
dock1	3.19197	5.91095	2.51317	0.112899	5.86538	5.33493	1
tnnc1b	-0.657986	7.68354	2.51255	0.112943	7.92523	8.57489	1
dnase2	3.18844	5.91138	2.50965	0.113151	5.86537	5.33493	1
sh3gl3b	3.18844	5.91114	2.50919	0.113184	5.86537	5.33493	1
spsb4a	3.18844	5.91105	2.50901	0.113197	5.86537	5.33493	1
mhc2b	3.18843	5.91064	2.50821	0.113255	5.86537	5.33493	1
gys1	0.925099	7.68292	2.50308	0.113624	7.67355	7.03468	1
uqcrh	0.766078	8.62254	2.48797	0.114719	8.45134	7.86407	1
gmpr	0.734844	9.01365	2.48614	0.114853	9.13945	8.54403	1
tnip1	1.24579	6.94265	2.48468	0.11496	7.2812	6.50817	1
ranbp3b	-1.24574	6.5742	2.48265	0.115108	6.28065	7.14241	1
rhbdf1a	-1.24512	6.5738	2.48031	0.11528	6.28065	7.14103	1
fn1b	-0.704914	9.79163	2.47852	0.115411	8.86643	9.61185	1
kcnh6a	-1.1935	6.78491	2.47275	0.115835	6.45082	7.3326	1
klf11b	1.29489	6.78665	2.4711	0.115957	7.08852	6.33591	1
dnase1l4.2	-3.18088	5.91156	2.46764	0.116212	5.27993	5.92215	1
dmap1	-3.1809	5.91128	2.46713	0.11625	5.27993	5.92215	1
dynll2b	-3.1809	5.91118	2.46695	0.116263	5.27993	5.92215	1
igfbp1a	3.73336	5.64858	2.46465	0.116433	6.08811	5.33493	1
ndufa7	1.25306	7.05491	2.46397	0.116484	7.28119	6.50364	1
alox5a	3.73336	5.64839	2.46387	0.116492	6.08811	5.33493	1
rpl24	0.396828	10.9309	2.4608	0.116719	11.1395	10.83	1
zdhhc17	3.72656	5.64838	2.45691	0.117009	6.08791	5.33493	1
pacs2	3.72656	5.64838	2.45691	0.117009	6.08791	5.33493	1
dnm3a	3.72656	5.64834	2.45673	0.117022	6.08791	5.33493	1
ogfod1	-3.16912	5.91161	2.4531	0.117293	5.27993	5.92041	1
tspan4b	0.716982	8.01421	2.45294	0.117305	8.18822	7.65967	1
zgc:92744	0.717717	7.81802	2.45212	0.117366	8.18821	7.65494	1
trnt1	-3.16912	5.91106	2.45207	0.11737	5.27993	5.92041	1
slc47a2.2	-3.16912	5.91099	2.45194	0.117379	5.27993	5.92041	1
sap30bp	-3.16912	5.91091	2.4518	0.11739	5.27993	5.92041	1
tp53rk	-3.16912	5.91082	2.45162	0.117403	5.27993	5.92041	1
mbd1b	3.72019	5.64847	2.45089	0.117458	6.0879	5.33493	1
commd9	3.72019	5.64847	2.45089	0.117458	6.0879	5.33493	1
aimp1	-1.03716	7.30189	2.45078	0.117466	6.86597	7.72597	1
ppp2r5eb	-3.16912	5.91036	2.45078	0.117467	5.27993	5.92041	1
spryd7b	3.72019	5.64821	2.44981	0.117539	6.0879	5.33493	1
enpp5	3.72019	5.64821	2.44981	0.117539	6.0879	5.33493	1
tnrc6a	3.72019	5.64806	2.44921	0.117584	6.0879	5.33493	1
tsnax	3.72019	5.64806	2.44921	0.117584	6.0879	5.33493	1
ist1	-2.05747	6.02762	2.4473	0.117728	5.60215	6.50817	1
erlin1	-2.05748	6.02746	2.44679	0.117766	5.60215	6.50817	1
ryr1b	-1.16304	6.94213	2.44644	0.117792	6.60287	7.50642	1
pip5k1bb	-2.05749	6.02722	2.446	0.117824	5.60215	6.50817	1
arpc5la	-2.0558	6.02758	2.44326	0.11803	5.60215	6.50817	1
znf800b	3.71381	5.64809	2.4429	0.118058	6.0879	5.33493	1
fbxo25	-2.0558	6.02746	2.44284	0.118063	5.60215	6.50817	1
vps35	1.29768	6.81831	2.44144	0.118168	7.08842	6.33429	1
mcm5	-3.15799	5.91077	2.43807	0.118422	5.27993	5.91892	1
tmsb1	-3.15799	5.91077	2.43807	0.118422	5.27993	5.91892	1
ldb1a	-3.15799	5.9107	2.43795	0.118431	5.27993	5.91892	1
pofut1	-3.7306	5.64846	2.43641	0.118547	5.27993	6.14536	1
tmem128	-3.7306	5.64846	2.43641	0.118547	5.27993	6.14536	1
map3k7	-2.05291	6.02747	2.43598	0.11858	5.60215	6.50661	1
mxe	-2.05293	6.02705	2.43457	0.118687	5.60215	6.50661	1
idh1	1.36893	6.41498	2.43187	0.118891	6.86598	6.1439	1
cstf3	1.36876	6.41463	2.43127	0.118936	6.86598	6.1439	1
exoc1	1.36959	6.45594	2.43113	0.118947	6.86598	6.14077	1
spock3	0.584281	10.1924	2.42756	0.119218	10.2473	9.76503	1
bag3	-1.1657	7.13428	2.42285	0.119577	6.60287	7.50761	1
anapc16	-2.04863	6.02628	2.42194	0.119647	5.60215	6.5052	1
nr1d2b	0.705633	8.30568	2.41838	0.119919	8.32577	7.79716	1
atf6b	-2.04693	6.02606	2.41724	0.120006	5.60215	6.5052	1
LOC561325	-3.71066	5.64846	2.41646	0.120066	5.27993	6.1439	1
baiap2a	-3.71066	5.64846	2.41646	0.120066	5.27993	6.1439	1
ubxn8	-3.71066	5.64846	2.41646	0.120066	5.27993	6.1439	1
galcb	-3.71066	5.64846	2.41646	0.120066	5.27993	6.1439	1
mrpl10	-3.71066	5.64846	2.41646	0.120066	5.27993	6.1439	1
znhit1	-3.71066	5.6482	2.41541	0.120146	5.27993	6.1439	1
bub3	-3.71066	5.6482	2.41541	0.120146	5.27993	6.1439	1
smim8	1.36971	6.53532	2.41509	0.120171	6.86598	6.14077	1
qars	-3.71066	5.64806	2.41483	0.120191	5.27993	6.1439	1
ctdnep1a	-3.71066	5.64806	2.41483	0.120191	5.27993	6.1439	1
cxxc1b	-3.71066	5.64806	2.41483	0.120191	5.27993	6.1439	1
zgc:113531	-3.71066	5.64806	2.41483	0.120191	5.27993	6.1439	1
sos2	-3.71066	5.64806	2.41483	0.120191	5.27993	6.1439	1
ninl	-3.71021	5.64817	2.41478	0.120195	5.27993	6.14369	1
mrpl45	1.36864	6.5363	2.41137	0.120457	6.86598	6.1439	1
snx27a	-2.04234	6.02614	2.4067	0.120817	5.60215	6.50364	1
ccdc187	1.09779	6.91205	2.40578	0.120887	7.52915	6.79485	1
otub1b	1.36961	6.57479	2.39995	0.121339	6.86598	6.14223	1
bag6	1.36891	6.57561	2.39749	0.12153	6.86598	6.1439	1
slmapb	-2.03802	6.02606	2.39646	0.12161	5.60215	6.50224	1
mpeg1.1	-3.69012	5.64778	2.39323	0.121861	5.27993	6.14223	1
prr5a	-3.69012	5.64778	2.39323	0.121861	5.27993	6.14223	1
trim13	-3.69012	5.64778	2.39323	0.121861	5.27993	6.14223	1
zfand4	-3.69012	5.64759	2.39248	0.12192	5.27993	6.14223	1
pnpla7a	-3.69012	5.64759	2.39248	0.12192	5.27993	6.14223	1
them4	3.1967	5.85022	2.3902	0.122098	5.86538	5.33493	1
nubp1	3.19671	5.84995	2.38959	0.122146	5.86538	5.33493	1
kif7	3.19671	5.84983	2.38931	0.122168	5.86538	5.33493	1
tfdp2	3.19671	5.84971	2.38905	0.122188	5.86538	5.33493	1
khsrp	-1.2436	6.68316	2.3881	0.122262	6.28083	7.14103	1
letm1	1.29379	6.85087	2.38808	0.122264	7.08842	6.33734	1
stom	1.29355	6.85044	2.38771	0.122292	7.08842	6.33591	1
thoc3	3.19198	5.84992	2.38405	0.12258	5.86538	5.33493	1
quo	3.19198	5.84983	2.38384	0.122596	5.86538	5.33493	1
pex13	3.19198	5.84978	2.38372	0.122605	5.86538	5.33493	1
aldh1a2	-1.04665	7.39169	2.38043	0.122864	6.74041	7.58386	1
nucb2a	0.773886	7.77038	2.37993	0.122903	7.98176	7.42205	1
larp6a	1.36876	6.61213	2.37877	0.122994	6.86598	6.1439	1
vgll4b	3.18725	5.84983	2.37838	0.123025	5.86537	5.33493	1
camlg	3.18725	5.84967	2.37802	0.123053	5.86537	5.33493	1
socs5a	1.36844	6.23417	2.37686	0.123145	6.86598	6.1439	1
ptpn11a	3.18723	5.84893	2.37632	0.123188	5.86537	5.33493	1
pigr	-3.6699	5.64759	2.3726	0.123481	5.27993	6.14077	1
accs	-3.6699	5.64759	2.3726	0.123481	5.27993	6.14077	1
LOC792137	-3.66989	5.64738	2.37174	0.123549	5.27993	6.14077	1
stmn1b	-3.66989	5.64733	2.37156	0.123563	5.27993	6.14077	1
lrsam1	-3.66989	5.64733	2.37156	0.123563	5.27993	6.14077	1
zgc:101858	-3.66989	5.64733	2.37156	0.123563	5.27993	6.14077	1
neo1a	-3.66989	5.64719	2.37099	0.123609	5.27993	6.14077	1
eef1a1a	-3.66989	5.64719	2.37099	0.123609	5.27993	6.14077	1
bzw2	-0.741394	8.05436	2.36141	0.124369	7.45114	8.14301	1
fgfr1op2	-1.24596	6.71875	2.35954	0.124519	6.28065	7.14368	1
casq1b	0.773391	7.73603	2.35836	0.124613	7.9817	7.42205	1
chchd1	-1.24421	6.71757	2.35412	0.124953	6.28065	7.14103	1
zgc:153867	-0.822707	7.71922	2.35352	0.125	7.18807	7.9216	1
rcc1l	-3.18479	5.85032	2.34627	0.125583	5.27993	5.92215	1
alad	-3.1848	5.8502	2.34602	0.125603	5.27993	5.92215	1
pdss1	-3.1848	5.8502	2.34602	0.125603	5.27993	5.92215	1
mrps28	-3.18481	5.85002	2.34562	0.125635	5.27993	5.92215	1
rnasekb	1.29062	6.8822	2.34241	0.125894	7.08842	6.33895	1
col1a1a	-0.770516	8.82625	2.33883	0.126184	7.86628	8.61917	1
tln2a	1.36945	6.68299	2.3333	0.126633	6.86598	6.14223	1
narfl	2.10038	5.9703	2.33319	0.126642	6.45082	5.65641	1
wdr44	2.10039	5.9701	2.33234	0.126711	6.45082	5.65641	1
myl9a	-0.699021	8.91151	2.33193	0.126745	8.4513	9.17025	1
s100a10a	2.09816	5.97031	2.32824	0.127045	6.45066	5.65641	1
arhgap36	-3.16924	5.85014	2.32786	0.127077	5.27993	5.92041	1
atp2b4	-3.16924	5.85001	2.32756	0.127101	5.27993	5.92041	1
apex1	-3.16924	5.84994	2.32743	0.127112	5.27993	5.92041	1
rnf41	-3.16924	5.84994	2.32743	0.127112	5.27993	5.92041	1
slc48a1b	-3.16924	5.84982	2.32715	0.127134	5.27993	5.92041	1
cd82b	-3.16924	5.84968	2.32684	0.12716	5.27993	5.92041	1
cyhr1	-3.16924	5.84914	2.32565	0.127257	5.27993	5.92041	1
tsc22d2	2.09621	5.97037	2.32428	0.127369	6.45066	5.65641	1
rnls	2.09621	5.97024	2.32372	0.127415	6.45066	5.65641	1
vegfab	1.29464	7.21027	2.31859	0.127836	7.08852	6.33591	1
tamm41	2.09194	5.97069	2.31642	0.128014	6.45082	5.65793	1
lman2	-1.24393	6.75194	2.31445	0.128176	6.28065	7.14103	1
si:ch211-13c6.2	2.08971	5.97046	2.31044	0.128508	6.45066	5.65793	1
tmem134	-3.15431	5.84931	2.30914	0.128615	5.27993	5.91892	1
mapre2	-3.15431	5.8493	2.30912	0.128617	5.27993	5.91892	1
tnfsf12	-3.15431	5.84928	2.30908	0.128621	5.27993	5.91892	1
snai2	-3.15431	5.84928	2.30908	0.128621	5.27993	5.91892	1
cited1	-3.1543	5.84914	2.30875	0.128647	5.27993	5.91892	1
snapin	-3.1543	5.84914	2.30875	0.128647	5.27993	5.91892	1
tma16	-3.1543	5.84914	2.30875	0.128647	5.27993	5.91892	1
stx8	-3.1543	5.84912	2.3087	0.128652	5.27993	5.91892	1
actl6a	-3.15429	5.84903	2.30851	0.128667	5.27993	5.91892	1
LOC793439	-3.15429	5.84894	2.30831	0.128684	5.27993	5.91892	1
eif2s3	0.660826	8.73019	2.308	0.12871	9.03634	8.50953	1
zfpm1	1.12321	6.61316	2.30703	0.12879	7.18797	6.50817	1
h3f3b.1	1.36854	6.71878	2.30102	0.129289	6.86597	6.14223	1
slc40a1	-1.1903	6.90989	2.29311	0.129949	6.45066	7.33006	1
me3	1.00379	7.32712	2.28429	0.13069	7.60323	6.92123	1
ppp1r13l	0.930357	7.32915	2.27671	0.13133	7.80487	7.14761	1
mrps9	1.36991	6.75223	2.27602	0.131389	6.86598	6.14223	1
lmo2	1.10765	6.85114	2.27398	0.131562	7.36867	6.65797	1
rpl7a	-0.198201	11.8184	2.2665	0.132198	11.712	11.9865	1
hnrnpa0b	-0.957225	7.32692	2.26401	0.132411	6.98148	7.79716	1
gstr	0.675246	8.59458	2.25929	0.132815	8.67369	8.14924	1
mgat5	-1.32033	6.41453	2.25492	0.13319	6.08791	6.92255	1
usp5	-1.32019	6.41423	2.25447	0.133229	6.08791	6.92123	1
ctsc	-1.32029	6.3709	2.25374	0.133292	6.0879	6.92123	1
zgc:175214	-1.3204	6.45607	2.25259	0.133391	6.0879	6.92255	1
dnaja3a	-1.31986	6.45607	2.25066	0.133557	6.08791	6.91978	1
nrp1b	-1.32046	6.49745	2.24671	0.133899	6.0879	6.92255	1
ncl	0.623528	8.41535	2.24416	0.13412	8.67372	8.19521	1
prkcda	-2.06092	5.97057	2.23773	0.134679	5.60215	6.50817	1
cyp1b1	3.19796	5.78599	2.23591	0.134837	5.86538	5.33493	1
pinx1	3.19796	5.78587	2.23562	0.134862	5.86538	5.33493	1
lrrc8aa	3.19796	5.78581	2.23548	0.134875	5.86538	5.33493	1
upf1	-1.31983	6.53569	2.23527	0.134893	6.0879	6.91978	1
ppil2	3.19199	5.78614	2.22996	0.135357	5.86538	5.33493	1
mospd2	3.19199	5.78614	2.22996	0.135357	5.86538	5.33493	1
gsk3aa	3.19199	5.78608	2.22982	0.13537	5.86538	5.33493	1
mrpl13	3.19199	5.786	2.22962	0.135388	5.86538	5.33493	1
zgc:158852	3.19199	5.78595	2.22949	0.135398	5.86538	5.33493	1
cox11	3.19199	5.78588	2.22931	0.135415	5.86538	5.33493	1
snx27b	3.19199	5.78588	2.22931	0.135415	5.86538	5.33493	1
zgc:63587	3.19199	5.78581	2.22913	0.13543	5.86538	5.33493	1
zgc:112052	3.19199	5.78581	2.22913	0.13543	5.86538	5.33493	1
dvl2	3.19199	5.78564	2.22871	0.135467	5.86538	5.33493	1
kctd7	3.19199	5.78564	2.22871	0.135467	5.86538	5.33493	1
cyp1d1	3.19199	5.78564	2.22871	0.135467	5.86538	5.33493	1
dffa	3.19199	5.78555	2.22849	0.135486	5.86538	5.33493	1
tradd	3.19199	5.78555	2.22847	0.135488	5.86538	5.33493	1
hmbsa	3.19199	5.78529	2.22783	0.135544	5.86538	5.33493	1
timm23a	-1.25129	6.85139	2.22744	0.135579	6.28065	7.14761	1
pcbp2	0.625949	8.43621	2.22646	0.135665	8.67376	8.19421	1
dlg1l	-2.05449	5.97062	2.22414	0.135868	5.60215	6.50661	1
brd8	-2.05449	5.9705	2.22362	0.135914	5.60215	6.50661	1
plxdc2	3.18603	5.78601	2.22334	0.135939	5.86537	5.33493	1
lyrm4	3.18602	5.78585	2.22292	0.135975	5.86537	5.33493	1
plk3	3.18602	5.78583	2.22287	0.13598	5.86537	5.33493	1
bmi1a	3.18602	5.78583	2.22287	0.13598	5.86537	5.33493	1
rab40c	3.18602	5.78583	2.22287	0.13598	5.86537	5.33493	1
ints13	3.18602	5.78583	2.22287	0.13598	5.86537	5.33493	1
zgc:101569	3.18602	5.78575	2.22268	0.135996	5.86537	5.33493	1
ahsa1a	3.18602	5.78557	2.22223	0.136037	5.86537	5.33493	1
brd1b	3.18602	5.78557	2.22221	0.136038	5.86537	5.33493	1
fgf3	3.18601	5.78529	2.2215	0.136101	5.86537	5.33493	1
rnf40	3.18601	5.78527	2.22145	0.136106	5.86537	5.33493	1
phykpl	3.186	5.78483	2.22035	0.136202	5.86537	5.33493	1
stag2a	1.12673	6.71922	2.21414	0.136751	7.18798	6.50364	1
dnm1l	1.12655	6.71927	2.21347	0.13681	7.18807	6.50364	1
casq2	0.606957	9.93941	2.20627	0.13745	10.0364	9.53979	1
hspb1	-0.537945	10.2814	2.20344	0.137703	9.77334	10.3708	1
serpinb1l3	0.774204	7.57428	2.20269	0.13777	7.98176	7.42205	1
pepd	-1.31966	6.2334	2.20266	0.137772	6.0879	6.91978	1
atl2	-1.31903	6.6109	2.20257	0.137781	6.08791	6.91846	1
camk2b1	-0.834498	7.41427	2.20253	0.137784	7.28119	8.03501	1
zgc:66427	-3.18879	5.78637	2.19986	0.138023	5.27993	5.92215	1
LOC554962	-3.1888	5.78632	2.19972	0.138036	5.27993	5.92215	1
mtfr1l	-3.18881	5.78619	2.19941	0.138064	5.27993	5.92215	1
golph3	-3.18881	5.78604	2.19906	0.138095	5.27993	5.92215	1
ostc	-3.18882	5.78592	2.19877	0.138121	5.27993	5.92215	1
c1s	-3.18884	5.78567	2.19818	0.138174	5.27993	5.92215	1
eif2b3	-3.18885	5.78548	2.19771	0.138216	5.27993	5.92215	1
itga5	1.00291	7.43583	2.18291	0.139551	7.45114	6.79351	1
syf2	-1.24675	6.88061	2.18156	0.139673	6.28065	7.14368	1
chmp4bb	1.1283	6.75253	2.17987	0.139826	7.18798	6.50224	1
zmym4	-3.16936	5.78605	2.17847	0.139953	5.27993	5.92041	1
rbm17	-3.16936	5.78591	2.17814	0.139984	5.27993	5.92041	1
traf7	-3.16936	5.78585	2.178	0.139996	5.27993	5.92041	1
ltv1	-3.16936	5.7858	2.17786	0.140009	5.27993	5.92041	1
fbxl14b	-3.16936	5.78575	2.17774	0.14002	5.27993	5.92041	1
slc25a46	-3.16936	5.78565	2.17751	0.140041	5.27993	5.92041	1
si:dkey-188i13.6	-3.16936	5.78546	2.17705	0.140083	5.27993	5.92041	1
ftr67	-3.16936	5.78542	2.17693	0.140094	5.27993	5.92041	1
dtx2	-3.16936	5.78536	2.17679	0.140107	5.27993	5.92041	1
tmcc1b	-3.16936	5.78533	2.17672	0.140113	5.27993	5.92041	1
zgc:158482	-3.16936	5.78532	2.1767	0.140115	5.27993	5.92041	1
bhlhe41	-3.16936	5.78532	2.1767	0.140115	5.27993	5.92041	1
wdr75	-3.16936	5.78513	2.17623	0.140158	5.27993	5.92041	1
vps33b	-3.16936	5.78502	2.17596	0.140182	5.27993	5.92041	1
rap1ab	-3.16936	5.78492	2.17573	0.140203	5.27993	5.92041	1
slc22a18	-3.16936	5.78487	2.17561	0.140214	5.27993	5.92041	1
znf592	-3.16936	5.78487	2.17561	0.140214	5.27993	5.92041	1
slc25a37	3.73415	5.57456	2.17373	0.140386	6.08811	5.33493	1
sppl3	3.73415	5.57456	2.17373	0.140386	6.08811	5.33493	1
ppp2cb	-1.05517	7.16056	2.16753	0.140952	6.74041	7.5886	1
asb12a	3.72683	5.57436	2.1668	0.14102	6.08791	5.33493	1
slbp	3.72683	5.57436	2.1668	0.14102	6.08791	5.33493	1
emc8	3.72683	5.57436	2.1668	0.14102	6.08791	5.33493	1
uvssa	3.72683	5.57436	2.1668	0.14102	6.08791	5.33493	1
smarcc1b	3.72683	5.57436	2.1668	0.14102	6.08791	5.33493	1
si:dkey-103e21.5	3.72683	5.57436	2.1668	0.14102	6.08791	5.33493	1
srgn	0.694871	7.91269	2.16432	0.141247	8.08873	7.58502	1
ampd3b	0.695343	7.86671	2.16357	0.141316	8.08878	7.58386	1
scn4ba	1.12408	6.75305	2.16328	0.141342	7.18797	6.5052	1
ccdc130	3.71994	5.57423	2.16057	0.141592	6.0879	5.33493	1
LOC107988037	3.71994	5.57423	2.16057	0.141592	6.0879	5.33493	1
pus3	3.71994	5.57423	2.16057	0.141592	6.0879	5.33493	1
psmc3	-1.31918	6.68378	2.15802	0.141827	6.08791	6.91978	1
psph	-3.25467	5.73491	2.15775	0.141852	5.27993	5.95298	1
ifih1	-3.15052	5.78533	2.15719	0.141904	5.27993	5.91892	1
cdkn1ca	-3.15052	5.78526	2.15701	0.141921	5.27993	5.91892	1
impact	-3.15052	5.78521	2.1569	0.141931	5.27993	5.91892	1
ptpmt1	-3.15052	5.78521	2.15688	0.141932	5.27993	5.91892	1
ism1	-3.15052	5.78518	2.15683	0.141937	5.27993	5.91892	1
amfra	1.12276	6.75436	2.15681	0.141939	7.18798	6.50817	1
gpr146	1.49924	6.4141	2.15672	0.141947	6.60287	5.91892	1
lipf	-3.15051	5.78507	2.15654	0.141964	5.27993	5.91892	1
clns1a	-3.1505	5.78493	2.15621	0.141995	5.27993	5.91892	1
npsn	-3.1505	5.78492	2.15619	0.141997	5.27993	5.91892	1
bco2l	-3.1505	5.78491	2.15616	0.142	5.27993	5.91892	1
zgc:112023	-3.1505	5.78488	2.15607	0.142008	5.27993	5.91892	1
ckap4	-3.1505	5.78488	2.15607	0.142008	5.27993	5.91892	1
ncf1	-3.1505	5.78482	2.15592	0.142021	5.27993	5.91892	1
atp1b2a	-3.1505	5.78482	2.15592	0.142021	5.27993	5.91892	1
meaf6	1.49921	6.3705	2.15587	0.142026	6.60287	5.91892	1
rcn3	-3.15049	5.78467	2.15556	0.142054	5.27993	5.91892	1
casp8	-3.15048	5.78453	2.15521	0.142087	5.27993	5.91892	1
usp54a	1.49833	6.4146	2.15454	0.142149	6.60287	5.92215	1
si:dkey-19a16.2	3.71302	5.57411	2.15434	0.142167	6.0879	5.33493	1
prmt2	3.71302	5.57411	2.15434	0.142167	6.0879	5.33493	1
ntn1b	-3.73308	5.57463	2.15254	0.142334	5.27993	6.14536	1
zgc:174653	-3.73308	5.57463	2.15254	0.142334	5.27993	6.14536	1
zgc:174696	-3.73308	5.57463	2.15254	0.142334	5.27993	6.14536	1
atp1b3b	1.49912	6.32666	2.15155	0.142426	6.60287	5.92041	1
puf60b	1.49912	6.32659	2.15154	0.142427	6.60287	5.92041	1
si:ch73-281f12.4	1.49926	6.49604	2.15096	0.142481	6.60287	5.91892	1
s100v2	1.49942	6.53594	2.14475	0.143058	6.60287	5.91892	1
selenow2a	-0.953973	7.39313	2.14228	0.143289	6.86597	7.65845	1
tsc2	1.49936	6.28042	2.14227	0.14329	6.60287	5.91892	1
sun1	1.49915	6.28151	2.14202	0.143313	6.60287	5.92041	1
sirt2	1.49915	6.2808	2.14181	0.143333	6.60287	5.92041	1
ugp2b	1.49894	6.28056	2.14097	0.143411	6.60272	5.91892	1
fblim1	1.49783	6.53607	2.14051	0.143455	6.60272	5.92215	1
rnf2	1.4978	6.2814	2.13844	0.143648	6.60272	5.92215	1
ttc19	1.49943	6.57436	2.13551	0.143922	6.60287	5.91892	1
ltbp3	-1.05723	7.37091	2.13477	0.143992	6.60287	7.42205	1
pgrmc1	1.49906	6.57486	2.13433	0.144034	6.60287	5.92041	1
ftr50	-3.71155	5.57423	2.13311	0.144148	5.27993	6.1439	1
cmtm7	-3.71155	5.57423	2.13311	0.144148	5.27993	6.1439	1
emg1	-3.71155	5.57423	2.13311	0.144148	5.27993	6.1439	1
zgc:153675	-3.71155	5.57423	2.13311	0.144148	5.27993	6.1439	1
taf6l	-3.71155	5.57423	2.13311	0.144148	5.27993	6.1439	1
supt3h	-3.71155	5.57423	2.13311	0.144148	5.27993	6.1439	1
ino80c	1.49769	6.57394	2.13118	0.144329	6.60287	5.92215	1
dhdhl	1.49973	6.23417	2.12366	0.14504	6.60287	5.91892	1
rrbp1a	1.49866	6.23365	2.12024	0.145363	6.60272	5.92041	1
hdlbpa	0.473126	10.4762	2.11855	0.145524	10.6479	10.2679	1
eef2a.1	-3.68937	5.57375	2.11299	0.146054	5.27993	6.14223	1
stx11a	-3.68937	5.57375	2.11299	0.146054	5.27993	6.14223	1
crata	1.49815	6.64911	2.10534	0.146786	6.60287	5.92215	1
zmat2	1.12737	6.81805	2.09546	0.147737	7.18807	6.50364	1
si:ch211-51h9.7	-3.66744	5.57335	2.09357	0.14792	5.27993	6.14077	1
si:busm1-266f07.2	-3.66744	5.57335	2.09357	0.14792	5.27993	6.14077	1
eipr1	-3.66744	5.57335	2.09357	0.14792	5.27993	6.14077	1
si:dkey-266f7.5	-3.66744	5.57335	2.09357	0.14792	5.27993	6.14077	1
rhof	-3.66744	5.57335	2.09357	0.14792	5.27993	6.14077	1
snrpb2	-3.66744	5.57335	2.09357	0.14792	5.27993	6.14077	1
rock2a	-0.575344	8.12247	2.08693	0.148564	8.03621	8.62269	1
fn1a	1.50028	6.18508	2.08689	0.148568	6.60287	5.91892	1
actr3	-0.766903	7.61179	2.08644	0.148612	7.2812	7.97674	1
zgc:103692	1.49962	6.18509	2.08513	0.14874	6.60287	5.92041	1
rps9	-0.303697	11.2163	2.08503	0.14875	11.1081	11.4874	1
cox7a2a	1.49933	6.18477	2.08402	0.148848	6.60287	5.92041	1
acbd3	1.49905	6.18496	2.08344	0.148905	6.60287	5.92041	1
ddb2	1.49824	6.18468	2.08079	0.149162	6.60272	5.92041	1
rbfox1l	0.995703	6.57619	2.07042	0.15018	7.28119	6.65949	1
rpsa	0.278415	11.3289	2.06968	0.150253	11.5342	11.3396	1
sobpb	2.10273	5.91184	2.06878	0.150342	6.45082	5.65641	1
eif3ea	0.632558	8.92077	2.06503	0.150712	9.30385	8.79466	1
btbd9	3.19914	5.71902	2.06312	0.150901	5.86538	5.33493	1
socs1a	3.19914	5.71874	2.06238	0.150974	5.86538	5.33493	1
eftud2	2.09989	5.91166	2.06238	0.150974	6.45066	5.65641	1
acot9.2	3.19914	5.71873	2.06237	0.150975	5.86538	5.33493	1
atl3	3.19914	5.71873	2.06237	0.150975	5.86538	5.33493	1
ppcs	3.19915	5.71868	2.06225	0.150987	5.86538	5.33493	1
btg2	3.19915	5.71848	2.0617	0.151042	5.86538	5.33493	1
nelfb	3.19915	5.71848	2.0617	0.151042	5.86538	5.33493	1
ass1	3.19915	5.71843	2.06158	0.151054	5.86538	5.33493	1
otud7b	3.19915	5.71833	2.06132	0.151079	5.86538	5.33493	1
frzb	-1.23586	7.05231	2.05942	0.151268	6.28083	7.13838	1
adh5	0.999028	7.0285	2.05663	0.151545	7.60316	6.92255	1
smarcd3b	3.192	5.71894	2.05612	0.151595	5.86538	5.33493	1
commd2	3.192	5.71894	2.05612	0.151595	5.86538	5.33493	1
nkiras2	3.192	5.71889	2.056	0.151608	5.86538	5.33493	1
ets2	3.192	5.71887	2.05593	0.151614	5.86538	5.33493	1
rnf113a	3.192	5.71875	2.05563	0.151644	5.86538	5.33493	1
gpatch1	3.192	5.71875	2.05562	0.151646	5.86538	5.33493	1
sec11a	3.192	5.71871	2.05551	0.151657	5.86538	5.33493	1
lmbrd2b	3.192	5.71866	2.05538	0.151669	5.86538	5.33493	1
fam241a	3.192	5.71861	2.05526	0.151681	5.86538	5.33493	1
diablob	3.192	5.71856	2.05513	0.151695	5.86538	5.33493	1
pex3	3.192	5.71856	2.05513	0.151695	5.86538	5.33493	1
surf2	3.192	5.7185	2.05496	0.151711	5.86538	5.33493	1
map2k2a	3.192	5.7185	2.05496	0.151711	5.86538	5.33493	1
yju2	3.192	5.71847	2.05488	0.151719	5.86538	5.33493	1
cdk5rap1	3.192	5.71842	2.05475	0.151732	5.86538	5.33493	1
csnk1e	3.192	5.71835	2.05458	0.151749	5.86538	5.33493	1
thap12a	3.192	5.71835	2.05458	0.151749	5.86538	5.33493	1
sap130a	3.192	5.71821	2.0542	0.151787	5.86538	5.33493	1
pdpk1a	3.192	5.71821	2.0542	0.151787	5.86538	5.33493	1
wbp4	2.09733	5.91095	2.05415	0.151792	6.45066	5.65641	1
med6	3.192	5.71816	2.05408	0.151799	5.86538	5.33493	1
mccc2	0.997235	7.64877	2.05357	0.151849	7.2812	6.6566	1
hspb8	-0.952613	7.32684	2.05347	0.151859	6.86598	7.65845	1
pdk4	1.00117	7.32728	2.05308	0.151898	7.45114	6.79633	1
plce1	3.18485	5.71844	2.04803	0.152404	5.86537	5.33493	1
ciao2b	3.18485	5.71837	2.04786	0.152421	5.86537	5.33493	1
vstm4a	3.18485	5.71837	2.04786	0.152421	5.86537	5.33493	1
im:7138535	3.18485	5.71829	2.04764	0.152442	5.86537	5.33493	1
mettl26	3.18484	5.71808	2.04709	0.152497	5.86537	5.33493	1
macc1	3.18484	5.71804	2.04697	0.152509	5.86537	5.33493	1
auh	-1.31837	6.81803	2.04627	0.15258	6.08791	6.91978	1
fibpa	2.09011	5.91218	2.04599	0.152608	6.45082	5.65793	1
ndufa4	0.53353	10.1717	2.04448	0.152759	10.326	9.89225	1
yy1a	-1.07311	6.68378	2.04018	0.153192	6.45066	7.24002	1
tmem56b	-3.19261	5.71899	2.03284	0.153933	5.27993	5.92215	1
tm9sf4	-3.19261	5.71895	2.03272	0.153945	5.27993	5.92215	1
slc44a5b	-3.19261	5.71885	2.03247	0.15397	5.27993	5.92215	1
asb16	-3.19262	5.7188	2.03236	0.153982	5.27993	5.92215	1
zgc:101783	-3.19265	5.71825	2.03098	0.154122	5.27993	5.92215	1
klhl4	1.14773	6.53591	2.02941	0.15428	6.98159	6.33429	1
znf395a	1.14713	6.53716	2.02703	0.154522	6.98148	6.33591	1
smek1	1.14704	6.53635	2.02699	0.154526	6.98148	6.33591	1
zgc:55582	1.14704	6.28153	2.02404	0.154827	6.98148	6.33591	1
hsd17b12b	1.50075	6.13401	2.01953	0.155288	6.60287	5.91892	1
exoc6b	-1.45134	6.37079	2.01323	0.155933	5.86537	6.65949	1
acaca	-1.4513	6.37154	2.01314	0.155943	5.86538	6.65949	1
kdm2aa	1.49829	6.13411	2.01307	0.155949	6.60272	5.92041	1
taf7	-1.45088	6.41299	2.0125	0.156008	5.86538	6.65797	1
irx2a	-1.45083	6.41357	2.01236	0.156022	5.86537	6.6566	1
zgc:111986	-1.45078	6.37014	2.0115	0.156111	5.86538	6.6566	1
smim4	-1.45097	6.45573	2.01111	0.156151	5.86537	6.65797	1
ablim3	-3.16948	5.71892	2.01072	0.156191	5.27993	5.92041	1
klhl21	-1.45082	6.45576	2.01069	0.156194	5.86537	6.6566	1
gsto2	-1.45077	6.455	2.0106	0.156203	5.86538	6.6566	1
asphd2	-3.16948	5.71871	2.01019	0.156246	5.27993	5.92041	1
junbb	-3.16948	5.71864	2.01	0.156265	5.27993	5.92041	1
si:ch211-195h23.3	-3.16948	5.71853	2.00971	0.156295	5.27993	5.92041	1
eif5a	0.490397	10.3592	2.00968	0.156298	10.4615	10.0665	1
nol11	-3.16948	5.71838	2.00934	0.156333	5.27993	5.92041	1
tle2c	-3.16948	5.71838	2.00934	0.156333	5.27993	5.92041	1
ssuh2.2	-3.16948	5.71838	2.00934	0.156333	5.27993	5.92041	1
wbp1la	-3.16948	5.71838	2.00934	0.156333	5.27993	5.92041	1
commd8	-3.16948	5.71838	2.00934	0.156333	5.27993	5.92041	1
h3f3d	1.00186	7.28244	2.00928	0.15634	7.45122	6.79485	1
smo	-3.16948	5.71833	2.00922	0.156345	5.27993	5.92041	1
nfybb	-3.16948	5.71833	2.00922	0.156345	5.27993	5.92041	1
dennd2db	-3.16948	5.71833	2.00922	0.156345	5.27993	5.92041	1
atox1	-3.16948	5.71833	2.00922	0.156345	5.27993	5.92041	1
sh3rf1	-3.16948	5.71827	2.00906	0.156362	5.27993	5.92041	1
gabpb2a	-3.16948	5.71827	2.00906	0.156362	5.27993	5.92041	1
rfx2	-3.16948	5.71824	2.00899	0.15637	5.27993	5.92041	1
ccdc167	-3.16948	5.71824	2.00899	0.15637	5.27993	5.92041	1
tmem246	-3.16948	5.71824	2.00899	0.15637	5.27993	5.92041	1
alox12	-3.16948	5.71812	2.00869	0.1564	5.27993	5.92041	1
manbal	-3.16948	5.71808	2.00857	0.156412	5.27993	5.92041	1
eva1bb	-3.16948	5.71793	2.00821	0.15645	5.27993	5.92041	1
si:ch211-219a4.3	-1.45093	6.32586	2.00802	0.156469	5.86538	6.65797	1
si:ch211-251j10.3	-3.16948	5.71779	2.00784	0.156488	5.27993	5.92041	1
mettl1	1.49593	6.13434	2.00763	0.15651	6.60272	5.92215	1
clgn	-1.45079	6.49557	2.00691	0.156584	5.86537	6.6566	1
hibadhb	-1.07071	7.1616	2.0067	0.156606	6.60287	7.42946	1
rnaseka	-1.45146	6.28116	2.00068	0.157229	5.86538	6.65949	1
gnl3	-1.45146	6.28099	2.00063	0.157233	5.86538	6.65949	1
shroom3	-1.45103	6.28008	1.99906	0.157396	5.86537	6.65797	1
s100u	1.14834	6.61112	1.99883	0.15742	6.98148	6.33286	1
brd4	-1.45064	6.27982	1.99794	0.157514	5.86538	6.6566	1
sypl2a	0.914681	7.4547	1.9937	0.157955	7.52923	6.91846	1
rhoua	-0.95313	7.45659	1.98915	0.15843	6.74041	7.51006	1
maip1	-3.14691	5.71832	1.98819	0.158531	5.27993	5.91892	1
gxylt2	-3.14691	5.71824	1.988	0.15855	5.27993	5.91892	1
pecr	-2.06464	5.91206	1.9879	0.15856	5.60215	6.50817	1
men1	-3.1469	5.71813	1.98771	0.158581	5.27993	5.91892	1
msto1	-3.1469	5.71808	1.98759	0.158593	5.27993	5.91892	1
ackr3b	-3.1469	5.71798	1.98734	0.158619	5.27993	5.91892	1
abt1	-3.14689	5.71794	1.98722	0.158632	5.27993	5.91892	1
ppp2r2d	-3.14689	5.71787	1.98706	0.158649	5.27993	5.91892	1
sgk2a	-3.14689	5.71783	1.98694	0.158662	5.27993	5.91892	1
tppp3	-3.14688	5.71773	1.98669	0.158688	5.27993	5.91892	1
tuba1c	1.03788	6.52599	1.98629	0.158729	7.1395	6.51542	1
rsl24d1	0.604916	9.57136	1.98393	0.158976	10.0629	9.56317	1
anks1b	-1.45153	6.23417	1.98237	0.159141	5.86538	6.65949	1
prpf40a	1.78993	6.37051	1.97664	0.159744	6.28065	5.65641	1
psmc2	1.78989	6.45553	1.97599	0.159813	6.28065	5.65641	1
txndc5	1.78984	6.45527	1.9759	0.159823	6.28065	5.65641	1
oat	1.14817	6.64883	1.97512	0.159906	6.98148	6.33429	1
notch3	1.14671	6.64938	1.96997	0.160451	6.98148	6.33734	1
mrps26	1.79001	6.28092	1.96899	0.160555	6.28065	5.65641	1
arih1	1.79001	6.28	1.96884	0.160571	6.28065	5.65641	1
ilk	-1.32007	6.94112	1.96557	0.160919	6.08791	6.92123	1
supt6h	1.78967	6.57526	1.96411	0.161074	6.28065	5.65793	1
snu13a	-2.05227	5.91178	1.96336	0.161155	5.60215	6.50661	1
tmem106a	-2.05227	5.91173	1.96312	0.16118	5.60215	6.50661	1
srrm1	1.12436	6.94177	1.96269	0.161226	7.18807	6.5052	1
zeb1b	1.1236	6.94133	1.96027	0.161484	7.18797	6.5052	1
rtn4a	0.630321	7.9147	1.95929	0.16159	8.18831	7.73407	1
si:ch211-235o23.1	-1.31775	6.94076	1.95882	0.161639	6.08791	6.91978	1
gorasp2	1.7901	6.23412	1.95819	0.161707	6.28083	5.65793	1
noc2l	1.79012	6.23265	1.95752	0.161779	6.28065	5.65641	1
snx16	1.7896	6.23412	1.95691	0.161844	6.28065	5.65793	1
zfpm2a	1.78943	6.23334	1.95631	0.161908	6.28065	5.65793	1
msh2	-2.04818	5.91088	1.95179	0.162394	5.60215	6.5052	1
si:dkey-67c22.2	-1.0594	6.99951	1.94645	0.16297	6.60272	7.42325	1
gpia	0.606309	8.55593	1.94542	0.163081	8.70767	8.24161	1
sec24c	-2.04415	5.911	1.9448	0.163149	5.60215	6.5052	1
ece1	-1.06029	7.02788	1.94209	0.163442	6.60287	7.42575	1
gigyf2	1.79097	6.18422	1.93761	0.163928	6.28083	5.65641	1
nrp2b	1.7903	6.18458	1.93644	0.164056	6.28083	5.65793	1
fut8a	1.79033	6.18477	1.93639	0.164061	6.28065	5.65641	1
wdr13	1.79033	6.18431	1.93612	0.16409	6.28065	5.65641	1
psmb6	1.79001	6.18458	1.93583	0.164122	6.28083	5.65793	1
cebpa	1.79004	6.18433	1.93553	0.164155	6.28065	5.65641	1
ddx54	-1.07474	6.78649	1.93546	0.164162	6.45066	7.24262	1
swap70b	1.78974	6.18374	1.93456	0.16426	6.28065	5.65641	1
slc3a2b	1.78908	6.18483	1.93385	0.164338	6.28065	5.65793	1
pdcd10a	1.78878	6.18408	1.93278	0.164455	6.28065	5.65793	1
oard1	-1.74321	6.29819	1.92843	0.164931	5.61707	6.36545	1
cdc37	1.121	7.00072	1.92253	0.165578	7.18798	6.50817	1
rplp0	0.173943	11.8717	1.92108	0.165738	11.9505	11.8569	1
ezh1	1.14765	6.71869	1.91995	0.165862	6.98148	6.33429	1
smyd2b	-0.957902	7.16061	1.91753	0.166129	6.86586	7.66082	1
tmem126a	1.14689	6.71932	1.9171	0.166176	6.98148	6.33591	1
zgc:162944	1.00079	6.97136	1.90392	0.16764	7.45114	6.79485	1
adgrg1	1.49792	6.08194	1.90334	0.167705	6.60272	5.92041	1
trim33	1.49619	6.08223	1.90017	0.168059	6.60287	5.92215	1
baz2a	1.1501	6.75371	1.89752	0.168356	6.98148	6.33286	1
mef2d	1.79036	6.13411	1.89693	0.168422	6.28083	5.65793	1
aclya	1.7902	6.13342	1.8957	0.16856	6.28065	5.65641	1
isca1	1.1492	6.75292	1.8953	0.168606	6.98148	6.33429	1
msl1a	1.78897	6.13459	1.89438	0.168708	6.28065	5.65793	1
mtch2	0.584901	8.37017	1.89125	0.169061	8.5293	8.08898	1
ncor1	0.705164	7.68458	1.88966	0.169241	7.92511	7.42705	1
aldh7a1	-0.950288	7.37038	1.88936	0.169275	6.74041	7.50761	1
prkar1ab	-1.45106	6.13396	1.88157	0.170156	5.86538	6.65797	1
ldha	0.588979	9.71509	1.87941	0.170401	9.91087	9.42645	1
cited2	3.20019	5.64866	1.87936	0.170407	5.86538	5.33493	1
wipf2b	3.2002	5.64847	1.87888	0.170462	5.86538	5.33493	1
cuedc1b	3.2002	5.64837	1.87862	0.170491	5.86538	5.33493	1
nup93	3.2002	5.64837	1.87862	0.170491	5.86538	5.33493	1
ccdc102a	3.2002	5.64833	1.8785	0.170505	5.86538	5.33493	1
mpz	3.2002	5.64833	1.8785	0.170505	5.86538	5.33493	1
lsm5	3.2002	5.64833	1.8785	0.170505	5.86538	5.33493	1
ppm1h	3.2002	5.64825	1.87832	0.170526	5.86538	5.33493	1
gpank1	3.2002	5.64825	1.87832	0.170526	5.86538	5.33493	1
klf12a	3.2002	5.64811	1.87794	0.170568	5.86538	5.33493	1
ptprfb	3.2002	5.64807	1.87783	0.170581	5.86538	5.33493	1
dnajb1a	3.2002	5.64807	1.87783	0.170581	5.86538	5.33493	1
psmd5	3.2002	5.64807	1.87783	0.170581	5.86538	5.33493	1
cntfr	3.2002	5.64792	1.87745	0.170624	5.86538	5.33493	1
ptprma	3.2002	5.64792	1.87745	0.170624	5.86538	5.33493	1
ndufa13	-1.07728	6.85061	1.87488	0.170917	6.45082	7.24521	1
gatad2ab	3.19201	5.64853	1.8722	0.171223	5.86538	5.33493	1
fbxo40.1	3.19201	5.64853	1.8722	0.171223	5.86538	5.33493	1
mgat4b	3.19201	5.64853	1.8722	0.171223	5.86538	5.33493	1
palm1a	3.19201	5.64853	1.8722	0.171223	5.86538	5.33493	1
mfsd8	3.19201	5.64853	1.8722	0.171223	5.86538	5.33493	1
arfrp1	3.19201	5.64839	1.87183	0.171266	5.86538	5.33493	1
mapk7	3.19201	5.64839	1.87183	0.171266	5.86538	5.33493	1
ttc5	3.19201	5.64835	1.87172	0.171279	5.86538	5.33493	1
skilb	3.19201	5.64835	1.87172	0.171279	5.86538	5.33493	1
cuedc2	3.19201	5.64835	1.87172	0.171279	5.86538	5.33493	1
tbc1d22a	3.19201	5.64835	1.87172	0.171279	5.86538	5.33493	1
slc25a16	3.19201	5.64835	1.87172	0.171279	5.86538	5.33493	1
zgc:162698	3.19201	5.64835	1.87172	0.171279	5.86538	5.33493	1
rab24	3.19201	5.64835	1.87172	0.171279	5.86538	5.33493	1
def8	3.19201	5.6482	1.87134	0.171322	5.86538	5.33493	1
hvcn1	3.19201	5.64813	1.87116	0.171343	5.86538	5.33493	1
ppp4r1	3.19201	5.64813	1.87116	0.171343	5.86538	5.33493	1
casd1	3.19201	5.64813	1.87116	0.171343	5.86538	5.33493	1
ralbb	3.19201	5.64809	1.87104	0.171356	5.86538	5.33493	1
slc25a21	3.19201	5.64809	1.87104	0.171356	5.86538	5.33493	1
pitpnb	3.19201	5.64809	1.87104	0.171356	5.86538	5.33493	1
ndufv2	-0.619561	8.48527	1.87098	0.171363	7.92517	8.54492	1
dctn1a	3.19201	5.64798	1.87078	0.171386	5.86538	5.33493	1
pacs1a	3.19201	5.64798	1.87078	0.171386	5.86538	5.33493	1
plek	3.19201	5.64798	1.87078	0.171386	5.86538	5.33493	1
mpp6b	3.19201	5.64798	1.87078	0.171386	5.86538	5.33493	1
ascc1	3.19201	5.64798	1.87078	0.171386	5.86538	5.33493	1
mrpl1	3.19201	5.64794	1.87067	0.171399	5.86538	5.33493	1
add3b	3.19201	5.64794	1.87067	0.171399	5.86538	5.33493	1
paics	3.19201	5.64779	1.87029	0.171442	5.86538	5.33493	1
copz1	-1.74486	6.41317	1.86994	0.171482	5.60215	6.33591	1
coro1ca	-1.74496	6.37104	1.86976	0.171503	5.60215	6.33734	1
tbx18	-1.74438	6.36998	1.86832	0.171668	5.60215	6.33429	1
tpd52l2b	0.604283	8.04229	1.86568	0.17197	8.23557	7.79376	1
kifap3b	3.18381	5.64841	1.86505	0.172043	5.86537	5.33493	1
siae	3.18381	5.64841	1.86505	0.172043	5.86537	5.33493	1
mier1a	3.18381	5.64827	1.86468	0.172085	5.86537	5.33493	1
sft2d3	3.18381	5.64827	1.86468	0.172085	5.86537	5.33493	1
tdgf1	3.18381	5.64827	1.86468	0.172085	5.86537	5.33493	1
yeats4	3.18381	5.64822	1.86457	0.172098	5.86537	5.33493	1
znf1160	3.18381	5.64822	1.86457	0.172098	5.86537	5.33493	1
anks3	3.18381	5.64812	1.86431	0.172128	5.86537	5.33493	1
slc9a6a	3.18381	5.64812	1.86431	0.172128	5.86537	5.33493	1
zfpl1	3.18381	5.64812	1.86431	0.172128	5.86537	5.33493	1
ptbp2b	3.18381	5.64808	1.86419	0.172142	5.86537	5.33493	1
hsd17b3	3.18381	5.64801	1.86401	0.172163	5.86537	5.33493	1
dnajc2	3.18381	5.64801	1.86401	0.172163	5.86537	5.33493	1
uchl5	3.18381	5.64801	1.86401	0.172163	5.86537	5.33493	1
smim19	3.18381	5.64801	1.86401	0.172163	5.86537	5.33493	1
fbxo11a	3.18381	5.64801	1.86401	0.172163	5.86537	5.33493	1
rab9a	3.18381	5.64801	1.86401	0.172163	5.86537	5.33493	1
si:dkeyp-113d7.1	3.18381	5.64801	1.86401	0.172163	5.86537	5.33493	1
nab2	3.18381	5.64796	1.8639	0.172176	5.86537	5.33493	1
si:ch211-107n13.1	3.18381	5.64786	1.86364	0.172206	5.86537	5.33493	1
ccar1	3.18381	5.64786	1.86364	0.172206	5.86537	5.33493	1
plekho1b	1.14863	6.78616	1.8636	0.17221	6.98148	6.33429	1
tmem135	3.18381	5.64782	1.86352	0.172219	5.86537	5.33493	1
btf3	0.399781	10.6487	1.8632	0.172256	10.961	10.6496	1
cygb2	3.1838	5.64767	1.86315	0.172262	5.86537	5.33493	1
socs6b	3.1838	5.64767	1.86315	0.172262	5.86537	5.33493	1
chp2	3.1838	5.64767	1.86315	0.172262	5.86537	5.33493	1
ormdl3	3.1838	5.64767	1.86315	0.172262	5.86537	5.33493	1
ddx28	3.1838	5.64767	1.86315	0.172262	5.86537	5.33493	1
eif3hb	-1.74519	6.281	1.86287	0.172294	5.60215	6.33734	1
egln1b	-1.74519	6.28061	1.86281	0.172301	5.60215	6.33734	1
jag2b	-1.7448	6.28136	1.86213	0.172379	5.60215	6.33591	1
mrps7	-1.0978	6.49633	1.86134	0.17247	6.28065	7.03609	1
med25	-3.19596	5.64878	1.85544	0.173152	5.27993	5.92215	1
thrb	-3.19597	5.64863	1.85508	0.173194	5.27993	5.92215	1
si:dkey-93h22.8	-3.19597	5.64859	1.85497	0.173207	5.27993	5.92215	1
pdxdc1	-3.19597	5.64844	1.8546	0.173249	5.27993	5.92215	1
zgc:174904	-3.19598	5.64837	1.85442	0.17327	5.27993	5.92215	1
si:ch211-281g13.4	-3.19598	5.64833	1.85431	0.173282	5.27993	5.92215	1
ubr7	-1.74615	6.23366	1.85429	0.173286	5.60215	6.33895	1
proser3	-3.19598	5.64823	1.85406	0.173312	5.27993	5.92215	1
tubgcp4	-3.19598	5.64823	1.85406	0.173312	5.27993	5.92215	1
anapc11	-3.19599	5.64804	1.85358	0.173367	5.27993	5.92215	1
tmem30aa	-1.09792	6.5362	1.85227	0.17352	6.28065	7.03738	1
snx3	-1.74495	6.23305	1.85145	0.173615	5.60215	6.33591	1
arl4d	-1.74495	6.23273	1.85135	0.173626	5.60215	6.33591	1
bzw1b	-1.74478	6.23369	1.85131	0.173631	5.60215	6.33591	1
zgc:172352	-1.74478	6.23317	1.85115	0.17365	5.60215	6.33591	1
zgc:114046	-1.74409	6.23276	1.84941	0.173852	5.60215	6.33429	1
si:ch211-131k2.3	-0.74871	7.63016	1.8478	0.17404	7.18798	7.85849	1
pleca	-0.575601	8.24477	1.84225	0.174687	7.92517	8.50492	1
aste1a	-1.09716	6.57436	1.83692	0.175313	6.28083	7.03609	1
fgf17	-1.74722	6.18513	1.83598	0.175422	5.60215	6.33895	1
sumo2b	1.14881	6.81915	1.83469	0.175574	6.98148	6.33429	1
rps6kb1b	1.79139	6.08172	1.83264	0.175816	6.28065	5.65641	1
ddx19	-3.16958	5.64831	1.83228	0.175859	5.27993	5.92041	1
frem2b	-3.16958	5.64831	1.83228	0.175859	5.27993	5.92041	1
farsa	1.14775	6.81852	1.83209	0.175881	6.98148	6.33591	1
slc25a38b	-3.16958	5.64816	1.83192	0.175901	5.27993	5.92041	1
paqr4a	-3.16958	5.64816	1.83192	0.175901	5.27993	5.92041	1
gm2a	-3.16958	5.64816	1.83192	0.175901	5.27993	5.92041	1
mgat2	-3.16958	5.64816	1.83192	0.175901	5.27993	5.92041	1
xpo6	-3.16958	5.64812	1.83181	0.175914	5.27993	5.92041	1
hnrnpr	-3.16958	5.64812	1.83181	0.175914	5.27993	5.92041	1
zgc:162939	-3.16958	5.64812	1.83181	0.175914	5.27993	5.92041	1
ccdc58	-3.16958	5.64802	1.83156	0.175944	5.27993	5.92041	1
rfxank	-3.16958	5.64802	1.83156	0.175944	5.27993	5.92041	1
mapre1a	-3.16958	5.64797	1.83144	0.175957	5.27993	5.92041	1
coa5	-3.16958	5.64797	1.83144	0.175957	5.27993	5.92041	1
klhdc10	-3.16958	5.64797	1.83144	0.175957	5.27993	5.92041	1
scn1lab	-3.16958	5.64797	1.83144	0.175957	5.27993	5.92041	1
rnf175	-3.16958	5.64797	1.83144	0.175957	5.27993	5.92041	1
tmem251	-3.16958	5.64797	1.83144	0.175957	5.27993	5.92041	1
dnajc21	-3.16958	5.64797	1.83144	0.175957	5.27993	5.92041	1
smad3a	-3.16958	5.6479	1.83127	0.175978	5.27993	5.92041	1
rps6ka4	-3.16958	5.6479	1.83127	0.175978	5.27993	5.92041	1
b4galt1l	-3.16958	5.6479	1.83127	0.175978	5.27993	5.92041	1
ift46	-3.16958	5.6479	1.83127	0.175978	5.27993	5.92041	1
ipo8	-3.16958	5.6479	1.83127	0.175978	5.27993	5.92041	1
si:ch211-175m2.5	-3.16958	5.6479	1.83127	0.175978	5.27993	5.92041	1
emc9	-3.16958	5.64786	1.83116	0.175991	5.27993	5.92041	1
ubtd2	-3.16958	5.64776	1.8309	0.176021	5.27993	5.92041	1
vegfd	-3.16958	5.64776	1.8309	0.176021	5.27993	5.92041	1
gpsm1b	-3.16958	5.64771	1.83079	0.176034	5.27993	5.92041	1
spag6	-3.16958	5.64771	1.83079	0.176034	5.27993	5.92041	1
acyp1	-3.16958	5.64771	1.83079	0.176034	5.27993	5.92041	1
dusp23b	-3.16958	5.64771	1.83079	0.176034	5.27993	5.92041	1
katnbl1	-3.16958	5.64771	1.83079	0.176034	5.27993	5.92041	1
si:ch211-119e14.2	-3.16958	5.64757	1.83043	0.176077	5.27993	5.92041	1
ugt5c3	-3.16958	5.64757	1.83043	0.176077	5.27993	5.92041	1
nmt1b	1.78951	6.08192	1.82945	0.176193	6.28083	5.65793	1
pccb	0.837886	7.47773	1.82755	0.176417	7.60316	7.03609	1
wasla	-1.74346	6.18401	1.8274	0.176435	5.60215	6.33429	1
aco2	0.566987	9.8636	1.82682	0.176503	9.91088	9.44846	1
zgc:136929	-1.74282	6.18329	1.82571	0.176635	5.60215	6.33286	1
hectd3	-1.74252	6.18378	1.8254	0.176672	5.60215	6.33286	1
atp6v1d	1.78737	6.08189	1.82504	0.176714	6.28065	5.65793	1
cnih1	1.78737	6.08173	1.82479	0.176744	6.28065	5.65793	1
ugt5g1	1.78736	6.08119	1.82393	0.176846	6.28065	5.65793	1
cct8	0.600671	8.97809	1.81771	0.177586	9.30383	8.82424	1
pkma	0.587567	9.69322	1.81601	0.177788	9.78931	9.31126	1
fam107b	-0.699252	7.95478	1.81108	0.178379	7.28119	7.91939	1
ints10	-3.14367	5.64791	1.8101	0.178496	5.27993	5.91892	1
tmed8	-3.14367	5.64791	1.8101	0.178496	5.27993	5.91892	1
cdc123	-3.14367	5.64776	1.80974	0.17854	5.27993	5.91892	1
gcnt4a	-3.14367	5.64776	1.80974	0.17854	5.27993	5.91892	1
si:ch211-275j6.5	-3.14367	5.64772	1.80963	0.178553	5.27993	5.91892	1
abhd11	-3.14366	5.64762	1.80938	0.178583	5.27993	5.91892	1
cwf19l2	-3.14366	5.64757	1.80927	0.178596	5.27993	5.91892	1
isoc1	-3.14366	5.64757	1.80927	0.178596	5.27993	5.91892	1
hpgd	-3.14366	5.64757	1.80927	0.178596	5.27993	5.91892	1
vps37b	-3.14366	5.64757	1.80927	0.178596	5.27993	5.91892	1
gde1	-3.14366	5.64757	1.80927	0.178596	5.27993	5.91892	1
zgc:153713	-3.14366	5.64757	1.80927	0.178596	5.27993	5.91892	1
nop2	-3.14366	5.6475	1.80909	0.178617	5.27993	5.91892	1
tfeb	-3.14366	5.6475	1.80909	0.178617	5.27993	5.91892	1
apip	-3.14366	5.6475	1.80909	0.178617	5.27993	5.91892	1
praf2	-3.14366	5.6475	1.80909	0.178617	5.27993	5.91892	1
tada2b	-3.14366	5.64746	1.80898	0.17863	5.27993	5.91892	1
efr3a	-3.14365	5.64736	1.80873	0.178661	5.27993	5.91892	1
ndor1	-3.14365	5.64736	1.80873	0.178661	5.27993	5.91892	1
aggf1	-3.14365	5.64736	1.80873	0.178661	5.27993	5.91892	1
sra1	-3.14365	5.64731	1.80862	0.178674	5.27993	5.91892	1
dnajb11	-3.14364	5.64717	1.80826	0.178718	5.27993	5.91892	1
gadd45aa	-3.14364	5.64717	1.80826	0.178718	5.27993	5.91892	1
slc25a47b	-3.14364	5.64717	1.80826	0.178718	5.27993	5.91892	1
si:ch73-110p20.1	-3.14364	5.64717	1.80826	0.178718	5.27993	5.91892	1
ndufb8	0.606896	8.39221	1.80781	0.178771	8.36884	7.91831	1
eif4ebp3l	0.894373	7.59373	1.80427	0.179197	7.36867	6.79768	1
gyg1a	0.913951	7.28107	1.80346	0.179295	7.52923	6.91978	1
zyg11	-1.74687	6.13406	1.79732	0.180037	5.60215	6.33734	1
nup107	-1.74521	6.13353	1.79357	0.180492	5.60215	6.33591	1
exosc10	-1.74465	6.13365	1.79258	0.180612	5.60215	6.33591	1
eif4bb	-1.06905	6.91124	1.79193	0.180691	6.45082	7.24002	1
klf15	-1.74264	6.13328	1.78807	0.181161	5.60215	6.33429	1
pdha1a	0.527249	10.0089	1.7846	0.181586	10.1884	9.76171	1
pde7a	-1.74096	6.13303	1.78455	0.181592	5.60215	6.33286	1
hephl1a	-1.0965	6.68307	1.77454	0.182821	6.28065	7.03468	1
gdi2	0.539583	8.42507	1.7741	0.182875	8.74084	8.33092	1
sart3	-1.44848	6.08118	1.77246	0.183078	5.86538	6.6566	1
etfdh	0.908306	7.25828	1.7606	0.184549	7.52915	6.92255	1
atp5pf	-0.558997	8.47717	1.75986	0.184642	8.18822	8.76696	1
kdelr2a	-1.09937	6.71916	1.75722	0.184972	6.28065	7.03868	1
pdhx	-0.787831	7.6658	1.75497	0.185253	6.98159	7.65845	1
cavin4b	1.50243	6.0268	1.75472	0.185284	6.60272	5.91892	1
pfdn5	-1.07356	7.02641	1.75413	0.185358	6.45082	7.24262	1
si:dkey-205h13.1	-0.959867	7.16134	1.75333	0.185459	6.74041	7.51125	1
mink1	1.15069	6.94188	1.75095	0.185758	6.98148	6.33429	1
bckdha	0.635062	7.77175	1.74743	0.1862	8.03626	7.58145	1
copa	0.911931	6.9132	1.74517	0.186485	7.52923	6.92123	1
psenen	-1.7515	6.08204	1.74443	0.186579	5.60215	6.33895	1
blvra	2.08114	5.85051	1.73967	0.187181	6.45066	5.65793	1
zgc:56064	0.707574	7.51724	1.73909	0.187254	7.92517	7.42325	1
churc1	1.79423	6.02683	1.73734	0.187476	6.28083	5.65641	1
eif3d	0.561972	8.67691	1.73707	0.18751	8.9819	8.54675	1
dlg5a	1.79247	6.02644	1.73307	0.188019	6.28065	5.65641	1
srfb	1.79247	6.02634	1.73287	0.188045	6.28065	5.65641	1
sbds	1.79248	6.02626	1.73269	0.188067	6.28065	5.65641	1
lyar	-1.74551	6.0808	1.73107	0.188274	5.60215	6.33591	1
vars	-1.74451	6.08082	1.72919	0.188514	5.60215	6.33591	1
2023-09-06	-1.0985	6.75293	1.72775	0.188699	6.28065	7.03738	1
mob2b	1.78716	6.0273	1.72507	0.189042	6.28065	5.65793	1
iqgap2	1.78716	6.02725	1.72496	0.189056	6.28065	5.65793	1
atp6v1b2	-1.74231	6.08088	1.72495	0.189057	5.60215	6.33429	1
gapdhs	0.81451	7.84951	1.72375	0.189212	7.45114	6.91846	1
ndufa9a	-0.533222	8.19797	1.72293	0.189316	8.03621	8.5839	1
csnk2a1	0.990676	6.61207	1.72037	0.189646	7.08852	6.5052	1
paf1	-1.73842	6.08016	1.71656	0.190136	5.60215	6.33286	1
rps4x	-0.372796	10.7353	1.71194	0.190734	10.491	10.9369	1
hadhab	-0.605342	8.95849	1.70899	0.191117	8.49087	9.12312	1
zgc:56095	1.18287	6.37175	1.70781	0.19127	6.74041	6.14223	1
trip11	1.18243	6.37142	1.70676	0.191407	6.74041	6.14244	1
si:ch211-51e12.7	0.996667	7.18566	1.70587	0.191522	7.2811	6.65797	1
mrpl54	1.18204	6.37179	1.70556	0.191563	6.74028	6.1439	1
tgfb3	-0.946421	7.16003	1.70409	0.191754	6.74041	7.50516	1
tkfc	1.18231	6.32756	1.70242	0.191972	6.74041	6.1439	1
grpel1	1.18206	6.32726	1.70167	0.192069	6.74041	6.14536	1
gls2b	1.18237	6.49779	1.70123	0.192127	6.74041	6.1439	1
kat6a	0.999784	6.97048	1.70103	0.192154	7.28119	6.65508	1
sf1	0.990034	6.65013	1.69485	0.192963	7.08852	6.50661	1
mapk14b	1.18209	6.53711	1.69377	0.193105	6.74041	6.14536	1
josd1	3.20109	5.5745	1.69331	0.193165	5.86538	5.33493	1
tcp11l1	3.20109	5.57427	1.69277	0.193237	5.86538	5.33493	1
foxp4	3.20109	5.57427	1.69277	0.193237	5.86538	5.33493	1
ulk3	3.20109	5.57427	1.69277	0.193237	5.86538	5.33493	1
fibpb	3.20109	5.57427	1.69277	0.193237	5.86538	5.33493	1
pou2f1b	3.20109	5.57423	1.69267	0.19325	5.86538	5.33493	1
zgc:112334	3.20109	5.57423	1.69267	0.19325	5.86538	5.33493	1
bbc3	3.20109	5.57423	1.69267	0.19325	5.86538	5.33493	1
scamp3	3.20109	5.57423	1.69267	0.19325	5.86538	5.33493	1
clic4	-0.493644	10.1331	1.69238	0.193288	9.77334	10.3274	1
cog4	3.20109	5.57409	1.69231	0.193296	5.86538	5.33493	1
tom1	3.20109	5.57409	1.69231	0.193296	5.86538	5.33493	1
adpgk	3.20109	5.57409	1.69231	0.193296	5.86538	5.33493	1
robo3	3.20109	5.57409	1.69231	0.193296	5.86538	5.33493	1
gkup	3.20109	5.57409	1.69231	0.193296	5.86538	5.33493	1
srek1ip1	3.20109	5.57409	1.69231	0.193296	5.86538	5.33493	1
sobpa	3.20109	5.57409	1.69231	0.193296	5.86538	5.33493	1
canx	-0.948395	7.10862	1.69174	0.193372	6.74041	7.50642	1
mdm1	3.19202	5.57437	1.68647	0.194067	5.86538	5.33493	1
p2rx5	3.19202	5.57437	1.68647	0.194067	5.86538	5.33493	1
greb1l	3.19202	5.57437	1.68647	0.194067	5.86538	5.33493	1
lpcat2	3.19202	5.57437	1.68647	0.194067	5.86538	5.33493	1
slc39a7	3.19202	5.57437	1.68647	0.194067	5.86538	5.33493	1
trim23	3.19202	5.57437	1.68647	0.194067	5.86538	5.33493	1
wdr83	3.19202	5.57437	1.68647	0.194067	5.86538	5.33493	1
ugt5f1	3.19202	5.57437	1.68647	0.194067	5.86538	5.33493	1
vdrb	3.19202	5.57437	1.68647	0.194067	5.86538	5.33493	1
zgc:172090	3.19202	5.57437	1.68647	0.194067	5.86538	5.33493	1
pdia5	3.19202	5.57415	1.68593	0.194138	5.86538	5.33493	1
ddx47	3.19202	5.57415	1.68593	0.194138	5.86538	5.33493	1
fads2	3.19202	5.57415	1.68593	0.194138	5.86538	5.33493	1
afap1l1a	3.19202	5.57415	1.68593	0.194138	5.86538	5.33493	1
stoml2	3.19202	5.57415	1.68593	0.194138	5.86538	5.33493	1
lifrb	3.19202	5.57415	1.68593	0.194138	5.86538	5.33493	1
scamp1	3.19202	5.57415	1.68593	0.194138	5.86538	5.33493	1
aagab	3.19202	5.57415	1.68593	0.194138	5.86538	5.33493	1
wdr74	3.19202	5.57415	1.68593	0.194138	5.86538	5.33493	1
esr1	3.19202	5.57415	1.68593	0.194138	5.86538	5.33493	1
smim1	3.19202	5.57415	1.68593	0.194138	5.86538	5.33493	1
sox6	3.19202	5.57411	1.68583	0.194151	5.86538	5.33493	1
mbd3b	3.19202	5.57411	1.68583	0.194151	5.86538	5.33493	1
borcs8	3.19202	5.57411	1.68583	0.194151	5.86538	5.33493	1
pemt	3.19202	5.57411	1.68583	0.194151	5.86538	5.33493	1
rbm15b	3.19202	5.57411	1.68583	0.194151	5.86538	5.33493	1
sgms1	3.19202	5.57411	1.68583	0.194151	5.86538	5.33493	1
carhsp1	3.19202	5.57411	1.68583	0.194151	5.86538	5.33493	1
tmc1	3.19202	5.57411	1.68583	0.194151	5.86538	5.33493	1
lman2lb	3.19202	5.57411	1.68583	0.194151	5.86538	5.33493	1
pdcd7	3.19202	5.57396	1.68548	0.194198	5.86538	5.33493	1
efcab7	3.19202	5.57396	1.68548	0.194198	5.86538	5.33493	1
gucy1b1	3.19202	5.57396	1.68548	0.194198	5.86538	5.33493	1
bloc1s4	3.19202	5.57396	1.68548	0.194198	5.86538	5.33493	1
zgc:92481	3.19202	5.57396	1.68548	0.194198	5.86538	5.33493	1
bop1	3.19202	5.57396	1.68548	0.194198	5.86538	5.33493	1
impdh2	0.999925	7.08187	1.68279	0.194554	7.28119	6.6566	1
ap1s2	-1.0916	6.78431	1.68108	0.194781	6.28083	7.03197	1
tmppe	3.18293	5.57425	1.67964	0.194972	5.86537	5.33493	1
fgd	3.18293	5.57425	1.67964	0.194972	5.86537	5.33493	1
polr1d	3.18293	5.57425	1.67964	0.194972	5.86537	5.33493	1
fut11	3.18293	5.57425	1.67964	0.194972	5.86537	5.33493	1
entpd2a.1	3.18293	5.57425	1.67964	0.194972	5.86537	5.33493	1
arf4a	3.18293	5.57425	1.67964	0.194972	5.86537	5.33493	1
gatad2b	3.18293	5.57425	1.67964	0.194972	5.86537	5.33493	1
acp7	3.18293	5.57425	1.67964	0.194972	5.86537	5.33493	1
ccr12a	3.18292	5.57402	1.6791	0.195044	5.86537	5.33493	1
fam91a1	3.18292	5.57402	1.6791	0.195044	5.86537	5.33493	1
agtpbp1	3.18292	5.57398	1.679	0.195057	5.86537	5.33493	1
cdkn2aip	3.18292	5.57398	1.679	0.195057	5.86537	5.33493	1
atf7b	3.18292	5.57398	1.679	0.195057	5.86537	5.33493	1
dph6	3.18292	5.57398	1.679	0.195057	5.86537	5.33493	1
ppib	-0.554713	8.51679	1.679	0.195058	8.18826	8.76275	1
tcf7l1b	3.18292	5.57383	1.67865	0.195104	5.86537	5.33493	1
mrpl42	3.18292	5.57383	1.67865	0.195104	5.86537	5.33493	1
slc31a2	3.18292	5.57383	1.67865	0.195104	5.86537	5.33493	1
impad1	3.18292	5.57383	1.67865	0.195104	5.86537	5.33493	1
dnajb9a	3.18292	5.57383	1.67865	0.195104	5.86537	5.33493	1
chic2	3.18292	5.57383	1.67865	0.195104	5.86537	5.33493	1
zgc:113210	3.18292	5.57383	1.67865	0.195104	5.86537	5.33493	1
atraid	3.18292	5.57383	1.67865	0.195104	5.86537	5.33493	1
ccdc85ca	-2.04821	5.84947	1.67526	0.195555	5.60215	6.5052	1
stk26	1.18314	6.23383	1.6746	0.195644	6.74041	6.14223	1
galk2	-3.1988	5.57462	1.67441	0.195669	5.27993	5.92215	1
tmem209	-3.1988	5.5744	1.67388	0.19574	5.27993	5.92215	1
rabl3	-3.1988	5.5744	1.67388	0.19574	5.27993	5.92215	1
apoob	-3.1988	5.5744	1.67388	0.19574	5.27993	5.92215	1
numb	-3.1988	5.5744	1.67388	0.19574	5.27993	5.92215	1
cptp	-3.1988	5.5744	1.67388	0.19574	5.27993	5.92215	1
dync1li2	-3.1988	5.57435	1.67378	0.195753	5.27993	5.92215	1
wdr55	-3.1988	5.57435	1.67378	0.195753	5.27993	5.92215	1
wrap53	-3.1988	5.57435	1.67378	0.195753	5.27993	5.92215	1
ccdc6b	-3.1988	5.57435	1.67378	0.195753	5.27993	5.92215	1
gmeb1	-3.1988	5.57435	1.67378	0.195753	5.27993	5.92215	1
nxpe3	-3.19881	5.57421	1.67344	0.195799	5.27993	5.92215	1
mhc1zja	-3.19881	5.57421	1.67344	0.195799	5.27993	5.92215	1
hdhd3	-3.19881	5.57421	1.67344	0.195799	5.27993	5.92215	1
ube2a	0.990724	6.68427	1.6727	0.195897	7.08852	6.5052	1
stk10	1.18219	6.23389	1.67219	0.195965	6.74041	6.1439	1
cbx1a	1.18203	6.23439	1.67205	0.195985	6.74041	6.1439	1
coa3a	1.18152	6.23466	1.67079	0.196152	6.74041	6.14536	1
aldoab	0.371341	10.7206	1.66239	0.197281	10.8129	10.5304	1
selenoj	0.907034	7.02714	1.66088	0.197485	7.52915	6.92255	1
glud1b	-0.554403	8.35971	1.65891	0.19775	7.98181	8.54764	1
popdc3	-1.75527	6.02773	1.6571	0.197996	5.60215	6.33895	1
pcdh1g18	-3.16117	5.57594	1.65317	0.198528	5.27993	5.92657	1
mlf1	0.895883	6.78757	1.65297	0.198555	7.36867	6.79633	1
si:dkey-78l4.14	-0.788641	7.51739	1.65239	0.198634	6.98148	7.65967	1
eif4enif1	-3.16967	5.57414	1.65236	0.198638	5.27993	5.92041	1
adipor1b	-3.16967	5.57414	1.65236	0.198638	5.27993	5.92041	1
vars2	-3.16967	5.57414	1.65236	0.198638	5.27993	5.92041	1
jam2a	-3.16967	5.57414	1.65236	0.198638	5.27993	5.92041	1
shcbp1	-3.16967	5.57414	1.65236	0.198638	5.27993	5.92041	1
hiat1a	-3.16967	5.57414	1.65236	0.198638	5.27993	5.92041	1
gna13a	-3.16967	5.57414	1.65236	0.198638	5.27993	5.92041	1
camsap1a	-3.16967	5.57414	1.65236	0.198638	5.27993	5.92041	1
chl1a	-3.16967	5.57414	1.65236	0.198638	5.27993	5.92041	1
ergic3	-3.16967	5.57392	1.65183	0.19871	5.27993	5.92041	1
il15	-3.16967	5.57392	1.65183	0.19871	5.27993	5.92041	1
acot8	-3.16967	5.57392	1.65183	0.19871	5.27993	5.92041	1
cxcl20	-3.16967	5.57392	1.65183	0.19871	5.27993	5.92041	1
ext1a	-3.16967	5.57392	1.65183	0.19871	5.27993	5.92041	1
yif1b	-3.16967	5.57392	1.65183	0.19871	5.27993	5.92041	1
tbrg1	-3.16967	5.57392	1.65183	0.19871	5.27993	5.92041	1
fam173b	-3.16967	5.57392	1.65183	0.19871	5.27993	5.92041	1
tspan37	-3.16967	5.57388	1.65174	0.198723	5.27993	5.92041	1
ptrh2	-3.16967	5.57388	1.65174	0.198723	5.27993	5.92041	1
ifit8	-3.16967	5.57388	1.65174	0.198723	5.27993	5.92041	1
cdh1	-3.16967	5.57388	1.65174	0.198723	5.27993	5.92041	1
gabpb1	-3.16967	5.57388	1.65174	0.198723	5.27993	5.92041	1
tia1	-3.16967	5.57373	1.65139	0.198769	5.27993	5.92041	1
extl2	-3.16967	5.57373	1.65139	0.198769	5.27993	5.92041	1
ndc1	-3.16967	5.57373	1.65139	0.198769	5.27993	5.92041	1
rrp7a	-3.16967	5.57373	1.65139	0.198769	5.27993	5.92041	1
g6pc3	-3.16967	5.57373	1.65139	0.198769	5.27993	5.92041	1
kif22	-3.16967	5.57373	1.65139	0.198769	5.27993	5.92041	1
becn1	-3.16967	5.57373	1.65139	0.198769	5.27993	5.92041	1
scly	-3.16967	5.57373	1.65139	0.198769	5.27993	5.92041	1
ubac2	-3.16967	5.57373	1.65139	0.198769	5.27993	5.92041	1
usp12a	-2.03224	5.84913	1.64853	0.199159	5.60215	6.50364	1
mrpl17	-1.75045	6.02739	1.64756	0.199291	5.60215	6.33734	1
zgc:92242	-1.75045	6.02721	1.64721	0.199339	5.60215	6.33734	1
dcaf7	0.990925	6.71932	1.64533	0.199596	7.08842	6.5052	1
sptan1	0.485831	10.1315	1.64497	0.199644	10.2588	9.87131	1
eif4a3	1.18335	6.6837	1.6447	0.199682	6.74041	6.14223	1
lrrc8c	-1.45561	6.02717	1.64351	0.199844	5.86538	6.65949	1
insra	0.836849	7.30473	1.64017	0.200302	7.60316	7.03738	1
timm50	-1.74595	6.02689	1.63848	0.200533	5.60215	6.33591	1
ankrd13c	-1.74595	6.02668	1.63807	0.200591	5.60215	6.33591	1
sema3gb	1.18312	6.18493	1.6366	0.200792	6.74041	6.14223	1
ypel5	-1.74427	6.02707	1.63582	0.2009	5.60215	6.33591	1
aqp1a.1	0.891376	6.78854	1.6354	0.200958	7.36867	6.79903	1
ndufs4	-0.860259	7.32608	1.6354	0.200958	6.86597	7.58261	1
coq5	-1.45128	6.02679	1.6327	0.20133	5.86538	6.65797	1
rap2b	1.18117	6.18518	1.63181	0.201452	6.74041	6.1439	1
sox7	1.18082	6.18561	1.63127	0.201527	6.74041	6.14536	1
diabloa	-3.14091	5.57374	1.63111	0.201549	5.27993	5.91892	1
exoc4	-3.14091	5.57374	1.63111	0.201549	5.27993	5.91892	1
ppt2	-3.14091	5.57374	1.63111	0.201549	5.27993	5.91892	1
babam2	-3.14091	5.57374	1.63111	0.201549	5.27993	5.91892	1
col4a5	-3.14091	5.57374	1.63111	0.201549	5.27993	5.91892	1
ppp1r11	-3.14091	5.57374	1.63111	0.201549	5.27993	5.91892	1
spi1a	-3.14091	5.57374	1.63111	0.201549	5.27993	5.91892	1
psmd10	-3.1409	5.57352	1.63059	0.201621	5.27993	5.91892	1
zgc:162958	-3.1409	5.57352	1.63059	0.201621	5.27993	5.91892	1
ttbk2b	-3.1409	5.57352	1.63059	0.201621	5.27993	5.91892	1
nell2a	-3.1409	5.57348	1.6305	0.201634	5.27993	5.91892	1
kbtbd8	-3.1409	5.57348	1.6305	0.201634	5.27993	5.91892	1
brf1a	-3.1409	5.57348	1.6305	0.201634	5.27993	5.91892	1
pwp2h	-3.1409	5.57348	1.6305	0.201634	5.27993	5.91892	1
nup133	-3.1409	5.57348	1.6305	0.201634	5.27993	5.91892	1
lyn	-3.1409	5.57333	1.63016	0.201681	5.27993	5.91892	1
unk	-3.1409	5.57333	1.63016	0.201681	5.27993	5.91892	1
khk	-3.1409	5.57333	1.63016	0.201681	5.27993	5.91892	1
si:dkeyp-92c9.3	-3.1409	5.57333	1.63016	0.201681	5.27993	5.91892	1
ecd	-3.1409	5.57333	1.63016	0.201681	5.27993	5.91892	1
stt3b	-1.44969	6.02685	1.62938	0.201788	5.86538	6.65797	1
mef2aa	1.1838	6.71945	1.62687	0.202137	6.74041	6.14223	1
wbp11	-1.73654	6.02592	1.61956	0.203153	5.60215	6.33286	1
prox1a	1.18323	6.75303	1.60598	0.205057	6.74041	6.14223	1
sucla2	0.558434	8.27924	1.60476	0.20523	8.32577	7.91718	1
stt3a	0.576061	7.86724	1.60392	0.205349	8.13941	7.72716	1
usp6nl	1.79398	5.97081	1.60187	0.205639	6.28065	5.65641	1
upf3b	-0.861908	7.28094	1.60148	0.205693	6.86597	7.58386	1
lrp6	1.79399	5.97057	1.60124	0.205728	6.28065	5.65641	1
ppm1k	1.79399	5.97037	1.60072	0.205801	6.28065	5.65641	1
vps37a	1.79401	5.97	1.59976	0.205938	6.28065	5.65641	1
mul1a	1.79401	5.9698	1.59924	0.206011	6.28065	5.65641	1
atp5f1d	-0.583918	9.35548	1.59762	0.206241	8.8664	9.48963	1
ppl	1.7919	5.97026	1.59688	0.206346	6.28065	5.65641	1
pkd2	1.7919	5.97026	1.59688	0.206346	6.28065	5.65641	1
rtn1a	-0.555832	8.7933	1.59531	0.206569	8.52934	9.11653	1
amd1	-0.532087	8.1849	1.59158	0.2071	7.92517	8.46842	1
ccnd1	1.78798	5.97067	1.59134	0.207135	6.28083	5.65793	1
nrap	0.576629	8.0689	1.59086	0.207203	8.13936	7.72484	1
tollip	1.78556	5.9709	1.58771	0.207654	6.28065	5.65793	1
dbpb	1.78554	5.97049	1.58659	0.207813	6.28065	5.65793	1
ywhag1	1.78554	5.97034	1.58618	0.207873	6.28065	5.65793	1
etv5b	1.78554	5.97019	1.58579	0.207928	6.28065	5.65793	1
vdac1	0.486498	8.31669	1.58569	0.207943	8.74087	8.37973	1
fzd6	1.78347	5.97082	1.58395	0.208193	6.28065	5.65793	1
hccsb	0.989649	6.78621	1.58347	0.208262	7.08842	6.50661	1
itga9	1.78343	5.96998	1.58168	0.208519	6.28065	5.65793	1
b2ml	-0.502154	9.92297	1.57977	0.208794	9.77335	10.3368	1
gatb	1.78137	5.97053	1.57963	0.208815	6.28065	5.65793	1
pank1a	1.18045	6.78629	1.57899	0.208906	6.74041	6.1439	1
fmr1	1.78135	5.97015	1.57858	0.208965	6.28065	5.65793	1
aldocb	0.549447	8.76293	1.57773	0.209088	9.00938	8.58478	1
rps25	-0.410216	10.432	1.57565	0.209388	10.3368	10.8152	1
wdr1	-0.723117	7.62924	1.57275	0.209808	7.08842	7.72372	1
tax1bp1b	0.547219	8.517	1.56969	0.210252	8.60334	8.19521	1
pls3	1.18388	6.81828	1.56855	0.210417	6.74041	6.14223	1
kdm5ba	-0.86244	7.23496	1.56715	0.210622	6.86598	7.58502	1
rpn2	-1.1336	6.456	1.56321	0.211196	6.0879	6.79485	1
zgc:152816	-1.13417	6.3265	1.56202	0.211369	6.0879	6.79768	1
scn5lab	-1.13398	6.32644	1.56151	0.211444	6.0879	6.79633	1
adcy5	-1.13392	6.32688	1.5614	0.21146	6.08791	6.79633	1
tp53bp1	0.991198	6.81894	1.55991	0.211678	7.08842	6.5052	1
rnf14	-1.13335	6.32644	1.55969	0.211711	6.08791	6.79351	1
fzd10	1.50455	5.97026	1.55857	0.211874	6.60272	5.91892	1
ndufa12	-0.551954	8.02625	1.55801	0.211956	7.74067	8.28653	1
kpna4	-0.95327	6.94256	1.55796	0.211965	6.60272	7.34024	1
tle2a	1.50252	5.97108	1.55753	0.212027	6.60287	5.92041	1
acss1	-1.1344	6.53634	1.55558	0.212313	6.0879	6.79768	1
lrrc39	0.634236	7.88172	1.5468	0.213609	7.86357	7.42455	1
tmem88b	-0.725798	7.57388	1.54668	0.213626	7.08852	7.72829	1
mrps33	-1.13356	6.57415	1.54484	0.213898	6.0879	6.79485	1
psmd1	-1.13288	6.57391	1.54329	0.214129	6.08811	6.79485	1
sf3a2	-1.13287	6.5742	1.54322	0.21414	6.08811	6.79485	1
erg	-0.94713	6.94185	1.53844	0.21485	6.60272	7.33637	1
trim3b	0.992353	6.85042	1.53733	0.215016	7.08842	6.5052	1
nedd9	-1.13456	6.23432	1.53607	0.215203	6.08791	6.79768	1
apobec2b	1.0326	6.44099	1.53488	0.215381	6.85972	6.3057	1
laptm4a	-0.94235	7.20857	1.53398	0.215517	6.60287	7.33392	1
thoc2	-1.13337	6.61094	1.5336	0.215572	6.08791	6.79485	1
rps23	-0.384996	10.5377	1.5317	0.215857	10.4313	10.8865	1
vps16	-1.13301	6.23266	1.531	0.215962	6.0879	6.79351	1
ankfy1	-1.13285	6.23258	1.53052	0.216034	6.08791	6.79351	1
txlnbb	0.513814	8.1606	1.52981	0.21614	8.41065	8.04033	1
ppp6r3	-0.94025	6.64816	1.52653	0.216634	6.45066	7.14241	1
preb	-1.7532	5.97005	1.52178	0.21735	5.60215	6.33734	1
tspan7	-1.13328	6.64771	1.52001	0.217618	6.08791	6.79485	1
fam136a	-1.75049	5.9708	1.51914	0.21775	5.60215	6.33734	1
uspl1	-1.75049	5.97076	1.51904	0.217765	5.60215	6.33734	1
socs3b	-1.75049	5.97076	1.51904	0.217765	5.60215	6.33734	1
usp25	0.898886	6.94194	1.51356	0.218596	7.36867	6.79351	1
nck2a	3.20182	5.49624	1.5131	0.218667	5.86538	5.33493	1
pola2	3.20182	5.49624	1.5131	0.218667	5.86538	5.33493	1
nufip1	3.20182	5.49624	1.5131	0.218667	5.86538	5.33493	1
ciz1b	3.20182	5.49624	1.5131	0.218667	5.86538	5.33493	1
kmt5c	3.20182	5.49624	1.5131	0.218667	5.86538	5.33493	1
slc17a9b	3.20182	5.49624	1.5131	0.218667	5.86538	5.33493	1
zgc:162872	3.20182	5.49624	1.5131	0.218667	5.86538	5.33493	1
si:ch211-197h24.9	3.20182	5.49624	1.5131	0.218667	5.86538	5.33493	1
col27a1a	3.20182	5.49624	1.5131	0.218667	5.86538	5.33493	1
ephb2b	3.20182	5.49624	1.5131	0.218667	5.86538	5.33493	1
sema3bl	3.20182	5.49624	1.5131	0.218667	5.86538	5.33493	1
nsmce2	3.20182	5.49624	1.5131	0.218667	5.86538	5.33493	1
mhc1zea	3.20182	5.49624	1.5131	0.218667	5.86538	5.33493	1
cbsa	3.20182	5.49624	1.5131	0.218667	5.86538	5.33493	1
syngr2b	3.20182	5.49624	1.5131	0.218667	5.86538	5.33493	1
mtx1a	3.20182	5.49624	1.5131	0.218667	5.86538	5.33493	1
slc9a1b	3.20182	5.49624	1.5131	0.218667	5.86538	5.33493	1
scara5	3.20182	5.49624	1.5131	0.218667	5.86538	5.33493	1
angptl1a	3.20182	5.49624	1.5131	0.218667	5.86538	5.33493	1
ela2	3.19203	5.49612	1.50682	0.219624	5.86538	5.33493	1
pop4	3.19203	5.49612	1.50682	0.219624	5.86538	5.33493	1
zgc:153044	3.19203	5.49612	1.50682	0.219624	5.86538	5.33493	1
mapk1	3.19203	5.49612	1.50682	0.219624	5.86538	5.33493	1
kin	3.19203	5.49612	1.50682	0.219624	5.86538	5.33493	1
chrm2a	3.19203	5.49612	1.50682	0.219624	5.86538	5.33493	1
zgc:174931	3.19203	5.49612	1.50682	0.219624	5.86538	5.33493	1
nsun4	3.19203	5.49612	1.50682	0.219624	5.86538	5.33493	1
ripk2	3.19203	5.49612	1.50682	0.219624	5.86538	5.33493	1
znf1174	3.19203	5.49612	1.50682	0.219624	5.86538	5.33493	1
limk1a	3.19203	5.49612	1.50682	0.219624	5.86538	5.33493	1
cep57l1	3.19203	5.49612	1.50682	0.219624	5.86538	5.33493	1
fam199x	3.19203	5.49612	1.50682	0.219624	5.86538	5.33493	1
med7	3.19203	5.49612	1.50682	0.219624	5.86538	5.33493	1
wdr18	3.19203	5.49612	1.50682	0.219624	5.86538	5.33493	1
cd7al	3.19203	5.49612	1.50682	0.219624	5.86538	5.33493	1
bcam	3.19203	5.49612	1.50682	0.219624	5.86538	5.33493	1
rpz3	3.19203	5.49612	1.50682	0.219624	5.86538	5.33493	1
kiz	3.19203	5.49612	1.50682	0.219624	5.86538	5.33493	1
ythdf2	3.19203	5.49612	1.50682	0.219624	5.86538	5.33493	1
slc33a1	3.19203	5.49612	1.50682	0.219624	5.86538	5.33493	1
nprl3	3.19203	5.49612	1.50682	0.219624	5.86538	5.33493	1
kctd13	3.19203	5.49612	1.50682	0.219624	5.86538	5.33493	1
fam84a	3.19203	5.49612	1.50682	0.219624	5.86538	5.33493	1
tes	-1.74389	5.97007	1.50641	0.219688	5.60215	6.33591	1
plekhj1	-1.13512	6.18549	1.5031	0.220195	6.08791	6.79768	1
atp1a1b	3.1822	5.49599	1.50055	0.220587	5.86537	5.33493	1
nr2f1a	3.1822	5.49599	1.50055	0.220587	5.86537	5.33493	1
zgc:112148	3.1822	5.49599	1.50055	0.220587	5.86537	5.33493	1
uggt1	3.1822	5.49599	1.50055	0.220587	5.86537	5.33493	1
zgc:91849	3.1822	5.49599	1.50055	0.220587	5.86537	5.33493	1
si:dkey-19a16.4	3.1822	5.49599	1.50055	0.220587	5.86537	5.33493	1
pex16	3.1822	5.49599	1.50055	0.220587	5.86537	5.33493	1
zmp:0000000758	3.1822	5.49599	1.50055	0.220587	5.86537	5.33493	1
igf1ra	3.1822	5.49599	1.50055	0.220587	5.86537	5.33493	1
klc1a	3.1822	5.49599	1.50055	0.220587	5.86537	5.33493	1
dnaja3b	3.1822	5.49599	1.50055	0.220587	5.86537	5.33493	1
pex11a	3.1822	5.49599	1.50055	0.220587	5.86537	5.33493	1
ttc26	3.1822	5.49599	1.50055	0.220587	5.86537	5.33493	1
elp3	3.1822	5.49599	1.50055	0.220587	5.86537	5.33493	1
and1	3.1822	5.49599	1.50055	0.220587	5.86537	5.33493	1
cdkn3	3.1822	5.49599	1.50055	0.220587	5.86537	5.33493	1
dgat1a	3.1822	5.49599	1.50055	0.220587	5.86537	5.33493	1
def6a	3.1822	5.49599	1.50055	0.220587	5.86537	5.33493	1
ankrd16	3.1822	5.49599	1.50055	0.220587	5.86537	5.33493	1
trmt10b	-3.2011	5.49637	1.49822	0.220945	5.27993	5.92215	1
imp4	-3.2011	5.49637	1.49822	0.220945	5.27993	5.92215	1
ptgs2a	-3.2011	5.49637	1.49822	0.220945	5.27993	5.92215	1
fbxo45	-3.2011	5.49637	1.49822	0.220945	5.27993	5.92215	1
rex1bd	-3.2011	5.49637	1.49822	0.220945	5.27993	5.92215	1
zgc:153704	-3.2011	5.49637	1.49822	0.220945	5.27993	5.92215	1
yif1a	-3.2011	5.49637	1.49822	0.220945	5.27993	5.92215	1
gorab	-3.2011	5.49637	1.49822	0.220945	5.27993	5.92215	1
fbxl2	-3.2011	5.49637	1.49822	0.220945	5.27993	5.92215	1
zcchc17	-3.2011	5.49637	1.49822	0.220945	5.27993	5.92215	1
lig4	-3.2011	5.49637	1.49822	0.220945	5.27993	5.92215	1
mfsd4b	-3.2011	5.49637	1.49822	0.220945	5.27993	5.92215	1
ttc32	-3.2011	5.49637	1.49822	0.220945	5.27993	5.92215	1
gmfb	-1.73961	5.96927	1.49726	0.221093	5.60215	6.33429	1
adssl	-1.7396	5.96907	1.49676	0.221171	5.60215	6.33429	1
tnfaip2a	-1.73693	5.96989	1.49438	0.221538	5.60215	6.33429	1
znf598	-1.13223	6.18417	1.4943	0.22155	6.08791	6.79351	1
rbmx	-1.73693	5.96978	1.49409	0.221582	5.60215	6.33429	1
sp2	-1.7369	5.96919	1.49261	0.221813	5.60215	6.33429	1
zcchc24	0.989853	6.91212	1.48581	0.222868	7.08842	6.50661	1
rps10	-0.428893	10.3121	1.48437	0.223093	9.99579	10.4935	1
plod2	-1.73029	5.96937	1.48223	0.223426	5.60215	6.33286	1
gpm6bb	-3.16974	5.49589	1.47803	0.224083	5.27993	5.92041	1
si:ch211-157p22.10	-3.16974	5.49589	1.47803	0.224083	5.27993	5.92041	1
ctu1	-3.16974	5.49589	1.47803	0.224083	5.27993	5.92041	1
pde5ab	-3.16974	5.49589	1.47803	0.224083	5.27993	5.92041	1
asf1ba	-3.16974	5.49589	1.47803	0.224083	5.27993	5.92041	1
tmem98	-3.16974	5.49589	1.47803	0.224083	5.27993	5.92041	1
them6	-3.16974	5.49589	1.47803	0.224083	5.27993	5.92041	1
pls1	-3.16974	5.49589	1.47803	0.224083	5.27993	5.92041	1
uck2b	-3.16974	5.49589	1.47803	0.224083	5.27993	5.92041	1
tgfbr1b	-3.16974	5.49589	1.47803	0.224083	5.27993	5.92041	1
pmepa1	-3.16974	5.49589	1.47803	0.224083	5.27993	5.92041	1
mybpc1	-3.16974	5.49589	1.47803	0.224083	5.27993	5.92041	1
zgc:194285	-3.16974	5.49589	1.47803	0.224083	5.27993	5.92041	1
lix1l	-3.16974	5.49589	1.47803	0.224083	5.27993	5.92041	1
cpvl	-3.16974	5.49589	1.47803	0.224083	5.27993	5.92041	1
ttc4	-3.16974	5.49589	1.47803	0.224083	5.27993	5.92041	1
chid1	-3.16974	5.49589	1.47803	0.224083	5.27993	5.92041	1
prkg1a	-3.16974	5.49589	1.47803	0.224083	5.27993	5.92041	1
prrc1	-3.16974	5.49589	1.47803	0.224083	5.27993	5.92041	1
rap1gap2a	-3.16974	5.49589	1.47803	0.224083	5.27993	5.92041	1
hdac10	-3.16974	5.49589	1.47803	0.224083	5.27993	5.92041	1
ap4m1	-3.16974	5.49589	1.47803	0.224083	5.27993	5.92041	1
smyd5	-3.16974	5.49589	1.47803	0.224083	5.27993	5.92041	1
smpd1	-3.16974	5.49589	1.47803	0.224083	5.27993	5.92041	1
b4galt7	-3.16974	5.49589	1.47803	0.224083	5.27993	5.92041	1
bloc1s3	-3.16974	5.49589	1.47803	0.224083	5.27993	5.92041	1
il17rd	-3.16974	5.49589	1.47803	0.224083	5.27993	5.92041	1
ptprna	-3.16974	5.49589	1.47803	0.224083	5.27993	5.92041	1
ptpreb	-3.16974	5.49589	1.47803	0.224083	5.27993	5.92041	1
rufy2	-3.16974	5.49589	1.47803	0.224083	5.27993	5.92041	1
ugt5c2	-3.16974	5.49589	1.47803	0.224083	5.27993	5.92041	1
e2f3	-3.16974	5.49589	1.47803	0.224083	5.27993	5.92041	1
setdb2	-3.16974	5.49589	1.47803	0.224083	5.27993	5.92041	1
cx32.2	-3.16974	5.49589	1.47803	0.224083	5.27993	5.92041	1
setb	-0.724269	7.49635	1.47681	0.224274	7.08842	7.72716	1
mat2aa	0.894198	7.13429	1.47628	0.224358	7.36867	6.79485	1
dars	-0.528438	8.09501	1.47153	0.225104	7.80481	8.33774	1
glyctk	1.18286	6.08251	1.46593	0.225988	6.74041	6.1439	1
zgc:136564	-3.13864	5.49549	1.45847	0.227173	5.27993	5.91892	1
si:busm1-194e12.11	-3.13864	5.49549	1.45847	0.227173	5.27993	5.91892	1
si:dkey-281i8.1	-3.13864	5.49549	1.45847	0.227173	5.27993	5.91892	1
nfatc2ip	-3.13864	5.49549	1.45847	0.227173	5.27993	5.91892	1
ptgdsb.1	-3.13864	5.49549	1.45847	0.227173	5.27993	5.91892	1
plp2	-3.13864	5.49549	1.45847	0.227173	5.27993	5.91892	1
anapc5	-3.13864	5.49549	1.45847	0.227173	5.27993	5.91892	1
ugcg	-3.13864	5.49549	1.45847	0.227173	5.27993	5.91892	1
slc12a2	-3.13864	5.49549	1.45847	0.227173	5.27993	5.91892	1
rbm18	-3.13864	5.49549	1.45847	0.227173	5.27993	5.91892	1
zgc:158423	-3.13864	5.49549	1.45847	0.227173	5.27993	5.91892	1
ches1	-3.13864	5.49549	1.45847	0.227173	5.27993	5.91892	1
rb1	-3.13864	5.49549	1.45847	0.227173	5.27993	5.91892	1
lhfpl2a	-3.13864	5.49549	1.45847	0.227173	5.27993	5.91892	1
eif4ea	-3.13864	5.49549	1.45847	0.227173	5.27993	5.91892	1
slc12a3	-3.13864	5.49549	1.45847	0.227173	5.27993	5.91892	1
necab2	-3.13864	5.49549	1.45847	0.227173	5.27993	5.91892	1
ugt1b2	-3.13864	5.49549	1.45847	0.227173	5.27993	5.91892	1
elmod2	-3.13864	5.49549	1.45847	0.227173	5.27993	5.91892	1
mri1	-3.13864	5.49549	1.45847	0.227173	5.27993	5.91892	1
cfbl	-3.13864	5.49549	1.45847	0.227173	5.27993	5.91892	1
cxcl12b	0.990311	7.13384	1.45396	0.227894	7.08852	6.5052	1
ywhabl	-0.510018	8.28177	1.44955	0.2286	7.98181	8.50767	1
2023-09-03	1.802	5.91197	1.44714	0.228987	6.28083	5.65641	1
creg1	0.449325	8.31706	1.44631	0.22912	8.83602	8.50492	1
hmox1a	1.79919	5.91183	1.44242	0.229749	6.28083	5.65641	1
trappc2	1.79604	5.91146	1.43639	0.230725	6.28065	5.65641	1
sbk3	1.79606	5.91109	1.43532	0.230899	6.28065	5.65641	1
fxr2	-0.673012	7.59334	1.43454	0.231024	7.18807	7.79605	1
tuba8l3	-1.13355	6.81863	1.43452	0.231028	6.08811	6.79633	1
ndufa4l	0.475047	10.0457	1.43333	0.231222	10.023	9.64469	1
dachd	0.871844	6.72146	1.43163	0.231498	7.18807	6.66087	1
sept7b	-0.941579	6.78619	1.43047	0.231687	6.45066	7.14368	1
eef1da	-0.521824	9.55774	1.43032	0.231713	9.36896	9.94392	1
rpl32	-0.392213	10.4572	1.42511	0.232565	10.1884	10.6507	1
myh11a	-0.673177	7.57581	1.42274	0.232953	7.18798	7.79716	1
sec22a	1.78656	5.91172	1.42264	0.232969	6.28083	5.65793	1
exoc6	1.78655	5.91158	1.42221	0.23304	6.28083	5.65793	1
hnrnpul1	0.982447	6.41421	1.42196	0.233081	6.86598	6.33429	1
slc30a9	0.982591	6.3716	1.42166	0.23313	6.86598	6.33429	1
sap30l	0.723076	7.3506	1.42034	0.233348	7.74074	7.24387	1
plscr3b	0.982367	6.45531	1.41999	0.233406	6.86597	6.33429	1
rnf141	0.981921	6.45635	1.41879	0.233603	6.86598	6.33591	1
ift172	1.7834	5.91187	1.4182	0.2337	6.28065	5.65793	1
ube2g1a	1.78338	5.91148	1.41703	0.233893	6.28065	5.65793	1
srpk1a	0.982633	6.49634	1.41657	0.233969	6.86598	6.33429	1
dicer1	0.981663	6.3275	1.41512	0.234208	6.86597	6.33734	1
twf2b	0.982095	6.49776	1.415	0.234228	6.86598	6.33591	1
itgb1a	0.875017	6.75407	1.41431	0.234343	7.18798	6.6566	1
cfdp1	1.78056	5.91146	1.4127	0.234609	6.28065	5.65793	1
ndufb5	-0.551542	7.94072	1.40329	0.236174	7.60323	8.142	1
chac1	-0.84863	7.28183	1.40098	0.236559	6.74041	7.42705	1
eif4ebp1	0.571735	7.83426	1.40091	0.236571	7.98176	7.57904	1
cebpd	-0.762641	7.53513	1.40089	0.236575	6.86598	7.50516	1
plvapb	2.3416	6.18515	1.4003	0.236673	5.60215	5.33493	1
svila	0.570493	7.8813	1.39979	0.236758	7.98176	7.58502	1
ndufaf3	-0.763816	7.51563	1.39256	0.237973	6.86598	7.50642	1
selenow1	-0.558613	9.18398	1.38895	0.238582	8.60334	9.19712	1
ctdsp2	0.63852	7.51605	1.38755	0.23882	7.86621	7.42084	1
cav2	-1.13128	6.91142	1.38403	0.239416	6.08811	6.79485	1
ppp1r13bb	-0.942058	6.85141	1.38222	0.239724	6.45082	7.14495	1
fam207a	1.2474	6.41383	1.37801	0.24044	6.45082	5.92041	1
elof1	0.984012	6.6482	1.37787	0.240464	6.86598	6.33286	1
u2af2b	1.24745	6.37127	1.37771	0.240492	6.45082	5.92041	1
tnksb	1.24708	6.45584	1.37618	0.240752	6.45066	5.92041	1
slit3	1.2463	6.37135	1.37535	0.240895	6.45066	5.92215	1
boc	2.3426	6.0268	1.37499	0.240956	5.60215	5.33493	1
popdc2	-0.501403	9.65469	1.37468	0.241009	9.50055	10.0587	1
ube2g1b	1.24624	6.45617	1.3746	0.241022	6.45066	5.92215	1
herpud2	1.24708	6.32702	1.37446	0.241046	6.45066	5.92041	1
fgfr2	1.24611	6.49626	1.37204	0.241462	6.45066	5.92215	1
ddx23	1.24751	6.53609	1.37114	0.241615	6.45082	5.92041	1
asb8	1.24782	6.28059	1.37053	0.241721	6.45082	5.91892	1
dmtn	1.24752	6.28165	1.37008	0.241798	6.45082	5.92041	1
mrps27	0.981279	6.6493	1.37005	0.241804	6.86598	6.33734	1
pmpcb	1.24706	6.53626	1.37004	0.241805	6.45066	5.92041	1
h2afvb	1.24743	6.28113	1.3698	0.241847	6.45082	5.92041	1
clptm1	1.24706	6.28096	1.36885	0.242009	6.45066	5.92041	1
rorab	1.24706	6.28075	1.36881	0.242016	6.45066	5.92041	1
cib1	-1.75629	5.91154	1.36875	0.242027	5.60215	6.33734	1
arglu1a	0.980864	6.64989	1.36866	0.242043	6.86597	6.33734	1
ccl25b	1.24687	6.28116	1.36849	0.242071	6.45066	5.92041	1
nadkb	-1.75631	5.91125	1.36796	0.242163	5.60215	6.33734	1
zgc:113054	-1.75227	5.91185	1.3636	0.242914	5.60215	6.33734	1
mrps21	-1.75227	5.91178	1.36339	0.242951	5.60215	6.33734	1
mrrf	-1.75228	5.91166	1.36307	0.243006	5.60215	6.33734	1
ndrg3a	-0.845834	7.23385	1.36231	0.243138	6.74041	7.42455	1
mgst3b	-0.941923	6.8806	1.36176	0.243233	6.45066	7.14368	1
hsp70.3	2.61635	5.6669	1.35981	0.243571	5.67746	5.33493	1
rpl5b	0.321892	10.7669	1.35835	0.243824	10.9889	10.753	1
hif1aa	1.2463	6.23383	1.35626	0.244186	6.45082	5.92215	1
mapkapk2a	0.981678	6.68376	1.35499	0.244407	6.86598	6.33591	1
sub1a	0.981677	6.68418	1.35478	0.244444	6.86598	6.33591	1
abcd3a	0.981677	6.68426	1.35474	0.244451	6.86598	6.33591	1
h1fx	0.873438	6.81944	1.35362	0.244646	7.18798	6.65797	1
gstk4	2.34042	5.97018	1.35345	0.244675	5.60215	5.33493	1
ctps1b	2.34042	5.97003	1.35339	0.244687	5.60215	5.33493	1
lamp1b	2.34041	5.96944	1.35314	0.24473	5.60215	5.33493	1
[truncated: 8,001 more rows]

## Sheet: WT vs abanrf2 double mutant
	logFC	logCPM	LR	PValue	Test_logCPM	control_logCPM	FDR
hbaa1	-2.29765	12.71	291.385	2.482e-65	10.3918	12.6158	3.76395e-61
acta1b	0.710477	12.655	65.834	4.90544e-16	13.2617	12.5171	3.71955e-12
nme2b.2	-1.20197	11.6411	47.9163	4.44806e-12	10.5899	11.7335	2.2485e-08
tnnc1a	0.810671	12.0103	44.6563	2.34845e-11	12.2031	11.3635	8.90355e-08
actn2b	0.77194	12.9631	43.6021	4.02404e-11	13.3442	12.538	1.22049e-07
hbba1	-1.04535	13.2654	43.0495	5.33717e-11	12.0976	13.1038	1.34897e-07
mhc1uba	-2.85479	9.46028	33.184	8.38368e-09	7.89693	10.4905	1.81626e-05
tnnc1b	-3.39726	7.68354	28.42	9.76536e-08	6.17795	8.57489	0.000185115
hapln1a	6.18662	6.84968	21.8416	2.96105e-06	7.8294	5.33493	0.00498937
nppa	-1.14965	10.863	18.5747	1.63372e-05	10.3955	11.4793	0.0247753
eno3	-0.447664	12.148	17.461	2.93267e-05	11.7811	12.1878	0.0404308
si:dkey-4p15.3	5.61004	6.32687	16.4726	4.93574e-05	7.37094	5.33493	0.0601407
ppdpfa	1.68966	9.90661	16.3901	5.15549e-05	10.7544	9.09633	0.0601407
ckma	-0.377694	12.634	15.3068	9.13868e-05	12.2956	12.6311	0.0957791
tpm2	2.42407	7.51776	15.2388	9.4737e-05	8.37039	6.50661	0.0957791
rangap1a	-5.48979	6.68405	14.7217	0.000124604	5.37003	7.24137	0.118101
uba1	-2.51719	7.55737	14.3496	0.000151812	6.37086	8.14509	0.135426
tnni4b.3	5.48666	6.81997	14.1161	0.000171865	7.27826	5.33493	0.144797
rbp2a	5.35286	6.45656	13.7652	0.000207138	7.17822	5.33493	0.162047
ba1l	-0.600567	11.796	13.7065	0.000213712	10.8215	11.3643	0.162047
hbba2	-2.50865	9.00729	13.6017	0.00022598	6.53961	8.41007	0.16319
parvb	-1.64712	8.0828	13.3234	0.000262111	7.37029	8.73093	0.180678
higd1a	2.06724	7.64954	12.4267	0.00042323	8.27747	6.6566	0.278259
rrad	-1.57961	8.54786	12.3526	0.000440371	7.76415	9.12165	0.278259
ak1	0.457628	11.8767	12.0261	0.000524621	11.9863	11.5004	0.318235
htra1b	2.84737	6.64876	11.6671	0.000636162	7.69313	5.92215	0.371054
tcap	1.56562	8.32963	11.5114	0.00069169	8.79743	7.41835	0.388499
ndufb11	-2.08782	7.76937	11.1751	0.000829016	6.54004	8.03923	0.449001
smad6a	-5.04405	6.2342	10.9435	0.000939327	5.37003	6.92255	0.489186
tom1l2	3.40084	6.81835	10.8883	0.000967727	7.45879	5.65793	0.489186
anxa5b	-5.04163	6.18402	10.7781	0.0010271	5.37003	6.91846	0.502452
selenop	1.45452	9.53105	10.7	0.00107138	10.4051	8.9808	0.507732
ctrb1	1.95849	7.39549	10.495	0.001197	8.36911	6.79768	0.550075
zgc:101723	-5.04631	6.08215	10.1206	0.00146617	5.37003	6.92255	0.64792
tdh	1.51665	8.09533	10.0171	0.00155094	8.53977	7.24002	0.64792
slc43a1a	3.29019	6.78706	10.0002	0.00156522	7.37062	5.65641	0.64792
ghrb	2.32011	7.28217	9.93791	0.0016191	8.01498	6.33429	0.64792
mmrn2a	2.16414	7.3318	9.93286	0.00162354	8.12163	6.4914	0.64792
zgc:152816	-4.85743	6.3265	9.68199	0.00186083	5.37003	6.79768	0.673153
adcy5	-4.85724	6.32688	9.68124	0.00186159	5.37003	6.79633	0.673153
zgc:110699	3.16625	6.32549	9.63159	0.00191259	7.27884	5.65793	0.673153
gapdhs	1.66653	7.84951	9.60951	0.00193572	8.27838	6.91846	0.673153
kdr	2.75742	6.85028	9.59801	0.00194788	7.61877	5.92041	0.673153
rpl36a	-1.19522	10.1105	9.5931	0.0019531	9.54221	10.6521	0.673153
atp1a1a.4	-5.18694	5.96837	9.41215	0.00215552	5.37003	7.03068	0.726411
mrpl34	1.79761	7.53722	9.35556	0.00222309	8.22801	6.79485	0.732896
si:dkey-188i13.9	-2.41725	6.81944	9.23074	0.00237985	6.17795	7.73294	0.767882
cahz	-1.60363	8.49616	9.04647	0.00263202	7.17822	8.45629	0.831555
myh6	-1.39116	9.26153	9.00126	0.00269793	8.62014	9.88657	0.834983
hspa8	0.639791	11.1893	8.89703	0.00285635	11.661	10.9926	0.866332
tuba1a	-4.72966	6.29814	8.82299	0.0029746	5.37003	6.71505	0.877933
mdh2	0.308319	12.1592	8.80116	0.00301039	12.2351	11.8938	0.877933
ftr82	3.1655	6.85084	8.71446	0.00315697	7.27768	5.65793	0.903309
ctsla	-1.13216	8.0555	8.54321	0.00346813	7.9557	8.9235	0.97024
gnl3l	-3.03873	6.37202	8.51679	0.00351884	5.6924	7.14633	0.97024
clu	2.0834	6.99752	8.3182	0.00392497	8.07143	6.50364	1
eif4e2	-4.64328	6.32711	8.30532	0.00395291	5.37003	6.65949	1
flot2a	-4.64259	6.53662	8.28495	0.00399751	5.37003	6.6566	1
zgc:86709	1.01972	8.12952	8.26621	0.00403897	9.2056	8.2316	1
vegfab	2.17509	7.21027	8.17646	0.00424376	7.89465	6.33591	1
oaz1a	1.17418	8.19688	8.12271	0.00437143	8.86301	7.79148	1
rpl10a	-0.680338	11.0475	7.96081	0.00478009	10.6757	11.3029	1
rpl38	-1.26089	9.57591	7.88971	0.00497169	8.95691	10.1084	1
ndufb4	1.37483	7.76903	7.87659	0.00500788	8.41531	7.24262	1
hmgcrb	-4.64599	6.08161	7.76103	0.00533854	5.37003	6.65949	1
ddx23	2.44115	6.53609	7.7584	0.00534632	7.37175	5.92041	1
zgc:152791	-1.16226	8.85167	7.74298	0.00539218	8.83085	9.88231	1
neurl1b	4.63984	6.08135	7.7224	0.005454	6.69228	5.33493	1
laptm4b	4.63907	6.08124	7.71885	0.00546473	6.69254	5.33493	1
xpo4	-4.63474	6.07969	7.70665	0.00550177	5.37003	6.6537	1
zgc:123068	-1.00264	8.33884	7.59489	0.00585338	8.41658	9.29669	1
rsad2	-1.87863	6.75336	7.50843	0.00614109	6.54004	7.86073	1
nt5c2l1	1.69387	7.66912	7.47695	0.00624937	7.95543	6.6537	1
calm3b	2.55253	6.97146	7.45872	0.006313	7.45934	5.92041	1
itga5	1.67903	7.43583	7.40322	0.00651074	8.12599	6.79351	1
stxbp6	-4.63911	6.02619	7.35407	0.00669112	5.37003	6.6566	1
rps23	-0.866083	10.5377	7.34113	0.00673943	10.087	10.8865	1
rbx1	2.88382	6.53657	7.25204	0.00708203	7.07149	5.65793	1
hbaa2	-2.88892	7.65325	7.20762	0.00725947	5.69182	7.03068	1
spock3	0.989117	10.1924	7.16753	0.00742348	10.7645	9.76503	1
mrpl38	2.4415	6.78528	7.12776	0.00758996	7.37062	5.92041	1
atg9a	2.88359	6.18475	7.02115	0.00805526	7.07077	5.65793	1
amd1	-1.24264	8.1849	7.00256	0.00813934	7.45824	8.46842	1
dnajc12	-4.39146	6.32748	6.92516	0.00849916	5.37003	6.50661	1
vbp1	-4.39146	6.32682	6.92502	0.00849982	5.37003	6.50661	1
faf1	-4.39153	6.2807	6.91018	0.00857063	5.37003	6.50661	1
zgc:158234	4.38748	6.37153	6.9045	0.00859789	6.54031	5.33493	1
hsd17b4	-4.39243	6.23465	6.88391	0.00869753	5.37003	6.50817	1
ba2	-2.57175	7.08145	6.85439	0.0088424	5.89309	7.29875	1
mcts1	4.38766	6.23319	6.85349	0.00884681	6.54074	5.33493	1
rasgef1bb	4.38768	6.23329	6.85324	0.00884808	6.54004	5.33493	1
uba3	4.63909	5.97019	6.84734	0.00887734	6.69254	5.33493	1
eef1db	-1.18243	8.67649	6.83422	0.00894275	8.07143	9.09409	1
atp5pf	-1.19398	8.47717	6.82678	0.0089801	7.76365	8.76696	1
nap1l4b	2.31865	6.53528	6.72577	0.00950299	7.27884	5.91892	1
grinab	-4.39419	6.13471	6.72379	0.0095135	5.37003	6.50817	1
pla2g4aa	-4.3923	6.13418	6.71571	0.00955673	5.37003	6.50661	1
zgc:110339	-4.39066	6.1333	6.70787	0.00959885	5.37003	6.5052	1
smarca1	-4.38705	6.13194	6.69178	0.00968586	5.37003	6.50224	1
magi1b	4.3877	6.13469	6.68951	0.00969819	6.54031	5.33493	1
cand2	4.3875	6.1339	6.68712	0.00971122	6.54074	5.33493	1
rpap3	4.3875	6.1332	6.68523	0.00972152	6.54074	5.33493	1
gys1	1.38698	7.68292	6.55716	0.0104463	8.17951	7.03468	1
ifrd2	-4.39295	6.08121	6.53655	0.010568	5.37003	6.50661	1
rnf8	-4.38713	6.08026	6.51358	0.0107053	5.37003	6.50364	1
antxr2a	-4.38712	6.08012	6.51296	0.0107091	5.37003	6.50364	1
nudt9	4.38787	6.08198	6.5117	0.0107167	6.54031	5.33493	1
pdgfra	4.38735	6.08098	6.50624	0.0107497	6.54074	5.33493	1
edc4	-4.38436	6.0804	6.5053	0.0107553	5.37003	6.50224	1
nceh1a	4.38735	6.0804	6.50381	0.0107643	6.54074	5.33493	1
znf292b	2.31816	6.68483	6.47026	0.0109694	7.27826	5.92041	1
timm17a	1.29717	7.86756	6.34697	0.0117582	8.22776	7.14241	1
fbxo25	-4.3984	6.02746	6.28596	0.0121698	5.37003	6.50817	1
rps29	-1.1814	9.30934	6.25915	0.0123554	8.5812	9.63882	1
mrto4	-4.38955	6.02738	6.25836	0.0123608	5.37003	6.5052	1
rab18a	4.64127	5.91106	6.24673	0.0124423	6.69228	5.33493	1
dctn2	-2.32603	6.78677	6.2465	0.0124439	5.95495	7.24387	1
boc	4.39033	6.0268	6.2461	0.0124467	6.53961	5.33493	1
pgp	4.38714	6.0274	6.24046	0.0124864	6.54074	5.33493	1
btbd6b	4.63718	5.91116	6.23643	0.0125148	6.69295	5.33493	1
ube3c	4.38589	6.02687	6.23362	0.0125347	6.54101	5.33493	1
ptpn11b	4.38713	6.02613	6.23315	0.0125381	6.54074	5.33493	1
skia	2.31971	6.78606	6.21124	0.0126942	7.27792	5.91892	1
atp6v0cb	-2.72474	6.45544	6.17703	0.012942	5.6924	6.91846	1
txndc5	2.71897	6.45527	6.14509	0.0131777	6.9561	5.65641	1
g0s2	2.71916	6.32614	6.13727	0.0132362	6.95711	5.65641	1
ncoa5	2.71879	6.32613	6.13487	0.0132541	6.9561	5.65793	1
fryl	-1.93098	6.90999	6.12374	0.0133378	6.36984	7.6538	1
si:dkey-23c22.6	2.7187	6.28105	6.10606	0.0134719	6.9561	5.65793	1
rnf145b	2.71864	6.57439	6.08476	0.0136353	6.9561	5.65793	1
atp1a3b	0.751686	10.5549	6.01048	0.0142211	11.2167	10.4413	1
slco2b1	1.9333	7.02597	5.93136	0.0148738	7.69313	6.33429	1
brd8	-4.39491	5.9705	5.90178	0.0151256	5.37003	6.50661	1
zgc:92140	-4.38876	5.97004	5.88131	0.0153024	5.37003	6.5052	1
smox	-4.38876	5.97004	5.88131	0.0153024	5.37003	6.5052	1
zgc:122979	4.38688	5.97068	5.87095	0.0153928	6.54074	5.33493	1
dis3l	4.38688	5.97038	5.86877	0.0154119	6.54074	5.33493	1
serpinb1l1	4.38688	5.96973	5.86407	0.015453	6.54074	5.33493	1
asph	-4.38232	5.96978	5.86122	0.0154781	5.37003	6.50364	1
zfr	-2.32078	6.94137	5.8518	0.0155611	5.95524	7.24002	1
actb2	0.225714	12.2469	5.8458	0.0156143	12.4316	12.1696	1
prkcbp1l	2.02317	6.82003	5.83473	0.0157128	7.458	6.1439	1
mars	-2.72627	6.13429	5.77432	0.016262	5.69182	6.92123	1
eif3s6ip	-1.36884	7.72028	5.76673	0.0163324	6.95648	7.98103	1
hspb6	1.07518	9.01368	5.75248	0.0164654	9.69281	8.65441	1
snrnp200	-2.191	6.53604	5.75188	0.016471	5.95495	7.14241	1
pja2	2.71964	6.13341	5.73835	0.0165984	6.95572	5.65641	1
oaz2b	2.7176	6.13387	5.73175	0.0166608	6.9561	5.65793	1
slc25a55b	-2.19125	6.57479	5.71748	0.0167968	5.95495	7.14368	1
s100v2	2.1844	6.53594	5.71444	0.016826	7.17916	5.91892	1
tefb	-2.1896	6.57398	5.71047	0.016864	5.95577	7.13976	1
zgc:63831	4.08281	6.32679	5.52342	0.0187635	6.37086	5.33493	1
camk2b1	-1.43305	7.41427	5.52327	0.0187651	6.95535	8.03501	1
med30	-4.08661	6.23313	5.51462	0.0188582	5.37003	6.33591	1
appa	1.14883	8.13572	5.49642	0.0190555	8.32555	7.33892	1
daam1b	4.08287	6.23396	5.49456	0.0190758	6.37058	5.33493	1
gnb5b	-2.73097	6.08197	5.47973	0.0192383	5.6924	6.92387	1
galnt7	-4.08664	6.18383	5.47583	0.0192812	5.37003	6.33591	1
cnbpa	-2.03188	7.02885	5.47288	0.0193138	6.17717	7.42455	1
adipor2	2.18421	6.71926	5.44416	0.0196339	7.17787	5.92041	1
antxr2b	-2.72324	6.0809	5.43923	0.0196893	5.6924	6.91978	1
nup205	-4.38793	5.91095	5.41747	0.0199362	5.37003	6.5052	1
egfra	4.39104	5.91092	5.41617	0.0199511	6.54004	5.33493	1
akt2l	-4.08836	6.13351	5.41061	0.0200147	5.37003	6.33734	1
bcl7ba	4.38661	5.91141	5.40931	0.0200296	6.54074	5.33493	1
srsf9	4.38661	5.91128	5.4083	0.0200412	6.54074	5.33493	1
nolc1	-4.08668	6.1343	5.40751	0.0200503	5.37003	6.33591	1
nfkbib	4.3866	5.91102	5.40611	0.0200663	6.54074	5.33493	1
gmps	-4.08468	6.13386	5.40097	0.0201256	5.37003	6.33429	1
acox1	4.08287	6.13463	5.38796	0.0202761	6.37058	5.33493	1
ech1	4.08287	6.13414	5.3871	0.0202861	6.37058	5.33493	1
hnrnpaba	-0.992356	8.0933	5.38662	0.0202917	7.76365	8.58118	1
csnk2a2a	4.08238	6.13321	5.38417	0.0203203	6.37086	5.33493	1
mvp	-2.19287	6.78757	5.3409	0.0208307	5.95524	7.14495	1
rrm1	-4.08676	6.08112	5.28831	0.0214691	5.37003	6.33591	1
hnrnpc	-4.08358	6.08127	5.28002	0.0215715	5.37003	6.33429	1
stk24b	-4.08354	6.07991	5.27619	0.021619	5.37003	6.33429	1
myoz2a	4.08336	6.08178	5.27132	0.0216796	6.37012	5.33493	1
smyd1b	-1.55016	7.36965	5.19151	0.0226975	6.69254	7.79605	1
fbxo34	-1.62929	7.05626	5.17845	0.0228688	6.69228	7.86183	1
si:ch211-105c13.3	1.0901	7.70082	5.15626	0.0231627	8.37017	7.41955	1
rock2a	-0.953694	8.12247	5.13506	0.0234472	7.82962	8.62269	1
dhrs7	-4.09136	6.02737	5.12128	0.0236342	5.37003	6.33734	1
fam204a	-4.09138	6.02693	5.11959	0.0236573	5.37003	6.33734	1
lgals3bpb	-1.54174	6.53563	5.11278	0.0237502	6.54004	7.58261	1
prpsap2	-4.08686	6.02763	5.11102	0.0237743	5.37003	6.33591	1
lmnb1	-4.082	6.02654	5.09432	0.0240043	5.37003	6.33429	1
ppp3ccb	4.08385	6.02714	5.09225	0.024033	6.37012	5.33493	1
skib	4.08385	6.02714	5.09223	0.0240332	6.37012	5.33493	1
mical2b	-1.91838	6.81904	5.09122	0.0240473	6.17795	7.33637	1
sec63	4.08157	6.0264	5.08403	0.0241472	6.37086	5.33493	1
uqcrh	1.05635	8.62254	5.06486	0.0244157	8.83015	7.86407	1
dpysl3	-2.18563	6.91026	5.05679	0.0245296	5.95524	7.13976	1
mrpl30	-2.5397	6.41454	5.05671	0.0245307	5.69182	6.79485	1
foxk1	-2.53907	6.3717	5.05492	0.0245561	5.6924	6.79768	1
agrn	-2.53897	6.49632	5.04326	0.0247219	5.6924	6.79633	1
sh3bgrl3	-2.53829	6.53551	5.02595	0.0249702	5.6924	6.79351	1
slka	-2.53855	6.28124	5.02235	0.0250221	5.6924	6.79485	1
psmc2	2.53238	6.45553	5.02066	0.0250466	6.83026	5.65641	1
cavin2a	2.53202	6.32736	5.01216	0.0251699	6.82895	5.65793	1
rps12	-0.687925	10.6218	4.99341	0.025444	10.1926	10.8206	1
etv4	2.5324	6.28081	4.99256	0.0254565	6.8296	5.65641	1
nedd9	-2.5397	6.23432	4.98424	0.0255793	5.6924	6.79768	1
supt6h	2.53209	6.57526	4.97545	0.0257095	6.8296	5.65793	1
cyth1b	2.53251	6.23376	4.95007	0.0260896	6.83026	5.65641	1
fmnl3	2.53213	6.23365	4.94841	0.0261147	6.83	5.65793	1
rps24	-0.720471	10.4954	4.89494	0.0269354	10.1136	10.7727	1
ccdc85ca	-4.38715	5.84947	4.89167	0.0269865	5.37003	6.5052	1
camlg	4.38635	5.84967	4.88429	0.0271021	6.54074	5.33493	1
rtn1b	4.38635	5.84953	4.88305	0.0271216	6.54074	5.33493	1
fah	4.38345	5.84941	4.87585	0.027235	6.54101	5.33493	1
krt5	4.38111	5.84982	4.87457	0.0272553	6.5416	5.33493	1
usp12a	-4.37686	5.84913	4.86662	0.027381	5.37003	6.50364	1
si:ch73-109d9.2	4.0829	5.97087	4.84001	0.0278067	6.37058	5.33493	1
poll	-4.08004	5.9697	4.83556	0.0278787	5.37003	6.33429	1
gstk4	4.08098	5.97018	4.83215	0.0279338	6.37086	5.33493	1
serinc1	-1.18471	7.63171	4.82568	0.0280388	7.17822	8.09001	1
tfr1a	-2.53834	6.75375	4.82542	0.028043	5.6924	6.79485	1
plod2	-4.0734	5.96937	4.81851	0.0281556	5.37003	6.33286	1
gna12a	-2.04357	6.49774	4.7892	0.0286388	5.95524	7.03868	1
plekha7a	-1.18578	7.61177	4.78905	0.0286412	7.17822	8.09211	1
mgst3a	-1.9186	6.97106	4.78816	0.028656	6.17795	7.33637	1
ldhba	-0.400657	11.4146	4.78785	0.0286612	11.3423	11.7009	1
2023-03-06	2.03596	6.41397	4.76818	0.0289905	7.07102	5.91892	1
anp32b	-1.91755	7.13518	4.76773	0.0289981	6.17717	7.33637	1
sytl4	2.0361	6.37117	4.76717	0.0290074	7.07149	5.92041	1
slc37a2	-2.54003	6.13397	4.75254	0.0292552	5.6924	6.79633	1
naa50	-1.6432	6.64791	4.75159	0.0292712	6.37058	7.42205	1
rhoab	1.7871	6.53609	4.74584	0.0293692	7.27768	6.14536	1
tapbp.1	-2.53731	6.13345	4.73801	0.0295031	5.69182	6.79351	1
irf9	2.03617	6.28089	4.726	0.0297099	7.06979	5.91892	1
tsku	2.53342	6.13354	4.7215	0.0297877	6.83	5.65641	1
f2r	2.53068	6.13357	4.71148	0.0299618	6.83104	5.65793	1
srsf6a	-1.79542	6.61274	4.7104	0.0299806	6.17795	7.24387	1
bag6	1.78719	6.57561	4.70988	0.0299897	7.27724	6.1439	1
rplp2l	-1.01818	9.26387	4.70955	0.0299955	8.65711	9.56377	1
ddt	-1.75628	7.00049	4.70249	0.030119	6.37086	7.51006	1
apmap	2.03504	6.57453	4.70177	0.0301316	7.07149	5.92215	1
acta2	0.989453	9.11441	4.69789	0.0301997	9.6554	8.69661	1
mdh1aa	0.392432	11.4802	4.68144	0.0304902	11.555	11.1325	1
tomm20a	1.78713	6.61268	4.66541	0.030776	7.27826	6.1439	1
si:dkey-206d17.5	-1.79472	6.6491	4.65199	0.0310175	6.17766	7.24262	1
zgc:172270	1.74802	7.05437	4.63368	0.0313503	7.54031	6.33286	1
atp5l	-1.02639	9.38325	4.62577	0.031495	8.58022	9.49089	1
mdh1ab	0.917872	8.4179	4.61454	0.0317019	8.8305	7.97997	1
rbbp6	1.63057	6.99869	4.61424	0.0317075	7.69262	6.50364	1
mrpl47	1.78715	6.64863	4.61154	0.0317574	7.27724	6.1439	1
fhl2a	-1.63446	7.0556	4.61094	0.0317686	6.54074	7.65845	1
rpl11	-0.562178	10.9026	4.60999	0.0317863	10.6109	11.1197	1
dohh	-1.64402	6.71829	4.59564	0.0320534	6.37086	7.42325	1
mob1ba	-2.04353	6.18488	4.5945	0.0320747	5.95495	7.03738	1
stau1	0.939834	7.88038	4.58311	0.0322885	8.49979	7.65731	1
plxnd1	1.62258	7.10854	4.56003	0.0327266	7.69262	6.50817	1
utp6	-4.09602	5.9124	4.55604	0.0328029	5.37003	6.33734	1
homer2	-4.09604	5.91183	4.55269	0.032867	5.37003	6.33734	1
asb2b	-4.09605	5.91171	4.55197	0.0328808	5.37003	6.33734	1
nr1d2a	1.63449	6.71942	4.53835	0.0331436	7.458	6.33895	1
per1a	-4.08714	5.9115	4.53177	0.0332712	5.37003	6.33591	1
deptor	-4.08714	5.91132	4.53067	0.0332926	5.37003	6.33591	1
rps26l	-0.981349	8.97818	4.53013	0.0333031	8.50124	9.36239	1
tnni3k	2.03595	6.71926	4.52513	0.0334005	7.07149	5.92041	1
ndufa9a	-0.911852	8.19797	4.52278	0.0334465	7.83067	8.5839	1
map4k2	4.08515	5.91177	4.52138	0.0334738	6.37012	5.33493	1
atp2b1a	4.08515	5.91164	4.52066	0.0334879	6.37012	5.33493	1
actr3	-1.20196	7.61179	4.516	0.0335793	7.07102	7.97674	1
zgc:112271	4.08516	5.91066	4.5149	0.0336009	6.37012	5.33493	1
fam129bb	4.08291	5.91133	4.51424	0.0336139	6.37058	5.33493	1
fam172a	4.08291	5.91126	4.51386	0.0336212	6.37058	5.33493	1
hey2	4.08291	5.91126	4.51386	0.0336212	6.37058	5.33493	1
sh3gl3b	4.08291	5.91114	4.51314	0.0336354	6.37058	5.33493	1
flt4	4.08291	5.91061	4.51002	0.0336969	6.37058	5.33493	1
klhdc2	-4.07787	5.91099	4.50885	0.0337198	5.37003	6.33429	1
mtap	4.08032	5.91121	4.50808	0.033735	6.37086	5.33493	1
mhc2b	4.08031	5.91064	4.50469	0.033802	6.37086	5.33493	1
rnd1a	4.07808	5.91124	4.50369	0.0338217	6.37131	5.33493	1
fbxo3	-4.06892	5.91047	4.48693	0.0341549	5.37003	6.33286	1
fam32a	1.7863	6.71988	4.4759	0.0343761	7.277	6.14536	1
gab1	2.03648	6.75318	4.47069	0.0344811	7.07041	5.92041	1
rpl3	0.213573	12.1329	4.45995	0.0346986	12.3072	12.0577	1
mccc2	1.37512	7.64877	4.43562	0.0351963	7.69313	6.6566	1
foxp1a	2.72424	5.96975	4.42289	0.0354599	6.95535	5.65641	1
metap2b	1.04063	8.04226	4.42284	0.035461	8.22844	7.3326	1
btg1	0.983977	7.75343	4.42061	0.0355073	8.37017	7.50516	1
rps25	-0.696743	10.432	4.41597	0.0356041	10.1799	10.8152	1
mxra8b	1.78738	6.75279	4.41277	0.0356708	7.277	6.1439	1
mycb	2.0338	6.78712	4.40147	0.0359081	7.07102	5.92215	1
ddx54	-1.79437	6.78649	4.37549	0.0364593	6.17717	7.24262	1
rpl35a	-0.749159	10.3213	4.37037	0.036569	9.78175	10.4638	1
shoc2	4.39564	5.78579	4.35351	0.0369327	6.53961	5.33493	1
selenom	4.39256	5.78574	4.34765	0.03706	6.54004	5.33493	1
fkbp9	-4.38647	5.78564	4.34217	0.0371795	5.37003	6.5052	1
tbx2b	4.38612	5.78518	4.33138	0.0374159	6.54074	5.33493	1
naca	-0.471724	11.133	4.28636	0.0384194	10.8727	11.2939	1
rpl37	-0.83812	9.94957	4.27054	0.0387785	9.54221	10.3045	1
stau2	0.625502	10.6267	4.24184	0.0394395	10.9329	10.285	1
gstm.3	-0.941198	7.75087	4.23908	0.0395036	7.61877	8.37399	1
hsd17b10	1.46711	7.23382	4.23855	0.0395159	7.76207	6.65508	1
lamb1b	1.64011	6.84947	4.23669	0.0395593	7.45737	6.33429	1
si:ch211-5k11.8	-0.246234	12.0382	4.2303	0.0397085	11.6675	11.8526	1
fli1a	1.40303	7.21017	4.21896	0.0399746	7.89368	6.79768	1
eif3g	-0.965168	8.88905	4.21494	0.0400695	8.27723	9.11578	1
eif3ha	-1.53807	7.25734	4.20019	0.0404194	6.54031	7.58145	1
tma7	-1.34107	7.39463	4.20006	0.0404225	6.83026	7.80055	1
mthfr	-4.09848	5.85036	4.1736	0.0410584	5.37003	6.33734	1
jph2	0.981814	7.83557	4.17299	0.0410732	8.27747	7.42705	1
idh1	-3.69976	6.41498	4.16443	0.0412813	5.37003	6.1439	1
smcr8a	-4.08729	5.85017	4.15129	0.0416028	5.37003	6.33591	1
rps2	-0.205071	12.1439	4.15037	0.0416254	12.0991	12.2623	1
cish	-4.08729	5.84971	4.14837	0.0416746	5.37003	6.33591	1
ints2	-4.08729	5.84957	4.14745	0.0416972	5.37003	6.33591	1
sctr	-4.08729	5.84957	4.14745	0.0416972	5.37003	6.33591	1
alas1	1.00196	9.31163	4.14269	0.0418147	9.27621	8.33092	1
them4	4.08583	5.85022	4.14214	0.0418281	6.37012	5.33493	1
kif7	4.08583	5.84983	4.13964	0.04189	6.37012	5.33493	1
r3hdm4	4.08583	5.84977	4.13928	0.041899	6.37012	5.33493	1
socs3a	3.6955	6.27997	4.13884	0.0419099	6.17717	5.33493	1
pdlim4	4.08292	5.84998	4.13534	0.0419965	6.37058	5.33493	1
edf1	-1.22741	7.53722	4.13222	0.0420741	6.95535	7.86183	1
waca	3.69574	6.23373	4.12887	0.0421576	6.17795	5.33493	1
si:ch211-51e12.7	1.46191	7.18566	4.12719	0.0421993	7.76264	6.65797	1
ripor3	-4.07571	5.84938	4.1244	0.042269	5.37003	6.33429	1
si:ch211-14a17.11	-4.0757	5.84912	4.1227	0.0423114	5.37003	6.33429	1
zgc:77056	-4.0757	5.84899	4.12189	0.0423317	5.37003	6.33429	1
manf	4.07675	5.84955	4.1212	0.0423491	6.37131	5.33493	1
ebna1bp2	-3.69881	6.18401	4.12072	0.042361	5.37003	6.14223	1
tsc22d1	3.69569	6.18533	4.10752	0.042693	6.17795	5.33493	1
gpx3	-4.06442	5.8486	4.09842	0.0429234	5.37003	6.33286	1
abhd4	-3.70061	6.1344	4.08575	0.0432463	5.37003	6.1439	1
zgc:194398	-3.69847	6.13332	4.07988	0.0433968	5.37003	6.14223	1
akirin1	-3.69847	6.13332	4.07988	0.0433968	5.37003	6.14223	1
osbp	-3.69847	6.13326	4.07982	0.0433983	5.37003	6.14223	1
mrpl27	3.69607	6.13399	4.06826	0.0436963	6.17766	5.33493	1
fip1l1b	3.69607	6.13376	4.06802	0.0437024	6.17766	5.33493	1
rab40b	3.69612	6.13406	4.06799	0.0437031	6.17717	5.33493	1
dnajb1b	3.69558	6.13412	4.06739	0.0437188	6.17795	5.33493	1
raraa	-3.7042	6.08214	4.02545	0.0448187	5.37003	6.14536	1
mrpl40	-3.7042	6.08202	4.02526	0.0448236	5.37003	6.14536	1
si:dkey-51e6.1	-1.64835	7.08193	4.02344	0.044872	6.37086	7.42575	1
acbd5a	-3.70128	6.08242	4.02007	0.0449618	5.37003	6.1439	1
csnk1g2a	-3.70129	6.08166	4.01888	0.0449936	5.37003	6.1439	1
rpz	-3.69792	6.08169	4.0118	0.045183	5.37003	6.14223	1
rnd3a	-3.69791	6.08157	4.01161	0.045188	5.37003	6.14223	1
mov10b.1	-1.44224	6.7187	4.00962	0.0452414	6.54004	7.50397	1
prkag1	3.69625	6.08158	4.00109	0.0454709	6.17766	5.33493	1
ubtfl	3.69625	6.0812	4.00048	0.0454872	6.17766	5.33493	1
ccdc9	3.69626	6.0811	4.00032	0.0454916	6.17766	5.33493	1
lgals3b	1.78527	7.10794	3.99276	0.0456961	7.27826	6.1439	1
myom2a	-0.862172	8.75559	3.98794	0.045827	8.54119	9.29465	1
zfp36l1b	0.834838	8.24734	3.9825	0.0459752	8.69164	7.92602	1
rab11ba	-2.32568	6.32715	3.95489	0.0467354	5.69182	6.65797	1
get4	1.52343	6.64868	3.9411	0.0471199	7.37094	6.33591	1
si:ch211-197g15.10	-2.32433	6.53639	3.9399	0.0471534	5.6924	6.6566	1
stat1b	-1.3333	6.84887	3.93982	0.0471559	6.83026	7.79376	1
tspan3a	-0.989742	8.01476	3.93875	0.0471859	7.37062	8.14716	1
sid4	2.31827	6.3708	3.93342	0.0473355	6.69228	5.65641	1
prpf40a	2.31808	6.37051	3.93248	0.0473621	6.69187	5.65641	1
ckap5	-2.32567	6.5746	3.929	0.0474602	5.69182	6.65797	1
nbeaa	2.31812	6.32692	3.92679	0.0475227	6.69228	5.65793	1
dhrs7cb	1.12693	7.6303	3.91714	0.0477962	7.95543	7.03609	1
arih1	2.31874	6.28	3.91453	0.0478705	6.69377	5.65641	1
lats2	2.31839	6.28137	3.91313	0.0479102	6.69228	5.65641	1
ctps1a	-3.7023	6.02632	3.91247	0.0479291	5.37003	6.1439	1
rab3gap2	-2.32515	6.23311	3.90715	0.0480812	5.69182	6.6566	1
grn1	-3.69708	6.02614	3.90163	0.0482394	5.37003	6.14223	1
tram1	3.69652	6.02732	3.89637	0.0483906	6.17766	5.33493	1
strip1	3.69467	6.02753	3.89401	0.0484585	6.17864	5.33493	1
ccdc28b	3.69515	6.02678	3.89249	0.0485026	6.17795	5.33493	1
epn1	-1.38565	7.32867	3.88381	0.0487539	6.69254	7.66082	1
noc2l	2.3185	6.23265	3.88242	0.0487943	6.69295	5.65641	1
mrps18b	2.31842	6.23275	3.88196	0.0488074	6.69254	5.65641	1
gorasp2	2.31796	6.23412	3.88132	0.0488261	6.69187	5.65793	1
zfpm2a	2.31789	6.23334	3.88069	0.0488444	6.69254	5.65793	1
fam13b	0.828093	8.17235	3.85616	0.0495638	8.61862	7.85849	1
usp5	-1.87764	6.41423	3.84693	0.0498372	5.95577	6.92123	1
aven	-2.32384	6.18415	3.84541	0.0498823	5.6924	6.6566	1
fermt2	-1.87771	6.45555	3.84241	0.0499715	5.95495	6.91846	1
rfk	1.43978	6.78572	3.82622	0.0504566	7.54031	6.50364	1
prickle2b	-1.66158	6.64844	3.82538	0.0504819	6.17795	7.14495	1
swap70b	2.31863	6.18374	3.82401	0.0505233	6.69254	5.65641	1
ap2m1b	2.3186	6.1836	3.82391	0.0505262	6.69295	5.65641	1
pam16	1.87129	6.41346	3.81839	0.050693	6.95648	5.91892	1
nccrp1	-1.87754	6.53624	3.81835	0.0506942	5.95524	6.91846	1
ppp1r37	1.87088	6.37074	3.81469	0.0508051	6.95572	5.92041	1
ube2g1b	1.87008	6.45617	3.80996	0.0509488	6.95572	5.92215	1
arg2	1.04777	7.82088	3.80633	0.0510592	8.01446	7.14495	1
herpud2	1.87081	6.32702	3.80551	0.0510844	6.95509	5.92041	1
si:ch73-281f12.4	1.87108	6.49604	3.80458	0.0511126	6.95572	5.91892	1
slc16a3	1.14133	7.85135	3.80101	0.0512216	7.83067	6.92255	1
lima1a	4.38941	5.71829	3.7954	0.0513936	6.54031	5.33493	1
ola1	-0.88886	8.62816	3.78921	0.0515841	8.07214	8.82259	1
slc2a1a	-4.11424	5.78609	3.78025	0.051861	5.37003	6.33895	1
hspa4a	1.12635	7.55633	3.77878	0.0519065	7.95665	7.03609	1
b3glcta	-3.71069	5.97078	3.77775	0.0519384	5.37003	6.14536	1
fkbp5	2.31784	6.75524	3.77349	0.0520708	6.69228	5.65793	1
pgrmc1	1.87101	6.57486	3.77022	0.0521727	6.95648	5.92041	1
pepd	-1.87746	6.2334	3.7698	0.052186	5.95495	6.91978	1
vsir	-1.8771	6.23253	3.76725	0.0522656	5.95524	6.91846	1
calr	-4.10069	5.78562	3.75503	0.0526489	5.37003	6.33734	1
2023-03-05	-3.69602	5.97033	3.74907	0.052837	5.37003	6.14223	1
wdr45	-3.69602	5.97033	3.74907	0.052837	5.37003	6.14223	1
pcsk7	-3.69602	5.97027	3.74888	0.0528428	5.37003	6.14223	1
ost4	-3.696	5.96968	3.74705	0.0529007	5.37003	6.14223	1
gnai2a	-1.8785	6.64883	3.74535	0.0529548	5.95577	6.92255	1
prkar1ab	-2.32494	6.13396	3.74524	0.0529581	5.6924	6.65797	1
bms1	3.69688	5.97036	3.74424	0.0529897	6.17766	5.33493	1
loxl2b	3.69688	5.97036	3.74424	0.0529899	6.17766	5.33493	1
b4galnt1a	3.69688	5.97009	3.74343	0.0530154	6.17766	5.33493	1
zgc:110319	1.87142	6.23278	3.74318	0.0530236	6.9561	5.91892	1
srebf1	3.69482	5.971	3.74241	0.0530478	6.17795	5.33493	1
lamp1b	3.69688	5.96944	3.74145	0.0530784	6.17766	5.33493	1
hhatlb	3.69481	5.97032	3.74035	0.0531132	6.17795	5.33493	1
kansl3	1.86978	6.61225	3.74027	0.0531158	6.95648	5.92215	1
wu:fa19b12	3.69481	5.96998	3.73931	0.0531465	6.17795	5.33493	1
fam160b2	3.69318	5.96993	3.73648	0.0532364	6.17843	5.33493	1
klhl12	-4.08742	5.78589	3.73527	0.053275	5.37003	6.33591	1
zfyve27	-4.08742	5.78589	3.73524	0.0532762	5.37003	6.33591	1
cyp1b1	4.09029	5.78599	3.73477	0.0532911	6.36984	5.33493	1
smarca4a	-3.68887	5.96974	3.7342	0.0533093	5.37003	6.14077	1
pinx1	4.08644	5.78587	3.72781	0.0535136	6.37012	5.33493	1
sh3gl1b	-2.32047	6.1325	3.72527	0.053595	5.69182	6.6537	1
actr2a	4.08293	5.78577	3.72158	0.0537134	6.37058	5.33493	1
aclya	2.31903	6.13342	3.72144	0.0537181	6.69254	5.65641	1
ahsa1a	4.08293	5.78557	3.72035	0.0537532	6.37058	5.33493	1
hspa9	0.803774	8.59368	3.71888	0.0538006	9.15362	8.38072	1
eif4e1c	2.31796	6.13383	3.71881	0.0538028	6.69187	5.65793	1
nova2	2.31773	6.13354	3.71751	0.0538447	6.69228	5.65793	1
ppp6c	-1.65994	6.71959	3.71612	0.0538895	6.17843	7.14241	1
zgc:113518	4.07907	5.78532	3.71251	0.0540061	6.37086	5.33493	1
insrb	-4.07377	5.78555	3.71097	0.0540561	5.37003	6.33429	1
hyou1	-4.07377	5.78543	3.7102	0.0540808	5.37003	6.33429	1
adgrl4	-4.07377	5.78543	3.71017	0.0540819	5.37003	6.33429	1
mtmr12	-4.07376	5.78516	3.70844	0.0541378	5.37003	6.33429	1
cycsb	0.691862	10.2847	3.70332	0.0543044	10.5512	9.8436	1
kcnh6a	-1.52745	6.78491	3.69867	0.0544557	6.37086	7.3326	1
ndufb8	0.83806	8.39221	3.69384	0.0546137	8.69319	7.91831	1
sept8a	-2.53097	5.96937	3.69137	0.0546947	5.69182	6.79351	1
ppp3r1a	-4.06041	5.78504	3.68631	0.0548608	5.37003	6.33286	1
lrrc39	0.9263	7.88172	3.66035	0.055722	8.22888	7.42455	1
rps8a	-0.423482	11.1526	3.63781	0.0564813	11.0081	11.3855	1
pdgfrl	1.12874	7.47687	3.61951	0.0571055	7.95644	7.03338	1
pdia3	-0.771123	8.3607	3.61208	0.0573612	8.17882	8.82919	1
ubr5	1.43419	6.88196	3.57334	0.0587141	7.54031	6.50817	1
pank1a	1.65172	6.78629	3.56839	0.0588895	7.17882	6.1439	1
pcxa	-3.70509	5.91187	3.56518	0.0590034	5.37003	6.1439	1
hif1an	-3.70509	5.91181	3.56495	0.0590117	5.37003	6.1439	1
lyve1a	-3.7051	5.91149	3.56374	0.0590546	5.37003	6.1439	1
zgc:174180	-3.7051	5.91136	3.56328	0.0590708	5.37003	6.1439	1
mtg1	-3.7051	5.9113	3.56305	0.0590792	5.37003	6.1439	1
rps27l	-2.31962	6.08028	3.55327	0.0594283	5.6924	6.65508	1
hspb11	0.770809	9.85047	3.55109	0.0595065	10.4284	9.64176	1
dpp7	2.31861	6.08049	3.54873	0.0595911	6.69336	5.65641	1
dnase2	3.69972	5.91138	3.54765	0.0596298	6.17717	5.33493	1
ptbp2a	-3.69477	5.91169	3.54659	0.059668	5.37003	6.14223	1
mustn1b	0.834506	8.7541	3.5465	0.0596713	9.17767	8.38072	1
spsb4a	3.69972	5.91105	3.54643	0.0596736	6.17717	5.33493	1
mkrn2	-3.69477	5.91156	3.54613	0.0596847	5.37003	6.14223	1
thoc1	2.31656	6.0815	3.54588	0.0596933	6.69254	5.65793	1
fnta	-3.69476	5.91142	3.54559	0.059704	5.37003	6.14223	1
pir	-3.69476	5.91124	3.54489	0.0597292	5.37003	6.14223	1
msl2b	-3.69475	5.91097	3.54388	0.0597653	5.37003	6.14223	1
smurf2	3.69729	5.91138	3.5438	0.0597686	6.17766	5.33493	1
twnk	3.69729	5.91112	3.54281	0.0598042	6.17766	5.33493	1
n6amt1	3.69729	5.91112	3.54281	0.0598042	6.17766	5.33493	1
si:ch211-57i17.1	3.69442	5.91172	3.54017	0.0598994	6.17795	5.33493	1
acap1	3.69442	5.91158	3.53963	0.059919	6.17795	5.33493	1
nipal3	3.69442	5.91154	3.53947	0.0599245	6.17795	5.33493	1
nt5c2b	3.69442	5.91139	3.53894	0.0599437	6.17795	5.33493	1
smpd5	3.69442	5.91107	3.53773	0.0599876	6.17795	5.33493	1
dock1	3.69199	5.91095	3.53342	0.0601436	6.17843	5.33493	1
snrpd2	3.69199	5.91089	3.5332	0.0601517	6.17843	5.33493	1
rbm34	-3.68483	5.91052	3.52535	0.060437	5.37003	6.14077	1
sdhdb	1.282	7.47515	3.50259	0.0612731	7.62005	6.65797	1
igfbp7	1.36855	7.00035	3.48238	0.0620254	7.69342	6.66087	1
got2a	0.673236	10.2787	3.47484	0.0623088	10.5103	9.82361	1
gadd45ba	1.52462	6.91121	3.44855	0.0633074	7.36996	6.33591	1
cyp2aa6	-1.4436	7.08108	3.44609	0.0634017	6.54101	7.50516	1
hspa5	-1.44085	7.05438	3.43036	0.0640082	6.54074	7.50397	1
eif4ebp2	0.849445	8.63167	3.42663	0.0641528	8.82996	8.03923	1
myg1	-1.53405	6.97105	3.42362	0.0642698	6.37086	7.33769	1
mink1	1.52651	6.94188	3.4172	0.0645204	7.37062	6.33429	1
rpl36	-0.670703	10.2442	3.41667	0.0645409	9.92605	10.536	1
retsat	-1.53774	7.02826	3.40876	0.0648513	6.37058	7.34024	1
ckmt2a	0.858895	8.72859	3.37383	0.0662396	8.89499	8.09001	1
reep5	1.6543	6.94105	3.35914	0.066833	7.17822	6.14244	1
micu2	1.52381	6.99806	3.35826	0.0668687	7.37062	6.33591	1
eef1a1l1	-0.412504	13.8398	3.35591	0.066964	13.721	14.0958	1
lrrc8c	-2.33001	6.02717	3.3416	0.0675488	5.6924	6.65949	1
ctr9	-3.71948	5.85021	3.33944	0.0676376	5.37003	6.14536	1
rem1	-0.929131	7.72019	3.33171	0.0679562	7.37094	8.09422	1
stt3b	-2.32568	6.02685	3.32728	0.0681395	5.6924	6.65797	1
coq5	-2.3253	6.02679	3.32473	0.0682452	5.69182	6.65797	1
irf2bp2a	-1.2536	7.25852	3.3247	0.0682463	6.83	7.72829	1
smarce1	1.65531	6.99939	3.32237	0.0683431	7.17787	6.14223	1
golga1	-3.70668	5.85048	3.32059	0.0684173	5.37003	6.1439	1
dap	-3.70668	5.85048	3.32059	0.0684173	5.37003	6.1439	1
tmcc3	-3.70668	5.85039	3.32024	0.0684319	5.37003	6.1439	1
timm8a	-3.70668	5.85027	3.31973	0.0684529	5.37003	6.1439	1
vcla	-3.70668	5.85021	3.31947	0.068464	5.37003	6.1439	1
grhpra	-3.70669	5.84982	3.31783	0.0685324	5.37003	6.1439	1
tmed10	1.21259	7.20974	3.313	0.0687339	7.89541	6.92387	1
aanat2	4.0913	5.71866	3.31133	0.0688038	6.36984	5.33493	1
spint2	2.32076	6.02667	3.30966	0.0688738	6.69254	5.65641	1
dlat	0.761973	8.44629	3.30833	0.0689295	8.86247	8.14509	1
vgll4b	3.70099	5.84983	3.30326	0.0691426	6.17717	5.33493	1
grb2b	2.31982	6.02591	3.30316	0.0691469	6.69295	5.65641	1
srsf3b	2.31884	6.02636	3.30287	0.069159	6.69336	5.65641	1
tle3a	3.701	5.84956	3.30214	0.0691897	6.17717	5.33493	1
rnf24	3.701	5.84956	3.30214	0.0691897	6.17717	5.33493	1
gopc	3.69772	5.85017	3.29982	0.0692875	6.17766	5.33493	1
znf143b	4.08294	5.7185	3.29908	0.0693187	6.37058	5.33493	1
esf1	-2.31721	6.02595	3.29815	0.0693578	5.6924	6.65508	1
grnb	-3.69345	5.85002	3.29793	0.0693674	5.37003	6.14223	1
ugt2b6	-3.69344	5.84996	3.29768	0.0693776	5.37003	6.14223	1
gnptab	-3.69344	5.84975	3.29681	0.0694147	5.37003	6.14223	1
dcaf5	-3.69344	5.84963	3.29627	0.0694373	5.37003	6.14223	1
atp6v1c1a	-3.69343	5.84936	3.29514	0.0694851	5.37003	6.14223	1
nat15	3.69401	5.84978	3.29247	0.0695984	6.17795	5.33493	1
limk2	4.07858	5.71837	3.29243	0.0695998	6.37086	5.33493	1
zgc:153184	4.07858	5.71837	3.29243	0.0695998	6.37086	5.33493	1
med12	4.07858	5.71837	3.29243	0.0695998	6.37086	5.33493	1
sh3d21	-3.69342	5.84871	3.29235	0.0696032	5.37003	6.14223	1
cpsf1	3.69401	5.84966	3.29195	0.0696204	6.17795	5.33493	1
sh3glb1a	4.07858	5.71825	3.29168	0.0696318	6.37086	5.33493	1
parp16	1.87137	6.08121	3.29114	0.0696546	6.95535	5.92041	1
sema3d	3.694	5.84913	3.28971	0.0697152	6.17795	5.33493	1
lin37	3.69074	5.84988	3.28803	0.0697869	6.17843	5.33493	1
st6galnac3	4.07455	5.71833	3.28679	0.0698393	6.37131	5.33493	1
zgc:171599	4.07455	5.71833	3.28679	0.0698393	6.37131	5.33493	1
col5a2a	0.833981	7.88014	3.28629	0.0698608	8.32508	7.58261	1
foxo3b	1.0496	7.45599	3.28535	0.0699009	8.01426	7.14241	1
srsf2b	-4.07211	5.71783	3.28504	0.0699139	5.37003	6.33429	1
si:dkey-188i13.10	-1.05067	7.28112	3.28174	0.0700547	7.37151	8.19625	1
fbp1a	-4.05696	5.71782	3.26471	0.0707856	5.37003	6.33286	1
agla	-0.841044	7.70145	3.2243	0.0725526	7.61786	8.29045	1
si:ch211-281g13.5	2.53593	5.91073	3.20745	0.0733036	6.83078	5.65641	1
ube2e1	2.53394	5.91062	3.20145	0.0735731	6.83104	5.65641	1
sptb	-0.821912	8.81133	3.18596	0.0742733	8.32466	9.03284	1
hmgb2b	-1.40866	6.71971	3.14414	0.0762	6.37012	7.24387	1
tmem106ba	-1.51329	6.41514	3.13374	0.0766875	6.17717	7.03868	1
bmp10	-1.5133	6.32737	3.12419	0.077138	6.17766	7.04009	1
mid1ip1l	0.98	7.49667	3.12175	0.0772538	8.07189	7.24262	1
itsn2b	1.24804	7.08182	3.11142	0.077745	7.76315	6.79485	1
atp5f1b	-0.165482	12.3099	3.10446	0.0780781	12.187	12.3149	1
brk1	-1.5122	6.53556	3.10282	0.0781568	6.17795	7.03468	1
yipf4	1.50569	6.41356	3.10148	0.0782212	7.07149	6.14223	1
notch1a	1.5055	6.45509	3.09683	0.0784447	7.07163	6.14223	1
tpm4a	-0.456199	14.0897	3.07142	0.0796798	13.9383	14.3542	1
qrsl1	-3.72369	5.78679	3.06533	0.0799792	5.37003	6.14536	1
arih1l	-3.72369	5.78673	3.06506	0.0799923	5.37003	6.14536	1
slc52a3	-3.7237	5.78666	3.06478	0.0800061	5.37003	6.14536	1
bhlhe40	0.693475	8.39352	3.06389	0.0800498	8.95622	8.29345	1
oser1	-3.72372	5.78627	3.06305	0.0800913	5.37003	6.14536	1
xrn2	-1.51177	6.23267	3.05204	0.080636	6.17766	7.03468	1
rwdd1	-1.2882	7.16047	3.05158	0.0806587	6.69254	7.58261	1
rpl26	-0.404306	11.1066	3.05053	0.0807107	10.8797	11.2366	1
eya3	-3.7082	5.78614	3.04099	0.0811862	5.37003	6.1439	1
mgrn1b	-3.7082	5.78614	3.04099	0.0811862	5.37003	6.1439	1
pcgf5b	-3.7082	5.786	3.04038	0.0812169	5.37003	6.1439	1
cyba	-3.7082	5.786	3.04038	0.0812169	5.37003	6.1439	1
klhl24b	-3.7082	5.78594	3.04011	0.0812303	5.37003	6.1439	1
fstb	-3.70821	5.78575	3.03926	0.081273	5.37003	6.1439	1
rab1bb	-3.70821	5.7856	3.03862	0.0813049	5.37003	6.1439	1
smad7	-3.70821	5.7856	3.03862	0.0813049	5.37003	6.1439	1
add3a	-0.986737	7.5573	3.038	0.0813361	7.17752	7.92267	1
zgc:86599	1.05745	7.43469	3.02946	0.0817651	7.89368	7.03338	1
mrpl13	3.7022	5.786	3.02714	0.0818824	6.17717	5.33493	1
pfkma	3.70221	5.78567	3.02569	0.0819554	6.17717	5.33493	1
eif5a	0.59837	10.3592	3.02431	0.082025	10.6826	10.0665	1
cyb5r3	-1.51175	6.64873	3.0237	0.0820563	6.17795	7.03468	1
cox6a2	-0.596965	10.3963	3.02347	0.0820678	10.0004	10.5397	1
zgc:158852	3.69813	5.78595	3.02149	0.0821678	6.17766	5.33493	1
zgc:77151	3.69813	5.78589	3.02123	0.0821813	6.17766	5.33493	1
plk3	3.69813	5.78583	3.02095	0.0821955	6.17766	5.33493	1
bmi1a	3.69813	5.78583	3.02095	0.0821955	6.17766	5.33493	1
rab40c	3.69813	5.78583	3.02095	0.0821955	6.17766	5.33493	1
ints13	3.69813	5.78583	3.02095	0.0821955	6.17766	5.33493	1
dffa	3.69814	5.78555	3.01974	0.0822566	6.17766	5.33493	1
arcn1a	3.69814	5.78529	3.01858	0.0823154	6.17766	5.33493	1
rxrba	3.69814	5.78516	3.01801	0.0823443	6.17766	5.33493	1
ankha	-3.69219	5.78587	3.01769	0.0823606	5.37003	6.14223	1
pcdh15a	-3.69218	5.78568	3.01684	0.082404	5.37003	6.14223	1
cep63	-3.69218	5.78555	3.01629	0.0824319	5.37003	6.14223	1
washc3	-3.69218	5.78554	3.01622	0.0824353	5.37003	6.14223	1
naa30	-3.69218	5.78554	3.01622	0.0824353	5.37003	6.14223	1
echdc2	-3.69218	5.78554	3.01622	0.0824353	5.37003	6.14223	1
gbp1	-3.69218	5.78548	3.01595	0.0824489	5.37003	6.14223	1
cep83	-3.69218	5.78541	3.01567	0.0824632	5.37003	6.14223	1
ppm1ba	3.69362	5.7859	3.01509	0.0824929	6.17795	5.33493	1
bdh2	-3.69217	5.78502	3.01391	0.0825529	5.37003	6.14223	1
ncs1b	3.69362	5.78557	3.01363	0.0825674	6.17795	5.33493	1
cdc27	3.69362	5.78544	3.01308	0.0825952	6.17795	5.33493	1
frem1a	3.68954	5.78553	3.00806	0.0828512	6.17843	5.33493	1
psap	-0.749139	8.73558	3.00757	0.0828766	8.5408	9.19073	1
rnf40	3.68954	5.78527	3.00688	0.0829117	6.17843	5.33493	1
csrp3	0.786703	9.45973	3.00465	0.0830257	9.78094	9.00286	1
pigs	-3.67657	5.78535	2.99416	0.083565	5.37003	6.14077	1
ptgr2	-3.67657	5.78535	2.99416	0.083565	5.37003	6.14077	1
ggnbp2	-1.5105	6.68366	2.98374	0.084105	6.17766	7.03338	1
opa3	2.31695	5.97039	2.97905	0.0843485	6.69187	5.65793	1
psmd3	1.50479	6.68442	2.95941	0.085379	7.07077	6.1439	1
mxb	-4.12057	5.64895	2.94252	0.0862758	5.37003	6.33895	1
slc38a4	-1.69205	6.3719	2.94006	0.0864073	5.95495	6.79768	1
fn1b	0.711292	9.79163	2.93731	0.0865547	10.3226	9.61185	1
slc25a20	-1.69101	6.41267	2.93712	0.0865651	5.95524	6.79068	1
sema6d	-1.69156	6.45538	2.93657	0.0865942	5.95495	6.79485	1
osgn1	-1.69156	6.45658	2.93644	0.0866012	5.95495	6.79485	1
setdb1a	-1.69145	6.45511	2.93623	0.0866128	5.95524	6.79351	1
wwc3	-1.69159	6.32617	2.9319	0.0868452	5.95524	6.79485	1
kat7b	-1.69096	6.3261	2.92952	0.0869735	5.95495	6.79203	1
vcam1b	-1.16024	7.34879	2.9289	0.0870067	6.83026	7.65144	1
h3f3b.1	1.50626	6.71878	2.9264	0.0871416	7.07077	6.14223	1
nr1d1	1.506	6.71974	2.92455	0.0872417	7.07149	6.14223	1
ednrab	-1.6931	6.28281	2.92361	0.0872923	5.95524	6.80052	1
tp53inp2	-1.69203	6.53725	2.92177	0.087392	5.95524	6.79633	1
lig3	-2.07412	6.41414	2.91371	0.0878296	5.69182	6.5052	1
vta1	-2.07426	6.37125	2.91341	0.087846	5.69182	6.50661	1
u2af2b	1.68473	6.37127	2.91337	0.087848	6.83104	5.92041	1
mat2ab	-1.22498	6.53502	2.91314	0.0878609	6.54004	7.33137	1
hmgcl	1.68446	6.37082	2.91202	0.0879215	6.83	5.92041	1
nipbla	-2.07411	6.45627	2.91194	0.0879262	5.69182	6.5052	1
nkap	-2.07359	6.45739	2.91168	0.0879405	5.6924	6.50817	1
ube2ia	-2.07301	6.4136	2.91163	0.0879427	5.6924	6.5052	1
fam131c	1.68356	6.3723	2.90944	0.0880626	6.82934	5.92215	1
dcun1d2b	-2.07409	6.32734	2.90903	0.0880848	5.69182	6.5052	1
smndc1	-2.07253	6.32646	2.90533	0.0882872	5.6924	6.50364	1
cul4a	1.68467	6.49659	2.90502	0.0883039	6.83	5.91892	1
chka	-1.69105	6.57433	2.90464	0.0883252	5.95495	6.79351	1
nabp1a	4.09212	5.64803	2.90145	0.0884999	6.36984	5.33493	1
tmem88a	1.40073	6.85069	2.90079	0.0885363	7.27768	6.33591	1
si:ch211-244b2.3	-4.08762	5.64808	2.90061	0.0885458	5.37003	6.33591	1
ap5s1	4.08737	5.64792	2.89551	0.0888268	6.37012	5.33493	1
zgc:92027	1.68467	6.53618	2.89512	0.088848	6.83026	5.91892	1
ube2v1	1.6847	6.28077	2.8924	0.0889985	6.83078	5.92041	1
tnpo2	1.6847	6.28063	2.89233	0.0890021	6.83078	5.92041	1
fblim1	1.68348	6.53607	2.89168	0.089038	6.83026	5.92215	1
pdk4	1.15984	7.32728	2.89112	0.0890689	7.69262	6.79633	1
rragca	4.08295	5.64787	2.89039	0.0891095	6.37058	5.33493	1
pacsin3	4.08295	5.64787	2.89039	0.0891095	6.37058	5.33493	1
eed	4.08295	5.64787	2.89039	0.0891095	6.37058	5.33493	1
park7	-1.40798	6.87988	2.89014	0.0891232	6.37086	7.24262	1
npc1	-1.69098	6.61146	2.88706	0.0892937	5.95577	6.79485	1
tnfrsfa	2.06691	6.49589	2.88646	0.089327	6.54074	5.65641	1
eloa	-0.787801	7.91271	2.88549	0.0893806	7.61899	8.24564	1
hspb2	2.06655	6.4977	2.88498	0.089409	6.54004	5.65793	1
camk2n1a	4.07818	5.64776	2.88445	0.0894387	6.37086	5.33493	1
hmg20a	4.07818	5.64776	2.88445	0.0894387	6.37086	5.33493	1
ankfy1	-1.69047	6.23258	2.88279	0.0895308	5.95577	6.79351	1
scarb2a	2.06818	6.28052	2.88033	0.0896676	6.54047	5.65612	1
mpi	-4.07078	5.6476	2.87926	0.0897271	5.37003	6.33429	1
lpcat4	-4.07078	5.6476	2.87926	0.0897271	5.37003	6.33429	1
otud4	-2.07391	6.23355	2.87922	0.0897295	5.69182	6.5052	1
si:ch211-199o1.2	2.06665	6.28161	2.87741	0.0898304	6.54074	5.65793	1
fscn1a	2.06654	6.28191	2.87696	0.0898557	6.54004	5.65793	1
pcdh1g1	-4.07699	5.64577	2.87471	0.0899813	5.37003	6.33015	1
rps3	-0.3401	11.2994	2.86979	0.0902564	11.1973	11.4947	1
rpl8	-0.482232	10.7526	2.86337	0.0906173	10.4804	10.9116	1
igfbp6b	1.68436	6.23356	2.86084	0.0907598	6.83026	5.92041	1
cdh17	-4.05418	5.64721	2.85876	0.0908776	5.37003	6.33286	1
axin1	1.68334	6.2329	2.85741	0.0909536	6.83	5.92215	1
ywhaz	-1.0676	7.45664	2.85631	0.0910159	6.95572	7.72829	1
si:dkey-238c7.16	2.06704	6.22731	2.85514	0.0910824	6.54074	5.65641	1
selenol	-2.07459	6.1847	2.84343	0.0917482	5.69182	6.50661	1
rgcc	-2.07371	6.18519	2.8425	0.0918011	5.6924	6.50661	1
zgc:112962	-2.07372	6.18502	2.84233	0.0918107	5.6924	6.50661	1
naa15a	-2.07372	6.18476	2.84208	0.0918254	5.6924	6.50661	1
sgce	-2.07372	6.18385	2.84117	0.0918772	5.6924	6.50661	1
aldh18a1	-2.0728	6.18431	2.83914	0.0919934	5.6924	6.5052	1
cwc25	1.68322	6.64991	2.83656	0.0921411	6.83078	5.92215	1
plekhj1	-1.6933	6.18549	2.83649	0.0921452	5.95524	6.79768	1
mbnl1	-1.69293	6.18536	2.83563	0.0921944	5.95577	6.79768	1
naa10	1.5038	6.78659	2.83481	0.0922416	7.07174	6.1439	1
ing3	1.21967	6.61101	2.82719	0.0926803	7.37094	6.50364	1
apeh	-1.69004	6.18417	2.82402	0.0928638	5.95577	6.79351	1
pecam1	2.06718	6.18508	2.82217	0.0929707	6.54074	5.65641	1
taf13	2.06743	6.18428	2.82157	0.0930054	6.53961	5.65641	1
vti1a	2.06621	6.18494	2.8192	0.093143	6.54031	5.65793	1
casq2	0.682849	9.93941	2.81545	0.0933605	10.2281	9.53979	1
ptpn23a	1.68538	6.18401	2.80661	0.0938764	6.83078	5.91892	1
pls3	1.50681	6.81828	2.80615	0.0939037	7.07077	6.14223	1
mpped2	-1.41346	7.05627	2.7907	0.0948125	6.37012	7.24647	1
nexn	-0.76361	9.25162	2.78853	0.0949415	8.92662	9.60177	1
myl12.2	-2.07774	6.13497	2.78656	0.095058	5.6924	6.50958	1
hbs1l	1.21972	6.64846	2.78578	0.0951047	7.37118	6.50364	1
ifi30	-2.07677	6.1352	2.78346	0.0952424	5.69182	6.50817	1
srprb	-2.07678	6.1347	2.78264	0.095291	5.69182	6.50817	1
tbc1d23	-2.07613	6.1347	2.78186	0.0953375	5.6924	6.50817	1
farsb	-2.07326	6.13405	2.77202	0.095925	5.69182	6.5052	1
tmem258	-2.07262	6.1342	2.7715	0.0959561	5.6924	6.5052	1
grsf1	-1.22621	6.68409	2.76974	0.0960615	6.54074	7.33637	1
thy1	-3.72748	5.71894	2.76496	0.0963488	5.37003	6.14536	1
riok1	-3.72748	5.71894	2.76496	0.0963488	5.37003	6.14536	1
aftpha	-3.1688	6.18571	2.75881	0.0967202	5.37003	5.92041	1
sh2d3cb	2.06767	6.13346	2.75453	0.0969794	6.54031	5.65641	1
flj11011l	2.0657	6.13335	2.74939	0.0972917	6.54074	5.65793	1
dsc2l	1.50195	6.85225	2.74847	0.0973475	7.07149	6.14536	1
nedd8l	-3.70954	5.71907	2.74411	0.0976135	5.37003	6.1439	1
slc27a1b	-3.70954	5.71907	2.74411	0.0976135	5.37003	6.1439	1
cwf19l1	-3.70954	5.71906	2.74407	0.0976157	5.37003	6.1439	1
f11r.1	-3.70954	5.71901	2.74384	0.0976296	5.37003	6.1439	1
sat2b	-3.70954	5.71894	2.74357	0.0976467	5.37003	6.1439	1
btbd3a	-3.70954	5.71893	2.74353	0.0976489	5.37003	6.1439	1
pfdn1	-3.70954	5.71893	2.74353	0.0976489	5.37003	6.1439	1
tigarb	-3.70954	5.71867	2.74239	0.0977186	5.37003	6.1439	1
klhl11	-3.70954	5.71867	2.74235	0.0977208	5.37003	6.1439	1
e4f1	-3.70954	5.71854	2.74181	0.097754	5.37003	6.1439	1
atf6	-3.70955	5.71827	2.74063	0.097826	5.37003	6.1439	1
dhrs13a.3	1.21787	6.6843	2.73123	0.0984033	7.37151	6.50661	1
lmbrd2b	3.70328	5.71866	2.73063	0.0984404	6.17717	5.33493	1
socs1a	3.6985	5.71874	2.72542	0.0987622	6.17766	5.33493	1
lig1	3.6985	5.71862	2.72491	0.0987934	6.17766	5.33493	1
nudt2	3.6985	5.71862	2.72491	0.0987934	6.17766	5.33493	1
fam241a	3.6985	5.71861	2.72488	0.0987957	6.17766	5.33493	1
si:ch211-244b2.2	3.6985	5.71835	2.72374	0.0988658	6.17766	5.33493	1
ccdc84	3.6985	5.71822	2.72317	0.0989015	6.17766	5.33493	1
tmem167b	3.6985	5.71822	2.72317	0.0989015	6.17766	5.33493	1
pygo2	3.6985	5.71822	2.72317	0.0989015	6.17766	5.33493	1
si:dkey-169i5.4	3.6985	5.71795	2.722	0.098974	6.17766	5.33493	1
tor1	3.6985	5.71795	2.722	0.098974	6.17766	5.33493	1
rps27a	-0.334863	11.2992	2.7217	0.0989928	11.1269	11.416	1
tspan17	-3.69106	5.71847	2.71952	0.0991278	5.37003	6.14223	1
ighmbp2	-3.69106	5.71847	2.71952	0.0991278	5.37003	6.14223	1
sema6a	3.69327	5.71863	2.71878	0.0991739	6.17795	5.33493	1
si:dkey-276j7.1	-1.68945	6.1331	2.71859	0.0991854	5.95524	6.79351	1
mgll	-3.69106	5.71821	2.71838	0.0991984	5.37003	6.14223	1
elp6	-3.69106	5.71821	2.71838	0.0991984	5.37003	6.14223	1
nrd1b	-3.69106	5.7182	2.71835	0.0992006	5.37003	6.14223	1
stambpa	-3.69106	5.7182	2.71835	0.0992006	5.37003	6.14223	1
fam149b1	-3.69106	5.7182	2.71835	0.0992006	5.37003	6.14223	1
clasrp	3.69327	5.7185	2.71824	0.0992074	6.17795	5.33493	1
surf2	3.69327	5.7185	2.7182	0.0992097	6.17795	5.33493	1
map2k2a	3.69327	5.7185	2.7182	0.0992097	6.17795	5.33493	1
ciao2b	3.69327	5.71837	2.71766	0.0992433	6.17795	5.33493	1
vstm4a	3.69327	5.71837	2.71766	0.0992433	6.17795	5.33493	1
rps9	-0.346999	11.2163	2.71687	0.0992925	11.1857	11.4874	1
zgc:153317	-3.69105	5.71781	2.71663	0.0993072	5.37003	6.14223	1
trim33	-3.17252	6.08223	2.71554	0.0993755	5.37003	5.92215	1
cldn7a	3.69327	5.71783	2.71533	0.0993886	6.17795	5.33493	1
calr3a	-1.1938	7.30381	2.71197	0.0995981	6.69336	7.50642	1
tmem204	3.68848	5.71818	2.7113	0.09964	6.17843	5.33493	1
isg15	-1.07481	6.81982	2.70806	0.099842	6.9561	7.73407	1
mtif2	3.16527	6.08129	2.69937	0.100388	5.95524	5.33493	1
mcee	3.16527	6.08121	2.69931	0.100392	5.95524	5.33493	1
psmg2	-3.67294	5.71795	2.69601	0.1006	5.37003	6.14077	1
si:ch211-165i18.2	-3.67293	5.71781	2.69542	0.100637	5.37003	6.14077	1
zgc:63569	-3.67293	5.71781	2.69542	0.100637	5.37003	6.14077	1
si:dkey-204f11.64	-3.67293	5.71768	2.69484	0.100674	5.37003	6.14077	1
ybx1	0.142752	12.4906	2.68709	0.101164	12.6342	12.4546	1
snd1	1.15619	7.1866	2.68436	0.101338	7.6921	6.79903	1
rpl23	-0.583421	10.2857	2.68433	0.10134	10.0152	10.5404	1
ndufa10	-0.813962	7.75078	2.67386	0.102008	7.45824	8.0879	1
rps15	-0.564461	10.3572	2.67163	0.102151	10.0865	10.593	1
gmpr	0.75741	9.01365	2.65879	0.102979	9.278	8.54403	1
rpl9	-0.716823	9.70605	2.65818	0.103019	9.20359	9.84519	1
cpox	-2.07234	6.0811	2.65755	0.10306	5.6924	6.5052	1
arl9	-3.1639	6.02634	2.65284	0.103365	5.37003	5.91892	1
si:ch211-262i1.6	3.16527	6.02739	2.65075	0.103501	5.95524	5.33493	1
coasy	3.16527	6.0265	2.64978	0.103564	5.95524	5.33493	1
exoc3l4	-2.06953	6.0809	2.64892	0.10362	5.69182	6.50364	1
tsfm	-2.33472	5.91169	2.6476	0.103706	5.6924	6.65949	1
pes	-1.27359	6.41357	2.64742	0.103718	6.37058	7.14241	1
arhgap21a	2.06851	6.08124	2.64572	0.103829	6.54031	5.65641	1
mrpl32	1.22137	6.75209	2.64504	0.103874	7.36996	6.50364	1
si:dkey-110k5.6	2.06799	6.08074	2.64333	0.103985	6.54074	5.65641	1
psmd12	2.06669	6.08141	2.64139	0.104112	6.53961	5.65793	1
trpc4apb	2.06529	6.08157	2.6395	0.104236	6.5402	5.65822	1
dusp1	2.06537	6.0815	2.63849	0.104302	6.54031	5.65793	1
foxp1b	2.06483	6.08107	2.63624	0.10445	6.54074	5.65793	1
ndufs2	0.685342	8.29203	2.61747	0.105693	8.61917	7.97891	1
cct2	-0.717133	8.39318	2.61597	0.105793	7.9557	8.54314	1
acat1	0.973846	7.81869	2.61455	0.105888	7.69342	6.92255	1
imp3	-3.17739	5.97056	2.59876	0.106947	5.37003	5.92215	1
rrbp1b	-3.17743	5.96978	2.59765	0.107022	5.37003	5.92215	1
gdi1	-2.31189	5.91052	2.58906	0.107604	5.6924	6.65508	1
itga3b	1.26597	6.5364	2.58842	0.107647	7.17882	6.33734	1
nmrk2	-0.761125	8.85132	2.58808	0.107671	8.27723	8.92509	1
rai14	-1.19029	7.21071	2.58791	0.107682	6.69187	7.50516	1
caap1	1.18684	6.91135	2.58719	0.107731	7.54116	6.6566	1
sntb1	-3.16901	5.97007	2.58687	0.107753	5.37003	5.92041	1
lmnb2	-3.16901	5.96966	2.58627	0.107794	5.37003	5.92041	1
jupa	-1.19029	7.20789	2.58575	0.107829	6.69336	7.50397	1
ryr1b	-1.19412	6.94213	2.58307	0.108012	6.69336	7.50642	1
edc3	3.16752	5.97048	2.58075	0.10817	5.95495	5.33493	1
cox6a1	3.16528	5.97049	2.57789	0.108366	5.95524	5.33493	1
baxa	3.16528	5.9704	2.57777	0.108374	5.95524	5.33493	1
bmp16	-3.16128	5.9701	2.57702	0.108425	5.37003	5.91892	1
lamtor2	-3.16127	5.96986	2.57665	0.108451	5.37003	5.91892	1
lclat1	3.16369	5.97073	2.5766	0.108454	5.95577	5.33493	1
rnf130	-3.16126	5.9696	2.57624	0.108479	5.37003	5.91892	1
cpsf6	-1.27378	6.61193	2.57592	0.108501	6.37058	7.14368	1
faua	-0.729028	9.42573	2.54858	0.110394	9.01562	9.66019	1
tlk1a	1.68605	6.08133	2.54671	0.110524	6.82934	5.92041	1
tcf3b	1.26639	6.61113	2.54558	0.110603	7.17693	6.33591	1
ppp6r3	-1.27317	6.64816	2.54295	0.110787	6.37058	7.14241	1
fhl2b	1.08166	6.57317	2.53353	0.11145	7.45824	6.6537	1
sept9a	0.807417	7.63196	2.51883	0.112494	8.12509	7.42455	1
si:dkey-72l14.4	-2.08086	6.02721	2.51395	0.112843	5.6924	6.50817	1
gpd1b	-1.18917	7.07985	2.50562	0.113441	6.69254	7.50397	1
ilvbl	-3.18086	5.91193	2.50305	0.113626	5.37003	5.92215	1
acaa2	0.974167	7.61292	2.50258	0.11366	7.69262	6.92123	1
tpcn3	-2.0763	6.02709	2.50251	0.113665	5.6924	6.50661	1
map3k7	-2.07591	6.02747	2.50215	0.113691	5.69182	6.50661	1
mrpl36	-2.07162	6.02702	2.49045	0.114539	5.69182	6.5052	1
lactb	-2.072	6.02646	2.49015	0.114561	5.6924	6.5052	1
atf6b	-2.072	6.02606	2.48873	0.114664	5.6924	6.5052	1
mindy1	-3.16912	5.91187	2.48817	0.114705	5.37003	5.92041	1
ttc7b	2.07103	6.02709	2.4878	0.114732	6.54004	5.65641	1
agpat2	-2.0716	6.02611	2.48722	0.114774	5.69182	6.5052	1
nf2b	-3.16912	5.91107	2.48666	0.114815	5.37003	5.92041	1
paox1	-3.16912	5.91095	2.48642	0.114833	5.37003	5.92041	1
tob1b	0.762357	7.77233	2.48594	0.114868	8.17769	7.51006	1
snx30	2.06978	6.02704	2.48468	0.114959	6.54031	5.65641	1
kdm6bb	-0.98706	7.37306	2.48397	0.115012	7.07149	7.79827	1
stk17b	3.16851	5.91143	2.48207	0.11515	5.95495	5.33493	1
lsg1	3.16851	5.9113	2.48184	0.115167	5.95495	5.33493	1
pleca	-0.674793	8.24477	2.48035	0.115277	7.95665	8.50492	1
rbm39b	2.06883	6.02603	2.47911	0.115368	6.54074	5.65641	1
zgc:110158	3.16529	5.91158	2.47842	0.115418	5.95524	5.33493	1
si:ch211-206k20.5	3.16529	5.91119	2.47768	0.115472	5.95524	5.33493	1
slc25a43	2.06573	6.02723	2.47578	0.115612	6.54004	5.65793	1
rbm5	3.16271	5.91167	2.47577	0.115613	5.95577	5.33493	1
ube2j1	3.16271	5.9112	2.47487	0.115679	5.95577	5.33493	1
srek1	3.1627	5.91107	2.47464	0.115696	5.95577	5.33493	1
rps6ka3b	-3.15804	5.91166	2.47424	0.115725	5.37003	5.91892	1
gcsha	-3.15804	5.91154	2.474	0.115743	5.37003	5.91892	1
me2	-3.15803	5.91148	2.47388	0.115752	5.37003	5.91892	1
ndufaf5	3.1627	5.91054	2.47363	0.115771	5.95577	5.33493	1
pi4k2a	-3.15802	5.91128	2.47348	0.115781	5.37003	5.91892	1
med13b	-3.15801	5.91101	2.47296	0.115819	5.37003	5.91892	1
iqgap2	2.06448	6.02725	2.47289	0.115825	6.54031	5.65793	1
atp6v1ba	2.06447	6.02659	2.47061	0.115993	6.54031	5.65793	1
pofut1	-3.7306	5.64846	2.46421	0.116466	5.37003	6.14536	1
tmem128	-3.7306	5.64846	2.46421	0.116466	5.37003	6.14536	1
mapre3b	-1.22272	6.88146	2.4579	0.116935	6.54031	7.33392	1
LOC561325	-3.71066	5.64846	2.44411	0.117967	5.37003	6.1439	1
baiap2a	-3.71066	5.64846	2.44411	0.117967	5.37003	6.1439	1
ubxn8	-3.71066	5.64846	2.44411	0.117967	5.37003	6.1439	1
galcb	-3.71066	5.64846	2.44411	0.117967	5.37003	6.1439	1
mrpl10	-3.71066	5.64846	2.44411	0.117967	5.37003	6.1439	1
gtpbp1l	-3.71066	5.64845	2.44406	0.11797	5.37003	6.1439	1
exosc4	-3.71066	5.64833	2.44355	0.118009	5.37003	6.1439	1
actr6	-3.71066	5.64833	2.44355	0.118009	5.37003	6.1439	1
qars	-3.71066	5.64806	2.44245	0.118092	5.37003	6.1439	1
ctdnep1a	-3.71066	5.64806	2.44245	0.118092	5.37003	6.1439	1
cxxc1b	-3.71066	5.64806	2.44245	0.118092	5.37003	6.1439	1
zgc:113531	-3.71066	5.64806	2.44245	0.118092	5.37003	6.1439	1
sos2	-3.71066	5.64806	2.44245	0.118092	5.37003	6.1439	1
zgc:136864	-1.08759	6.68412	2.44059	0.118232	6.69295	7.42325	1
nt5c2a	-0.730982	7.89673	2.43883	0.118364	7.61952	8.19316	1
znf326	1.26434	6.72082	2.43207	0.118875	7.17728	6.33895	1
relch	3.70418	5.64777	2.43121	0.118941	6.17717	5.33493	1
rint1	3.6988	5.64813	2.42738	0.119232	6.17766	5.33493	1
nr3c2	3.6988	5.64813	2.42738	0.119232	6.17766	5.33493	1
dhrs13b	3.6988	5.64813	2.42738	0.119232	6.17766	5.33493	1
nrarpb	3.6988	5.64813	2.42738	0.119232	6.17766	5.33493	1
dpagt1	3.6988	5.64812	2.42734	0.119235	6.17766	5.33493	1
slc25a19	3.6988	5.64812	2.42734	0.119235	6.17766	5.33493	1
vti1b	3.6988	5.64812	2.42734	0.119235	6.17766	5.33493	1
dnmt3aa	3.6988	5.64812	2.42734	0.119235	6.17766	5.33493	1
bag4	3.69881	5.648	2.42683	0.119274	6.17766	5.33493	1
gipc2	3.69881	5.64773	2.42573	0.119357	6.17766	5.33493	1
pdcd2l	3.69881	5.64773	2.42573	0.119357	6.17766	5.33493	1
skap2	3.69881	5.64773	2.42573	0.119357	6.17766	5.33493	1
tuba8l3	1.06772	6.81863	2.4219	0.11965	7.61899	6.79633	1
uck1	3.69298	5.64802	2.42109	0.119711	6.17795	5.33493	1
snip1	3.69298	5.64802	2.42109	0.119711	6.17795	5.33493	1
ftsj1	3.69298	5.64801	2.42105	0.119715	6.17795	5.33493	1
tmem234	3.69298	5.64801	2.42105	0.119715	6.17795	5.33493	1
tnfaip6	3.69298	5.64801	2.42105	0.119715	6.17795	5.33493	1
nelfcd	-3.69012	5.64786	2.42102	0.119717	5.37003	6.14223	1
pdcd10b	-3.69012	5.64786	2.42102	0.119717	5.37003	6.14223	1
aifm2	-3.69012	5.64786	2.42102	0.119717	5.37003	6.14223	1
gng13b	3.69298	5.64788	2.42054	0.119753	6.17795	5.33493	1
zfand4	-3.69012	5.64759	2.41992	0.119801	5.37003	6.14223	1
pnpla7a	-3.69012	5.64759	2.41992	0.119801	5.37003	6.14223	1
ppp1r3cb	-0.712896	9.07705	2.41984	0.119807	8.76225	9.3867	1
rspry1	3.69298	5.64761	2.41945	0.119837	6.17795	5.33493	1
dtna	3.68759	5.64797	2.41562	0.12013	6.17843	5.33493	1
letmd1	3.68759	5.64796	2.41557	0.120134	6.17843	5.33493	1
prpf38a	3.68759	5.64757	2.41398	0.120256	6.17843	5.33493	1
desi1a	1.26887	6.75258	2.41189	0.120417	7.17857	6.33286	1
cox6b1	0.709154	8.69078	2.4076	0.120747	8.86301	8.19012	1
pcca	0.974886	7.51731	2.40244	0.121146	7.69313	6.91978	1
pigr	-3.6699	5.64759	2.3999	0.121343	5.37003	6.14077	1
accs	-3.6699	5.64759	2.3999	0.121343	5.37003	6.14077	1
npr3	-3.6699	5.64758	2.39985	0.121347	5.37003	6.14077	1
neo1a	-3.66989	5.64719	2.39826	0.12147	5.37003	6.14077	1
eef1a1a	-3.66989	5.64719	2.39826	0.12147	5.37003	6.14077	1
sept7b	-1.27382	6.78619	2.39035	0.122086	6.37012	7.14368	1
trpc4apa	-0.798602	7.77008	2.3898	0.122129	7.37151	7.98103	1
creg1	-0.673735	8.31706	2.38542	0.122472	7.95475	8.50492	1
acadl	-0.902683	7.68622	2.38432	0.122558	7.07174	7.72829	1
si:ch1073-291c23.2	0.976671	7.49589	2.38429	0.122561	7.69203	6.91846	1
exosc3	-3.18474	5.85116	2.38034	0.122871	5.37003	5.92215	1
xab2	-3.18474	5.85103	2.38007	0.122892	5.37003	5.92215	1
mccc1	-1.22463	6.96977	2.37976	0.122917	6.54074	7.33515	1
fbxl14a	-3.18479	5.85025	2.37836	0.123027	5.37003	5.92215	1
smad4a	-3.18482	5.8498	2.37736	0.123105	5.37003	5.92215	1
aip	-1.22984	7.05545	2.3726	0.123481	6.54004	7.33892	1
kmt5aa	1.26827	6.78641	2.36849	0.123807	7.17787	6.33429	1
vim	0.907788	7.45538	2.36408	0.124157	7.89444	7.14103	1
tuba8l	0.844036	7.59376	2.36251	0.124282	7.95665	7.24262	1
nubpl	-3.16924	5.8507	2.36115	0.12439	5.37003	5.92041	1
pla1a	-1.86875	6.16249	2.36085	0.124414	5.73253	6.47738	1
fam210ab	-3.16924	5.85045	2.3606	0.124434	5.37003	5.92041	1
spag9a	-3.16924	5.85045	2.3606	0.124434	5.37003	5.92041	1
bag5	-3.16924	5.85033	2.36033	0.124456	5.37003	5.92041	1
cul1b	-3.16924	5.85	2.35959	0.124515	5.37003	5.92041	1
tmpob	-3.16924	5.84994	2.35945	0.124526	5.37003	5.92041	1
abcb8	-3.16924	5.84961	2.35871	0.124585	5.37003	5.92041	1
bcas3	3.16962	5.85015	2.35622	0.124784	5.95495	5.33493	1
psmc4	-1.34766	6.41418	2.35552	0.12484	6.17766	6.92123	1
zgc:55262	3.16963	5.84982	2.3555	0.124842	5.95495	5.33493	1
coq4	3.16964	5.8491	2.3539	0.12497	5.95495	5.33493	1
ctsba	-1.34782	6.45559	2.35342	0.125009	6.17766	6.92255	1
zgc:175214	-1.34782	6.45607	2.35337	0.125013	6.17766	6.92255	1
cxcl12b	1.22022	7.13384	2.35237	0.125092	7.37062	6.5052	1
ccnt2b	-1.34758	6.45519	2.35217	0.125109	6.17717	6.91846	1
bloc1s6	1.21245	6.94298	2.35163	0.125152	7.37094	6.50958	1
trioa	3.1653	5.8503	2.35162	0.125153	5.95524	5.33493	1
luc7l3	-1.09108	6.75452	2.35161	0.125154	6.69254	7.42705	1
dnaja3a	-1.34733	6.45607	2.35156	0.125158	6.17766	6.91978	1
azin1a	3.1653	5.84991	2.35074	0.125224	5.95524	5.33493	1
tbx5b	3.1653	5.84958	2.35001	0.125283	5.95524	5.33493	1
ezrb	-1.34766	6.32569	2.34803	0.125442	6.17766	6.92123	1
thoc3	3.16162	5.84992	2.34683	0.125538	5.95577	5.33493	1
tfdp2	3.16161	5.84971	2.34636	0.125576	5.95577	5.33493	1
ppp2r1bb	-1.34729	6.49604	2.34533	0.125659	6.17766	6.91978	1
bcas2	-1.34729	6.49735	2.34506	0.12568	6.17766	6.91978	1
rnf10	0.652445	8.52637	2.34311	0.125838	8.86301	8.23861	1
sft2d1	-3.15433	5.84967	2.34181	0.125943	5.37003	5.91892	1
thap7	-3.15433	5.84967	2.34181	0.125943	5.37003	5.91892	1
si:dkey-251i10.3	-3.1543	5.84922	2.34077	0.126027	5.37003	5.91892	1
gatd3a	-1.27075	6.81823	2.34038	0.126059	6.37058	7.14103	1
atg101	-3.15429	5.84895	2.34015	0.126078	5.37003	5.91892	1
arhgef7b	-1.34837	6.53783	2.33905	0.126166	6.17843	6.92532	1
tnni1b	-0.303192	11.3377	2.33616	0.126401	11.1521	11.413	1
glrx3	-1.34703	6.53556	2.33456	0.126531	6.17795	6.91846	1
snap23.1	1.26821	6.81748	2.33104	0.126817	7.17822	6.33429	1
pcyt2	1.34048	6.41373	2.32936	0.126954	6.95572	6.14223	1
dbnlb	1.34048	6.41424	2.32935	0.126955	6.95572	6.14223	1
efhd1	1.3399	6.41391	2.32768	0.127091	6.95572	6.1439	1
cyb5r1	1.34064	6.45542	2.32733	0.12712	6.95572	6.14077	1
bbip1	-1.34814	6.57554	2.32396	0.127395	6.17795	6.92255	1
ube2d2l	1.34081	6.32553	2.3232	0.127457	6.9561	6.14077	1
lmo7a	-0.694364	9.40404	2.32288	0.127484	9.0431	9.65901	1
pafah1b3	1.33974	6.49697	2.31818	0.127869	6.95535	6.1439	1
zgc:85777	-0.695672	7.86746	2.31467	0.128159	7.69291	8.24362	1
atp6v0a1a	1.34073	6.53604	2.31192	0.128385	6.95648	6.14223	1
dnajc7	1.263	6.81849	2.31127	0.128439	7.17941	6.33734	1
stx4	1.34002	6.53624	2.30974	0.128566	6.95648	6.1439	1
cux1b	-2.08421	5.97121	2.30176	0.129227	5.6924	6.50817	1
myoz2b	0.635944	8.36147	2.29724	0.129604	8.69282	8.09314	1
calm1a	-0.696486	7.78824	2.29655	0.129662	7.69239	8.24667	1
rps19	-0.648874	9.74255	2.29017	0.130196	9.41592	9.99513	1
pawr	1.34119	6.61229	2.28156	0.13092	6.9561	6.14077	1
dkk3b	1.34121	6.23242	2.27945	0.131098	6.9561	6.14077	1
fbxo7	1.34074	6.23326	2.27821	0.131203	6.95472	6.14223	1
unc45b	0.626124	8.71953	2.27807	0.131215	9.34962	8.72834	1
scn4ab	1.33915	6.23375	2.27371	0.131584	6.95535	6.14536	1
synm	-0.681014	8.92804	2.27064	0.131845	8.65769	9.2439	1
stard3nl	2.07161	5.9698	2.26663	0.132187	6.54031	5.65641	1
tufm	0.893958	7.59454	2.26335	0.132467	7.76394	7.03868	1
sec22ba	2.07009	5.96975	2.26329	0.132472	6.54074	5.65641	1
ssb	-1.34846	6.68515	2.25978	0.132773	6.17766	6.92255	1
wls	1.07191	7.18443	2.25673	0.133034	7.61899	6.79351	1
dync1i2a	-1.34985	6.18533	2.25508	0.133177	6.17795	6.92399	1
asah1b	-2.06522	5.9696	2.25388	0.13328	5.6924	6.50364	1
hspd1	0.687445	7.82084	2.24919	0.133684	8.27838	7.66082	1
prpf19	2.06162	5.9702	2.24699	0.133875	6.54074	5.65793	1
rbm14b	2.05984	5.97041	2.24408	0.134126	6.54101	5.65793	1
rnasekb	1.26242	6.8822	2.23942	0.134531	7.17752	6.33895	1
pim1	1.07072	7.15924	2.23344	0.135053	7.61847	6.79485	1
ubap2l	-1.34864	6.71977	2.23285	0.135104	6.17766	6.92255	1
fam168b	-3.18878	5.78658	2.22966	0.135384	5.37003	5.92215	1
zgc:154055	-3.18879	5.78651	2.22949	0.135399	5.37003	5.92215	1
LOC554962	-3.1888	5.78632	2.229	0.135441	5.37003	5.92215	1
blmh	-3.1888	5.78625	2.22883	0.135456	5.37003	5.92215	1
tango2	-3.18881	5.78619	2.22868	0.135469	5.37003	5.92215	1
mfap4	-3.18881	5.78612	2.22853	0.135483	5.37003	5.92215	1
snx15	-3.18882	5.78598	2.22818	0.135514	5.37003	5.92215	1
ostc	-3.18882	5.78592	2.22803	0.135527	5.37003	5.92215	1
foxn3	-3.18883	5.78586	2.22787	0.13554	5.37003	5.92215	1
aamdc	-3.18883	5.78585	2.22786	0.135542	5.37003	5.92215	1
cited4b	-1.10267	6.61176	2.22296	0.135972	6.54031	7.24137	1
gpr182	-1.07516	7.02784	2.22085	0.136158	6.8296	7.58386	1
arl4ab	0.91613	7.232	2.21813	0.136398	8.01498	7.24137	1
atp5fa1	0.186959	11.89	2.21551	0.13663	12.0108	11.7889	1
zgc:66433	-1.273	6.97092	2.21022	0.137099	6.37131	7.14241	1
cd81b	-3.16936	5.78637	2.20833	0.137267	5.37003	5.92041	1
dbr1	-3.16936	5.78618	2.20786	0.137309	5.37003	5.92041	1
tbl1xr1b	-3.16936	5.78618	2.20786	0.137309	5.37003	5.92041	1
fam135a	-3.16936	5.78618	2.20786	0.137309	5.37003	5.92041	1
trim47	-3.16936	5.78612	2.20773	0.137321	5.37003	5.92041	1
hpf1	-3.16936	5.78605	2.20756	0.137336	5.37003	5.92041	1
gng10	-3.16936	5.78593	2.20725	0.137363	5.37003	5.92041	1
traf7	-3.16936	5.78585	2.20706	0.13738	5.37003	5.92041	1
galnt10	-3.16936	5.78585	2.20705	0.137381	5.37003	5.92041	1
plekhm1	-3.16936	5.78579	2.20689	0.137395	5.37003	5.92041	1
lrrc40	-3.16936	5.78579	2.20689	0.137395	5.37003	5.92041	1
rc3h1b	-3.16936	5.78566	2.20658	0.137423	5.37003	5.92041	1
ppil2	3.17076	5.78614	2.20552	0.137517	5.95495	5.33493	1
mospd2	3.17076	5.78614	2.20552	0.137517	5.95495	5.33493	1
zgc:112980	3.17076	5.78607	2.20536	0.137531	5.95495	5.33493	1
wdr75	-3.16936	5.78513	2.20525	0.137541	5.37003	5.92041	1
plxdc2	3.17076	5.78601	2.20522	0.137545	5.95495	5.33493	1
spryd3	3.17076	5.78599	2.20516	0.13755	5.95495	5.33493	1
ints11	3.17076	5.78594	2.20505	0.13756	5.95495	5.33493	1
zgc:63587	3.17077	5.78581	2.2047	0.13759	5.95495	5.33493	1
zgc:112052	3.17077	5.78581	2.2047	0.13759	5.95495	5.33493	1
nvl	3.17077	5.78568	2.20439	0.137619	5.95495	5.33493	1
fgf3	3.17077	5.78529	2.20342	0.137705	5.95495	5.33493	1
hspb3	3.17078	5.78515	2.20308	0.137735	5.95495	5.33493	1
mtif3	3.17078	5.78514	2.20307	0.137737	5.95495	5.33493	1
rab5aa	-1.26556	6.93924	2.20279	0.137761	6.37058	7.13838	1
ctdspl2a	-2.31492	5.84941	2.2024	0.137796	5.69182	6.6566	1
rnf213b	-1.08963	6.85014	2.20122	0.137902	6.69336	7.42455	1
zbtb2b	3.16531	5.78627	2.20011	0.138001	5.95524	5.33493	1
eral1	3.16531	5.78608	2.19965	0.138042	5.95524	5.33493	1
lrrc8aa	3.16531	5.78581	2.19899	0.138101	5.95524	5.33493	1
obsl1a	-0.902527	7.49877	2.19855	0.13814	7.07149	7.72829	1
brd1b	3.16531	5.78557	2.19838	0.138156	5.95524	5.33493	1
btd	3.16531	5.78556	2.19836	0.138157	5.95524	5.33493	1
fam102ab	3.16531	5.78542	2.19802	0.138188	5.95524	5.33493	1
tmtc2a	3.16531	5.78536	2.19787	0.138202	5.95524	5.33493	1
bud23	3.16531	5.7853	2.19771	0.138216	5.95524	5.33493	1
hmbsa	3.16531	5.78529	2.1977	0.138217	5.95524	5.33493	1
lyrm4	3.1605	5.78585	2.19424	0.138527	5.95577	5.33493	1
loxl3b	3.16049	5.7857	2.19388	0.138559	5.95577	5.33493	1
dvl2	3.16049	5.78564	2.19373	0.138574	5.95577	5.33493	1
kctd7	3.16049	5.78564	2.19373	0.138574	5.95577	5.33493	1
cyp1d1	3.16049	5.78564	2.19373	0.138574	5.95577	5.33493	1
sema4c	3.16049	5.78564	2.19371	0.138575	5.95577	5.33493	1
rad1	3.16049	5.78537	2.19306	0.138634	5.95577	5.33493	1
rarres3l	3.16049	5.78537	2.19306	0.138634	5.95577	5.33493	1
fam45a	3.16049	5.78537	2.19306	0.138634	5.95577	5.33493	1
eif4ebp3l	0.970253	7.59373	2.19166	0.13876	7.54031	6.79768	1
si:dkeyp-69e1.8	-3.15056	5.78597	2.18765	0.139121	5.37003	5.91892	1
tmod4	-3.15055	5.78578	2.18718	0.139164	5.37003	5.91892	1
metrnla	-3.15054	5.7856	2.18671	0.139206	5.37003	5.91892	1
rtn4b	-3.15053	5.7854	2.18621	0.139252	5.37003	5.91892	1
cipca	-3.15052	5.78533	2.18604	0.139267	5.37003	5.91892	1
cops9	-3.15051	5.78512	2.18552	0.139314	5.37003	5.91892	1
psph	-3.25467	5.73491	2.18551	0.139315	5.37003	5.95298	1
mrps9	1.34066	6.75223	2.17838	0.139962	6.95648	6.14223	1
ntn1b	-3.73308	5.57463	2.17559	0.140216	5.37003	6.14536	1
zgc:174653	-3.73308	5.57463	2.17559	0.140216	5.37003	6.14536	1
zgc:174696	-3.73308	5.57463	2.17559	0.140216	5.37003	6.14536	1
mmadhc	-1.08913	6.88183	2.1572	0.141903	6.69254	7.42455	1
ftr50	-3.71155	5.57423	2.15603	0.142012	5.37003	6.1439	1
cmtm7	-3.71155	5.57423	2.15603	0.142012	5.37003	6.1439	1
emg1	-3.71155	5.57423	2.15603	0.142012	5.37003	6.1439	1
zgc:153675	-3.71155	5.57423	2.15603	0.142012	5.37003	6.1439	1
taf6l	-3.71155	5.57423	2.15603	0.142012	5.37003	6.1439	1
supt3h	-3.71155	5.57423	2.15603	0.142012	5.37003	6.1439	1
rpl27a	-0.629777	8.62052	2.15571	0.142041	8.41531	8.94811	1
idh3a	0.688586	7.66702	2.1554	0.142069	8.27747	7.65731	1
ank1a	1.08437	7.28146	2.15436	0.142166	7.45815	6.65508	1
zranb2	1.34134	6.78616	2.15045	0.142528	6.95535	6.14223	1
fgd6	3.70489	5.57393	2.14642	0.142903	6.17717	5.33493	1
c2cd4a	3.70489	5.57393	2.14642	0.142903	6.17717	5.33493	1
rps20	-0.651162	9.61714	2.14361	0.143165	9.20467	9.78033	1
tmem38a	-1.34761	6.81837	2.14316	0.143207	6.17766	6.92123	1
cyp2p6	1.33893	6.78661	2.14293	0.143228	6.9561	6.1439	1
hyi	3.69905	5.57389	2.14145	0.143367	6.17766	5.33493	1
mapk11	3.69905	5.57389	2.14145	0.143367	6.17766	5.33493	1
itgb4	3.69905	5.57389	2.14145	0.143367	6.17766	5.33493	1
zgc:101583	3.69905	5.57389	2.14145	0.143367	6.17766	5.33493	1
adprhl2	3.69275	5.57377	2.13578	0.143897	6.17795	5.33493	1
plrg1	3.69275	5.57377	2.13578	0.143897	6.17795	5.33493	1
phpt1	3.69275	5.57377	2.13578	0.143897	6.17795	5.33493	1
eef2a.1	-3.68937	5.57375	2.13576	0.143899	5.37003	6.14223	1
stx11a	-3.68937	5.57375	2.13576	0.143899	5.37003	6.14223	1
dync1h1	-0.606362	8.13534	2.13186	0.144266	8.01472	8.50858	1
taf5	3.68687	5.57373	2.13081	0.144364	6.17843	5.33493	1
cybb	3.68687	5.57373	2.13081	0.144364	6.17843	5.33493	1
si:ch211-51h9.7	-3.66744	5.57335	2.1162	0.145748	5.37003	6.14077	1
si:busm1-266f07.2	-3.66744	5.57335	2.1162	0.145748	5.37003	6.14077	1
eipr1	-3.66744	5.57335	2.1162	0.145748	5.37003	6.14077	1
si:dkey-266f7.5	-3.66744	5.57335	2.1162	0.145748	5.37003	6.14077	1
rhof	-3.66744	5.57335	2.1162	0.145748	5.37003	6.14077	1
snrpb2	-3.66744	5.57335	2.1162	0.145748	5.37003	6.14077	1
proza	0.896295	7.45641	2.11399	0.145958	7.76264	7.03609	1
rpl7a	-0.190128	11.8184	2.10373	0.14694	11.8386	11.9865	1
tnfrsf1a	1.09801	6.71802	2.10236	0.147072	7.277	6.50364	1
rpl28	-0.585602	9.92325	2.09568	0.147716	9.71212	10.2331	1
fam129ba	-1.34821	6.88186	2.0929	0.147985	6.17795	6.92123	1
tmed7	-1.47705	6.41328	2.09243	0.148031	5.95495	6.65508	1
igfbp3	-1.47744	6.45502	2.09201	0.148071	5.95524	6.6566	1
fkbp1aa	0.789215	7.51727	2.09106	0.148163	8.01446	7.33892	1
fzr1a	-1.47802	6.32713	2.09081	0.148188	5.95524	6.65949	1
si:dkey-85k7.7	-1.4776	6.49756	2.08827	0.148434	5.95524	6.65797	1
erbin	-1.47682	6.3265	2.08765	0.148494	5.95577	6.6566	1
kcnj14	-1.47833	6.28166	2.08233	0.149012	5.95495	6.66087	1
rnaseka	-1.47758	6.28116	2.08049	0.149193	5.95577	6.65949	1
hif1al2	-1.47731	6.28104	2.07918	0.14932	5.95524	6.6566	1
wdr43	-1.47731	6.28079	2.07911	0.149327	5.95524	6.6566	1
rbfox1l	-1.47811	6.57619	2.0741	0.149819	5.95495	6.65949	1
eif4a1a	1.47046	6.41409	2.07312	0.149914	6.69295	5.92041	1
hipk2	1.47046	6.37176	2.07246	0.149979	6.69295	5.92041	1
gbp	1.47046	6.37054	2.0724	0.149985	6.69295	5.92041	1
pfkfb4a	1.46988	6.41473	2.07205	0.150019	6.69336	5.92215	1
higd2a	1.47032	6.37114	2.07186	0.150039	6.69228	5.92041	1
tnksb	1.47027	6.45584	2.07074	0.150149	6.69254	5.92041	1
naa15b	1.46953	6.3711	2.07008	0.150214	6.69228	5.92215	1
trpm7	1.47027	6.32628	2.06774	0.150444	6.69254	5.92041	1
fgfr2	1.46949	6.49626	2.06506	0.150709	6.69228	5.92215	1
sec14l1	-1.47871	6.23433	2.06404	0.15081	5.95495	6.66087	1
rad23aa	-1.47837	6.23458	2.06361	0.150852	5.95577	6.66087	1
pak4	-1.47787	6.23449	2.0622	0.150993	5.95577	6.65949	1
anks1b	-1.47787	6.23417	2.06203	0.151009	5.95577	6.65949	1
ranbp9	1.471	6.27984	2.06059	0.151152	6.69377	5.91892	1
dhps	-3.19258	5.71944	2.06001	0.15121	5.37003	5.92215	1
actr8	-3.19258	5.71944	2.06001	0.15121	5.37003	5.92215	1
ikbkg	1.47086	6.2796	2.05996	0.151214	6.69336	5.91892	1
jph1a	-1.08523	6.97052	2.05975	0.151235	6.69254	7.42205	1
zswim5	-3.19259	5.71932	2.05969	0.151241	5.37003	5.92215	1
si:rp71-1g18.1	-3.19259	5.71932	2.05969	0.151241	5.37003	5.92215	1
tbc1d7	-3.19259	5.71932	2.05969	0.151241	5.37003	5.92215	1
cand1	1.47065	6.28051	2.05933	0.151277	6.69228	5.91892	1
plk2b	-1.47664	6.61178	2.05914	0.151296	5.95577	6.6566	1
zgc:153240	-3.1926	5.71905	2.05899	0.15131	5.37003	5.92215	1
pithd1	-3.1926	5.71905	2.05899	0.15131	5.37003	5.92215	1
cdkn2aipnl	-3.19261	5.71892	2.05865	0.151344	5.37003	5.92215	1
si:dkeyp-55f12.3	-3.19261	5.71892	2.05865	0.151344	5.37003	5.92215	1
dnajc28	-3.19262	5.71865	2.05796	0.151413	5.37003	5.92215	1
lhfpl6	-3.19263	5.71852	2.05764	0.151444	5.37003	5.92215	1
ms4a17a.11	-3.19263	5.71852	2.05764	0.151444	5.37003	5.92215	1
zgc:101783	-3.19265	5.71825	2.05695	0.151513	5.37003	5.92215	1
ttc19	1.47075	6.57436	2.05289	0.151918	6.69228	5.91892	1
zgc:77849	0.771044	7.78785	2.04913	0.152293	7.89417	7.24387	1
eif3i	-0.632034	8.64005	2.04855	0.152351	8.32489	8.85644	1
syap1	1.09383	6.75307	2.04703	0.152503	7.27724	6.50817	1
calm3a	-1.47654	6.64907	2.04436	0.152771	5.95577	6.6566	1
h3f3c	-0.899142	7.39173	2.04292	0.152916	7.07174	7.72484	1
pecr	-2.08792	5.91206	2.04155	0.153054	5.6924	6.50817	1
arf6a	1.47041	6.23339	2.03938	0.153272	6.69228	5.92041	1
h3f3a	1.47035	6.23284	2.03906	0.153304	6.69295	5.92041	1
ablim3	-3.16948	5.71892	2.03653	0.15356	5.37003	5.92041	1
rab35b	-3.16948	5.71891	2.03651	0.153562	5.37003	5.92041	1
znf362a	-3.16948	5.71885	2.03634	0.153579	5.37003	5.92041	1
zbtb18	-3.16948	5.71885	2.03634	0.153579	5.37003	5.92041	1
zc3hc1	-3.16948	5.71879	2.03618	0.153594	5.37003	5.92041	1
cryz	-3.16948	5.71873	2.03602	0.153611	5.37003	5.92041	1
tspan18b	-3.16948	5.71872	2.036	0.153613	5.37003	5.92041	1
reps1	3.17184	5.71905	2.03582	0.153631	5.95495	5.33493	1
cthl	-3.16948	5.71859	2.03568	0.153646	5.37003	5.92041	1
gpr137	-3.16948	5.71858	2.03565	0.153649	5.37003	5.92041	1
dnajc19	-3.16948	5.71858	2.03565	0.153649	5.37003	5.92041	1
riox2	-3.16948	5.71858	2.03565	0.153649	5.37003	5.92041	1
xpnpep2	-3.16948	5.71858	2.03565	0.153649	5.37003	5.92041	1
mrpl22	-3.16948	5.71858	2.03565	0.153649	5.37003	5.92041	1
kcnj2a	-3.16948	5.71858	2.03565	0.153649	5.37003	5.92041	1
scn3b	0.770526	7.7556	2.03557	0.153656	7.89465	7.24521	1
ets2	3.17184	5.71887	2.03534	0.153679	5.95495	5.33493	1
plxna3	-3.16948	5.71846	2.03533	0.153681	5.37003	5.92041	1
trip4	-3.16948	5.71846	2.03533	0.153681	5.37003	5.92041	1
zgc:153993	3.17184	5.71886	2.03532	0.153682	5.95495	5.33493	1
tm4sf18	-3.16948	5.71845	2.0353	0.153683	5.37003	5.92041	1
ptpn4b	-3.16948	5.71845	2.0353	0.153683	5.37003	5.92041	1
alkbh5	-3.16948	5.71845	2.0353	0.153683	5.37003	5.92041	1
bend3	-3.16948	5.71845	2.0353	0.153683	5.37003	5.92041	1
si:ch73-173h19.3	-3.16948	5.71833	2.03498	0.153716	5.37003	5.92041	1
med19b	-3.16948	5.71833	2.03498	0.153716	5.37003	5.92041	1
mtmr6	3.17185	5.7186	2.03465	0.153749	5.95495	5.33493	1
kcnk6	3.17185	5.7186	2.03465	0.153749	5.95495	5.33493	1
ticrr	3.17185	5.71854	2.0345	0.153765	5.95495	5.33493	1
tfe3b	3.17185	5.71854	2.0345	0.153765	5.95495	5.33493	1
pcmtd2	3.17185	5.71847	2.03433	0.153782	5.95495	5.33493	1
yju2	3.17185	5.71847	2.03431	0.153784	5.95495	5.33493	1
dnaja2	0.645916	9.10253	2.03376	0.15384	9.4996	8.8605	1
si:ch211-251j10.3	-3.16948	5.71779	2.03359	0.153856	5.37003	5.92041	1
idh2	-0.135907	12.3126	2.03225	0.153993	12.159	12.2586	1
LOC100001344	3.16532	5.71894	2.02936	0.154286	5.95524	5.33493	1
dsg2.1	3.16532	5.71882	2.02907	0.154315	5.95524	5.33493	1
rnf113a	3.16532	5.71875	2.02888	0.154334	5.95524	5.33493	1
adgra3	3.16532	5.71862	2.02854	0.154368	5.95524	5.33493	1
tmx3b	3.16532	5.71848	2.02819	0.154404	5.95524	5.33493	1
pole4	3.16532	5.71848	2.02819	0.154404	5.95524	5.33493	1
btg2	3.16532	5.71848	2.02817	0.154406	5.95524	5.33493	1
nelfb	3.16532	5.71848	2.02817	0.154406	5.95524	5.33493	1
tmem18	3.16532	5.71842	2.02804	0.15442	5.95524	5.33493	1
lta4h	3.16532	5.71836	2.02787	0.154437	5.95524	5.33493	1
snx11	3.16532	5.71836	2.02787	0.154437	5.95524	5.33493	1
emc6	3.16532	5.71836	2.02787	0.154437	5.95524	5.33493	1
exoc5	3.16532	5.71836	2.02787	0.154437	5.95524	5.33493	1
csnk1e	3.16532	5.71835	2.02785	0.154439	5.95524	5.33493	1
thap12a	3.16532	5.71835	2.02785	0.154439	5.95524	5.33493	1
gnl2	-1.09863	6.78531	2.02745	0.15448	6.54031	7.23877	1
yipf2	3.16532	5.71809	2.02718	0.154507	5.95524	5.33493	1
ephx1	3.16532	5.71808	2.02716	0.154509	5.95524	5.33493	1
ddx55	3.16532	5.71796	2.02684	0.154542	5.95524	5.33493	1
med27	3.16532	5.71796	2.02684	0.154542	5.95524	5.33493	1
grpel2	1.4703	6.64871	2.02607	0.15462	6.69295	5.92041	1
sparc	0.626011	8.73401	2.0257	0.154658	9.07103	8.46375	1
synj2bp	1.47045	6.65023	2.02567	0.15466	6.69228	5.92041	1
atp5mea	0.975289	7.20804	2.02551	0.154677	7.6921	6.92123	1
eif5a2	1.08198	7.02788	2.02466	0.154764	7.45737	6.65797	1
tmem106a	-2.07955	5.91173	2.02404	0.154826	5.6924	6.50661	1
sec11a	3.15943	5.71871	2.02339	0.154893	5.95577	5.33493	1
wdr48b	3.15943	5.7187	2.02337	0.154896	5.95577	5.33493	1
utp4	-1.47766	6.18442	2.02321	0.154911	5.95524	6.65797	1
znf76	3.15942	5.71844	2.02269	0.154964	5.95577	5.33493	1
ass1	3.15942	5.71843	2.02267	0.154966	5.95577	5.33493	1
mlxip	3.15942	5.71804	2.02166	0.15507	5.95577	5.33493	1
htatsf1	-1.47675	6.18453	2.02089	0.155148	5.95524	6.6566	1
snu13a	-2.07704	5.91178	2.01897	0.155344	5.69182	6.50661	1
gnao1a	-3.14693	5.71858	2.01446	0.155807	5.37003	5.91892	1
cep131	-3.14692	5.71852	2.0143	0.155823	5.37003	5.91892	1
natd1	-3.14692	5.71845	2.01414	0.15584	5.37003	5.91892	1
adgrg6	-3.14692	5.71845	2.01414	0.15584	5.37003	5.91892	1
fem1a	-3.14692	5.71844	2.01411	0.155842	5.37003	5.91892	1
ppifa	-3.14691	5.71832	2.01379	0.155875	5.37003	5.91892	1
usf1	-3.14691	5.7182	2.01347	0.155908	5.37003	5.91892	1
sec24d	-3.14691	5.71818	2.01342	0.155914	5.37003	5.91892	1
glcci1a	-3.14691	5.71818	2.01342	0.155914	5.37003	5.91892	1
gga3	-3.1469	5.71806	2.01312	0.155945	5.37003	5.91892	1
cbx8b	-3.1469	5.71806	2.01312	0.155945	5.37003	5.91892	1
tmem120a	-3.1469	5.71805	2.01309	0.155947	5.37003	5.91892	1
lect2l	-3.14689	5.71778	2.0124	0.156019	5.37003	5.91892	1
cwc27	-3.14688	5.71766	2.01207	0.156052	5.37003	5.91892	1
aldh7a1	-0.979886	7.37038	2.01145	0.156116	6.8296	7.50761	1
eef1da	-0.620732	9.55774	2.00728	0.156545	9.39325	9.94392	1
cd2ap	-2.07145	5.91095	2.00515	0.156766	5.6924	6.5052	1
tp53	1.47025	6.1847	2.00236	0.157054	6.69254	5.92041	1
pho	1.47022	6.18444	2.00217	0.157075	6.69295	5.92041	1
cdkn1ba	1.47025	6.18412	2.00179	0.157114	6.69254	5.92041	1
sec24c	-2.06892	5.911	2.00008	0.157291	5.69182	6.5052	1
msh2	-2.06892	5.91088	1.99951	0.15735	5.69182	6.5052	1
prkacbb	1.46893	6.18493	1.99943	0.157358	6.69228	5.92215	1
rassf8b	1.4686	6.18486	1.9988	0.157424	6.69336	5.92215	1
rpz2	2.06951	5.91066	1.99875	0.157429	6.54101	5.65641	1
rpl13	-0.510878	10.2751	1.99684	0.157628	9.92583	10.3808	1
c2cd5	2.06362	5.91172	1.99217	0.158114	6.54004	5.65793	1
mcl1b	0.979616	7.13319	1.99195	0.158137	7.69239	6.91846	1
txndc15	2.06361	5.91133	1.99037	0.158302	6.54004	5.65793	1
itgb1a	-1.47646	6.75407	1.98951	0.158392	5.95524	6.6566	1
myl9b	0.555073	9.9971	1.98842	0.158506	10.3703	9.79817	1
gnaia	-0.974691	6.57455	1.98368	0.159003	6.69254	7.33637	1
hnrnph1l	2.05918	5.91155	1.98321	0.159053	6.54074	5.65793	1
zgc:55943	2.05918	5.91143	1.98264	0.159113	6.54074	5.65793	1
mrps24	-1.12577	6.37058	1.96932	0.16052	6.37086	7.03738	1
zgc:92429	-1.12533	6.3699	1.96764	0.160699	6.37086	7.03468	1
mrps7	-1.12563	6.49633	1.96114	0.161391	6.37086	7.03609	1
LOC103909937	-1.47723	6.13384	1.95601	0.16194	5.95495	6.65797	1
tp53bp2a	-1.12607	6.53697	1.95225	0.162345	6.37012	7.03738	1
rps14	-0.408683	10.691	1.94417	0.163217	10.4903	10.8506	1
aimp1	-0.900749	7.30189	1.9372	0.163973	7.07236	7.72597	1
cox14	-1.77007	6.45705	1.93255	0.16448	5.69182	6.33895	1
acsl1a	1.09308	6.8514	1.93236	0.164501	7.27724	6.50817	1
tiparp	-1.76956	6.37116	1.93189	0.164552	5.69182	6.33734	1
rnf141	-1.76941	6.45635	1.93099	0.16465	5.69182	6.33591	1
dag1	-1.12664	6.61277	1.9223	0.165603	6.37012	7.03868	1
bbox1	-1.12645	6.61266	1.92191	0.165646	6.37058	7.03868	1
si:ch73-281n10.2	-1.12448	6.61143	1.91585	0.166315	6.37086	7.03338	1
si:ch73-111k22.2	1.76186	6.41437	1.91468	0.166445	6.37086	5.65793	1
btbd10a	1.76204	6.37127	1.91467	0.166446	6.37058	5.65641	1
spcs2	1.762	6.36943	1.91453	0.166461	6.37086	5.65641	1
akr7a3	1.76164	6.41484	1.91399	0.166521	6.36984	5.65793	1
kcnq1	-1.76989	6.23391	1.91393	0.166528	5.69182	6.33734	1
bpgm	1.7616	6.41389	1.91391	0.16653	6.37012	5.65793	1
pbx2	-1.76938	6.23365	1.91279	0.166654	5.69182	6.33591	1
dnajc8	1.76207	6.32565	1.9124	0.166697	6.37058	5.65641	1
ticam1	-1.76853	6.233	1.91059	0.166898	5.69182	6.33429	1
fbl	-1.76753	6.23327	1.90917	0.167055	5.6924	6.33429	1
mrps26	1.76187	6.28092	1.9065	0.167352	6.37012	5.65641	1
uqcrfs1	0.601718	9.60525	1.89857	0.168238	9.97024	9.36041	1
echs1	-0.638806	8.06817	1.89814	0.168287	7.69313	8.19117	1
hdac9b	-1.77152	6.18569	1.89654	0.168466	5.69182	6.33895	1
med19a	1.76208	6.2332	1.89604	0.168522	6.37086	5.65641	1
srebf2	1.76171	6.2345	1.89569	0.168562	6.37058	5.65793	1
snx16	1.76171	6.23412	1.89557	0.168575	6.37058	5.65793	1
apc	-1.09848	6.91145	1.89473	0.168669	6.54031	7.24002	1
setd3	-1.12417	6.64789	1.89343	0.168816	6.37086	7.03338	1
mrps11	-1.76934	6.18452	1.89122	0.169064	5.69182	6.33591	1
yipf3	-1.76934	6.1841	1.89097	0.169093	5.69182	6.33591	1
dusp16	-1.76847	6.18542	1.89049	0.169147	5.6924	6.33591	1
hsp70.3	3.15871	5.6669	1.89011	0.169189	5.95577	5.33493	1
h3f3d	0.971599	7.28244	1.8887	0.169348	7.54116	6.79485	1
lpin1	-1.7672	6.18403	1.88688	0.169554	5.6924	6.33429	1
aldh2.2	-0.983093	7.22384	1.88297	0.169997	6.83026	7.50887	1
sh3bp4	-3.19596	5.64884	1.87825	0.170533	5.37003	5.92215	1
prpf3	-3.19596	5.64884	1.87825	0.170533	5.37003	5.92215	1
nr2c2	-3.19596	5.64884	1.87825	0.170533	5.37003	5.92215	1
pcdh17	-3.19596	5.64884	1.87825	0.170533	5.37003	5.92215	1
med25	-3.19596	5.64878	1.8781	0.17055	5.37003	5.92215	1
rnasen	-3.19596	5.64871	1.87794	0.170569	5.37003	5.92215	1
inip	-3.19596	5.6487	1.87791	0.170572	5.37003	5.92215	1
utp23	-3.19596	5.6487	1.87791	0.170572	5.37003	5.92215	1
zgc:66472	-3.19596	5.6487	1.87791	0.170572	5.37003	5.92215	1
nup43	-3.19596	5.6487	1.87791	0.170572	5.37003	5.92215	1
[truncated: 8,710 more rows]

## Sheet: abaKO vs abanrf2 double mutant
	logFC	logCPM	LR	PValue	Test_logCPM	control_logCPM	FDR
[truncated: 10,000 more rows]
